# Supplementary material for: ALS-linked loss of Cyclin-F function affects HSP90
Source: Life Sci Alliance. 2022 Sep 16;5(12):e202101359. doi: 10.26508/lsa.202101359 (PMC9481933; doi:10.26508/lsa.202101359)
Supplement: Supplementary file 2 [file LSA-2021-01359_TableS2.xlsx]

## Sheet: Legend
Tab #	Experiment	Type of data	Type of experiment	Cells & growth conditions	Related to
1	diGly Input	MaxQuant data without filterting	Input of denaturing IP corresponding to total proteome	SILAC labelled N2a cells, WT (light) vs. KO (heavy)	Figure S1B, S1C
2	diGly Input	Data after Perseus analysis	Input of denaturing IP corresponding to total proteome	SILAC labelled N2a cells, WT (light) vs. KO (heavy)	Figure S1B, S1C
3	diGly Input	MaxQuant data without filterting	Input of denaturing IP corresponding to total proteome	SILAC labelled SH-SY5Y cells, WT (light) vs. KO (heavy)	Figure S1B, S1C
4	diGly Input	Data after Perseus analysis	Input of denaturing IP corresponding to total proteome	SILAC labelled SH-SY5Y cells, WT (light) vs. KO (heavy)	Figure S1B, S1C
5	diGly Input	MaxQuant data without filterting	Input of denaturing IP corresponding to total proteome	SILAC labelled LCL cells, controls (light) vs. mutant cells (heavy)	Figure S1B, S1C
6	diGly Input	Data after Perseus analysis for ctrl1. vs. V335M	Input of denaturing IP corresponding to total proteome	SILAC labelled LCL cells, controls (light) vs. mutant cells (heavy)	Figure S1B, S1C
7	diGly Input	Data after Perseus analysis for ctrl2 vs. V335M	Input of denaturing IP corresponding to total proteome	SILAC labelled LCL cells, controls (light) vs. mutant cells (heavy)	Figure S1B, S1C
8	diGly Input	Data after Perseus analysis for ctrl3. vs. D628V	Input of denaturing IP corresponding to total proteome	SILAC labelled LCL cells, controls (light) vs. mutant cells (heavy)	Figure S1B, S1C
9	diGly Input	Data after Perseus analysis for ctrl4. vs. D628V	Input of denaturing IP corresponding to total proteome	SILAC labelled LCL cells, controls (light) vs. mutant cells (heavy)	Figure S1B, S1C
	Labelling in Paper	Labelling in Table
	LCL_ctrl1	V3656
	LCL_ctrl2	V549
	LCL_ctrl3	V79
	LCL_ctrl4	V6719
	LCL_V335M	V6604
	LCL_D628V	V7163
	N2a WT (wild type)	WT
	N2a CCNF KO	N2a cl.10
	SH-SY5Y WT (wild type)	WT
	SH-SY5Y CCNF KO	KO / cl.2
	heavy	h
	light	l
	Perseus Processing
	Filtering of contaminants
	Categorical annotation peptides
	Filter rows (Min valids = 3, In at least one group, Values = Greater than 1)
	Log2 transform LFQ values
	Categorical annotation LFQ
	Two Sample t-test, pVal < 0.05
	Two Sample t-test, FDR, qVal < 0.05

## Sheet: 1_N2a_IN_WT vs. KO_original
Protein IDs	Majority protein IDs	Peptide counts (all)	Peptide counts (razor+unique)	Peptide counts (unique)	Protein names	Gene names	Fasta headers	Number of proteins	Peptides	Razor + unique peptides	Unique peptides	Peptides WT(light)/cl10(heavy)_IN_1	Peptides WT(light)/cl10(heavy)_IN_2	Peptides WT(light)/cl10(heavy)_IN_3	Peptides WT(light)/cl10(heavy)_IN_4	Razor + unique peptides WT(light)/cl10(heavy)_IN_1	Razor + unique peptides WT(light)/cl10(heavy)_IN_2	Razor + unique peptides WT(light)/cl10(heavy)_IN_3	Razor + unique peptides WT(light)/cl10(heavy)_IN_4	Unique peptides WT(light)/cl10(heavy)_IN_1	Unique peptides WT(light)/cl10(heavy)_IN_2	Unique peptides WT(light)/cl10(heavy)_IN_3	Unique peptides WT(light)/cl10(heavy)_IN_4	Sequence coverage [%]	Unique + razor sequence coverage [%]	Unique sequence coverage [%]	Mol. weight [kDa]	Sequence length	Sequence lengths	Q-value	Score	Identification type WT(light)/cl10(heavy)_IN_1	Identification type WT(light)/cl10(heavy)_IN_2	Identification type WT(light)/cl10(heavy)_IN_3	Identification type WT(light)/cl10(heavy)_IN_4	Ratio H/L	Ratio H/L normalized	Ratio H/L variability [%]	Ratio H/L count	Ratio H/L iso-count	Ratio H/L type	Ratio H/L WT(light)/cl10(heavy)_IN_1	Ratio H/L WT(light)/cl10(heavy)_IN_2	Ratio H/L WT(light)/cl10(heavy)_IN_3	Ratio H/L WT(light)/cl10(heavy)_IN_4	Ratio H/L normalized WT(light)/cl10(heavy)_IN_1	Ratio H/L normalized WT(light)/cl10(heavy)_IN_2	Ratio H/L normalized WT(light)/cl10(heavy)_IN_3	Ratio H/L normalized WT(light)/cl10(heavy)_IN_4
A0A087WP63;A0A087WNX7;A0A087WNL7;A0A087WQ44;A0A0U1RQA7	A0A087WP63;A0A087WNX7;A0A087WNL7;A0A087WQ44	3;3;3;3;1	2;2;2;2;1	2;2;2;2;1		Srcap	tr|A0A087WP63|A0A087WP63_MOUSE Uncharacterized protein (Fragment) OS=Mus musculus OX=10090 GN=Gm42715 PE=1 SV=1;tr|A0A087WNX7|A0A087WNX7_MOUSE Snf2-related CREBBP activator protein OS=Mus musculus OX=10090 GN=Srcap PE=1 SV=1;tr|A0A087WNL7|A0A087WNL7_MOUSE	5	3	2	2	1	2	1	3	1	2	1	2	1	2	1	2	0.8	0.5	0.5	331.54	3095	3095;3114;3210;3271;254	0.0061816	1.6803	By MS/MS	By MS/MS	By MS/MS	By MS/MS	0.62657	1.0368	283	6	2	Median	NaN	0.047821	NaN	0.079016	NaN	0.070068	NaN	0.099475
A0A087WNP6;Q4VAA2;A0A087WRM0	A0A087WNP6;Q4VAA2	4;4;1	4;4;1	4;4;1	Protein CDV3	Cdv3	tr|A0A087WNP6|A0A087WNP6_MOUSE Protein CDV3 OS=Mus musculus OX=10090 GN=Cdv3 PE=1 SV=1;sp|Q4VAA2|CDV3_MOUSE Protein CDV3 OS=Mus musculus OX=10090 GN=Cdv3 PE=1 SV=2	3	4	4	4	3	3	3	3	3	3	3	3	3	3	3	3	24.7	24.7	24.7	24.196	235	235;281;154	0	22.084	By MS/MS	By MS/MS	By MS/MS	By MS/MS	0.17361	0.23166	83.093	6	6	Median	0.24843	NaN	0.092283	0.34657	0.34676	NaN	0.10262	0.4293
A0A087WQE6;A0A087WNT1;P83940;A0A087WPE4	A0A087WQE6;A0A087WNT1;P83940;A0A087WPE4	6;6;6;3	6;6;6;3	6;6;6;3	Transcription elongation factor B polypeptide 1	Tceb1	tr|A0A087WQE6|A0A087WQE6_MOUSE Elongin-C (Fragment) OS=Mus musculus OX=10090 GN=Eloc PE=1 SV=1;tr|A0A087WNT1|A0A087WNT1_MOUSE Elongin-C OS=Mus musculus OX=10090 GN=Eloc PE=1 SV=1;sp|P83940|ELOC_MOUSE Elongin-C OS=Mus musculus OX=10090 GN=Eloc PE=1 SV=1;tr|	4	6	6	6	5	5	5	5	5	5	5	5	5	5	5	5	76.8	76.8	76.8	10.657	95	95;134;112;51	0	30.071	By MS/MS	By MS/MS	By MS/MS	By MS/MS	0.7808	1.0389	13.183	18	7	Leave out requantified	0.66167	0.64224	0.72323	0.81242	0.93529	1.0799	1.0482	0.99828
A0A087WNV1;A0A087WSR7;A0A087WR52;Q8K2K6;A0A087WRL1	A0A087WNV1;A0A087WSR7;A0A087WR52;Q8K2K6;A0A087WRL1	2;2;2;2;1	2;2;2;2;1	2;2;2;2;1	Arf-GAP domain and FG repeat-containing protein 1	Agfg1	tr|A0A087WNV1|A0A087WNV1_MOUSE Arf-GAP domain and FG repeat-containing protein 1 OS=Mus musculus OX=10090 GN=Agfg1 PE=1 SV=1;tr|A0A087WSR7|A0A087WSR7_MOUSE Arf-GAP domain and FG repeat-containing protein 1 OS=Mus musculus OX=10090 GN=Agfg1 PE=1 SV=1;tr|A0A	5	2	2	2	0	0	0	2	0	0	0	2	0	0	0	2	7.5	7.5	7.5	53.974	521	521;537;580;561;200	0	6.0891				By MS/MS	NaN	NaN	NaN	1	1	Median	NaN	NaN	NaN	NaN	NaN	NaN	NaN	NaN
A0A087WNW3;A0A087WQI3;A0A087WQ25;A0A087WRS1;A0A087WQQ5;F8VQC7;Q61595;A0A087WQF8;A0A087WP48;A0A087WS04;A0A087WS29;A0A087WQG4;A0A087WQD0;A0A087WPW5;A0A087WS23;A0A087WP85;A0A087WP14;A0A087WPX0	A0A087WNW3;A0A087WQI3;A0A087WQ25;A0A087WRS1;A0A087WQQ5;F8VQC7;Q61595;A0A087WQF8;A0A087WP48;A0A087WS04;A0A087WS29;A0A087WQG4;A0A087WQD0;A0A087WPW5;A0A087WS23;A0A087WP85;A0A087WP14;A0A087WPX0	3;3;3;3;3;3;3;2;2;2;2;2;2;2;2;2;2;2	3;3;3;3;3;3;3;2;2;2;2;2;2;2;2;2;2;2	3;3;3;3;3;3;3;2;2;2;2;2;2;2;2;2;2;2	Kinectin	Ktn1	tr|A0A087WNW3|A0A087WNW3_MOUSE Kinectin OS=Mus musculus OX=10090 GN=Ktn1 PE=1 SV=1;tr|A0A087WQI3|A0A087WQI3_MOUSE Kinectin OS=Mus musculus OX=10090 GN=Ktn1 PE=1 SV=1;tr|A0A087WQ25|A0A087WQ25_MOUSE Kinectin OS=Mus musculus OX=10090 GN=Ktn1 PE=1 SV=1;tr|A0A0	18	3	3	3	3	3	3	3	3	3	3	3	3	3	3	3	3.2	3.2	3.2	143.15	1247	1247;1252;1270;1275;1275;1327;1327;1200;1223;1224;1228;1229;1247;1252;1253;1275;1280;1304	0	8.7186	By MS/MS	By MS/MS	By MS/MS	By MS/MS	0.66075	0.93518	16.57	10	2	Leave out requantified	0.68145	0.57779	0.54211	0.65676	0.95416	0.97171	0.7771	0.80217
A0A0A6YXZ1;E9Q8N5;Q08EB6;Q08EB5;F7DCH5;E9Q6L0;J3QP81;A0A087WS18;A0A087WQF1;A0A087WQ95;A0A087WNW8;A0A087WRK0;A0A087WP42;E9QNY9;A0A087WRE8;E9QKH0;A0A087WQ31;Q8BRT1;Q80TV8;A0A0N4SUT7;A0A1L1ST22	A0A0A6YXZ1;E9Q8N5;Q08EB6;Q08EB5;F7DCH5;E9Q6L0;J3QP81;A0A087WS18;A0A087WQF1;A0A087WQ95;A0A087WNW8;A0A087WRK0;A0A087WP42;E9QNY9;A0A087WRE8;E9QKH0;A0A087WQ31;Q8BRT1;Q80TV8;A0A0N4SUT7;A0A1L1ST22	2;2;2;2;2;2;2;2;2;2;2;2;2;2;2;2;2;2;2;1;1	2;2;2;2;2;2;2;2;2;2;2;2;2;2;2;2;2;2;2;1;1	2;2;2;2;2;2;2;2;2;2;2;2;2;2;2;2;2;2;2;1;1	CLIP-associating protein 2;CLIP-associating protein 1	Clasp1;Clasp2	tr|A0A0A6YXZ1|A0A0A6YXZ1_MOUSE CLIP-associating protein 1 OS=Mus musculus OX=10090 GN=Clasp1 PE=1 SV=2;tr|E9Q8N5|E9Q8N5_MOUSE CLIP-associating protein 2 OS=Mus musculus OX=10090 GN=Clasp2 PE=1 SV=1;tr|Q08EB6|Q08EB6_MOUSE CLIP-associating protein 2 OS=Mus m	21	2	2	2	1	1	1	2	1	1	1	2	1	1	1	2	2.4	2.4	2.4	136.62	1244	1244;1286;1287;1304;1307;1452;1459;1460;1468;1469;1475;1477;1492;1526;1526;1536;1552;1286;1535;285;600	0	5.7991	By MS/MS	By MS/MS	By matching	By MS/MS	0.72739	0.95976	13.839	8	1	Median	NaN	0.48508	0.76169	0.77815	NaN	0.82178	1.0884	0.92942
A0A087WNZ7;G5E870;A0A087WRV6;A0A0B4J1N9	A0A087WNZ7;G5E870;A0A087WRV6	3;3;2;1	3;3;2;1	3;3;2;1	E3 ubiquitin-protein ligase TRIP12	Trip12	tr|A0A087WNZ7|A0A087WNZ7_MOUSE E3 ubiquitin-protein ligase TRIP12 OS=Mus musculus OX=10090 GN=Trip12 PE=1 SV=1;sp|G5E870|TRIPC_MOUSE E3 ubiquitin-protein ligase TRIP12 OS=Mus musculus OX=10090 GN=Trip12 PE=1 SV=1;tr|A0A087WRV6|A0A087WRV6_MOUSE E3 ubiquitin	4	3	3	3	1	1	1	3	1	1	1	3	1	1	1	3	2	2	2	220.66	1992	1992;2025;830;982	0	4.5582	By MS/MS	By MS/MS	By MS/MS	By MS/MS	0.7815	1.1063	111.85	5	2	Median	NaN	0.98448	NaN	0.46509	NaN	1.1808	NaN	0.56076
A0A087WPL5;E9QNN1;O70133;Q3UR42;A0A0R4J2C3	A0A087WPL5;E9QNN1;O70133	30;30;29;14;8	30;30;29;14;8	30;30;29;14;8	ATP-dependent RNA helicase A	Dhx9	tr|A0A087WPL5|A0A087WPL5_MOUSE ATP-dependent RNA helicase A OS=Mus musculus OX=10090 GN=Dhx9 PE=1 SV=1;tr|E9QNN1|E9QNN1_MOUSE ATP-dependent RNA helicase A OS=Mus musculus OX=10090 GN=Dhx9 PE=1 SV=1;sp|O70133|DHX9_MOUSE ATP-dependent RNA helicase A OS=Mus m	5	30	30	30	20	24	24	22	20	24	24	22	20	24	24	22	25.7	25.7	25.7	149.62	1383	1383;1384;1380;735;459	0	164.69	By MS/MS	By MS/MS	By MS/MS	By MS/MS	0.66809	0.97161	40.024	80	40	Leave out requantified	0.71525	0.62028	0.6454	0.77863	1.0127	1.0417	0.93669	0.95894
A0A087WPY0;A0A087WS54;Q8R0F6	A0A087WPY0;A0A087WS54;Q8R0F6	1;1;1	1;1;1	1;1;1	Integrin-linked kinase-associated serine/threonine phosphatase 2C	Ilkap	tr|A0A087WPY0|A0A087WPY0_MOUSE Integrin-linked kinase-associated serine/threonine phosphatase 2C (Fragment) OS=Mus musculus OX=10090 GN=Ilkap PE=1 SV=1;tr|A0A087WS54|A0A087WS54_MOUSE Integrin-linked kinase-associated serine/threonine phosphatase 2C (Fragme	3	1	1	1	0	0	0	1	0	0	0	1	0	0	0	1	6.6	6.6	6.6	18.262	166	166;182;392	0.0053114	1.7616				By MS/MS	NaN	NaN	NaN	0	0	Median	NaN	NaN	NaN	NaN	NaN	NaN	NaN	NaN
A0A087WQ23;A0A0R4J0U8;A2RSY6	A0A087WQ23;A0A0R4J0U8;A2RSY6	1;1;1	1;1;1	1;1;1	TRMT1-like protein	Trmt1l	tr|A0A087WQ23|A0A087WQ23_MOUSE TRMT1-like protein OS=Mus musculus OX=10090 GN=Trmt1l PE=1 SV=1;tr|A0A0R4J0U8|A0A0R4J0U8_MOUSE RIKEN cDNA 1190005F20, isoform CRA_a OS=Mus musculus OX=10090 GN=Trmt1l PE=1 SV=1;sp|A2RSY6|TRM1L_MOUSE TRMT1-like protein OS=Mus	3	1	1	1	1	1	1	0	1	1	1	0	1	1	1	0	7.6	7.6	7.6	17.582	158	158;728;728	0	3.0092	By MS/MS	By MS/MS	By MS/MS		0.43756	0.71207	61.449	3	0	Median	NaN	NaN	NaN	NaN	NaN	NaN	NaN	NaN
A0A087WRN1;A0A087WQA0;F8WI22;Q8K019;A0A087WRF8	A0A087WRN1;A0A087WQA0;F8WI22;Q8K019	7;7;7;7;1	7;7;7;7;1	7;7;7;7;1	Bcl-2-associated transcription factor 1	Bclaf1	tr|A0A087WRN1|A0A087WRN1_MOUSE Bcl-2-associated transcription factor 1 (Fragment) OS=Mus musculus OX=10090 GN=Bclaf1 PE=1 SV=1;tr|A0A087WQA0|A0A087WQA0_MOUSE Bcl-2-associated transcription factor 1 OS=Mus musculus OX=10090 GN=Bclaf1 PE=1 SV=1;tr|F8WI22|F8W	5	7	7	7	3	6	5	5	3	6	5	5	3	6	5	5	13.2	13.2	13.2	67.703	583	583;750;870;919;43	0	13.483	By MS/MS	By MS/MS	By MS/MS	By MS/MS	0.70265	0.99774	5.2361	19	7	Leave out requantified	0.74616	0.59858	0.61722	0.77901	0.87717	1.0264	0.89087	0.94897
A0A087WQS2;Q9CQC6;A0A087WPF9;A0A087WS48	A0A087WQS2;Q9CQC6;A0A087WPF9	8;8;6;1	7;7;6;1	7;7;6;1	Basic leucine zipper and W2 domain-containing protein 1	Bzw1	tr|A0A087WQS2|A0A087WQS2_MOUSE Basic leucine zipper and W2 domain-containing protein 1 OS=Mus musculus OX=10090 GN=Bzw1 PE=1 SV=1;sp|Q9CQC6|BZW1_MOUSE Basic leucine zipper and W2 domain-containing protein 1 OS=Mus musculus OX=10090 GN=Bzw1 PE=1 SV=1;tr|A0A	4	8	7	7	5	3	5	3	4	2	4	2	4	2	4	2	13.7	12.2	12.2	51.209	451	451;419;253;105	0	10.093	By MS/MS	By MS/MS	By MS/MS	By MS/MS	0.6379	0.97304	89.775	9	5	Median	0.73353	0.54317	0.6379	NaN	1.0112	0.91533	0.92404	NaN
A0A087WRI1;Q8CFQ1;Q99K94;Q8C3V4;A0A087WSP5;P42225	A0A087WRI1;Q8CFQ1;Q99K94;Q8C3V4;A0A087WSP5;P42225	1;1;1;1;1;1	1;1;1;1;1;1	1;1;1;1;1;1	Signal transducer and activator of transcription;Signal transducer and activator of transcription 1	Stat1	tr|A0A087WRI1|A0A087WRI1_MOUSE Signal transducer and activator of transcription 1 (Fragment) OS=Mus musculus OX=10090 GN=Stat1 PE=1 SV=1;tr|Q8CFQ1|Q8CFQ1_MOUSE Signal transducer and activator of transcription 1 (Fragment) OS=Mus musculus OX=10090 GN=Stat1	6	1	1	1	1	0	0	1	1	0	0	1	1	0	0	1	9.2	9.2	9.2	15.068	131	131;243;712;749;755;749	0	3.5783	By MS/MS			By MS/MS	0.51317	0.68478	14.522	2	2	Median	NaN	NaN	NaN	NaN	NaN	NaN	NaN	NaN
A0A087WRY3;Q80XU3	A0A087WRY3;Q80XU3	1;1	1;1	1;1	Nuclear ubiquitous casein and cyclin-dependent kinase substrate 1	Nucks1	tr|A0A087WRY3|A0A087WRY3_MOUSE Nuclear ubiquitous casein and cyclin-dependent kinase substrate 1 OS=Mus musculus OX=10090 GN=Nucks1 PE=1 SV=1;sp|Q80XU3|NUCKS_MOUSE Nuclear ubiquitous casein and cyclin-dependent kinase substrate 1 OS=Mus musculus OX=10090 G	2	1	1	1	1	1	1	1	1	1	1	1	1	1	1	1	3.9	3.9	3.9	26.184	233	233;234	0.0034878	1.9764	By MS/MS	By MS/MS	By MS/MS	By MS/MS	0.61004	0.929	9.5131	4	0	Median	NaN	NaN	NaN	NaN	NaN	NaN	NaN	NaN
S4R294;S4R2J9;A0A0A0MQ79;Q3TLH4;S4R2E2;S4R298;S4R2L9;S4R209	S4R294;S4R2J9;A0A0A0MQ79;Q3TLH4;S4R2E2	3;3;3;3;2;1;1;1	3;3;3;3;2;1;1;1	2;2;2;2;1;0;1;1	Protein PRRC2C	Prrc2c	tr|S4R294|S4R294_MOUSE Protein PRRC2C OS=Mus musculus OX=10090 GN=Prrc2c PE=1 SV=1;tr|S4R2J9|S4R2J9_MOUSE Protein PRRC2C OS=Mus musculus OX=10090 GN=Prrc2c PE=1 SV=1;tr|A0A0A0MQ79|A0A0A0MQ79_MOUSE Protein PRRC2C OS=Mus musculus OX=10090 GN=Prrc2c PE=1 SV=1	8	3	3	2	2	2	0	0	2	2	0	0	1	1	0	0	1.1	1.1	0.8	298.11	2724	2724;2765;2844;2846;564;149;1276;1515	0	4.1876	By MS/MS	By MS/MS			0.60848	0.866	15.23	3	3	Median	NaN	0.58128	NaN	NaN	NaN	0.97815	NaN	NaN
A0A0G2JFY0;A0A0A0MQ80;Q3UMC0;D3Z0U5;D6RGM7;D3Z4J2;Q9D3R6	A0A0G2JFY0;A0A0A0MQ80;Q3UMC0	3;3;3;1;1;1;1	3;3;3;1;1;1;1	3;3;3;1;1;1;1	Spermatogenesis-associated protein 5	Spata5	tr|A0A0G2JFY0|A0A0G2JFY0_MOUSE Spermatogenesis-associated protein 5 OS=Mus musculus OX=10090 GN=Spata5 PE=1 SV=1;tr|A0A0A0MQ80|A0A0A0MQ80_MOUSE Spermatogenesis-associated protein 5 OS=Mus musculus OX=10090 GN=Spata5 PE=1 SV=1;sp|Q3UMC0|SPAT5_MOUSE Spermato	7	3	3	3	3	2	3	2	3	2	3	2	3	2	3	2	5.3	5.3	5.3	91.287	842	842;892;893;277;372;495;539	0	6.5975	By MS/MS	By MS/MS	By MS/MS	By MS/MS	0.2766	0.40778	27.357	5	5	Median	0.23492	NaN	NaN	NaN	0.29115	NaN	NaN	NaN
F6Q750;A0A0A0MQA6;F7ACR9;E9QNP1;B1ARU1;E9QA63;B1ARU4;E9PVY8;Q9QXZ0;A0A0A0MQH5	F6Q750;A0A0A0MQA6;F7ACR9;E9QNP1;B1ARU1;E9QA63;B1ARU4;E9PVY8;Q9QXZ0	3;3;3;3;3;3;3;3;3;1	3;3;3;3;3;3;3;3;3;1	3;3;3;3;3;3;3;3;3;1	Microtubule-actin cross-linking factor 1	Macf1	tr|F6Q750|F6Q750_MOUSE Microtubule-actin cross-linking factor 1 (Fragment) OS=Mus musculus OX=10090 GN=Macf1 PE=1 SV=1;tr|A0A0A0MQA6|A0A0A0MQA6_MOUSE Microtubule-actin cross-linking factor 1 OS=Mus musculus OX=10090 GN=Macf1 PE=1 SV=1;tr|F7ACR9|F7ACR9_MOUS	10	3	3	3	1	3	2	1	1	3	2	1	1	3	2	1	1.1	1.1	1.1	504.22	4429	4429;5328;5333;5478;5895;7351;7353;7355;7354;369	0	3.5575	By MS/MS	By MS/MS	By MS/MS	By matching	0.812	1.116	15.217	4	0	Median	NaN	NaN	NaN	NaN	NaN	NaN	NaN	NaN
A0A0A0MQF6;P16858;S4R1W1;A0A1D5RLD8;S4R257;V9GX06;V9GXA7;A0A0R4J0X7;S4R2G5;Q64467;S4R1W8;S4R1N5;V9GXK0	A0A0A0MQF6;P16858;S4R1W1;A0A1D5RLD8;S4R257	16;16;15;15;13;4;2;2;2;2;1;1;1	16;16;15;15;13;4;2;2;2;2;1;1;1	16;16;15;15;13;4;2;2;2;2;1;1;1	Glyceraldehyde-3-phosphate dehydrogenase	Gapdh;Gm3839	tr|A0A0A0MQF6|A0A0A0MQF6_MOUSE Glyceraldehyde-3-phosphate dehydrogenase OS=Mus musculus OX=10090 GN=Gapdh PE=1 SV=1;sp|P16858|G3P_MOUSE Glyceraldehyde-3-phosphate dehydrogenase OS=Mus musculus OX=10090 GN=Gapdh PE=1 SV=2;tr|S4R1W1|S4R1W1_MOUSE Glyceraldehy	13	16	16	16	11	13	15	10	11	13	15	10	11	13	15	10	53.5	53.5	53.5	38.653	359	359;333;333;333;280;183;121;438;440;440;55;57;151	0	86.729	By MS/MS	By MS/MS	By MS/MS	By MS/MS	0.60433	0.86025	5.7261	79	15	Leave out requantified	0.59826	0.50654	0.59691	0.72392	0.83787	0.83604	0.8609	0.88661
A0A0A0MQM0;P63242;Q8BGY2;J3QPS8	A0A0A0MQM0;P63242;Q8BGY2	5;5;4;1	5;5;4;1	5;5;4;1	Eukaryotic translation initiation factor 5A;Eukaryotic translation initiation factor 5A-1;Eukaryotic translation initiation factor 5A-2	Eif5a;Eif5a2	tr|A0A0A0MQM0|A0A0A0MQM0_MOUSE Eukaryotic translation initiation factor 5A (Fragment) OS=Mus musculus OX=10090 GN=Eif5a PE=1 SV=1;sp|P63242|IF5A1_MOUSE Eukaryotic translation initiation factor 5A-1 OS=Mus musculus OX=10090 GN=Eif5a PE=1 SV=2;sp|Q8BGY2|IF5A	4	5	5	5	5	4	5	5	5	4	5	5	5	4	5	5	38.3	38.3	38.3	16.302	149	149;154;153;76	0	27.758	By MS/MS	By MS/MS	By MS/MS	By MS/MS	0.6583	0.9593	2.0234	40	2	Leave out requantified	0.67945	0.57955	0.63764	0.80158	0.95502	0.96315	0.94568	0.99036
A0A0A6YVS2;Q921L3	A0A0A6YVS2;Q921L3	2;2	2;2	2;2	Transmembrane and coiled-coil domain-containing protein 1	Tmco1	tr|A0A0A6YVS2|A0A0A6YVS2_MOUSE Calcium load-activated calcium channel (Fragment) OS=Mus musculus OX=10090 GN=Tmco1 PE=1 SV=1;sp|Q921L3|TMCO1_MOUSE Calcium load-activated calcium channel OS=Mus musculus OX=10090 GN=Tmco1 PE=1 SV=1	2	2	2	2	1	1	2	1	1	1	2	1	1	1	2	1	12	12	12	22.283	200	200;188	0	4.689	By MS/MS	By MS/MS	By MS/MS	By MS/MS	0.29748	0.33998	70.017	5	5	Median	NaN	NaN	0.63416	NaN	NaN	NaN	0.70516	NaN
A0A0A6YVU8;Q9JKV1;D3YUD8	A0A0A6YVU8;Q9JKV1	3;3;1	3;3;1	3;3;1	Proteasomal ubiquitin receptor ADRM1	Gm9774;Adrm1	tr|A0A0A6YVU8|A0A0A6YVU8_MOUSE MCG119397 OS=Mus musculus OX=10090 GN=Gm9774 PE=4 SV=1;sp|Q9JKV1|ADRM1_MOUSE Proteasomal ubiquitin receptor ADRM1 OS=Mus musculus OX=10090 GN=Adrm1 PE=1 SV=2	3	3	3	3	2	1	2	1	2	1	2	1	2	1	2	1	9.8	9.8	9.8	42.147	407	407;407;309	0	12.011	By MS/MS	By MS/MS	By MS/MS	By MS/MS	0.083504	0.11632	113.63	5	5	Median	0.072614	NaN	NaN	NaN	0.10115	NaN	NaN	NaN
A0A0A6YXE3;A0A0A6YWB0;G3X9Q0;A0A2K6EDM5;A0A0A6YVV8;Q9JKP5;Q8C181;A0A0A6YXP3;A0A0A6YXL7;A0A0A6YWJ5;A0A2I3BRX8;Q3U570;A0A0A6YWG1;Q3U581;A0A0A6YXQ4;S4R267;Q8R003	A0A0A6YXE3;A0A0A6YWB0;G3X9Q0;A0A2K6EDM5;A0A0A6YVV8;Q9JKP5;Q8C181;A0A0A6YXP3;A0A0A6YXL7;A0A0A6YWJ5;A0A2I3BRX8;Q3U570;A0A0A6YWG1;Q3U581;A0A0A6YXQ4;S4R267;Q8R003	2;2;2;2;2;2;2;1;1;1;1;1;1;1;1;1;1	2;2;2;2;2;2;2;1;1;1;1;1;1;1;1;1;1	2;2;2;2;2;2;2;1;1;1;1;1;1;1;1;1;1	Muscleblind-like protein 1;Muscleblind-like protein 2;Muscleblind-like protein 3	Mbnl1;Mbnl2;Mbnl3	tr|A0A0A6YXE3|A0A0A6YXE3_MOUSE Muscleblind-like protein 1 OS=Mus musculus OX=10090 GN=Mbnl1 PE=1 SV=1;tr|A0A0A6YWB0|A0A0A6YWB0_MOUSE Muscleblind-like protein 1 OS=Mus musculus OX=10090 GN=Mbnl1 PE=1 SV=1;tr|G3X9Q0|G3X9Q0_MOUSE Muscleblind-like 1 (Drosophil	17	2	2	2	2	1	1	2	2	1	1	2	2	1	1	2	6	6	6	33.05	302	302;347;381;385;387;341;373;182;192;209;253;254;257;289;302;332;342	0.0030196	2.0379	By MS/MS	By matching	By matching	By MS/MS	0.69703	0.92694	23.752	5	0	Leave out requantified	NaN	NaN	NaN	0.85922	NaN	NaN	NaN	1.0497
A0A0A6YVX4;Q8CII2	A0A0A6YVX4;Q8CII2	1;1	1;1	1;1	Cell division cycle protein 123 homolog	Cdc123	tr|A0A0A6YVX4|A0A0A6YVX4_MOUSE Cell division cycle protein 123 homolog (Fragment) OS=Mus musculus OX=10090 GN=Cdc123 PE=1 SV=1;sp|Q8CII2|CD123_MOUSE Cell division cycle protein 123 homolog OS=Mus musculus OX=10090 GN=Cdc123 PE=1 SV=2	2	1	1	1	1	0	0	1	1	0	0	1	1	0	0	1	7.5	7.5	7.5	15.015	134	134;336	0.0035088	2.0102	By MS/MS			By MS/MS	NaN	NaN	NaN	1	0	Median	NaN	NaN	NaN	NaN	NaN	NaN	NaN	NaN
A0A0A6YXC8;E9QKR1;A0A0A6YW06;J3QNM3;E9QKQ9;E9QLZ9;Q03173;A0A0A6YVZ6	A0A0A6YXC8;E9QKR1;A0A0A6YW06;J3QNM3;E9QKQ9;E9QLZ9;Q03173;A0A0A6YVZ6	3;3;3;3;3;3;3;2	3;3;3;3;3;3;3;2	3;3;3;3;3;3;3;2	Protein enabled homolog	Enah	tr|A0A0A6YXC8|A0A0A6YXC8_MOUSE Protein enabled homolog OS=Mus musculus OX=10090 GN=Enah PE=1 SV=1;tr|E9QKR1|E9QKR1_MOUSE Protein enabled homolog OS=Mus musculus OX=10090 GN=Enah PE=1 SV=2;tr|A0A0A6YW06|A0A0A6YW06_MOUSE Protein enabled homolog OS=Mus muscul	8	3	3	3	2	0	0	1	2	0	0	1	2	0	0	1	4.8	4.8	4.8	58.35	524	524;562;785;789;789;804;802;229	0	6.1044	By MS/MS			By MS/MS	0.22202	0.25736	247.94	2	2	Median	NaN	NaN	NaN	NaN	NaN	NaN	NaN	NaN
A0A0A6YW87;Q9CX13	A0A0A6YW87;Q9CX13	1;1	1;1	1;1	Protein cornichon homolog 4	Cnih4	tr|A0A0A6YW87|A0A0A6YW87_MOUSE Cornichon homolog 4 (Drosophila), isoform CRA_a OS=Mus musculus OX=10090 GN=Cnih4 PE=1 SV=1;sp|Q9CX13|CNIH4_MOUSE Protein cornichon homolog 4 OS=Mus musculus OX=10090 GN=Cnih4 PE=2 SV=1	2	1	1	1	0	0	0	1	0	0	0	1	0	0	0	1	25.6	25.6	25.6	9.22	78	78;139	0.001087	2.693				By MS/MS	NaN	NaN	NaN	0	0	Median	NaN	NaN	NaN	NaN	NaN	NaN	NaN	NaN
A0A0A6YWP6;A0A0A6YX18;Q8BVE3	A0A0A6YWP6;A0A0A6YX18;Q8BVE3	3;3;3	3;3;3	3;3;3	V-type proton ATPase subunit H	Atp6v1h	tr|A0A0A6YWP6|A0A0A6YWP6_MOUSE V-type proton ATPase subunit H OS=Mus musculus OX=10090 GN=Atp6v1h PE=1 SV=1;tr|A0A0A6YX18|A0A0A6YX18_MOUSE V-type proton ATPase subunit H OS=Mus musculus OX=10090 GN=Atp6v1h PE=1 SV=1;sp|Q8BVE3|VATH_MOUSE V-type proton ATPas	3	3	3	3	2	1	0	2	2	1	0	2	2	1	0	2	9.8	9.8	9.8	50.811	441	441;465;483	0	11.877	By MS/MS	By MS/MS		By MS/MS	0.20818	0.26611	166.77	5	5	Median	0.2969	NaN	NaN	0.44291	0.4136	NaN	NaN	0.56614
A0A0A6YWP9;A0A0A6YXY0;Q9CQ79	A0A0A6YWP9;A0A0A6YXY0;Q9CQ79	2;2;2	2;2;2	2;2;2	Thioredoxin domain-containing protein 9	Txndc9	tr|A0A0A6YWP9|A0A0A6YWP9_MOUSE Thioredoxin domain-containing protein 9 (Fragment) OS=Mus musculus OX=10090 GN=Txndc9 PE=1 SV=1;tr|A0A0A6YXY0|A0A0A6YXY0_MOUSE Thioredoxin domain-containing protein 9 OS=Mus musculus OX=10090 GN=Txndc9 PE=1 SV=1;sp|Q9CQ79|TXN	3	2	2	2	2	1	1	1	2	1	1	1	2	1	1	1	9.5	9.5	9.5	19.666	169	169;188;226	0	2.9266	By MS/MS	By MS/MS	By MS/MS	By MS/MS	NaN	NaN	NaN	1	1	Median	NaN	NaN	NaN	NaN	NaN	NaN	NaN	NaN
A0A0A6YWU3	A0A0A6YWU3	1	1	1		Ighv6-7	tr|A0A0A6YWU3|A0A0A6YWU3_MOUSE Immunoglobulin heavy variable V6-7 (Fragment) OS=Mus musculus OX=10090 GN=Ighv6-7 PE=4 SV=1	1	1	1	1	0	0	1	0	0	0	1	0	0	0	1	0	13.4	13.4	13.4	13.658	119	119	0.0066351	1.6668			By MS/MS		NaN	NaN	NaN	0	0	Median	NaN	NaN	NaN	NaN	NaN	NaN	NaN	NaN
A0A0A6YXY1;A0A0A6YX97;A2APZ3;Q8R2U4;A2APZ2	A0A0A6YXY1;A0A0A6YX97;A2APZ3;Q8R2U4;A2APZ2	2;2;2;2;1	2;2;2;2;1	2;2;2;2;1	N-terminal Xaa-Pro-Lys N-methyltransferase 1;N-terminal Xaa-Pro-Lys N-methyltransferase 1, N-terminally processed	Ntmt1	tr|A0A0A6YXY1|A0A0A6YXY1_MOUSE N-terminal Xaa-Pro-Lys N-methyltransferase 1 (Fragment) OS=Mus musculus OX=10090 GN=Ntmt1 PE=1 SV=1;tr|A0A0A6YX97|A0A0A6YX97_MOUSE N-terminal Xaa-Pro-Lys N-methyltransferase 1 (Fragment) OS=Mus musculus OX=10090 GN=Ntmt1 PE=1	5	2	2	2	1	2	1	1	1	2	1	1	1	2	1	1	19.5	19.5	19.5	13.305	118	118;144;146;223;78	0	5.365	By MS/MS	By MS/MS	By MS/MS	By MS/MS	NaN	NaN	NaN	0	0	Median	NaN	NaN	NaN	NaN	NaN	NaN	NaN	NaN
A0A0A6YXE4;Q9CZM9	A0A0A6YXE4;Q9CZM9	1;1	1;1	1;1	Calcium-activated potassium channel subunit beta-2	Kcnmb2	tr|A0A0A6YXE4|A0A0A6YXE4_MOUSE Calcium-activated potassium channel subunit beta-2 OS=Mus musculus OX=10090 GN=Kcnmb2 PE=4 SV=1;sp|Q9CZM9|KCMB2_MOUSE Calcium-activated potassium channel subunit beta-2 OS=Mus musculus OX=10090 GN=Kcnmb2 PE=2 SV=1	2	1	1	1	0	0	0	1	0	0	0	1	0	0	0	1	6.1	6.1	6.1	20.835	181	181;235	1	-2				By MS/MS	NaN	NaN	NaN	1	1	Median	NaN	NaN	NaN	NaN	NaN	NaN	NaN	NaN
A0A0B4J1E2;Q9CSN1	A0A0B4J1E2;Q9CSN1	2;2	2;2	2;2	SNW domain-containing protein 1	Snw1	tr|A0A0B4J1E2|A0A0B4J1E2_MOUSE SNW domain-containing protein 1 OS=Mus musculus OX=10090 GN=Snw1 PE=1 SV=1;sp|Q9CSN1|SNW1_MOUSE SNW domain-containing protein 1 OS=Mus musculus OX=10090 GN=Snw1 PE=1 SV=3	2	2	2	2	1	0	1	0	1	0	1	0	1	0	1	0	4.7	4.7	4.7	61.461	536	536;536	0	4.2872	By MS/MS		By MS/MS		NaN	NaN	NaN	1	1	Median	NaN	NaN	NaN	NaN	NaN	NaN	NaN	NaN
A0A0B4J1E7;O35343;D3YTN1	A0A0B4J1E7;O35343;D3YTN1	5;5;3	3;3;1	3;3;1	Importin subunit alpha-3	Kpna4	tr|A0A0B4J1E7|A0A0B4J1E7_MOUSE Importin subunit alpha-3 OS=Mus musculus OX=10090 GN=Kpna4 PE=1 SV=1;sp|O35343|IMA3_MOUSE Importin subunit alpha-3 OS=Mus musculus OX=10090 GN=Kpna4 PE=1 SV=1;tr|D3YTN1|D3YTN1_MOUSE Importin subunit alpha-3 (Fragment) OS=Mus	3	5	3	3	2	1	3	4	0	1	3	3	0	1	3	3	11.6	7.7	7.7	68.03	623	623;521;111	0	7.2878	By matching	By matching	By MS/MS	By MS/MS	0.53822	0.74143	40.177	7	2	Leave out requantified	NaN	NaN	0.86441	0.5652	NaN	NaN	1.2549	0.69284
A0A0G2JDI9;P55096	A0A0G2JDI9;P55096	3;3	3;3	3;3	ATP-binding cassette sub-family D member 3	Abcd3	tr|A0A0G2JDI9|A0A0G2JDI9_MOUSE ATP-binding cassette sub-family D member 3 OS=Mus musculus OX=10090 GN=Abcd3 PE=1 SV=1;sp|P55096|ABCD3_MOUSE ATP-binding cassette sub-family D member 3 OS=Mus musculus OX=10090 GN=Abcd3 PE=1 SV=2	2	3	3	3	0	1	1	2	0	1	1	2	0	1	1	2	7.7	7.7	7.7	62.697	549	549;659	0	5.4921		By MS/MS	By MS/MS	By MS/MS	0.055275	0.06338	25.467	4	4	Median	NaN	NaN	NaN	0.049523	NaN	NaN	NaN	0.058797
A0A0G2JDK2;P17439	A0A0G2JDK2;P17439	1;1	1;1	1;1	Glucosylceramidase	Gba	tr|A0A0G2JDK2|A0A0G2JDK2_MOUSE Glucosylceramidase OS=Mus musculus OX=10090 GN=Gba PE=1 SV=1;sp|P17439|GLCM_MOUSE Glucosylceramidase OS=Mus musculus OX=10090 GN=Gba PE=1 SV=1	2	1	1	1	1	0	0	0	1	0	0	0	1	0	0	0	3.6	3.6	3.6	43.282	388	388;515	0.0057471	1.7243	By MS/MS				NaN	NaN	NaN	1	1	Median	NaN	NaN	NaN	NaN	NaN	NaN	NaN	NaN
A0A0H2UH17;A0A0G2JDV6;Q80X50;A0A0G2JGD0;A0A0G2JG47;A0A0G2JDT1;A0A0G2JE24;A0A0G2JFN7	A0A0H2UH17;A0A0G2JDV6;Q80X50	7;7;7;3;3;2;1;1	7;7;7;3;3;2;1;1	7;7;7;3;3;2;1;1	Ubiquitin-associated protein 2-like	Ubap2l	tr|A0A0H2UH17|A0A0H2UH17_MOUSE Ubiquitin associated protein 2-like, isoform CRA_b OS=Mus musculus OX=10090 GN=Ubap2l PE=1 SV=1;tr|A0A0G2JDV6|A0A0G2JDV6_MOUSE Ubiquitin associated protein 2-like, isoform CRA_g OS=Mus musculus OX=10090 GN=Ubap2l PE=1 SV=1;sp	8	7	7	7	5	6	6	5	5	6	6	5	5	6	6	5	10.9	10.9	10.9	103.94	983	983;1067;1107;81;105;57;50;497	0	25.974	By MS/MS	By MS/MS	By MS/MS	By MS/MS	0.6687	1.0129	41.161	15	3	Leave out requantified	0.69826	0.60955	0.734	0.88267	0.98263	1.0173	1.0677	1.0735
A0A0G2JDV8;Q9DAW9;A0A0G2JFI6;A0A0G2JFC8;A0A0G2JFG3;A0A1L1SRL1;A0A1L1SUB2;A0A1L1SRV0;D3Z7R6;Q08091;Q08093	A0A0G2JDV8;Q9DAW9	8;8;3;1;1;1;1;1;1;1;1	8;8;3;1;1;1;1;1;1;1;1	8;8;3;1;1;1;1;1;1;1;1	Calponin-3	Cnn3	tr|A0A0G2JDV8|A0A0G2JDV8_MOUSE Calponin OS=Mus musculus OX=10090 GN=Cnn3 PE=1 SV=1;sp|Q9DAW9|CNN3_MOUSE Calponin-3 OS=Mus musculus OX=10090 GN=Cnn3 PE=1 SV=1	11	8	8	8	6	7	7	3	6	7	7	3	6	7	7	3	29.9	29.9	29.9	31.395	284	284;330;139;49;50;82;233;238;266;297;305	0	42.715	By MS/MS	By MS/MS	By MS/MS	By MS/MS	0.95036	1.4063	9.8716	15	2	Leave out requantified	0.97972	0.88891	0.9646	1.1266	1.3924	1.4905	1.4019	1.393
A0A0G2JDW7;Q6ZWU9;A0A0G2JG29;A0A0G2JEX7	A0A0G2JDW7;Q6ZWU9;A0A0G2JG29	5;5;3;2	1;1;1;0	1;1;1;0	40S ribosomal protein S27	Rps27	tr|A0A0G2JDW7|A0A0G2JDW7_MOUSE 40S ribosomal protein S27 (Fragment) OS=Mus musculus OX=10090 GN=Rps27 PE=1 SV=1;sp|Q6ZWU9|RS27_MOUSE 40S ribosomal protein S27 OS=Mus musculus OX=10090 GN=Rps27 PE=1 SV=3;tr|A0A0G2JG29|A0A0G2JG29_MOUSE 40S ribosomal protein	4	5	1	1	3	5	4	4	1	1	1	1	1	1	1	1	42.7	13.4	13.4	9.2327	82	82;84;83;52	0	8.1188	By MS/MS	By MS/MS	By MS/MS	By MS/MS	0.69042	1.0063	4.7129	7	0	Median	0.73211	0.60994	0.68128	NaN	1.0324	1.0236	0.99287	NaN
A0A1W2P6X1;E9QKG6;A0A0G2JDZ9;E9Q804;Q99NH0	A0A1W2P6X1;E9QKG6;A0A0G2JDZ9;E9Q804;Q99NH0	1;1;1;1;1	1;1;1;1;1	1;1;1;1;1	Ankyrin repeat domain-containing protein 17	Ankrd17	tr|A0A1W2P6X1|A0A1W2P6X1_MOUSE Ankyrin repeat domain-containing protein 17 OS=Mus musculus OX=10090 GN=Ankrd17 PE=1 SV=1;tr|E9QKG6|E9QKG6_MOUSE Ankyrin repeat domain-containing protein 17 OS=Mus musculus OX=10090 GN=Ankrd17 PE=1 SV=1;tr|A0A0G2JDZ9|A0A0G2JD	5	1	1	1	1	0	0	0	1	0	0	0	1	0	0	0	0.6	0.6	0.6	170.43	1600	1600;2352;2494;2602;2603	0	2.8538	By MS/MS				NaN	NaN	NaN	1	1	Median	NaN	NaN	NaN	NaN	NaN	NaN	NaN	NaN
A0A0G2JFP5;A0A0G2JE08;A0A0G2JFE0;A0A0G2JFB2;Q80VL1	A0A0G2JFP5;A0A0G2JE08;A0A0G2JFE0;A0A0G2JFB2;Q80VL1	1;1;1;1;1	1;1;1;1;1	1;1;1;1;1	Tudor and KH domain-containing protein	Tdrkh	tr|A0A0G2JFP5|A0A0G2JFP5_MOUSE Tudor and KH domain-containing protein OS=Mus musculus OX=10090 GN=Tdrkh PE=1 SV=1;tr|A0A0G2JE08|A0A0G2JE08_MOUSE Tudor and KH domain-containing protein OS=Mus musculus OX=10090 GN=Tdrkh PE=1 SV=1;tr|A0A0G2JFE0|A0A0G2JFE0_MOU	5	1	1	1	0	1	1	0	0	1	1	0	0	1	1	0	8.6	8.6	8.6	16.007	140	140;296;515;556;560	0	4.2644		By MS/MS	By MS/MS		0.75433	0.86853	6.928	2	2	Median	NaN	NaN	NaN	NaN	NaN	NaN	NaN	NaN
A0A0G2JE32;A0A0G2JGL0;P62838;P61079;P61080;Q6ZWY6	A0A0G2JE32;A0A0G2JGL0;P62838;P61079;P61080;Q6ZWY6	2;2;2;2;1;1	2;2;2;2;1;1	2;2;2;2;1;1	Ubiquitin-conjugating enzyme E2 D2;Ubiquitin-conjugating enzyme E2 D3;Ubiquitin-conjugating enzyme E2 D1;Ubiquitin-conjugating enzyme E2 D2B	Ube2d2;Ube2d3;Ube2d1;Ube2d2b	tr|A0A0G2JE32|A0A0G2JE32_MOUSE Ubiquitin-conjugating enzyme E2 D3 (Fragment) OS=Mus musculus OX=10090 GN=Ube2d3 PE=1 SV=1;tr|A0A0G2JGL0|A0A0G2JGL0_MOUSE Ubiquitin-conjugating enzyme E2 D3 OS=Mus musculus OX=10090 GN=Ube2d3 PE=1 SV=1;sp|P62838|UB2D2_MOUSE U	6	2	2	2	1	1	2	0	1	1	2	0	1	1	2	0	22	22	22	14.731	132	132;148;147;147;147;147	0	5.2108	By MS/MS	By MS/MS	By MS/MS		0.90651	1.261	24.14	4	0	Leave out requantified	NaN	NaN	0.91609	NaN	NaN	NaN	1.1637	NaN
A0A0G2JEK2;P63254	A0A0G2JEK2;P63254	1;1	1;1	1;1	Cysteine-rich protein 1	Crip1	tr|A0A0G2JEK2|A0A0G2JEK2_MOUSE Cysteine-rich protein 1 OS=Mus musculus OX=10090 GN=Crip1 PE=1 SV=1;sp|P63254|CRIP1_MOUSE Cysteine-rich protein 1 OS=Mus musculus OX=10090 GN=Crip1 PE=1 SV=2	2	1	1	1	1	1	1	1	1	1	1	1	1	1	1	1	7	7	7	13.582	128	128;77	0.0097674	1.5445	By matching	By MS/MS	By matching	By MS/MS	1.0297	1.5135	20.265	5	1	Median	NaN	1.1225	NaN	NaN	NaN	1.894	NaN	NaN
A0A0G2JF16;Q8R344	A0A0G2JF16;Q8R344	1;1	1;1	1;1	Coiled-coil domain-containing protein 12	Ccdc12	tr|A0A0G2JF16|A0A0G2JF16_MOUSE Coiled-coil domain-containing protein 12 (Fragment) OS=Mus musculus OX=10090 GN=Ccdc12 PE=1 SV=1;sp|Q8R344|CCD12_MOUSE Coiled-coil domain-containing protein 12 OS=Mus musculus OX=10090 GN=Ccdc12 PE=1 SV=2	2	1	1	1	1	0	0	0	1	0	0	0	1	0	0	0	11.3	11.3	11.3	15.932	142	142;166	0	3.0874	By MS/MS				NaN	NaN	NaN	1	1	Median	NaN	NaN	NaN	NaN	NaN	NaN	NaN	NaN
D3YVI5;A0A0G2JF52;Q9R0Q6	D3YVI5;A0A0G2JF52;Q9R0Q6	1;1;1	1;1;1	1;1;1	Actin-related protein 2/3 complex subunit 1A	Arpc1a	tr|D3YVI5|D3YVI5_MOUSE Actin-related protein 2/3 complex subunit 1A (Fragment) OS=Mus musculus OX=10090 GN=Arpc1a PE=1 SV=1;tr|A0A0G2JF52|A0A0G2JF52_MOUSE Actin related protein 2/3 complex, subunit 1A, isoform CRA_b OS=Mus musculus OX=10090 GN=Arpc1a PE=1	3	1	1	1	0	1	1	0	0	1	1	0	0	1	1	0	12.6	12.6	12.6	15.613	135	135;262;370	0	3.2114		By MS/MS	By MS/MS		0.23126	0.26627	16.574	2	1	Median	NaN	NaN	NaN	NaN	NaN	NaN	NaN	NaN
A0A0G2JGZ2;A0A0G2JFR0;Q3TP97;E9Q7H6;Q922A3;Q3UQ84	A0A0G2JGZ2;A0A0G2JFR0;Q3TP97;E9Q7H6;Q922A3;Q3UQ84	1;1;1;1;1;1	1;1;1;1;1;1	1;1;1;1;1;1	Threonine--tRNA ligase, mitochondrial	Tars2	tr|A0A0G2JGZ2|A0A0G2JGZ2_MOUSE Threonine--tRNA ligase, mitochondrial (Fragment) OS=Mus musculus OX=10090 GN=Tars2 PE=1 SV=1;tr|A0A0G2JFR0|A0A0G2JFR0_MOUSE Threonine--tRNA ligase, mitochondrial (Fragment) OS=Mus musculus OX=10090 GN=Tars2 PE=1 SV=1;tr|Q3TP9	6	1	1	1	1	1	0	1	1	1	0	1	1	1	0	1	9.6	9.6	9.6	11.903	104	104;142;423;642;697;723	0	3.0942	By MS/MS	By MS/MS		By MS/MS	NaN	NaN	NaN	0	0	Median	NaN	NaN	NaN	NaN	NaN	NaN	NaN	NaN
A0A0G2JFT8;D6RET4;D3Z4D2;Q8BR30;Q9D394;Q8R4C2;Q8BIJ7	A0A0G2JFT8;D6RET4;D3Z4D2;Q8BR30;Q9D394;Q8R4C2;Q8BIJ7	2;1;1;1;1;1;1	2;1;1;1;1;1;1	2;1;1;1;1;1;1	Protein RUFY3;RUN and FYVE domain-containing protein 2;RUN and FYVE domain-containing protein 1	Rufy2;Rufy3;Rufy1	tr|A0A0G2JFT8|A0A0G2JFT8_MOUSE Protein RUFY3 OS=Mus musculus OX=10090 GN=Rufy3 PE=1 SV=1;tr|D6RET4|D6RET4_MOUSE RUN and FYVE domain-containing protein 2 OS=Mus musculus OX=10090 GN=Rufy2 PE=1 SV=1;tr|D3Z4D2|D3Z4D2_MOUSE RUN and FYVE domain-containing prote	7	2	2	2	1	1	1	0	1	1	1	0	1	1	1	0	5.1	5.1	5.1	74.769	669	669;217;403;437;469;606;712	0.0084547	1.5866	By MS/MS	By MS/MS	By matching		0.78018	1.1994	151.54	3	1	Median	NaN	NaN	NaN	NaN	NaN	NaN	NaN	NaN
A0A0G2JFT9;H6TMF5;P68181	A0A0G2JFT9;H6TMF5;P68181	3;3;3	3;3;3	2;2;2	cAMP-dependent protein kinase catalytic subunit beta	Prkacb	tr|A0A0G2JFT9|A0A0G2JFT9_MOUSE cAMP-dependent protein kinase catalytic subunit beta (Fragment) OS=Mus musculus OX=10090 GN=Prkacb PE=1 SV=1;tr|H6TMF5|H6TMF5_MOUSE cAMP-dependent protein kinase catalytic subunit beta (Fragment) OS=Mus musculus OX=10090 GN=P	3	3	3	2	2	2	2	3	2	2	2	3	1	2	2	2	20.8	20.8	12.3	12.684	106	106;189;351	0	7.8612	By MS/MS	By MS/MS	By MS/MS	By MS/MS	1.3168	1.5273	17.913	6	6	Median	1.4537	NaN	NaN	1.079	1.8298	NaN	NaN	1.2495
Q3TUE1;A0A0G2JGW9;A0A0G2JFY5;Q3UUU2;Q91WJ8;A0A0G2JG00;A0A0G2JFK2;A0A0G2JG96	Q3TUE1;A0A0G2JGW9;A0A0G2JFY5;Q3UUU2;Q91WJ8;A0A0G2JG00;A0A0G2JFK2	12;12;12;12;12;11;6;2	10;10;10;10;10;10;6;2	9;9;9;9;9;9;5;2	Far upstream element-binding protein 1	Fubp1	tr|Q3TUE1|Q3TUE1_MOUSE Far upstream element-binding protein 1 OS=Mus musculus OX=10090 GN=Fubp1 PE=1 SV=1;tr|A0A0G2JGW9|A0A0G2JGW9_MOUSE Far upstream element-binding protein 1 OS=Mus musculus OX=10090 GN=Fubp1 PE=1 SV=1;tr|A0A0G2JFY5|A0A0G2JFY5_MOUSE Far u	8	12	10	9	6	10	9	6	6	9	7	6	6	9	7	5	18.8	16.5	15.4	67.443	642	642;643;654;700;651;523;306;149	0	32.913	By MS/MS	By MS/MS	By MS/MS	By MS/MS	0.82671	1.2065	13.893	26	20	Leave out requantified	0.7564	0.24347	0.33824	0.68965	1.0583	0.29028	0.37611	0.86451
A0A0G2JG69;A0A0G2JGL2;Q3TQZ7;Q80W82;Q8C9D4;Q80W80;E9QN59;Q9WTU6;Q61831	A0A0G2JG69;A0A0G2JGL2;Q3TQZ7;Q80W82;Q8C9D4;Q80W80;E9QN59;Q9WTU6;Q61831	1;1;1;1;1;1;1;1;1	1;1;1;1;1;1;1;1;1	1;1;1;1;1;1;1;1;1	Mitogen-activated protein kinase;Mitogen-activated protein kinase 9;Mitogen-activated protein kinase 10	Mapk10;Mapk9	tr|A0A0G2JG69|A0A0G2JG69_MOUSE Mitogen-activated protein kinase OS=Mus musculus OX=10090 GN=Mapk10 PE=4 SV=1;tr|A0A0G2JGL2|A0A0G2JGL2_MOUSE Mitogen-activated protein kinase OS=Mus musculus OX=10090 GN=Mapk10 PE=1 SV=1;tr|Q3TQZ7|Q3TQZ7_MOUSE Mitogen-activat	9	1	1	1	0	1	0	1	0	1	0	1	0	1	0	1	7.3	7.3	7.3	20.38	178	178;252;418;422;464;464;494;423;464	0	3.1769		By MS/MS		By MS/MS	0.67328	0.96668	13.939	2	0	Median	NaN	NaN	NaN	NaN	NaN	NaN	NaN	NaN
A0A0G2JGJ1;Q8BVI4;D3YWR7;A0A0G2JGY0;D3Z1A1;D3Z099	A0A0G2JGJ1;Q8BVI4;D3YWR7;A0A0G2JGY0;D3Z1A1	7;7;5;4;4;3	7;7;5;4;4;3	7;7;5;4;4;3	Dihydropteridine reductase	Qdpr	tr|A0A0G2JGJ1|A0A0G2JGJ1_MOUSE Dihydropteridine reductase OS=Mus musculus OX=10090 GN=Qdpr PE=1 SV=1;sp|Q8BVI4|DHPR_MOUSE Dihydropteridine reductase OS=Mus musculus OX=10090 GN=Qdpr PE=1 SV=2;tr|D3YWR7|D3YWR7_MOUSE Dihydropteridine reductase OS=Mus musculu	6	7	7	7	3	5	3	5	3	5	3	5	3	5	3	5	43.7	43.7	43.7	22.346	213	213;241;189;139;159;136	0	42.684	By MS/MS	By MS/MS	By MS/MS	By MS/MS	0.65865	1.0239	7.6484	18	9	Leave out requantified	0.84588	0.62214	0.70764	0.78254	1.0811	1.0447	1.0263	0.96182
A0A0G2JGL8;Q99PU8	A0A0G2JGL8;Q99PU8	1;1	1;1	1;1	Putative ATP-dependent RNA helicase DHX30	Dhx30	tr|A0A0G2JGL8|A0A0G2JGL8_MOUSE Putative ATP-dependent RNA helicase DHX30 OS=Mus musculus OX=10090 GN=Dhx30 PE=1 SV=1;sp|Q99PU8|DHX30_MOUSE Putative ATP-dependent RNA helicase DHX30 OS=Mus musculus OX=10090 GN=Dhx30 PE=1 SV=1	2	1	1	1	0	0	0	1	0	0	0	1	0	0	0	1	0.7	0.7	0.7	133.03	1186	1186;1217	0.0025432	2.1174				By MS/MS	NaN	NaN	NaN	1	1	Median	NaN	NaN	NaN	NaN	NaN	NaN	NaN	NaN
A0A0G2JGQ4;P54729	A0A0G2JGQ4;P54729	5;5	5;5	5;5	NEDD8 ultimate buster 1	Nub1	tr|A0A0G2JGQ4|A0A0G2JGQ4_MOUSE NEDD8 ultimate buster 1 OS=Mus musculus OX=10090 GN=Nub1 PE=1 SV=1;sp|P54729|NUB1_MOUSE NEDD8 ultimate buster 1 OS=Mus musculus OX=10090 GN=Nub1 PE=1 SV=2	2	5	5	5	2	1	3	3	2	1	3	3	2	1	3	3	8.6	8.6	8.6	73.116	638	638;614	0	10.467	By MS/MS	By matching	By MS/MS	By MS/MS	0.40897	0.68299	87.39	5	2	Median	NaN	NaN	0.33052	NaN	NaN	NaN	0.41261	NaN
A0A0G2JGS0;Q8R1D8;D3Z3K5;D3Z2Q3;Q9JIQ3	A0A0G2JGS0;Q8R1D8;D3Z3K5;D3Z2Q3;Q9JIQ3	1;1;1;1;1	1;1;1;1;1	1;1;1;1;1	Diablo homolog, mitochondrial	Diablo	tr|A0A0G2JGS0|A0A0G2JGS0_MOUSE Diablo homolog, mitochondrial OS=Mus musculus OX=10090 GN=Diablo PE=1 SV=1;tr|Q8R1D8|Q8R1D8_MOUSE Diablo homolog, mitochondrial OS=Mus musculus OX=10090 GN=Diablo PE=1 SV=1;tr|D3Z3K5|D3Z3K5_MOUSE Diablo homolog, mitochondrial	5	1	1	1	0	0	1	0	0	0	1	0	0	0	1	0	8.6	8.6	8.6	13.38	116	116;157;174;174;237	0.0025471	2.131			By MS/MS		NaN	NaN	NaN	1	1	Median	NaN	NaN	NaN	NaN	NaN	NaN	NaN	NaN
E9QAJ4;D6RDQ8;Q8CCM0;E9Q1V9;E9Q1W0;E9Q1T1;A0A0G2JGS4;Q6PHZ2	E9QAJ4;D6RDQ8;Q8CCM0;E9Q1V9;E9Q1W0;E9Q1T1;A0A0G2JGS4;Q6PHZ2	1;1;1;1;1;1;1;1	1;1;1;1;1;1;1;1	1;1;1;1;1;1;1;1	Calcium/calmodulin-dependent protein kinase type II subunit delta	Camk2d	tr|E9QAJ4|E9QAJ4_MOUSE Calcium/calmodulin-dependent protein kinase type II subunit delta OS=Mus musculus OX=10090 GN=Camk2d PE=1 SV=1;tr|D6RDQ8|D6RDQ8_MOUSE Calcium/calmodulin-dependent protein kinase type II subunit delta OS=Mus musculus OX=10090 GN=Camk2	8	1	1	1	1	0	0	1	1	0	0	1	1	0	0	1	9.2	9.2	9.2	16.315	142	142;147;361;488;512;533;533;499	0.0025654	2.1823	By MS/MS			By MS/MS	1.1715	1.5336	16.057	2	2	Median	NaN	NaN	NaN	NaN	NaN	NaN	NaN	NaN
A0A0G2JH04;P63073;A0A0G2JFB4;A0A0G2JGT5;A0A0G2JG98	A0A0G2JH04;P63073;A0A0G2JFB4;A0A0G2JGT5	5;5;4;4;1	5;5;4;4;1	5;5;4;4;1	Eukaryotic translation initiation factor 4E	Eif4e	tr|A0A0G2JH04|A0A0G2JH04_MOUSE Eukaryotic translation initiation factor 4E OS=Mus musculus OX=10090 GN=Eif4e PE=1 SV=1;sp|P63073|IF4E_MOUSE Eukaryotic translation initiation factor 4E OS=Mus musculus OX=10090 GN=Eif4e PE=1 SV=1;tr|A0A0G2JFB4|A0A0G2JFB4_MOU	5	5	5	5	2	5	5	2	2	5	5	2	2	5	5	2	35.7	35.7	35.7	21.009	185	185;217;132;183;79	0	13.692	By MS/MS	By MS/MS	By MS/MS	By MS/MS	0.69594	1.0893	8.516	13	6	Leave out requantified	0.91625	0.65268	0.71524	1.0499	1.289	1.1306	1.0495	1.2871
Q3U6F1;E9Q7W0;A0A0J9YTV5;P31266	Q3U6F1;E9Q7W0;A0A0J9YTV5;P31266	1;1;1;1	1;1;1;1	1;1;1;1	Recombining binding protein suppressor of hairless	Rbpj	tr|Q3U6F1|Q3U6F1_MOUSE Recombining-binding protein suppressor of hairless OS=Mus musculus OX=10090 GN=Rbpj PE=1 SV=1;tr|E9Q7W0|E9Q7W0_MOUSE Recombining-binding protein suppressor of hairless OS=Mus musculus OX=10090 GN=Rbpj PE=1 SV=1;tr|A0A0J9YTV5|A0A0J9YT	4	1	1	1	0	0	0	1	0	0	0	1	0	0	0	1	2.4	2.4	2.4	51.926	465	465;485;507;526	0.0043689	1.8098				By MS/MS	NaN	NaN	NaN	0	0	Median	NaN	NaN	NaN	NaN	NaN	NaN	NaN	NaN
A0A0J9YTY0;A0A0J9YUL3;Q8C1B7;A0A0J9YUV6;A0A0J9YVA6;B7ZC46;B1AQY9;B1AQZ0;Q8CHH9;A2A3W1	A0A0J9YTY0;A0A0J9YUL3;Q8C1B7	7;7;7;3;3;3;3;3;3;1	7;7;7;3;3;3;3;3;3;1	3;3;3;2;2;0;0;0;0;0	Septin-11	2022-09-11	tr|A0A0J9YTY0|A0A0J9YTY0_MOUSE Septin-11 OS=Mus musculus OX=10090 GN=Sept11 PE=1 SV=1;tr|A0A0J9YUL3|A0A0J9YUL3_MOUSE Septin 11, isoform CRA_b OS=Mus musculus OX=10090 GN=Sept11 PE=1 SV=1;sp|Q8C1B7|SEP11_MOUSE Septin-11 OS=Mus musculus OX=10090 GN=Sept11 PE	10	7	7	3	4	6	5	6	4	6	5	6	2	3	2	3	18.1	18.1	10.4	48.978	425	425;432;431;97;204;440;442;484;429;141	0	18.026	By MS/MS	By MS/MS	By MS/MS	By MS/MS	0.79594	1.2714	7.9772	19	12	Leave out requantified	0.48233	0.6759	0.75499	0.62928	0.6719	1.1852	1.0943	0.78887
A0A0J9YUR5;A0A0J9YUM4;A0A0J9YU62;O88712;A0A0J9YVI3;A0A0J9YVC3;A0A0J9YU66;E9Q0T4;A0A0J9YTW3	A0A0J9YUR5;A0A0J9YUM4;A0A0J9YU62;O88712;A0A0J9YVI3	3;3;3;3;2;1;1;1;1	3;3;3;3;2;1;1;1;1	2;2;2;2;1;0;0;0;1	C-terminal-binding protein 1	Ctbp1	tr|A0A0J9YUR5|A0A0J9YUR5_MOUSE C-terminal-binding protein 1 (Fragment) OS=Mus musculus OX=10090 GN=Ctbp1 PE=1 SV=1;tr|A0A0J9YUM4|A0A0J9YUM4_MOUSE C-terminal-binding protein 1 OS=Mus musculus OX=10090 GN=Ctbp1 PE=1 SV=1;tr|A0A0J9YU62|A0A0J9YU62_MOUSE C-term	9	3	3	2	0	2	2	2	0	2	2	2	0	1	2	1	32.5	32.5	24.8	12.659	117	117;337;429;441;85;31;77;176;180	0	6.235		By MS/MS	By MS/MS	By MS/MS	0.99658	1.3448	188.04	5	2	Median	NaN	0.20452	NaN	0.20423	NaN	0.29107	NaN	0.25561
A0A0J9YU67;F8WJA5;Q61474;A0A0J9YTX9	A0A0J9YU67;F8WJA5;Q61474;A0A0J9YTX9	2;2;2;1	2;2;2;1	2;2;2;1	RNA-binding protein Musashi homolog 1	Msi1	tr|A0A0J9YU67|A0A0J9YU67_MOUSE RNA-binding protein Musashi homolog 1 (Fragment) OS=Mus musculus OX=10090 GN=Msi1 PE=1 SV=1;tr|F8WJA5|F8WJA5_MOUSE RNA-binding protein Musashi homolog 1 (Fragment) OS=Mus musculus OX=10090 GN=Msi1 PE=1 SV=1;sp|Q61474|MSI1H_MO	4	2	2	2	0	1	2	0	0	1	2	0	0	1	2	0	9.3	9.3	9.3	29.383	269	269;325;362;196	0	5.382		By MS/MS	By MS/MS		0.53209	0.88008	21.768	3	2	Median	NaN	NaN	0.59642	NaN	NaN	NaN	0.84071	NaN
B9EJ54;A0A0J9YUD5	B9EJ54;A0A0J9YUD5	1;1	1;1	1;1		Nup205	tr|B9EJ54|B9EJ54_MOUSE MCG21756, isoform CRA_b OS=Mus musculus OX=10090 GN=Nup205 PE=1 SV=1;tr|A0A0J9YUD5|A0A0J9YUD5_MOUSE Nucleoporin 205 OS=Mus musculus OX=10090 GN=Nup205 PE=1 SV=1	2	1	1	1	0	0	1	1	0	0	1	1	0	0	1	1	0.4	0.4	0.4	227.46	2008	2008;2061	1	-2			By MS/MS	By MS/MS	NaN	NaN	NaN	0	0	Median	NaN	NaN	NaN	NaN	NaN	NaN	NaN	NaN
A0A0J9YUD8;A0A0J9YUZ4;P63158;D3YZ18;D3YVC6	A0A0J9YUD8;A0A0J9YUZ4;P63158;D3YZ18	12;12;12;7;5	12;12;12;7;5	11;11;11;6;4	High mobility group protein B1	Hmgb1	tr|A0A0J9YUD8|A0A0J9YUD8_MOUSE High mobility group protein B1 OS=Mus musculus OX=10090 GN=Hmgb1 PE=1 SV=1;tr|A0A0J9YUZ4|A0A0J9YUZ4_MOUSE High mobility group protein B1 (Fragment) OS=Mus musculus OX=10090 GN=Hmgb1 PE=1 SV=1;sp|P63158|HMGB1_MOUSE High mobili	5	12	12	11	10	12	12	8	10	12	12	8	9	11	11	7	51.5	51.5	44.4	19.774	171	171;211;215;124;92	0	90.683	By MS/MS	By MS/MS	By MS/MS	By MS/MS	0.79287	1.2842	7.8986	66	9	Leave out requantified	0.85198	0.73047	0.80195	1.0816	1.2944	1.2711	1.2248	1.3628
A0A0J9YUE9;A0A0J9YUN4;P39053;D6RH60;G3UXX2	A0A0J9YUE9;A0A0J9YUN4;P39053	5;5;5;1;1	2;2;2;1;0	2;2;2;1;0	Dynamin-1	Dnm1	tr|A0A0J9YUE9|A0A0J9YUE9_MOUSE Dynamin-1 OS=Mus musculus OX=10090 GN=Dnm1 PE=1 SV=1;tr|A0A0J9YUN4|A0A0J9YUN4_MOUSE Dynamin-1 OS=Mus musculus OX=10090 GN=Dnm1 PE=1 SV=1;sp|P39053|DYN1_MOUSE Dynamin-1 OS=Mus musculus OX=10090 GN=Dnm1 PE=1 SV=2	5	5	2	2	3	2	2	2	1	1	1	0	1	1	1	0	7.4	3.6	3.6	94.032	835	835;864;867;59;248	0	6.3589	By MS/MS	By MS/MS	By MS/MS	By matching	NaN	NaN	NaN	1	0	Median	NaN	NaN	NaN	NaN	NaN	NaN	NaN	NaN
A0A0J9YUG2	A0A0J9YUG2	3	1	1			tr|A0A0J9YUG2|A0A0J9YUG2_MOUSE Serine/threonine-protein phosphatase PP1-beta catalytic subunit OS=Mus musculus OX=10090 GN=Ppp1cb PE=1 SV=1	1	3	1	1	3	3	2	1	1	1	1	0	1	1	1	0	72.9	16.9	16.9	6.5865	59	59	1	-2	By matching	By MS/MS	By matching	By matching	0.70158	0.99643	7.4823	3	0	Median	NaN	NaN	NaN	NaN	NaN	NaN	NaN	NaN
A0A0J9YUH6;A0A0J9YV27;Q9D1M1;P97304	A0A0J9YUH6;A0A0J9YV27;Q9D1M1;P97304	1;1;1;1	1;1;1;1	1;1;1;1	DNA-directed RNA polymerases I and III subunit RPAC2	Polr1d	tr|A0A0J9YUH6|A0A0J9YUH6_MOUSE DNA-directed RNA polymerases I and III subunit RPAC2 OS=Mus musculus OX=10090 GN=Polr1d PE=1 SV=1;tr|A0A0J9YV27|A0A0J9YV27_MOUSE DNA-directed RNA polymerases I and III subunit RPAC2 OS=Mus musculus OX=10090 GN=Polr1d PE=1 SV=	4	1	1	1	0	0	0	1	0	0	0	1	0	0	0	1	30.3	30.3	30.3	3.7913	33	33;42;126;133	1	-2				By MS/MS	NaN	NaN	NaN	0	0	Median	NaN	NaN	NaN	NaN	NaN	NaN	NaN	NaN
A0A0J9YV20;A0A0R4J0B7;Q80UZ2	A0A0J9YV20;A0A0R4J0B7;Q80UZ2	1;1;1	1;1;1	1;1;1	Protein SDA1 homolog	Sdad1	tr|A0A0J9YV20|A0A0J9YV20_MOUSE Protein SDA1 homolog OS=Mus musculus OX=10090 GN=Sdad1 PE=1 SV=1;tr|A0A0R4J0B7|A0A0R4J0B7_MOUSE Protein SDA1 homolog OS=Mus musculus OX=10090 GN=Sdad1 PE=1 SV=1;sp|Q80UZ2|SDA1_MOUSE Protein SDA1 homolog OS=Mus musculus OX=100	3	1	1	1	0	1	1	1	0	1	1	1	0	1	1	1	1	1	1	79.458	686	686;687;687	0.0084467	1.5807		By MS/MS	By MS/MS	By MS/MS	NaN	NaN	NaN	0	0	Median	NaN	NaN	NaN	NaN	NaN	NaN	NaN	NaN
D3Z1S0;A0A0J9YV40;Q3V2L1;P97440	D3Z1S0;A0A0J9YV40;Q3V2L1;P97440	1;1;1;1	1;1;1;1	1;1;1;1	Histone RNA hairpin-binding protein	Slbp	tr|D3Z1S0|D3Z1S0_MOUSE Histone RNA hairpin-binding protein (Fragment) OS=Mus musculus OX=10090 GN=Slbp PE=4 SV=8;tr|A0A0J9YV40|A0A0J9YV40_MOUSE Histone RNA hairpin-binding protein OS=Mus musculus OX=10090 GN=Slbp PE=1 SV=1;tr|Q3V2L1|Q3V2L1_MOUSE Histone RN	4	1	1	1	1	0	1	1	1	0	1	1	1	0	1	1	24.2	24.2	24.2	3.8994	33	33;219;250;275	0.0057143	1.6914	By MS/MS		By MS/MS	By MS/MS	NaN	NaN	NaN	1	1	Median	NaN	NaN	NaN	NaN	NaN	NaN	NaN	NaN
A0A0J9YVG0;Q61074;A0A0J9YV96	A0A0J9YVG0;Q61074	8;8;1	8;8;1	8;8;1	Protein phosphatase 1G	Ppm1g	tr|A0A0J9YVG0|A0A0J9YVG0_MOUSE Protein phosphatase 1G OS=Mus musculus OX=10090 GN=Ppm1g PE=1 SV=1;sp|Q61074|PPM1G_MOUSE Protein phosphatase 1G OS=Mus musculus OX=10090 GN=Ppm1g PE=1 SV=3	3	8	8	8	3	4	5	5	3	4	5	5	3	4	5	5	20.9	20.9	20.9	47.802	435	435;542;194	0	22.267	By MS/MS	By MS/MS	By MS/MS	By MS/MS	0.75553	1.0445	109.48	13	10	Median	0.88673	0.50594	0.40082	0.88583	1.244	0.60319	0.48447	1.0897
A0A0M3HEP3;Q99M04	A0A0M3HEP3;Q99M04	1;1	1;1	1;1	Lipoyl synthase, mitochondrial	Lias	tr|A0A0M3HEP3|A0A0M3HEP3_MOUSE Lipoyl synthase, mitochondrial OS=Mus musculus OX=10090 GN=Lias PE=1 SV=1;sp|Q99M04|LIAS_MOUSE Lipoyl synthase, mitochondrial OS=Mus musculus OX=10090 GN=Lias PE=1 SV=1	2	1	1	1	0	0	1	1	0	0	1	1	0	0	1	1	5.9	5.9	5.9	32.173	289	289;373	0.0010764	2.6228			By MS/MS	By MS/MS	NaN	NaN	NaN	1	1	Median	NaN	NaN	NaN	NaN	NaN	NaN	NaN	NaN
A0A0N4SUH4;Q8BKS9	A0A0N4SUH4;Q8BKS9	4;4	4;4	4;4	Pumilio domain-containing protein KIAA0020	Kiaa0020	tr|A0A0N4SUH4|A0A0N4SUH4_MOUSE Pumilio homolog 3 OS=Mus musculus OX=10090 GN=Pum3 PE=1 SV=1;sp|Q8BKS9|PUM3_MOUSE Pumilio homolog 3 OS=Mus musculus OX=10090 GN=Pum3 PE=1 SV=2	2	4	4	4	2	1	1	3	2	1	1	3	2	1	1	3	8.3	8.3	8.3	72.93	648	648;647	0	17.954	By MS/MS	By MS/MS	By MS/MS	By MS/MS	0.58491	0.75929	16.517	6	3	Median	0.58569	NaN	NaN	0.61172	0.82097	NaN	NaN	0.74825
A0A0N4SUV6;Q9JHW4	A0A0N4SUV6;Q9JHW4	1;1	1;1	1;1	Selenocysteine-specific elongation factor	Eefsec	tr|A0A0N4SUV6|A0A0N4SUV6_MOUSE Selenocysteine-specific elongation factor OS=Mus musculus OX=10090 GN=Eefsec PE=1 SV=1;sp|Q9JHW4|SELB_MOUSE Selenocysteine-specific elongation factor OS=Mus musculus OX=10090 GN=Eefsec PE=1 SV=2	2	1	1	1	0	0	1	1	0	0	1	1	0	0	1	1	2.1	2.1	2.1	58.016	534	534;583	0	2.8248			By MS/MS	By MS/MS	NaN	NaN	NaN	1	1	Median	NaN	NaN	NaN	NaN	NaN	NaN	NaN	NaN
A0A0N4SVW1;A0A0N4SUV7;Q91YP3;A0A0N4SUT8;A0A0N4SVH5;A0A0N4SV34	A0A0N4SVW1;A0A0N4SUV7;Q91YP3;A0A0N4SUT8;A0A0N4SVH5;A0A0N4SV34	2;2;2;1;1;1	2;2;2;1;1;1	2;2;2;1;1;1	Deoxyribose-phosphate aldolase	Dera	tr|A0A0N4SVW1|A0A0N4SVW1_MOUSE Deoxyribose-phosphate aldolase OS=Mus musculus OX=10090 GN=Dera PE=1 SV=1;tr|A0A0N4SUV7|A0A0N4SUV7_MOUSE Deoxyribose-phosphate aldolase (Fragment) OS=Mus musculus OX=10090 GN=Dera PE=1 SV=1;sp|Q91YP3|DEOC_MOUSE Deoxyribose-ph	6	2	2	2	1	1	1	1	1	1	1	1	1	1	1	1	23.3	23.3	23.3	12.915	116	116;152;318;74;96;290	0	6.8122	By MS/MS	By MS/MS	By MS/MS	By MS/MS	0.45144	0.62888	139.91	3	3	Median	NaN	NaN	NaN	NaN	NaN	NaN	NaN	NaN
A0A0N4SV57;A0A0N4SW89;P97429;D3Z0S1;S4R1F2;F7ANV6	A0A0N4SV57;A0A0N4SW89;P97429;D3Z0S1;S4R1F2;F7ANV6	4;4;4;3;2;2	4;4;4;3;2;2	4;4;4;3;2;2	Annexin A4;Annexin	Anxa4	tr|A0A0N4SV57|A0A0N4SV57_MOUSE Annexin (Fragment) OS=Mus musculus OX=10090 GN=Anxa4 PE=1 SV=1;tr|A0A0N4SW89|A0A0N4SW89_MOUSE Annexin (Fragment) OS=Mus musculus OX=10090 GN=Anxa4 PE=1 SV=3;sp|P97429|ANXA4_MOUSE Annexin A4 OS=Mus musculus OX=10090 GN=Anxa4 P	6	4	4	4	2	3	3	2	2	3	3	2	2	3	3	2	19.8	19.8	19.8	29.146	258	258;273;319;254;196;215	0	16.616	By MS/MS	By MS/MS	By MS/MS	By MS/MS	0.080339	0.11192	137.6	7	4	Median	0.23005	NaN	0.231	0.18691	0.3187	NaN	0.29137	0.23337
A0A0N4SV66;C0HKE9;C0HKE8;C0HKE7;C0HKE6;C0HKE5;C0HKE4;C0HKE3;C0HKE2;C0HKE1;Q8CGP6;Q8R1M2;Q8CGP7;Q8CGP5;Q8BFU2;Q8CGP4;Q64523;Q6GSS7;G3UWL7	A0A0N4SV66;C0HKE9;C0HKE8;C0HKE7;C0HKE6;C0HKE5;C0HKE4;C0HKE3;C0HKE2;C0HKE1;Q8CGP6;Q8R1M2;Q8CGP7;Q8CGP5;Q8BFU2;Q8CGP4;Q64523;Q6GSS7	6;6;6;6;6;6;6;6;6;6;6;6;6;6;6;5;5;5;1	6;6;6;6;6;6;6;6;6;6;6;6;6;6;6;5;5;5;1	2;2;2;2;2;2;2;2;2;2;2;2;2;2;2;2;2;2;0	Histone H2A type 1-H;Histone H2A.J;Histone H2A type 1-K;Histone H2A type 1-F;Histone H2A type 3;Histone H2A;Histone H2A type 2-C;Histone H2A type 2-A	Hist1h2ah;H2afj;Hist1h2ak;Hist1h2af;Hist3h2a;Hist1h2aa;Hist2h2ac;Hist2h2aa1	tr|A0A0N4SV66|A0A0N4SV66_MOUSE Histone H2A OS=Mus musculus OX=10090 GN=H2afj PE=1 SV=1;sp|C0HKE9|H2A1P_MOUSE Histone H2A type 1-P OS=Mus musculus OX=10090 GN=Hist1h2ap PE=1 SV=1;sp|C0HKE8|H2A1O_MOUSE Histone H2A type 1-O OS=Mus musculus OX=10090 GN=Hist1h2	19	6	6	2	4	5	5	5	4	5	5	5	1	1	2	2	57.1	57.1	15.9	13.66	126	126;130;130;130;130;130;130;130;130;130;128;129;130;130;130;129;129;130;87	0	16.715	By MS/MS	By MS/MS	By MS/MS	By MS/MS	0.83265	1.1736	1.0872	21	6	Leave out requantified	0.85102	0.65697	0.81425	0.96944	1.1846	1.0705	1.1756	1.1824
A0A0N4SV89;Q5XKN4	A0A0N4SV89;Q5XKN4	1;1	1;1	1;1	Protein jagunal homolog 1	Jagn1	tr|A0A0N4SV89|A0A0N4SV89_MOUSE Protein jagunal homolog 1 OS=Mus musculus OX=10090 GN=Jagn1 PE=1 SV=1;sp|Q5XKN4|JAGN1_MOUSE Protein jagunal homolog 1 OS=Mus musculus OX=10090 GN=Jagn1 PE=1 SV=2	2	1	1	1	0	0	1	0	0	0	1	0	0	0	1	0	17.9	17.9	17.9	7.4441	67	67;183	0.0015658	2.3477			By MS/MS		NaN	NaN	NaN	1	1	Median	NaN	NaN	NaN	NaN	NaN	NaN	NaN	NaN
A0A0N4SVC2;E9QP00;Q6PFR5	A0A0N4SVC2;E9QP00;Q6PFR5	2;2;2	1;1;1	1;1;1	Transformer-2 protein homolog alpha	Tra2a	tr|A0A0N4SVC2|A0A0N4SVC2_MOUSE Transformer-2 protein homolog alpha OS=Mus musculus OX=10090 GN=Tra2a PE=1 SV=1;tr|E9QP00|E9QP00_MOUSE Transformer-2 protein homolog alpha OS=Mus musculus OX=10090 GN=Tra2a PE=1 SV=1;sp|Q6PFR5|TRA2A_MOUSE Transformer-2 protei	3	2	1	1	0	0	1	1	0	0	0	1	0	0	0	1	8.6	5	5	32.259	280	280;282;281	0	3.3568			By matching	By MS/MS	NaN	NaN	NaN	1	1	Median	NaN	NaN	NaN	NaN	NaN	NaN	NaN	NaN
A0A0N4SVK3;P62322	A0A0N4SVK3;P62322	1;1	1;1	1;1	U6 snRNA-associated Sm-like protein LSm5	Lsm5	tr|A0A0N4SVK3|A0A0N4SVK3_MOUSE U6 snRNA-associated Sm-like protein LSm5 OS=Mus musculus OX=10090 GN=Lsm5 PE=1 SV=1;sp|P62322|LSM5_MOUSE U6 snRNA-associated Sm-like protein LSm5 OS=Mus musculus OX=10090 GN=Lsm5 PE=3 SV=2	2	1	1	1	1	1	1	1	1	1	1	1	1	1	1	1	32.2	32.2	32.2	6.6106	59	59;91	0	4.1771	By MS/MS	By MS/MS	By MS/MS	By MS/MS	0.74681	1.0914	3.5142	7	0	Median	NaN	0.66076	0.74294	0.88434	NaN	1.1296	1.087	1.0891
A0A0N4SVS6;P53996;Q9D548	A0A0N4SVS6;P53996	3;3;1	3;3;1	3;3;1	Cellular nucleic acid-binding protein	Cnbp	tr|A0A0N4SVS6|A0A0N4SVS6_MOUSE Cellular nucleic acid-binding protein OS=Mus musculus OX=10090 GN=Cnbp PE=1 SV=1;sp|P53996|CNBP_MOUSE Cellular nucleic acid-binding protein OS=Mus musculus OX=10090 GN=Cnbp PE=1 SV=2	3	3	3	3	2	2	2	2	2	2	2	2	2	2	2	2	14	14	14	18.799	171	171;178;170	0	5.7055	By MS/MS	By MS/MS	By MS/MS	By MS/MS	0.79716	0.98061	87.698	5	1	Linear	NaN	0.24509	NaN	NaN	NaN	0.34792	NaN	NaN
A0A0N4SWC5;F6QKD2;A0A0N4SVT1;Q9CWX9	A0A0N4SWC5;F6QKD2;A0A0N4SVT1;Q9CWX9	2;2;2;2	2;2;2;2	2;2;2;2	Probable ATP-dependent RNA helicase DDX47	Ddx47	tr|A0A0N4SWC5|A0A0N4SWC5_MOUSE Probable ATP-dependent RNA helicase DDX47 (Fragment) OS=Mus musculus OX=10090 GN=Ddx47 PE=1 SV=3;tr|F6QKD2|F6QKD2_MOUSE Probable ATP-dependent RNA helicase DDX47 (Fragment) OS=Mus musculus OX=10090 GN=Ddx47 PE=1 SV=1;tr|A0A0N	4	2	2	2	2	0	1	1	2	0	1	1	2	0	1	1	17.2	17.2	17.2	19.653	180	180;360;380;455	0	3.4198	By MS/MS		By MS/MS	By MS/MS	NaN	NaN	NaN	1	1	Median	NaN	NaN	NaN	NaN	NaN	NaN	NaN	NaN
A0A0N4SVX3;Q99KX1;A0A0N4SVM2	A0A0N4SVX3;Q99KX1;A0A0N4SVM2	2;2;1	2;2;1	2;2;1	Myeloid leukemia factor 2	Mlf2	tr|A0A0N4SVX3|A0A0N4SVX3_MOUSE Myeloid leukemia factor 2 (Fragment) OS=Mus musculus OX=10090 GN=Mlf2 PE=1 SV=1;sp|Q99KX1|MLF2_MOUSE Myeloid leukemia factor 2 OS=Mus musculus OX=10090 GN=Mlf2 PE=1 SV=1;tr|A0A0N4SVM2|A0A0N4SVM2_MOUSE Myeloid leukemia factor	3	2	2	2	0	2	1	0	0	2	1	0	0	2	1	0	38.8	38.8	38.8	12.659	116	116;247;92	0.0015633	2.3349		By MS/MS	By MS/MS		0.21645	0.25805	77.467	3	3	Median	NaN	0.39295	NaN	NaN	NaN	0.44773	NaN	NaN
A0A0N4SW34;A0A0N4SW07;P50518	A0A0N4SW34;A0A0N4SW07;P50518	1;1;1	1;1;1	1;1;1	V-type proton ATPase subunit E 1	Atp6v1e1	tr|A0A0N4SW34|A0A0N4SW34_MOUSE V-type proton ATPase subunit E 1 (Fragment) OS=Mus musculus OX=10090 GN=Atp6v1e1 PE=1 SV=1;tr|A0A0N4SW07|A0A0N4SW07_MOUSE V-type proton ATPase subunit E 1 (Fragment) OS=Mus musculus OX=10090 GN=Atp6v1e1 PE=1 SV=1;sp|P50518|VA	3	1	1	1	1	1	0	1	1	1	0	1	1	1	0	1	16.1	16.1	16.1	10.323	87	87;128;226	0	3.9163	By MS/MS	By MS/MS		By MS/MS	0.93086	1.2141	15.01	3	3	Median	NaN	NaN	NaN	NaN	NaN	NaN	NaN	NaN
A0A0N5E9G7;G3X8Z6;Q5U4B1;G3UWX1;P35601	A0A0N5E9G7;G3X8Z6;Q5U4B1;G3UWX1;P35601	3;3;3;3;3	3;3;3;3;3	3;3;3;3;3	Replication factor C subunit 1	Rfc1	tr|A0A0N5E9G7|A0A0N5E9G7_MOUSE Replication factor C subunit 1 OS=Mus musculus OX=10090 GN=Rfc1 PE=1 SV=1;tr|G3X8Z6|G3X8Z6_MOUSE Replication factor C subunit 1 OS=Mus musculus OX=10090 GN=Rfc1 PE=1 SV=1;tr|Q5U4B1|Q5U4B1_MOUSE Replication factor C subunit 1	5	3	3	3	3	3	2	3	3	3	2	3	3	3	2	3	3.5	3.5	3.5	125.86	1130	1130;1131;1132;1145;1131	0	5.4053	By MS/MS	By MS/MS	By MS/MS	By MS/MS	0.18488	0.22043	121.15	11	7	Median	0.096866	0.17702	0.24261	0.84001	0.13494	0.21105	0.31728	1.0558
A0A0R3P9C8;Q9DC69	A0A0R3P9C8;Q9DC69	3;3	3;3	3;3	NADH dehydrogenase [ubiquinone] 1 alpha subcomplex subunit 9, mitochondrial	Ndufa9	tr|A0A0R3P9C8|A0A0R3P9C8_MOUSE NADH dehydrogenase [ubiquinone] 1 alpha subcomplex subunit 9, mitochondrial OS=Mus musculus OX=10090 GN=Ndufa9 PE=1 SV=1;sp|Q9DC69|NDUA9_MOUSE NADH dehydrogenase [ubiquinone] 1 alpha subcomplex subunit 9, mitochondrial OS=Mus	2	3	3	3	2	1	1	3	2	1	1	3	2	1	1	3	9.4	9.4	9.4	42.121	373	373;377	0	6.9759	By MS/MS	By MS/MS	By MS/MS	By MS/MS	0.24103	0.32163	4.9571	2	2	Median	NaN	NaN	NaN	NaN	NaN	NaN	NaN	NaN
A0A0R4IZW8;O88456;A0A0R4J1C2;Q9D7J7	A0A0R4IZW8;O88456;A0A0R4J1C2	3;3;2;1	3;3;2;1	3;3;2;1	Calpain small subunit 1	Capns1	tr|A0A0R4IZW8|A0A0R4IZW8_MOUSE Calpain small subunit 1 OS=Mus musculus OX=10090 GN=Capns1 PE=1 SV=1;sp|O88456|CPNS1_MOUSE Calpain small subunit 1 OS=Mus musculus OX=10090 GN=Capns1 PE=1 SV=1;tr|A0A0R4J1C2|A0A0R4J1C2_MOUSE Calpain small subunit 1 OS=Mus mus	4	3	3	3	1	3	3	2	1	3	3	2	1	3	3	2	9.7	9.7	9.7	28.406	268	268;269;200;247	0	8.0125	By MS/MS	By MS/MS	By MS/MS	By MS/MS	0.67037	0.99702	5.4394	7	0	Leave out requantified	NaN	0.59821	0.65973	0.86131	NaN	1.0183	0.9435	1.0368
A0A0R4IZX3;Q921D4	A0A0R4IZX3;Q921D4	1;1	1;1	1;1	Mediator of RNA polymerase II transcription subunit 6	Med6	tr|A0A0R4IZX3|A0A0R4IZX3_MOUSE Mediator of RNA polymerase II transcription subunit 6 OS=Mus musculus OX=10090 GN=Med6 PE=1 SV=1;sp|Q921D4|MED6_MOUSE Mediator of RNA polymerase II transcription subunit 6 OS=Mus musculus OX=10090 GN=Med6 PE=1 SV=2	2	1	1	1	1	1	1	1	1	1	1	1	1	1	1	1	4.6	4.6	4.6	22.643	195	195;246	0.0010672	2.5346	By MS/MS	By MS/MS	By MS/MS	By MS/MS	0.7149	0.99968	14.785	11	0	Median	0.75434	0.53736	0.67467	0.79628	1.0533	0.93036	0.97803	0.98058
A0A0R4IZY0;Q8C1A5	A0A0R4IZY0;Q8C1A5	23;23	23;23	23;23	Thimet oligopeptidase	Thop1	tr|A0A0R4IZY0|A0A0R4IZY0_MOUSE Thimet oligopeptidase OS=Mus musculus OX=10090 GN=Thop1 PE=1 SV=1;sp|Q8C1A5|THOP1_MOUSE Thimet oligopeptidase OS=Mus musculus OX=10090 GN=Thop1 PE=1 SV=1	2	23	23	23	15	15	14	14	15	15	14	14	15	15	14	14	32.6	32.6	32.6	78.026	687	687;687	0	82.477	By MS/MS	By MS/MS	By MS/MS	By MS/MS	0.6503	0.95573	24.496	54	24	Leave out requantified	0.67469	0.59816	0.66109	0.74785	0.97012	1.0237	0.9637	0.91997
A0A0R4J005;E9QP62;Q9D7B2;Q99JW4	A0A0R4J005;E9QP62;Q9D7B2;Q99JW4	2;2;2;2	2;2;2;2	2;2;2;2	LIM and senescent cell antigen-like-containing domain protein 1	Lims1	tr|A0A0R4J005|A0A0R4J005_MOUSE LIM and senescent cell antigen-like-containing domain protein OS=Mus musculus OX=10090 GN=Lims1 PE=1 SV=1;tr|E9QP62|E9QP62_MOUSE LIM and senescent cell antigen-like-containing domain protein OS=Mus musculus OX=10090 GN=Lims1	4	2	2	2	1	1	0	0	1	1	0	0	1	1	0	0	7.1	7.1	7.1	38.387	337	337;387;396;325	0.0088785	1.5585	By MS/MS	By MS/MS			NaN	NaN	NaN	1	0	Median	NaN	NaN	NaN	NaN	NaN	NaN	NaN	NaN
A0A0R4J008;P70288;Q8BQ10;D3YYI8;O09106;Q3UM33;O88895	A0A0R4J008;P70288;Q8BQ10;D3YYI8;O09106	5;5;3;3;3;1;1	5;5;3;3;3;1;1	5;5;3;3;3;1;1	Histone deacetylase 2;Histone deacetylase;Histone deacetylase 1	Hdac2;Gm10093;Hdac1	tr|A0A0R4J008|A0A0R4J008_MOUSE Histone deacetylase OS=Mus musculus OX=10090 GN=Hdac2 PE=1 SV=1;sp|P70288|HDAC2_MOUSE Histone deacetylase 2 OS=Mus musculus OX=10090 GN=Hdac2 PE=1 SV=1;tr|Q8BQ10|Q8BQ10_MOUSE Histone deacetylase 2 OS=Mus musculus OX=10090 GN=	7	5	5	5	3	3	3	4	3	3	3	4	3	3	3	4	11.1	11.1	11.1	55.33	488	488;488;304;482;482;428;424	0	11.766	By MS/MS	By MS/MS	By MS/MS	By MS/MS	0.97166	1.3819	9.185	11	6	Leave out requantified	0.91534	0.83178	2.6773	0.44394	1.2403	1.4148	3.9082	0.52707
D3Z765;A0A0R4J047;Q9CYI4	D3Z765;A0A0R4J047;Q9CYI4	4;4;4	1;1;1	1;1;1	Putative RNA-binding protein Luc7-like 1	Luc7l	tr|D3Z765|D3Z765_MOUSE Putative RNA-binding protein Luc7-like 1 (Fragment) OS=Mus musculus OX=10090 GN=Luc7l PE=1 SV=1;tr|A0A0R4J047|A0A0R4J047_MOUSE Luc7 homolog (S. cerevisiae)-like, isoform CRA_c OS=Mus musculus OX=10090 GN=Luc7l PE=1 SV=1;sp|Q9CYI4|LUC	3	4	1	1	4	4	2	4	1	1	1	1	1	1	1	1	22.7	5.2	5.2	20.113	172	172;325;371	0	2.8693	By MS/MS	By MS/MS	By MS/MS	By MS/MS	NaN	NaN	NaN	0	0	Median	NaN	NaN	NaN	NaN	NaN	NaN	NaN	NaN
A0A0R4J049;Q8CIG8;F6QQQ6	A0A0R4J049;Q8CIG8	7;7;3	7;7;3	7;7;3	Protein arginine N-methyltransferase 5	Prmt5	tr|A0A0R4J049|A0A0R4J049_MOUSE Protein arginine N-methyltransferase 5 OS=Mus musculus OX=10090 GN=Prmt5 PE=1 SV=1;sp|Q8CIG8|ANM5_MOUSE Protein arginine N-methyltransferase 5 OS=Mus musculus OX=10090 GN=Prmt5 PE=1 SV=3	3	7	7	7	4	5	2	4	4	5	2	4	4	5	2	4	12.9	12.9	12.9	72.737	637	637;637;203	0	15.06	By MS/MS	By MS/MS	By MS/MS	By MS/MS	0.60568	0.90069	4.7437	12	4	Leave out requantified	0.62812	0.50395	0.13811	0.7384	0.90069	0.90744	0.17414	0.90586
A0A1L1SRW7;A0A0R4J050;Q99JW2;A0A1L1SRL5;A0A1L1SSU4;A0A087WPX1;A0A1L1SRC1;A0A1L1SS90	A0A1L1SRW7;A0A0R4J050;Q99JW2;A0A1L1SRL5;A0A1L1SSU4;A0A087WPX1;A0A1L1SRC1;A0A1L1SS90	2;2;2;1;1;1;1;1	2;2;2;1;1;1;1;1	2;2;2;1;1;1;1;1	Aminoacylase-1	Acy1	tr|A0A1L1SRW7|A0A1L1SRW7_MOUSE Aminoacylase-1 OS=Mus musculus OX=10090 GN=Acy1 PE=1 SV=1;tr|A0A0R4J050|A0A0R4J050_MOUSE Aminoacylase-1 OS=Mus musculus OX=10090 GN=Acy1 PE=1 SV=1;sp|Q99JW2|ACY1_MOUSE Aminoacylase-1 OS=Mus musculus OX=10090 GN=Acy1 PE=1 SV=1	8	2	2	2	1	1	2	0	1	1	2	0	1	1	2	0	6.2	6.2	6.2	37.499	336	336;408;408;155;201;219;343;373	0.0010599	2.463	By matching	By matching	By MS/MS		0.63541	1.002	34.998	5	1	Median	NaN	NaN	0.73219	NaN	NaN	NaN	1.0692	NaN
E9Q2H8;E9PYA3;A0A0R4J052;G5E8T9;Q99KB8	E9Q2H8;E9PYA3;A0A0R4J052;G5E8T9;Q99KB8	1;1;1;1;1	1;1;1;1;1	1;1;1;1;1	Hydroxyacylglutathione hydrolase, mitochondrial	Hagh	tr|E9Q2H8|E9Q2H8_MOUSE Hydroxyacylglutathione hydrolase, mitochondrial (Fragment) OS=Mus musculus OX=10090 GN=Hagh PE=1 SV=1;tr|E9PYA3|E9PYA3_MOUSE Hydroxyacylglutathione hydrolase, mitochondrial (Fragment) OS=Mus musculus OX=10090 GN=Hagh PE=1 SV=1;tr|A0A	5	1	1	1	1	1	0	1	1	1	0	1	1	1	0	1	5.5	5.5	5.5	23.756	217	217;237;260;309;309	0	9.0852	By MS/MS	By MS/MS		By MS/MS	0.59972	0.83841	37.827	4	3	Median	NaN	0.43272	NaN	NaN	NaN	0.72762	NaN	NaN
A0A0R4J078;Q8VCH8	A0A0R4J078;Q8VCH8	2;2	2;2	2;2	UBX domain-containing protein 4	Ubxn4	tr|A0A0R4J078|A0A0R4J078_MOUSE UBX domain containing 2, isoform CRA_a OS=Mus musculus OX=10090 GN=Ubxn4 PE=1 SV=1;sp|Q8VCH8|UBXN4_MOUSE UBX domain-containing protein 4 OS=Mus musculus OX=10090 GN=Ubxn4 PE=1 SV=1	2	2	2	2	0	2	0	0	0	2	0	0	0	2	0	0	5.7	5.7	5.7	56.459	506	506;506	0.0057609	1.7366		By MS/MS			0.59649	1.01	16.456	2	2	Median	NaN	0.59649	NaN	NaN	NaN	1.01	NaN	NaN
A0A0R4J079;Q8BMP6	A0A0R4J079;Q8BMP6	2;2	2;2	2;2	Golgi resident protein GCP60	Acbd3	tr|A0A0R4J079|A0A0R4J079_MOUSE Acyl-Coenzyme A binding domain containing 3, isoform CRA_b OS=Mus musculus OX=10090 GN=Acbd3 PE=1 SV=1;sp|Q8BMP6|GCP60_MOUSE Golgi resident protein GCP60 OS=Mus musculus OX=10090 GN=Acbd3 PE=1 SV=3	2	2	2	2	2	0	1	0	2	0	1	0	2	0	1	0	3.8	3.8	3.8	60.181	525	525;525	0.001569	2.362	By MS/MS		By MS/MS		NaN	NaN	NaN	0	0	Median	NaN	NaN	NaN	NaN	NaN	NaN	NaN	NaN
A0A0R4J083;P51174	A0A0R4J083;P51174	3;3	3;3	3;3	Long-chain specific acyl-CoA dehydrogenase, mitochondrial	Acadl	tr|A0A0R4J083|A0A0R4J083_MOUSE Long-chain-specific acyl-CoA dehydrogenase, mitochondrial OS=Mus musculus OX=10090 GN=Acadl PE=1 SV=1;sp|P51174|ACADL_MOUSE Long-chain specific acyl-CoA dehydrogenase, mitochondrial OS=Mus musculus OX=10090 GN=Acadl PE=1 SV=2	2	3	3	3	1	1	1	2	1	1	1	2	1	1	1	2	7.9	7.9	7.9	47.896	430	430;430	0	5.888	By MS/MS	By MS/MS	By matching	By MS/MS	0.54392	0.85544	75.509	4	1	Median	NaN	NaN	NaN	NaN	NaN	NaN	NaN	NaN
A0A0R4J098;O88291;D3YXQ7;D6RG92	A0A0R4J098;O88291;D3YXQ7	4;4;2;1	4;4;2;1	4;4;2;1	DBIRD complex subunit ZNF326	Znf326;Zfp326	tr|A0A0R4J098|A0A0R4J098_MOUSE Zinc finger protein 326 OS=Mus musculus OX=10090 GN=Zfp326 PE=1 SV=1;sp|O88291|ZN326_MOUSE DBIRD complex subunit ZNF326 OS=Mus musculus OX=10090 GN=Znf326 PE=1 SV=1;tr|D3YXQ7|D3YXQ7_MOUSE Zinc finger protein 326 (Fragment) OS	4	4	4	4	1	2	2	1	1	2	2	1	1	2	2	1	8.1	8.1	8.1	65.166	580	580;580;415;53	0	16.612	By MS/MS	By MS/MS	By MS/MS	By MS/MS	0.92681	1.2371	54.796	4	1	Median	NaN	NaN	0.58671	NaN	NaN	NaN	0.74866	NaN
A0A0R4J0C8;Q7TMF2	A0A0R4J0C8;Q7TMF2	1;1	1;1	1;1	3-5 exoribonuclease 1	Eri1	tr|A0A0R4J0C8|A0A0R4J0C8_MOUSE 3-5 exoribonuclease 1 OS=Mus musculus OX=10090 GN=Eri1 PE=1 SV=1;sp|Q7TMF2|ERI1_MOUSE 3-5 exoribonuclease 1 OS=Mus musculus OX=10090 GN=Eri1 PE=1 SV=2	2	1	1	1	0	1	0	0	0	1	0	0	0	1	0	0	7.8	7.8	7.8	39.551	345	345;345	0.004386	1.8415		By MS/MS			NaN	NaN	NaN	1	1	Median	NaN	NaN	NaN	NaN	NaN	NaN	NaN	NaN
A0A0R4J0F6;Q99KY4	A0A0R4J0F6;Q99KY4	1;1	1;1	1;1	Cyclin-G-associated kinase	Gak	tr|A0A0R4J0F6|A0A0R4J0F6_MOUSE Cyclin-G-associated kinase OS=Mus musculus OX=10090 GN=Gak PE=1 SV=1;sp|Q99KY4|GAK_MOUSE Cyclin-G-associated kinase OS=Mus musculus OX=10090 GN=Gak PE=1 SV=2	2	1	1	1	0	1	0	1	0	1	0	1	0	1	0	1	0.8	0.8	0.8	143.67	1305	1305;1305	0.0035105	2.0181		By matching		By MS/MS	0.34118	0.46463	77.635	2	0	Median	NaN	NaN	NaN	NaN	NaN	NaN	NaN	NaN
A0A0R4J0G0;Q8BH04;A0A2I3BQL9;A0A2I3BS39;A0A2I3BRX1;A0A2I3BQC6;Q9Z2V4	A0A0R4J0G0;Q8BH04;A0A2I3BQL9;A0A2I3BS39;A0A2I3BRX1	14;14;13;11;8;3;1	14;14;13;11;8;3;1	14;14;13;11;8;3;1	Phosphoenolpyruvate carboxykinase [GTP], mitochondrial	Pck2	tr|A0A0R4J0G0|A0A0R4J0G0_MOUSE Phosphoenolpyruvate carboxykinase [GTP], mitochondrial OS=Mus musculus OX=10090 GN=Pck2 PE=1 SV=1;sp|Q8BH04|PCKGM_MOUSE Phosphoenolpyruvate carboxykinase [GTP], mitochondrial OS=Mus musculus OX=10090 GN=Pck2 PE=1 SV=1;tr|A0A2	7	14	14	14	5	9	11	6	5	9	11	6	5	9	11	6	25.6	25.6	25.6	73.417	667	667;640;599;609;489;160;622	0	40.596	By MS/MS	By MS/MS	By MS/MS	By MS/MS	0.66326	0.92931	14.794	27	18	Leave out requantified	0.59277	0.40461	0.26961	0.65754	0.83525	0.48239	0.3393	0.80127
A0A0R4J0H0;A0A0R4J1G7;F8WJ93;Q3UMY5	A0A0R4J0H0;A0A0R4J1G7;F8WJ93;Q3UMY5	2;2;2;2	2;2;2;2	2;2;2;2	Echinoderm microtubule-associated protein-like 4	Eml4	tr|A0A0R4J0H0|A0A0R4J0H0_MOUSE Echinoderm microtubule-associated protein-like 4 OS=Mus musculus OX=10090 GN=Eml4 PE=1 SV=1;tr|A0A0R4J1G7|A0A0R4J1G7_MOUSE Echinoderm microtubule-associated protein-like 4 OS=Mus musculus OX=10090 GN=Eml4 PE=1 SV=1;tr|F8WJ93|	4	2	2	2	0	0	1	1	0	0	1	1	0	0	1	1	2.4	2.4	2.4	97.507	876	876;919;988;988	0.0035	1.9941			By MS/MS	By MS/MS	NaN	NaN	NaN	0	0	Median	NaN	NaN	NaN	NaN	NaN	NaN	NaN	NaN
A0A0R4J0H7;Q8K2Z4	A0A0R4J0H7;Q8K2Z4	6;6	6;6	6;6	Condensin complex subunit 1	Ncapd2	tr|A0A0R4J0H7|A0A0R4J0H7_MOUSE Condensin complex subunit 1 OS=Mus musculus OX=10090 GN=Ncapd2 PE=1 SV=1;sp|Q8K2Z4|CND1_MOUSE Condensin complex subunit 1 OS=Mus musculus OX=10090 GN=Ncapd2 PE=1 SV=2	2	6	6	6	3	4	4	4	3	4	4	4	3	4	4	4	5.8	5.8	5.8	155.59	1392	1392;1392	0	10.802	By MS/MS	By MS/MS	By MS/MS	By MS/MS	0.83673	1.295	28.926	6	2	Leave out requantified	NaN	0.59546	0.99258	NaN	NaN	0.9863	1.4208	NaN
Q9D6C8;A0A0R4J1D0;A0A0R4J0J1;Q3UYN2;Q8BT60;P59108;Q1RLL3;Q9Z140;Q8BLR2;Q0VE82;Q9DC53;Q8JZW4	Q9D6C8;A0A0R4J1D0;A0A0R4J0J1;Q3UYN2;Q8BT60;P59108;Q1RLL3;Q9Z140;Q8BLR2;Q0VE82;Q9DC53;Q8JZW4	1;1;1;1;1;1;1;1;1;1;1;1	1;1;1;1;1;1;1;1;1;1;1;1	1;1;1;1;1;1;1;1;1;1;1;1	Copine-3;Copine-2;Copine-9;Copine-6;Copine-4;Copine-7;Copine-8;Copine-5	Cpne4;Cpne6;Cpne3;Cpne2;Cpne9;Cpne7;Cpne8;Cpne5	tr|Q9D6C8|Q9D6C8_MOUSE Copine-4 OS=Mus musculus OX=10090 GN=Cpne4 PE=1 SV=1;tr|A0A0R4J1D0|A0A0R4J1D0_MOUSE Copine-2 OS=Mus musculus OX=10090 GN=Cpne2 PE=1 SV=1;tr|A0A0R4J0J1|A0A0R4J0J1_MOUSE Copine-9 OS=Mus musculus OX=10090 GN=Cpne9 PE=1 SV=1;tr|Q3UYN2|Q3	12	1	1	1	1	1	0	1	1	1	0	1	1	1	0	1	1.9	1.9	1.9	52.783	475	475;547;553;556;533;548;553;557;557;557;577;593	0.001574	2.3845	By MS/MS	By MS/MS		By MS/MS	0.27068	0.3612	48.303	2	2	Median	NaN	NaN	NaN	NaN	NaN	NaN	NaN	NaN
Z4YL78;A0A0R4J0K2;K3W4R5;A2AGT5	Z4YL78;A0A0R4J0K2;K3W4R5;A2AGT5	13;13;13;13	13;13;13;13	13;13;13;13	Cytoskeleton-associated protein 5	Ckap5	tr|Z4YL78|Z4YL78_MOUSE Cytoskeleton-associated protein 5 OS=Mus musculus OX=10090 GN=Ckap5 PE=1 SV=1;tr|A0A0R4J0K2|A0A0R4J0K2_MOUSE Cytoskeleton-associated protein 5 OS=Mus musculus OX=10090 GN=Ckap5 PE=1 SV=1;tr|K3W4R5|K3W4R5_MOUSE Cytoskeleton-associated	4	13	13	13	10	5	9	8	10	5	9	8	10	5	9	8	8.2	8.2	8.2	218.71	1972	1972;2011;2032;2032	0	27.16	By MS/MS	By MS/MS	By MS/MS	By MS/MS	0.90736	1.2139	11.317	27	6	Leave out requantified	0.83203	0.81219	0.92761	0.95565	1.1585	1.336	1.328	1.1661
A0A0R4J0Q5;P21619	A0A0R4J0Q5;P21619	7;7	6;6	6;6	Lamin-B2	Lmnb2	tr|A0A0R4J0Q5|A0A0R4J0Q5_MOUSE Lamin-B2 OS=Mus musculus OX=10090 GN=Lmnb2 PE=1 SV=1;sp|P21619|LMNB2_MOUSE Lamin-B2 OS=Mus musculus OX=10090 GN=Lmnb2 PE=1 SV=2	2	7	6	6	5	4	1	5	4	4	1	5	4	4	1	5	12.4	11.1	11.1	69.084	615	615;596	0	15.834	By MS/MS	By MS/MS	By MS/MS	By MS/MS	0.11157	0.15543	124.36	7	5	Median	0.30083	0.26687	NaN	0.091981	0.41745	0.3807	NaN	0.11757
A0A0R4J0T5;P28659;S4R2J2;S4R2L5;A3KGT0;A0A0R4J2B0;V9GX43;S4R2U7;S4R1S7;E9QA47;Q9Z0H4	A0A0R4J0T5;P28659	5;5;1;1;1;1;1;1;1;1;1	5;5;1;1;1;1;1;1;1;1;1	5;5;1;1;1;1;1;1;1;1;1	CUGBP Elav-like family member 1	Celf1	tr|A0A0R4J0T5|A0A0R4J0T5_MOUSE CUG triplet repeat, RNA binding protein 1, isoform CRA_b OS=Mus musculus OX=10090 GN=Celf1 PE=1 SV=1;sp|P28659|CELF1_MOUSE CUGBP Elav-like family member 1 OS=Mus musculus OX=10090 GN=Celf1 PE=1 SV=2	11	5	5	5	1	1	2	3	1	1	2	3	1	1	2	3	12.7	12.7	12.7	52.178	487	487;486;92;134;159;440;443;460;472;478;508	0	11.15	By matching	By MS/MS	By MS/MS	By MS/MS	0.6979	0.98955	12.827	6	2	Leave out requantified	NaN	NaN	0.38242	0.75716	NaN	NaN	0.48555	0.92792
A0A0R4J0U7;Q8R395	A0A0R4J0U7;Q8R395	1;1	1;1	1;1	COMM domain-containing protein 5	Commd5	tr|A0A0R4J0U7|A0A0R4J0U7_MOUSE COMM domain-containing protein 5 OS=Mus musculus OX=10090 GN=Commd5 PE=1 SV=1;sp|Q8R395|COMD5_MOUSE COMM domain-containing protein 5 OS=Mus musculus OX=10090 GN=Commd5 PE=1 SV=1	2	1	1	1	0	0	0	1	0	0	0	1	0	0	0	1	7.6	7.6	7.6	24.467	224	224;224	0	3.3735				By MS/MS	NaN	NaN	NaN	0	0	Median	NaN	NaN	NaN	NaN	NaN	NaN	NaN	NaN
A0A0R4J0W6;Q9CRC8	A0A0R4J0W6;Q9CRC8	6;6	6;6	6;6	Leucine-rich repeat-containing protein 40	Lrrc40	tr|A0A0R4J0W6|A0A0R4J0W6_MOUSE Leucine rich repeat containing 40, isoform CRA_a OS=Mus musculus OX=10090 GN=Lrrc40 PE=1 SV=1;sp|Q9CRC8|LRC40_MOUSE Leucine-rich repeat-containing protein 40 OS=Mus musculus OX=10090 GN=Lrrc40 PE=1 SV=2	2	6	6	6	2	2	4	3	2	2	4	3	2	2	4	3	14	14	14	68.048	602	602;602	0	11.198	By MS/MS	By MS/MS	By MS/MS	By MS/MS	0.26186	0.29117	77.208	8	7	Median	0.25035	NaN	0.3614	0.20417	0.34874	NaN	0.40186	0.26098
A0A0R4J0Z1;P08003	A0A0R4J0Z1;P08003	20;20	20;20	20;20	Protein disulfide-isomerase A4	Pdia4	tr|A0A0R4J0Z1|A0A0R4J0Z1_MOUSE Protein disulfide-isomerase A4 OS=Mus musculus OX=10090 GN=Pdia4 PE=1 SV=1;sp|P08003|PDIA4_MOUSE Protein disulfide-isomerase A4 OS=Mus musculus OX=10090 GN=Pdia4 PE=1 SV=3	2	20	20	20	16	15	15	15	16	15	15	15	16	15	15	15	35.6	35.6	35.6	72.369	641	641;638	0	95.164	By MS/MS	By MS/MS	By MS/MS	By MS/MS	0.65338	0.95882	4.7698	66	9	Leave out requantified	0.69292	0.53818	0.64485	0.78178	1.0027	0.92056	0.94354	0.97712
A0A0R4J119;Q7TMB8;F6QD74;Q5SQX6;A0A0U1RQ05	A0A0R4J119;Q7TMB8;F6QD74;Q5SQX6	3;3;2;2;1	3;3;2;2;1	3;3;2;2;1	Cytoplasmic FMR1-interacting protein 1;Cytoplasmic FMR1-interacting protein 2	Cyfip1;Cyfip2	tr|A0A0R4J119|A0A0R4J119_MOUSE Cytoplasmic FMR1-interacting protein OS=Mus musculus OX=10090 GN=Cyfip1 PE=1 SV=1;sp|Q7TMB8|CYFP1_MOUSE Cytoplasmic FMR1-interacting protein 1 OS=Mus musculus OX=10090 GN=Cyfip1 PE=1 SV=1;tr|F6QD74|F6QD74_MOUSE Cytoplasmic FM	5	3	3	3	2	3	3	2	2	3	3	2	2	3	3	2	2.7	2.7	2.7	144.92	1251	1251;1253;948;1253;969	0	9.4424	By MS/MS	By MS/MS	By MS/MS	By MS/MS	0.082449	0.10125	7.3156	4	4	Median	NaN	NaN	NaN	NaN	NaN	NaN	NaN	NaN
A0A0R4J150;B9EJ86	A0A0R4J150;B9EJ86	1;1	1;1	1;1	Oxysterol-binding protein	Osbpl8	tr|A0A0R4J150|A0A0R4J150_MOUSE Oxysterol-binding protein OS=Mus musculus OX=10090 GN=Osbpl8 PE=1 SV=1;sp|B9EJ86|OSBL8_MOUSE Oxysterol-binding protein-related protein 8 OS=Mus musculus OX=10090 GN=Osbpl8 PE=1 SV=1	2	1	1	1	1	1	1	1	1	1	1	1	1	1	1	1	1.3	1.3	1.3	96.98	847	847;889	0.0010753	2.5982	By MS/MS	By MS/MS	By MS/MS	By MS/MS	NaN	NaN	NaN	0	0	Median	NaN	NaN	NaN	NaN	NaN	NaN	NaN	NaN
G3UX35;A0A0R4J170;Q3TKT4;E9QAB8;H3BJK2;F2Z4A9;H3BLH0;Q6DIC0;A0A140LJD7;E9Q9V7;A0A087WQY5	G3UX35;A0A0R4J170;Q3TKT4;E9QAB8;H3BJK2;F2Z4A9;H3BLH0;Q6DIC0	4;4;4;2;2;2;2;2;1;1;1	4;4;4;2;2;2;2;2;1;1;1	3;3;3;1;1;1;1;1;0;0;0	Transcription activator BRG1;Probable global transcription activator SNF2L2	Smarca4;Smarca2	tr|G3UX35|G3UX35_MOUSE Transcription activator BRG1 (Fragment) OS=Mus musculus OX=10090 GN=Smarca4 PE=1 SV=1;tr|A0A0R4J170|A0A0R4J170_MOUSE Transcription activator BRG1 OS=Mus musculus OX=10090 GN=Smarca4 PE=1 SV=1;sp|Q3TKT4|SMCA4_MOUSE Transcription activ	11	4	4	3	2	2	1	3	2	2	1	3	2	2	1	2	3.2	3.2	2.6	143.51	1267	1267;1617;1613;1510;1525;1583;1601;1577;228;936;1192	0	6.9338	By MS/MS	By MS/MS	By MS/MS	By MS/MS	0.90488	1.2605	27.406	5	5	Median	0.91356	NaN	NaN	NaN	1.2726	NaN	NaN	NaN
A0A2R8VHZ9;A0A0R4J187;P23475	A0A2R8VHZ9;A0A0R4J187;P23475	1;1;1	1;1;1	1;1;1	X-ray repair cross-complementing protein 6	Xrcc6	tr|A0A2R8VHZ9|A0A2R8VHZ9_MOUSE X-ray repair cross-complementing protein 6 OS=Mus musculus OX=10090 GN=Xrcc6 PE=1 SV=1;tr|A0A0R4J187|A0A0R4J187_MOUSE X-ray repair cross-complementing protein 6 OS=Mus musculus OX=10090 GN=Xrcc6 PE=1 SV=1;sp|P23475|XRCC6_MOUS	3	1	1	1	1	1	0	1	1	1	0	1	1	1	0	1	3.8	3.8	3.8	29.923	263	263;608;608	0	3.7367	By matching	By MS/MS		By MS/MS	0.69634	0.98629	23.067	3	1	Median	NaN	NaN	NaN	NaN	NaN	NaN	NaN	NaN
A0A0R4J195;Q9CSU0;Q8VDS4	A0A0R4J195;Q9CSU0;Q8VDS4	2;2;1	2;2;1	2;2;1	Regulation of nuclear pre-mRNA domain-containing protein 1B;Regulation of nuclear pre-mRNA domain-containing protein 1A	Rprd1b;Rprd1a	tr|A0A0R4J195|A0A0R4J195_MOUSE Regulation of nuclear pre-mRNA domain-containing protein 1B OS=Mus musculus OX=10090 GN=Rprd1b PE=1 SV=1;sp|Q9CSU0|RPR1B_MOUSE Regulation of nuclear pre-mRNA domain-containing protein 1B OS=Mus musculus OX=10090 GN=Rprd1b PE=	3	2	2	2	1	1	2	1	1	1	2	1	1	1	2	1	9.2	9.2	9.2	36.812	325	325;326;312	0	4.4866	By MS/MS	By MS/MS	By MS/MS	By MS/MS	0.66432	0.99439	130.51	5	3	Median	NaN	NaN	0.17812	NaN	NaN	NaN	0.2298	NaN
G3UWM7;G3UWZ6;A0A0R4J1B9;G3X9M0;Q9ER88	G3UWM7;G3UWZ6;A0A0R4J1B9;G3X9M0;Q9ER88	1;1;1;1;1	1;1;1;1;1	1;1;1;1;1	28S ribosomal protein S29, mitochondrial	Dap3	tr|G3UWM7|G3UWM7_MOUSE 28S ribosomal protein S29, mitochondrial (Fragment) OS=Mus musculus OX=10090 GN=Dap3 PE=1 SV=1;tr|G3UWZ6|G3UWZ6_MOUSE 28S ribosomal protein S29, mitochondrial (Fragment) OS=Mus musculus OX=10090 GN=Dap3 PE=1 SV=1;tr|A0A0R4J1B9|A0A0R4	5	1	1	1	0	0	1	0	0	0	1	0	0	0	1	0	5.5	5.5	5.5	25.027	217	217;255;366;396;391	0	3.4819			By MS/MS		NaN	NaN	NaN	1	1	Median	NaN	NaN	NaN	NaN	NaN	NaN	NaN	NaN
A0A0R4J1E3;Q9QXS6;F7CPL2	A0A0R4J1E3;Q9QXS6	9;9;4	9;9;4	9;9;4	Drebrin	Dbn1	tr|A0A0R4J1E3|A0A0R4J1E3_MOUSE Drebrin OS=Mus musculus OX=10090 GN=Dbn1 PE=1 SV=1;sp|Q9QXS6|DREB_MOUSE Drebrin OS=Mus musculus OX=10090 GN=Dbn1 PE=1 SV=4	3	9	9	9	4	5	6	2	4	5	6	2	4	5	6	2	15.7	15.7	15.7	72.544	661	661;706;169	0	35.005	By MS/MS	By MS/MS	By MS/MS	By MS/MS	0.8337	1.1077	60.21	12	5	Leave out requantified	0.62306	0.30956	0.71517	1.0829	0.88481	0.43647	1	1.3346
A0A0R4J1H6;E9QP99;P55937	A0A0R4J1H6;E9QP99;P55937	1;1;1	1;1;1	1;1;1	Golgin subfamily A member 3	Golga3	tr|A0A0R4J1H6|A0A0R4J1H6_MOUSE Golgin subfamily A member 3 OS=Mus musculus OX=10090 GN=Golga3 PE=1 SV=1;tr|E9QP99|E9QP99_MOUSE Golgin subfamily A member 3 OS=Mus musculus OX=10090 GN=Golga3 PE=1 SV=1;sp|P55937|GOGA3_MOUSE Golgin subfamily A member 3 OS=Mus	3	1	1	1	1	1	1	0	1	1	1	0	1	1	1	0	1	1	1	162.89	1447	1447;1487;1487	0	3.1575	By MS/MS	By MS/MS	By MS/MS		0.21624	0.30123	33.468	3	3	Plateau	NaN	NaN	NaN	NaN	NaN	NaN	NaN	NaN
A0A0R4J1L2;Q91VK2;F6ZFU0;D3YY68;D3Z7N2	A0A0R4J1L2;Q91VK2;F6ZFU0;D3YY68	17;16;16;14;7	1;0;1;0;1	1;0;1;0;1		Eef1d	tr|A0A0R4J1L2|A0A0R4J1L2_MOUSE Elongation factor 1-delta OS=Mus musculus OX=10090 GN=Eef1d PE=1 SV=1;tr|Q91VK2|Q91VK2_MOUSE Eef1d protein OS=Mus musculus OX=10090 GN=Eef1d PE=1 SV=1;tr|F6ZFU0|F6ZFU0_MOUSE Elongation factor 1-delta (Fragment) OS=Mus musculu	5	17	1	1	13	13	14	11	0	1	0	0	0	1	0	0	60.3	8.2	8.2	28.728	257	257;276;552;190;129	0	4.4364	By matching	By MS/MS	By matching	By matching	NaN	NaN	NaN	1	1	Median	NaN	NaN	NaN	NaN	NaN	NaN	NaN	NaN
A0A0R4J1Q0;G5E896;Q3UJB9;D6RE33;F6ZJ27	A0A0R4J1Q0;G5E896;Q3UJB9;D6RE33	4;4;4;3;1	4;4;4;3;1	4;4;4;3;1	Enhancer of mRNA-decapping protein 4	Edc4	tr|A0A0R4J1Q0|A0A0R4J1Q0_MOUSE Enhancer of mRNA-decapping protein 4 OS=Mus musculus OX=10090 GN=Edc4 PE=1 SV=1;tr|G5E896|G5E896_MOUSE Enhancer of mRNA decapping 4, isoform CRA_b OS=Mus musculus OX=10090 GN=Edc4 PE=1 SV=1;sp|Q3UJB9|EDC4_MOUSE Enhancer of mR	5	4	4	4	0	1	2	2	0	1	2	2	0	1	2	2	5.1	5.1	5.1	150.65	1390	1390;1406;1406;1318;427	0	5.6319		By MS/MS	By MS/MS	By MS/MS	0.58846	0.91371	102.6	4	1	Median	NaN	NaN	NaN	0.3327	NaN	NaN	NaN	0.41517
A0A0R4J1R7;Q9CZL5	A0A0R4J1R7;Q9CZL5	1;1	1;1	1;1	Pterin-4-alpha-carbinolamine dehydratase 2	Pcbd2	tr|A0A0R4J1R7|A0A0R4J1R7_MOUSE Pterin-4-alpha-carbinolamine dehydratase 2 OS=Mus musculus OX=10090 GN=Pcbd2 PE=1 SV=1;sp|Q9CZL5|PHS2_MOUSE Pterin-4-alpha-carbinolamine dehydratase 2 OS=Mus musculus OX=10090 GN=Pcbd2 PE=1 SV=2	2	1	1	1	0	1	1	0	0	1	1	0	0	1	1	0	10.7	10.7	10.7	11.74	103	103;136	0	3.4829		By MS/MS	By MS/MS		NaN	NaN	NaN	0	0	Median	NaN	NaN	NaN	NaN	NaN	NaN	NaN	NaN
G3X8W7;A0A0R4J1W7;Q8BGZ4	G3X8W7;A0A0R4J1W7;Q8BGZ4	1;1;1	1;1;1	1;1;1	Cell division cycle protein 23 homolog	Cdc23	tr|G3X8W7|G3X8W7_MOUSE CDC23 (Cell division cycle 23, yeast, homolog), isoform CRA_a OS=Mus musculus OX=10090 GN=Cdc23 PE=1 SV=1;tr|A0A0R4J1W7|A0A0R4J1W7_MOUSE CDC23 (Cell division cycle 23, yeast, homolog), isoform CRA_c OS=Mus musculus OX=10090 GN=Cdc23	3	1	1	1	1	1	1	1	1	1	1	1	1	1	1	1	1.8	1.8	1.8	65.877	571	571;597;597	0.0057582	1.7345	By MS/MS	By MS/MS	By MS/MS	By MS/MS	NaN	NaN	NaN	0	0	Median	NaN	NaN	NaN	NaN	NaN	NaN	NaN	NaN
A0A0R4J1Y7;E9PXX7;Q91W90	A0A0R4J1Y7;E9PXX7;Q91W90	6;6;6	6;6;6	6;6;6	Thioredoxin domain-containing protein 5	Txndc5	tr|A0A0R4J1Y7|A0A0R4J1Y7_MOUSE Thioredoxin domain-containing protein 5 OS=Mus musculus OX=10090 GN=Txndc5 PE=1 SV=1;tr|E9PXX7|E9PXX7_MOUSE Thioredoxin domain-containing protein 5 OS=Mus musculus OX=10090 GN=Txndc5 PE=1 SV=1;sp|Q91W90|TXND5_MOUSE Thioredoxi	3	6	6	6	2	2	5	4	2	2	5	4	2	2	5	4	24.8	24.8	24.8	36.083	323	323;344;417	0	17.25	By MS/MS	By MS/MS	By MS/MS	By MS/MS	0.71808	0.9119	15.082	10	5	Leave out requantified	0.14846	0.19338	0.75487	0.71808	0.20873	0.27539	1.0734	0.89948
A0A0R4J1Z3;Q9CR67;Q9CZM3;E0CXY5	A0A0R4J1Z3;Q9CR67;Q9CZM3	3;3;2;1	3;3;2;1	3;3;2;1	Transmembrane protein 33	Tmem33	tr|A0A0R4J1Z3|A0A0R4J1Z3_MOUSE Transmembrane protein 33 OS=Mus musculus OX=10090 GN=Tmem33 PE=1 SV=1;sp|Q9CR67|TMM33_MOUSE Transmembrane protein 33 OS=Mus musculus OX=10090 GN=Tmem33 PE=1 SV=1;tr|Q9CZM3|Q9CZM3_MOUSE Transmembrane protein 33 OS=Mus musculus	4	3	3	3	2	1	2	2	2	1	2	2	2	1	2	2	11.8	11.8	11.8	27.932	246	246;247;126;42	0	9.1279	By MS/MS	By MS/MS	By MS/MS	By MS/MS	0.025949	0.033813	33.247	3	3	Median	NaN	NaN	NaN	NaN	NaN	NaN	NaN	NaN
G3UZI2;A0A0R4J259;G3V018;Q7TMK9;G3UZ48;G3UXJ6;G3UWM1;G3XA76;G3UXU5;S4R1E9	G3UZI2;A0A0R4J259;G3V018;Q7TMK9;G3UZ48;G3UXJ6	14;14;14;14;11;9;5;2;1;1	9;9;9;9;7;6;3;2;0;0	9;9;9;9;7;6;3;2;0;0	Heterogeneous nuclear ribonucleoprotein Q	Syncrip	tr|G3UZI2|G3UZI2_MOUSE Heterogeneous nuclear ribonucleoprotein Q OS=Mus musculus OX=10090 GN=Syncrip PE=1 SV=1;tr|A0A0R4J259|A0A0R4J259_MOUSE Heterogeneous nuclear ribonucleoprotein Q OS=Mus musculus OX=10090 GN=Syncrip PE=1 SV=1;tr|G3V018|G3V018_MOUSE Het	10	14	9	9	10	9	9	11	6	8	6	7	6	8	6	7	28.3	19.2	19.2	58.751	527	527;561;588;623;464;448;196;94;67;72	0	37.226	By MS/MS	By MS/MS	By MS/MS	By MS/MS	0.72589	1.0601	71.967	26	9	Leave out requantified	0.75285	0.68087	0.74878	0.86538	1.0193	1.1473	1.0668	1.0534
A0A0U1RNK7;E9PX48;A2A9M5;A2A9M4;Q8R1A4;A0A0U1RPH6;A2AW79;F6ZJ55;A0A0U1RNY4	A0A0U1RNK7;E9PX48;A2A9M5;A2A9M4;Q8R1A4	3;3;3;3;3;1;1;1;1	3;3;3;3;3;1;1;1;1	3;3;3;3;3;1;1;1;1	Dedicator of cytokinesis protein 7	Dock7	tr|A0A0U1RNK7|A0A0U1RNK7_MOUSE Dedicator of cytokinesis protein 7 OS=Mus musculus OX=10090 GN=Dock7 PE=1 SV=1;tr|E9PX48|E9PX48_MOUSE Dedicator of cytokinesis protein 7 OS=Mus musculus OX=10090 GN=Dock7 PE=1 SV=2;tr|A2A9M5|A2A9M5_MOUSE Dedicator of cytokine	9	3	3	3	1	1	0	3	1	1	0	3	1	1	0	3	2	2	2	238.09	2098	2098;2100;2128;2130;2130;46;247;255;811	0	4.6081	By MS/MS	By MS/MS		By MS/MS	0.36052	0.46083	74.211	5	4	Median	NaN	NaN	NaN	0.36052	NaN	NaN	NaN	0.46083
A0A0U1RPJ7;D3YVR9;Q9R0P4;A0A0U1RPI0;D6RI64	A0A0U1RPJ7;D3YVR9;Q9R0P4;A0A0U1RPI0;D6RI64	2;2;2;1;1	2;2;2;1;1	2;2;2;1;1	Small acidic protein	1110004F10Rik;Smap	tr|A0A0U1RPJ7|A0A0U1RPJ7_MOUSE RIKEN cDNA 1110004F10 gene (Fragment) OS=Mus musculus OX=10090 GN=1110004F10Rik PE=1 SV=1;tr|D3YVR9|D3YVR9_MOUSE MCG7316, isoform CRA_b OS=Mus musculus OX=10090 GN=1110004F10Rik PE=1 SV=1;sp|Q9R0P4|SMAP_MOUSE Small acidic pro	5	2	2	2	1	1	2	1	1	1	2	1	1	1	2	1	40	40	40	6.8525	60	60;137;181;21;81	0	4.7935	By MS/MS	By MS/MS	By MS/MS	By MS/MS	0.8183	1.175	14.379	5	0	Leave out requantified	NaN	NaN	0.78916	NaN	NaN	NaN	1.1575	NaN
A0A0U1RPL0;E9Q5Q0;Q3TGG2;Q7TQH0;J3QP59	A0A0U1RPL0;E9Q5Q0;Q3TGG2;Q7TQH0	6;5;5;5;1	6;5;5;5;1	6;5;5;5;1	Ataxin-2-like protein	Atxn2l	tr|A0A0U1RPL0|A0A0U1RPL0_MOUSE Ataxin-2-like protein OS=Mus musculus OX=10090 GN=Atxn2l PE=1 SV=1;tr|E9Q5Q0|E9Q5Q0_MOUSE Ataxin-2-like protein (Fragment) OS=Mus musculus OX=10090 GN=Atxn2l PE=1 SV=2;tr|Q3TGG2|Q3TGG2_MOUSE Ataxin-2-like protein OS=Mus muscu	5	6	6	6	5	2	2	3	5	2	2	3	5	2	2	3	6.8	6.8	6.8	115.26	1096	1096;863;994;1049;218	0	8.8473	By MS/MS	By MS/MS	By MS/MS	By MS/MS	0.67496	1.0187	9.768	9	3	Leave out requantified	0.6371	0.65613	0.47054	0.61325	0.8957	1.1236	0.59741	0.75482
A0A0U1RPW2;B9EHJ3;P39447	A0A0U1RPW2;B9EHJ3;P39447	1;1;1	1;1;1	1;1;1	Tight junction protein ZO-1	Tjp1	tr|A0A0U1RPW2|A0A0U1RPW2_MOUSE Tight junction protein ZO-1 OS=Mus musculus OX=10090 GN=Tjp1 PE=1 SV=1;tr|B9EHJ3|B9EHJ3_MOUSE Tight junction protein ZO-1 OS=Mus musculus OX=10090 GN=Tjp1 PE=1 SV=1;sp|P39447|ZO1_MOUSE Tight junction protein ZO-1 OS=Mus muscu	3	1	1	1	0	1	1	1	0	1	1	1	0	1	1	1	1.7	1.7	1.7	127.25	1128	1128;1685;1745	0	3.3776		By MS/MS	By MS/MS	By MS/MS	0.2637	0.2908	29.416	3	3	Plateau	NaN	NaN	NaN	NaN	NaN	NaN	NaN	NaN
A0A0U1RQ06;P62743	A0A0U1RQ06;P62743	1;1	1;1	1;1	AP-2 complex subunit sigma	Ap2s1	tr|A0A0U1RQ06|A0A0U1RQ06_MOUSE AP-2 complex subunit sigma OS=Mus musculus OX=10090 GN=Ap2s1 PE=1 SV=1;sp|P62743|AP2S1_MOUSE AP-2 complex subunit sigma OS=Mus musculus OX=10090 GN=Ap2s1 PE=1 SV=1	2	1	1	1	0	1	1	0	0	1	1	0	0	1	1	0	9.8	9.8	9.8	11.034	92	92;142	0.0057389	1.7155		By MS/MS	By MS/MS		NaN	NaN	NaN	0	0	Median	NaN	NaN	NaN	NaN	NaN	NaN	NaN	NaN
A0A0X1KG62;F6SWS9;Q8C4Y3	A0A0X1KG62;F6SWS9;Q8C4Y3	2;1;1	2;1;1	2;1;1	Negative elongation factor B	Nelfb	tr|A0A0X1KG62|A0A0X1KG62_MOUSE Negative elongation factor B OS=Mus musculus OX=10090 GN=Nelfb PE=1 SV=1;tr|F6SWS9|F6SWS9_MOUSE Negative elongation factor B (Fragment) OS=Mus musculus OX=10090 GN=Nelfb PE=1 SV=1;sp|Q8C4Y3|NELFB_MOUSE Negative elongation fac	3	2	2	2	2	0	1	1	2	0	1	1	2	0	1	1	4	4	4	70.32	631	631;204;580	0	2.9617	By MS/MS		By MS/MS	By MS/MS	NaN	NaN	NaN	1	1	Median	NaN	NaN	NaN	NaN	NaN	NaN	NaN	NaN
A0A140LHA2;Q9WVA3;A0A140LIM5;A0A140LJ21;A0A140LI47	A0A140LHA2;Q9WVA3	9;9;3;3;1	9;9;3;3;1	9;9;3;3;1	Mitotic checkpoint protein BUB3	Bub3	tr|A0A140LHA2|A0A140LHA2_MOUSE Mitotic checkpoint protein BUB3 OS=Mus musculus OX=10090 GN=Bub3 PE=1 SV=1;sp|Q9WVA3|BUB3_MOUSE Mitotic checkpoint protein BUB3 OS=Mus musculus OX=10090 GN=Bub3 PE=1 SV=2	5	9	9	9	6	4	6	8	6	4	6	8	6	4	6	8	29.9	29.9	29.9	36.766	324	324;326;184;220;100	0	35.527	By MS/MS	By MS/MS	By MS/MS	By MS/MS	0.77775	1.0469	6.7405	22	14	Leave out requantified	0.20387	0.37636	0.39178	0.11724	0.28401	0.53548	0.49763	0.14987
A0A140LHE6;A0A140LJE8;P70671	A0A140LHE6;A0A140LJE8;P70671	1;1;1	1;1;1	1;1;1	Interferon regulatory factor 3	Irf3	tr|A0A140LHE6|A0A140LHE6_MOUSE Interferon regulatory factor 3 (Fragment) OS=Mus musculus OX=10090 GN=Irf3 PE=1 SV=1;tr|A0A140LJE8|A0A140LJE8_MOUSE Interferon regulatory factor 3 (Fragment) OS=Mus musculus OX=10090 GN=Irf3 PE=1 SV=1;sp|P70671|IRF3_MOUSE Int	3	1	1	1	1	1	1	1	1	1	1	1	1	1	1	1	6.9	6.9	6.9	17.941	160	160;161;419	0.0044226	1.9049	By matching	By matching	By matching	By MS/MS	0.80134	0.95134	5.9896	4	0	Linear	NaN	NaN	NaN	NaN	NaN	NaN	NaN	NaN
A0A140LHW5;A0A140LIK0;A0A140LJ01;A0A140LHG8;Q9CYN2	A0A140LHW5;A0A140LIK0;A0A140LJ01;A0A140LHG8;Q9CYN2	1;1;1;1;1	1;1;1;1;1	1;1;1;1;1	Signal peptidase complex subunit 2	Spcs2	tr|A0A140LHW5|A0A140LHW5_MOUSE Signal peptidase complex subunit 2 OS=Mus musculus OX=10090 GN=Spcs2 PE=1 SV=1;tr|A0A140LIK0|A0A140LIK0_MOUSE Signal peptidase complex subunit 2 OS=Mus musculus OX=10090 GN=Spcs2 PE=1 SV=1;tr|A0A140LJ01|A0A140LJ01_MOUSE Signa	5	1	1	1	0	1	0	0	0	1	0	0	0	1	0	0	29.7	29.7	29.7	7.36	74	74;177;252;260;226	0	3.7094		By MS/MS			NaN	NaN	NaN	0	0	Median	NaN	NaN	NaN	NaN	NaN	NaN	NaN	NaN
A0A140LIW6;A0A140LHY7;Q8BH76;Q9EQ28	A0A140LIW6;A0A140LHY7;Q8BH76;Q9EQ28	1;1;1;1	1;1;1;1	1;1;1;1	DNA polymerase delta subunit 3	Pold3	tr|A0A140LIW6|A0A140LIW6_MOUSE DNA polymerase delta subunit 3 (Fragment) OS=Mus musculus OX=10090 GN=Pold3 PE=1 SV=1;tr|A0A140LHY7|A0A140LHY7_MOUSE DNA polymerase delta subunit 3 OS=Mus musculus OX=10090 GN=Pold3 PE=1 SV=1;tr|Q8BH76|Q8BH76_MOUSE DNA polyme	4	1	1	1	0	0	1	0	0	0	1	0	0	0	1	0	4.5	4.5	4.5	28.998	269	269;422;461;462	0	4.8509			By MS/MS		NaN	NaN	NaN	0	0	Median	NaN	NaN	NaN	NaN	NaN	NaN	NaN	NaN
A0A140LIT2;O88455	A0A140LIT2;O88455	3;3	3;3	3;3	7-dehydrocholesterol reductase	Dhcr7	tr|A0A140LIT2|A0A140LIT2_MOUSE 7-dehydrocholesterol reductase OS=Mus musculus OX=10090 GN=Dhcr7 PE=1 SV=1;sp|O88455|DHCR7_MOUSE 7-dehydrocholesterol reductase OS=Mus musculus OX=10090 GN=Dhcr7 PE=1 SV=1	2	3	3	3	0	3	2	0	0	3	2	0	0	3	2	0	6.8	6.8	6.8	54.219	474	474;471	0	6.8621		By MS/MS	By MS/MS		0.44362	0.49328	104.07	5	5	Median	NaN	0.14481	0.54538	NaN	NaN	0.17264	0.69668	NaN
A0A140LJ59;Q9DBZ5;Q3TY56	A0A140LJ59;Q9DBZ5	3;3;1	3;3;1	3;3;1	Eukaryotic translation initiation factor 3 subunit K	Eif3k	tr|A0A140LJ59|A0A140LJ59_MOUSE Eukaryotic translation initiation factor 3 subunit K OS=Mus musculus OX=10090 GN=Eif3k PE=1 SV=1;sp|Q9DBZ5|EIF3K_MOUSE Eukaryotic translation initiation factor 3 subunit K OS=Mus musculus OX=10090 GN=Eif3k PE=1 SV=1	3	3	3	3	0	1	2	2	0	1	2	2	0	1	2	2	41.5	41.5	41.5	6.088	53	53;218;192	0	8.3675		By MS/MS	By MS/MS	By MS/MS	0.52492	0.63812	80.891	4	4	Linear	NaN	NaN	NaN	0.36477	NaN	NaN	NaN	0.43307
A0A140LJ70;A0A140LHS4;A0A140LI33;A0A140LIF7;A0A140LJ68;Q6PAK3	A0A140LJ70;A0A140LHS4;A0A140LI33	10;7;5;3;3;1	1;1;0;0;0;0	1;1;0;0;0;0			tr|A0A140LJ70|A0A140LJ70_MOUSE Protein arginine N-methyltransferase 1 OS=Mus musculus OX=10090 GN=Prmt1 PE=1 SV=1;tr|A0A140LHS4|A0A140LHS4_MOUSE Protein arginine N-methyltransferase 1 (Fragment) OS=Mus musculus OX=10090 GN=Prmt1 PE=1 SV=1;tr|A0A140LI33|A0A	6	10	1	1	7	9	9	7	0	1	1	0	0	1	1	0	54.7	12.2	12.2	28.909	254	254;217;153;113;122;394	0.0015641	2.3385	By matching	By MS/MS	By MS/MS	By matching	0.95078	1.5773	9.1563	2	0	Median	NaN	NaN	NaN	NaN	NaN	NaN	NaN	NaN
A0A140LJB7;Q3MIA8;B1ATU4;G3UXW9;Q99LD4	A0A140LJB7;Q3MIA8;B1ATU4;G3UXW9;Q99LD4	5;5;5;5;5	5;5;5;5;5	5;5;5;5;5	COP9 signalosome complex subunit 1	Gps1	tr|A0A140LJB7|A0A140LJB7_MOUSE COP9 signalosome complex subunit 1 OS=Mus musculus OX=10090 GN=Gps1 PE=1 SV=1;tr|Q3MIA8|Q3MIA8_MOUSE COP9 signalosome complex subunit 1 OS=Mus musculus OX=10090 GN=Gps1 PE=1 SV=1;tr|B1ATU4|B1ATU4_MOUSE COP9 signalosome comple	5	5	5	5	3	4	3	4	3	4	3	4	3	4	3	4	11.3	11.3	11.3	55.034	486	486;487;490;526;471	0	10.332	By MS/MS	By MS/MS	By MS/MS	By MS/MS	0.19337	0.23871	134.04	14	8	Median	0.16101	0.3075	0.2196	0.16672	0.22466	0.4363	0.27838	0.2131
A0A140LJL0;P35762	A0A140LJL0;P35762	1;1	1;1	1;1	CD81 antigen	Cd81	tr|A0A140LJL0|A0A140LJL0_MOUSE CD81 antigen (Fragment) OS=Mus musculus OX=10090 GN=Cd81 PE=1 SV=1;sp|P35762|CD81_MOUSE CD81 antigen OS=Mus musculus OX=10090 GN=Cd81 PE=1 SV=2	2	1	1	1	1	0	0	1	1	0	0	1	1	0	0	1	19	19	19	13.176	121	121;236	0	5.1584	By MS/MS			By MS/MS	NaN	NaN	NaN	0	0	Median	NaN	NaN	NaN	NaN	NaN	NaN	NaN	NaN
A0A171EBL2;E9Q555	A0A171EBL2;E9Q555	3;3	3;3	3;3	E3 ubiquitin-protein ligase RNF213	Rnf213	tr|A0A171EBL2|A0A171EBL2_MOUSE E3 ubiquitin-protein ligase RNF213 OS=Mus musculus OX=10090 GN=Rnf213 PE=1 SV=1;sp|E9Q555|RN213_MOUSE E3 ubiquitin-protein ligase RNF213 OS=Mus musculus OX=10090 GN=Rnf213 PE=1 SV=2	2	3	3	3	1	0	1	3	1	0	1	3	1	0	1	3	0.8	0.8	0.8	584.62	5151	5151;5152	0	2.7132	By MS/MS		By MS/MS	By MS/MS	0.05446	0.075866	301.76	3	2	Median	NaN	NaN	NaN	0.035695	NaN	NaN	NaN	0.044317
A0A171KXD3;Q9JIF0;A0A140LHF7;A0A140LJF4	A0A171KXD3;Q9JIF0;A0A140LHF7	13;13;7;6	13;13;7;6	4;4;4;3	Protein arginine N-methyltransferase 1	Prmt1	tr|A0A171KXD3|A0A171KXD3_MOUSE Protein arginine N-methyltransferase 1 OS=Mus musculus OX=10090 GN=Prmt1 PE=1 SV=1;sp|Q9JIF0|ANM1_MOUSE Protein arginine N-methyltransferase 1 OS=Mus musculus OX=10090 GN=Prmt1 PE=1 SV=1;tr|A0A140LHF7|A0A140LHF7_MOUSE Protein	4	13	13	4	11	11	11	11	11	11	11	11	4	3	3	4	49.1	49.1	15.1	36.567	318	318;371;208;193	0	79.709	By MS/MS	By MS/MS	By MS/MS	By MS/MS	0.67055	1.0038	15.116	53	11	Leave out requantified	0.71415	0.61556	0.65091	0.84059	1.015	1.0613	0.96869	1.048
A0A1B0GR11;Q93092	A0A1B0GR11;Q93092	12;12	12;12	12;12	Transaldolase	Taldo1	tr|A0A1B0GR11|A0A1B0GR11_MOUSE Transaldolase OS=Mus musculus OX=10090 GN=Taldo1 PE=1 SV=1;sp|Q93092|TALDO_MOUSE Transaldolase OS=Mus musculus OX=10090 GN=Taldo1 PE=1 SV=2	2	12	12	12	9	12	10	10	9	12	10	10	9	12	10	10	28	28	28	42.151	382	382;337	0	35.509	By MS/MS	By MS/MS	By MS/MS	By MS/MS	0.63668	0.98841	10.11	44	8	Leave out requantified	0.66988	0.58071	0.65946	0.84637	0.95127	0.97958	0.96702	1.0628
A0A1B0GR19;A0A1B0GR86;Q8BH97;A0A1B0GSK5;A0A1B0GS22;A0A1B0GRI0	A0A1B0GR19;A0A1B0GR86;Q8BH97;A0A1B0GSK5;A0A1B0GS22	5;5;5;4;3;2	5;5;5;4;3;2	5;5;5;4;3;2	Reticulocalbin-3	Rcn3	tr|A0A1B0GR19|A0A1B0GR19_MOUSE Reticulocalbin-3 (Fragment) OS=Mus musculus OX=10090 GN=Rcn3 PE=1 SV=1;tr|A0A1B0GR86|A0A1B0GR86_MOUSE Reticulocalbin-3 (Fragment) OS=Mus musculus OX=10090 GN=Rcn3 PE=1 SV=1;sp|Q8BH97|RCN3_MOUSE Reticulocalbin-3 OS=Mus musculu	6	5	5	5	2	2	3	3	2	2	3	3	2	2	3	3	21.5	21.5	21.5	31.843	274	274;280;328;186;122;115	0	12.676	By MS/MS	By MS/MS	By MS/MS	By MS/MS	0.70848	0.90561	120.39	9	8	Median	0.99302	0.86268	0.49371	0.70848	1.3897	1.2232	0.62565	0.90561
A0A1B0GR60;Q9CPX4;P49945;P29391	A0A1B0GR60;Q9CPX4;P49945;P29391	1;1;1;1	1;1;1;1	1;1;1;1	Ferritin;Ferritin light chain 2;Ferritin light chain 1	Ftl1;Ftl2	tr|A0A1B0GR60|A0A1B0GR60_MOUSE Ferritin OS=Mus musculus OX=10090 GN=Ftl1 PE=1 SV=1;tr|Q9CPX4|Q9CPX4_MOUSE Ferritin OS=Mus musculus OX=10090 GN=Ftl1 PE=1 SV=1;sp|P49945|FRIL2_MOUSE Ferritin light chain 2 OS=Mus musculus OX=10090 GN=Ftl2 PE=3 SV=2;sp|P29391|	4	1	1	1	1	1	0	1	1	1	0	1	1	1	0	1	10	10	10	17.999	160	160;183;183;183	0	3.2199	By MS/MS	By MS/MS		By MS/MS	0.077756	0.10832	188.95	3	3	Median	NaN	NaN	NaN	NaN	NaN	NaN	NaN	NaN
A0A1B0GT83;A0A1B0GS16;A0A1B0GR92;A0A1C7CYU3;Q02819	A0A1B0GT83;A0A1B0GS16;A0A1B0GR92;A0A1C7CYU3;Q02819	1;1;1;1;1	1;1;1;1;1	1;1;1;1;1	Nucleobindin-1	Nucb1	tr|A0A1B0GT83|A0A1B0GT83_MOUSE Nucleobindin-1 (Fragment) OS=Mus musculus OX=10090 GN=Nucb1 PE=1 SV=1;tr|A0A1B0GS16|A0A1B0GS16_MOUSE Nucleobindin-1 (Fragment) OS=Mus musculus OX=10090 GN=Nucb1 PE=1 SV=1;tr|A0A1B0GR92|A0A1B0GR92_MOUSE Nucleobindin-1 (Fragmen	5	1	1	1	0	0	0	1	0	0	0	1	0	0	0	1	10.7	10.7	10.7	13.61	121	121;170;220;455;459	0.0010593	2.4629				By MS/MS	NaN	NaN	NaN	1	1	Median	NaN	NaN	NaN	NaN	NaN	NaN	NaN	NaN
A0A1B0GRP7;Q9Z2Y8;A0A1B0GSP5;A0A1B0GRR5;Q6P8V7;A0A1B0GSA1;A0A1B0GQY5;Q80ZV3	A0A1B0GRP7;Q9Z2Y8;A0A1B0GSP5;A0A1B0GRR5;Q6P8V7	3;3;2;2;2;1;1;1	3;3;2;2;2;1;1;1	3;3;2;2;2;1;1;1	Proline synthase co-transcribed bacterial homolog protein	Prosc	tr|A0A1B0GRP7|A0A1B0GRP7_MOUSE Pyridoxal phosphate homeostasis protein (Fragment) OS=Mus musculus OX=10090 GN=Plpbp PE=1 SV=1;sp|Q9Z2Y8|PLPHP_MOUSE Pyridoxal phosphate homeostasis protein OS=Mus musculus OX=10090 GN=Plpbp PE=1 SV=1;tr|A0A1B0GSP5|A0A1B0GSP5	8	3	3	3	1	0	2	1	1	0	2	1	1	0	2	1	13.9	13.9	13.9	36.061	330	330;274;128;137;153;67;129;141	0	7.3307	By matching		By MS/MS	By MS/MS	0.8201	1.0629	19.265	4	2	Median	NaN	NaN	0.71593	NaN	NaN	NaN	1.0225	NaN
A0A1B0GRU8;Q9R1C7	A0A1B0GRU8;Q9R1C7	2;2	2;2	2;2	Pre-mRNA-processing factor 40 homolog A	Prpf40a	tr|A0A1B0GRU8|A0A1B0GRU8_MOUSE Pre-mRNA-processing factor 40 homolog A OS=Mus musculus OX=10090 GN=Prpf40a PE=1 SV=1;sp|Q9R1C7|PR40A_MOUSE Pre-mRNA-processing factor 40 homolog A OS=Mus musculus OX=10090 GN=Prpf40a PE=1 SV=1	2	2	2	2	1	1	2	1	1	1	2	1	1	1	2	1	2.9	2.9	2.9	105.53	926	926;953	0	3.8831	By MS/MS	By MS/MS	By MS/MS	By MS/MS	0.72314	1.0459	20.67	5	1	Median	NaN	NaN	1.0368	NaN	NaN	NaN	1.3012	NaN
A0A1B0GRV0;Q9Z0S1;D3Z0E6;D3Z5X0	A0A1B0GRV0;Q9Z0S1;D3Z0E6	9;9;5;4	9;9;5;4	9;9;5;4	3(2),5-bisphosphate nucleotidase 1	Bpnt1	tr|A0A1B0GRV0|A0A1B0GRV0_MOUSE 3(2),5-bisphosphate nucleotidase 1 OS=Mus musculus OX=10090 GN=Bpnt1 PE=1 SV=1;sp|Q9Z0S1|BPNT1_MOUSE 3(2),5-bisphosphate nucleotidase 1 OS=Mus musculus OX=10090 GN=Bpnt1 PE=1 SV=2;tr|D3Z0E6|D3Z0E6_MOUSE 3(2),5-bispho	4	9	9	9	5	6	7	6	5	6	7	6	5	6	7	6	33.7	33.7	33.7	34.973	323	323;308;253;83	0	42.193	By MS/MS	By MS/MS	By MS/MS	By MS/MS	0.66355	0.81561	61.862	24	8	Leave out requantified	0.56642	0.7092	0.83419	0.65542	0.79083	1.2276	1.2448	0.80945
A0A1B0GS13;A0A1B0GT81;A0A1B0GTA4;A0A1B0GSH8;Q07813	A0A1B0GS13;A0A1B0GT81;A0A1B0GTA4;A0A1B0GSH8;Q07813	1;1;1;1;1	1;1;1;1;1	1;1;1;1;1	Apoptosis regulator BAX	Bax	tr|A0A1B0GS13|A0A1B0GS13_MOUSE Apoptosis regulator BAX (Fragment) OS=Mus musculus OX=10090 GN=Bax PE=1 SV=1;tr|A0A1B0GT81|A0A1B0GT81_MOUSE Apoptosis regulator BAX OS=Mus musculus OX=10090 GN=Bax PE=1 SV=1;tr|A0A1B0GTA4|A0A1B0GTA4_MOUSE Apoptosis regulator	5	1	1	1	0	1	1	1	0	1	1	1	0	1	1	1	11.4	11.4	11.4	12.513	114	114;171;172;263;192	0	5.3415		By MS/MS	By MS/MS	By MS/MS	0.08282	0.098741	53.687	3	3	Median	NaN	NaN	NaN	NaN	NaN	NaN	NaN	NaN
A0A1B0GSQ6;A0A1B0GS68;P19253;A0A1B0GTA1;A0A1B0GSB2;A0A1B0GSC2;A0A1B0GT00;A0A140T8K2;A0A1B0GQW6;A0A1B0GSJ2;A0A1B0GRH1;A0A1B0GSF0;A0A1B0GSL5	A0A1B0GSQ6;A0A1B0GS68;P19253;A0A1B0GTA1;A0A1B0GSB2;A0A1B0GSC2;A0A1B0GT00	11;11;11;10;9;7;7;5;4;4;4;4;2	11;11;11;10;9;7;7;5;4;4;4;4;2	11;11;11;10;9;7;7;5;4;4;4;4;2	60S ribosomal protein L13a	Rpl13a	tr|A0A1B0GSQ6|A0A1B0GSQ6_MOUSE 60S ribosomal protein L13a (Fragment) OS=Mus musculus OX=10090 GN=Rpl13a PE=3 SV=1;tr|A0A1B0GS68|A0A1B0GS68_MOUSE Uncharacterized protein OS=Mus musculus OX=10090 GN=Gm45713 PE=2 SV=1;sp|P19253|RL13A_MOUSE 60S ribosomal prote	13	11	11	11	10	9	9	6	10	9	9	6	10	9	9	6	47.3	47.3	47.3	19.031	167	167;446;203;177;148;122;133;203;70;110;128;131;110	0	41.353	By MS/MS	By MS/MS	By MS/MS	By MS/MS	0.54136	0.88526	20.854	35	15	Leave out requantified	0.5077	0.53879	0.62445	0.64851	0.71809	0.90365	0.91329	0.79856
A0A1B0GSG5;Q91VI7;A0A1B0GRG4;A0A1B0GRY7	A0A1B0GSG5;Q91VI7	11;11;5;3	11;11;5;3	11;11;5;3	Ribonuclease inhibitor	Rnh1	tr|A0A1B0GSG5|A0A1B0GSG5_MOUSE Ribonuclease inhibitor OS=Mus musculus OX=10090 GN=Rnh1 PE=1 SV=1;sp|Q91VI7|RINI_MOUSE Ribonuclease inhibitor OS=Mus musculus OX=10090 GN=Rnh1 PE=1 SV=1	4	11	11	11	8	6	6	7	8	6	6	7	8	6	6	7	31.1	31.1	31.1	53.926	492	492;456;199;120	0	41.386	By MS/MS	By MS/MS	By MS/MS	By MS/MS	0.77821	1.07	20.68	25	17	Leave out requantified	0.79554	0.44037	0.42925	0.7771	1.0867	0.62083	0.54294	0.93647
A0A1B0GSM1;Q99K23;A0A1B0GSY4;A0A1B0GRT2;A0A1B0GSK1	A0A1B0GSM1;Q99K23;A0A1B0GSY4;A0A1B0GRT2;A0A1B0GSK1	2;2;1;1;1	2;2;1;1;1	2;2;1;1;1	Ufm1-specific protease 2	Ufsp2	tr|A0A1B0GSM1|A0A1B0GSM1_MOUSE Ufm1-specific protease 2 OS=Mus musculus OX=10090 GN=Ufsp2 PE=1 SV=1;sp|Q99K23|UFSP2_MOUSE Ufm1-specific protease 2 OS=Mus musculus OX=10090 GN=Ufsp2 PE=1 SV=1;tr|A0A1B0GSY4|A0A1B0GSY4_MOUSE Ufm1-specific protease 2 OS=Mus mu	5	2	2	2	0	1	0	1	0	1	0	1	0	1	0	1	8.1	8.1	8.1	24.181	211	211;461;81;91;117	0	3.3004		By MS/MS		By MS/MS	0.25022	0.30889	148.72	2	2	Median	NaN	NaN	NaN	NaN	NaN	NaN	NaN	NaN
D3Z0B9;A0A1B0GSU0;Q571I9	D3Z0B9;A0A1B0GSU0;Q571I9	2;2;2	2;2;2	2;2;2	Aldehyde dehydrogenase family 16 member A1	Aldh16a1	tr|D3Z0B9|D3Z0B9_MOUSE Aldehyde dehydrogenase family 16 member A1 OS=Mus musculus OX=10090 GN=Aldh16a1 PE=1 SV=3;tr|A0A1B0GSU0|A0A1B0GSU0_MOUSE Aldehyde dehydrogenase family 16 member A1 OS=Mus musculus OX=10090 GN=Aldh16a1 PE=1 SV=1;sp|Q571I9|A16A1_MOUSE	3	2	2	2	0	1	0	1	0	1	0	1	0	1	0	1	2.9	2.9	2.9	79.488	754	754;802;802	0	4.8999		By MS/MS		By MS/MS	NaN	NaN	NaN	1	1	Median	NaN	NaN	NaN	NaN	NaN	NaN	NaN	NaN
Q564E2;A0A1B0GSX0;P06151;A0A1B0GSR9;D3YZQ9;A0A1B0GT41;A0A1B0GQX5;A0A1B0GSL7;A0A1B0GRW9;A0A1B0GS79;A0A1B0GRC1;A0A1B0GRS2;A0A0N4SVV8;D3Z7F0;D3YVR7;D3YZE4;P00342;P16125;A0A1B0GSR2;A0A1B0GRE9	Q564E2;A0A1B0GSX0;P06151;A0A1B0GSR9;D3YZQ9;A0A1B0GT41;A0A1B0GQX5	16;16;16;14;11;9;9;7;4;4;2;2;2;2;2;2;2;2;1;1	16;16;16;14;11;9;9;7;4;4;2;2;2;2;2;2;2;2;1;1	16;16;16;14;11;9;9;7;4;4;2;2;2;2;2;2;2;2;1;1	L-lactate dehydrogenase;L-lactate dehydrogenase A chain	Ldha	tr|Q564E2|Q564E2_MOUSE L-lactate dehydrogenase OS=Mus musculus OX=10090 GN=Ldha PE=1 SV=1;tr|A0A1B0GSX0|A0A1B0GSX0_MOUSE L-lactate dehydrogenase OS=Mus musculus OX=10090 GN=Ldha PE=1 SV=1;sp|P06151|LDHA_MOUSE L-lactate dehydrogenase A chain OS=Mus musculus	20	16	16	16	12	13	13	13	12	13	13	13	12	13	13	13	42.5	42.5	42.5	36.498	332	332;361;332;315;236;176;201;128;104;205;66;68;193;198;235;237;332;334;171;274	0	138.05	By MS/MS	By MS/MS	By MS/MS	By MS/MS	0.58717	0.88224	11.254	84	10	Leave out requantified	0.61039	0.53449	0.56829	0.73143	0.86506	0.90713	0.829	0.90247
A0A1B0GSX6;O70209	A0A1B0GSX6;O70209	1;1	1;1	1;1	PDZ and LIM domain protein 3	Pdlim3	tr|A0A1B0GSX6|A0A1B0GSX6_MOUSE PDZ and LIM domain 3, isoform CRA_a OS=Mus musculus OX=10090 GN=Pdlim3 PE=1 SV=1;sp|O70209|PDLI3_MOUSE PDZ and LIM domain protein 3 OS=Mus musculus OX=10090 GN=Pdlim3 PE=1 SV=1	2	1	1	1	1	0	0	1	1	0	0	1	1	0	0	1	4.1	4.1	4.1	39.288	364	364;316	0	3.186	By MS/MS			By MS/MS	0.22996	0.30685	11.029	2	2	Median	NaN	NaN	NaN	NaN	NaN	NaN	NaN	NaN
A0A1B0GSX7;Q6PFD9	A0A1B0GSX7;Q6PFD9	1;1	1;1	1;1	Nuclear pore complex protein Nup98-Nup96;Nuclear pore complex protein Nup98;Nuclear pore complex protein Nup96	Nup98	tr|A0A1B0GSX7|A0A1B0GSX7_MOUSE Nuclear pore complex protein Nup98-Nup96 OS=Mus musculus OX=10090 GN=Nup98 PE=1 SV=1;sp|Q6PFD9|NUP98_MOUSE Nuclear pore complex protein Nup98-Nup96 OS=Mus musculus OX=10090 GN=Nup98 PE=1 SV=2	2	1	1	1	0	1	1	1	0	1	1	1	0	1	1	1	0.8	0.8	0.8	197.31	1816	1816;1816	0	2.8857		By MS/MS	By MS/MS	By MS/MS	NaN	NaN	NaN	1	1	Median	NaN	NaN	NaN	NaN	NaN	NaN	NaN	NaN
A0A1B0GTA0;D3YWS7;F6SJM7;Q8R2K1	A0A1B0GTA0;D3YWS7;F6SJM7;Q8R2K1	1;1;1;1	1;1;1;1	1;1;1;1	Fucose mutarotase	Fuom	tr|A0A1B0GTA0|A0A1B0GTA0_MOUSE Fucose mutarotase (Fragment) OS=Mus musculus OX=10090 GN=Fuom PE=1 SV=1;tr|D3YWS7|D3YWS7_MOUSE Fucose mutarotase OS=Mus musculus OX=10090 GN=Fuom PE=1 SV=1;tr|F6SJM7|F6SJM7_MOUSE Fucose mutarotase (Fragment) OS=Mus musculus O	4	1	1	1	0	0	1	1	0	0	1	1	0	0	1	1	21.8	21.8	21.8	5.6064	55	55;134;156;153	0	3.3737			By MS/MS	By MS/MS	NaN	NaN	NaN	1	1	Median	NaN	NaN	NaN	NaN	NaN	NaN	NaN	NaN
G3UYQ2;A0A1B0GX81;G3UZT6;Q3UF95;Q9Z1R2;G3UXT8;G3UYZ0;G3V013	G3UYQ2;A0A1B0GX81;G3UZT6;Q3UF95;Q9Z1R2;G3UXT8	8;8;8;8;8;5;2;2	8;8;8;8;8;5;2;2	8;8;8;8;8;5;2;2	Large proline-rich protein BAG6	Bag6	tr|G3UYQ2|G3UYQ2_MOUSE Large proline-rich protein BAG6 OS=Mus musculus OX=10090 GN=Bag6 PE=1 SV=1;tr|A0A1B0GX81|A0A1B0GX81_MOUSE Large proline-rich protein BAG6 (Fragment) OS=Mus musculus OX=10090 GN=Bag6 PE=1 SV=1;tr|G3UZT6|G3UZT6_MOUSE Large proline-rich	8	8	8	8	5	6	5	6	5	6	5	6	5	6	5	6	8.5	8.5	8.5	113.37	1082	1082;1107;1122;1136;1154;563;209;253	0	26.643	By MS/MS	By MS/MS	By MS/MS	By MS/MS	0.14387	0.20042	99.113	13	13	Median	0.3161	0.18801	0.49949	0.12389	0.44034	0.22415	0.55542	0.15836
A0A1D5RL92;G5E8I8;Q8CGZ0	A0A1D5RL92;G5E8I8;Q8CGZ0	3;3;3	3;3;3	3;3;3	Calcium homeostasis endoplasmic reticulum protein	Cherp	tr|A0A1D5RL92|A0A1D5RL92_MOUSE Calcium homeostasis endoplasmic reticulum protein OS=Mus musculus OX=10090 GN=Cherp PE=1 SV=1;tr|G5E8I8|G5E8I8_MOUSE Calcium homeostasis endoplasmic reticulum protein OS=Mus musculus OX=10090 GN=Cherp PE=1 SV=2;sp|Q8CGZ0|CHER	3	3	3	3	1	1	1	2	1	1	1	2	1	1	1	2	3.7	3.7	3.7	106.41	938	938;949;936	0	3.2101	By MS/MS	By matching	By MS/MS	By MS/MS	0.77435	1.2072	82.911	4	1	Median	NaN	NaN	NaN	0.45048	NaN	NaN	NaN	0.55953
A0A1D5RM74;A0A1D5RLE4;O54833;A0A1D5RM55	A0A1D5RM74;A0A1D5RLE4;O54833	3;3;3;1	3;3;3;1	3;3;3;1	Casein kinase II subunit alpha	Csnk2a2	tr|A0A1D5RM74|A0A1D5RM74_MOUSE Casein kinase II subunit alpha (Fragment) OS=Mus musculus OX=10090 GN=Csnk2a2 PE=1 SV=1;tr|A0A1D5RLE4|A0A1D5RLE4_MOUSE Casein kinase II subunit alpha (Fragment) OS=Mus musculus OX=10090 GN=Csnk2a2 PE=1 SV=1;sp|O54833|CSK22_	4	3	3	3	0	3	3	0	0	3	3	0	0	3	3	0	17	17	17	27.878	235	235;238;350;121	0	3.8034		By MS/MS	By MS/MS		0.64279	1.0025	86.729	6	3	Median	NaN	0.59458	0.69492	NaN	NaN	0.98049	1.025	NaN
A0A1D5RLY6;Q8C052	A0A1D5RLY6;Q8C052	4;4	4;4	4;4	Microtubule-associated protein 1S;MAP1S heavy chain;MAP1S light chain	Map1s	tr|A0A1D5RLY6|A0A1D5RLY6_MOUSE Microtubule-associated protein 1S OS=Mus musculus OX=10090 GN=Map1s PE=1 SV=1;sp|Q8C052|MAP1S_MOUSE Microtubule-associated protein 1S OS=Mus musculus OX=10090 GN=Map1s PE=1 SV=2	2	4	4	4	2	3	4	3	2	3	4	3	2	3	4	3	4.4	4.4	4.4	91.025	864	864;973	0	9.9663	By MS/MS	By MS/MS	By MS/MS	By MS/MS	NaN	NaN	NaN	1	1	Median	NaN	NaN	NaN	NaN	NaN	NaN	NaN	NaN
A0A1D5RM85;P62717;A0A1D5RLW5;A0A1D5RME4;A0A1D5RM79;A0A1D5RMC7	A0A1D5RM85;P62717;A0A1D5RLW5;A0A1D5RME4;A0A1D5RM79	9;9;8;7;5;2	9;9;8;7;5;2	9;9;8;7;5;2	60S ribosomal protein L18a	Rpl18a	tr|A0A1D5RM85|A0A1D5RM85_MOUSE 60S ribosomal protein L18a (Fragment) OS=Mus musculus OX=10090 GN=Rpl18a PE=1 SV=1;sp|P62717|RL18A_MOUSE 60S ribosomal protein L18a OS=Mus musculus OX=10090 GN=Rpl18a PE=1 SV=1;tr|A0A1D5RLW5|A0A1D5RLW5_MOUSE 60S ribosomal pro	6	9	9	9	6	8	9	6	6	8	9	6	6	8	9	6	36.1	36.1	36.1	24.638	219	219;176;147;123;109;70	0	58.082	By MS/MS	By MS/MS	By MS/MS	By MS/MS	0.67521	0.95357	2.5939	30	7	Leave out requantified	0.67484	0.57912	0.66044	0.76617	0.9513	0.96519	0.96038	0.95004
A0A1D5RMD8;Q6ZQ08;B7ZWL1;A0A1D5RMJ8;A0A1D5RML9	A0A1D5RMD8;Q6ZQ08;B7ZWL1;A0A1D5RMJ8	5;5;4;4;2	5;5;4;4;2	5;5;4;4;2	CCR4-NOT transcription complex subunit 1	Cnot1	tr|A0A1D5RMD8|A0A1D5RMD8_MOUSE CCR4-NOT transcription complex subunit 1 OS=Mus musculus OX=10090 GN=Cnot1 PE=1 SV=1;sp|Q6ZQ08|CNOT1_MOUSE CCR4-NOT transcription complex subunit 1 OS=Mus musculus OX=10090 GN=Cnot1 PE=1 SV=2;tr|B7ZWL1|B7ZWL1_MOUSE CCR4-NOT t	5	5	5	5	3	3	1	5	3	3	1	5	3	3	1	5	3.9	3.9	3.9	180.25	1614	1614;2375;2326;2369;823	0	10.02	By MS/MS	By MS/MS	By MS/MS	By MS/MS	1.0906	1.4487	11.86	10	6	Leave out requantified	0.68071	0.81663	NaN	0.68228	0.94261	1.3648	NaN	0.84588
A0A1I7Q4G8;E9QMN5;Q8CHY6	A0A1I7Q4G8;E9QMN5;Q8CHY6	1;1;1	1;1;1	1;1;1	Transcriptional repressor p66 alpha	Gatad2a	tr|A0A1I7Q4G8|A0A1I7Q4G8_MOUSE Transcriptional repressor p66 alpha OS=Mus musculus OX=10090 GN=Gatad2a PE=1 SV=1;tr|E9QMN5|E9QMN5_MOUSE Transcriptional repressor p66 alpha OS=Mus musculus OX=10090 GN=Gatad2a PE=1 SV=1;sp|Q8CHY6|P66A_MOUSE Transcriptional r	3	1	1	1	1	0	0	0	1	0	0	0	1	0	0	0	1.8	1.8	1.8	65.434	614	614;630;629	0	4.2391	By MS/MS				NaN	NaN	NaN	0	0	Median	NaN	NaN	NaN	NaN	NaN	NaN	NaN	NaN
E9PUM4;A0A1L1SQ51;Q71LX4;Q8CDM9;A0A1L1SRI1	E9PUM4;A0A1L1SQ51;Q71LX4;Q8CDM9;A0A1L1SRI1	5;5;5;3;3	1;1;1;1;1	1;1;1;1;1	Talin-2	Tln2	tr|E9PUM4|E9PUM4_MOUSE Talin-2 OS=Mus musculus OX=10090 GN=Tln2 PE=1 SV=1;tr|A0A1L1SQ51|A0A1L1SQ51_MOUSE Talin-2 OS=Mus musculus OX=10090 GN=Tln2 PE=1 SV=1;sp|Q71LX4|TLN2_MOUSE Talin-2 OS=Mus musculus OX=10090 GN=Tln2 PE=1 SV=3;tr|Q8CDM9|Q8CDM9_MOUSE Talin	5	5	1	1	3	3	4	4	1	0	0	1	1	0	0	1	1.9	0.3	0.3	271.66	2542	2542;2544;2375;1452;1471	1	-2	By matching	By matching	By matching	By MS/MS	0.67435	0.88922	4.3722	2	0	Median	NaN	NaN	NaN	NaN	NaN	NaN	NaN	NaN
A0A1L1SSE2;A0A1L1SQA7;A0A1L1SS47;A0A1L1SQF2;Q8BH15	A0A1L1SSE2;A0A1L1SQA7;A0A1L1SS47;A0A1L1SQF2;Q8BH15	1;1;1;1;1	1;1;1;1;1	1;1;1;1;1	CCR4-NOT transcription complex subunit 10	Cnot10	tr|A0A1L1SSE2|A0A1L1SSE2_MOUSE CCR4-NOT transcription complex subunit 10 OS=Mus musculus OX=10090 GN=Cnot10 PE=1 SV=1;tr|A0A1L1SQA7|A0A1L1SQA7_MOUSE CCR4-NOT transcription complex subunit 10 OS=Mus musculus OX=10090 GN=Cnot10 PE=1 SV=1;tr|A0A1L1SS47|A0A1L1	5	1	1	1	1	1	1	1	1	1	1	1	1	1	1	1	11.4	11.4	11.4	11.523	105	105;289;405;409;744	0	3.6431	By MS/MS	By MS/MS	By MS/MS	By MS/MS	1.0208	1.3943	9.196	4	4	Median	NaN	NaN	NaN	NaN	NaN	NaN	NaN	NaN
A0A1L1SQA8;P62852	A0A1L1SQA8;P62852	5;5	5;5	5;5	40S ribosomal protein S25	Rps25	tr|A0A1L1SQA8|A0A1L1SQA8_MOUSE 40S ribosomal protein S25 OS=Mus musculus OX=10090 GN=Rps25 PE=1 SV=1;sp|P62852|RS25_MOUSE 40S ribosomal protein S25 OS=Mus musculus OX=10090 GN=Rps25 PE=1 SV=1	2	5	5	5	5	4	4	5	5	4	4	5	5	4	4	5	49.5	49.5	49.5	10.309	93	93;125	0	12.316	By MS/MS	By MS/MS	By MS/MS	By MS/MS	0.7339	1.0494	9.8372	14	6	Leave out requantified	0.2069	0.71703	0.77288	0.784	0.28939	1.2005	1.1177	0.96487
A0A1L1SQC5;F7ATH5;Q8R2Y2	A0A1L1SQC5;F7ATH5;Q8R2Y2	1;1;1	1;1;1	1;1;1	Cell surface glycoprotein MUC18	Mcam	tr|A0A1L1SQC5|A0A1L1SQC5_MOUSE Cell surface glycoprotein MUC18 (Fragment) OS=Mus musculus OX=10090 GN=Mcam PE=1 SV=1;tr|F7ATH5|F7ATH5_MOUSE Cell surface glycoprotein MUC18 (Fragment) OS=Mus musculus OX=10090 GN=Mcam PE=1 SV=1;sp|Q8R2Y2|MUC18_MOUSE Cell sur	3	1	1	1	0	0	0	1	0	0	0	1	0	0	0	1	14.8	14.8	14.8	15.999	142	142;149;648	0.0084507	1.585				By MS/MS	NaN	NaN	NaN	0	0	Median	NaN	NaN	NaN	NaN	NaN	NaN	NaN	NaN
A0A1L1SU24;A0A1L1STN5;A0A1L1SRY8;A0A1L1SSY9;Q9DCU6	A0A1L1SU24;A0A1L1STN5;A0A1L1SRY8;A0A1L1SSY9;Q9DCU6	1;1;1;1;1	1;1;1;1;1	1;1;1;1;1	39S ribosomal protein L4, mitochondrial	Mrpl4	tr|A0A1L1SU24|A0A1L1SU24_MOUSE 39S ribosomal protein L4, mitochondrial OS=Mus musculus OX=10090 GN=Mrpl4 PE=1 SV=1;tr|A0A1L1STN5|A0A1L1STN5_MOUSE 39S ribosomal protein L4, mitochondrial OS=Mus musculus OX=10090 GN=Mrpl4 PE=1 SV=1;tr|A0A1L1SRY8|A0A1L1SRY8_M	5	1	1	1	1	1	1	1	1	1	1	1	1	1	1	1	10	10	10	18.081	160	160;172;219;264;294	0	3.4666	By MS/MS	By MS/MS	By MS/MS	By MS/MS	0.21788	0.28079	17.556	4	4	Median	NaN	NaN	NaN	NaN	NaN	NaN	NaN	NaN
Q3UDS7;A0A1L1SSF2;Q8VDL4	Q3UDS7;A0A1L1SSF2;Q8VDL4	4;4;4	4;4;4	4;4;4	ADP-dependent glucokinase	Adpgk	tr|Q3UDS7|Q3UDS7_MOUSE ADP-dependent glucokinase OS=Mus musculus OX=10090 GN=Adpgk PE=1 SV=1;tr|A0A1L1SSF2|A0A1L1SSF2_MOUSE ADP-dependent glucokinase OS=Mus musculus OX=10090 GN=Adpgk PE=1 SV=1;sp|Q8VDL4|ADPGK_MOUSE ADP-dependent glucokinase OS=Mus musculu	3	4	4	4	2	2	3	1	2	2	3	1	2	2	3	1	13.7	13.7	13.7	53.788	495	495;496;496	0	8.0141	By MS/MS	By MS/MS	By MS/MS	By MS/MS	0.57572	0.86355	89.94	5	1	Median	0.23403	NaN	NaN	NaN	0.32738	NaN	NaN	NaN
A0A1L1SSF8;Q91V76	A0A1L1SSF8;Q91V76	1;1	1;1	1;1	Ester hydrolase C11orf54 homolog		tr|A0A1L1SSF8|A0A1L1SSF8_MOUSE RIKEN cDNA 4931406C07 gene OS=Mus musculus OX=10090 GN=4931406C07Rik PE=1 SV=1;sp|Q91V76|CK054_MOUSE Ester hydrolase C11orf54 homolog OS=Mus musculus OX=10090 PE=1 SV=1	2	1	1	1	1	1	1	1	1	1	1	1	1	1	1	1	5.7	5.7	5.7	31.334	282	282;315	0.0057887	1.7559	By MS/MS	By MS/MS	By MS/MS	By MS/MS	0.81317	1.1852	9.9268	4	0	Median	NaN	NaN	NaN	NaN	NaN	NaN	NaN	NaN
Q5NCU3;Q5NCU4;A0A1L1SSH9;P07214	Q5NCU3;Q5NCU4;A0A1L1SSH9;P07214	1;1;1;1	1;1;1;1	1;1;1;1	SPARC	Sparc	tr|Q5NCU3|Q5NCU3_MOUSE SPARC (Fragment) OS=Mus musculus OX=10090 GN=Sparc PE=1 SV=1;tr|Q5NCU4|Q5NCU4_MOUSE SPARC OS=Mus musculus OX=10090 GN=Sparc PE=1 SV=1;tr|A0A1L1SSH9|A0A1L1SSH9_MOUSE SPARC OS=Mus musculus OX=10090 GN=Sparc PE=1 SV=1;sp|P07214|SPRC_MOU	4	1	1	1	0	0	0	1	0	0	0	1	0	0	0	1	9.3	9.3	9.3	19.095	172	172;301;332;302	0	2.9299				By MS/MS	NaN	NaN	NaN	0	0	Median	NaN	NaN	NaN	NaN	NaN	NaN	NaN	NaN
A0A1L1SSJ7;P23780	A0A1L1SSJ7;P23780	1;1	1;1	1;1	Beta-galactosidase	Glb1	tr|A0A1L1SSJ7|A0A1L1SSJ7_MOUSE Beta-galactosidase OS=Mus musculus OX=10090 GN=Glb1 PE=1 SV=1;sp|P23780|BGAL_MOUSE Beta-galactosidase OS=Mus musculus OX=10090 GN=Glb1 PE=1 SV=1	2	1	1	1	0	1	1	0	0	1	1	0	0	1	1	0	4.1	4.1	4.1	32.928	291	291;647	0	3.4911		By MS/MS	By MS/MS		0.044755	0.051531	47.668	2	2	Median	NaN	NaN	NaN	NaN	NaN	NaN	NaN	NaN
A0A1L1SSU2;A0A1N9M8A6;Q9CXV9	A0A1L1SSU2;A0A1N9M8A6;Q9CXV9	1;1;1	1;1;1	1;1;1	DCN1-like protein 5	Dcun1d5	tr|A0A1L1SSU2|A0A1L1SSU2_MOUSE DCN1-like protein (Fragment) OS=Mus musculus OX=10090 GN=Dcun1d5 PE=1 SV=1;tr|A0A1N9M8A6|A0A1N9M8A6_MOUSE DCN1-like protein OS=Mus musculus OX=10090 GN=Dcun1d5 PE=1 SV=1;sp|Q9CXV9|DCNL5_MOUSE DCN1-like protein 5 OS=Mus muscul	3	1	1	1	0	1	1	0	0	1	1	0	0	1	1	0	6.1	6.1	6.1	17.223	147	147;255;237	0.0048473	1.7947		By MS/MS	By MS/MS		0.034157	0.039329	65.623	2	2	Median	NaN	NaN	NaN	NaN	NaN	NaN	NaN	NaN
A0A1L1STC8;A0A1L1SU53;Q9Z0P5	A0A1L1STC8;A0A1L1SU53;Q9Z0P5	3;3;3	2;2;2	2;2;2	Twinfilin-2	Twf2	tr|A0A1L1STC8|A0A1L1STC8_MOUSE Twinfilin-2 (Fragment) OS=Mus musculus OX=10090 GN=Twf2 PE=1 SV=1;tr|A0A1L1SU53|A0A1L1SU53_MOUSE Twinfilin-2 (Fragment) OS=Mus musculus OX=10090 GN=Twf2 PE=1 SV=1;sp|Q9Z0P5|TWF2_MOUSE Twinfilin-2 OS=Mus musculus OX=10090 GN=T	3	3	2	2	3	1	1	2	2	0	0	1	2	0	0	1	19.8	16.4	16.4	23.658	207	207;235;349	0	5.7708	By MS/MS	By matching	By matching	By MS/MS	NaN	NaN	NaN	1	1	Median	NaN	NaN	NaN	NaN	NaN	NaN	NaN	NaN
Q45VK5;A0A1L1STE4;Q9Z1X4;A0A1L1SU19	Q45VK5;A0A1L1STE4;Q9Z1X4	7;7;7;1	7;7;7;1	7;7;7;1	Interleukin enhancer-binding factor 3	Ilf3	tr|Q45VK5|Q45VK5_MOUSE Interleukin enhancer-binding factor 3 OS=Mus musculus OX=10090 GN=Ilf3 PE=1 SV=1;tr|A0A1L1STE4|A0A1L1STE4_MOUSE Interleukin enhancer-binding factor 3 OS=Mus musculus OX=10090 GN=Ilf3 PE=1 SV=1;sp|Q9Z1X4|ILF3_MOUSE Interleukin enhance	4	7	7	7	3	3	3	5	3	3	3	5	3	3	3	5	11.2	11.2	11.2	76.347	703	703;908;898;126	0	15.207	By MS/MS	By MS/MS	By MS/MS	By MS/MS	0.47235	0.57057	147.73	11	7	Median	0.22224	0.74175	0.56804	0.47235	0.30996	1.25	0.77652	0.57057
A0A1L1STE6;Q9D6R2	A0A1L1STE6;Q9D6R2	7;7	7;7	7;7	Isocitrate dehydrogenase [NAD] subunit alpha, mitochondrial	Idh3a	tr|A0A1L1STE6|A0A1L1STE6_MOUSE Isocitrate dehydrogenase [NAD] subunit, mitochondrial OS=Mus musculus OX=10090 GN=Idh3a PE=1 SV=1;sp|Q9D6R2|IDH3A_MOUSE Isocitrate dehydrogenase [NAD] subunit alpha, mitochondrial OS=Mus musculus OX=10090 GN=Idh3a PE=1 SV=1	2	7	7	7	6	4	4	6	6	4	4	6	6	4	4	6	17.4	17.4	17.4	41.52	384	384;366	0	26.764	By MS/MS	By MS/MS	By MS/MS	By MS/MS	0.67429	0.94091	13.689	17	9	Leave out requantified	0.56912	0.50459	0.5785	0.81297	0.79282	0.84654	0.83679	0.99585
A0A1L1STF4;Q6GU68	A0A1L1STF4;Q6GU68	1;1	1;1	1;1	Immunoglobulin superfamily containing leucine-rich repeat protein	Islr	tr|A0A1L1STF4|A0A1L1STF4_MOUSE Immunoglobulin superfamily-containing leucine-rich repeat protein (Fragment) OS=Mus musculus OX=10090 GN=Islr PE=1 SV=1;sp|Q6GU68|ISLR_MOUSE Immunoglobulin superfamily containing leucine-rich repeat protein OS=Mus musculus OX	2	1	1	1	1	0	1	1	1	0	1	1	1	0	1	1	9.3	9.3	9.3	16.401	150	150;428	0.0044444	1.9199	By MS/MS		By matching	By matching	0.44985	0.56986	32.626	3	0	Plateau	NaN	NaN	NaN	NaN	NaN	NaN	NaN	NaN
A0A1L1SV73;Q8BY87	A0A1L1SV73;Q8BY87	3;2	3;2	3;2	Ubiquitin carboxyl-terminal hydrolase 47	Usp47	tr|A0A1L1SV73|A0A1L1SV73_MOUSE Ubiquitin carboxyl-terminal hydrolase 47 OS=Mus musculus OX=10090 GN=Usp47 PE=1 SV=1;sp|Q8BY87|UBP47_MOUSE Ubiquitin carboxyl-terminal hydrolase 47 OS=Mus musculus OX=10090 GN=Usp47 PE=1 SV=2	2	3	3	3	0	1	0	2	0	1	0	2	0	1	0	2	2.5	2.5	2.5	157.15	1376	1376;1376	0	3.4681		By MS/MS		By MS/MS	0.6727	0.8206	0.0073241	2	1	Median	NaN	NaN	NaN	0.6727	NaN	NaN	NaN	0.8206
A0A1L1SVK0;Q61206;A0A1L1SQ76;A0A1L1SRD0;A0A1L1SQV7	A0A1L1SVK0;Q61206;A0A1L1SQ76;A0A1L1SRD0;A0A1L1SQV7	2;2;1;1;1	2;2;1;1;1	2;2;1;1;1	Platelet-activating factor acetylhydrolase IB subunit beta	Pafah1b2	tr|A0A1L1SVK0|A0A1L1SVK0_MOUSE Platelet-activating factor acetylhydrolase IB subunit beta (Fragment) OS=Mus musculus OX=10090 GN=Pafah1b2 PE=1 SV=1;sp|Q61206|PA1B2_MOUSE Platelet-activating factor acetylhydrolase IB subunit beta OS=Mus musculus OX=10090 GN	5	2	2	2	2	2	2	1	2	2	2	1	2	2	2	1	14.2	14.2	14.2	22.056	197	197;229;88;97;107	0	6.7845	By MS/MS	By MS/MS	By MS/MS	By MS/MS	0.052953	0.064147	17.864	7	7	Median	0.055774	0.056813	0.05378	NaN	0.077695	0.067735	0.059801	NaN
A0A1S6GWJ4;Q91VN6	A0A1S6GWJ4;Q91VN6	2;2	2;2	2;2	Probable ATP-dependent RNA helicase DDX41	Ddx41	tr|A0A1S6GWJ4|A0A1S6GWJ4_MOUSE DEAD (Asp-Glu-Ala-Asp) box polypeptide 41 OS=Mus musculus OX=10090 GN=Ddx41 PE=1 SV=1;sp|Q91VN6|DDX41_MOUSE Probable ATP-dependent RNA helicase DDX41 OS=Mus musculus OX=10090 GN=Ddx41 PE=1 SV=2	2	2	2	2	2	1	2	2	2	1	2	2	2	1	2	2	4.9	4.9	4.9	71.1	633	633;622	0	5.488	By MS/MS	By MS/MS	By MS/MS	By MS/MS	0.69591	0.8444	15.112	3	0	Median	NaN	NaN	NaN	NaN	NaN	NaN	NaN	NaN
A0A1W2P6F6;A0A1W2P7Q9;Q60605;A0A1W2P6G5;Q8CI43	A0A1W2P6F6;A0A1W2P7Q9;Q60605;A0A1W2P6G5	9;9;9;7;1	9;9;9;7;1	9;9;9;7;1	Myosin light polypeptide 6	Myl6	tr|A0A1W2P6F6|A0A1W2P6F6_MOUSE Myosin light polypeptide 6 OS=Mus musculus OX=10090 GN=Myl6 PE=1 SV=1;tr|A0A1W2P7Q9|A0A1W2P7Q9_MOUSE Myosin light polypeptide 6 OS=Mus musculus OX=10090 GN=Myl6 PE=1 SV=1;sp|Q60605|MYL6_MOUSE Myosin light polypeptide 6 OS=Mus	5	9	9	9	8	7	7	7	8	7	7	7	8	7	7	7	61.2	61.2	61.2	17.005	152	152;158;151;139;207	0	54.061	By MS/MS	By MS/MS	By MS/MS	By MS/MS	0.78053	1.101	6.4286	31	10	Leave out requantified	0.80339	0.66658	0.73105	0.88376	1.1356	1.1118	1.0592	1.1014
E0CZ27;F8WI35;A0A1W2P768;P84244;P84228;P68433;P02301;E0CYN1;E0CYR7	E0CZ27;F8WI35;A0A1W2P768;P84244;P84228;P68433;P02301	3;3;3;3;3;3;3;1;1	3;3;3;3;3;3;3;1;1	3;3;3;3;3;3;3;1;1	Histone H3;Histone H3.3;Histone H3.2;Histone H3.1;Histone H3.3C	H3f3a;Hist1h3b;Hist1h3a;H3f3c	tr|E0CZ27|E0CZ27_MOUSE Histone H3 (Fragment) OS=Mus musculus OX=10090 GN=H3f3a PE=3 SV=1;tr|F8WI35|F8WI35_MOUSE Histone H3 OS=Mus musculus OX=10090 GN=H3f3a PE=1 SV=1;tr|A0A1W2P768|A0A1W2P768_MOUSE Histone H3.2 OS=Mus musculus OX=10090 GN=Hist2h3c1 PE=1 SV	9	3	3	3	3	3	3	3	3	3	3	3	3	3	3	3	19.3	19.3	19.3	13.322	119	119;135;181;136;136;136;136;52;55	0	6.7412	By MS/MS	By MS/MS	By MS/MS	By MS/MS	0.001427	0.0017014	325.59	13	10	Median	0.0012022	0.001427	0.0012252	0.0021078	0.0016747	0.0017014	0.0013624	0.0025025
Q6ZWZ6;F7AEH4;A0A1W2P7A1;P63323	Q6ZWZ6;F7AEH4;A0A1W2P7A1;P63323	9;9;9;8	9;9;9;8	9;9;9;8	40S ribosomal protein S12	Rps12	tr|Q6ZWZ6|Q6ZWZ6_MOUSE 40S ribosomal protein S12 OS=Mus musculus OX=10090 GN=Rps12-ps3 PE=1 SV=1;tr|F7AEH4|F7AEH4_MOUSE 40S ribosomal protein S12 OS=Mus musculus OX=10090 GN=Rps12 PE=1 SV=1;tr|A0A1W2P7A1|A0A1W2P7A1_MOUSE 40S ribosomal protein S12 OS=Mus mu	4	9	9	9	6	9	8	6	6	9	8	6	6	9	8	6	55.3	55.3	55.3	14.515	132	132;137;148;132	0	67.849	By MS/MS	By MS/MS	By MS/MS	By MS/MS	0.68916	1.0021	10.44	42	12	Leave out requantified	0.66532	0.61375	0.71284	0.77894	0.94056	1.0238	1.0387	0.96795
A0A1W2P7L7;P59708	A0A1W2P7L7;P59708	1;1	1;1	1;1	Splicing factor 3B subunit 6	Sf3b6	tr|A0A1W2P7L7|A0A1W2P7L7_MOUSE Splicing factor 3B subunit 6 (Fragment) OS=Mus musculus OX=10090 GN=Sf3b6 PE=1 SV=1;sp|P59708|SF3B6_MOUSE Splicing factor 3B subunit 6 OS=Mus musculus OX=10090 GN=Sf3b6 PE=1 SV=1	2	1	1	1	0	1	1	0	0	1	1	0	0	1	1	0	10.8	10.8	10.8	13.037	111	111;125	0	3.2539		By MS/MS	By MS/MS		0.62889	0.97177	6.4794	2	0	Median	NaN	NaN	NaN	NaN	NaN	NaN	NaN	NaN
A0A1W2P7Q6;Q9CRT8;A0A1W2P7V1	A0A1W2P7Q6;Q9CRT8	7;7;1	7;7;1	7;7;1	Exportin-T	Xpot	tr|A0A1W2P7Q6|A0A1W2P7Q6_MOUSE Exportin-T OS=Mus musculus OX=10090 GN=Xpot PE=1 SV=1;sp|Q9CRT8|XPOT_MOUSE Exportin-T OS=Mus musculus OX=10090 GN=Xpot PE=1 SV=3	3	7	7	7	1	2	4	5	1	2	4	5	1	2	4	5	9	9	9	109.79	962	962;963;206	0	12.605	By matching	By MS/MS	By MS/MS	By MS/MS	0.61548	0.82293	47.852	11	5	Leave out requantified	NaN	0.45326	0.70745	0.82198	NaN	0.61317	1.0143	1.0019
A0A1W2P7X0;E9QMV2;Q4KML4	A0A1W2P7X0;E9QMV2;Q4KML4	3;3;3	3;3;3	3;3;3	Costars family protein ABRACL	Abracl	tr|A0A1W2P7X0|A0A1W2P7X0_MOUSE Costars family protein ABRACL (Fragment) OS=Mus musculus OX=10090 GN=Abracl PE=1 SV=1;tr|E9QMV2|E9QMV2_MOUSE Costars family protein ABRACL OS=Mus musculus OX=10090 GN=Abracl PE=1 SV=1;sp|Q4KML4|ABRAL_MOUSE Costars family prot	3	3	3	3	1	3	2	1	1	3	2	1	1	3	2	1	66.7	66.7	66.7	6.4374	57	57;81;81	0	9.7801	By MS/MS	By MS/MS	By MS/MS	By MS/MS	0.47882	0.71871	57.589	12	7	Median	0.50337	0.30897	0.46773	0.69043	0.72908	0.43478	0.70533	0.83104
A0A1W2P7X3;Q9D358;Q561M1	A0A1W2P7X3;Q9D358;Q561M1	3;3;2	3;3;2	3;3;2	Low molecular weight phosphotyrosine protein phosphatase	Acp1	tr|A0A1W2P7X3|A0A1W2P7X3_MOUSE Low molecular weight phosphotyrosine protein phosphatase OS=Mus musculus OX=10090 GN=Acp1 PE=1 SV=1;sp|Q9D358|PPAC_MOUSE Low molecular weight phosphotyrosine protein phosphatase OS=Mus musculus OX=10090 GN=Acp1 PE=1 SV=3;tr|Q	3	3	3	3	2	0	1	1	2	0	1	1	2	0	1	1	28.1	28.1	28.1	12.562	114	114;158;158	0	10.888	By MS/MS		By MS/MS	By MS/MS	0.075632	0.10092	28.745	2	2	Median	NaN	NaN	NaN	NaN	NaN	NaN	NaN	NaN
A0A1W2P865;D3YXW1;Q9D945	A0A1W2P865;D3YXW1;Q9D945	1;1;1	1;1;1	1;1;1	Protein LLP homolog	Llph	tr|A0A1W2P865|A0A1W2P865_MOUSE Protein LLP homolog OS=Mus musculus OX=10090 GN=Llph PE=1 SV=1;tr|D3YXW1|D3YXW1_MOUSE MCG19223 OS=Mus musculus OX=10090 GN=Llph PE=1 SV=2;sp|Q9D945|LLPH_MOUSE Protein LLP homolog OS=Mus musculus OX=10090 GN=Llph PE=1 SV=1	3	1	1	1	1	1	1	1	1	1	1	1	1	1	1	1	15.8	15.8	15.8	8.7721	76	76;130;130	0.0010661	2.5271	By matching	By matching	By matching	By MS/MS	0.92722	1.1031	38.362	4	0	Linear	NaN	NaN	NaN	NaN	NaN	NaN	NaN	NaN
A0A1W2P8C6;P41731	A0A1W2P8C6;P41731	2;2	2;2	2;2	CD63 antigen	Cd63	tr|A0A1W2P8C6|A0A1W2P8C6_MOUSE Tetraspanin (Fragment) OS=Mus musculus OX=10090 GN=Cd63 PE=1 SV=1;sp|P41731|CD63_MOUSE CD63 antigen OS=Mus musculus OX=10090 GN=Cd63 PE=1 SV=2	2	2	2	2	2	2	2	2	2	2	2	2	2	2	2	2	11	11	11	17.865	164	164;238	0	8.9825	By MS/MS	By MS/MS	By MS/MS	By MS/MS	0.69181	0.98362	26.187	9	2	Leave out requantified	1.5809	0.49584	0.72956	0.57142	1.641	0.83101	1.0622	0.7024
A0A1Y7VL11;A0A1Y7VIZ6;Q9WV98	A0A1Y7VL11;A0A1Y7VIZ6;Q9WV98	1;1;1	1;1;1	1;1;1	Mitochondrial import inner membrane translocase subunit Tim9	Timm9	tr|A0A1Y7VL11|A0A1Y7VL11_MOUSE Mitochondrial import inner membrane translocase subunit Tim9 OS=Mus musculus OX=10090 GN=Timm9 PE=1 SV=1;tr|A0A1Y7VIZ6|A0A1Y7VIZ6_MOUSE Mitochondrial import inner membrane translocase subunit Tim9 OS=Mus musculus OX=10090 GN=	3	1	1	1	1	0	1	0	1	0	1	0	1	0	1	0	23.9	23.9	23.9	5.3721	46	46;61;89	0	3.3512	By MS/MS		By MS/MS		0.96095	1.3721	0.81829	2	2	Median	NaN	NaN	NaN	NaN	NaN	NaN	NaN	NaN
A0A1Y7VJ48;P48428	A0A1Y7VJ48;P48428	6;6	6;6	6;6	Tubulin-specific chaperone A	Tbca	tr|A0A1Y7VJ48|A0A1Y7VJ48_MOUSE Tubulin-specific chaperone A OS=Mus musculus OX=10090 GN=Tbca PE=1 SV=1;sp|P48428|TBCA_MOUSE Tubulin-specific chaperone A OS=Mus musculus OX=10090 GN=Tbca PE=1 SV=3	2	6	6	6	3	6	6	4	3	6	6	4	3	6	6	4	71.4	71.4	71.4	9.9271	84	84;108	0	19.231	By MS/MS	By MS/MS	By MS/MS	By MS/MS	0.71255	0.96807	15.653	19	4	Leave out requantified	0.66095	0.54998	0.76139	0.80217	0.95406	0.98677	1.1047	0.99062
A0A1Y7VJZ2;Q9WVL0;A0A1Y7VNC1	A0A1Y7VJZ2;Q9WVL0;A0A1Y7VNC1	3;3;2	3;3;2	3;3;2	Maleylacetoacetate isomerase	Gstz1	tr|A0A1Y7VJZ2|A0A1Y7VJZ2_MOUSE Glutathione transferase zeta 1 (Maleylacetoacetate isomerase), isoform CRA_c OS=Mus musculus OX=10090 GN=Gstz1 PE=1 SV=1;sp|Q9WVL0|MAAI_MOUSE Maleylacetoacetate isomerase OS=Mus musculus OX=10090 GN=Gstz1 PE=1 SV=1;tr|A0A1Y7V	3	3	3	3	3	2	2	1	3	2	2	1	3	2	2	1	17.7	17.7	17.7	24.205	215	215;216;161	0	8.209	By MS/MS	By MS/MS	By MS/MS	By MS/MS	0.59065	0.85765	85.93	9	7	Median	0.65848	0.27455	0.61635	NaN	0.91236	0.39097	0.85765	NaN
A0A1Y7VLD1;F8VPK5;A0A1Y7VMN0;P70336	A0A1Y7VLD1;F8VPK5;A0A1Y7VMN0;P70336	1;1;1;1	1;1;1;1	1;1;1;1	Rho-associated protein kinase;Rho-associated protein kinase 2	Rock2	tr|A0A1Y7VLD1|A0A1Y7VLD1_MOUSE Rho-associated protein kinase 2 (Fragment) OS=Mus musculus OX=10090 GN=Rock2 PE=1 SV=1;tr|F8VPK5|F8VPK5_MOUSE Rho-associated protein kinase OS=Mus musculus OX=10090 GN=Rock2 PE=1 SV=1;tr|A0A1Y7VMN0|A0A1Y7VMN0_MOUSE Rho-associ	4	1	1	1	0	0	1	0	0	0	1	0	0	0	1	0	3.8	3.8	3.8	30.079	262	262;1388;1444;1388	0.0043732	1.8139			By MS/MS		NaN	NaN	NaN	0	0	Median	NaN	NaN	NaN	NaN	NaN	NaN	NaN	NaN
A0A1Y7VLN4;E9QKQ5;Q91ZP3	A0A1Y7VLN4;E9QKQ5;Q91ZP3	1;1;1	1;1;1	1;1;1	Phosphatidate phosphatase LPIN1	Lpin1	tr|A0A1Y7VLN4|A0A1Y7VLN4_MOUSE Phosphatidate phosphatase LPIN1 OS=Mus musculus OX=10090 GN=Lpin1 PE=1 SV=1;tr|E9QKQ5|E9QKQ5_MOUSE Phosphatidate phosphatase LPIN1 OS=Mus musculus OX=10090 GN=Lpin1 PE=1 SV=2;sp|Q91ZP3|LPIN1_MOUSE Phosphatidate phosphatase LP	3	1	1	1	1	1	0	1	1	1	0	1	1	1	0	1	2.5	2.5	2.5	98.535	891	891;924;924	0.0020619	2.2517	By MS/MS	By MS/MS		By MS/MS	NaN	NaN	NaN	0	0	Median	NaN	NaN	NaN	NaN	NaN	NaN	NaN	NaN
A0A1Y7VLP0;P56379	A0A1Y7VLP0;P56379	1;1	1;1	1;1	6.8 kDa mitochondrial proteolipid	Mp68	tr|A0A1Y7VLP0|A0A1Y7VLP0_MOUSE RIKEN cDNA 2010107E04 gene (Fragment) OS=Mus musculus OX=10090 GN=Atp5mpl PE=1 SV=1;sp|P56379|68MP_MOUSE 6.8 kDa mitochondrial proteolipid OS=Mus musculus OX=10090 GN=Mp68 PE=1 SV=1	2	1	1	1	1	1	0	1	1	1	0	1	1	1	0	1	14	14	14	6.5608	57	57;58	0	3.3265	By MS/MS	By MS/MS		By MS/MS	0.67626	0.94185	19.454	4	1	Median	0.67626	NaN	NaN	NaN	0.96537	NaN	NaN	NaN
A0A1Y7VLY3;Q9QXK7;A0A1Y7VNI9;A0A1Y7VIZ9;A0A1Y7VJ97	A0A1Y7VLY3;Q9QXK7;A0A1Y7VNI9;A0A1Y7VIZ9;A0A1Y7VJ97	2;2;1;1;1	2;2;1;1;1	2;2;1;1;1	Cleavage and polyadenylation specificity factor subunit 3	Cpsf3	tr|A0A1Y7VLY3|A0A1Y7VLY3_MOUSE Cleavage and polyadenylation-specificity factor subunit 3 OS=Mus musculus OX=10090 GN=Cpsf3 PE=1 SV=1;sp|Q9QXK7|CPSF3_MOUSE Cleavage and polyadenylation specificity factor subunit 3 OS=Mus musculus OX=10090 GN=Cpsf3 PE=1 SV=2	5	2	2	2	1	1	0	1	1	1	0	1	1	1	0	1	6.6	6.6	6.6	58.236	512	512;684;28;241;247	0.0010799	2.6558	By MS/MS	By MS/MS		By MS/MS	NaN	NaN	NaN	1	1	Median	NaN	NaN	NaN	NaN	NaN	NaN	NaN	NaN
A0A1Y7VNF8;A0A1Y7VMH7;A0A1Y7VME9;E9Q9B7	A0A1Y7VNF8;A0A1Y7VMH7;A0A1Y7VME9;E9Q9B7	1;1;1;1	1;1;1;1	1;1;1;1		Kidins220	tr|A0A1Y7VNF8|A0A1Y7VNF8_MOUSE Kinase D-interacting substrate 220 (Fragment) OS=Mus musculus OX=10090 GN=Kidins220 PE=1 SV=1;tr|A0A1Y7VMH7|A0A1Y7VMH7_MOUSE Kinase D-interacting substrate 220 OS=Mus musculus OX=10090 GN=Kidins220 PE=1 SV=1;tr|A0A1Y7VME9|A0A	4	1	1	1	0	0	1	1	0	0	1	1	0	0	1	1	0.8	0.8	0.8	132.19	1182	1182;1672;1763;1793	0.0030257	2.0546			By MS/MS	By MS/MS	0.82047	0.97817	9.1386	2	2	Median	NaN	NaN	NaN	NaN	NaN	NaN	NaN	NaN
A0A1Y7VMH3;Q80X41	A0A1Y7VMH3;Q80X41	2;2	2;2	2;2	Serine/threonine-protein kinase VRK1	Vrk1	tr|A0A1Y7VMH3|A0A1Y7VMH3_MOUSE Serine/threonine-protein kinase VRK1 OS=Mus musculus OX=10090 GN=Vrk1 PE=1 SV=1;sp|Q80X41|VRK1_MOUSE Serine/threonine-protein kinase VRK1 OS=Mus musculus OX=10090 GN=Vrk1 PE=1 SV=2	2	2	2	2	1	2	1	1	1	2	1	1	1	2	1	1	9.7	9.7	9.7	46.845	413	413;440	0.0015823	2.4384	By MS/MS	By MS/MS	By matching	By matching	0.56018	0.82958	17.148	5	1	Median	NaN	0.55324	NaN	NaN	NaN	0.80504	NaN	NaN
A0A1Y7VN19;Q9CXR1	A0A1Y7VN19;Q9CXR1	1;1	1;1	1;1	Dehydrogenase/reductase SDR family member 7	Dhrs7	tr|A0A1Y7VN19|A0A1Y7VN19_MOUSE Dehydrogenase/reductase SDR family member 7 (Fragment) OS=Mus musculus OX=10090 GN=Dhrs7 PE=1 SV=1;sp|Q9CXR1|DHRS7_MOUSE Dehydrogenase/reductase SDR family member 7 OS=Mus musculus OX=10090 GN=Dhrs7 PE=1 SV=2	2	1	1	1	1	0	0	0	1	0	0	0	1	0	0	0	5.5	5.5	5.5	40.589	362	362;338	0	4.4551	By MS/MS				NaN	NaN	NaN	1	1	Median	NaN	NaN	NaN	NaN	NaN	NaN	NaN	NaN
A0A1Y7VN70;Q80Y14	A0A1Y7VN70;Q80Y14	2;2	2;2	2;2	Glutaredoxin-related protein 5, mitochondrial	Glrx5	tr|A0A1Y7VN70|A0A1Y7VN70_MOUSE Glutaredoxin-related protein 5, mitochondrial OS=Mus musculus OX=10090 GN=Glrx5 PE=1 SV=1;sp|Q80Y14|GLRX5_MOUSE Glutaredoxin-related protein 5, mitochondrial OS=Mus musculus OX=10090 GN=Glrx5 PE=1 SV=2	2	2	2	2	1	2	2	1	1	2	2	1	1	2	2	1	28	28	28	12.168	118	118;152	0	10.046	By MS/MS	By MS/MS	By MS/MS	By MS/MS	0.24194	0.33704	80.387	7	7	Median	0.18958	NaN	0.31423	0.23344	0.26409	NaN	0.34941	0.2984
A0A286YDR1;A0A286YDJ7;A0A286YDX4;A0A286YCQ1;A0A286YD88;A0A286YCE1;A0A286YED8;A0A286YDZ8;A0A286YCH3;A0A286YDB4;A0A286YDA9;A0A286YCS4;A0A286YCU2;A0A286YCX8;A0A286YD14;A0A286YD46;A0A286YDK8;F8VQC9;Q8BTY2	A0A286YDR1;A0A286YDJ7;A0A286YDX4;A0A286YCQ1;A0A286YD88;A0A286YCE1;A0A286YED8;A0A286YDZ8;A0A286YCH3;A0A286YDB4;A0A286YDA9;A0A286YCS4;A0A286YCU2;A0A286YCX8;A0A286YD14;A0A286YD46;A0A286YDK8;F8VQC9;Q8BTY2	1;1;1;1;1;1;1;1;1;1;1;1;1;1;1;1;1;1;1	1;1;1;1;1;1;1;1;1;1;1;1;1;1;1;1;1;1;1	1;1;1;1;1;1;1;1;1;1;1;1;1;1;1;1;1;1;1	Anion exchange protein;Sodium bicarbonate cotransporter 3	Slc4a7	tr|A0A286YDR1|A0A286YDR1_MOUSE Sodium bicarbonate cotransporter 3 (Fragment) OS=Mus musculus OX=10090 GN=Slc4a7 PE=1 SV=1;tr|A0A286YDJ7|A0A286YDJ7_MOUSE Anion exchange protein OS=Mus musculus OX=10090 GN=Slc4a7 PE=1 SV=1;tr|A0A286YDX4|A0A286YDX4_MOUSE Anio	19	1	1	1	0	0	0	1	0	0	0	1	0	0	0	1	20.5	20.5	20.5	9.4079	88	88;840;924;930;937;943;944;950;957;977;1047;1049;1053;1054;1060;1062;1068;1131;1034	0.0097765	1.5491				By MS/MS	NaN	NaN	NaN	1	1	Median	NaN	NaN	NaN	NaN	NaN	NaN	NaN	NaN
A0A286YDB7;A0A286YCT4;A0A286YCG8;Q9CY50	A0A286YDB7;A0A286YCT4;A0A286YCG8;Q9CY50	2;2;2;2	2;2;2;2	2;2;2;2	Translocon-associated protein subunit alpha	Ssr1	tr|A0A286YDB7|A0A286YDB7_MOUSE Translocon-associated protein subunit alpha (Fragment) OS=Mus musculus OX=10090 GN=Ssr1 PE=1 SV=1;tr|A0A286YCT4|A0A286YCT4_MOUSE Translocon-associated protein subunit alpha OS=Mus musculus OX=10090 GN=Ssr1 PE=1 SV=1;tr|A0A286	4	2	2	2	2	2	1	2	2	2	1	2	2	2	1	2	16.5	16.5	16.5	13.111	115	115;298;318;286	0	3.9236	By MS/MS	By MS/MS	By matching	By MS/MS	0.65651	0.92212	2.9921	7	1	Leave out requantified	0.7617	0.58861	NaN	0.71286	1.079	0.98216	NaN	0.88153
A0A286YD08;A0A286YDI8;G3X972	A0A286YD08;A0A286YDI8;G3X972	1;1;1	1;1;1	1;1;1		Sec24c	tr|A0A286YD08|A0A286YD08_MOUSE Sec24-related gene family, member C (S. cerevisiae) (Fragment) OS=Mus musculus OX=10090 GN=Sec24c PE=1 SV=1;tr|A0A286YDI8|A0A286YDI8_MOUSE Sec24-related gene family, member C (S. cerevisiae) OS=Mus musculus OX=10090 GN=Sec24c	3	1	1	1	1	1	1	1	1	1	1	1	1	1	1	1	9.2	9.2	9.2	19.382	174	174;1020;1096	0	3.6733	By MS/MS	By matching	By matching	By MS/MS	0.7978	1.1237	11.234	4	0	Median	NaN	NaN	NaN	NaN	NaN	NaN	NaN	NaN
A0A286YD12;Q91YP2;A0A286YD77	A0A286YD12;Q91YP2	3;3;1	3;3;1	3;3;1	Neurolysin, mitochondrial	Nln	tr|A0A286YD12|A0A286YD12_MOUSE Neurolysin, mitochondrial OS=Mus musculus OX=10090 GN=Nln PE=1 SV=1;sp|Q91YP2|NEUL_MOUSE Neurolysin, mitochondrial OS=Mus musculus OX=10090 GN=Nln PE=1 SV=1	3	3	3	3	2	3	2	2	2	3	2	2	2	3	2	2	5.9	5.9	5.9	77.893	683	683;704;151	0	11.558	By MS/MS	By MS/MS	By MS/MS	By MS/MS	0.21465	0.27437	121.17	9	5	Median	0.31382	0.17703	0.12311	0.38568	0.43113	0.21106	0.15484	0.48253
A0A286YD84;A0A286YDY4;A7YY80;Q9WV92;A0A286YCY1	A0A286YD84;A0A286YDY4;A7YY80;Q9WV92;A0A286YCY1	2;2;2;2;1	1;1;1;1;1	1;1;1;1;1	Band 4.1-like protein 3;Band 4.1-like protein 3, N-terminally processed	Epb4.1l3;Epb41l3	tr|A0A286YD84|A0A286YD84_MOUSE Band 4.1-like protein 3 (Fragment) OS=Mus musculus OX=10090 GN=Epb41l3 PE=1 SV=1;tr|A0A286YDY4|A0A286YDY4_MOUSE Band 4.1-like protein 3 (Fragment) OS=Mus musculus OX=10090 GN=Epb41l3 PE=1 SV=1;tr|A7YY80|A7YY80_MOUSE 130kDa Pr	5	2	1	1	1	2	2	0	0	1	1	0	0	1	1	0	2.6	1.5	1.5	67.253	605	605;852;876;929;262	0	3.1776	By matching	By MS/MS	By MS/MS		0.57634	0.89988	20.893	2	1	Median	NaN	NaN	NaN	NaN	NaN	NaN	NaN	NaN
A0A286YDA2;A0A286YDT3;E9Q5C9;A0A286YDV7;A0A286YCD1;A0A286YDZ1	A0A286YDA2;A0A286YDT3;E9Q5C9;A0A286YDV7	11;11;11;11;3;1	11;11;11;11;3;1	11;11;11;11;3;1		Nolc1	tr|A0A286YDA2|A0A286YDA2_MOUSE Nucleolar and coiled-body phosphoprotein 1 OS=Mus musculus OX=10090 GN=Nolc1 PE=1 SV=1;tr|A0A286YDT3|A0A286YDT3_MOUSE Nucleolar and coiled-body phosphoprotein 1 OS=Mus musculus OX=10090 GN=Nolc1 PE=1 SV=1;sp|E9Q5C9|NOLC1_MOUS	6	11	11	11	7	7	8	9	7	7	8	9	7	7	8	9	17.1	17.1	17.1	73.427	700	700;701;702;702;197;36	0	28.115	By MS/MS	By MS/MS	By MS/MS	By MS/MS	0.57763	0.84013	9.5152	28	12	Leave out requantified	0.53514	0.51929	0.60327	0.57935	0.77734	0.90138	0.87962	0.717
A0A286YDS5;Q99KF1	A0A286YDS5;Q99KF1	3;3	3;3	3;3	Transmembrane emp24 domain-containing protein 9	Tmed9	tr|A0A286YDS5|A0A286YDS5_MOUSE Transmembrane emp24 domain-containing protein 9 OS=Mus musculus OX=10090 GN=Tmed9 PE=1 SV=1;sp|Q99KF1|TMED9_MOUSE Transmembrane emp24 domain-containing protein 9 OS=Mus musculus OX=10090 GN=Tmed9 PE=1 SV=2	2	3	3	3	1	1	2	2	1	1	2	2	1	1	2	2	13.4	13.4	13.4	24.597	209	209;235	0	21.722	By matching	By MS/MS	By MS/MS	By MS/MS	0.21663	0.27421	157.46	6	3	Median	NaN	NaN	0.21663	0.22176	NaN	NaN	0.27421	0.27825
A0A286YDU0;E9PYG6	A0A286YDU0;E9PYG6	1;1	1;1	1;1		Rasa1	tr|A0A286YDU0|A0A286YDU0_MOUSE RAS p21 protein activator 1 (Fragment) OS=Mus musculus OX=10090 GN=Rasa1 PE=1 SV=1;tr|E9PYG6|E9PYG6_MOUSE RAS p21 protein activator 1 OS=Mus musculus OX=10090 GN=Rasa1 PE=1 SV=1	2	1	1	1	1	1	1	1	1	1	1	1	1	1	1	1	2.2	2.2	2.2	56.782	497	497;1038	0.0010735	2.5942	By MS/MS	By MS/MS	By MS/MS	By MS/MS	0.63904	0.85599	11.685	4	0	Median	NaN	NaN	NaN	NaN	NaN	NaN	NaN	NaN
P0DOY1;A0A286YDX7;O88508;G3UZH2;Q3KR45;O88509	P0DOY1;A0A286YDX7;O88508;G3UZH2;Q3KR45;O88509	2;2;2;1;1;1	2;2;2;1;1;1	2;2;2;1;1;1	DNA (cytosine-5)-methyltransferase 3A;DNA (cytosine-5)-methyltransferase 3B	Dnmt3a;Dnmt3b	sp|P0DOY1|DNM3C_MOUSE DNA (cytosine-5)-methyltransferase 3C OS=Mus musculus OX=10090 GN=Dnmt3c PE=1 SV=1;tr|A0A286YDX7|A0A286YDX7_MOUSE DNA (cytosine-5)-methyltransferase 3C OS=Mus musculus OX=10090 GN=Dnmt3c PE=3 SV=1;sp|O88508|DNM3A_MOUSE DNA (cytosine-5	6	2	2	2	1	0	1	1	1	0	1	1	1	0	1	1	2.1	2.1	2.1	79.375	709	709;740;908;72;860;859	0.0043902	1.8438	By MS/MS		By MS/MS	By MS/MS	0.20849	0.27821	58.465	2	2	Median	NaN	NaN	NaN	NaN	NaN	NaN	NaN	NaN
A0A2C9F2D2;Q07076;A0A286YCW4	A0A2C9F2D2;Q07076	9;9;1	9;9;1	9;9;1	Annexin A7	Anxa7	tr|A0A2C9F2D2|A0A2C9F2D2_MOUSE Annexin OS=Mus musculus OX=10090 GN=Anxa7 PE=1 SV=1;sp|Q07076|ANXA7_MOUSE Annexin A7 OS=Mus musculus OX=10090 GN=Anxa7 PE=1 SV=2	3	9	9	9	4	5	5	3	4	5	5	3	4	5	5	3	22.7	22.7	22.7	52.27	485	485;463;72	0	20.8	By MS/MS	By MS/MS	By MS/MS	By MS/MS	0.082896	0.098832	101.35	11	9	Median	0.15661	0.082896	0.092231	NaN	0.21698	0.098832	0.11753	NaN
A0A2I3BPG8;E9Q2H1;A0A2I3BQS6;Q80TP3	A0A2I3BPG8;E9Q2H1;A0A2I3BQS6;Q80TP3	1;1;1;1	1;1;1;1	1;1;1;1	E3 ubiquitin-protein ligase UBR5	Ubr5	tr|A0A2I3BPG8|A0A2I3BPG8_MOUSE E3 ubiquitin-protein ligase UBR5 (Fragment) OS=Mus musculus OX=10090 GN=Ubr5 PE=1 SV=1;tr|E9Q2H1|E9Q2H1_MOUSE E3 ubiquitin-protein ligase UBR5 OS=Mus musculus OX=10090 GN=Ubr5 PE=1 SV=2;tr|A0A2I3BQS6|A0A2I3BQS6_MOUSE E3 ubiqu	4	1	1	1	1	1	1	0	1	1	1	0	1	1	1	0	15.5	15.5	15.5	15.246	142	142;2792;2798;2792	0	4.0186	By MS/MS	By MS/MS	By MS/MS		0.03725	0.047102	11.317	3	3	Plateau	NaN	NaN	NaN	NaN	NaN	NaN	NaN	NaN
A0A2I3BQE3;A0A2I3BQY4;Q9JK38	A0A2I3BQE3;A0A2I3BQY4;Q9JK38	2;2;2	2;2;2	2;2;2	Glucosamine 6-phosphate N-acetyltransferase	Gnpnat1	tr|A0A2I3BQE3|A0A2I3BQE3_MOUSE Glucosamine 6-phosphate N-acetyltransferase (Fragment) OS=Mus musculus OX=10090 GN=Gnpnat1 PE=1 SV=1;tr|A0A2I3BQY4|A0A2I3BQY4_MOUSE Glucosamine 6-phosphate N-acetyltransferase OS=Mus musculus OX=10090 GN=Gnpnat1 PE=1 SV=1;sp|	3	2	2	2	1	1	2	1	1	1	2	1	1	1	2	1	16.3	16.3	16.3	15.347	135	135;206;184	0	6.2576	By MS/MS	By MS/MS	By MS/MS	By MS/MS	0.63245	0.9245	6.9943	4	0	Median	NaN	NaN	NaN	NaN	NaN	NaN	NaN	NaN
A0A2I3BQF4;P62889	A0A2I3BQF4;P62889	6;6	6;6	6;6	60S ribosomal protein L30	Rpl30	tr|A0A2I3BQF4|A0A2I3BQF4_MOUSE 60S ribosomal protein L30 OS=Mus musculus OX=10090 GN=Rpl30 PE=1 SV=1;sp|P62889|RL30_MOUSE 60S ribosomal protein L30 OS=Mus musculus OX=10090 GN=Rpl30 PE=1 SV=2	2	6	6	6	6	5	5	3	6	5	5	3	6	5	5	3	72.3	72.3	72.3	10.457	94	94;115	0	73.702	By MS/MS	By MS/MS	By MS/MS	By MS/MS	0.65975	0.96814	2.6579	33	11	Leave out requantified	0.65014	0.59784	0.69531	0.76136	0.92012	1.0136	1.0086	0.94983
Q91X76;A0A2I3BQR1;A0A2I3BRL0;A0A2I3BR81;A0A2I3BPH8	Q91X76;A0A2I3BQR1;A0A2I3BRL0;A0A2I3BR81	3;3;3;3;1	3;3;3;3;1	3;3;3;3;1		Nt5dc2	tr|Q91X76|Q91X76_MOUSE 5-nucleotidase domain-containing 2 OS=Mus musculus OX=10090 GN=Nt5dc2 PE=1 SV=1;tr|A0A2I3BQR1|A0A2I3BQR1_MOUSE 5-nucleotidase domain-containing 2 (Fragment) OS=Mus musculus OX=10090 GN=Nt5dc2 PE=1 SV=1;tr|A0A2I3BRL0|A0A2I3BRL0_MOUS	5	3	3	3	2	1	1	3	2	1	1	3	2	1	1	3	9.2	9.2	9.2	46.034	390	390;464;493;553;281	0	7.0758	By MS/MS	By matching	By matching	By MS/MS	0.68681	0.95579	98.669	7	3	Median	0.75639	NaN	NaN	0.78858	1.0531	NaN	NaN	0.95715
A0A2I3BR78;Q9CSH3	A0A2I3BR78;Q9CSH3	1;1	1;1	1;1	Exosome complex exonuclease RRP44	Dis3	tr|A0A2I3BR78|A0A2I3BR78_MOUSE Exosome complex exonuclease RRP44 OS=Mus musculus OX=10090 GN=Dis3 PE=1 SV=1;sp|Q9CSH3|RRP44_MOUSE Exosome complex exonuclease RRP44 OS=Mus musculus OX=10090 GN=Dis3 PE=1 SV=4	2	1	1	1	0	0	1	0	0	0	1	0	0	0	1	0	2.3	2.3	2.3	64.633	566	566;958	0.0010565	2.4448			By MS/MS		NaN	NaN	NaN	0	0	Median	NaN	NaN	NaN	NaN	NaN	NaN	NaN	NaN
A0A2I3BRL8;Q91VM5;S4R1F6;A0A2I3BQC0	A0A2I3BRL8;Q91VM5	11;11;4;2	11;11;4;2	3;3;0;0	RNA binding motif protein, X-linked-like-1	Rbmxl1	tr|A0A2I3BRL8|A0A2I3BRL8_MOUSE Predicted gene 7324 OS=Mus musculus OX=10090 GN=Gm7324 PE=4 SV=1;sp|Q91VM5|RMXL1_MOUSE RNA binding motif protein, X-linked-like-1 OS=Mus musculus OX=10090 GN=Rbmxl1 PE=2 SV=1	4	11	11	3	5	11	7	7	5	11	7	7	2	3	2	2	28.9	28.9	8	42.178	388	388;388;263;30	0	51.145	By MS/MS	By MS/MS	By MS/MS	By MS/MS	0.83227	1.2105	6.4919	29	8	Leave out requantified	0.78744	0.74689	0.84898	0.97369	1.1015	1.2438	1.2332	1.1934
A0A2K6EDK3;Q6PIP5	A0A2K6EDK3;Q6PIP5	2;2	2;2	2;2	NudC domain-containing protein 1	Nudcd1	tr|A0A2K6EDK3|A0A2K6EDK3_MOUSE NudC domain-containing protein 1 OS=Mus musculus OX=10090 GN=Nudcd1 PE=1 SV=1;sp|Q6PIP5|NUDC1_MOUSE NudC domain-containing protein 1 OS=Mus musculus OX=10090 GN=Nudcd1 PE=1 SV=2	2	2	2	2	2	1	1	1	2	1	1	1	2	1	1	1	4.1	4.1	4.1	66.605	581	581;582	0.0010689	2.5496	By MS/MS	By MS/MS	By MS/MS	By matching	0.60615	0.87334	102.82	5	1	Median	0.24421	NaN	NaN	NaN	0.30659	NaN	NaN	NaN
A0A2R8VHH1;Q99P88	A0A2R8VHH1;Q99P88	3;3	3;3	3;3	Nuclear pore complex protein Nup155	Nup155	tr|A0A2R8VHH1|A0A2R8VHH1_MOUSE Nuclear pore complex protein Nup155 OS=Mus musculus OX=10090 GN=Nup155 PE=1 SV=1;sp|Q99P88|NU155_MOUSE Nuclear pore complex protein Nup155 OS=Mus musculus OX=10090 GN=Nup155 PE=1 SV=1	2	3	3	3	1	0	1	3	1	0	1	3	1	0	1	3	3.1	3.1	3.1	150.14	1346	1346;1391	0	9.0913	By MS/MS		By MS/MS	By MS/MS	NaN	NaN	NaN	0	0	Median	NaN	NaN	NaN	NaN	NaN	NaN	NaN	NaN
A0A2R8VI25;B2M1R7;Q61990;A0A2R8VHP9;Q3TT81;A0A2R8VJY1;A0A2R8VHZ0;A0A2R8VHG2;A0A2R8W6L5;A0A2R8VHY9;A0A2R8VKN0;A0A2R8VI73;A0A2R8VI12;A0A2R8VHN3;A0A2R8VKF0;A0A2R8VHL8;A0A2R8VI71;A0A2R8W6U6;A0A2R8VI92;A0A2R8VI15;A0A2R8VHI3;A0A2R8W6H3	A0A2R8VI25;B2M1R7;Q61990;A0A2R8VHP9;Q3TT81;A0A2R8VJY1;A0A2R8VHZ0;A0A2R8VHG2;A0A2R8W6L5;A0A2R8VHY9;A0A2R8VKN0;A0A2R8VI73;A0A2R8VI12;A0A2R8VHN3;A0A2R8VKF0;A0A2R8VHL8;A0A2R8VI71;A0A2R8W6U6	12;12;12;11;10;9;9;8;8;8;8;8;8;7;7;7;7;6;5;4;3;3	6;6;6;6;5;4;4;3;3;3;4;4;4;3;3;4;3;3;3;2;1;2	6;6;6;6;5;4;4;3;3;3;4;4;4;3;3;4;3;3;3;2;1;2	Poly(rC)-binding protein 2	Pcbp2	tr|A0A2R8VI25|A0A2R8VI25_MOUSE Poly(RC) binding protein 2, isoform CRA_d OS=Mus musculus OX=10090 GN=Pcbp2 PE=1 SV=1;tr|B2M1R7|B2M1R7_MOUSE Poly(rC)-binding protein 2 OS=Mus musculus OX=10090 GN=Pcbp2 PE=1 SV=1;sp|Q61990|PCBP2_MOUSE Poly(rC)-binding protei	22	12	6	6	10	11	11	9	5	5	5	3	5	5	5	3	56.3	33.2	33.2	33.299	316	316;361;362;335;322;205;231;186;224;249;253;264;280;168;190;225;241;265;181;192;96;184	0	27.416	By MS/MS	By MS/MS	By MS/MS	By MS/MS	0.74316	1.0709	16.942	19	3	Leave out requantified	0.73586	0.639	0.72641	0.84565	1.032	1.0685	1.056	1.0511
A0A2R8VJU9;A0A2R8VI30;D3Z187;A0A2R8VI94;A0A2R8VK70;A0A2R8W6P0;Q61735	A0A2R8VJU9;A0A2R8VI30;D3Z187;A0A2R8VI94;A0A2R8VK70;A0A2R8W6P0;Q61735	2;2;2;2;2;2;2	2;2;2;2;2;2;2	2;2;2;2;2;2;2	Leukocyte surface antigen CD47	Cd47	tr|A0A2R8VJU9|A0A2R8VJU9_MOUSE Leukocyte surface antigen CD47 OS=Mus musculus OX=10090 GN=Cd47 PE=1 SV=1;tr|A0A2R8VI30|A0A2R8VI30_MOUSE Leukocyte surface antigen CD47 OS=Mus musculus OX=10090 GN=Cd47 PE=1 SV=1;tr|D3Z187|D3Z187_MOUSE Leukocyte surface antig	7	2	2	2	1	1	2	1	1	1	2	1	1	1	2	1	9.3	9.3	9.3	28.251	258	258;267;271;278;321;342;303	0	7.1446	By matching	By matching	By MS/MS	By MS/MS	0.80601	0.94002	8.1702	4	0	Linear	NaN	NaN	NaN	NaN	NaN	NaN	NaN	NaN
A0A2R8W6P6;A0A2R8VI39;P23591;A0A2R8VHD0;A0A2R8VKL9;A0A2R8W6N0	A0A2R8W6P6;A0A2R8VI39;P23591;A0A2R8VHD0	6;6;6;5;2;1	6;6;6;5;2;1	6;6;6;5;2;1	GDP-L-fucose synthase	Tsta3	tr|A0A2R8W6P6|A0A2R8W6P6_MOUSE GDP-L-fucose synthase OS=Mus musculus OX=10090 GN=Tsta3 PE=1 SV=1;tr|A0A2R8VI39|A0A2R8VI39_MOUSE GDP-L-fucose synthase OS=Mus musculus OX=10090 GN=Tsta3 PE=1 SV=1;sp|P23591|FCL_MOUSE GDP-L-fucose synthase OS=Mus musculus OX=1	6	6	6	6	2	2	3	4	2	2	3	4	2	2	3	4	23.9	23.9	23.9	36.071	327	327;351;321;292;128;62	0	20.515	By MS/MS	By MS/MS	By MS/MS	By MS/MS	0.498	0.66607	41.02	7	5	Median	NaN	0.53589	NaN	0.36587	NaN	0.88422	NaN	0.40347
A0A2R8VI72;Q8R0H9;A2A9W5;S4R2D2;A2A9W7;Q6P5E6;Q8BMI3	A0A2R8VI72;Q8R0H9;A2A9W5;S4R2D2;A2A9W7;Q6P5E6;Q8BMI3	2;2;1;1;1;1;1	2;2;1;1;1;1;1	2;2;1;1;1;1;1	ADP-ribosylation factor-binding protein GGA1;ADP-ribosylation factor-binding protein GGA2;ADP-ribosylation factor-binding protein GGA3	Gga1;Gga3;Gga2	tr|A0A2R8VI72|A0A2R8VI72_MOUSE ADP-ribosylation factor-binding protein GGA1 OS=Mus musculus OX=10090 GN=Gga1 PE=1 SV=1;sp|Q8R0H9|GGA1_MOUSE ADP-ribosylation factor-binding protein GGA1 OS=Mus musculus OX=10090 GN=Gga1 PE=1 SV=1;tr|A2A9W5|A2A9W5_MOUSE ADP-r	7	2	2	2	1	1	1	2	1	1	1	2	1	1	1	2	4.1	4.1	4.1	41.046	363	363;635;117;595;640;603;718	0.0025381	2.098	By MS/MS	By MS/MS	By MS/MS	By MS/MS	0.79093	0.9107	8.9804	4	0	Linear	NaN	NaN	NaN	NaN	NaN	NaN	NaN	NaN
A0A2R8VJY7;A0A2R8VJN7;A0A2R8W6T4;A0A2R8W6M8;Q8K1N4;A0A2R8VKR1	A0A2R8VJY7;A0A2R8VJN7;A0A2R8W6T4;A0A2R8W6M8;Q8K1N4	3;3;3;3;3;1	3;3;3;3;3;1	3;3;3;3;3;1	Spermatogenesis-associated serine-rich protein 2	Spats2	tr|A0A2R8VJY7|A0A2R8VJY7_MOUSE Spermatogenesis-associated serine-rich protein 2 (Fragment) OS=Mus musculus OX=10090 GN=Spats2 PE=1 SV=1;tr|A0A2R8VJN7|A0A2R8VJN7_MOUSE Spermatogenesis-associated serine-rich protein 2 (Fragment) OS=Mus musculus OX=10090 GN=S	6	3	3	3	2	1	0	1	2	1	0	1	2	1	0	1	28.8	28.8	28.8	17.298	160	160;160;200;255;545;40	0	5.5836	By MS/MS	By MS/MS		By matching	0.96457	1.1724	7.1205	3	0	Plateau	NaN	NaN	NaN	NaN	NaN	NaN	NaN	NaN
A0A2R8VJV3;Q8R3M1;P61924	A0A2R8VJV3;Q8R3M1;P61924	1;1;1	1;1;1	1;1;1	Coatomer subunit zeta-1	Copz1	tr|A0A2R8VJV3|A0A2R8VJV3_MOUSE Coatomer subunit zeta-1 OS=Mus musculus OX=10090 GN=Copz1 PE=1 SV=1;tr|Q8R3M1|Q8R3M1_MOUSE Coatomer subunit zeta-1 OS=Mus musculus OX=10090 GN=Copz1 PE=1 SV=1;sp|P61924|COPZ1_MOUSE Coatomer subunit zeta-1 OS=Mus musculus OX=1	3	1	1	1	1	1	1	1	1	1	1	1	1	1	1	1	16.7	16.7	16.7	9.5418	84	84;163;177	0	3.7499	By MS/MS	By MS/MS	By MS/MS	By MS/MS	0.74998	1.1268	16.413	4	0	Median	NaN	NaN	NaN	NaN	NaN	NaN	NaN	NaN
A0A2R8VK76;Q9EPU4	A0A2R8VK76;Q9EPU4	1;1	1;1	1;1	Cleavage and polyadenylation specificity factor subunit 1	Cpsf1	tr|A0A2R8VK76|A0A2R8VK76_MOUSE Cleavage and polyadenylation-specificity factor subunit 1 OS=Mus musculus OX=10090 GN=Cpsf1 PE=1 SV=1;sp|Q9EPU4|CPSF1_MOUSE Cleavage and polyadenylation specificity factor subunit 1 OS=Mus musculus OX=10090 GN=Cpsf1 PE=1 SV=1	2	1	1	1	0	0	1	0	0	0	1	0	0	0	1	0	0.7	0.7	0.7	161.77	1450	1450;1441	0	3.0408			By MS/MS		NaN	NaN	NaN	0	0	Median	NaN	NaN	NaN	NaN	NaN	NaN	NaN	NaN
A0A2R8W6Y5;A0A2R8VKL5;E9Q066;G3X9Q6;Q8BWW4	A0A2R8W6Y5;A0A2R8VKL5;E9Q066;G3X9Q6;Q8BWW4	3;3;3;3;3	3;3;3;3;3	3;3;3;3;3	La-related protein 4	Larp4	tr|A0A2R8W6Y5|A0A2R8W6Y5_MOUSE La-related protein 4 OS=Mus musculus OX=10090 GN=Larp4 PE=1 SV=1;tr|A0A2R8VKL5|A0A2R8VKL5_MOUSE La-related protein 4 OS=Mus musculus OX=10090 GN=Larp4 PE=1 SV=1;tr|E9Q066|E9Q066_MOUSE La-related protein 4 OS=Mus musculus OX=1	5	3	3	3	0	2	0	2	0	2	0	2	0	2	0	2	5.2	5.2	5.2	67.487	610	610;660;718;719;719	0	3.3088		By MS/MS		By MS/MS	0.20565	0.23431	233.43	2	2	Median	NaN	0.20565	NaN	NaN	NaN	0.23431	NaN	NaN
A0A2R8VKP3;Q61466;A0A2R8VHB7;A0A2R8VI28;A0A2R8VI06;A0A0G2JG60;Q6P9Z1;Q99JR8	A0A2R8VKP3;Q61466;A0A2R8VHB7;A0A2R8VI28;A0A2R8VI06;A0A0G2JG60;Q6P9Z1;Q99JR8	2;2;1;1;1;1;1;1	2;2;1;1;1;1;1;1	2;2;1;1;1;1;1;1	SWI/SNF-related matrix-associated actin-dependent regulator of chromatin subfamily D member 1;SWI/SNF-related matrix-associated actin-dependent regulator of chromatin subfamily D member 3;SWI/SNF-related matrix-associated actin-dependent regulator of chromatin subfamily D member 2	Smarcd1;Smarcd3;Smarcd2	tr|A0A2R8VKP3|A0A2R8VKP3_MOUSE SWI/SNF-related matrix-associated actin-dependent regulator of chromatin subfamily D member 1 OS=Mus musculus OX=10090 GN=Smarcd1 PE=1 SV=1;sp|Q61466|SMRD1_MOUSE SWI/SNF-related matrix-associated actin-dependent regulator of	8	2	2	2	0	1	0	1	0	1	0	1	0	1	0	1	6.1	6.1	6.1	53.585	474	474;515;95;98;175;454;483;531	0	4.523		By MS/MS		By MS/MS	NaN	NaN	NaN	1	1	Median	NaN	NaN	NaN	NaN	NaN	NaN	NaN	NaN
A0A2R8VKQ7;Q9D8T2	A0A2R8VKQ7;Q9D8T2	1;1	1;1	1;1	Gasdermin-D	Gsdmdc1	tr|A0A2R8VKQ7|A0A2R8VKQ7_MOUSE Gasdermin-D Gasdermin-D, N-terminal Gasdermin-D, C-terminal (Fragment) OS=Mus musculus OX=10090 GN=Gsdmd PE=1 SV=1;sp|Q9D8T2|GSDMD_MOUSE Gasdermin-D OS=Mus musculus OX=10090 GN=Gsdmdc1 PE=1 SV=1	2	1	1	1	0	1	1	0	0	1	1	0	0	1	1	0	4.9	4.9	4.9	29.211	263	263;487	0.0025407	2.1003		By MS/MS	By MS/MS		3.4987	4.0284	22.456	2	2	Median	NaN	NaN	NaN	NaN	NaN	NaN	NaN	NaN
A0A2R8W6R3;P62878	A0A2R8W6R3;P62878	1;1	1;1	1;1	E3 ubiquitin-protein ligase RBX1;E3 ubiquitin-protein ligase RBX1, N-terminally processed	Rbx1	tr|A0A2R8W6R3|A0A2R8W6R3_MOUSE E3 ubiquitin-protein ligase RBX1 OS=Mus musculus OX=10090 GN=Rbx1 PE=1 SV=1;sp|P62878|RBX1_MOUSE E3 ubiquitin-protein ligase RBX1 OS=Mus musculus OX=10090 GN=Rbx1 PE=1 SV=1	2	1	1	1	1	0	0	1	1	0	0	1	1	0	0	1	22.9	22.9	22.9	9.1173	83	83;108	0	6.9551	By matching			By MS/MS	0.62535	0.84624	11.498	2	0	Median	NaN	NaN	NaN	NaN	NaN	NaN	NaN	NaN
A0A2R8W6R6;G3X981;A0A2R8VKR9;CON__Q9H552	A0A2R8W6R6;G3X981	35;34;1;1	1;0;0;0	1;0;0;0		Prph	tr|A0A2R8W6R6|A0A2R8W6R6_MOUSE Peripherin OS=Mus musculus OX=10090 GN=Prph PE=1 SV=1;tr|G3X981|G3X981_MOUSE Peripherin OS=Mus musculus OX=10090 GN=Prph PE=1 SV=1	4	35	1	1	29	24	25	17	1	1	1	0	1	1	1	0	55.1	2	2	57.735	506	506;507;48;499	0.0015723	2.377	By MS/MS	By MS/MS	By matching	By matching	0.77316	1.3112	20.359	3	0	Median	NaN	NaN	NaN	NaN	NaN	NaN	NaN	NaN
A0JNY3;Q8BUV3	A0JNY3;Q8BUV3	1;1	1;1	1;1	Gephyrin;Molybdopterin adenylyltransferase;Molybdopterin molybdenumtransferase	Gphn	tr|A0JNY3|A0JNY3_MOUSE Gephyrin OS=Mus musculus OX=10090 GN=Gphn PE=1 SV=1;sp|Q8BUV3|GEPH_MOUSE Gephyrin OS=Mus musculus OX=10090 GN=Gphn PE=1 SV=2	2	1	1	1	0	1	1	0	0	1	1	0	0	1	1	0	1.6	1.6	1.6	83.665	772	772;769	0	3.446		By MS/MS	By MS/MS		0.92449	1.0645	40.553	2	2	Median	NaN	NaN	NaN	NaN	NaN	NaN	NaN	NaN
A1BN54;Q7TPR4	A1BN54;Q7TPR4	18;18	8;8	8;8	Alpha-actinin-1	Actn1	tr|A1BN54|A1BN54_MOUSE Alpha actinin 1a OS=Mus musculus OX=10090 GN=Actn1 PE=1 SV=1;sp|Q7TPR4|ACTN1_MOUSE Alpha-actinin-1 OS=Mus musculus OX=10090 GN=Actn1 PE=1 SV=1	2	18	8	8	10	9	13	7	6	3	5	4	6	3	5	4	23.8	11.3	11.3	102.72	887	887;892	0	19.557	By MS/MS	By MS/MS	By MS/MS	By MS/MS	0.72659	0.89965	34.041	12	5	Leave out requantified	0.13509	NaN	0.61398	0.90879	0.18818	NaN	0.70092	1.1134
A2A481;A2A480;A2A485;Q3UH28;Q3U1M7;A2A483;E9Q8D1;A2A482;A2A484	A2A481;A2A480;A2A485;Q3UH28;Q3U1M7;A2A483;E9Q8D1;A2A482;A2A484	1;1;1;1;1;1;1;1;1	1;1;1;1;1;1;1;1;1	1;1;1;1;1;1;1;1;1		Zmynd8	tr|A2A481|A2A481_MOUSE Zinc finger, MYND-type-containing 8 OS=Mus musculus OX=10090 GN=Zmynd8 PE=1 SV=1;tr|A2A480|A2A480_MOUSE Zinc finger, MYND-type-containing 8 (Fragment) OS=Mus musculus OX=10090 GN=Zmynd8 PE=1 SV=1;tr|A2A485|A2A485_MOUSE Zinc finger, M	9	1	1	1	0	0	0	1	0	0	0	1	0	0	0	1	2.1	2.1	2.1	53.594	472	472;492;1094;1154;1174;1179;1199;1206;1235	0	2.8505				By MS/MS	NaN	NaN	NaN	1	1	Median	NaN	NaN	NaN	NaN	NaN	NaN	NaN	NaN
A2A4K0;A2A4J8;Q9CQ80;E9PXS9;A8XY17	A2A4K0;A2A4J8;Q9CQ80;E9PXS9;A8XY17	2;2;2;1;1	2;2;2;1;1	2;2;2;1;1	Vacuolar protein-sorting-associated protein 25	Vps25	tr|A2A4K0|A2A4K0_MOUSE Vacuolar protein-sorting-associated protein 25 OS=Mus musculus OX=10090 GN=Vps25 PE=1 SV=1;tr|A2A4J8|A2A4J8_MOUSE Vacuolar protein-sorting-associated protein 25 OS=Mus musculus OX=10090 GN=Vps25 PE=1 SV=1;sp|Q9CQ80|VPS25_MOUSE Vacuol	5	2	2	2	0	0	2	0	0	0	2	0	0	0	2	0	12.8	12.8	12.8	20.474	172	172;184;176;91;128	0.0030272	2.0584			By MS/MS		0.27737	0.30843	160.03	2	2	Median	NaN	NaN	0.27737	NaN	NaN	NaN	0.30843	NaN
A2A547;P84099	A2A547;P84099	5;5	5;5	5;5	Ribosomal protein L19;60S ribosomal protein L19	Rpl19	tr|A2A547|A2A547_MOUSE Ribosomal protein L19 OS=Mus musculus OX=10090 GN=Rpl19 PE=1 SV=1;sp|P84099|RL19_MOUSE 60S ribosomal protein L19 OS=Mus musculus OX=10090 GN=Rpl19 PE=1 SV=1	2	5	5	5	4	5	4	3	4	5	4	3	4	5	4	3	26.8	26.8	26.8	23.247	194	194;196	0	27.3	By MS/MS	By MS/MS	By MS/MS	By MS/MS	0.69318	1.0622	2.4603	25	9	Leave out requantified	0.68562	0.61419	0.76353	0.80906	0.96385	1.0409	1.1052	0.98764
A2A6M1;Q9CZ28	A2A6M1;Q9CZ28	1;1	1;1	1;1	Vacuolar-sorting protein SNF8	Snf8	tr|A2A6M1|A2A6M1_MOUSE Vacuolar-sorting protein SNF8 OS=Mus musculus OX=10090 GN=Snf8 PE=1 SV=1;sp|Q9CZ28|SNF8_MOUSE Vacuolar-sorting protein SNF8 OS=Mus musculus OX=10090 GN=Snf8 PE=1 SV=1	2	1	1	1	1	0	1	0	1	0	1	0	1	0	1	0	5.2	5.2	5.2	25.968	233	233;258	0	4.492	By MS/MS		By MS/MS		0.17901	0.22279	58.458	2	2	Median	NaN	NaN	NaN	NaN	NaN	NaN	NaN	NaN
A2A6U3;Q80UG5;A2A6U5;A8Y5D3	A2A6U3;Q80UG5;A2A6U5	9;9;7;1	9;9;7;1	9;9;7;1	Septin-9	2022-09-09	tr|A2A6U3|A2A6U3_MOUSE Septin-9 OS=Mus musculus OX=10090 GN=Sept9 PE=1 SV=1;sp|Q80UG5|SEPT9_MOUSE Septin-9 OS=Mus musculus OX=10090 GN=Sept9 PE=1 SV=1;tr|A2A6U5|A2A6U5_MOUSE Septin-9 (Fragment) OS=Mus musculus OX=10090 GN=Sept9 PE=1 SV=1	4	9	9	9	6	6	6	5	6	6	6	5	6	6	6	5	14	14	14	63.772	565	565;583;242;74	0	19.188	By MS/MS	By MS/MS	By MS/MS	By MS/MS	0.62719	0.90168	8.753	17	7	Leave out requantified	0.63405	0.54641	0.62041	0.41488	0.89694	0.9318	0.90645	0.52163
A2A709;Q8VCA8	A2A709;Q8VCA8	1;1	1;1	1;1	Secernin-2	Scrn2	tr|A2A709|A2A709_MOUSE Secernin-2 (Fragment) OS=Mus musculus OX=10090 GN=Scrn2 PE=1 SV=1;sp|Q8VCA8|SCRN2_MOUSE Secernin-2 OS=Mus musculus OX=10090 GN=Scrn2 PE=1 SV=1	2	1	1	1	1	0	0	0	1	0	0	0	1	0	0	0	9.4	9.4	9.4	19.442	181	181;425	0	3.1119	By MS/MS				NaN	NaN	NaN	1	1	Median	NaN	NaN	NaN	NaN	NaN	NaN	NaN	NaN
A2A815;A2A817;A2A816	A2A815;A2A817;A2A816	9;5;5	1;0;0	1;0;0		Park7	tr|A2A815|A2A815_MOUSE Protein/nucleic acid deglycase DJ-1 (Fragment) OS=Mus musculus OX=10090 GN=Park7 PE=1 SV=8;tr|A2A817|A2A817_MOUSE Protein/nucleic acid deglycase DJ-1 (Fragment) OS=Mus musculus OX=10090 GN=Park7 PE=1 SV=1;tr|A2A816|A2A816_MOUSE Prote	3	9	1	1	9	7	7	7	1	0	0	0	1	0	0	0	80.7	9.6	9.6	14.243	135	135;84;125	1	-2	By MS/MS	By matching	By matching	By matching	NaN	NaN	NaN	1	1	Median	NaN	NaN	NaN	NaN	NaN	NaN	NaN	NaN
A2A8E2;Q8BHG2;A2A8E4;D6REH4;B7ZC72;B7ZC71	A2A8E2;Q8BHG2;A2A8E4;D6REH4;B7ZC72;B7ZC71	2;2;1;1;1;1	2;2;1;1;1;1	2;2;1;1;1;1	UPF0587 protein C1orf123 homolog	0610037L13Rik	tr|A2A8E2|A2A8E2_MOUSE RIKEN cDNA 0610037L13 gene OS=Mus musculus OX=10090 GN=0610037L13Rik PE=1 SV=1;sp|Q8BHG2|CA123_MOUSE UPF0587 protein C1orf123 homolog OS=Mus musculus OX=10090 PE=1 SV=1;tr|A2A8E4|A2A8E4_MOUSE RIKEN cDNA 0610037L13 gene (Fragment) OS=	6	2	2	2	1	2	1	1	1	2	1	1	1	2	1	1	23.9	23.9	23.9	15.783	138	138;160;66;110;153;155	0	3.1678	By MS/MS	By MS/MS	By MS/MS	By matching	0.95935	1.5311	93.024	5	2	Median	NaN	0.40787	NaN	NaN	NaN	0.54654	NaN	NaN
A2A8R7;B2RX14	A2A8R7;B2RX14	1;1	1;1	1;1	Terminal uridylyltransferase 4	Zcchc11	tr|A2A8R7|A2A8R7_MOUSE Terminal uridylyl transferase 4 OS=Mus musculus OX=10090 GN=Tut4 PE=1 SV=1;sp|B2RX14|TUT4_MOUSE Terminal uridylyltransferase 4 OS=Mus musculus OX=10090 GN=Tut4 PE=1 SV=2	2	1	1	1	0	1	1	0	0	1	1	0	0	1	1	0	0.7	0.7	0.7	185.12	1648	1648;1644	0.0043967	1.8582		By MS/MS	By MS/MS		NaN	NaN	NaN	0	0	Median	NaN	NaN	NaN	NaN	NaN	NaN	NaN	NaN
E9QKA4;A2A8V8;A2A8V9;E9PUK6;Q52KI8;A2A983;F6T4M4;F7BWM1	E9QKA4;A2A8V8;A2A8V9;E9PUK6;Q52KI8;A2A983	4;4;4;4;4;2;1;1	4;4;4;4;4;2;1;1	4;4;4;4;4;2;1;1	Serine/arginine repetitive matrix protein 1	Srrm1	tr|E9QKA4|E9QKA4_MOUSE Serine/arginine repetitive matrix protein 1 OS=Mus musculus OX=10090 GN=Srrm1 PE=1 SV=1;tr|A2A8V8|A2A8V8_MOUSE Serine/arginine repetitive matrix protein 1 OS=Mus musculus OX=10090 GN=Srrm1 PE=1 SV=1;tr|A2A8V9|A2A8V9_MOUSE Serine/argi	8	4	4	4	1	3	4	3	1	3	4	3	1	3	4	3	4.9	4.9	4.9	101.16	897	897;909;918;923;946;198;140;239	0	25.374	By MS/MS	By MS/MS	By MS/MS	By MS/MS	0.51911	0.74084	47.68	8	3	Leave out requantified	NaN	0.39883	0.62501	0.17457	NaN	0.49858	0.92682	0.21906
A2A9X5;Q9JM14	A2A9X5;Q9JM14	3;3	3;3	3;3	5(3)-deoxyribonucleotidase, cytosolic type	Nt5c	tr|A2A9X5|A2A9X5_MOUSE 5(3)-deoxyribonucleotidase, cytosolic type OS=Mus musculus OX=10090 GN=Nt5c PE=1 SV=1;sp|Q9JM14|NT5C_MOUSE 5(3)-deoxyribonucleotidase, cytosolic type OS=Mus musculus OX=10090 GN=Nt5c PE=1 SV=1	2	3	3	3	2	2	1	1	2	2	1	1	2	2	1	1	20.1	20.1	20.1	21.939	194	194;200	0	5.6295	By MS/MS	By MS/MS	By matching	By matching	0.46945	0.65769	91.551	5	1	Median	0.21245	NaN	NaN	NaN	0.2622	NaN	NaN	NaN
A2AAN2;Q8BMA6	A2AAN2;Q8BMA6	5;5	5;5	5;5	Signal recognition particle subunit SRP68	Srp68	tr|A2AAN2|A2AAN2_MOUSE Signal recognition particle subunit SRP68 OS=Mus musculus OX=10090 GN=Srp68 PE=1 SV=1;sp|Q8BMA6|SRP68_MOUSE Signal recognition particle subunit SRP68 OS=Mus musculus OX=10090 GN=Srp68 PE=1 SV=2	2	5	5	5	3	5	4	3	3	5	4	3	3	5	4	3	9.7	9.7	9.7	65.952	587	587;625	0	12.513	By MS/MS	By MS/MS	By MS/MS	By MS/MS	0.23585	0.33187	146.42	16	13	Median	0.31145	0.23515	0.20384	0.23785	0.43696	0.32963	0.25626	0.29658
A2ACG7;Q9DBG6	A2ACG7;Q9DBG6	8;8	8;8	8;8	Dolichyl-diphosphooligosaccharide--protein glycosyltransferase subunit 2	Rpn2	tr|A2ACG7|A2ACG7_MOUSE Dolichyl-diphosphooligosaccharide--protein glycosyltransferase subunit 2 OS=Mus musculus OX=10090 GN=Rpn2 PE=1 SV=1;sp|Q9DBG6|RPN2_MOUSE Dolichyl-diphosphooligosaccharide--protein glycosyltransferase subunit 2 OS=Mus musculus OX=1009	2	8	8	8	5	6	5	6	5	6	5	6	5	6	5	6	23.4	23.4	23.4	67.501	615	615;631	0	32	By MS/MS	By MS/MS	By MS/MS	By MS/MS	0.68201	0.96258	16.77	19	11	Leave out requantified	0.71178	0.54866	0.71839	0.8247	0.99599	0.93028	0.93878	1.0542
A2ACZ1;Q9D903	A2ACZ1;Q9D903	3;3	3;3	3;3	Probable rRNA-processing protein EBP2	Ebna1bp2	tr|A2ACZ1|A2ACZ1_MOUSE Probable rRNA-processing protein EBP2 (Fragment) OS=Mus musculus OX=10090 GN=Ebna1bp2 PE=1 SV=8;sp|Q9D903|EBP2_MOUSE Probable rRNA-processing protein EBP2 OS=Mus musculus OX=10090 GN=Ebna1bp2 PE=2 SV=1	2	3	3	3	2	3	2	2	2	3	2	2	2	3	2	2	15.6	15.6	15.6	21.611	186	186;306	0	6.441	By MS/MS	By MS/MS	By MS/MS	By MS/MS	0.7097	1.0812	109.67	9	5	Median	0.45395	0.7097	0.47229	0.40506	0.63716	1.2124	0.60296	0.50781
L7N278;A2ADW8;E9QA14;E9Q1L3;A2BI72;B1B0X6	L7N278;A2ADW8;E9QA14;E9Q1L3;A2BI72;B1B0X6	7;7;6;6;6;5	1;1;0;0;0;0	1;1;0;0;0;0		Luzp4;Gm15128;Gm15097;Gm15127;Gm15093;Gm15114	tr|L7N278|L7N278_MOUSE Leucine zipper protein 4 OS=Mus musculus OX=10090 GN=Luzp4 PE=4 SV=1;tr|A2ADW8|A2ADW8_MOUSE Uncharacterized protein OS=Mus musculus OX=10090 GN=Gm15128 PE=4 SV=1;tr|E9QA14|E9QA14_MOUSE Uncharacterized protein OS=Mus musculus OX=10090	6	7	1	1	3	4	5	2	1	0	0	0	1	0	0	0	15.6	1.8	1.8	52.922	449	449;449;449;449;449;433	0.0034774	1.9519	By MS/MS	By matching	By matching	By matching	NaN	NaN	NaN	0	0	Median	NaN	NaN	NaN	NaN	NaN	NaN	NaN	NaN
A2ADY9	A2ADY9	2	2	2	Protein DDI1 homolog 2	Ddi2	sp|A2ADY9|DDI2_MOUSE Protein DDI1 homolog 2 OS=Mus musculus OX=10090 GN=Ddi2 PE=1 SV=1	1	2	2	2	2	0	0	1	2	0	0	1	2	0	0	1	7.8	7.8	7.8	44.59	399	399	0	3.9507	By MS/MS			By MS/MS	0.53783	0.69653	6.6927	2	0	Median	NaN	NaN	NaN	NaN	NaN	NaN	NaN	NaN
A2AE27;Q9DBT5	A2AE27;Q9DBT5	3;3	3;3	3;3	AMP deaminase 2	Ampd2	tr|A2AE27|A2AE27_MOUSE AMP deaminase OS=Mus musculus OX=10090 GN=Ampd2 PE=1 SV=1;sp|Q9DBT5|AMPD2_MOUSE AMP deaminase 2 OS=Mus musculus OX=10090 GN=Ampd2 PE=1 SV=1	2	3	3	3	2	1	1	0	2	1	1	0	2	1	1	0	3	3	3	94.695	824	824;798	0	3.7965	By MS/MS	By MS/MS	By MS/MS		0.18581	0.25884	13.539	3	3	Median	0.16764	NaN	NaN	NaN	0.23354	NaN	NaN	NaN
A2AE89;P10649;F6WHQ7;F6Y363;A2AE91;Q8R5I6;D3YVP8;E9PV63;E9PVM7;P48774	A2AE89;P10649;F6WHQ7	5;5;3;2;2;2;1;1;1;1	5;5;3;2;2;2;1;1;1;1	1;1;0;0;0;0;0;0;0;0	Glutathione S-transferase Mu 1	Gstm1	tr|A2AE89|A2AE89_MOUSE Glutathione S-transferase Mu 1 OS=Mus musculus OX=10090 GN=Gstm1 PE=1 SV=2;sp|P10649|GSTM1_MOUSE Glutathione S-transferase Mu 1 OS=Mus musculus OX=10090 GN=Gstm1 PE=1 SV=2;tr|F6WHQ7|F6WHQ7_MOUSE Glutathione S-transferase Mu 1 (Fragme	10	5	5	1	4	3	4	2	4	3	4	2	0	1	0	0	22.5	22.5	2.9	28.556	244	244;218;194;85;184;218;123;158;215;224	0	15.322	By MS/MS	By MS/MS	By MS/MS	By MS/MS	0.65493	1.8828	63.255	13	9	Linear	0.62845	1.4955	0.6183	0.72772	0.81674	2.0826	0.88626	0.85196
F7BHW1;A2AEE7	F7BHW1;A2AEE7	1;1	1;1	1;1		Celsr2	tr|F7BHW1|F7BHW1_MOUSE Cadherin EGF LAG seven-pass G-type receptor 2 (Fragment) OS=Mus musculus OX=10090 GN=Celsr2 PE=1 SV=1;tr|A2AEE7|A2AEE7_MOUSE Cadherin EGF LAG seven-pass G-type receptor 2 OS=Mus musculus OX=10090 GN=Celsr2 PE=1 SV=1	2	1	1	1	1	1	0	0	1	1	0	0	1	1	0	0	1.2	1.2	1.2	98.332	900	900;2919	0.0030105	2.0237	By MS/MS	By MS/MS			NaN	NaN	NaN	0	0	Median	NaN	NaN	NaN	NaN	NaN	NaN	NaN	NaN
A2AEK1;Q8BIQ5;A2AEJ8;F6ZKC7;A2AEK3;Q8C7E9	A2AEK1;Q8BIQ5	5;5;2;2;1;1	5;5;2;2;1;1	5;5;2;2;1;1	Cleavage stimulation factor subunit 2	Cstf2	tr|A2AEK1|A2AEK1_MOUSE AlphaCstF-64 variant 4 OS=Mus musculus OX=10090 GN=Cstf2 PE=1 SV=1;sp|Q8BIQ5|CSTF2_MOUSE Cleavage stimulation factor subunit 2 OS=Mus musculus OX=10090 GN=Cstf2 PE=1 SV=2	6	5	5	5	3	4	4	3	3	4	4	3	3	4	4	3	11.7	11.7	11.7	58.571	554	554;580;184;259;191;632	0	16.035	By MS/MS	By MS/MS	By MS/MS	By MS/MS	0.88833	1.2922	21.767	12	4	Leave out requantified	0.75548	0.87557	0.7979	0.94198	1.0723	1.0685	1.1462	1.1447
A2AF81;F6S1R2;Q8N9S3	A2AF81;F6S1R2;Q8N9S3	1;1;1	1;1;1	1;1;1	Activator of 90 kDa heat shock protein ATPase homolog 2	Ahsa2	tr|A2AF81|A2AF81_MOUSE Activator of 90 kDa heat shock protein ATPase homolog 2 (Fragment) OS=Mus musculus OX=10090 GN=Ahsa2 PE=1 SV=1;tr|F6S1R2|F6S1R2_MOUSE Activator of 90 kDa heat shock protein ATPase homolog 2 (Fragment) OS=Mus musculus OX=10090 GN=Ahsa	3	1	1	1	0	0	1	0	0	0	1	0	0	0	1	0	5.5	5.5	5.5	22.402	200	200;317;331	0	3.1185			By MS/MS		NaN	NaN	NaN	1	1	Median	NaN	NaN	NaN	NaN	NaN	NaN	NaN	NaN
A2AFG7;A2AFG8;Q6PGJ3;P11627	A2AFG7;A2AFG8;Q6PGJ3;P11627	1;1;1;1	1;1;1;1	1;1;1;1	Neural cell adhesion molecule L1	L1cam	tr|A2AFG7|A2AFG7_MOUSE Neural cell adhesion molecule L1 OS=Mus musculus OX=10090 GN=L1cam PE=1 SV=1;tr|A2AFG8|A2AFG8_MOUSE Neural cell adhesion molecule L1 OS=Mus musculus OX=10090 GN=L1cam PE=1 SV=1;tr|Q6PGJ3|Q6PGJ3_MOUSE L1 cell adhesion molecule OS=Mus	4	1	1	1	1	0	0	0	1	0	0	0	1	0	0	0	0.8	0.8	0.8	139.82	1250	1250;1255;1259;1260	0	2.8379	By MS/MS				NaN	NaN	NaN	0	0	Median	NaN	NaN	NaN	NaN	NaN	NaN	NaN	NaN
A2AFI6	A2AFI6	5	5	5		Gm364	tr|A2AFI6|A2AFI6_MOUSE Transmembrane 9 superfamily member OS=Mus musculus OX=10090 GN=Gm364 PE=1 SV=1	1	5	5	5	3	4	5	4	3	4	5	4	3	4	5	4	8.9	8.9	8.9	77.299	671	671	0	19.477	By MS/MS	By MS/MS	By MS/MS	By MS/MS	0.93091	1.3669	18.399	19	0	Leave out requantified	0.97868	0.80305	1.0598	1.069	1.3504	1.3625	1.5358	1.3172
A2AFJ1;Q60973;A2AFI9;F6ZLC6;F6U539	A2AFJ1;Q60973;A2AFI9;F6ZLC6	8;8;7;4;2	8;8;7;4;2	3;3;2;1;1	Histone-binding protein RBBP7	Rbbp7	tr|A2AFJ1|A2AFJ1_MOUSE Histone-binding protein RBBP7 OS=Mus musculus OX=10090 GN=Rbbp7 PE=1 SV=1;sp|Q60973|RBBP7_MOUSE Histone-binding protein RBBP7 OS=Mus musculus OX=10090 GN=Rbbp7 PE=1 SV=1;tr|A2AFI9|A2AFI9_MOUSE Histone-binding protein RBBP7 OS=Mus mus	5	8	8	3	6	8	7	6	6	8	7	6	3	3	2	3	22.6	22.6	11.8	46.908	416	416;425;386;235;76	0	34.168	By MS/MS	By MS/MS	By MS/MS	By MS/MS	0.88283	1.2816	14.517	26	8	Leave out requantified	0.98347	0.71877	0.88857	1.0203	1.3755	1.2315	1.2975	1.2672
A2AFP5;Q9R0M6;A2AFP4	A2AFP5;Q9R0M6;A2AFP4	3;3;2	3;3;2	3;3;2	Ras-related protein Rab-9A	Rab9;Rab9a	tr|A2AFP5|A2AFP5_MOUSE RAB9, member RAS oncogene family (Fragment) OS=Mus musculus OX=10090 GN=Rab9 PE=1 SV=1;sp|Q9R0M6|RAB9A_MOUSE Ras-related protein Rab-9A OS=Mus musculus OX=10090 GN=Rab9a PE=1 SV=1;tr|A2AFP4|A2AFP4_MOUSE RAB9, member RAS oncogene fami	3	3	3	3	3	2	2	3	3	2	2	3	3	2	2	3	20.8	20.8	20.8	22.946	202	202;201;59	0	11.377	By MS/MS	By MS/MS	By MS/MS	By MS/MS	1.1569	1.8139	26.449	11	6	Leave out requantified	1.2099	1.072	1.0831	1.215	1.6491	1.8338	1.5454	1.472
A2AFQ0;Q7TMY8;F6XP90	A2AFQ0;Q7TMY8	27;27;6	27;27;6	27;27;6	E3 ubiquitin-protein ligase HUWE1	Huwe1	tr|A2AFQ0|A2AFQ0_MOUSE E3 ubiquitin-protein ligase HUWE1 OS=Mus musculus OX=10090 GN=Huwe1 PE=1 SV=1;sp|Q7TMY8|HUWE1_MOUSE E3 ubiquitin-protein ligase HUWE1 OS=Mus musculus OX=10090 GN=Huwe1 PE=1 SV=5	3	27	27	27	12	13	14	10	12	13	14	10	12	13	14	10	8.5	8.5	8.5	482.69	4378	4378;4377;1176	0	76.097	By MS/MS	By MS/MS	By MS/MS	By MS/MS	0.7242	1.0966	13.111	29	23	Leave out requantified	0.43684	0.55859	0.7242	0.25125	0.60854	0.99948	1.0538	0.32116
A2AFQ9;E9PUU4;Q8BX17;F7CKD6	A2AFQ9;E9PUU4;Q8BX17	5;5;5;1	5;5;5;1	5;5;5;1	Gem-associated protein 5	Gemin5	tr|A2AFQ9|A2AFQ9_MOUSE Gem-associated protein 5 OS=Mus musculus OX=10090 GN=Gemin5 PE=1 SV=1;tr|E9PUU4|E9PUU4_MOUSE Gem-associated protein 5 OS=Mus musculus OX=10090 GN=Gemin5 PE=1 SV=1;sp|Q8BX17|GEMI5_MOUSE Gem-associated protein 5 OS=Mus musculus OX=1009	4	5	5	5	3	2	3	1	3	2	3	1	3	2	3	1	3.6	3.6	3.6	166.52	1501	1501;1503;1502;177	0	11.265	By MS/MS	By MS/MS	By MS/MS	By MS/MS	0.41838	0.66471	44.485	5	0	Leave out requantified	NaN	0.37394	NaN	NaN	NaN	0.63197	NaN	NaN
A2AFW6;Q9D050;Q791V5	A2AFW6;Q9D050;Q791V5	3;3;3	3;3;3	3;3;3	Mitochondrial carrier homolog 2	Mtch2	tr|A2AFW6|A2AFW6_MOUSE Mitochondrial carrier homolog 2 OS=Mus musculus OX=10090 GN=Mtch2 PE=1 SV=1;tr|Q9D050|Q9D050_MOUSE Mitochondrial carrier homolog 2 OS=Mus musculus OX=10090 GN=Mtch2 PE=1 SV=1;sp|Q791V5|MTCH2_MOUSE Mitochondrial carrier homolog 2 OS=M	3	3	3	3	3	3	1	1	3	3	1	1	3	3	1	1	12.9	12.9	12.9	32.345	294	294;312;303	0	5.7201	By MS/MS	By MS/MS	By MS/MS	By MS/MS	0.089458	0.10689	34.661	8	8	Median	0.12763	0.080737	NaN	NaN	0.17779	0.096257	NaN	NaN
A2AH25;Q5FWK3	A2AH25;Q5FWK3	3;3	3;3	3;3	Rho GTPase-activating protein 1	Arhgap1	tr|A2AH25|A2AH25_MOUSE Rho GTPase-activating protein 1 OS=Mus musculus OX=10090 GN=Arhgap1 PE=1 SV=1;sp|Q5FWK3|RHG01_MOUSE Rho GTPase-activating protein 1 OS=Mus musculus OX=10090 GN=Arhgap1 PE=1 SV=1	2	3	3	3	2	1	2	2	2	1	2	2	2	1	2	2	6.9	6.9	6.9	54.437	479	479;439	0	5.9489	By MS/MS	By MS/MS	By MS/MS	By MS/MS	0.34491	0.41121	208.77	2	2	Median	NaN	NaN	NaN	NaN	NaN	NaN	NaN	NaN
G3UZ34;A2AH85;O08810;G3UXK8	G3UZ34;A2AH85;O08810	11;11;11;2	10;10;10;1	10;10;10;1	116 kDa U5 small nuclear ribonucleoprotein component	Eftud2	tr|G3UZ34|G3UZ34_MOUSE 116 kDa U5 small nuclear ribonucleoprotein component OS=Mus musculus OX=10090 GN=Eftud2 PE=1 SV=1;tr|A2AH85|A2AH85_MOUSE 116 kDa U5 small nuclear ribonucleoprotein component OS=Mus musculus OX=10090 GN=Eftud2 PE=1 SV=1;sp|O08810|U5S1	4	11	10	10	8	9	8	10	7	8	7	9	7	8	7	9	13.7	12.7	12.7	108.34	962	962;972;971;85	0	24.503	By MS/MS	By MS/MS	By MS/MS	By MS/MS	0.7568	1.014	5.7766	24	14	Leave out requantified	0.74209	0.53027	0.68586	0.92353	1.0362	0.90143	0.9923	1.1395
A2AI57;Q923J1	A2AI57;Q923J1	1;1	1;1	1;1	Transient receptor potential cation channel subfamily M member 7	Trpm7	tr|A2AI57|A2AI57_MOUSE Transient receptor potential cation channel subfamily M member 7 OS=Mus musculus OX=10090 GN=Trpm7 PE=1 SV=1;sp|Q923J1|TRPM7_MOUSE Transient receptor potential cation channel subfamily M member 7 OS=Mus musculus OX=10090 GN=Trpm7 PE=	2	1	1	1	1	0	1	1	1	0	1	1	1	0	1	1	0.4	0.4	0.4	212.33	1862	1862;1863	0.0057859	1.7527	By MS/MS		By MS/MS	By MS/MS	0.19952	0.22002	47.094	3	3	Median	NaN	NaN	NaN	NaN	NaN	NaN	NaN	NaN
A2AIW9;Q9DC61	A2AIW9;Q9DC61	2;2	2;2	2;2	Mitochondrial-processing peptidase subunit alpha	Pmpca	tr|A2AIW9|A2AIW9_MOUSE Mitochondrial-processing peptidase subunit alpha OS=Mus musculus OX=10090 GN=Pmpca PE=1 SV=1;sp|Q9DC61|MPPA_MOUSE Mitochondrial-processing peptidase subunit alpha OS=Mus musculus OX=10090 GN=Pmpca PE=1 SV=1	2	2	2	2	0	2	1	0	0	2	1	0	0	2	1	0	5.2	5.2	5.2	48.455	441	441;524	0	3.5747		By MS/MS	By MS/MS		NaN	NaN	NaN	0	0	Median	NaN	NaN	NaN	NaN	NaN	NaN	NaN	NaN
E9QAT4;A2AIX1	E9QAT4;A2AIX1	1;1	1;1	1;1		Sec16a	tr|E9QAT4|E9QAT4_MOUSE Protein transport protein sec16 OS=Mus musculus OX=10090 GN=Sec16a PE=1 SV=1;tr|A2AIX1|A2AIX1_MOUSE Protein transport protein sec16 OS=Mus musculus OX=10090 GN=Sec16a PE=1 SV=1	2	1	1	1	1	0	1	1	1	0	1	1	1	0	1	1	0.6	0.6	0.6	254.2	2357	2357;2377	0.00054466	2.7073	By MS/MS		By MS/MS	By MS/MS	0.43045	0.55022	44.189	3	3	Plateau	NaN	NaN	NaN	NaN	NaN	NaN	NaN	NaN
A2AJ72;Q3TIX6;A0A0A6YVV5;A2AJ71;A0A0A6YY39;A0A0A6YX76;F7AM43	A2AJ72;Q3TIX6;A0A0A6YVV5	9;9;5;3;3;2;2	7;7;4;3;2;2;2	7;7;4;3;2;2;2		Fubp3	tr|A2AJ72|A2AJ72_MOUSE Far upstream element (FUSE)-binding protein 3 OS=Mus musculus OX=10090 GN=Fubp3 PE=1 SV=1;tr|Q3TIX6|Q3TIX6_MOUSE Far upstream element (FUSE)-binding protein 3 OS=Mus musculus OX=10090 GN=Fubp3 PE=1 SV=1;tr|A0A0A6YVV5|A0A0A6YVV5_MOUSE	7	9	7	7	3	5	6	2	3	5	5	1	3	5	5	1	18.8	16.2	16.2	61.447	569	569;575;191;97;123;83;264	0	21.183	By MS/MS	By MS/MS	By MS/MS	By MS/MS	0.62204	0.77007	255.44	7	4	Median	0.62204	0.11504	0.124	NaN	0.77007	0.16482	0.15695	NaN
A2AJH3;O70311	A2AJH3;O70311	2;2	1;1	1;1	Glycylpeptide N-tetradecanoyltransferase;Glycylpeptide N-tetradecanoyltransferase 2	Nmt2	tr|A2AJH3|A2AJH3_MOUSE Glycylpeptide N-tetradecanoyltransferase OS=Mus musculus OX=10090 GN=Nmt2 PE=1 SV=1;sp|O70311|NMT2_MOUSE Glycylpeptide N-tetradecanoyltransferase 2 OS=Mus musculus OX=10090 GN=Nmt2 PE=1 SV=1	2	2	1	1	0	2	1	0	0	1	0	0	0	1	0	0	5	2.2	2.2	56.984	498	498;529	0.0010627	2.5077		By MS/MS	By matching		NaN	NaN	NaN	1	1	Median	NaN	NaN	NaN	NaN	NaN	NaN	NaN	NaN
A2AKA9;Q8K2F0;B0V2V8;Q3UH70;Q9ESU6	A2AKA9;Q8K2F0;B0V2V8;Q3UH70;Q9ESU6	2;2;1;1;1	2;2;1;1;1	2;2;1;1;1	Bromodomain-containing protein 3;Bromodomain-containing protein 4	Brd3;Brd4	tr|A2AKA9|A2AKA9_MOUSE Bromodomain-containing protein 3 (Fragment) OS=Mus musculus OX=10090 GN=Brd3 PE=1 SV=1;sp|Q8K2F0|BRD3_MOUSE Bromodomain-containing protein 3 OS=Mus musculus OX=10090 GN=Brd3 PE=1 SV=2;tr|B0V2V8|B0V2V8_MOUSE Bromodomain-containing pro	5	2	2	2	0	1	1	1	0	1	1	1	0	1	1	1	5.1	5.1	5.1	75.349	682	682;726;745;1401;1400	0.001065	2.5168		By MS/MS	By MS/MS	By MS/MS	0.22181	0.30892	14.916	3	0	Plateau	NaN	NaN	0.22181	NaN	NaN	NaN	0.30892	NaN
Q8C2Q8;A2AKU9;Q91VR2;A2AKV1;A2AKV2;A2AKV3;A2AKV0	Q8C2Q8;A2AKU9;Q91VR2;A2AKV1;A2AKV2;A2AKV3	7;7;7;5;5;5;2	7;7;7;5;5;5;2	7;7;7;5;5;5;2	ATP synthase subunit gamma;ATP synthase subunit gamma, mitochondrial	Atp5c1	tr|Q8C2Q8|Q8C2Q8_MOUSE ATP synthase subunit gamma OS=Mus musculus OX=10090 GN=Atp5c1 PE=1 SV=1;tr|A2AKU9|A2AKU9_MOUSE ATP synthase subunit gamma OS=Mus musculus OX=10090 GN=Atp5c1 PE=1 SV=1;sp|Q91VR2|ATPG_MOUSE ATP synthase subunit gamma, mitochondrial OS=	7	7	7	7	7	5	6	5	7	5	6	5	7	5	6	5	25.9	25.9	25.9	30.255	274	274;297;298;154;171;188;101	0	34.693	By MS/MS	By MS/MS	By MS/MS	By MS/MS	0.69185	0.99011	7.4916	29	9	Leave out requantified	0.71443	0.56598	0.68746	0.8755	1.0046	0.96	1.0002	1.0987
A2AL49;H3BKN2;A2AL50;Q8C0I1;H3BIY5	A2AL49;H3BKN2;A2AL50;Q8C0I1	4;4;4;4;1	4;4;4;4;1	4;4;4;4;1	Alkyldihydroxyacetonephosphate synthase, peroxisomal	Agps	tr|A2AL49|A2AL49_MOUSE Alkylglycerone-phosphate synthase OS=Mus musculus OX=10090 GN=Agps PE=1 SV=1;tr|H3BKN2|H3BKN2_MOUSE Alkylglycerone-phosphate synthase OS=Mus musculus OX=10090 GN=Agps PE=1 SV=1;tr|A2AL50|A2AL50_MOUSE Alkylglycerone-phosphate synthase	5	4	4	4	1	3	3	1	1	3	3	1	1	3	3	1	12.4	12.4	12.4	55.911	508	508;568;671;645;57	0	10.56	By MS/MS	By MS/MS	By MS/MS	By MS/MS	0.68095	0.94681	141.05	5	5	Median	NaN	0.25571	0.80755	NaN	NaN	0.30579	1.0041	NaN
Q8CBM2;A2AL85;Q8BSY0	Q8CBM2;A2AL85;Q8BSY0	1;1;1	1;1;1	1;1;1	Aspartyl/asparaginyl beta-hydroxylase	Asph	tr|Q8CBM2|Q8CBM2_MOUSE Aspartyl/asparaginyl beta-hydroxylase OS=Mus musculus OX=10090 GN=Asph PE=1 SV=1;tr|A2AL85|A2AL85_MOUSE Aspartyl/asparaginyl beta-hydroxylase OS=Mus musculus OX=10090 GN=Asph PE=1 SV=1;sp|Q8BSY0|ASPH_MOUSE Aspartyl/asparaginyl beta-h	3	1	1	1	1	1	1	1	1	1	1	1	1	1	1	1	1.8	1.8	1.8	75.127	658	658;725;741	0	3.0702	By MS/MS	By MS/MS	By matching	By MS/MS	0.56264	0.79304	8.8685	4	0	Median	NaN	NaN	NaN	NaN	NaN	NaN	NaN	NaN
A2ALA0;P70279	A2ALA0;P70279	1;1	1;1	1;1	Surfeit locus protein 6	Surf6	tr|A2ALA0|A2ALA0_MOUSE Surfeit locus protein 6 OS=Mus musculus OX=10090 GN=Surf6 PE=1 SV=1;sp|P70279|SURF6_MOUSE Surfeit locus protein 6 OS=Mus musculus OX=10090 GN=Surf6 PE=1 SV=1	2	1	1	1	1	0	1	1	1	0	1	1	1	0	1	1	4.8	4.8	4.8	23.514	208	208;355	0	3.0906	By MS/MS		By MS/MS	By MS/MS	0.040659	0.045212	39.58	3	3	Median	NaN	NaN	NaN	NaN	NaN	NaN	NaN	NaN
A2ALF0;F6TQL3;Q6NZB0;A2ALF3;F6QIL6	A2ALF0;F6TQL3;Q6NZB0;A2ALF3	3;3;3;2;1	3;3;3;2;1	3;3;3;2;1	DnaJ homolog subfamily C member 8	Dnajc8	tr|A2ALF0|A2ALF0_MOUSE DnaJ homolog subfamily C member 8 OS=Mus musculus OX=10090 GN=Dnajc8 PE=1 SV=1;tr|F6TQL3|F6TQL3_MOUSE DnaJ homolog subfamily C member 8 (Fragment) OS=Mus musculus OX=10090 GN=Dnajc8 PE=1 SV=1;sp|Q6NZB0|DNJC8_MOUSE DnaJ homolog subfam	5	3	3	3	2	2	1	2	2	2	1	2	2	2	1	2	11.9	11.9	11.9	25.835	219	219;244;253;234;84	0	5.2029	By MS/MS	By MS/MS	By MS/MS	By MS/MS	0.62228	1.019	13.995	10	2	Leave out requantified	0.66756	0.62228	NaN	0.72191	0.92303	1.0673	NaN	0.888
A2AM69;A2AM70;Z4YKB8;Q3TEA8	A2AM69;A2AM70;Z4YKB8;Q3TEA8	2;2;2;2	2;2;2;2	2;2;2;2	Heterochromatin protein 1-binding protein 3	Hp1bp3	tr|A2AM69|A2AM69_MOUSE Heterochromatin protein 1-binding protein 3 (Fragment) OS=Mus musculus OX=10090 GN=Hp1bp3 PE=1 SV=8;tr|A2AM70|A2AM70_MOUSE Heterochromatin protein 1-binding protein 3 (Fragment) OS=Mus musculus OX=10090 GN=Hp1bp3 PE=1 SV=1;tr|Z4YKB8|	4	2	2	2	1	1	1	1	1	1	1	1	1	1	1	1	29.4	29.4	29.4	9.2551	85	85;150;554;554	0.0010678	2.5388	By MS/MS	By MS/MS	By matching	By MS/MS	0.84142	1.1015	40.942	4	1	Median	NaN	NaN	NaN	NaN	NaN	NaN	NaN	NaN
A2AMW0;F7CAZ6	A2AMW0	8;3	8;3	2;0		Capzb	tr|A2AMW0|A2AMW0_MOUSE Capping protein (Actin filament) muscle Z-line, beta, isoform CRA_a OS=Mus musculus OX=10090 GN=Capzb PE=1 SV=1	2	8	8	2	6	6	7	5	6	6	7	5	2	2	2	1	30.8	30.8	6.2	29.295	260	260;204	0	23.199	By MS/MS	By MS/MS	By MS/MS	By MS/MS	0.71106	1.0156	4.6407	22	10	Leave out requantified	0.71456	0.56096	0.67521	0.85826	1.0072	0.93666	0.99044	1.0624
A2AMW3	A2AMW3	1	1	1		Gabre	tr|A2AMW3|A2AMW3_MOUSE Gamma-aminobutyric acid (GABA) A receptor, subunit epsilon OS=Mus musculus OX=10090 GN=Gabre PE=3 SV=1	1	1	1	1	0	1	0	1	0	1	0	1	0	1	0	1	1.1	1.1	1.1	104.51	916	916	0.0030151	2.0327		By MS/MS		By MS/MS	0.63541	0.91625	14.741	2	0	Median	NaN	NaN	NaN	NaN	NaN	NaN	NaN	NaN
A2AMY5;Q91VX2;A2AMY7	A2AMY5;Q91VX2	4;4;1	4;4;1	4;4;1	Ubiquitin-associated protein 2	Ubap2	tr|A2AMY5|A2AMY5_MOUSE Ubiquitin-associated protein 2 OS=Mus musculus OX=10090 GN=Ubap2 PE=1 SV=1;sp|Q91VX2|UBAP2_MOUSE Ubiquitin-associated protein 2 OS=Mus musculus OX=10090 GN=Ubap2 PE=1 SV=1	3	4	4	4	3	3	3	2	3	3	3	2	3	3	3	2	5.7	5.7	5.7	117.83	1131	1131;1132;227	0	14.113	By MS/MS	By MS/MS	By MS/MS	By MS/MS	0.64228	1.0225	126.44	9	8	Median	0.77996	NaN	0.3653	1.5367	1.0865	NaN	0.46239	1.9643
A2AN08;F6SSP6	A2AN08;F6SSP6	4;2	4;2	4;2	E3 ubiquitin-protein ligase UBR4	Ubr4	sp|A2AN08|UBR4_MOUSE E3 ubiquitin-protein ligase UBR4 OS=Mus musculus OX=10090 GN=Ubr4 PE=1 SV=1;tr|F6SSP6|F6SSP6_MOUSE E3 ubiquitin-protein ligase UBR4 (Fragment) OS=Mus musculus OX=10090 GN=Ubr4 PE=1 SV=1	2	4	4	4	2	3	3	4	2	3	3	4	2	3	3	4	1.1	1.1	1.1	572.28	5180	5180;2065	0	6.7339	By MS/MS	By MS/MS	By MS/MS	By MS/MS	0.61086	0.96243	7.0751	8	1	Leave out requantified	NaN	0.56213	0.53188	0.85229	NaN	0.9516	0.75503	1.0446
J3QMC5;A2ANY6	J3QMC5;A2ANY6	3;3	3;3	3;3		Mdn1	tr|J3QMC5|J3QMC5_MOUSE Midasin OS=Mus musculus OX=10090 GN=Mdn1 PE=1 SV=1;tr|A2ANY6|A2ANY6_MOUSE Midasin OS=Mus musculus OX=10090 GN=Mdn1 PE=1 SV=1	2	3	3	3	1	1	3	2	1	1	3	2	1	1	3	2	0.8	0.8	0.8	629.58	5582	5582;5589	0	6.7958	By MS/MS	By MS/MS	By MS/MS	By MS/MS	0.62862	0.80481	30.905	7	5	Median	NaN	NaN	0.68566	0.51337	NaN	NaN	0.83391	0.59145
A2AP40;Q8JZX4	A2AP40;Q8JZX4	2;2	2;2	2;2	Splicing factor 45	Rbm17	tr|A2AP40|A2AP40_MOUSE Splicing factor 45 (Fragment) OS=Mus musculus OX=10090 GN=Rbm17 PE=1 SV=1;sp|Q8JZX4|SPF45_MOUSE Splicing factor 45 OS=Mus musculus OX=10090 GN=Rbm17 PE=1 SV=1	2	2	2	2	2	2	2	2	2	2	2	2	2	2	2	2	17.8	17.8	17.8	13.005	118	118;405	0	3.4333	By MS/MS	By matching	By matching	By MS/MS	0.76823	1.0652	3.974	8	0	Leave out requantified	0.75641	0.65234	0.79089	0.82762	1.0473	1.1075	1.1368	1.006
A2AQA7;Q8CFQ3	A2AQA7;Q8CFQ3	1;1	1;1	1;1	Intron-binding protein aquarius	Aqr	tr|A2AQA7|A2AQA7_MOUSE RNA helicase aquarius OS=Mus musculus OX=10090 GN=Aqr PE=1 SV=1;sp|Q8CFQ3|AQR_MOUSE RNA helicase aquarius OS=Mus musculus OX=10090 GN=Aqr PE=1 SV=2	2	1	1	1	1	0	0	1	1	0	0	1	1	0	0	1	1	1	1	161.85	1400	1400;1481	0.0057225	1.7008	By MS/MS			By MS/MS	NaN	NaN	NaN	0	0	Median	NaN	NaN	NaN	NaN	NaN	NaN	NaN	NaN
A2AR01;A2AR02	A2AR01;A2AR02	1;1	1;1	1;1	Peptidyl-prolyl cis-trans isomerase;Peptidyl-prolyl cis-trans isomerase G	Ppig	tr|A2AR01|A2AR01_MOUSE Peptidyl-prolyl cis-trans isomerase (Fragment) OS=Mus musculus OX=10090 GN=Ppig PE=1 SV=1;sp|A2AR02|PPIG_MOUSE Peptidyl-prolyl cis-trans isomerase G OS=Mus musculus OX=10090 GN=Ppig PE=1 SV=1	2	1	1	1	1	1	1	1	1	1	1	1	1	1	1	1	9.4	9.4	9.4	14.236	127	127;752	0	3.0783	By MS/MS	By MS/MS	By MS/MS	By MS/MS	0.85812	1.2507	21.688	4	0	Median	NaN	NaN	NaN	NaN	NaN	NaN	NaN	NaN
A2ARF6;Q9WUR9	A2ARF6;Q9WUR9	1;1	1;1	1;1	Adenylate kinase 4, mitochondrial	Ak4	tr|A2ARF6|A2ARF6_MOUSE Adenylate kinase 4, mitochondrial (Fragment) OS=Mus musculus OX=10090 GN=Ak4 PE=1 SV=1;sp|Q9WUR9|KAD4_MOUSE Adenylate kinase 4, mitochondrial OS=Mus musculus OX=10090 GN=Ak4 PE=1 SV=1	2	1	1	1	1	1	1	1	1	1	1	1	1	1	1	1	9.6	9.6	9.6	12.513	115	115;223	0.0093284	1.5535	By MS/MS	By MS/MS	By MS/MS	By MS/MS	0.072087	0.088991	54.071	4	4	Median	NaN	NaN	NaN	NaN	NaN	NaN	NaN	NaN
A2ASB8;A2ASB7;A2ASB1;Q9CY64	A2ASB8;A2ASB7;A2ASB1;Q9CY64	1;1;1;1	1;1;1;1	1;1;1;1	Biliverdin reductase A	Blvra	tr|A2ASB8|A2ASB8_MOUSE Biliverdin reductase A OS=Mus musculus OX=10090 GN=Blvra PE=1 SV=1;tr|A2ASB7|A2ASB7_MOUSE Biliverdin reductase A (Fragment) OS=Mus musculus OX=10090 GN=Blvra PE=1 SV=8;tr|A2ASB1|A2ASB1_MOUSE Biliverdin reductase A (Fragment) OS=Mus m	4	1	1	1	0	0	0	1	0	0	0	1	0	0	0	1	11.4	11.4	11.4	15.624	140	140;151;152;295	0.0061699	1.6775				By MS/MS	NaN	NaN	NaN	0	0	Median	NaN	NaN	NaN	NaN	NaN	NaN	NaN	NaN
E9Q8N1;E9Q8K5;A2ASS6	E9Q8N1;E9Q8K5;A2ASS6	3;3;3	3;3;3	3;3;3	Titin	Ttn	tr|E9Q8N1|E9Q8N1_MOUSE Titin OS=Mus musculus OX=10090 GN=Ttn PE=1 SV=1;tr|E9Q8K5|E9Q8K5_MOUSE Titin OS=Mus musculus OX=10090 GN=Ttn PE=1 SV=1;sp|A2ASS6|TITIN_MOUSE Titin OS=Mus musculus OX=10090 GN=Ttn PE=1 SV=1	3	3	3	3	2	1	0	1	2	1	0	1	2	1	0	1	0.1	0.1	0.1	3716	33467	33467;33467;35213	0.0020725	2.2785	By MS/MS	By MS/MS		By MS/MS	0.72083	0.92364	185.9	3	1	Median	NaN	NaN	NaN	NaN	NaN	NaN	NaN	NaN
A2AT37	A2AT37	2	2	2		Upf2	tr|A2AT37|A2AT37_MOUSE UPF2 regulator of nonsense transcripts homolog (Yeast) OS=Mus musculus OX=10090 GN=Upf2 PE=1 SV=1	1	2	2	2	2	0	0	1	2	0	0	1	2	0	0	1	1.3	1.3	1.3	147.55	1269	1269	0.0025368	2.0964	By MS/MS			By MS/MS	0.91869	1.2176	14.24	2	0	Median	NaN	NaN	NaN	NaN	NaN	NaN	NaN	NaN
A2ATU9;Q8BY71	A2ATU9;Q8BY71	4;4	4;4	4;4	Histone acetyltransferase type B catalytic subunit	Hat1	tr|A2ATU9|A2ATU9_MOUSE Histone acetyltransferase type B catalytic subunit OS=Mus musculus OX=10090 GN=Hat1 PE=1 SV=1;sp|Q8BY71|HAT1_MOUSE Histone acetyltransferase type B catalytic subunit OS=Mus musculus OX=10090 GN=Hat1 PE=1 SV=1	2	4	4	4	4	2	3	1	4	2	3	1	4	2	3	1	12.3	12.3	12.3	50.182	423	423;416	0	15.197	By MS/MS	By MS/MS	By MS/MS	By MS/MS	0.099652	0.12738	94.201	9	9	Median	0.20088	0.12864	0.055053	NaN	0.2184	0.15337	0.061217	NaN
A2AU61;A2AU60;A2AU62;Q64012	A2AU61;A2AU60;A2AU62;Q64012	6;5;5;5	6;5;5;5	6;5;5;5	RNA-binding protein Raly	Raly	tr|A2AU61|A2AU61_MOUSE RNA-binding protein Raly (Fragment) OS=Mus musculus OX=10090 GN=Raly PE=1 SV=1;tr|A2AU60|A2AU60_MOUSE RNA-binding protein Raly (Fragment) OS=Mus musculus OX=10090 GN=Raly PE=1 SV=1;tr|A2AU62|A2AU62_MOUSE RNA-binding protein Raly (Fra	4	6	6	6	6	4	4	6	6	4	4	6	6	4	4	6	26.1	26.1	26.1	23.12	211	211;141;298;312	0	14.662	By MS/MS	By MS/MS	By MS/MS	By MS/MS	0.75747	1.1024	2.3705	16	6	Leave out requantified	0.69868	0.61682	0.75747	0.9049	1.0219	1.0278	1.1024	1.1094
F6VQ81;Q3TUJ9;Q8BKP1;Q3TAI4;A2AUD5;Q9CYZ2;V9GWU5	F6VQ81;Q3TUJ9;Q8BKP1;Q3TAI4;A2AUD5;Q9CYZ2;V9GWU5	5;5;5;5;5;5;4	5;5;5;5;5;5;4	5;5;5;5;5;5;4	Tumor protein D54	Tpd52l2	tr|F6VQ81|F6VQ81_MOUSE Tumor protein D54 (Fragment) OS=Mus musculus OX=10090 GN=Tpd52l2 PE=1 SV=1;tr|Q3TUJ9|Q3TUJ9_MOUSE Tumor protein D52-like 2, isoform CRA_a OS=Mus musculus OX=10090 GN=Tpd52l2 PE=1 SV=1;tr|Q8BKP1|Q8BKP1_MOUSE Tumor protein D52-like 2,	7	5	5	5	2	5	2	3	2	5	2	3	2	5	2	3	43.5	43.5	43.5	17.619	161	161;186;200;206;229;220;169	0	16.875	By MS/MS	By MS/MS	By MS/MS	By MS/MS	0.79045	1.1407	0.38843	12	4	Leave out requantified	0.78136	0.31494	0.87756	0.63501	1.104	0.37776	1.257	0.7592
A2AUR7;Q9D031;Q01730	A2AUR7;Q9D031;Q01730	1;1;1	1;1;1	1;1;1	Ras suppressor protein 1	Rsu1	tr|A2AUR7|A2AUR7_MOUSE Ras suppressor protein 1 OS=Mus musculus OX=10090 GN=Rsu1 PE=1 SV=1;tr|Q9D031|Q9D031_MOUSE Ras suppressor protein 1 OS=Mus musculus OX=10090 GN=Rsu1 PE=1 SV=1;sp|Q01730|RSU1_MOUSE Ras suppressor protein 1 OS=Mus musculus OX=10090 GN=	3	1	1	1	0	0	0	1	0	0	0	1	0	0	0	1	3.1	3.1	3.1	29.543	260	260;277;277	1	-2				By MS/MS	NaN	NaN	NaN	1	1	Median	NaN	NaN	NaN	NaN	NaN	NaN	NaN	NaN
A2AVJ7;Q99PL5	A2AVJ7;Q99PL5	13;13	13;13	13;13	Ribosome-binding protein 1	Rrbp1	tr|A2AVJ7|A2AVJ7_MOUSE Ribosome-binding protein 1 OS=Mus musculus OX=10090 GN=Rrbp1 PE=1 SV=1;sp|Q99PL5|RRBP1_MOUSE Ribosome-binding protein 1 OS=Mus musculus OX=10090 GN=Rrbp1 PE=1 SV=2	2	13	13	13	6	8	9	9	6	8	9	9	6	8	9	9	10.5	10.5	10.5	158.39	1464	1464;1605	0	49.87	By MS/MS	By MS/MS	By MS/MS	By MS/MS	0.70006	1	6.9522	29	15	Leave out requantified	0.75152	0.56093	0.66866	0.86267	1.0422	0.97858	0.96873	1.0446
A2AVR9;P62627	A2AVR9;P62627	2;2	2;2	2;2	Dynein light chain roadblock-type 1	Dynlrb1	tr|A2AVR9|A2AVR9_MOUSE Dynein light chain roadblock OS=Mus musculus OX=10090 GN=Dynlrb1 PE=1 SV=1;sp|P62627|DLRB1_MOUSE Dynein light chain roadblock-type 1 OS=Mus musculus OX=10090 GN=Dynlrb1 PE=1 SV=3	2	2	2	2	1	1	2	1	1	1	2	1	1	1	2	1	31.7	31.7	31.7	11.928	104	104;96	0	11.677	By MS/MS	By matching	By MS/MS	By MS/MS	0.79144	1.0921	105.12	5	1	Median	NaN	NaN	0.27859	NaN	NaN	NaN	0.35357	NaN
A2AW05;Q08943	A2AW05;Q08943	9;9	9;9	9;9	FACT complex subunit SSRP1	Ssrp1	tr|A2AW05|A2AW05_MOUSE FACT complex subunit SSRP1 (Fragment) OS=Mus musculus OX=10090 GN=Ssrp1 PE=1 SV=1;sp|Q08943|SSRP1_MOUSE FACT complex subunit SSRP1 OS=Mus musculus OX=10090 GN=Ssrp1 PE=1 SV=2	2	9	9	9	6	7	6	7	6	7	6	7	6	7	6	7	17.8	17.8	17.8	71.527	623	623;708	0	33.487	By MS/MS	By MS/MS	By MS/MS	By MS/MS	0.82635	1.1733	11.949	25	11	Leave out requantified	0.89035	0.70046	0.80608	0.94484	1.2462	1.185	1.1677	1.1554
A2AWA9	A2AWA9	1	1	1	Rab GTPase-activating protein 1	Rabgap1	sp|A2AWA9|RBGP1_MOUSE Rab GTPase-activating protein 1 OS=Mus musculus OX=10090 GN=Rabgap1 PE=1 SV=1	1	1	1	1	1	0	0	0	1	0	0	0	1	0	0	0	0.9	0.9	0.9	120.8	1064	1064	0.0020661	2.2588	By MS/MS				NaN	NaN	NaN	1	1	Median	NaN	NaN	NaN	NaN	NaN	NaN	NaN	NaN
A2AWT6;A2AWT7;A2AWT5;P25976;E9Q4A8;G3UZW9	A2AWT6;A2AWT7;A2AWT5;P25976;E9Q4A8	4;4;4;4;2;1	4;4;4;4;2;1	4;4;4;4;2;1	Nucleolar transcription factor 1	Ubtf	tr|A2AWT6|A2AWT6_MOUSE Nucleolar transcription factor 1 OS=Mus musculus OX=10090 GN=Ubtf PE=1 SV=1;tr|A2AWT7|A2AWT7_MOUSE Nucleolar transcription factor 1 OS=Mus musculus OX=10090 GN=Ubtf PE=1 SV=1;tr|A2AWT5|A2AWT5_MOUSE Nucleolar transcription factor 1 OS	6	4	4	4	2	3	2	2	2	3	2	2	2	3	2	2	6.5	6.5	6.5	85.009	727	727;752;764;765;169;151	0	7.6183	By MS/MS	By MS/MS	By MS/MS	By MS/MS	1.1772	1.6104	94.439	7	7	Median	NaN	0.45257	0.70138	0.94231	NaN	0.63445	0.87818	1.1517
A2BE93;Q9EQU5;A2BE92	A2BE93;Q9EQU5;A2BE92	5;5;4	5;5;4	5;5;4	Protein SET	Set	tr|A2BE93|A2BE93_MOUSE Protein SET (Fragment) OS=Mus musculus OX=10090 GN=Set PE=1 SV=1;sp|Q9EQU5|SET_MOUSE Protein SET OS=Mus musculus OX=10090 GN=Set PE=1 SV=1;tr|A2BE92|A2BE92_MOUSE Protein SET (Fragment) OS=Mus musculus OX=10090 GN=Set PE=1 SV=1	3	5	5	5	4	3	3	4	4	3	3	4	4	3	3	4	30.7	30.7	30.7	24.923	215	215;289;151	0	47.25	By MS/MS	By MS/MS	By MS/MS	By MS/MS	0.7444	1.0552	18.532	16	4	Leave out requantified	0.80056	0.66706	0.69217	0.86705	1.1235	1.1154	1.0006	1.0494
A2BFF8;Q3TPJ8;A2BFF5;A2BFF9;O88487	A2BFF8;Q3TPJ8;A2BFF5;A2BFF9;O88487	6;6;6;6;6	6;6;6;6;6	6;6;6;6;6	Cytoplasmic dynein 1 intermediate chain 2	Dync1i2	tr|A2BFF8|A2BFF8_MOUSE Cytoplasmic dynein 1 intermediate chain 2 OS=Mus musculus OX=10090 GN=Dync1i2 PE=1 SV=1;tr|Q3TPJ8|Q3TPJ8_MOUSE Cytoplasmic dynein 1 intermediate chain 2 OS=Mus musculus OX=10090 GN=Dync1i2 PE=1 SV=1;tr|A2BFF5|A2BFF5_MOUSE Cytoplasmic	5	6	6	6	2	3	3	1	2	3	3	1	2	3	3	1	15.2	15.2	15.2	68.265	611	611;632;637;638;612	0	16.699	By MS/MS	By MS/MS	By MS/MS	By MS/MS	0.71554	1.1068	4.5323	2	1	Median	NaN	NaN	NaN	NaN	NaN	NaN	NaN	NaN
L7N236;Q62012;L7MU67;B1B0X0;B1AZM2;B1AVZ5;B1AV09;A2BI02;A2AJU2	L7N236;Q62012;L7MU67;B1B0X0;B1AZM2;B1AVZ5;B1AV09;A2BI02;A2AJU2	7;7;7;7;7;7;7;7;6	7;7;7;7;7;7;7;7;6	1;1;1;1;1;1;1;1;1		Gm15127;Ott;Gm15097;Gm15107;Gm15091;Luzp4;Gm15080;Gm10439	tr|L7N236|L7N236_MOUSE Uncharacterized protein OS=Mus musculus OX=10090 GN=Gm15127 PE=4 SV=1;tr|Q62012|Q62012_MOUSE Ott protein OS=Mus musculus OX=10090 GN=Gm15085 PE=2 SV=1;tr|L7MU67|L7MU67_MOUSE Uncharacterized protein OS=Mus musculus OX=10090 GN=Gm15097	9	7	7	1	2	5	6	3	2	5	6	3	0	1	1	1	16.2	16.2	1.8	50.972	433	433;449;449;449;449;449;449;449;433	0	16.505	By MS/MS	By MS/MS	By MS/MS	By MS/MS	0.12651	0.14566	181.11	14	14	Median	0.12494	0.028557	0.13631	0.42574	0.15376	0.034047	0.15157	0.54419
A2CEK3;Q9D0F9	A2CEK3;Q9D0F9	3;3	3;3	3;3	Phosphoglucomutase-1	Pgm2;Pgm1	tr|A2CEK3|A2CEK3_MOUSE Phosphoglucomutase-2 OS=Mus musculus OX=10090 GN=Pgm2 PE=1 SV=1;sp|Q9D0F9|PGM1_MOUSE Phosphoglucomutase-1 OS=Mus musculus OX=10090 GN=Pgm1 PE=1 SV=4	2	3	3	3	0	1	1	1	0	1	1	1	0	1	1	1	4.7	4.7	4.7	63.747	580	580;562	0	3.7795		By MS/MS	By MS/MS	By MS/MS	0.30161	0.50736	54.463	3	2	Median	NaN	NaN	NaN	NaN	NaN	NaN	NaN	NaN
F8WH46;A2CF80;A2CF83;D3Z687;Q9DCT6	F8WH46;A2CF80;A2CF83;D3Z687;Q9DCT6	1;1;1;1;1	1;1;1;1;1	1;1;1;1;1	Chromatin complexes subunit BAP18	0610010K14Rik;Bap18	tr|F8WH46|F8WH46_MOUSE RIKEN cDNA 0610010K14 gene OS=Mus musculus OX=10090 GN=0610010K14Rik PE=1 SV=1;tr|A2CF80|A2CF80_MOUSE RIKEN cDNA 0610010K14 gene OS=Mus musculus OX=10090 GN=0610010K14Rik PE=1 SV=1;tr|A2CF83|A2CF83_MOUSE RIKEN cDNA 0610010K14 gene OS	5	1	1	1	0	0	0	1	0	0	0	1	0	0	0	1	17.3	17.3	17.3	8.6107	81	81;102;109;191;171	0.0015748	2.3937				By MS/MS	NaN	NaN	NaN	1	1	Median	NaN	NaN	NaN	NaN	NaN	NaN	NaN	NaN
A2CG44;E9Q3M0;Q8BUN5;Q9JIW5;Q62432;A2CG45;F7BUP2;E9Q5P9;Q8C3Y6;P97454;P70340	A2CG44;E9Q3M0;Q8BUN5;Q9JIW5;Q62432;A2CG45;F7BUP2;E9Q5P9;Q8C3Y6;P97454;P70340	2;2;2;2;2;1;1;1;1;1;1	2;2;2;2;2;1;1;1;1;1;1	2;2;2;2;2;1;1;1;1;1;1	Mothers against decapentaplegic homolog;Mothers against decapentaplegic homolog 3;Mothers against decapentaplegic homolog 9;Mothers against decapentaplegic homolog 2;Mothers against decapentaplegic homolog 5;Mothers against decapentaplegic homolog 1	Smad3;Smad2;Smad9;Smad1;Smad5	tr|A2CG44|A2CG44_MOUSE Mothers against decapentaplegic homolog (Fragment) OS=Mus musculus OX=10090 GN=Smad3 PE=1 SV=1;tr|E9Q3M0|E9Q3M0_MOUSE Mothers against decapentaplegic homolog OS=Mus musculus OX=10090 GN=Smad2 PE=1 SV=1;sp|Q8BUN5|SMAD3_MOUSE Mothers a	11	2	2	2	2	1	0	1	2	1	0	1	2	1	0	1	10.3	10.3	10.3	26.549	233	233;434;425;430;467;113;143;244;428;465;465	0	5.2399	By MS/MS	By MS/MS		By MS/MS	0.11908	0.159	62.3	3	3	Median	0.19358	NaN	NaN	NaN	0.26967	NaN	NaN	NaN
A2RSF9;Q9D1Q5	A2RSF9;Q9D1Q5	1;1	1;1	1;1		Serpinb3c;Serpinb3b	tr|A2RSF9|A2RSF9_MOUSE Serine (Or cysteine) peptidase inhibitor, clade B, member 3C OS=Mus musculus OX=10090 GN=Serpinb3c PE=1 SV=1;tr|Q9D1Q5|Q9D1Q5_MOUSE MCG21235 OS=Mus musculus OX=10090 GN=Serpinb3b PE=2 SV=1	2	1	1	1	1	0	1	1	1	0	1	1	1	0	1	1	2.3	2.3	2.3	44.369	386	386;387	0.0034809	1.9589	By MS/MS		By MS/MS	By MS/MS	0.75109	1.0466	1.347	3	0	Plateau	NaN	NaN	NaN	NaN	NaN	NaN	NaN	NaN
E9QAY5;A2RSX9;E9Q3G5;G5E8V9	E9QAY5;A2RSX9;E9Q3G5;G5E8V9	2;2;2;2	2;2;2;2	2;2;2;2		Arfip1	tr|E9QAY5|E9QAY5_MOUSE Uncharacterized protein OS=Mus musculus OX=10090 GN=Gm37240 PE=4 SV=1;tr|A2RSX9|A2RSX9_MOUSE ADP-ribosylation factor-interacting protein 1 OS=Mus musculus OX=10090 GN=Arfip1 PE=1 SV=1;tr|E9Q3G5|E9Q3G5_MOUSE ADP-ribosylation factor-in	4	2	2	2	0	2	1	0	0	2	1	0	0	2	1	0	10.7	10.7	10.7	29.16	252	252;341;366;373	0	3.64		By MS/MS	By MS/MS		0.50391	0.80564	11.883	3	1	Plateau	NaN	0.41397	NaN	NaN	NaN	0.69681	NaN	NaN
Q91YZ8;A3KFU5;A3KFU8;Q6PHQ9;V9GXG3;A2A5N3	Q91YZ8;A3KFU5;A3KFU8;Q6PHQ9	15;15;15;15;6;2	9;9;9;9;2;0	9;9;9;9;2;0	Polyadenylate-binding protein	Pabpc4	tr|Q91YZ8|Q91YZ8_MOUSE Polyadenylate-binding protein OS=Mus musculus OX=10090 GN=Pabpc4 PE=1 SV=1;tr|A3KFU5|A3KFU5_MOUSE Polyadenylate-binding protein OS=Mus musculus OX=10090 GN=Pabpc4 PE=1 SV=1;tr|A3KFU8|A3KFU8_MOUSE Polyadenylate-binding protein OS=Mus	6	15	9	9	12	7	9	8	8	3	5	5	8	3	5	5	25.9	15.1	15.1	67.852	615	615;631;644;660;168;607	0	17.774	By MS/MS	By MS/MS	By MS/MS	By MS/MS	0.67324	0.88456	25.298	16	8	Leave out requantified	0.68083	0.56964	0.61139	1.3801	0.95138	0.95829	0.883	1.6964
G8JL40;A3KG93;Q6ZQ88;F6Z4I3	G8JL40;A3KG93;Q6ZQ88;F6Z4I3	2;2;2;1	2;2;2;1	2;2;2;1	Lysine-specific histone demethylase 1A	Kdm1a	tr|G8JL40|G8JL40_MOUSE Lysine-specific histone demethylase 1A (Fragment) OS=Mus musculus OX=10090 GN=Kdm1a PE=1 SV=1;tr|A3KG93|A3KG93_MOUSE Lysine-specific histone demethylase 1A OS=Mus musculus OX=10090 GN=Kdm1a PE=1 SV=1;sp|Q6ZQ88|KDM1A_MOUSE Lysine-spec	4	2	2	2	1	2	2	1	1	2	2	1	1	2	2	1	4.2	4.2	4.2	75.422	683	683;873;853;322	0	4.4194	By MS/MS	By MS/MS	By MS/MS	By MS/MS	0.32857	0.37831	31.001	2	2	Median	NaN	NaN	NaN	NaN	NaN	NaN	NaN	NaN
E9Q2Z4;A3KGL9;B7ZCQ3;F6W687;P09602;Q5XK38;J3QM43;A0A087WR34	E9Q2Z4;A3KGL9;B7ZCQ3;F6W687;P09602;Q5XK38;J3QM43	4;4;4;4;4;3;3;1	4;4;4;4;4;3;3;1	4;4;4;4;4;3;3;1	Non-histone chromosomal protein HMG-17	Gm16494;Hmgn2;Gm6594	tr|E9Q2Z4|E9Q2Z4_MOUSE Uncharacterized protein OS=Mus musculus OX=10090 GN=Gm16494 PE=4 SV=1;tr|A3KGL9|A3KGL9_MOUSE Non-histone chromosomal protein HMG-17 OS=Mus musculus OX=10090 GN=Hmgn2 PE=1 SV=1;tr|B7ZCQ3|B7ZCQ3_MOUSE MCG12939, isoform CRA_c OS=Mus mus	8	4	4	4	4	4	4	3	4	4	4	3	4	4	4	3	31	31	31	9.3114	87	87;96;109;112;90;92;95;119	0	12.972	By MS/MS	By MS/MS	By MS/MS	By MS/MS	0.68832	1.0916	9.9062	18	0	Leave out requantified	0.70307	0.63654	0.75706	0.84305	1.0143	1.0817	1.1287	1.0545
Q6PGJ8;A3KGR9;Q9D8V0	Q6PGJ8;A3KGR9;Q9D8V0	1;1;1	1;1;1	1;1;1	Minor histocompatibility antigen H13	H13;Hm13	tr|Q6PGJ8|Q6PGJ8_MOUSE H13 protein OS=Mus musculus OX=10090 GN=H13 PE=1 SV=1;tr|A3KGR9|A3KGR9_MOUSE Histocompatibility 13 (Fragment) OS=Mus musculus OX=10090 GN=H13 PE=1 SV=1;sp|Q9D8V0|HM13_MOUSE Minor histocompatibility antigen H13 OS=Mus musculus OX=1009	3	1	1	1	0	1	1	0	0	1	1	0	0	1	1	0	5.4	5.4	5.4	24.332	224	224;347;378	0.0010701	2.5665		By MS/MS	By MS/MS		3.4981	4.0277	2.1109	2	2	Median	NaN	NaN	NaN	NaN	NaN	NaN	NaN	NaN
A3KGU7;A3KGU9;P16546;A3KGU5;E9Q447;A3KGU4	A3KGU7;A3KGU9;P16546;A3KGU5;E9Q447	51;51;51;50;50;4	51;51;51;50;50;4	51;51;51;50;50;4	Spectrin alpha chain, non-erythrocytic 1	Sptan1	tr|A3KGU7|A3KGU7_MOUSE Spectrin alpha chain, non-erythrocytic 1 OS=Mus musculus OX=10090 GN=Sptan1 PE=1 SV=1;tr|A3KGU9|A3KGU9_MOUSE Spectrin alpha chain, non-erythrocytic 1 OS=Mus musculus OX=10090 GN=Sptan1 PE=1 SV=2;sp|P16546|SPTN1_MOUSE Spectrin alpha c	6	51	51	51	33	35	35	32	33	35	35	32	33	35	35	32	25.6	25.6	25.6	285.15	2477	2477;2498;2472;2457;2478;219	0	194.17	By MS/MS	By MS/MS	By MS/MS	By MS/MS	0.77369	1.1072	15.531	114	40	Leave out requantified	0.81	0.66397	0.74833	0.8753	1.1277	1.1242	1.0783	1.0817
A6H6E9	A6H6E9	1	1	1	Tetratricopeptide repeat protein 23-like	Ttc23l	sp|A6H6E9|TT23L_MOUSE Tetratricopeptide repeat protein 23-like OS=Mus musculus OX=10090 GN=Ttc23l PE=2 SV=1	1	1	1	1	1	1	1	1	1	1	1	1	1	1	1	1	1.7	1.7	1.7	51.532	458	458	0.0044599	1.9378	By MS/MS	By MS/MS	By MS/MS	By MS/MS	0.11085	0.1377	58.646	4	4	Median	NaN	NaN	NaN	NaN	NaN	NaN	NaN	NaN
A6PWX7;F6V305;A6PWX9;Q9CWU6	A6PWX7;F6V305;A6PWX9;Q9CWU6	1;1;1;1	1;1;1;1	1;1;1;1	Ubiquinol-cytochrome-c reductase complex assembly factor 1	Uqcc1	tr|A6PWX7|A6PWX7_MOUSE Ubiquinol-cytochrome-c reductase complex assembly factor 1 OS=Mus musculus OX=10090 GN=Uqcc1 PE=1 SV=1;tr|F6V305|F6V305_MOUSE Ubiquinol-cytochrome-c reductase complex assembly factor 1 (Fragment) OS=Mus musculus OX=10090 GN=Uqcc1 PE=	4	1	1	1	1	1	0	1	1	1	0	1	1	1	0	1	4	4	4	26.589	227	227;243;269;295	0.0034861	1.972	By MS/MS	By MS/MS		By MS/MS	0.18575	0.25875	31.008	3	3	Median	NaN	NaN	NaN	NaN	NaN	NaN	NaN	NaN
F7ARZ1;A7M7Q8;Q3TI14;Q8VE22	F7ARZ1;A7M7Q8;Q3TI14;Q8VE22	1;1;1;1	1;1;1;1	1;1;1;1	28S ribosomal protein S23, mitochondrial	Mrps23	tr|F7ARZ1|F7ARZ1_MOUSE 28S ribosomal protein S23, mitochondrial (Fragment) OS=Mus musculus OX=10090 GN=Mrps23 PE=1 SV=1;tr|A7M7Q8|A7M7Q8_MOUSE 28S ribosomal protein S23, mitochondrial (Fragment) OS=Mus musculus OX=10090 GN=Mrps23 PE=1 SV=1;tr|Q3TI14|Q3TI14	4	1	1	1	1	0	0	0	1	0	0	0	1	0	0	0	11.7	11.7	11.7	13.295	120	120;121;158;177	0	3.3172	By MS/MS				NaN	NaN	NaN	1	1	Median	NaN	NaN	NaN	NaN	NaN	NaN	NaN	NaN
B0R029;E9Q8A1;B0R030;Q9D3L3;O09044	B0R029;E9Q8A1;B0R030;Q9D3L3;O09044	1;1;1;1;1	1;1;1;1;1	1;1;1;1;1	Synaptosomal-associated protein;Synaptosomal-associated protein 23	Snap23	tr|B0R029|B0R029_MOUSE Synaptosomal-associated protein 23 (Fragment) OS=Mus musculus OX=10090 GN=Snap23 PE=1 SV=8;tr|E9Q8A1|E9Q8A1_MOUSE Synaptosomal-associated protein 23 OS=Mus musculus OX=10090 GN=Snap23 PE=1 SV=1;tr|B0R030|B0R030_MOUSE Synaptosomal-ass	5	1	1	1	1	0	0	0	1	0	0	0	1	0	0	0	16.5	16.5	16.5	9.5948	85	85;98;161;221;210	0.0025304	2.0853	By MS/MS				NaN	NaN	NaN	1	1	Median	NaN	NaN	NaN	NaN	NaN	NaN	NaN	NaN
B0R091;P61022	B0R091;P61022	1;1	1;1	1;1	Calcineurin B homologous protein 1	Chp1	tr|B0R091|B0R091_MOUSE Calcineurin B homologous protein 1 OS=Mus musculus OX=10090 GN=Chp1 PE=1 SV=1;sp|P61022|CHP1_MOUSE Calcineurin B homologous protein 1 OS=Mus musculus OX=10090 GN=Chp1 PE=1 SV=2	2	1	1	1	0	0	1	0	0	0	1	0	0	0	1	0	5.8	5.8	5.8	21.997	191	191;195	0.0025536	2.1564			By MS/MS		NaN	NaN	NaN	0	0	Median	NaN	NaN	NaN	NaN	NaN	NaN	NaN	NaN
B1AQD7;B1AQD9;Q9Z2R6;Q8C4B4	B1AQD7;B1AQD9;Q9Z2R6;Q8C4B4	1;1;1;1	1;1;1;1	1;1;1;1	Protein unc-119 homolog A;Protein unc-119 homolog B	Unc119;Unc119b	tr|B1AQD7|B1AQD7_MOUSE Protein unc-119 homolog A OS=Mus musculus OX=10090 GN=Unc119 PE=1 SV=1;tr|B1AQD9|B1AQD9_MOUSE Protein unc-119 homolog A OS=Mus musculus OX=10090 GN=Unc119 PE=1 SV=1;sp|Q9Z2R6|U119A_MOUSE Protein unc-119 homolog A OS=Mus musculus OX=1	4	1	1	1	0	1	1	1	0	1	1	1	0	1	1	1	5.1	5.1	5.1	20.742	175	175;262;240;251	0	3.5052		By MS/MS	By MS/MS	By MS/MS	0.42459	0.5062	22.894	2	2	Median	NaN	NaN	NaN	NaN	NaN	NaN	NaN	NaN
B1ASE2;Q9DCX2	B1ASE2;Q9DCX2	6;6	6;6	6;6	ATP synthase subunit d, mitochondrial	Atp5h	tr|B1ASE2|B1ASE2_MOUSE ATP synthase subunit d, mitochondrial (Fragment) OS=Mus musculus OX=10090 GN=Atp5h PE=1 SV=1;sp|Q9DCX2|ATP5H_MOUSE ATP synthase subunit d, mitochondrial OS=Mus musculus OX=10090 GN=Atp5h PE=1 SV=3	2	6	6	6	3	5	5	4	3	5	5	4	3	5	5	4	37.7	37.7	37.7	15.882	138	138;161	0	27.687	By MS/MS	By MS/MS	By MS/MS	By MS/MS	0.60802	0.87638	11.495	19	7	Leave out requantified	0.60956	0.45793	0.60802	0.74426	0.86694	0.81151	0.92732	0.92861
B1AT10;Q920Q6;B1AT13	B1AT10;Q920Q6;B1AT13	2;2;1	2;2;1	2;2;1	RNA-binding protein Musashi homolog 2	Msi2	tr|B1AT10|B1AT10_MOUSE RNA-binding protein Musashi homolog 2 (Fragment) OS=Mus musculus OX=10090 GN=Msi2 PE=1 SV=1;sp|Q920Q6|MSI2H_MOUSE RNA-binding protein Musashi homolog 2 OS=Mus musculus OX=10090 GN=Msi2 PE=1 SV=1;tr|B1AT13|B1AT13_MOUSE RNA-binding pro	3	2	2	2	2	1	2	2	2	1	2	2	2	1	2	2	27.4	27.4	27.4	12.821	113	113;346;158	0	7.7831	By MS/MS	By MS/MS	By MS/MS	By MS/MS	0.5758	0.8172	15.225	7	0	Leave out requantified	0.58391	NaN	0.60515	0.69606	0.83915	NaN	0.88345	0.8473
B1AT82;Q9D0M1;B1AT84;B1AT83	B1AT82;Q9D0M1;B1AT84;B1AT83	3;3;2;2	3;3;2;2	3;3;2;2	Phosphoribosyl pyrophosphate synthase-associated protein 1	Prpsap1	tr|B1AT82|B1AT82_MOUSE MCG6846, isoform CRA_c OS=Mus musculus OX=10090 GN=Prpsap1 PE=1 SV=1;sp|Q9D0M1|KPRA_MOUSE Phosphoribosyl pyrophosphate synthase-associated protein 1 OS=Mus musculus OX=10090 GN=Prpsap1 PE=1 SV=1;tr|B1AT84|B1AT84_MOUSE Phosphoribosyl	4	3	3	3	0	3	2	0	0	3	2	0	0	3	2	0	10.4	10.4	10.4	42.467	385	385;356;175;195	0	8.8487		By MS/MS	By MS/MS		0.60515	0.86069	41.706	6	4	Median	NaN	0.48538	0.63595	NaN	NaN	0.80002	0.88615	NaN
B1AT92;Q60631;B1AT95	B1AT92;Q60631	6;6;1	6;6;1	6;6;1	Growth factor receptor-bound protein 2	Grb2	tr|B1AT92|B1AT92_MOUSE Growth factor receptor-bound protein 2 OS=Mus musculus OX=10090 GN=Grb2 PE=1 SV=1;sp|Q60631|GRB2_MOUSE Growth factor receptor-bound protein 2 OS=Mus musculus OX=10090 GN=Grb2 PE=1 SV=1	3	6	6	6	2	2	3	4	2	2	3	4	2	2	3	4	29.1	29.1	29.1	23.587	203	203;217;71	0	10.81	By MS/MS	By MS/MS	By MS/MS	By MS/MS	0.8077	1.2582	7.8038	8	4	Leave out requantified	NaN	0.75903	0.63055	0.20876	NaN	1.2905	0.91535	0.24785
B1AV77;B1ATI0;P47740	B1AV77;B1ATI0;P47740	1;1;1	1;1;1	1;1;1	Aldehyde dehydrogenase;Fatty aldehyde dehydrogenase	Aldh3a2	tr|B1AV77|B1AV77_MOUSE Aldehyde dehydrogenase OS=Mus musculus OX=10090 GN=Aldh3a2 PE=1 SV=1;tr|B1ATI0|B1ATI0_MOUSE Aldehyde dehydrogenase OS=Mus musculus OX=10090 GN=Aldh3a2 PE=1 SV=1;sp|P47740|AL3A2_MOUSE Fatty aldehyde dehydrogenase OS=Mus musculus OX=10	3	1	1	1	0	0	0	1	0	0	0	1	0	0	0	1	3.5	3.5	3.5	54.33	487	487;532;484	0.0010712	2.5687				By MS/MS	NaN	NaN	NaN	1	0	Median	NaN	NaN	NaN	NaN	NaN	NaN	NaN	NaN
B1ATL6;P47809	B1ATL6;P47809	1;1	1;1	1;1	Dual specificity mitogen-activated protein kinase kinase 4	Map2k4	tr|B1ATL6|B1ATL6_MOUSE Dual-specificity mitogen-activated protein kinase kinase 4 (Fragment) OS=Mus musculus OX=10090 GN=Map2k4 PE=1 SV=1;sp|P47809|MP2K4_MOUSE Dual specificity mitogen-activated protein kinase kinase 4 OS=Mus musculus OX=10090 GN=Map2k4 PE	2	1	1	1	0	0	0	1	0	0	0	1	0	0	0	1	8.3	8.3	8.3	22.475	206	206;397	0.0025681	2.1942				By MS/MS	NaN	NaN	NaN	0	0	Median	NaN	NaN	NaN	NaN	NaN	NaN	NaN	NaN
B1ATP7;Q80Y81	B1ATP7;Q80Y81	1;1	1;1	1;1	Zinc phosphodiesterase ELAC protein 2	Elac2	tr|B1ATP7|B1ATP7_MOUSE Zinc phosphodiesterase ELAC protein 2 OS=Mus musculus OX=10090 GN=Elac2 PE=1 SV=1;sp|Q80Y81|RNZ2_MOUSE Zinc phosphodiesterase ELAC protein 2 OS=Mus musculus OX=10090 GN=Elac2 PE=1 SV=1	2	1	1	1	0	1	0	0	0	1	0	0	0	1	0	0	1.3	1.3	1.3	91.946	823	823;831	0.0030136	2.0303		By MS/MS			NaN	NaN	NaN	1	1	Median	NaN	NaN	NaN	NaN	NaN	NaN	NaN	NaN
B1AU75;Q99MD9;B1AU76	B1AU75;Q99MD9;B1AU76	13;13;9	13;13;9	13;13;9	Nuclear autoantigenic sperm protein	Nasp	tr|B1AU75|B1AU75_MOUSE Nuclear autoantigenic sperm protein OS=Mus musculus OX=10090 GN=Nasp PE=1 SV=1;sp|Q99MD9|NASP_MOUSE Nuclear autoantigenic sperm protein OS=Mus musculus OX=10090 GN=Nasp PE=1 SV=2;tr|B1AU76|B1AU76_MOUSE Nuclear autoantigenic sperm pro	3	13	13	13	9	9	9	10	9	9	9	10	9	9	9	10	19.5	19.5	19.5	84.012	773	773;773;448	0	63.048	By MS/MS	By MS/MS	By MS/MS	By MS/MS	0.63455	0.90017	24.437	42	16	Leave out requantified	0.60574	0.54541	0.66182	0.74801	0.84825	0.92003	0.95139	0.92854
B1AUN0;Q8BH43	B1AUN0;Q8BH43	1;1	1;1	1;1	Wiskott-Aldrich syndrome protein family member 2	Wasf2	tr|B1AUN0|B1AUN0_MOUSE Wiskott-Aldrich syndrome protein family member 2 (Fragment) OS=Mus musculus OX=10090 GN=Wasf2 PE=1 SV=1;sp|Q8BH43|WASF2_MOUSE Wiskott-Aldrich syndrome protein family member 2 OS=Mus musculus OX=10090 GN=Wasf2 PE=1 SV=1	2	1	1	1	1	0	0	1	1	0	0	1	1	0	0	1	11.8	11.8	11.8	9.5438	85	85;497	0.0010875	2.6943	By MS/MS			By MS/MS	NaN	NaN	NaN	0	0	Median	NaN	NaN	NaN	NaN	NaN	NaN	NaN	NaN
B1AUN3;Q3UKV0;B1AUN2	B1AUN3;Q3UKV0;B1AUN2	4;4;4	4;4;4	4;4;4		Eif2b3	tr|B1AUN3|B1AUN3_MOUSE Eukaryotic translation initiation factor 2B, subunit 3 OS=Mus musculus OX=10090 GN=Eif2b3 PE=1 SV=1;tr|Q3UKV0|Q3UKV0_MOUSE Eukaryotic translation initiation factor 2B, subunit 3 OS=Mus musculus OX=10090 GN=Eif2b3 PE=1 SV=1;tr|B1AUN2|	3	4	4	4	1	1	2	0	1	1	2	0	1	1	2	0	11.5	11.5	11.5	45.065	401	401;445;452	0	7.5075	By MS/MS	By MS/MS	By MS/MS		0.38875	0.60442	49.467	4	2	Median	NaN	NaN	0.35228	NaN	NaN	NaN	0.44537	NaN
B1AUQ7;Z4YJH1;Q9R1K9;P41209	B1AUQ7;Z4YJH1;Q9R1K9;P41209	1;1;1;1	1;1;1;1	1;1;1;1	Centrin-2;Centrin-1	Cetn2;Cetn1	tr|B1AUQ7|B1AUQ7_MOUSE Centrin-2 (Fragment) OS=Mus musculus OX=10090 GN=Cetn2 PE=1 SV=1;tr|Z4YJH1|Z4YJH1_MOUSE Centrin-2 OS=Mus musculus OX=10090 GN=Cetn2 PE=1 SV=1;sp|Q9R1K9|CETN2_MOUSE Centrin-2 OS=Mus musculus OX=10090 GN=Cetn2 PE=1 SV=1;sp|P41209|CETN1	4	1	1	1	1	1	0	1	1	1	0	1	1	1	0	1	8.1	8.1	8.1	12.715	111	111;163;172;172	0.0044313	1.9152	By MS/MS	By matching		By matching	1.1058	1.3443	28.923	3	0	Median	NaN	NaN	NaN	NaN	NaN	NaN	NaN	NaN
B1AUX2;Q61191	B1AUX2;Q61191	8;8	8;8	8;8	Host cell factor 1;HCF N-terminal chain 1;HCF N-terminal chain 2;HCF N-terminal chain 3;HCF N-terminal chain 4;HCF N-terminal chain 5;HCF N-terminal chain 6;HCF C-terminal chain 1;HCF C-terminal chain 2;HCF C-terminal chain 3;HCF C-terminal chain 4;HCF C-terminal chain 5;HCF C-terminal chain 6	Hcfc1	tr|B1AUX2|B1AUX2_MOUSE Host cell factor 1 OS=Mus musculus OX=10090 GN=Hcfc1 PE=1 SV=1;sp|Q61191|HCFC1_MOUSE Host cell factor 1 OS=Mus musculus OX=10090 GN=Hcfc1 PE=1 SV=2	2	8	8	8	7	5	4	5	7	5	4	5	7	5	4	5	4.5	4.5	4.5	215.05	2090	2090;2045	0	17.722	By MS/MS	By MS/MS	By MS/MS	By MS/MS	0.82005	1.1875	12.523	18	4	Leave out requantified	0.89088	0.7205	0.75099	1.0579	1.2378	1.2196	1.0857	1.2966
B1AUY9;B1AUZ1;Q9CQX6;B1AUY8;Q3V4D5;B1AUY7;Q3UX61;Q9QY36	B1AUY9;B1AUZ1;Q9CQX6;B1AUY8;Q3V4D5;B1AUY7;Q3UX61;Q9QY36	2;2;2;2;2;2;2;2	2;2;2;2;2;2;2;2	2;2;2;2;2;2;2;2	N-alpha-acetyltransferase 11;N-alpha-acetyltransferase 10	Naa10;Gm16286;Naa11	tr|B1AUY9|B1AUY9_MOUSE N-alpha-acetyltransferase 10 OS=Mus musculus OX=10090 GN=Naa10 PE=1 SV=1;tr|B1AUZ1|B1AUZ1_MOUSE N-alpha-acetyltransferase 10 OS=Mus musculus OX=10090 GN=Naa10 PE=1 SV=1;tr|Q9CQX6|Q9CQX6_MOUSE MCG141091, isoform CRA_a OS=Mus musculus	8	2	2	2	2	2	2	1	2	2	2	1	2	2	2	1	15.9	15.9	15.9	19.57	170	170;206;220;220;225;233;218;235	0	3.4299	By matching	By MS/MS	By MS/MS	By matching	0.68372	1.0288	2.7599	7	0	Leave out requantified	0.77481	0.63525	0.66557	NaN	1.0849	1.0727	0.96937	NaN
B1AV14;Q78IK4	B1AV14;Q78IK4	1;1	1;1	1;1	MICOS complex subunit Mic27	Apool	tr|B1AV14|B1AV14_MOUSE MICOS complex subunit OS=Mus musculus OX=10090 GN=Apool PE=1 SV=1;sp|Q78IK4|MIC27_MOUSE MICOS complex subunit Mic27 OS=Mus musculus OX=10090 GN=Apool PE=1 SV=1	2	1	1	1	1	1	1	0	1	1	1	0	1	1	1	0	8.3	8.3	8.3	21.063	192	192;265	0	2.7289	By MS/MS	By MS/MS	By MS/MS		NaN	NaN	NaN	1	1	Median	NaN	NaN	NaN	NaN	NaN	NaN	NaN	NaN
B1AWE0;Q6PFA2;B1AWE1;B1AWD8;B1AWD9;O08585	B1AWE0;Q6PFA2;B1AWE1;B1AWD8;B1AWD9;O08585	3;3;2;2;2;2	3;3;2;2;2;2	3;3;2;2;2;2	Clathrin light chain A	Clta	tr|B1AWE0|B1AWE0_MOUSE Clathrin light chain OS=Mus musculus OX=10090 GN=Clta PE=1 SV=1;tr|Q6PFA2|Q6PFA2_MOUSE Clathrin light chain OS=Mus musculus OX=10090 GN=Clta PE=1 SV=1;tr|B1AWE1|B1AWE1_MOUSE Clathrin light chain OS=Mus musculus OX=10090 GN=Clta PE=1	6	3	3	3	1	2	2	1	1	2	2	1	1	2	2	1	16.7	16.7	16.7	23.478	216	216;218;230;236;248;235	0	8.5224	By MS/MS	By MS/MS	By MS/MS	By MS/MS	0.61999	0.90812	149.71	5	1	Median	NaN	NaN	0.13722	NaN	NaN	NaN	0.17331	NaN
B1AXN9;P18654;F6UG16;B1AXN8;B1AXN5;B1AXP0;E9PWV3;Q505N6;F6RQA2;F6Q8A4;P18653;Q9WUT3	B1AXN9;P18654;F6UG16;B1AXN8;B1AXN5;B1AXP0;E9PWV3;Q505N6;F6RQA2;F6Q8A4;P18653;Q9WUT3	2;2;1;1;1;1;1;1;1;1;1;1	2;2;1;1;1;1;1;1;1;1;1;1	2;2;1;1;1;1;1;1;1;1;1;1	Ribosomal protein S6 kinase alpha-3;Ribosomal protein S6 kinase;Ribosomal protein S6 kinase alpha-1;Ribosomal protein S6 kinase alpha-2	Rps6ka3;Rps6ka1;Rps6ka2	tr|B1AXN9|B1AXN9_MOUSE Non-specific serine/threonine protein kinase OS=Mus musculus OX=10090 GN=Rps6ka3 PE=1 SV=1;sp|P18654|KS6A3_MOUSE Ribosomal protein S6 kinase alpha-3 OS=Mus musculus OX=10090 GN=Rps6ka3 PE=1 SV=2;tr|F6UG16|F6UG16_MOUSE Ribosomal prote	12	2	2	2	0	1	0	1	0	1	0	1	0	1	0	1	3.1	3.1	3.1	80.669	712	712;740;129;135;172;211;719;735;736;741;724;733	0	5.4172		By MS/MS		By MS/MS	0.67132	0.98767	51.988	2	2	Median	NaN	NaN	NaN	NaN	NaN	NaN	NaN	NaN
B1AXZ0;Q80UJ0;Q3UR02;Q80Y51;B1AXZ6;B1AXZ4;B1AXZ5;Q60899;A2A9S3;A2A9S2;A2A9R8;A2A9R6;Q8BVA9;A2A9S0;Q61701;H3BLG7;A2A9R4;Q60900	B1AXZ0;Q80UJ0;Q3UR02;Q80Y51;B1AXZ6;B1AXZ4;B1AXZ5;Q60899;A2A9S3;A2A9S2;A2A9R8;A2A9R6;Q8BVA9;A2A9S0;Q61701	4;4;4;4;4;4;4;4;3;3;3;3;3;3;3;1;1;1	3;3;3;3;3;3;3;3;2;2;2;2;2;2;2;1;1;1	3;3;3;3;3;3;3;3;2;2;2;2;2;2;2;1;1;1	ELAV-like protein;ELAV-like protein 2;ELAV-like protein 4	Elavl2;Elavl4	tr|B1AXZ0|B1AXZ0_MOUSE ELAV-like protein OS=Mus musculus OX=10090 GN=Elavl2 PE=1 SV=1;tr|Q80UJ0|Q80UJ0_MOUSE ELAV-like protein OS=Mus musculus OX=10090 GN=Elavl2 PE=1 SV=2;tr|Q3UR02|Q3UR02_MOUSE ELAV-like protein OS=Mus musculus OX=10090 GN=Elavl2 PE=1 SV=	18	4	3	3	4	3	2	4	3	2	2	3	3	2	2	3	12.7	10.1	10.1	38.001	346	346;347;359;373;376;388;389;360;356;366;366;371;380;383;385;125;137;367	0	6.811	By MS/MS	By MS/MS	By MS/MS	By MS/MS	0.62598	0.86268	114.17	9	5	Median	0.57034	0.17421	NaN	0.75457	0.78849	0.24859	NaN	0.9148
B1AZI6	B1AZI6	2	2	2	THO complex subunit 2	Thoc2	sp|B1AZI6|THOC2_MOUSE THO complex subunit 2 OS=Mus musculus OX=10090 GN=Thoc2 PE=1 SV=1	1	2	2	2	1	2	1	1	1	2	1	1	1	2	1	1	1.4	1.4	1.4	182.77	1594	1594	0.001084	2.6735	By matching	By matching	By MS/MS	By MS/MS	0.63067	0.94756	3.7927	5	0	Leave out requantified	NaN	0.57844	NaN	NaN	NaN	0.96341	NaN	NaN
B1B1A8;Q6PDN3	B1B1A8;Q6PDN3	1;1	1;1	1;1	Myosin light chain kinase, smooth muscle;Myosin light chain kinase, smooth muscle, deglutamylated form	Mylk	tr|B1B1A8|B1B1A8_MOUSE Myosin light chain kinase, smooth muscle OS=Mus musculus OX=10090 GN=Mylk PE=1 SV=1;sp|Q6PDN3|MYLK_MOUSE Myosin light chain kinase, smooth muscle OS=Mus musculus OX=10090 GN=Mylk PE=1 SV=3	2	1	1	1	0	1	1	0	0	1	1	0	0	1	1	0	0.4	0.4	0.4	213.61	1950	1950;1941	0.0093327	1.556		By MS/MS	By MS/MS		0.064414	0.074166	10.293	2	2	Median	NaN	NaN	NaN	NaN	NaN	NaN	NaN	NaN
B2KF34;B2KF35;P47811	B2KF34;B2KF35;P47811	1;1;1	1;1;1	1;1;1	Mitogen-activated protein kinase 14	Mapk14	tr|B2KF34|B2KF34_MOUSE Mitogen-activated protein kinase (Fragment) OS=Mus musculus OX=10090 GN=Mapk14 PE=1 SV=1;tr|B2KF35|B2KF35_MOUSE Mitogen-activated protein kinase OS=Mus musculus OX=10090 GN=Mapk14 PE=1 SV=1;sp|P47811|MK14_MOUSE Mitogen-activated prot	3	1	1	1	1	0	0	0	1	0	0	0	1	0	0	0	7.4	7.4	7.4	23.707	203	203;258;360	0	3.5409	By MS/MS				NaN	NaN	NaN	1	1	Median	NaN	NaN	NaN	NaN	NaN	NaN	NaN	NaN
B2M1R6;P61979;H3BLL4;H3BKD0;A0A286YDM3;H3BK96;H3BKI8;A0A286YCM2;A0A286YEC4;H3BLP7;Q8BT23;A0A286YDH1;H3BJ43;H3BJS9;A0A286YE41	B2M1R6;P61979;H3BLL4;H3BKD0;A0A286YDM3;H3BK96;H3BKI8;A0A286YCM2	18;18;13;12;10;10;9;9;6;6;5;5;3;3;2	18;18;13;12;10;10;9;9;6;6;5;5;3;3;2	18;18;13;12;10;10;9;9;6;6;5;5;3;3;2	Heterogeneous nuclear ribonucleoprotein K	Hnrnpk	tr|B2M1R6|B2M1R6_MOUSE Heterogeneous nuclear ribonucleoprotein K OS=Mus musculus OX=10090 GN=Hnrnpk PE=1 SV=1;sp|P61979|HNRPK_MOUSE Heterogeneous nuclear ribonucleoprotein K OS=Mus musculus OX=10090 GN=Hnrnpk PE=1 SV=1;tr|H3BLL4|H3BLL4_MOUSE Heterogeneous	15	18	18	18	16	14	15	16	16	14	15	16	16	14	15	16	42.3	42.3	42.3	48.562	440	440;463;394;299;230;256;178;192;150;210;97;143;77;87;52	0	138.34	By MS/MS	By MS/MS	By MS/MS	By MS/MS	0.75963	1.0917	3.5036	59	24	Leave out requantified	0.76456	0.67765	0.75479	0.88053	1.074	1.1259	1.0829	1.0828
D3Z5B1;B2RPU8;Q9D1L0	D3Z5B1;B2RPU8;Q9D1L0	3;3;3	3;3;3	3;3;3	Coiled-coil-helix-coiled-coil-helix domain-containing protein 2	Zbed5;Chchd2	tr|D3Z5B1|D3Z5B1_MOUSE Zinc finger, BED type-containing 5 (Fragment) OS=Mus musculus OX=10090 GN=Zbed5 PE=4 SV=8;tr|B2RPU8|B2RPU8_MOUSE MCG130675 OS=Mus musculus OX=10090 GN=Zbed5 PE=1 SV=1;sp|Q9D1L0|CHCH2_MOUSE Coiled-coil-helix-coiled-coil-helix domain-c	3	3	3	3	2	2	1	1	2	2	1	1	2	2	1	1	25.7	25.7	25.7	19.183	183	183;756;153	0	13.129	By MS/MS	By MS/MS	By MS/MS	By MS/MS	0.79842	1.1816	92.097	5	1	Median	NaN	0.33565	NaN	NaN	NaN	0.47869	NaN	NaN
E9QAI5;B2RQC6;G3UWN2;E9QAT6;F6S3Z3;Q8C196	E9QAI5;B2RQC6;G3UWN2	38;38;37;18;1;1	38;38;37;18;1;1	38;38;37;18;1;1	CAD protein;Glutamine-dependent carbamoyl-phosphate synthase;Aspartate carbamoyltransferase;Dihydroorotase	Cad	tr|E9QAI5|E9QAI5_MOUSE CAD protein OS=Mus musculus OX=10090 GN=Cad PE=1 SV=1;sp|B2RQC6|PYR1_MOUSE CAD protein OS=Mus musculus OX=10090 GN=Cad PE=1 SV=1;tr|G3UWN2|G3UWN2_MOUSE CAD protein OS=Mus musculus OX=10090 GN=Cad PE=1 SV=1	6	38	38	38	21	23	25	23	21	23	25	23	21	23	25	23	23.8	23.8	23.8	236.25	2162	2162;2225;2164;971;194;1500	0	145.59	By MS/MS	By MS/MS	By MS/MS	By MS/MS	0.80033	1.078	8.2306	73	43	Leave out requantified	0.7648	0.66806	0.74689	0.89404	1.0707	1.1394	1.1062	1.1026
B2RUJ2;B7ZNX6;Q80TH2	B2RUJ2;B7ZNX6;Q80TH2	1;1;1	1;1;1	1;1;1	Protein LAP2	Erbb2ip	tr|B2RUJ2|B2RUJ2_MOUSE Erbb2ip protein OS=Mus musculus OX=10090 GN=Erbin PE=1 SV=1;tr|B7ZNX6|B7ZNX6_MOUSE Erbb2ip protein OS=Mus musculus OX=10090 GN=Erbin PE=1 SV=1;sp|Q80TH2|ERBIN_MOUSE Erbin OS=Mus musculus OX=10090 GN=Erbin PE=1 SV=3	3	1	1	1	0	0	0	1	0	0	0	1	0	0	0	1	0.9	0.9	0.9	145.09	1294	1294;1411;1402	0.0044401	1.916				By MS/MS	NaN	NaN	NaN	1	1	Median	NaN	NaN	NaN	NaN	NaN	NaN	NaN	NaN
S4R2B0;B2RY56;S4R1X9;S4R2J1;S4R2F7;S4R2A4	S4R2B0;B2RY56;S4R1X9;S4R2J1;S4R2F7;S4R2A4	2;2;1;1;1;1	2;2;1;1;1;1	2;2;1;1;1;1	RNA-binding protein 25	Rbm25	tr|S4R2B0|S4R2B0_MOUSE RNA-binding protein 25 (Fragment) OS=Mus musculus OX=10090 GN=Rbm25 PE=1 SV=1;sp|B2RY56|RBM25_MOUSE RNA-binding protein 25 OS=Mus musculus OX=10090 GN=Rbm25 PE=1 SV=2;tr|S4R1X9|S4R1X9_MOUSE RNA-binding protein 25 OS=Mus musculus OX=1	6	2	2	2	1	2	1	1	1	2	1	1	1	2	1	1	2.6	2.6	2.6	71.006	585	585;838;163;174;194;194	0	2.8846	By MS/MS	By MS/MS	By MS/MS	By MS/MS	NaN	NaN	NaN	0	0	Median	NaN	NaN	NaN	NaN	NaN	NaN	NaN	NaN
B7FAU9;Q8BTM8;B7FAV1;F6XC15;J3JS91;F6Z2C0;F7AVL7	B7FAU9;Q8BTM8;B7FAV1	79;79;78;16;5;5;1	79;79;78;16;5;5;1	74;74;73;12;4;5;1	Filamin-A	Flna	tr|B7FAU9|B7FAU9_MOUSE Filamin, alpha OS=Mus musculus OX=10090 GN=Flna PE=1 SV=1;sp|Q8BTM8|FLNA_MOUSE Filamin-A OS=Mus musculus OX=10090 GN=Flna PE=1 SV=5;tr|B7FAV1|B7FAV1_MOUSE Filamin, alpha (Fragment) OS=Mus musculus OX=10090 GN=Flna PE=1 SV=1	7	79	79	74	53	64	58	60	53	64	58	60	50	59	53	58	39.1	39.1	38	280.5	2639	2639;2647;2583;511;277;280;74	0	323.31	By MS/MS	By MS/MS	By MS/MS	By MS/MS	0.72965	1.0395	20.349	267	70	Leave out requantified	0.7542	0.62151	0.70405	0.82793	1.0755	1.0456	1.0295	1.0188
B7ZC18;P42227	B7ZC18;P42227	1;1	1;1	1;1	Signal transducer and activator of transcription;Signal transducer and activator of transcription 3	Stat3	tr|B7ZC18|B7ZC18_MOUSE Signal transducer and activator of transcription OS=Mus musculus OX=10090 GN=Stat3 PE=1 SV=1;sp|P42227|STAT3_MOUSE Signal transducer and activator of transcription 3 OS=Mus musculus OX=10090 GN=Stat3 PE=1 SV=2	2	1	1	1	0	0	1	0	0	0	1	0	0	0	1	0	1.6	1.6	1.6	84.88	744	744;770	0.0093371	1.5567			By MS/MS		NaN	NaN	NaN	0	0	Median	NaN	NaN	NaN	NaN	NaN	NaN	NaN	NaN
B7ZC23;Q91W39;B7ZC24	B7ZC23;Q91W39;B7ZC24	2;2;1	2;2;1	2;2;1	Nuclear receptor coactivator 5	Ncoa5	tr|B7ZC23|B7ZC23_MOUSE Nuclear receptor coactivator 5 OS=Mus musculus OX=10090 GN=Ncoa5 PE=1 SV=1;sp|Q91W39|NCOA5_MOUSE Nuclear receptor coactivator 5 OS=Mus musculus OX=10090 GN=Ncoa5 PE=1 SV=1;tr|B7ZC24|B7ZC24_MOUSE Nuclear receptor coactivator 5 OS=Mus	3	2	2	2	1	2	0	0	1	2	0	0	1	2	0	0	10	10	10	31.554	299	299;579;406	0	4.3753	By MS/MS	By MS/MS			0.1309	0.16869	2.0071	2	2	Median	NaN	NaN	NaN	NaN	NaN	NaN	NaN	NaN
B7ZCP4;Q8C166;B7ZCP7;V9GXM6;F6R587;B7ZCP6;B7ZCP5;E9Q806;A3KGK7	B7ZCP4;Q8C166;B7ZCP7;V9GXM6;F6R587;B7ZCP6;B7ZCP5;E9Q806;A3KGK7	2;2;1;1;1;1;1;1;1	2;2;1;1;1;1;1;1;1	2;2;1;1;1;1;1;1;1	Copine-1	Cpne1	tr|B7ZCP4|B7ZCP4_MOUSE Copine-1 OS=Mus musculus OX=10090 GN=Cpne1 PE=1 SV=1;sp|Q8C166|CPNE1_MOUSE Copine-1 OS=Mus musculus OX=10090 GN=Cpne1 PE=1 SV=1;tr|B7ZCP7|B7ZCP7_MOUSE Copine-1 (Fragment) OS=Mus musculus OX=10090 GN=Cpne1 PE=1 SV=1;tr|V9GXM6|V9GXM6_M	9	2	2	2	1	1	1	2	1	1	1	2	1	1	1	2	3.8	3.8	3.8	52.853	480	480;536;178;197;211;230;325;350;378	0	3.7216	By MS/MS	By MS/MS	By MS/MS	By MS/MS	2.5268	3.1149	94.672	4	1	Linear	NaN	NaN	NaN	1.1103	NaN	NaN	NaN	1.4192
B7ZNL2;Q78ZA7;A0A140LJB5;A0A140LJ37;A0A140LI78	B7ZNL2;Q78ZA7;A0A140LJB5	5;5;3;2;1	4;4;2;2;1	4;4;2;2;1	Nucleosome assembly protein 1-like 4	Nap1l4	tr|B7ZNL2|B7ZNL2_MOUSE Nap1l4 protein OS=Mus musculus OX=10090 GN=Nap1l4 PE=1 SV=1;sp|Q78ZA7|NP1L4_MOUSE Nucleosome assembly protein 1-like 4 OS=Mus musculus OX=10090 GN=Nap1l4 PE=1 SV=1;tr|A0A140LJB5|A0A140LJB5_MOUSE Nucleosome assembly protein 1-like 4 (	5	5	4	4	3	3	5	3	2	3	4	3	2	3	4	3	18.4	15.8	15.8	43.934	386	386;375;219;75;58	0	15.754	By MS/MS	By MS/MS	By MS/MS	By MS/MS	0.6121	0.86592	37.354	11	2	Leave out requantified	0.62886	0.48421	0.60706	0.81279	0.86639	0.81439	0.88131	1.0036
B9EJR8;B2RY24	B9EJR8	3;1	3;1	3;1	Dynein assembly factor 5, axonemal	Dnaaf5	sp|B9EJR8|DAAF5_MOUSE Dynein assembly factor 5, axonemal OS=Mus musculus OX=10090 GN=Dnaaf5 PE=1 SV=1	2	3	3	3	0	0	2	1	0	0	2	1	0	0	2	1	4.8	4.8	4.8	93.85	853	853;558	0	3.9925			By MS/MS	By MS/MS	NaN	NaN	NaN	1	1	Median	NaN	NaN	NaN	NaN	NaN	NaN	NaN	NaN
C0H5X4;Q61411;P32883;B2KGV5;E9Q8V2;E9PVD5;A0A0G2JGM2;A0A0N4SVY1;A0A0G2JE25;A0A0G2JGP4;Q9D091;P08556	C0H5X4;Q61411;P32883;B2KGV5;E9Q8V2;E9PVD5;A0A0G2JGM2;A0A0N4SVY1;A0A0G2JE25;A0A0G2JGP4;Q9D091;P08556	2;2;2;1;1;1;1;1;1;1;1;1	2;2;2;1;1;1;1;1;1;1;1;1	2;2;2;1;1;1;1;1;1;1;1;1	GTPase HRas;GTPase HRas, N-terminally processed;GTPase KRas;GTPase KRas, N-terminally processed;GTPase NRas	Hras;Kras;Nras	tr|C0H5X4|C0H5X4_MOUSE GTPase HRas OS=Mus musculus OX=10090 GN=Hras PE=2 SV=1;sp|Q61411|RASH_MOUSE GTPase HRas OS=Mus musculus OX=10090 GN=Hras PE=1 SV=2;sp|P32883|RASK_MOUSE GTPase KRas OS=Mus musculus OX=10090 GN=Kras PE=1 SV=1;tr|B2KGV5|B2KGV5_MOUSE GTP	12	2	2	2	1	1	1	2	1	1	1	2	1	1	1	2	21.8	21.8	21.8	13.092	119	119;189;189;34;40;46;74;75;150;183;189;189	0	6.0489	By MS/MS	By MS/MS	By MS/MS	By MS/MS	0.74456	0.95604	23.129	5	0	Leave out requantified	NaN	NaN	NaN	0.75604	NaN	NaN	NaN	0.91874
CON__A2I7N3;CON__REFSEQ:XP_001252647	CON__A2I7N3;CON__REFSEQ:XP_001252647	5;3	5;3	4;2			;	2	5	5	4	3	4	3	3	3	4	3	3	2	3	3	2	8.6	8.6	7	46.941	417	417;417	0	7.1099	By MS/MS	By MS/MS	By MS/MS	By MS/MS	0.1494	0.21131	69.725	5	5	Median	NaN	0.12188	NaN	NaN	NaN	0.21131	NaN	NaN
CON__P01030;CON__ENSEMBL:ENSBTAP00000007350	CON__P01030;CON__ENSEMBL:ENSBTAP00000007350	1;1	1;1	1;1			;	2	1	1	1	0	0	1	1	0	0	1	1	0	0	1	1	0.6	0.6	0.6	192.79	1741	1741;1742	0.0025329	2.0863			By MS/MS	By MS/MS	NaN	NaN	NaN	0	0	Median	NaN	NaN	NaN	NaN	NaN	NaN	NaN	NaN
CON__ENSEMBL:ENSBTAP00000018229;CON__Q3MHN5;P21614	CON__ENSEMBL:ENSBTAP00000018229;CON__Q3MHN5	15;14;1	15;14;1	15;14;1			;	3	15	15	15	10	11	5	10	10	11	5	10	10	11	5	10	42.3	42.3	42.3	53.661	475	475;474;476	0	54.542	By MS/MS	By MS/MS	By MS/MS	By MS/MS	0.16789	0.23217	88.334	16	16	Median	0.116	0.21617	0.21473	0.14301	0.16289	0.31493	0.25955	0.18474
CON__ENSEMBL:ENSBTAP00000018574	CON__ENSEMBL:ENSBTAP00000018574	2	2	2				1	2	2	2	2	0	0	1	2	0	0	1	2	0	0	1	4.4	4.4	4.4	55.207	496	496	0.0043796	1.8318	By MS/MS			By MS/MS	NaN	NaN	NaN	0	0	Median	NaN	NaN	NaN	NaN	NaN	NaN	NaN	NaN
CON__ENSEMBL:ENSBTAP00000024146;Q6GQT1	CON__ENSEMBL:ENSBTAP00000024146	43;2	43;2	43;2				2	43	43	43	30	29	26	26	30	29	26	26	30	29	26	26	37.9	37.9	37.9	164.34	1477	1477;1474	0	193.83	By MS/MS	By MS/MS	By MS/MS	By MS/MS	0.095285	0.13623	130.49	71	71	Median	0.10294	0.098319	0.10287	0.044793	0.14493	0.15703	0.13441	0.05503
CON__ENSEMBL:ENSBTAP00000032840	CON__ENSEMBL:ENSBTAP00000032840	5	5	4				1	5	5	4	3	2	1	3	3	2	1	3	2	1	0	2	7.3	7.3	5.8	92.273	825	825	0	10.413	By MS/MS	By MS/MS	By MS/MS	By MS/MS	0.21216	0.28069	65.706	6	6	Median	0.15402	NaN	NaN	0.42612	0.21182	NaN	NaN	0.51808
CON__ENSEMBL:ENSBTAP00000034412	CON__ENSEMBL:ENSBTAP00000034412	1	1	1				1	1	1	1	0	0	1	0	0	0	1	0	0	0	1	0	6.5	6.5	6.5	22.336	199	199	0.0020683	2.2671			By MS/MS		NaN	NaN	NaN	0	0	Median	NaN	NaN	NaN	NaN	NaN	NaN	NaN	NaN
CON__ENSEMBL:ENSBTAP00000038329	CON__ENSEMBL:ENSBTAP00000038329	1	1	1				1	1	1	1	1	1	1	1	1	1	1	1	1	1	1	1	15	15	15	8.5787	80	80	0	9.1691	By MS/MS	By MS/MS	By MS/MS	By MS/MS	0.045877	0.070734	201.48	2	2	Median	NaN	NaN	NaN	NaN	NaN	NaN	NaN	NaN
CON__P00761	CON__P00761	8	8	8				1	8	8	8	6	5	5	6	6	5	5	6	6	5	5	6	52.4	52.4	52.4	24.409	231	231	0	103.75	By MS/MS	By MS/MS	By MS/MS	By MS/MS	0.030023	0.043414	118.52	20	20	Median	0.022	0.034858	0.082685	0.021152	0.030647	0.059133	0.091943	0.02648
CON__P00978	CON__P00978	4	4	4				1	4	4	4	3	3	2	3	3	3	2	3	3	3	2	3	13.6	13.6	13.6	39.234	352	352	0	12.549	By MS/MS	By MS/MS	By MS/MS	By MS/MS	0.055102	0.089749	123.02	2	2	Median	NaN	NaN	NaN	NaN	NaN	NaN	NaN	NaN
CON__Q2KJ62;CON__P01044-1;CON__P01045-1	CON__Q2KJ62;CON__P01044-1;CON__P01045-1	6;6;5	6;6;5	6;6;5			;;	3	6	6	6	4	2	3	6	4	2	3	6	4	2	3	6	12.2	12.2	12.2	68.964	621	621;621;619	0	18.451	By MS/MS	By MS/MS	By MS/MS	By MS/MS	0.27178	0.32402	77.438	4	4	Median	NaN	NaN	NaN	0.314	NaN	NaN	NaN	0.40136
CON__P01966;Q91VB8;P01942	CON__P01966	7;1;1	7;1;1	7;1;1				3	7	7	7	3	5	4	6	3	5	4	6	3	5	4	6	63.4	63.4	63.4	15.184	142	142;142;142	0	18.298	By MS/MS	By MS/MS	By MS/MS	By MS/MS	0.072023	0.10204	105.4	16	16	Median	0.069279	0.097716	0.11501	0.036688	0.096745	0.16407	0.14591	0.045103
CON__P02769;CON__P02768-1	CON__P02769	46;5	46;5	45;5				2	46	46	45	44	44	45	44	44	44	45	44	43	43	44	43	71	71	71	69.293	607	607;609	0	323.31	By MS/MS	By MS/MS	By MS/MS	By MS/MS	0.03247	0.037319	128.75	187	179	Leave out requantified	0.010572	0.0091933	0.020249	0.032747	0.014147	0.012564	0.022599	0.039827
CON__P06868	CON__P06868	1	1	1				1	1	1	1	1	1	1	1	1	1	1	1	1	1	1	1	1.1	1.1	1.1	91.215	812	812	0.0075579	1.6279	By MS/MS	By MS/MS	By MS/MS	By MS/MS	0.037374	0.053371	45.129	3	3	Median	NaN	NaN	NaN	NaN	NaN	NaN	NaN	NaN
CON__P12763	CON__P12763	10	10	10				1	10	10	10	10	9	8	9	10	9	8	9	10	9	8	9	39	39	39	38.418	359	359	0	175.42	By MS/MS	By MS/MS	By MS/MS	By MS/MS	0.0063569	0.008352	187.53	35	35	Median	0.0054237	0.0035613	0.0083329	0.0074213	0.0074582	0.004998	0.011473	0.010506
CON__P15497;Q00623	CON__P15497	13;1	13;1	13;1				2	13	13	13	8	8	7	7	8	8	7	7	8	8	7	7	50.2	50.2	50.2	30.276	265	265;264	0	35.835	By MS/MS	By MS/MS	By MS/MS	By MS/MS	0.07295	0.099143	113.83	24	22	Median	0.15378	0.034806	0.10329	0.056644	0.19065	0.04915	0.11834	0.080185
CON__P15636	CON__P15636	13	13	13				1	13	13	13	11	12	11	10	11	12	11	10	11	12	11	10	19.9	19.9	19.9	68.124	653	653	0	256.56	By MS/MS	By MS/MS	By MS/MS	By MS/MS	0.021067	0.029491	176.58	45	45	Median	0.02168	0.020135	0.025857	0.012773	0.026839	0.033017	0.033972	0.015644
CON__P34955	CON__P34955	17	17	17				1	17	17	17	15	13	14	15	15	13	14	15	15	13	14	15	35.8	35.8	35.8	46.103	416	416	0	91.644	By MS/MS	By MS/MS	By MS/MS	By MS/MS	0.01877	0.02533	170.24	46	46	Median	0.010379	0.032537	0.020078	0.014048	0.014548	0.047082	0.030648	0.017251
CON__Q29443;CON__Q0IIK2	CON__Q29443;CON__Q0IIK2	25;25	25;25	24;24			;	2	25	25	24	15	22	17	11	15	22	17	11	14	21	16	10	47.6	47.6	46.3	75.829	685	685;704	0	141.66	By MS/MS	By MS/MS	By MS/MS	By MS/MS	0.1394	0.19619	152.71	52	52	Median	0.13538	0.13916	0.20347	0.097538	0.19619	0.20422	0.26145	0.12287
CON__Q0V8M9;A0A2I3BRQ3;Q61704	CON__Q0V8M9;A0A2I3BRQ3;Q61704	2;1;1	2;1;1	2;1;1	Inter-alpha-trypsin inhibitor heavy chain H3	Itih3	;tr|A0A2I3BRQ3|A0A2I3BRQ3_MOUSE Inter-alpha-trypsin inhibitor heavy chain H3 OS=Mus musculus OX=10090 GN=Itih3 PE=1 SV=1;sp|Q61704|ITIH3_MOUSE Inter-alpha-trypsin inhibitor heavy chain H3 OS=Mus musculus OX=10090 GN=Itih3 PE=1 SV=3	3	2	2	2	1	2	1	1	1	2	1	1	1	2	1	1	2.2	2.2	2.2	99.536	891	891;699;889	0	2.9874	By MS/MS	By MS/MS	By MS/MS	By MS/MS	0.19605	0.28925	10.135	2	2	Median	NaN	NaN	NaN	NaN	NaN	NaN	NaN	NaN
CON__Q2KJF1	CON__Q2KJF1	8	8	8				1	8	8	8	4	7	3	4	4	7	3	4	4	7	3	4	23.9	23.9	23.9	53.553	503	503	0	26.905	By MS/MS	By MS/MS	By MS/MS	By MS/MS	0.061547	0.070866	159.64	8	8	Median	0.04564	0.057812	NaN	NaN	0.063578	0.068926	NaN	NaN
CON__Q2UVX4;P01027;H3BL60	CON__Q2UVX4	19;2;1	19;2;1	19;2;1				3	19	19	19	13	7	7	8	13	7	7	8	13	7	7	8	13.4	13.4	13.4	187.37	1662	1662;1663;102	0	43.462	By MS/MS	By MS/MS	By MS/MS	By MS/MS	0.46216	0.65306	152.64	24	24	Median	0.30847	0.7725	1.0516	0.3331	0.42971	1.2829	1.3374	0.40521
CON__Q3SX09;CON__P02070;A8DUK4;P02089;P02088	CON__Q3SX09	9;2;1;1;1	9;2;1;1;1	9;2;1;1;1				5	9	9	9	4	4	6	7	4	4	6	7	4	4	6	7	51.7	51.7	51.7	22.06	201	201;145;147;147;147	0	27.007	By MS/MS	By MS/MS	By MS/MS	By MS/MS	0.13119	0.15105	100.12	12	12	Median	0.09705	0.11054	0.32699	0.24274	0.13519	0.13179	0.42962	0.32653
CON__Q3SZ57	CON__Q3SZ57	24	24	24				1	24	24	24	13	16	12	18	13	16	12	18	13	16	12	18	48.7	48.7	48.7	68.587	610	610	0	83.789	By MS/MS	By MS/MS	By MS/MS	By MS/MS	0.68954	1.0749	7.1452	48	37	Leave out requantified	0.53069	0.17867	0.68282	0.32821	0.75007	0.30493	1.0461	0.40425
CON__Q3SZH5	CON__Q3SZH5	3	3	3				1	3	3	3	1	1	0	2	1	1	0	2	1	1	0	2	11.1	11.1	11.1	45.456	424	424	0	6.2068	By MS/MS	By MS/MS		By MS/MS	NaN	NaN	NaN	1	1	Median	NaN	NaN	NaN	NaN	NaN	NaN	NaN	NaN
CON__Q3SZR3	CON__Q3SZR3	9	9	9				1	9	9	9	6	7	5	6	6	7	5	6	6	7	5	6	38.6	38.6	38.6	23.182	202	202	0	34.55	By MS/MS	By MS/MS	By MS/MS	By MS/MS	0.036099	0.045751	112.17	26	26	Median	0.027351	0.037208	0.035465	0.032523	0.038661	0.052536	0.046596	0.042312
CON__Q3SZV7	CON__Q3SZV7	2	2	2				1	2	2	2	1	0	0	2	1	0	0	2	1	0	0	2	5	5	5	52.295	460	460	0	4.6405	By MS/MS			By MS/MS	0.22766	0.291	90.499	3	3	Median	NaN	NaN	NaN	0.45327	NaN	NaN	NaN	0.57939
CON__Q3T052;A0A2K6EDJ7;E9Q5L2;E9PVD2;A6X935	CON__Q3T052	7;2;2;2;2	7;2;2;2;2	7;2;2;2;2				5	7	7	7	3	5	3	1	3	5	3	1	3	5	3	1	8.1	8.1	8.1	101.51	916	916;902;925;941;942	0	15.674	By MS/MS	By MS/MS	By MS/MS	By MS/MS	0.13699	0.15539	131.93	12	12	Median	0.18117	0.11832	0.14043	NaN	0.2665	0.14106	0.15615	NaN
CON__Q3Y5Z3	CON__Q3Y5Z3	3	3	3				1	3	3	3	0	2	1	1	0	2	1	1	0	2	1	1	15.4	15.4	15.4	26.133	240	240	0	4.024		By MS/MS	By MS/MS	By MS/MS	NaN	NaN	NaN	1	1	Median	NaN	NaN	NaN	NaN	NaN	NaN	NaN	NaN
CON__Q3ZBS7	CON__Q3ZBS7	3	3	3				1	3	3	3	0	3	0	0	0	3	0	0	0	3	0	0	7.2	7.2	7.2	54.099	484	484	0	6.1963		By MS/MS			0.14539	0.17334	245.97	2	2	Median	NaN	0.14539	NaN	NaN	NaN	0.17334	NaN	NaN
CON__Q58D62	CON__Q58D62	9	9	9				1	9	9	9	6	6	5	7	6	6	5	7	6	6	5	7	29.5	29.5	29.5	42.663	387	387	0	59.349	By MS/MS	By MS/MS	By MS/MS	By MS/MS	0.064783	0.088299	97.635	12	12	Median	0.062571	0.069437	0.075244	0.056902	0.088267	0.10221	0.096071	0.070455
CON__Q9TRI1;G3X977;Q61703;Q3UEG7	CON__Q9TRI1;G3X977;Q61703	6;3;3;2	6;3;3;2	6;3;3;2	Inter-alpha-trypsin inhibitor heavy chain H2	Itih2	;tr|G3X977|G3X977_MOUSE Inter-alpha trypsin inhibitor, heavy chain 2 OS=Mus musculus OX=10090 GN=Itih2 PE=1 SV=1;sp|Q61703|ITIH2_MOUSE Inter-alpha-trypsin inhibitor heavy chain H2 OS=Mus musculus OX=10090 GN=Itih2 PE=1 SV=1	4	6	6	6	4	3	2	5	4	3	2	5	4	3	2	5	9.4	9.4	9.4	106.19	946	946;950;946;452	0	18.755	By MS/MS	By MS/MS	By MS/MS	By MS/MS	0.11905	0.1476	84.283	10	9	Median	0.093247	0.18452	0.18711	0.1195	0.10138	0.25012	0.23282	0.13178
CON__Q9TT36	CON__Q9TT36	2	2	2				1	2	2	2	1	1	1	2	1	1	1	2	1	1	1	2	6.8	6.8	6.8	46.017	411	411	0	4.0137	By MS/MS	By MS/MS	By MS/MS	By MS/MS	0.32585	0.45781	26.223	5	5	Median	NaN	NaN	NaN	0.29565	NaN	NaN	NaN	0.36897
CON__Q9TTE1	CON__Q9TTE1	3	3	2				1	3	3	2	2	0	0	3	2	0	0	3	2	0	0	2	9.2	9.2	6.8	46.203	411	411	0	11.422	By MS/MS			By MS/MS	0.097982	0.13466	163.58	5	5	Median	NaN	NaN	NaN	0.075661	NaN	NaN	NaN	0.099834
D3Z4M2;D3YTM0;D3Z0Z2;Q924Z4	D3Z4M2;D3YTM0;D3Z0Z2;Q924Z4	1;1;1;1	1;1;1;1	1;1;1;1	Ceramide synthase 2	Cers2	tr|D3Z4M2|D3Z4M2_MOUSE Ceramide synthase 2 (Fragment) OS=Mus musculus OX=10090 GN=Cers2 PE=1 SV=1;tr|D3YTM0|D3YTM0_MOUSE Ceramide synthase 2 (Fragment) OS=Mus musculus OX=10090 GN=Cers2 PE=1 SV=1;tr|D3Z0Z2|D3Z0Z2_MOUSE Ceramide synthase 2 (Fragment) OS=Mus	4	1	1	1	0	0	0	1	0	0	0	1	0	0	0	1	6.9	6.9	6.9	15.505	130	130;220;245;380	0.0057776	1.7474				By MS/MS	NaN	NaN	NaN	1	1	Median	NaN	NaN	NaN	NaN	NaN	NaN	NaN	NaN
D3YTP8;Q9CY46;Q9QXA5;A0A1B0GQZ9;A0A1B0GRR9	D3YTP8;Q9CY46;Q9QXA5;A0A1B0GQZ9;A0A1B0GRR9	2;2;2;1;1	2;2;2;1;1	2;2;2;1;1	U6 snRNA-associated Sm-like protein LSm4	Lsm4	tr|D3YTP8|D3YTP8_MOUSE U6 snRNA-associated Sm-like protein LSm4 (Fragment) OS=Mus musculus OX=10090 GN=Lsm4 PE=1 SV=8;tr|Q9CY46|Q9CY46_MOUSE LSM4 homolog, U6 small nuclear RNA associated (S. cerevisiae), isoform CRA_b OS=Mus musculus OX=10090 GN=Lsm4 PE=1	5	2	2	2	0	1	1	0	0	1	1	0	0	1	1	0	28.1	28.1	28.1	11.072	96	96;138;137;103;105	0.0010582	2.4547		By MS/MS	By MS/MS		NaN	NaN	NaN	1	1	Median	NaN	NaN	NaN	NaN	NaN	NaN	NaN	NaN
D3YTQ3;F6VQH5;Q9Z130	D3YTQ3;F6VQH5;Q9Z130	7;6;6	6;5;5	6;5;5	Heterogeneous nuclear ribonucleoprotein D-like	Hnrnpdl	tr|D3YTQ3|D3YTQ3_MOUSE Heterogeneous nuclear ribonucleoprotein D-like OS=Mus musculus OX=10090 GN=Hnrnpdl PE=1 SV=1;tr|F6VQH5|F6VQH5_MOUSE Heterogeneous nuclear ribonucleoprotein D-like (Fragment) OS=Mus musculus OX=10090 GN=Hnrnpdl PE=1 SV=1;sp|Q9Z130|HNR	3	7	6	6	6	7	6	4	5	6	5	3	5	6	5	3	16.4	14.5	14.5	46.27	420	420;323;301	0	22.227	By MS/MS	By MS/MS	By MS/MS	By MS/MS	0.88889	1.2758	16.916	18	3	Leave out requantified	0.90031	0.76269	0.9356	1.0213	1.2707	1.2747	1.3591	1.2572
D3YWT0;D3Z569;D3YTS1;Q9R0P6	D3YWT0;D3Z569;D3YTS1;Q9R0P6	1;1;1;1	1;1;1;1	1;1;1;1	Signal peptidase complex catalytic subunit SEC11;Signal peptidase complex catalytic subunit SEC11A	Sec11a	tr|D3YWT0|D3YWT0_MOUSE Signal peptidase complex catalytic subunit SEC11 OS=Mus musculus OX=10090 GN=Sec11a PE=1 SV=1;tr|D3Z569|D3Z569_MOUSE Signal peptidase complex catalytic subunit SEC11 OS=Mus musculus OX=10090 GN=Sec11a PE=1 SV=1;tr|D3YTS1|D3YTS1_MOUSE	4	1	1	1	0	1	1	0	0	1	1	0	0	1	1	0	7.1	7.1	7.1	19.569	170	170;190;247;179	0.001056	2.4424		By MS/MS	By MS/MS		NaN	NaN	NaN	0	0	Median	NaN	NaN	NaN	NaN	NaN	NaN	NaN	NaN
D3YU12;Q8K2T1	D3YU12;Q8K2T1	1;1	1;1	1;1	NmrA-like family domain-containing protein 1	Nmral1	tr|D3YU12|D3YU12_MOUSE NmrA-like family domain-containing protein 1 OS=Mus musculus OX=10090 GN=Nmral1 PE=1 SV=1;sp|Q8K2T1|NMRL1_MOUSE NmrA-like family domain-containing protein 1 OS=Mus musculus OX=10090 GN=Nmral1 PE=1 SV=1	2	1	1	1	0	0	1	0	0	0	1	0	0	0	1	0	4.7	4.7	4.7	33.081	299	299;309	0	3.335			By MS/MS		NaN	NaN	NaN	1	1	Median	NaN	NaN	NaN	NaN	NaN	NaN	NaN	NaN
D3YU17;Q8VCM8	D3YU17;Q8VCM8	4;4	4;4	4;4	Nicalin	Ncln	tr|D3YU17|D3YU17_MOUSE Nicalin OS=Mus musculus OX=10090 GN=Ncln PE=1 SV=1;sp|Q8VCM8|NCLN_MOUSE Nicalin OS=Mus musculus OX=10090 GN=Ncln PE=1 SV=2	2	4	4	4	1	1	2	2	1	1	2	2	1	1	2	2	8.4	8.4	8.4	62.779	562	562;563	0	5.4821	By MS/MS	By MS/MS	By MS/MS	By MS/MS	0.034869	0.041571	2.4003	2	2	Median	NaN	NaN	NaN	NaN	NaN	NaN	NaN	NaN
D3YU22;Q3UH68;D3YU59;D3Z589;D3YV55;F6X3N8	D3YU22;Q3UH68;D3YU59;D3Z589	3;3;2;2;1;1	3;3;2;2;1;1	3;3;2;2;1;1	LIM and calponin homology domains-containing protein 1	Limch1	tr|D3YU22|D3YU22_MOUSE LIM and calponin homology domains-containing protein 1 OS=Mus musculus OX=10090 GN=Limch1 PE=1 SV=1;sp|Q3UH68|LIMC1_MOUSE LIM and calponin homology domains-containing protein 1 OS=Mus musculus OX=10090 GN=Limch1 PE=1 SV=2;tr|D3YU59|D	6	3	3	3	1	3	1	1	1	3	1	1	1	3	1	1	4.1	4.1	4.1	119.57	1068	1068;1057;774;898;237;268	0	3.5845	By MS/MS	By MS/MS	By MS/MS	By MS/MS	0.068859	0.074992	148.95	5	5	Median	NaN	0.40194	NaN	NaN	NaN	0.57022	NaN	NaN
D3YU80;K4DI65;P60824	D3YU80;K4DI65;P60824	1;1;1	1;1;1	1;1;1	Cold-inducible RNA-binding protein	Cirbp	tr|D3YU80|D3YU80_MOUSE Cold-inducible RNA-binding protein (Fragment) OS=Mus musculus OX=10090 GN=Cirbp PE=1 SV=1;tr|K4DI65|K4DI65_MOUSE Cold inducible RNA binding protein, isoform CRA_a OS=Mus musculus OX=10090 GN=Cirbp PE=1 SV=1;sp|P60824|CIRBP_MOUSE Cold	3	1	1	1	1	1	1	1	1	1	1	1	1	1	1	1	13	13	13	11.782	108	108;168;172	0.0025615	2.1676	By MS/MS	By MS/MS	By MS/MS	By MS/MS	0.64648	0.859	16.136	4	3	Median	NaN	NaN	NaN	NaN	NaN	NaN	NaN	NaN
D3Z1U9;D3YUM1;Q91YT0;D3YXX5;D3Z0K1	D3Z1U9;D3YUM1;Q91YT0;D3YXX5;D3Z0K1	2;2;2;1;1	2;2;2;1;1	2;2;2;1;1	NADH dehydrogenase [ubiquinone] flavoprotein 1, mitochondrial	Ndufv1	tr|D3Z1U9|D3Z1U9_MOUSE NADH dehydrogenase [ubiquinone] flavoprotein 1, mitochondrial OS=Mus musculus OX=10090 GN=Ndufv1 PE=1 SV=1;tr|D3YUM1|D3YUM1_MOUSE NADH dehydrogenase [ubiquinone] flavoprotein 1, mitochondrial OS=Mus musculus OX=10090 GN=Ndufv1 PE=1 S	5	2	2	2	0	0	2	0	0	0	2	0	0	0	2	0	9.9	9.9	9.9	41.833	385	385;455;464;115;146	0.0010787	2.6429			By MS/MS		0.33257	0.36981	51.759	2	2	Median	NaN	NaN	0.33257	NaN	NaN	NaN	0.36981	NaN
D3YUV1;Q99J45	D3YUV1;Q99J45	1;1	1;1	1;1	Nuclear receptor-binding protein	Nrbp1	tr|D3YUV1|D3YUV1_MOUSE Nuclear receptor-binding protein OS=Mus musculus OX=10090 GN=Nrbp1 PE=1 SV=1;sp|Q99J45|NRBP_MOUSE Nuclear receptor-binding protein OS=Mus musculus OX=10090 GN=Nrbp1 PE=1 SV=1	2	1	1	1	1	1	1	1	1	1	1	1	1	1	1	1	2.8	2.8	2.8	60.85	543	543;535	0.0057831	1.7519	By MS/MS	By MS/MS	By MS/MS	By MS/MS	0.82948	0.99138	6.9096	4	0	Linear	NaN	NaN	NaN	NaN	NaN	NaN	NaN	NaN
D3YV69;P35279;A0A1L1SRS6;P61294	D3YV69;P35279	3;3;1;1	3;3;1;1	3;3;1;1	Ras-related protein Rab-6A	Rab6a	tr|D3YV69|D3YV69_MOUSE Ras-related protein Rab-6A OS=Mus musculus OX=10090 GN=Rab6a PE=1 SV=1;sp|P35279|RAB6A_MOUSE Ras-related protein Rab-6A OS=Mus musculus OX=10090 GN=Rab6a PE=1 SV=4	4	3	3	3	0	2	2	0	0	2	2	0	0	2	2	0	20.6	20.6	20.6	19.961	175	175;208;80;208	0	7.6416		By MS/MS	By MS/MS		3.8249	4.2735	91.863	3	1	Plateau	NaN	NaN	1.9278	NaN	NaN	NaN	2.4273	NaN
D3YV77;Q3UEB4;Q9R008;A0A0G2JDI0;A0A0G2JEG0;A0A0G2JFX8	D3YV77;Q3UEB4;Q9R008;A0A0G2JDI0	3;3;3;2;1;1	3;3;3;2;1;1	3;3;3;2;1;1	Mevalonate kinase	Mvk	tr|D3YV77|D3YV77_MOUSE Mevalonate kinase (Fragment) OS=Mus musculus OX=10090 GN=Mvk PE=1 SV=8;tr|Q3UEB4|Q3UEB4_MOUSE Mevalonate kinase OS=Mus musculus OX=10090 GN=Mvk PE=1 SV=1;sp|Q9R008|KIME_MOUSE Mevalonate kinase OS=Mus musculus OX=10090 GN=Mvk PE=1 SV=	6	3	3	3	1	1	2	2	1	1	2	2	1	1	2	2	11.7	11.7	11.7	28.621	266	266;407;395;136;226;238	0	3.5058	By MS/MS	By matching	By matching	By MS/MS	0.60227	0.86647	9.1754	5	0	Leave out requantified	NaN	NaN	0.58796	NaN	NaN	NaN	0.84542	NaN
D3YVH4;E9Q4Q2;D3YZC9;D3YZD0;Q64213;D6RDB7;F8WHF9	D3YVH4;E9Q4Q2;D3YZC9;D3YZD0;Q64213	3;3;3;3;3;1;1	3;3;3;3;3;1;1	3;3;3;3;3;1;1	Splicing factor 1	Sf1	tr|D3YVH4|D3YVH4_MOUSE Splicing factor 1 (Fragment) OS=Mus musculus OX=10090 GN=Sf1 PE=1 SV=1;tr|E9Q4Q2|E9Q4Q2_MOUSE Splicing factor 1 OS=Mus musculus OX=10090 GN=Sf1 PE=1 SV=1;tr|D3YZC9|D3YZC9_MOUSE Splicing factor 1 OS=Mus musculus OX=10090 GN=Sf1 PE=1 S	7	3	3	3	2	2	3	2	2	2	3	2	2	2	3	2	19.9	19.9	19.9	30.125	267	267;548;571;638;653;84;110	0	6.3747	By MS/MS	By MS/MS	By MS/MS	By MS/MS	0.095316	0.10975	76.048	6	6	Median	NaN	0.089666	0.16702	NaN	NaN	0.1069	0.18572	NaN
D3YVI6;D3Z440;Q9CZ04;D3Z0S0	D3YVI6;D3Z440;Q9CZ04;D3Z0S0	2;2;2;1	2;2;2;1	2;2;2;1	COP9 signalosome complex subunit 7a	Cops7a	tr|D3YVI6|D3YVI6_MOUSE COP9 signalosome complex subunit 7a (Fragment) OS=Mus musculus OX=10090 GN=Cops7a PE=1 SV=1;tr|D3Z440|D3Z440_MOUSE COP9 signalosome complex subunit 7a (Fragment) OS=Mus musculus OX=10090 GN=Cops7a PE=1 SV=8;sp|Q9CZ04|CSN7A_MOUSE COP9	4	2	2	2	2	2	2	2	2	2	2	2	2	2	2	2	13.6	13.6	13.6	19.532	176	176;226;275;79	0	33.103	By MS/MS	By MS/MS	By MS/MS	By MS/MS	0.6468	0.9241	7.2281	8	0	Leave out requantified	0.66674	0.56194	0.62922	0.74819	0.93856	0.95677	0.90987	0.90507
D3Z121;D3YVK1;P15105	D3Z121;D3YVK1;P15105	1;1;1	1;1;1	1;1;1	Glutamine synthetase	Glul	tr|D3Z121|D3Z121_MOUSE Glutamine synthetase (Fragment) OS=Mus musculus OX=10090 GN=Glul PE=1 SV=2;tr|D3YVK1|D3YVK1_MOUSE Glutamine synthetase (Fragment) OS=Mus musculus OX=10090 GN=Glul PE=1 SV=8;sp|P15105|GLNA_MOUSE Glutamine synthetase OS=Mus musculus OX	3	1	1	1	1	1	1	0	1	1	1	0	1	1	1	0	8.9	8.9	8.9	12.788	112	112;198;373	0	3.8385	By MS/MS	By MS/MS	By MS/MS		0.40092	0.68635	183.93	3	3	Median	NaN	NaN	NaN	NaN	NaN	NaN	NaN	NaN
D3Z3E8;E9PW39;D3YVL0;P23249	D3Z3E8;E9PW39;D3YVL0;P23249	1;1;1;1	1;1;1;1	1;1;1;1	Putative helicase MOV-10	Mov10	tr|D3Z3E8|D3Z3E8_MOUSE Putative helicase MOV-10 OS=Mus musculus OX=10090 GN=Mov10 PE=1 SV=1;tr|E9PW39|E9PW39_MOUSE Putative helicase MOV-10 OS=Mus musculus OX=10090 GN=Mov10 PE=1 SV=1;tr|D3YVL0|D3YVL0_MOUSE Putative helicase MOV-10 OS=Mus musculus OX=10090	4	1	1	1	1	0	0	1	1	0	0	1	1	0	0	1	1.7	1.7	1.7	113.6	1004	1004;1077;1077;1004	0.0020704	2.2695	By matching			By MS/MS	0.55056	0.71562	5.15	2	0	Median	NaN	NaN	NaN	NaN	NaN	NaN	NaN	NaN
D3YWA4;F8WI88;Q6P8I4;Q3TM89	D3YWA4;F8WI88;Q6P8I4;Q3TM89	2;2;2;1	2;2;2;1	2;2;2;1	PEST proteolytic signal-containing nuclear protein	Pcnp	tr|D3YWA4|D3YWA4_MOUSE PEST proteolytic signal-containing nuclear protein OS=Mus musculus OX=10090 GN=Pcnp PE=1 SV=1;tr|F8WI88|F8WI88_MOUSE PEST proteolytic signal-containing nuclear protein OS=Mus musculus OX=10090 GN=Pcnp PE=1 SV=1;sp|Q6P8I4|PCNP_MOUSE P	4	2	2	2	1	0	2	0	1	0	2	0	1	0	2	0	18	18	18	12.096	111	111;189;178;147	0	4.2589	By matching		By MS/MS		0.4084	0.56531	75.26	3	1	Median	NaN	NaN	0.32206	NaN	NaN	NaN	0.40516	NaN
D3YWT1;D3Z3N4;D3Z6Y3	D3YWT1;D3Z3N4	8;8;3	6;6;1	6;6;1		Hnrnph3	tr|D3YWT1|D3YWT1_MOUSE Heterogeneous nuclear ribonucleoprotein H3 OS=Mus musculus OX=10090 GN=Hnrnph3 PE=1 SV=1;tr|D3Z3N4|D3Z3N4_MOUSE Heterogeneous nuclear ribonucleoprotein H3 OS=Mus musculus OX=10090 GN=Hnrnph3 PE=1 SV=1	3	8	6	6	3	3	5	5	3	1	4	4	3	1	4	4	25.7	22.7	22.7	35.181	331	331;346;71	0	16.368	By MS/MS	By MS/MS	By MS/MS	By MS/MS	0.092412	0.11018	114.62	9	9	Median	0.21376	NaN	0.059373	0.25815	0.29778	NaN	0.066021	0.32997
F6XUR8;S4R1B3;D3YX27;Q9JIY5;D3YX28;S4R1A8;F6TCV0	F6XUR8;S4R1B3;D3YX27;Q9JIY5;D3YX28	3;3;3;3;2;1;1	3;3;3;3;2;1;1	3;3;3;3;2;1;1	Serine protease HTRA2, mitochondrial	Htra2	tr|F6XUR8|F6XUR8_MOUSE Serine protease HTRA2, mitochondrial (Fragment) OS=Mus musculus OX=10090 GN=Htra2 PE=1 SV=1;tr|S4R1B3|S4R1B3_MOUSE Serine protease HTRA2, mitochondrial OS=Mus musculus OX=10090 GN=Htra2 PE=1 SV=1;tr|D3YX27|D3YX27_MOUSE Serine proteas	7	3	3	3	1	1	0	1	1	1	0	1	1	1	0	1	24.9	24.9	24.9	26.656	249	249;328;426;458;361;137;294	0	4.1553	By MS/MS	By MS/MS		By MS/MS	NaN	NaN	NaN	1	1	Median	NaN	NaN	NaN	NaN	NaN	NaN	NaN	NaN
D3YX34;E9Q586;E9Q3M3;O08788	D3YX34;E9Q586;E9Q3M3;O08788	9;9;8;8	9;9;8;8	9;9;8;8	Dynactin subunit 1	Dctn1	tr|D3YX34|D3YX34_MOUSE Dynactin subunit 1 OS=Mus musculus OX=10090 GN=Dctn1 PE=1 SV=1;tr|E9Q586|E9Q586_MOUSE Dynactin subunit 1 OS=Mus musculus OX=10090 GN=Dctn1 PE=1 SV=1;tr|E9Q3M3|E9Q3M3_MOUSE Dynactin subunit 1 OS=Mus musculus OX=10090 GN=Dctn1 PE=1 SV=	4	9	9	9	4	3	3	3	4	3	3	3	4	3	3	3	11.4	11.4	11.4	126.82	1142	1142;1239;1264;1281	0	22.979	By MS/MS	By MS/MS	By MS/MS	By MS/MS	0.69796	0.89971	83.637	11	6	Median	0.69796	1.7612	0.26926	0.73906	0.95874	2.0997	0.29941	0.89971
D3YX62;O70252;D3YXN4	D3YX62;O70252	4;4;1	4;4;1	4;4;1	Heme oxygenase 2	Hmox2	tr|D3YX62|D3YX62_MOUSE Heme oxygenase 2 (Fragment) OS=Mus musculus OX=10090 GN=Hmox2 PE=1 SV=1;sp|O70252|HMOX2_MOUSE Heme oxygenase 2 OS=Mus musculus OX=10090 GN=Hmox2 PE=1 SV=1	3	4	4	4	3	2	2	2	3	2	2	2	3	2	2	2	26.3	26.3	26.3	26.385	228	228;315;93	0	13.11	By MS/MS	By MS/MS	By MS/MS	By MS/MS	0.7114	1.0587	37.607	7	2	Leave out requantified	0.66621	0.70857	NaN	0.50012	0.82875	1.174	NaN	0.62108
D3YX76;P15626;D3YVP6;E9QAC8;D3YVP5;Q80W21;D3YZ29;D3YVP9;G5E8M7;O35660	D3YX76;P15626;D3YVP6;E9QAC8;D3YVP5;Q80W21;D3YZ29	5;5;4;4;4;4;3;2;2;2	2;2;1;1;1;1;1;1;1;1	1;1;0;0;0;0;0;0;0;0	Glutathione S-transferase Mu 2;Glutathione S-transferase Mu 7	Gstm2;Gstm7	tr|D3YX76|D3YX76_MOUSE Glutathione S-transferase OS=Mus musculus OX=10090 GN=Gstm2 PE=1 SV=1;sp|P15626|GSTM2_MOUSE Glutathione S-transferase Mu 2 OS=Mus musculus OX=10090 GN=Gstm2 PE=1 SV=2;tr|D3YVP6|D3YVP6_MOUSE Glutathione S-transferase Mu 7 OS=Mus muscu	10	5	2	1	4	2	5	2	1	0	2	1	1	0	1	1	31	12.5	6.5	21.669	184	184;218;181;193;214;218;119;154;232;218	0.0015576	2.2888	By matching	By matching	By MS/MS	By matching	0.33159	0.44072	51.982	4	1	Linear	NaN	NaN	0.2176	NaN	NaN	NaN	0.28372	NaN
E9PUB7;D3YX87;Q2YDW2	E9PUB7;D3YX87;Q2YDW2	4;4;4	4;4;4	4;4;4	Protein misato homolog 1	Msto1	tr|E9PUB7|E9PUB7_MOUSE Protein misato homolog 1 OS=Mus musculus OX=10090 GN=Msto1 PE=1 SV=1;tr|D3YX87|D3YX87_MOUSE Protein misato homolog 1 OS=Mus musculus OX=10090 GN=Msto1 PE=1 SV=1;sp|Q2YDW2|MSTO1_MOUSE Protein misato homolog 1 OS=Mus musculus OX=10090	3	4	4	4	2	1	2	3	2	1	2	3	2	1	2	3	12.6	12.6	12.6	61.207	556	556;586;556	0	9.7277	By MS/MS	By MS/MS	By MS/MS	By MS/MS	0.10168	0.12997	14.484	3	3	Median	NaN	NaN	NaN	0.099267	NaN	NaN	NaN	0.12689
D3YXC2;Q791T5	D3YXC2;Q791T5	1;1	1;1	1;1	Mitochondrial carrier homolog 1	Mtch1	tr|D3YXC2|D3YXC2_MOUSE Mitochondrial carrier homolog 1 (Fragment) OS=Mus musculus OX=10090 GN=Mtch1 PE=1 SV=1;sp|Q791T5|MTCH1_MOUSE Mitochondrial carrier homolog 1 OS=Mus musculus OX=10090 GN=Mtch1 PE=1 SV=1	2	1	1	1	0	0	0	1	0	0	0	1	0	0	0	1	10.2	10.2	10.2	12.203	108	108;389	1	-2				By MS/MS	NaN	NaN	NaN	1	1	Median	NaN	NaN	NaN	NaN	NaN	NaN	NaN	NaN
S4R1M2;D3YXK2;F6XJ79;F6Z0Y5;Q80YR5	S4R1M2;D3YXK2	5;5;1;1;1	5;5;1;1;1	5;5;1;1;1	Scaffold attachment factor B1	Safb	tr|S4R1M2|S4R1M2_MOUSE Scaffold attachment factor B1 OS=Mus musculus OX=10090 GN=Safb PE=1 SV=1;sp|D3YXK2|SAFB1_MOUSE Scaffold attachment factor B1 OS=Mus musculus OX=10090 GN=Safb PE=1 SV=2	5	5	5	5	1	3	2	1	1	3	2	1	1	3	2	1	4.7	4.7	4.7	105.32	939	939;937;248;249;991	0	10.394	By MS/MS	By MS/MS	By MS/MS	By MS/MS	0.69109	1.0797	73.011	4	3	Median	NaN	0.38518	0.79033	NaN	NaN	0.52211	1.1477	NaN
D3YXP6;Q9D1G2	D3YXP6;Q9D1G2	5;5	5;5	5;5	Phosphomevalonate kinase	Pmvk	tr|D3YXP6|D3YXP6_MOUSE Phosphomevalonate kinase OS=Mus musculus OX=10090 GN=Pmvk PE=1 SV=1;sp|Q9D1G2|PMVK_MOUSE Phosphomevalonate kinase OS=Mus musculus OX=10090 GN=Pmvk PE=1 SV=3	2	5	5	5	3	4	3	3	3	4	3	3	3	4	3	3	34.8	34.8	34.8	17.942	158	158;192	0	9.7265	By MS/MS	By MS/MS	By MS/MS	By MS/MS	0.67472	0.99678	67.101	9	5	Median	0.67472	0.54084	0.42654	1.3962	0.92916	0.76541	0.53606	1.7514
D3YXZ3;Q91YS4;O88448;D3Z5Y7;Q5UE59;E9Q7C9;Q7TNF4;Q8CD76;O88447;Q9DBS5	D3YXZ3;Q91YS4;O88448	3;3;3;1;1;1;1;1;1;1	3;3;3;1;1;1;1;1;1;1	3;3;3;1;1;1;1;1;1;1	Kinesin light chain 2	Klc2	tr|D3YXZ3|D3YXZ3_MOUSE Kinesin light chain 2 OS=Mus musculus OX=10090 GN=Klc2 PE=1 SV=1;tr|Q91YS4|Q91YS4_MOUSE Kinesin light chain 2 OS=Mus musculus OX=10090 GN=Klc2 PE=1 SV=1;sp|O88448|KLC2_MOUSE Kinesin light chain 2 OS=Mus musculus OX=10090 GN=Klc2 PE=1	10	3	3	3	1	1	2	1	1	1	2	1	1	1	2	1	8.4	8.4	8.4	68.176	617	617;619;599;166;542;560;608;616;541;619	0	9.8456	By MS/MS	By MS/MS	By MS/MS	By MS/MS	0.62826	0.88088	28.562	4	1	Median	NaN	NaN	0.56322	NaN	NaN	NaN	0.71106	NaN
D3YYC2;F6T9K1;G3UXH5;D3YY09;Q9D6N5	D3YYC2;F6T9K1;G3UXH5;D3YY09;Q9D6N5	1;1;1;1;1	1;1;1;1;1	1;1;1;1;1	Dr1-associated corepressor	Drap1	tr|D3YYC2|D3YYC2_MOUSE Dr1-associated corepressor OS=Mus musculus OX=10090 GN=Drap1 PE=1 SV=1;tr|F6T9K1|F6T9K1_MOUSE Dr1-associated corepressor OS=Mus musculus OX=10090 GN=Drap1 PE=1 SV=2;tr|G3UXH5|G3UXH5_MOUSE Dr1-associated corepressor OS=Mus musculus OX	5	1	1	1	1	0	1	1	1	0	1	1	1	0	1	1	6.8	6.8	6.8	17.587	162	162;182;185;212;205	0	3.4864	By MS/MS		By MS/MS	By MS/MS	0.01262	0.017495	77.515	3	3	Median	NaN	NaN	NaN	NaN	NaN	NaN	NaN	NaN
G5E8N3;D3YYC3;O88974	G5E8N3;D3YYC3;O88974	1;1;1	1;1;1	1;1;1	Histone-lysine N-methyltransferase SETDB1	Setdb1	tr|G5E8N3|G5E8N3_MOUSE Histone-lysine N-methyltransferase OS=Mus musculus OX=10090 GN=Setdb1 PE=1 SV=1;tr|D3YYC3|D3YYC3_MOUSE Histone-lysine N-methyltransferase OS=Mus musculus OX=10090 GN=Setdb1 PE=1 SV=1;sp|O88974|SETB1_MOUSE Histone-lysine N-methyltrans	3	1	1	1	0	0	0	1	0	0	0	1	0	0	0	1	0.9	0.9	0.9	144.54	1307	1307;1308;1307	0.0066319	1.6656				By MS/MS	NaN	NaN	NaN	1	1	Median	NaN	NaN	NaN	NaN	NaN	NaN	NaN	NaN
D3YYD5;D3Z645;Q9QZ88;D3YW98	D3YYD5;D3Z645;Q9QZ88;D3YW98	4;4;4;3	4;4;4;3	4;4;4;3	Vacuolar protein sorting-associated protein 29	Vps29	tr|D3YYD5|D3YYD5_MOUSE Vacuolar protein sorting-associated protein 29 (Fragment) OS=Mus musculus OX=10090 GN=Vps29 PE=1 SV=1;tr|D3Z645|D3Z645_MOUSE Vacuolar protein sorting-associated protein 29 OS=Mus musculus OX=10090 GN=Vps29 PE=1 SV=1;sp|Q9QZ88|VPS29_M	4	4	4	4	2	3	3	3	2	3	3	3	2	3	3	3	35.5	35.5	35.5	13.723	124	124;144;182;91	0	8.5136	By MS/MS	By MS/MS	By MS/MS	By MS/MS	0.87515	1.276	13.926	10	2	Leave out requantified	0.8559	0.82947	0.79633	1.0221	1.1991	1.4187	1.1665	1.2574
D6RIL0;D6RI94;D3Z3R4;F6THL5;D3YYF2;E9Q7L3;D3Z1W6;E9Q7L2;D3Z1N4;E9Q4Y5;F8VQD1;Q8BSQ9	D6RIL0;D6RI94;D3Z3R4;F6THL5;D3YYF2;E9Q7L3;D3Z1W6;E9Q7L2;D3Z1N4;E9Q4Y5;F8VQD1;Q8BSQ9	1;1;1;1;1;1;1;1;1;1;1;1	1;1;1;1;1;1;1;1;1;1;1;1	1;1;1;1;1;1;1;1;1;1;1;1	Protein polybromo-1	Pbrm1	tr|D6RIL0|D6RIL0_MOUSE Protein polybromo-1 OS=Mus musculus OX=10090 GN=Pbrm1 PE=1 SV=1;tr|D6RI94|D6RI94_MOUSE Protein polybromo-1 OS=Mus musculus OX=10090 GN=Pbrm1 PE=1 SV=1;tr|D3Z3R4|D3Z3R4_MOUSE Protein polybromo-1 (Fragment) OS=Mus musculus OX=10090 GN=	12	1	1	1	1	0	0	1	1	0	0	1	1	0	0	1	0.9	0.9	0.9	99.018	856	856;860;931;1085;1460;1582;1582;1597;1652;1689;1704;1634	0.005772	1.7393	By MS/MS			By MS/MS	0.48433	0.6463	20.474	2	2	Median	NaN	NaN	NaN	NaN	NaN	NaN	NaN	NaN
D3YYK0;Q8K4F5	D3YYK0;Q8K4F5	2;2	2;2	2;2	Alpha/beta hydrolase domain-containing protein 11	Abhd11	tr|D3YYK0|D3YYK0_MOUSE Abhydrolase domain containing 11, isoform CRA_b OS=Mus musculus OX=10090 GN=Abhd11 PE=1 SV=1;sp|Q8K4F5|ABHDB_MOUSE Protein ABHD11 OS=Mus musculus OX=10090 GN=Abhd11 PE=1 SV=1	2	2	2	2	1	2	1	1	1	2	1	1	1	2	1	1	12.3	12.3	12.3	24.881	227	227;307	0	6.9057	By MS/MS	By MS/MS	By MS/MS	By MS/MS	0.045688	0.05447	77.802	5	5	Median	NaN	0.044558	NaN	NaN	NaN	0.050769	NaN	NaN
F6VIR4;E9QM06;D3YZ08;O35144	F6VIR4;E9QM06;D3YZ08;O35144	1;1;1;1	1;1;1;1	1;1;1;1	Telomeric repeat-binding factor 2	Terf2	tr|F6VIR4|F6VIR4_MOUSE Telomeric repeat-binding factor 2 (Fragment) OS=Mus musculus OX=10090 GN=Terf2 PE=1 SV=1;tr|E9QM06|E9QM06_MOUSE Telomeric repeat-binding factor OS=Mus musculus OX=10090 GN=Terf2 PE=1 SV=1;tr|D3YZ08|D3YZ08_MOUSE Telomeric repeat-bindi	4	1	1	1	0	0	0	1	0	0	0	1	0	0	0	1	5.6	5.6	5.6	20.831	179	179;476;540;541	0.0015666	2.3489				By MS/MS	NaN	NaN	NaN	0	0	Median	NaN	NaN	NaN	NaN	NaN	NaN	NaN	NaN
D3YZ09;Q9CY66;F6SL78	D3YZ09;Q9CY66;F6SL78	2;2;1	2;2;1	2;2;1	H/ACA ribonucleoprotein complex subunit 1	Gar1	tr|D3YZ09|D3YZ09_MOUSE H/ACA ribonucleoprotein complex subunit (Fragment) OS=Mus musculus OX=10090 GN=Gar1 PE=1 SV=1;sp|Q9CY66|GAR1_MOUSE H/ACA ribonucleoprotein complex subunit 1 OS=Mus musculus OX=10090 GN=Gar1 PE=1 SV=1;tr|F6SL78|F6SL78_MOUSE H/ACA ribo	3	2	2	2	1	1	0	0	1	1	0	0	1	1	0	0	8.1	8.1	8.1	20.448	198	198;231;79	0	5.9562	By MS/MS	By MS/MS			NaN	NaN	NaN	1	1	Median	NaN	NaN	NaN	NaN	NaN	NaN	NaN	NaN
D3YZA1;D3Z7T7;E9PW20;Q9CY57	D3YZA1;D3Z7T7;E9PW20;Q9CY57	2;2;2;2	2;2;2;2	2;2;2;2	Chromatin target of PRMT1 protein	Chtop	tr|D3YZA1|D3YZA1_MOUSE Chromatin target of PRMT1 protein (Fragment) OS=Mus musculus OX=10090 GN=Chtop PE=1 SV=8;tr|D3Z7T7|D3Z7T7_MOUSE Chromatin target of PRMT1 protein (Fragment) OS=Mus musculus OX=10090 GN=Chtop PE=1 SV=1;tr|E9PW20|E9PW20_MOUSE Chromatin	4	2	2	2	1	2	1	1	1	2	1	1	1	2	1	1	23.6	23.6	23.6	13.447	123	123;195;203;249	0	22.915	By MS/MS	By MS/MS	By MS/MS	By MS/MS	0.14969	0.1935	149.07	2	2	Median	NaN	NaN	NaN	NaN	NaN	NaN	NaN	NaN
D3YZE6	D3YZE6	1	1	1		Ugt1a6a	tr|D3YZE6|D3YZE6_MOUSE UDP-glucuronosyltransferase (Fragment) OS=Mus musculus OX=10090 GN=Ugt1a6a PE=3 SV=1	1	1	1	1	0	0	1	0	0	0	1	0	0	0	1	0	7.8	7.8	7.8	18.261	166	166	1	-2			By MS/MS		NaN	NaN	NaN	1	0	Median	NaN	NaN	NaN	NaN	NaN	NaN	NaN	NaN
D3YZJ1;Q64337	D3YZJ1;Q64337	4;4	4;4	4;4	Sequestosome-1	Sqstm1	tr|D3YZJ1|D3YZJ1_MOUSE Sequestosome-1 OS=Mus musculus OX=10090 GN=Sqstm1 PE=1 SV=1;sp|Q64337|SQSTM_MOUSE Sequestosome-1 OS=Mus musculus OX=10090 GN=Sqstm1 PE=1 SV=1	2	4	4	4	3	2	2	3	3	2	2	3	3	2	2	3	19.4	19.4	19.4	41.683	382	382;442	0	11.526	By MS/MS	By MS/MS	By MS/MS	By MS/MS	0.11601	0.14438	105.15	4	4	Median	NaN	NaN	NaN	0.063102	NaN	NaN	NaN	0.080659
D3YZP9;F6SXB0	D3YZP9	3;1	3;1	3;1	Coiled-coil domain-containing protein 6	Ccdc6	sp|D3YZP9|CCDC6_MOUSE Coiled-coil domain-containing protein 6 OS=Mus musculus OX=10090 GN=Ccdc6 PE=1 SV=1	2	3	3	3	1	1	1	1	1	1	1	1	1	1	1	1	7.2	7.2	7.2	52.938	469	469;137	0	5.2808	By MS/MS	By MS/MS	By MS/MS	By MS/MS	0.11899	0.15878	78.38	4	4	Median	NaN	NaN	NaN	NaN	NaN	NaN	NaN	NaN
E9Q7G1;D3YZZ5	E9Q7G1;D3YZZ5	2;2	2;2	2;2		Tmed7	tr|E9Q7G1|E9Q7G1_MOUSE Transmembrane p24-trafficking protein 7 OS=Mus musculus OX=10090 GN=Tmed7 PE=1 SV=1;tr|D3YZZ5|D3YZZ5_MOUSE Transmembrane p24-trafficking protein 7 OS=Mus musculus OX=10090 GN=Tmed7 PE=1 SV=1	2	2	2	2	1	2	1	1	1	2	1	1	1	2	1	1	12.2	12.2	12.2	21.276	188	188;224	0	6.4804	By MS/MS	By MS/MS	By MS/MS	By matching	0.75948	1.0618	24.826	5	1	Median	NaN	0.56872	NaN	NaN	NaN	0.81012	NaN	NaN
D3Z041;P41216;D3YVF6;D3Z457	D3Z041;P41216	4;4;1;1	4;4;1;1	4;4;1;1	Long-chain-fatty-acid--CoA ligase 1	Acsl1	tr|D3Z041|D3Z041_MOUSE Long-chain-fatty-acid--CoA ligase 1 OS=Mus musculus OX=10090 GN=Acsl1 PE=1 SV=1;sp|P41216|ACSL1_MOUSE Long-chain-fatty-acid--CoA ligase 1 OS=Mus musculus OX=10090 GN=Acsl1 PE=1 SV=2	4	4	4	4	2	0	1	4	2	0	1	4	2	0	1	4	7	7	7	78.034	699	699;699;86;136	0	13.939	By MS/MS		By MS/MS	By MS/MS	0.78693	1.0319	11.336	4	2	Median	0.81208	NaN	NaN	0.77801	1.1226	NaN	NaN	0.95874
D3Z061;Q8C7R4	D3Z061;Q8C7R4	4;4	4;4	4;4	Ubiquitin-like modifier-activating enzyme 6	Uba6	tr|D3Z061|D3Z061_MOUSE Ubiquitin-like modifier-activating enzyme 6 OS=Mus musculus OX=10090 GN=Uba6 PE=1 SV=1;sp|Q8C7R4|UBA6_MOUSE Ubiquitin-like modifier-activating enzyme 6 OS=Mus musculus OX=10090 GN=Uba6 PE=1 SV=1	2	4	4	4	1	1	1	4	1	1	1	4	1	1	1	4	5	5	5	114.77	1022	1022;1053	0	12.454	By MS/MS	By MS/MS	By MS/MS	By MS/MS	0.38753	0.49535	52.955	4	3	Median	NaN	NaN	NaN	0.38753	NaN	NaN	NaN	0.49535
D3Z094;Q3TUU5	D3Z094;Q3TUU5	1;1	1;1	1;1	Testis-expressed sequence 30 protein	Tex30	tr|D3Z094|D3Z094_MOUSE Testis-expressed protein 30 (Fragment) OS=Mus musculus OX=10090 GN=Tex30 PE=1 SV=8;sp|Q3TUU5|TEX30_MOUSE Testis-expressed protein 30 OS=Mus musculus OX=10090 GN=Tex30 PE=1 SV=1	2	1	1	1	1	1	0	1	1	1	0	1	1	1	0	1	10.4	10.4	10.4	8.7419	77	77;225	0.002576	2.228	By MS/MS	By MS/MS		By MS/MS	1.25	1.359	140.39	3	3	Median	NaN	NaN	NaN	NaN	NaN	NaN	NaN	NaN
D3Z0F5;O88545	D3Z0F5;O88545	3;3	3;3	3;3	COP9 signalosome complex subunit 6	Cops6	tr|D3Z0F5|D3Z0F5_MOUSE COP9 signalosome complex subunit 6 OS=Mus musculus OX=10090 GN=Cops6 PE=1 SV=1;sp|O88545|CSN6_MOUSE COP9 signalosome complex subunit 6 OS=Mus musculus OX=10090 GN=Cops6 PE=1 SV=1	2	3	3	3	2	1	1	3	2	1	1	3	2	1	1	3	14.1	14.1	14.1	33.591	297	297;324	0	9.6614	By MS/MS	By MS/MS	By MS/MS	By MS/MS	1.0049	1.3055	47.04	7	2	Leave out requantified	0.58631	NaN	NaN	0.75526	0.83512	NaN	NaN	0.92366
D3Z0G0;Q9EQ80	D3Z0G0;Q9EQ80	2;2	2;2	2;2	NIF3-like protein 1	Nif3l1	tr|D3Z0G0|D3Z0G0_MOUSE NIF3-like protein 1 OS=Mus musculus OX=10090 GN=Nif3l1 PE=1 SV=1;sp|Q9EQ80|NIF3L_MOUSE NIF3-like protein 1 OS=Mus musculus OX=10090 GN=Nif3l1 PE=1 SV=4	2	2	2	2	0	2	1	1	0	2	1	1	0	2	1	1	7.3	7.3	7.3	36.267	329	329;376	0	3.1093		By MS/MS	By MS/MS	By MS/MS	0.12367	0.15808	56.781	3	3	Median	NaN	NaN	NaN	NaN	NaN	NaN	NaN	NaN
D6RGR3;D3Z0L3;Q3T9A5;Q8BZM1	D6RGR3;D3Z0L3;Q3T9A5;Q8BZM1	1;1;1;1	1;1;1;1	1;1;1;1	Glomulin	Glmn	tr|D6RGR3|D6RGR3_MOUSE Glomulin OS=Mus musculus OX=10090 GN=Glmn PE=1 SV=1;tr|D3Z0L3|D3Z0L3_MOUSE Glomulin (Fragment) OS=Mus musculus OX=10090 GN=Glmn PE=1 SV=1;tr|Q3T9A5|Q3T9A5_MOUSE Glomulin OS=Mus musculus OX=10090 GN=Glmn PE=1 SV=1;sp|Q8BZM1|GLMN_MOUSE	4	1	1	1	1	1	1	1	1	1	1	1	1	1	1	1	10.3	10.3	10.3	11.412	97	97;100;532;596	0.0084349	1.5715	By matching	By matching	By matching	By MS/MS	0.80814	1.0402	26.501	4	0	Median	NaN	NaN	NaN	NaN	NaN	NaN	NaN	NaN
Q9D9P1;D3Z0L4;Q9CRB9	Q9D9P1;D3Z0L4;Q9CRB9	1;1;1	1;1;1	1;1;1	MICOS complex subunit Mic19	Chchd3	tr|Q9D9P1|Q9D9P1_MOUSE MICOS complex subunit OS=Mus musculus OX=10090 GN=Chchd3 PE=1 SV=1;tr|D3Z0L4|D3Z0L4_MOUSE MICOS complex subunit (Fragment) OS=Mus musculus OX=10090 GN=Chchd3 PE=1 SV=1;sp|Q9CRB9|MIC19_MOUSE MICOS complex subunit Mic19 OS=Mus musculus	3	1	1	1	0	0	0	1	0	0	0	1	0	0	0	1	5.1	5.1	5.1	20.375	175	175;192;227	0.005314	1.7657				By MS/MS	NaN	NaN	NaN	0	0	Median	NaN	NaN	NaN	NaN	NaN	NaN	NaN	NaN
D3Z0M9	D3Z0M9	3	3	3		Ddx23	tr|D3Z0M9|D3Z0M9_MOUSE DEAD (Asp-Glu-Ala-Asp) box polypeptide 23 OS=Mus musculus OX=10090 GN=Ddx23 PE=1 SV=1	1	3	3	3	1	0	2	2	1	0	2	2	1	0	2	2	3.9	3.9	3.9	95.493	819	819	0	4.2339	By MS/MS		By MS/MS	By MS/MS	5.0123	6.4069	120.2	3	3	Median	NaN	NaN	NaN	2.0929	NaN	NaN	NaN	2.6304
G3X9T4;D3Z134;Q8VI64	G3X9T4;D3Z134;Q8VI64	1;1;1	1;1;1	1;1;1	Protein MGARP	Mgarp	tr|G3X9T4|G3X9T4_MOUSE Protein MGARP OS=Mus musculus OX=10090 GN=Mgarp PE=1 SV=1;tr|D3Z134|D3Z134_MOUSE Protein MGARP OS=Mus musculus OX=10090 GN=Mgarp PE=1 SV=2;sp|Q8VI64|HUMMR_MOUSE Protein MGARP OS=Mus musculus OX=10090 GN=Mgarp PE=1 SV=1	3	1	1	1	1	1	0	0	1	1	0	0	1	1	0	0	4	4	4	29.067	275	275;297;283	0.0010747	2.5982	By MS/MS	By MS/MS			0.22802	0.29386	148.19	2	2	Median	NaN	NaN	NaN	NaN	NaN	NaN	NaN	NaN
D3Z158;Q8BML9;A0A140LHZ5;A0A140LHB3;A0A140LIS6;A0A140LIZ4;A0A140LHJ3;A0A140LJK5;A0A140LJH1;A0A0A6YY08;F6TDS3;A0A140LIN2	D3Z158;Q8BML9;A0A140LHZ5	13;13;7;5;5;4;3;3;2;2;1;1	12;12;6;5;5;3;3;3;2;2;1;1	12;12;6;5;5;3;3;3;2;2;1;1		Qars	tr|D3Z158|D3Z158_MOUSE Glutamine--tRNA ligase OS=Mus musculus OX=10090 GN=Qars PE=1 SV=2;sp|Q8BML9|SYQ_MOUSE Glutamine--tRNA ligase OS=Mus musculus OX=10090 GN=Qars PE=1 SV=1;tr|A0A140LHZ5|A0A140LHZ5_MOUSE Glutamine--tRNA ligase (Fragment) OS=Mus musculus	12	13	12	12	3	9	7	7	2	8	6	6	2	8	6	6	23.3	22.2	22.2	85.054	751	751;775;341;246;273;117;173;182;100;152;154;160	0	40.106	By MS/MS	By MS/MS	By MS/MS	By MS/MS	0.65988	0.95025	8.2541	20	9	Leave out requantified	0.31697	0.54093	0.65584	0.7252	0.43939	0.87551	0.94339	0.88968
D3Z198;Q9CQE3;D3YWF8	D3Z198;Q9CQE3;D3YWF8	2;2;1	2;2;1	2;2;1	28S ribosomal protein S17, mitochondrial	Mrps17	tr|D3Z198|D3Z198_MOUSE 28S ribosomal protein S17, mitochondrial (Fragment) OS=Mus musculus OX=10090 GN=Mrps17 PE=1 SV=1;sp|Q9CQE3|RT17_MOUSE 28S ribosomal protein S17, mitochondrial OS=Mus musculus OX=10090 GN=Mrps17 PE=1 SV=1;tr|D3YWF8|D3YWF8_MOUSE 28S ri	3	2	2	2	2	2	2	2	2	2	2	2	2	2	2	2	20.7	20.7	20.7	9.9008	87	87;120;75	0	2.7965	By MS/MS	By MS/MS	By matching	By MS/MS	0.74466	1.0758	20.118	8	1	Leave out requantified	0.68874	0.48554	0.75842	0.79576	0.94902	0.81906	1.0892	0.97211
D3Z1H8;D3Z1H9;Q9JL62	D3Z1H8;D3Z1H9;Q9JL62	1;1;1	1;1;1	1;1;1	Glycolipid transfer protein	Gltp	tr|D3Z1H8|D3Z1H8_MOUSE Glycolipid transfer protein OS=Mus musculus OX=10090 GN=Gltp PE=1 SV=1;tr|D3Z1H9|D3Z1H9_MOUSE Glycolipid transfer protein OS=Mus musculus OX=10090 GN=Gltp PE=1 SV=1;sp|Q9JL62|GLTP_MOUSE Glycolipid transfer protein OS=Mus musculus OX=	3	1	1	1	0	0	0	1	0	0	0	1	0	0	0	1	5	5	5	20.275	179	179;190;209	0.0044379	1.9158				By MS/MS	NaN	NaN	NaN	1	0	Median	NaN	NaN	NaN	NaN	NaN	NaN	NaN	NaN
D3Z227;O88587	D3Z227;O88587	1;1	1;1	1;1	Catechol O-methyltransferase	Comt	tr|D3Z227|D3Z227_MOUSE Catechol O-methyltransferase (Fragment) OS=Mus musculus OX=10090 GN=Comt PE=1 SV=1;sp|O88587|COMT_MOUSE Catechol O-methyltransferase OS=Mus musculus OX=10090 GN=Comt PE=1 SV=2	2	1	1	1	0	1	0	0	0	1	0	0	0	1	0	0	5.3	5.3	5.3	18.936	171	171;265	0.0057637	1.7368		By MS/MS			NaN	NaN	NaN	1	1	Median	NaN	NaN	NaN	NaN	NaN	NaN	NaN	NaN
D3Z2E3;F6R6F1;E9Q632;O54916	D3Z2E3;F6R6F1;E9Q632;O54916	1;1;1;1	1;1;1;1	1;1;1;1	RalBP1-associated Eps domain-containing protein 1	Reps1	tr|D3Z2E3|D3Z2E3_MOUSE RalBP1-associated Eps domain-containing protein 1 OS=Mus musculus OX=10090 GN=Reps1 PE=1 SV=1;tr|F6R6F1|F6R6F1_MOUSE RalBP1-associated Eps domain-containing protein 1 (Fragment) OS=Mus musculus OX=10090 GN=Reps1 PE=1 SV=1;tr|E9Q632|E	4	1	1	1	0	0	0	1	0	0	0	1	0	0	0	1	2.3	2.3	2.3	76.826	705	705;755;768;795	0	2.9521				By MS/MS	NaN	NaN	NaN	0	0	Median	NaN	NaN	NaN	NaN	NaN	NaN	NaN	NaN
D3Z2H7;E9Q986;D3Z7H6;E9Q906;E9Q907;E9Q905;E9Q8Z4;E9Q8Z9;D3Z2H2;E9Q903;E9Q901;E9Q904;G3X9V2;E9Q8Z5;E9Q8Z6;E9Q8Z8;P30999	D3Z2H7;E9Q986;D3Z7H6;E9Q906;E9Q907;E9Q905;E9Q8Z4;E9Q8Z9;D3Z2H2;E9Q903;E9Q901;E9Q904;G3X9V2;E9Q8Z5;E9Q8Z6;E9Q8Z8;P30999	1;1;1;1;1;1;1;1;1;1;1;1;1;1;1;1;1	1;1;1;1;1;1;1;1;1;1;1;1;1;1;1;1;1	1;1;1;1;1;1;1;1;1;1;1;1;1;1;1;1;1	Catenin delta-1	Ctnnd1	tr|D3Z2H7|D3Z2H7_MOUSE Catenin delta-1 OS=Mus musculus OX=10090 GN=Ctnnd1 PE=1 SV=1;tr|E9Q986|E9Q986_MOUSE Catenin delta-1 OS=Mus musculus OX=10090 GN=Ctnnd1 PE=1 SV=1;tr|D3Z7H6|D3Z7H6_MOUSE Catenin delta-1 OS=Mus musculus OX=10090 GN=Ctnnd1 PE=1 SV=1;tr|E	17	1	1	1	1	0	0	0	1	0	0	0	1	0	0	0	2.5	2.5	2.5	67.935	609	609;830;837;839;860;866;868;878;884;892;907;913;932;940;961;967;938	0	3.6946	By MS/MS				NaN	NaN	NaN	1	1	Median	NaN	NaN	NaN	NaN	NaN	NaN	NaN	NaN
D3Z2H9;E9Q5J9;A0A0R4J1P2;P21107;CON__Q3SX28;A2AIM4;P58774;D3YVR0;A2AIM5	D3Z2H9;E9Q5J9	19;16;8;8;5;5;5;3;3	19;16;8;8;5;5;5;3;3	8;8;0;0;0;0;0;0;0		Tpm3-rs7;Tpm3	tr|D3Z2H9|D3Z2H9_MOUSE Uncharacterized protein OS=Mus musculus OX=10090 GN=Tpm3-rs7 PE=3 SV=1;tr|E9Q5J9|E9Q5J9_MOUSE Tropomyosin alpha-3 chain OS=Mus musculus OX=10090 GN=Tpm3 PE=1 SV=1	9	19	19	8	15	16	16	13	15	16	16	13	6	5	8	6	62.5	62.5	25.4	28.991	248	248;285;284;285;284;284;284;71;105	0	115.96	By MS/MS	By MS/MS	By MS/MS	By MS/MS	0.76636	1.1407	8.6183	54	26	Leave out requantified	0.79059	0.70345	0.84852	0.84897	1.1213	1.1971	1.2443	1.0634
D3Z2J6;Q9D710	D3Z2J6;Q9D710	1;1	1;1	1;1	Thioredoxin-related transmembrane protein 2	Tmx2	tr|D3Z2J6|D3Z2J6_MOUSE Thioredoxin-related transmembrane protein 2 OS=Mus musculus OX=10090 GN=Tmx2 PE=1 SV=1;sp|Q9D710|TMX2_MOUSE Thioredoxin-related transmembrane protein 2 OS=Mus musculus OX=10090 GN=Tmx2 PE=1 SV=1	2	1	1	1	1	1	1	1	1	1	1	1	1	1	1	1	4.7	4.7	4.7	29.591	257	257;295	0.0025641	2.1708	By MS/MS	By MS/MS	By MS/MS	By MS/MS	0.61591	1.2036	18.231	4	0	Linear	NaN	NaN	NaN	NaN	NaN	NaN	NaN	NaN
D3Z2N7;E9Q3X0;Q9EQK5	D3Z2N7;E9Q3X0;Q9EQK5	3;3;3	3;3;3	3;3;3	Major vault protein	Mvp	tr|D3Z2N7|D3Z2N7_MOUSE Major vault protein (Fragment) OS=Mus musculus OX=10090 GN=Mvp PE=1 SV=2;tr|E9Q3X0|E9Q3X0_MOUSE Major vault protein OS=Mus musculus OX=10090 GN=Mvp PE=1 SV=1;sp|Q9EQK5|MVP_MOUSE Major vault protein OS=Mus musculus OX=10090 GN=Mvp PE=	3	3	3	3	3	2	3	3	3	2	3	3	3	2	3	3	29.9	29.9	29.9	15.151	134	134;870;861	0	7.5889	By MS/MS	By MS/MS	By MS/MS	By MS/MS	0.54639	0.79081	4.0584	11	3	Leave out requantified	1.3052	0.47608	0.91778	0.72253	1.8207	0.79569	1.0243	0.87716
D3Z383;Q07646	D3Z383;Q07646	1;1	1;1	1;1	Mesoderm-specific transcript protein	Mest	tr|D3Z383|D3Z383_MOUSE Mesoderm specific transcript, isoform CRA_a OS=Mus musculus OX=10090 GN=Mest PE=1 SV=2;sp|Q07646|MEST_MOUSE Mesoderm-specific transcript protein OS=Mus musculus OX=10090 GN=Mest PE=2 SV=1	2	1	1	1	0	1	1	1	0	1	1	1	0	1	1	1	2.6	2.6	2.6	39.502	342	342;335	0.001556	2.2881		By MS/MS	By MS/MS	By MS/MS	0.094663	0.10526	41.752	3	3	Median	NaN	NaN	NaN	NaN	NaN	NaN	NaN	NaN
D3Z3F1;Q9D824	D3Z3F1;Q9D824	2;2	2;2	2;2	Pre-mRNA 3-end-processing factor FIP1	Fip1l1	tr|D3Z3F1|D3Z3F1_MOUSE Pre-mRNA 3-end-processing factor FIP1 (Fragment) OS=Mus musculus OX=10090 GN=Fip1l1 PE=1 SV=2;sp|Q9D824|FIP1_MOUSE Pre-mRNA 3-end-processing factor FIP1 OS=Mus musculus OX=10090 GN=Fip1l1 PE=1 SV=1	2	2	2	2	0	1	2	1	0	1	2	1	0	1	2	1	6.2	6.2	6.2	46.449	434	434;581	0	6.9058		By MS/MS	By MS/MS	By MS/MS	0.1805	0.22283	97.305	4	4	Median	NaN	NaN	0.25042	NaN	NaN	NaN	0.31663	NaN
D3Z3G6;Q63844;A0A0U1RPZ0;D3Z6D8;A0A0U1RPX4	D3Z3G6;Q63844;A0A0U1RPZ0;D3Z6D8;A0A0U1RPX4	3;3;2;2;2	2;2;1;1;1	2;2;1;1;1	Mitogen-activated protein kinase;Mitogen-activated protein kinase 3	Mapk3	tr|D3Z3G6|D3Z3G6_MOUSE Mitogen-activated protein kinase OS=Mus musculus OX=10090 GN=Mapk3 PE=1 SV=1;sp|Q63844|MK03_MOUSE Mitogen-activated protein kinase 3 OS=Mus musculus OX=10090 GN=Mapk3 PE=1 SV=5;tr|A0A0U1RPZ0|A0A0U1RPZ0_MOUSE Mitogen-activated protein	5	3	2	2	1	1	3	3	1	1	2	2	1	1	2	2	8.9	6.3	6.3	42.401	380	380;380;214;265;335	0.0010644	2.5102	By MS/MS	By matching	By MS/MS	By MS/MS	0.67913	0.92539	61.857	6	2	Median	NaN	NaN	0.82662	1.5324	NaN	NaN	1.0563	1.9128
F6VRS2;D3Z3W7;Q6WBX7	F6VRS2;D3Z3W7;Q6WBX7	1;1;1	1;1;1	1;1;1	Cell cycle checkpoint control protein RAD9B	Rad9b	tr|F6VRS2|F6VRS2_MOUSE Cell cycle checkpoint control protein RAD9B (Fragment) OS=Mus musculus OX=10090 GN=Rad9b PE=4 SV=1;tr|D3Z3W7|D3Z3W7_MOUSE Cell cycle checkpoint control protein RAD9B OS=Mus musculus OX=10090 GN=Rad9b PE=1 SV=2;sp|Q6WBX7|RAD9B_MOUSE C	3	1	1	1	1	1	1	1	1	1	1	1	1	1	1	1	13	13	13	10.351	92	92;366;403	1	-2	By MS/MS	By matching	By matching	By matching	0.93814	1.1964	16.289	4	0	Median	NaN	NaN	NaN	NaN	NaN	NaN	NaN	NaN
D3Z487;Q99LD9;D3Z7J6	D3Z487;Q99LD9;D3Z7J6	4;4;2	4;4;2	4;4;2	Translation initiation factor eIF-2B subunit beta	Eif2b2	tr|D3Z487|D3Z487_MOUSE Translation initiation factor eIF-2B subunit beta (Fragment) OS=Mus musculus OX=10090 GN=Eif2b2 PE=1 SV=1;sp|Q99LD9|EI2BB_MOUSE Translation initiation factor eIF-2B subunit beta OS=Mus musculus OX=10090 GN=Eif2b2 PE=1 SV=1;tr|D3Z7J6|	3	4	4	4	1	3	2	2	1	3	2	2	1	3	2	2	16.6	16.6	16.6	33.816	302	302;351;228	0	10.043	By MS/MS	By MS/MS	By MS/MS	By MS/MS	0.61681	0.85609	16.106	10	2	Median	0.61691	0.52688	0.60179	0.71955	0.85609	0.85781	0.8602	0.87595
D3Z494;G5E895;S4R2G9;P45377;P21300	D3Z494;G5E895;S4R2G9;P45377;P21300	2;2;1;1;1	2;2;1;1;1	2;2;1;1;1	Aldose reductase-related protein 2;Aldose reductase-related protein 1	Akr1b10;Akr1b8;Akr1b7	tr|D3Z494|D3Z494_MOUSE Aldo-keto reductase family 1, member B10 (aldose reductase) OS=Mus musculus OX=10090 GN=Akr1b10 PE=1 SV=1;tr|G5E895|G5E895_MOUSE Aldo-keto reductase family 1, member B10 (aldose reductase) OS=Mus musculus OX=10090 GN=Akr1b10 PE=1 SV=	5	2	2	2	2	2	2	2	2	2	2	2	2	2	2	2	6.6	6.6	6.6	32.745	288	288;316;145;316;316	0	4.8805	By MS/MS	By MS/MS	By MS/MS	By MS/MS	0.56671	0.8328	18.574	8	0	Leave out requantified	0.61893	0.48091	0.55274	0.63924	0.90281	0.83617	0.82711	0.79285
D3Z4J5;Q9D1H7	D3Z4J5;Q9D1H7	1;1	1;1	1;1	Golgi to ER traffic protein 4 homolog	Get4	tr|D3Z4J5|D3Z4J5_MOUSE Golgi to ER traffic protein 4 homolog (Fragment) OS=Mus musculus OX=10090 GN=Get4 PE=1 SV=1;sp|Q9D1H7|GET4_MOUSE Golgi to ER traffic protein 4 homolog OS=Mus musculus OX=10090 GN=Get4 PE=1 SV=2	2	1	1	1	0	1	0	0	0	1	0	0	0	1	0	0	5.3	5.3	5.3	27.58	246	246;327	0	3.9191		By MS/MS			NaN	NaN	NaN	1	1	Median	NaN	NaN	NaN	NaN	NaN	NaN	NaN	NaN
D3Z5I1;Q3UPF5;G3X9X5	D3Z5I1;Q3UPF5;G3X9X5	4;4;3	4;4;3	4;4;3	Zinc finger CCCH-type antiviral protein 1	Zc3hav1	tr|D3Z5I1|D3Z5I1_MOUSE Zinc finger CCCH-type antiviral protein 1 OS=Mus musculus OX=10090 GN=Zc3hav1 PE=1 SV=1;sp|Q3UPF5|ZCCHV_MOUSE Zinc finger CCCH-type antiviral protein 1 OS=Mus musculus OX=10090 GN=Zc3hav1 PE=1 SV=1;tr|G3X9X5|G3X9X5_MOUSE Zinc finger	3	4	4	4	2	2	0	2	2	2	0	2	2	2	0	2	5.2	5.2	5.2	112.53	996	996;946;673	0	8.6477	By MS/MS	By MS/MS		By MS/MS	NaN	NaN	NaN	0	0	Median	NaN	NaN	NaN	NaN	NaN	NaN	NaN	NaN
G8JL76;D3Z636;Q91VM9	G8JL76;D3Z636;Q91VM9	1;1;1	1;1;1	1;1;1	Inorganic pyrophosphatase 2, mitochondrial	Ppa2	tr|G8JL76|G8JL76_MOUSE Inorganic pyrophosphatase 2, mitochondrial (Fragment) OS=Mus musculus OX=10090 GN=Ppa2 PE=1 SV=1;tr|D3Z636|D3Z636_MOUSE Inorganic pyrophosphatase 2, mitochondrial OS=Mus musculus OX=10090 GN=Ppa2 PE=1 SV=1;sp|Q91VM9|IPYR2_MOUSE Inorg	3	1	1	1	1	1	1	0	1	1	1	0	1	1	1	0	8.6	8.6	8.6	17.2	152	152;329;330	0	3.9242	By MS/MS	By MS/MS	By MS/MS		NaN	NaN	NaN	1	1	Median	NaN	NaN	NaN	NaN	NaN	NaN	NaN	NaN
D3Z6B9;Q8K009;A0A0N4SW56;A0A0N4SVT2	D3Z6B9;Q8K009	16;16;2;1	16;16;2;1	13;13;0;0	Mitochondrial 10-formyltetrahydrofolate dehydrogenase	Aldh1l2	tr|D3Z6B9|D3Z6B9_MOUSE Mitochondrial 10-formyltetrahydrofolate dehydrogenase OS=Mus musculus OX=10090 GN=Aldh1l2 PE=1 SV=1;sp|Q8K009|AL1L2_MOUSE Mitochondrial 10-formyltetrahydrofolate dehydrogenase OS=Mus musculus OX=10090 GN=Aldh1l2 PE=1 SV=2	4	16	16	13	10	9	8	9	10	9	8	9	8	7	8	7	27.8	27.8	24.1	88.896	810	810;923;359;135	0	49.753	By MS/MS	By MS/MS	By MS/MS	By MS/MS	0.5678	0.85961	31.494	30	11	Leave out requantified	0.56871	0.5017	0.49883	0.72899	0.83361	0.88143	0.717	0.90595
D3Z6I8;E9Q7Q3	D3Z6I8;E9Q7Q3	13;13	2;2	2;2		Tpm3	tr|D3Z6I8|D3Z6I8_MOUSE Tropomyosin alpha-3 chain OS=Mus musculus OX=10090 GN=Tpm3 PE=1 SV=1;tr|E9Q7Q3|E9Q7Q3_MOUSE Tropomyosin alpha-3 chain OS=Mus musculus OX=10090 GN=Tpm3 PE=1 SV=1	2	13	2	2	10	13	10	8	1	2	2	1	1	2	2	1	44.5	6.1	6.1	28.723	247	247;248	0	7.352	By MS/MS	By MS/MS	By MS/MS	By MS/MS	0.14294	0.13386	98.043	6	6	Median	0.11054	NaN	NaN	0.27699	0.10694	NaN	NaN	0.25109
D3Z6S4;Q3UVD5	D3Z6S4;Q3UVD5	1;1	1;1	1;1	Leucine-rich repeat-containing G-protein coupled receptor 6	Lgr6	tr|D3Z6S4|D3Z6S4_MOUSE Leucine-rich repeat-containing G-protein-coupled receptor 6 OS=Mus musculus OX=10090 GN=Lgr6 PE=4 SV=1;sp|Q3UVD5|LGR6_MOUSE Leucine-rich repeat-containing G-protein coupled receptor 6 OS=Mus musculus OX=10090 GN=Lgr6 PE=2 SV=1	2	1	1	1	0	0	1	0	0	0	1	0	0	0	1	0	1	1	1	73.671	690	690;967	0.004845	1.7936			By MS/MS		NaN	NaN	NaN	1	1	Median	NaN	NaN	NaN	NaN	NaN	NaN	NaN	NaN
D3Z7J7;D3Z6Y9;Q99LN9;D3YZM0;F6TY47	D3Z7J7;D3Z6Y9;Q99LN9	3;3;3;1;1	3;3;3;1;1	3;3;3;1;1	Deoxyhypusine hydroxylase	Dohh	tr|D3Z7J7|D3Z7J7_MOUSE Deoxyhypusine hydroxylase (Fragment) OS=Mus musculus OX=10090 GN=Dohh PE=1 SV=8;tr|D3Z6Y9|D3Z6Y9_MOUSE Deoxyhypusine hydroxylase OS=Mus musculus OX=10090 GN=Dohh PE=1 SV=1;sp|Q99LN9|DOHH_MOUSE Deoxyhypusine hydroxylase OS=Mus musculu	5	3	3	3	2	1	2	1	2	1	2	1	2	1	2	1	24.6	24.6	24.6	20.461	187	187;213;302;73;224	0	13.639	By MS/MS	By MS/MS	By MS/MS	By MS/MS	0.71464	1.1404	144.07	5	2	Median	0.18749	NaN	NaN	NaN	0.2352	NaN	NaN	NaN
D3Z780;Q61749;A0A0J9YUY0;A0A0J9YTQ7;F7CPG6	D3Z780;Q61749;A0A0J9YUY0	7;7;4;1;1	7;7;4;1;1	7;7;4;1;1	Translation initiation factor eIF-2B subunit delta	Eif2b4	tr|D3Z780|D3Z780_MOUSE Translation initiation factor eIF-2B subunit delta OS=Mus musculus OX=10090 GN=Eif2b4 PE=1 SV=1;sp|Q61749|EI2BD_MOUSE Translation initiation factor eIF-2B subunit delta OS=Mus musculus OX=10090 GN=Eif2b4 PE=1 SV=2;tr|A0A0J9YUY0|A0A0J	5	7	7	7	5	5	5	6	5	5	5	6	5	5	5	6	17.7	17.7	17.7	62.352	566	566;524;245;100;163	0	22.742	By MS/MS	By MS/MS	By MS/MS	By MS/MS	0.11924	0.15911	136.78	18	16	Median	0.081807	0.069676	0.20636	0.19614	0.11396	0.083071	0.22946	0.25071
H7BWX9;D3Z794;P61957;G3UZX6	H7BWX9;D3Z794;P61957;G3UZX6	2;2;2;1	2;2;2;1	1;1;1;0	Small ubiquitin-related modifier 2	Sumo2;Sumo3	tr|H7BWX9|H7BWX9_MOUSE Small ubiquitin-related modifier 2 OS=Mus musculus OX=10090 GN=Sumo2 PE=1 SV=1;tr|D3Z794|D3Z794_MOUSE Small ubiquitin-related modifier 2 OS=Mus musculus OX=10090 GN=Sumo2 PE=1 SV=1;sp|P61957|SUMO2_MOUSE Small ubiquitin-related modifi	4	2	2	1	2	2	2	2	2	2	2	2	1	1	1	1	41.5	41.5	18.9	6.0139	53	53;71;95;47	0	21.606	By MS/MS	By MS/MS	By MS/MS	By MS/MS	0.71566	1.018	0.95533	12	0	Leave out requantified	0.72119	0.6574	0.70795	0.8209	1.0112	1.0838	1.0264	1.0235
D3Z7C0;Q9Z2Q5	D3Z7C0;Q9Z2Q5	1;1	1;1	1;1	39S ribosomal protein L40, mitochondrial	Mrpl40	tr|D3Z7C0|D3Z7C0_MOUSE 39S ribosomal protein L40, mitochondrial OS=Mus musculus OX=10090 GN=Mrpl40 PE=1 SV=1;sp|Q9Z2Q5|RM40_MOUSE 39S ribosomal protein L40, mitochondrial OS=Mus musculus OX=10090 GN=Mrpl40 PE=1 SV=2	2	1	1	1	0	0	0	1	0	0	0	1	0	0	0	1	9.9	9.9	9.9	19.378	162	162;206	0.0015732	2.3782				By MS/MS	NaN	NaN	NaN	0	0	Median	NaN	NaN	NaN	NaN	NaN	NaN	NaN	NaN
D3Z7D2;Q9Z120	D3Z7D2;Q9Z120	1;1	1;1	1;1	tRNA (guanine-N(7)-)-methyltransferase	Mettl1	tr|D3Z7D2|D3Z7D2_MOUSE tRNA (guanine-N(7)-)-methyltransferase OS=Mus musculus OX=10090 GN=Mettl1 PE=1 SV=1;sp|Q9Z120|TRMB_MOUSE tRNA (guanine-N(7)-)-methyltransferase OS=Mus musculus OX=10090 GN=Mettl1 PE=1 SV=1	2	1	1	1	1	0	0	1	1	0	0	1	1	0	0	1	6.6	6.6	6.6	25.839	228	228;268	0	3.0426	By MS/MS			By MS/MS	NaN	NaN	NaN	0	0	Median	NaN	NaN	NaN	NaN	NaN	NaN	NaN	NaN
D3Z7E6;Q61205;D3Z2X5;Q8CA83	D3Z7E6;Q61205;D3Z2X5	4;4;2;1	4;4;2;1	4;4;2;1	Platelet-activating factor acetylhydrolase IB subunit gamma	Pafah1b3	tr|D3Z7E6|D3Z7E6_MOUSE Platelet-activating factor acetylhydrolase IB subunit gamma OS=Mus musculus OX=10090 GN=Pafah1b3 PE=1 SV=1;sp|Q61205|PA1B3_MOUSE Platelet-activating factor acetylhydrolase IB subunit gamma OS=Mus musculus OX=10090 GN=Pafah1b3 PE=1 SV	4	4	4	4	4	4	3	3	4	4	3	3	4	4	3	3	23.3	23.3	23.3	20.149	180	180;232;143;157	0	8.7264	By MS/MS	By MS/MS	By MS/MS	By MS/MS	0.57732	0.83324	24.995	9	5	Median	0.6619	0.52576	0.69554	0.77052	0.9264	0.74536	0.88278	0.9849
D3Z7M5;Q9CPT5	D3Z7M5;Q9CPT5	3;3	3;3	3;3	Nucleolar protein 16	Nop16	tr|D3Z7M5|D3Z7M5_MOUSE Nucleolar protein 16 OS=Mus musculus OX=10090 GN=Nop16 PE=1 SV=1;sp|Q9CPT5|NOP16_MOUSE Nucleolar protein 16 OS=Mus musculus OX=10090 GN=Nop16 PE=1 SV=1	2	3	3	3	1	2	1	1	1	2	1	1	1	2	1	1	13.8	13.8	13.8	21.508	181	181;178	0	3.5659	By MS/MS	By MS/MS	By MS/MS	By MS/MS	0.12721	0.14028	77.827	3	3	Median	NaN	NaN	NaN	NaN	NaN	NaN	NaN	NaN
D3Z7P0;Q8K3W0;E9Q8Q1;A0A0J9YV56;E9Q0U3	D3Z7P0;Q8K3W0;E9Q8Q1;A0A0J9YV56;E9Q0U3	2;2;1;1;1	2;2;1;1;1	2;2;1;1;1	BRCA1-A complex subunit BRE	Bre	tr|D3Z7P0|D3Z7P0_MOUSE BRISC and BRCA1-A complex member 2 OS=Mus musculus OX=10090 GN=Babam2 PE=1 SV=3;sp|Q8K3W0|BABA2_MOUSE BRISC and BRCA1-A complex member 2 OS=Mus musculus OX=10090 GN=Babam2 PE=1 SV=2;tr|E9Q8Q1|E9Q8Q1_MOUSE BRISC and BRCA1-A complex me	5	2	2	2	1	1	2	1	1	1	2	1	1	1	2	1	7.3	7.3	7.3	43.749	385	385;383;43;63;205	0	3.6799	By MS/MS	By MS/MS	By MS/MS	By MS/MS	0.67568	1.1779	111.64	5	3	Median	NaN	NaN	0.23826	NaN	NaN	NaN	0.30127	NaN
D3Z7P4;D3Z7P3	D3Z7P4;D3Z7P3	1;1	1;1	1;1	Glutaminase kidney isoform, mitochondrial	Gls	tr|D3Z7P4|D3Z7P4_MOUSE Glutaminase kidney isoform, mitochondrial OS=Mus musculus OX=10090 GN=Gls PE=1 SV=1;sp|D3Z7P3|GLSK_MOUSE Glutaminase kidney isoform, mitochondrial OS=Mus musculus OX=10090 GN=Gls PE=1 SV=1	2	1	1	1	1	1	1	1	1	1	1	1	1	1	1	1	2.9	2.9	2.9	54.781	491	491;674	0	5.0838	By MS/MS	By MS/MS	By MS/MS	By MS/MS	0.24406	0.31197	65.474	3	3	Plateau	NaN	NaN	NaN	NaN	NaN	NaN	NaN	NaN
D6RJ72;D6RDC7;Q8BVQ0;Q9ERF3	D6RJ72;D6RDC7;Q8BVQ0;Q9ERF3	1;1;1;1	1;1;1;1	1;1;1;1	WD repeat-containing protein 61;WD repeat-containing protein 61, N-terminally processed	Wdr61	tr|D6RJ72|D6RJ72_MOUSE WD repeat-containing protein 61 (Fragment) OS=Mus musculus OX=10090 GN=Wdr61 PE=1 SV=1;tr|D6RDC7|D6RDC7_MOUSE WD repeat-containing protein 61 OS=Mus musculus OX=10090 GN=Wdr61 PE=1 SV=2;tr|Q8BVQ0|Q8BVQ0_MOUSE WD repeat-containing pro	4	1	1	1	1	0	1	1	1	0	1	1	1	0	1	1	10.3	10.3	10.3	11.492	107	107;207;279;305	0.0084428	1.5775	By MS/MS		By MS/MS	By MS/MS	0.63272	0.85412	0.93931	3	1	Plateau	NaN	NaN	NaN	NaN	NaN	NaN	NaN	NaN
D6RDT6;Q91W96	D6RDT6;Q91W96	1;1	1;1	1;1	Anaphase-promoting complex subunit 4	Anapc4	tr|D6RDT6|D6RDT6_MOUSE Anaphase-promoting complex subunit 4 OS=Mus musculus OX=10090 GN=Anapc4 PE=1 SV=1;sp|Q91W96|APC4_MOUSE Anaphase-promoting complex subunit 4 OS=Mus musculus OX=10090 GN=Anapc4 PE=1 SV=1	2	1	1	1	1	0	1	1	1	0	1	1	1	0	1	1	19.5	19.5	19.5	9.4089	82	82;807	0	3.2589	By MS/MS		By MS/MS	By MS/MS	0.15958	0.17744	66.887	3	3	Median	NaN	NaN	NaN	NaN	NaN	NaN	NaN	NaN
D6REF7;Q8R0X7	D6REF7;Q8R0X7	1;1	1;1	1;1	Sphingosine-1-phosphate lyase 1	Sgpl1	tr|D6REF7|D6REF7_MOUSE Sphingosine-1-phosphate lyase 1 OS=Mus musculus OX=10090 GN=Sgpl1 PE=1 SV=1;sp|Q8R0X7|SGPL1_MOUSE Sphingosine-1-phosphate lyase 1 OS=Mus musculus OX=10090 GN=Sgpl1 PE=1 SV=1	2	1	1	1	0	0	1	0	0	0	1	0	0	0	1	0	2.3	2.3	2.3	54.769	487	487;568	0.0034948	1.9887			By MS/MS		NaN	NaN	NaN	1	1	Median	NaN	NaN	NaN	NaN	NaN	NaN	NaN	NaN
D6REG4;Q91Z53	D6REG4;Q91Z53	2;2	2;2	2;2	Glyoxylate reductase/hydroxypyruvate reductase	Grhpr	tr|D6REG4|D6REG4_MOUSE Glyoxylate reductase/hydroxypyruvate reductase OS=Mus musculus OX=10090 GN=Grhpr PE=1 SV=1;sp|Q91Z53|GRHPR_MOUSE Glyoxylate reductase/hydroxypyruvate reductase OS=Mus musculus OX=10090 GN=Grhpr PE=1 SV=1	2	2	2	2	2	1	1	1	2	1	1	1	2	1	1	1	12.7	12.7	12.7	21.262	197	197;328	0	4.7271	By MS/MS	By MS/MS	By MS/MS	By MS/MS	0.13962	0.16318	49.627	5	4	Median	0.17886	NaN	NaN	NaN	0.24916	NaN	NaN	NaN
D6RGT1;G3UWL8;G5E881;Q3TUH1	D6RGT1;G3UWL8;G5E881;Q3TUH1	1;1;1;1	1;1;1;1	1;1;1;1	Phosphatidate cytidylyltransferase, mitochondrial	Tamm41	tr|D6RGT1|D6RGT1_MOUSE Phosphatidate cytidylyltransferase, mitochondrial OS=Mus musculus OX=10090 GN=Tamm41 PE=1 SV=1;tr|G3UWL8|G3UWL8_MOUSE Phosphatidate cytidylyltransferase, mitochondrial (Fragment) OS=Mus musculus OX=10090 GN=Tamm41 PE=1 SV=8;tr|G5E881	4	1	1	1	0	1	0	1	0	1	0	1	0	1	0	1	8.7	8.7	8.7	16.254	149	149;221;337;337	0.0010741	2.5974		By MS/MS		By MS/MS	NaN	NaN	NaN	0	0	Median	NaN	NaN	NaN	NaN	NaN	NaN	NaN	NaN
D6RHN4;Q3UXD9;Q99MZ7	D6RHN4;Q3UXD9;Q99MZ7	1;1;1	1;1;1	1;1;1	Peroxisomal trans-2-enoyl-CoA reductase	Pecr	tr|D6RHN4|D6RHN4_MOUSE Peroxisomal trans-2-enoyl-CoA reductase OS=Mus musculus OX=10090 GN=Pecr PE=1 SV=1;tr|Q3UXD9|Q3UXD9_MOUSE Peroxisomal trans-2-enoyl-CoA reductase OS=Mus musculus OX=10090 GN=Pecr PE=1 SV=1;sp|Q99MZ7|PECR_MOUSE Peroxisomal trans-2-eno	3	1	1	1	0	1	0	0	0	1	0	0	0	1	0	0	10	10	10	9.3696	90	90;260;303	0.0044074	1.8778		By MS/MS			NaN	NaN	NaN	0	0	Median	NaN	NaN	NaN	NaN	NaN	NaN	NaN	NaN
D9J2Z9;D9J300;D9J301;D9J302;Q8CI51;A0A0G2JGZ5;A0A0G2JEJ0;Q9CRA2;D9J303;F8WJI6;E9Q8P5	D9J2Z9;D9J300;D9J301;D9J302;Q8CI51	5;5;5;5;5;2;2;1;1;1;1	5;5;5;5;5;2;2;1;1;1;1	5;5;5;5;5;2;2;1;1;1;1	PDZ and LIM domain protein 5	Pdlim5	tr|D9J2Z9|D9J2Z9_MOUSE ENH isoform 1b OS=Mus musculus OX=10090 GN=Pdlim5 PE=1 SV=1;tr|D9J300|D9J300_MOUSE ENH isoform 1c OS=Mus musculus OX=10090 GN=Pdlim5 PE=1 SV=1;tr|D9J301|D9J301_MOUSE ENH isoform 1d OS=Mus musculus OX=10090 GN=Pdlim5 PE=1 SV=1;tr|D9J3	11	5	5	5	4	3	3	4	4	3	3	4	4	3	3	4	10.8	10.8	10.8	52.396	482	482;526;574;614;591;223;253;214;234;239;239	0	12.663	By MS/MS	By MS/MS	By MS/MS	By MS/MS	1.1066	1.5922	0.84424	11	3	Leave out requantified	1.1667	1.0431	1.0332	1.2268	1.6398	1.7599	1.4955	1.467
E0CX19;Q8QZS1	E0CX19;Q8QZS1	1;1	1;1	1;1	3-hydroxyisobutyryl-CoA hydrolase, mitochondrial	Hibch	tr|E0CX19|E0CX19_MOUSE 3-hydroxyisobutyryl-CoA hydrolase, mitochondrial OS=Mus musculus OX=10090 GN=Hibch PE=1 SV=1;sp|Q8QZS1|HIBCH_MOUSE 3-hydroxyisobutyryl-CoA hydrolase, mitochondrial OS=Mus musculus OX=10090 GN=Hibch PE=1 SV=1	2	1	1	1	0	1	1	0	0	1	1	0	0	1	1	0	3.5	3.5	3.5	34.594	311	311;385	0.0044183	1.8993		By MS/MS	By MS/MS		0.054992	0.063318	99.16	2	2	Median	NaN	NaN	NaN	NaN	NaN	NaN	NaN	NaN
E0CYQ4;E0CX64;H3BK26;P49442	E0CYQ4;E0CX64;H3BK26;P49442	1;1;1;1	1;1;1;1	1;1;1;1	Inositol polyphosphate 1-phosphatase	Inpp1	tr|E0CYQ4|E0CYQ4_MOUSE Inositol polyphosphate 1-phosphatase (Fragment) OS=Mus musculus OX=10090 GN=Inpp1 PE=1 SV=1;tr|E0CX64|E0CX64_MOUSE Inositol polyphosphate 1-phosphatase (Fragment) OS=Mus musculus OX=10090 GN=Inpp1 PE=1 SV=1;tr|H3BK26|H3BK26_MOUSE Ino	4	1	1	1	0	0	1	1	0	0	1	1	0	0	1	1	15	15	15	9.0285	80	80;90;110;396	0.0015617	2.3129			By MS/MS	By MS/MS	0.48088	0.65197	16.543	2	2	Median	NaN	NaN	NaN	NaN	NaN	NaN	NaN	NaN
E0CXK8;E9PX53;E9QPR5;Q8K2V1;E0CYV2;F6TLH3	E0CXK8;E9PX53;E9QPR5;Q8K2V1;E0CYV2;F6TLH3	2;2;2;2;1;1	2;2;2;2;1;1	2;2;2;2;1;1	Serine/threonine-protein phosphatase 4 regulatory subunit 1	Ppp4r1	tr|E0CXK8|E0CXK8_MOUSE Serine/threonine-protein phosphatase 4 regulatory subunit 1 OS=Mus musculus OX=10090 GN=Ppp4r1 PE=1 SV=1;tr|E9PX53|E9PX53_MOUSE Serine/threonine-protein phosphatase 4 regulatory subunit 1 OS=Mus musculus OX=10090 GN=Ppp4r1 PE=1 SV=1;	6	2	2	2	1	2	1	1	1	2	1	1	1	2	1	1	5.9	5.9	5.9	42	376	376;934;951;951;154;189	0	2.7396	By MS/MS	By MS/MS	By MS/MS	By MS/MS	NaN	NaN	NaN	0	0	Median	NaN	NaN	NaN	NaN	NaN	NaN	NaN	NaN
F7CTF8;E0CYI3;E0CYB9;Q6PCP5	F7CTF8;E0CYI3;E0CYB9;Q6PCP5	1;1;1;1	1;1;1;1	1;1;1;1	Mitochondrial fission factor	Mff	tr|F7CTF8|F7CTF8_MOUSE Mitochondrial fission factor (Fragment) OS=Mus musculus OX=10090 GN=Mff PE=1 SV=1;tr|E0CYI3|E0CYI3_MOUSE Mitochondrial fission factor OS=Mus musculus OX=10090 GN=Mff PE=1 SV=1;tr|E0CYB9|E0CYB9_MOUSE Mitochondrial fission factor OS=Mu	4	1	1	1	0	0	0	1	0	0	0	1	0	0	0	1	12.3	12.3	12.3	24.791	220	220;243;316;291	0.0053089	1.7568				By MS/MS	NaN	NaN	NaN	1	1	Median	NaN	NaN	NaN	NaN	NaN	NaN	NaN	NaN
F7CCI4;E0CYH0;Q9ER69	F7CCI4;E0CYH0;Q9ER69	1;1;1	1;1;1	1;1;1	Pre-mRNA-splicing regulator WTAP	Wtap	tr|F7CCI4|F7CCI4_MOUSE Pre-mRNA-splicing regulator WTAP (Fragment) OS=Mus musculus OX=10090 GN=Wtap PE=1 SV=1;tr|E0CYH0|E0CYH0_MOUSE MCG16685, isoform CRA_d OS=Mus musculus OX=10090 GN=Wtap PE=1 SV=1;sp|Q9ER69|FL2D_MOUSE Pre-mRNA-splicing regulator WTAP OS	3	1	1	1	0	0	0	1	0	0	0	1	0	0	0	1	10.1	10.1	10.1	16.156	139	139;396;396	1	-2				By MS/MS	NaN	NaN	NaN	1	1	Median	NaN	NaN	NaN	NaN	NaN	NaN	NaN	NaN
E0CYH4;Q8C6G8	E0CYH4;Q8C6G8	2;2	2;2	2;2	WD repeat-containing protein 26	Wdr26	tr|E0CYH4|E0CYH4_MOUSE WD repeat-containing protein 26 OS=Mus musculus OX=10090 GN=Wdr26 PE=1 SV=1;sp|Q8C6G8|WDR26_MOUSE WD repeat-containing protein 26 OS=Mus musculus OX=10090 GN=Wdr26 PE=1 SV=3	2	2	2	2	1	2	1	1	1	2	1	1	1	2	1	1	3	3	3	68.879	625	625;641	0	3.092	By MS/MS	By MS/MS	By MS/MS	By MS/MS	NaN	NaN	NaN	1	1	Median	NaN	NaN	NaN	NaN	NaN	NaN	NaN	NaN
E0CYQ2;Q9CQ48	E0CYQ2;Q9CQ48	4;4	4;4	4;4	NudC domain-containing protein 2	Nudcd2	tr|E0CYQ2|E0CYQ2_MOUSE NudC domain-containing protein 2 OS=Mus musculus OX=10090 GN=Nudcd2 PE=1 SV=1;sp|Q9CQ48|NUDC2_MOUSE NudC domain-containing protein 2 OS=Mus musculus OX=10090 GN=Nudcd2 PE=1 SV=1	2	4	4	4	1	3	3	2	1	3	3	2	1	3	3	2	36.4	36.4	36.4	14.729	132	132;157	0	20.317	By MS/MS	By MS/MS	By MS/MS	By MS/MS	0.72277	1.0652	19.319	4	1	Median	NaN	NaN	0.63035	NaN	NaN	NaN	0.90645	NaN
E0CYU9;P56873	E0CYU9;P56873	1;1	1;1	1;1	Sjoegren syndrome/scleroderma autoantigen 1 homolog	Sssca1	tr|E0CYU9|E0CYU9_MOUSE Sjoegren syndrome/scleroderma autoantigen 1 homolog OS=Mus musculus OX=10090 GN=Sssca1 PE=1 SV=1;sp|P56873|SSA27_MOUSE Sjoegren syndrome/scleroderma autoantigen 1 homolog OS=Mus musculus OX=10090 GN=Sssca1 PE=1 SV=1	2	1	1	1	0	1	1	0	0	1	1	0	0	1	1	0	9.1	9.1	9.1	10.106	88	88;199	0.004427	1.913		By MS/MS	By MS/MS		3.3574	3.8657	32.748	2	2	Median	NaN	NaN	NaN	NaN	NaN	NaN	NaN	NaN
F7D432;E9PWE0;E0CYV0;P23506;F6V9F1;F6TXE3	F7D432;E9PWE0;E0CYV0;P23506;F6V9F1	7;7;7;7;5;1	7;7;7;7;5;1	7;7;7;7;5;1	Protein-L-isoaspartate O-methyltransferase;Protein-L-isoaspartate(D-aspartate) O-methyltransferase	Pcmt1	tr|F7D432|F7D432_MOUSE Protein-L-isoaspartate O-methyltransferase (Fragment) OS=Mus musculus OX=10090 GN=Pcmt1 PE=1 SV=1;tr|E9PWE0|E9PWE0_MOUSE Protein-L-isoaspartate O-methyltransferase OS=Mus musculus OX=10090 GN=Pcmt1 PE=1 SV=1;tr|E0CYV0|E0CYV0_MOUSE Pr	6	7	7	7	5	6	5	7	5	6	5	7	5	6	5	7	32.1	32.1	32.1	29.167	271	271;285;286;227;177;111	0	34.977	By MS/MS	By MS/MS	By MS/MS	By MS/MS	0.62483	0.9493	14.578	27	14	Leave out requantified	0.44991	0.57923	0.65363	0.79043	0.65212	0.97638	0.95129	0.97391
F8VQ42;E0CZ72;P28740	F8VQ42;E0CZ72;P28740	2;2;2	2;2;2	2;2;2	Kinesin-like protein;Kinesin-like protein KIF2A	Kif2a	tr|F8VQ42|F8VQ42_MOUSE Kinesin-like protein (Fragment) OS=Mus musculus OX=10090 GN=Kif2a PE=1 SV=1;tr|E0CZ72|E0CZ72_MOUSE Kinesin-like protein OS=Mus musculus OX=10090 GN=Kif2a PE=1 SV=1;sp|P28740|KIF2A_MOUSE Kinesin-like protein KIF2A OS=Mus musculus OX=1	3	2	2	2	2	1	0	1	2	1	0	1	2	1	0	1	3.6	3.6	3.6	75.968	671	671;743;705	0	7.7363	By MS/MS	By MS/MS		By MS/MS	0.06841	0.084452	157.79	4	4	Median	0.19681	NaN	NaN	NaN	0.24221	NaN	NaN	NaN
E0CZE0;Q8VBW6	E0CZE0;Q8VBW6	2;2	2;2	2;2	NEDD8-activating enzyme E1 regulatory subunit	Nae1	tr|E0CZE0|E0CZE0_MOUSE NEDD8-activating enzyme E1 regulatory subunit OS=Mus musculus OX=10090 GN=Nae1 PE=1 SV=1;sp|Q8VBW6|ULA1_MOUSE NEDD8-activating enzyme E1 regulatory subunit OS=Mus musculus OX=10090 GN=Nae1 PE=1 SV=1	2	2	2	2	1	2	0	0	1	2	0	0	1	2	0	0	3.7	3.7	3.7	57.619	510	510;534	0.0010828	2.6709	By MS/MS	By MS/MS			0.22095	0.26342	94.961	2	2	Median	NaN	0.22095	NaN	NaN	NaN	0.26342	NaN	NaN
E9PU93;Q91X20;D6RI55;D3YYA0;D6RET1	E9PU93;Q91X20;D6RI55;D3YYA0	3;3;2;2;1	3;3;2;2;1	3;3;2;2;1	Set1/Ash2 histone methyltransferase complex subunit ASH2	Ash2l	tr|E9PU93|E9PU93_MOUSE Set1/Ash2 histone methyltransferase complex subunit ASH2 OS=Mus musculus OX=10090 GN=Ash2l PE=1 SV=1;sp|Q91X20|ASH2L_MOUSE Set1/Ash2 histone methyltransferase complex subunit ASH2 OS=Mus musculus OX=10090 GN=Ash2l PE=1 SV=1;tr|D6RI55	5	3	3	3	2	2	3	2	2	2	3	2	2	2	3	2	7.5	7.5	7.5	60.17	534	534;623;346;501;352	0	5.3068	By matching	By MS/MS	By MS/MS	By MS/MS	0.69994	1.0136	19.477	10	1	Leave out requantified	0.66107	0.51903	0.69994	0.75348	0.90285	0.88471	0.99562	0.92124
E9PUA7;D3Z637;D3Z125;D3Z7X7;F8WHQ1;Q62393;D3Z2U2	E9PUA7;D3Z637;D3Z125;D3Z7X7;F8WHQ1;Q62393	4;3;3;3;3;3;1	4;3;3;3;3;3;1	4;3;3;3;3;3;1	Tumor protein D52	Tpd52	tr|E9PUA7|E9PUA7_MOUSE Tumor protein D52 OS=Mus musculus OX=10090 GN=Tpd52 PE=1 SV=1;tr|D3Z637|D3Z637_MOUSE MCG10134, isoform CRA_c OS=Mus musculus OX=10090 GN=Tpd52 PE=1 SV=1;tr|D3Z125|D3Z125_MOUSE Tumor protein D52 (Fragment) OS=Mus musculus OX=10090 GN=	7	4	4	4	3	2	2	3	3	2	2	3	3	2	2	3	25.8	25.8	25.8	21.133	194	194;162;179;206;247;224;77	0	20.504	By MS/MS	By MS/MS	By MS/MS	By MS/MS	0.36323	0.5069	14.351	11	1	Leave out requantified	0.44569	0.34288	0.38744	0.38611	0.62975	0.57689	0.56072	0.4719
E9PUD2;Q8K1M6;A0A2U3TZ67	E9PUD2;Q8K1M6;A0A2U3TZ67	11;11;9	11;11;9	11;11;9	Dynamin-1-like protein	Dnm1l	tr|E9PUD2|E9PUD2_MOUSE Dynamin-1-like protein OS=Mus musculus OX=10090 GN=Dnm1l PE=1 SV=1;sp|Q8K1M6|DNM1L_MOUSE Dynamin-1-like protein OS=Mus musculus OX=10090 GN=Dnm1l PE=1 SV=2;tr|A0A2U3TZ67|A0A2U3TZ67_MOUSE Dynamin-1-like protein OS=Mus musculus OX=1009	3	11	11	11	7	7	6	5	7	7	6	5	7	7	6	5	17.8	17.8	17.8	79.532	712	712;742;587	0	28.443	By MS/MS	By MS/MS	By MS/MS	By MS/MS	0.71794	1.0207	5.3819	21	9	Leave out requantified	0.71502	0.64012	0.72087	0.83911	1.0114	1.1031	1.0226	1.0019
E9PUF4;E9Q640;E9PYZ7;Q6NZN0;Q5SFM8	E9PUF4;E9Q640;E9PYZ7;Q6NZN0;Q5SFM8	1;1;1;1;1	1;1;1;1;1	1;1;1;1;1	RNA-binding protein 26;RNA-binding protein 27	Rbm26;Rbm27	tr|E9PUF4|E9PUF4_MOUSE RNA-binding protein 26 OS=Mus musculus OX=10090 GN=Rbm26 PE=1 SV=1;tr|E9Q640|E9Q640_MOUSE RNA-binding protein 26 OS=Mus musculus OX=10090 GN=Rbm26 PE=1 SV=1;tr|E9PYZ7|E9PYZ7_MOUSE RNA-binding protein 26 OS=Mus musculus OX=10090 GN=Rb	5	1	1	1	1	0	0	0	1	0	0	0	1	0	0	0	1.2	1.2	1.2	111.01	983	983;1001;1009;1012;1060	0.0030318	2.0706	By MS/MS				NaN	NaN	NaN	0	0	Median	NaN	NaN	NaN	NaN	NaN	NaN	NaN	NaN
Z4YJU8;E9PUQ5;Q921M4	Z4YJU8;E9PUQ5;Q921M4	2;2;2	2;2;2	2;2;2	Golgin subfamily A member 2	Golga2	tr|Z4YJU8|Z4YJU8_MOUSE Golgin subfamily A member 2 (Fragment) OS=Mus musculus OX=10090 GN=Golga2 PE=1 SV=2;tr|E9PUQ5|E9PUQ5_MOUSE Golgin subfamily A member 2 OS=Mus musculus OX=10090 GN=Golga2 PE=1 SV=1;sp|Q921M4|GOGA2_MOUSE Golgin subfamily A member 2 OS=	3	2	2	2	0	1	0	2	0	1	0	2	0	1	0	2	2.2	2.2	2.2	108.69	956	956;1026;999	0	3.9109		By MS/MS		By MS/MS	NaN	NaN	NaN	1	1	Median	NaN	NaN	NaN	NaN	NaN	NaN	NaN	NaN
E9PUT1;Q91YM4;Q5SWP0;Q5SWP1	E9PUT1;Q91YM4;Q5SWP0;Q5SWP1	2;2;1;1	2;2;1;1	2;2;1;1	Protein TBRG4	Tbrg4	tr|E9PUT1|E9PUT1_MOUSE FAST kinase domain-containing protein 4 OS=Mus musculus OX=10090 GN=Tbrg4 PE=1 SV=1;sp|Q91YM4|FAKD4_MOUSE FAST kinase domain-containing protein 4 OS=Mus musculus OX=10090 GN=Tbrg4 PE=1 SV=1;tr|Q5SWP0|Q5SWP0_MOUSE FAST kinase domain-c	4	2	2	2	1	1	1	1	1	1	1	1	1	1	1	1	10.4	10.4	10.4	41.501	365	365;630;112;158	0	3.3975	By MS/MS	By MS/MS	By MS/MS	By MS/MS	0.20799	0.27372	179.46	2	2	Median	NaN	NaN	NaN	NaN	NaN	NaN	NaN	NaN
E9PUZ5;E9QAC6;Q62083	E9PUZ5;E9QAC6;Q62083	1;1;1	1;1;1	1;1;1	Galectin;PRKCA-binding protein	Pick1	tr|E9PUZ5|E9PUZ5_MOUSE PRKCA-binding protein OS=Mus musculus OX=10090 GN=Pick1 PE=1 SV=1;tr|E9QAC6|E9QAC6_MOUSE Galectin OS=Mus musculus OX=10090 GN=Pick1 PE=1 SV=1;sp|Q62083|PICK1_MOUSE PRKCA-binding protein OS=Mus musculus OX=10090 GN=Pick1 PE=1 SV=2	3	1	1	1	1	0	0	1	1	0	0	1	1	0	0	1	2.9	2.9	2.9	46.526	416	416;530;416	0.0043838	1.8359	By MS/MS			By MS/MS	NaN	NaN	NaN	1	1	Median	NaN	NaN	NaN	NaN	NaN	NaN	NaN	NaN
E9PV12;G3X914;Q9D5V5;E9Q6Z0	E9PV12;G3X914;Q9D5V5;E9Q6Z0	2;2;2;1	2;2;2;1	2;2;2;1	Cullin-5	Cul5	tr|E9PV12|E9PV12_MOUSE Cullin-5 OS=Mus musculus OX=10090 GN=Cul5 PE=1 SV=1;tr|G3X914|G3X914_MOUSE Cullin-5 OS=Mus musculus OX=10090 GN=Cul5 PE=1 SV=1;sp|Q9D5V5|CUL5_MOUSE Cullin-5 OS=Mus musculus OX=10090 GN=Cul5 PE=1 SV=3;tr|E9Q6Z0|E9Q6Z0_MOUSE Cullin-5 O	4	2	2	2	1	2	1	1	1	2	1	1	1	2	1	1	2.3	2.3	2.3	95.85	828	828;855;780;651	0	3.9616	By MS/MS	By MS/MS	By MS/MS	By MS/MS	0.51642	0.633	44.789	5	5	Median	NaN	0.35311	NaN	NaN	NaN	0.50155	NaN	NaN
E9PV22;Q505F5	E9PV22;Q505F5	8;8	8;8	8;8	Leucine-rich repeat-containing protein 47	Lrrc47	tr|E9PV22|E9PV22_MOUSE Leucine-rich repeat-containing protein 47 OS=Mus musculus OX=10090 GN=Lrrc47 PE=1 SV=1;sp|Q505F5|LRC47_MOUSE Leucine-rich repeat-containing protein 47 OS=Mus musculus OX=10090 GN=Lrrc47 PE=1 SV=1	2	8	8	8	1	6	6	3	1	6	6	3	1	6	6	3	19.6	19.6	19.6	65.903	603	603;581	0	22.545	By MS/MS	By MS/MS	By MS/MS	By MS/MS	0.091269	0.10881	98.901	13	12	Median	NaN	0.070975	0.088054	1.1433	NaN	0.084619	0.097912	1.3921
E9PV44;O35143	E9PV44;O35143	2;2	2;2	2;2	ATPase inhibitor, mitochondrial	Atpif1	tr|E9PV44|E9PV44_MOUSE ATPase inhibitor, mitochondrial OS=Mus musculus OX=10090 GN=Atpif1 PE=1 SV=1;sp|O35143|ATIF1_MOUSE ATPase inhibitor, mitochondrial OS=Mus musculus OX=10090 GN=ATP5IF1 PE=1 SV=2	2	2	2	2	1	1	2	2	1	1	2	2	1	1	2	2	23	23	23	8.7887	74	74;106	0	3.4708	By MS/MS	By MS/MS	By MS/MS	By MS/MS	0.12729	0.16218	74.355	4	4	Median	NaN	NaN	0.13558	NaN	NaN	NaN	0.16218	NaN
E9PVA8	E9PVA8	47	47	47		Gcn1l1	sp|E9PVA8|GCN1_MOUSE eIF-2-alpha kinase activator GCN1 OS=Mus musculus OX=10090 GN=Gcn1 PE=1 SV=1	1	47	47	47	29	33	33	33	29	33	33	33	29	33	33	33	23.3	23.3	23.3	293.02	2671	2671	0	107.53	By MS/MS	By MS/MS	By MS/MS	By MS/MS	0.82557	1.1203	20.339	112	59	Leave out requantified	0.81943	0.65243	0.8056	0.916	1.149	1.0849	1.156	1.1245
E9PVC6;E9Q9E1;Q6NZJ6;A0A0J9YUS5;E9PVC5;A0A0J9YVC1;A0A0J9YUC1;E9Q770;A0A0J9YU44;A0A0J9YUL1;A0A0J9YTV0;D3YWY7;D3YWM1;D3Z439	E9PVC6;E9Q9E1;Q6NZJ6;A0A0J9YUS5;E9PVC5;A0A0J9YVC1;A0A0J9YUC1	19;19;19;18;18;10;10;9;1;1;1;1;1;1	19;19;19;18;18;10;10;9;1;1;1;1;1;1	17;17;17;16;16;8;8;7;1;1;1;1;1;1	Eukaryotic translation initiation factor 4 gamma 1	Eif4g1	tr|E9PVC6|E9PVC6_MOUSE Eukaryotic translation initiation factor 4 gamma 1 OS=Mus musculus OX=10090 GN=Eif4g1 PE=1 SV=1;tr|E9Q9E1|E9Q9E1_MOUSE Eukaryotic translation initiation factor 4 gamma 1 OS=Mus musculus OX=10090 GN=Eif4g1 PE=1 SV=1;sp|Q6NZJ6|IF4G1_MO	14	19	19	17	10	11	14	12	10	11	14	12	8	10	12	10	14.6	14.6	13.7	171.28	1553	1553;1593;1600;1303;1594;795;900;958;119;129;137;170;202;209	0	57.423	By MS/MS	By MS/MS	By MS/MS	By MS/MS	0.86479	1.1791	19.626	36	13	Leave out requantified	0.85588	0.76569	0.80567	0.94364	1.2058	1.2817	1.1678	1.1554
E9PVX6	E9PVX6	2	2	2		Mki67	sp|E9PVX6|KI67_MOUSE Proliferation marker protein Ki-67 OS=Mus musculus OX=10090 GN=Mki67 PE=1 SV=1	1	2	2	2	2	2	2	2	2	2	2	2	2	2	2	2	0.8	0.8	0.8	350.86	3177	3177	0	4.4775	By MS/MS	By MS/MS	By MS/MS	By MS/MS	0.67213	1.0086	16.364	8	4	Median	0.64989	0.74553	0.69058	0.75765	0.91237	1.057	0.8761	0.94231
Q3TF41;Q8BSH9;E9PW66;P28656	Q3TF41;Q8BSH9;E9PW66;P28656	8;8;8;8	8;8;8;8	7;7;7;7	Nucleosome assembly protein 1-like 1	Nap1l1	tr|Q3TF41|Q3TF41_MOUSE Nucleosome assembly protein 1-like 1 OS=Mus musculus OX=10090 GN=Nap1l1 PE=1 SV=1;tr|Q8BSH9|Q8BSH9_MOUSE Nucleosome assembly protein 1-like 1 OS=Mus musculus OX=10090 GN=Nap1l1 PE=1 SV=1;tr|E9PW66|E9PW66_MOUSE Nucleosome assembly pro	4	8	8	7	5	6	6	5	5	6	6	5	4	6	5	5	25.8	25.8	23.1	42.732	368	368;383;418;391	0	63.081	By MS/MS	By MS/MS	By MS/MS	By MS/MS	0.71234	1.0505	5.7732	29	14	Leave out requantified	0.70731	0.64333	0.71234	0.75907	1.0006	1.0838	1.0298	0.94097
F7D6P2;E9PW99;F8WJ43;P46662	F7D6P2;E9PW99;F8WJ43;P46662	1;1;1;1	1;1;1;1	1;1;1;1	Merlin	Nf2	tr|F7D6P2|F7D6P2_MOUSE Merlin (Fragment) OS=Mus musculus OX=10090 GN=Nf2 PE=1 SV=1;tr|E9PW99|E9PW99_MOUSE Merlin (Fragment) OS=Mus musculus OX=10090 GN=Nf2 PE=1 SV=1;tr|F8WJ43|F8WJ43_MOUSE Merlin (Fragment) OS=Mus musculus OX=10090 GN=Nf2 PE=1 SV=1;sp|P466	4	1	1	1	0	0	1	0	0	0	1	0	0	0	1	0	10.1	10.1	10.1	18.807	159	159;251;521;596	0.0066288	1.6637			By MS/MS		NaN	NaN	NaN	1	0	Median	NaN	NaN	NaN	NaN	NaN	NaN	NaN	NaN
H7BXB1;E9Q4G7;E9PWB2;Q8BK63;E9Q2U6;E9Q3W1	H7BXB1;E9Q4G7;E9PWB2;Q8BK63;E9Q2U6;E9Q3W1	2;2;2;2;1;1	2;2;2;2;1;1	2;2;2;2;1;1	Casein kinase I isoform alpha	Csnk1a1	tr|H7BXB1|H7BXB1_MOUSE Casein kinase I isoform alpha OS=Mus musculus OX=10090 GN=Csnk1a1 PE=1 SV=1;tr|E9Q4G7|E9Q4G7_MOUSE Casein kinase I isoform alpha OS=Mus musculus OX=10090 GN=Csnk1a1 PE=1 SV=1;tr|E9PWB2|E9PWB2_MOUSE Casein kinase I isoform alpha OS=Mu	6	2	2	2	0	0	1	1	0	0	1	1	0	0	1	1	6.6	6.6	6.6	38.559	334	334;336;374;337;353;365	0.0070888	1.6361			By MS/MS	By MS/MS	0.078689	0.092377	328.82	2	1	Median	NaN	NaN	NaN	NaN	NaN	NaN	NaN	NaN
E9PWE8;Q3TT92;Q62188;D3YUS0;D3Z567	E9PWE8;Q3TT92;Q62188	20;19;19;6;3	20;19;19;6;3	18;17;17;4;3	Dihydropyrimidinase-related protein 3	Dpysl3	tr|E9PWE8|E9PWE8_MOUSE Dihydropyrimidinase-related protein 3 OS=Mus musculus OX=10090 GN=Dpysl3 PE=1 SV=1;tr|Q3TT92|Q3TT92_MOUSE Dihydropyrimidinase-related protein 3 OS=Mus musculus OX=10090 GN=Dpysl3 PE=1 SV=1;sp|Q62188|DPYL3_MOUSE Dihydropyrimidinase-re	5	20	20	18	16	17	15	17	16	17	15	17	15	15	14	16	41.9	41.9	38.5	73.884	683	683;568;570;216;103	0	158.72	By MS/MS	By MS/MS	By MS/MS	By MS/MS	0.4844	0.70375	18.385	80	42	Leave out requantified	0.48676	0.42658	0.45896	0.54493	0.68034	0.72275	0.6665	0.66825
E9PWG6	E9PWG6	5	5	5		Ncapg	tr|E9PWG6|E9PWG6_MOUSE Non-SMC condensin I complex, subunit G OS=Mus musculus OX=10090 GN=Ncapg PE=1 SV=1	1	5	5	5	3	1	2	4	3	1	2	4	3	1	2	4	5.7	5.7	5.7	112.87	1004	1004	0	8.6062	By MS/MS	By matching	By MS/MS	By MS/MS	0.73605	0.97908	46.019	7	2	Leave out requantified	0.96967	NaN	NaN	1.0502	1.3901	NaN	NaN	1.2663
E9PWH6;Q8BQM4	E9PWH6;Q8BQM4	1;1	1;1	1;1	HEAT repeat-containing protein 3	Heatr3	tr|E9PWH6|E9PWH6_MOUSE HEAT repeat-containing protein 3 OS=Mus musculus OX=10090 GN=Heatr3 PE=1 SV=1;sp|Q8BQM4|HEAT3_MOUSE HEAT repeat-containing protein 3 OS=Mus musculus OX=10090 GN=Heatr3 PE=1 SV=1	2	1	1	1	0	0	0	1	0	0	0	1	0	0	0	1	2.3	2.3	2.3	61.889	562	562;679	0.0010621	2.4905				By MS/MS	NaN	NaN	NaN	1	1	Median	NaN	NaN	NaN	NaN	NaN	NaN	NaN	NaN
F6YTS6;E9PWK1;Q9D379	F6YTS6;E9PWK1;Q9D379	1;1;1	1;1;1	1;1;1	Epoxide hydrolase 1	Ephx1	tr|F6YTS6|F6YTS6_MOUSE Epoxide hydrolase 1 (Fragment) OS=Mus musculus OX=10090 GN=Ephx1 PE=1 SV=2;tr|E9PWK1|E9PWK1_MOUSE Epoxide hydrolase OS=Mus musculus OX=10090 GN=Ephx1 PE=1 SV=1;sp|Q9D379|HYEP_MOUSE Epoxide hydrolase 1 OS=Mus musculus OX=10090 GN=Ephx	3	1	1	1	1	1	1	1	1	1	1	1	1	1	1	1	3.6	3.6	3.6	27.929	247	247;441;455	0.0010684	2.5427	By matching	By matching	By MS/MS	By MS/MS	0.64304	0.62233	58.358	4	0	Linear	NaN	NaN	NaN	NaN	NaN	NaN	NaN	NaN
E9PWY9;Q8C0C7;D6RIJ2	E9PWY9;Q8C0C7	7;7;2	7;7;2	7;7;2	Phenylalanine--tRNA ligase alpha subunit	Farsa	tr|E9PWY9|E9PWY9_MOUSE Phenylalanine--tRNA ligase alpha subunit OS=Mus musculus OX=10090 GN=Farsa PE=1 SV=1;sp|Q8C0C7|SYFA_MOUSE Phenylalanine--tRNA ligase alpha subunit OS=Mus musculus OX=10090 GN=Farsa PE=1 SV=1	3	7	7	7	4	4	4	7	4	4	4	7	4	4	4	7	19.1	19.1	19.1	57.47	507	507;508;105	0	30.747	By MS/MS	By MS/MS	By MS/MS	By MS/MS	0.57977	0.83852	4.756	15	3	Leave out requantified	0.6136	0.48889	0.54781	0.70862	0.84498	0.82306	0.79353	0.85129
F7BWC1;E9PX65;Q8BYL4	F7BWC1;E9PX65;Q8BYL4	1;1;1	1;1;1	1;1;1	Tyrosine--tRNA ligase;Tyrosine--tRNA ligase, mitochondrial	Yars2	tr|F7BWC1|F7BWC1_MOUSE Tyrosine--tRNA ligase, mitochondrial (Fragment) OS=Mus musculus OX=10090 GN=Yars2 PE=1 SV=8;tr|E9PX65|E9PX65_MOUSE Tyrosine--tRNA ligase OS=Mus musculus OX=10090 GN=Yars2 PE=1 SV=1;sp|Q8BYL4|SYYM_MOUSE Tyrosine--tRNA ligase, mitochon	3	1	1	1	0	1	1	1	0	1	1	1	0	1	1	1	9.6	9.6	9.6	14.105	125	125;349;472	0.0025419	2.1169		By MS/MS	By MS/MS	By MS/MS	NaN	NaN	NaN	0	0	Median	NaN	NaN	NaN	NaN	NaN	NaN	NaN	NaN
E9Q1Q0;E9Q585;E9PX68	E9Q1Q0;E9Q585;E9PX68	1;1;1	1;1;1	1;1;1		Slc4a1ap	tr|E9Q1Q0|E9Q1Q0_MOUSE Solute carrier family 4 (anion exchanger), member 1, adaptor protein OS=Mus musculus OX=10090 GN=Slc4a1ap PE=1 SV=1;tr|E9Q585|E9Q585_MOUSE Solute carrier family 4 (anion exchanger), member 1, adaptor protein OS=Mus musculus OX=10090	3	1	1	1	1	0	0	1	1	0	0	1	1	0	0	1	1.7	1.7	1.7	59.409	534	534;715;744	0.0015798	2.4199	By MS/MS			By MS/MS	NaN	NaN	NaN	0	0	Median	NaN	NaN	NaN	NaN	NaN	NaN	NaN	NaN
E9PYH1;G5E8X4;E9PZX8;E9PXA4;Q9DB82;P61600	E9PYH1;G5E8X4;E9PZX8;E9PXA4;Q9DB82;P61600	1;1;1;1;1;1	1;1;1;1;1;1	1;1;1;1;1;1	N-alpha-acetyltransferase 20	Naa20	tr|E9PYH1|E9PYH1_MOUSE N-alpha-acetyltransferase 20 OS=Mus musculus OX=10090 GN=Naa20 PE=4 SV=1;tr|G5E8X4|G5E8X4_MOUSE N-acetyltransferase 5 (ARD1 homolog, S. cerevisiae), isoform CRA_e OS=Mus musculus OX=10090 GN=Naa20 PE=4 SV=1;tr|E9PZX8|E9PZX8_MOUSE N-a	6	1	1	1	1	0	0	0	1	0	0	0	1	0	0	0	25	25	25	4.1026	36	36;61;73;111;188;178	0.0057334	1.7126	By MS/MS				NaN	NaN	NaN	0	0	Median	NaN	NaN	NaN	NaN	NaN	NaN	NaN	NaN
F8VPX1;E9PXY8;Q6A4J8;G3UWR8	F8VPX1;E9PXY8;Q6A4J8	7;7;7;3	7;7;7;3	7;7;7;3	Ubiquitin carboxyl-terminal hydrolase;Ubiquitin carboxyl-terminal hydrolase 7	Usp7	tr|F8VPX1|F8VPX1_MOUSE Ubiquitin carboxyl-terminal hydrolase 7 OS=Mus musculus OX=10090 GN=Usp7 PE=1 SV=1;tr|E9PXY8|E9PXY8_MOUSE Ubiquitin carboxyl-terminal hydrolase 7 OS=Mus musculus OX=10090 GN=Usp7 PE=1 SV=1;sp|Q6A4J8|UBP7_MOUSE Ubiquitin carboxyl-term	4	7	7	7	4	5	3	2	4	5	3	2	4	5	3	2	7.6	7.6	7.6	128.47	1103	1103;1143;1103;327	0	14.163	By MS/MS	By MS/MS	By MS/MS	By MS/MS	0.53314	0.69792	104.75	6	6	Median	NaN	0.49004	0.19463	NaN	NaN	0.58425	0.24606	NaN
E9PYF1;Q8VCT3	E9PYF1;Q8VCT3	1;1	1;1	1;1	Aminopeptidase B	Rnpep	tr|E9PYF1|E9PYF1_MOUSE Aminopeptidase B OS=Mus musculus OX=10090 GN=Rnpep PE=1 SV=1;sp|Q8VCT3|AMPB_MOUSE Aminopeptidase B OS=Mus musculus OX=10090 GN=Rnpep PE=1 SV=2	2	1	1	1	1	1	1	1	1	1	1	1	1	1	1	1	1.6	1.6	1.6	68.002	611	611;650	0	5.7627	By MS/MS	By MS/MS	By MS/MS	By MS/MS	0.072635	0.096925	1.8117	2	2	Median	NaN	NaN	NaN	NaN	NaN	NaN	NaN	NaN
E9PYG9;F6TVP2;Q60710	E9PYG9;F6TVP2;Q60710	3;3;3	3;3;3	3;3;3	Deoxynucleoside triphosphate triphosphohydrolase SAMHD1	Samhd1	tr|E9PYG9|E9PYG9_MOUSE Deoxynucleoside triphosphate triphosphohydrolase SAMHD1 OS=Mus musculus OX=10090 GN=Samhd1 PE=1 SV=1;tr|F6TVP2|F6TVP2_MOUSE Deoxynucleoside triphosphate triphosphohydrolase SAMHD1 (Fragment) OS=Mus musculus OX=10090 GN=Samhd1 PE=1 SV	3	3	3	3	2	1	1	1	2	1	1	1	2	1	1	1	7.6	7.6	7.6	67.245	582	582;631;658	0	4.2682	By MS/MS	By MS/MS	By MS/MS	By MS/MS	0.56647	0.7265	72.149	2	1	Median	NaN	NaN	NaN	NaN	NaN	NaN	NaN	NaN
E9PYH2;Q91V12	E9PYH2;Q91V12	8;8	8;8	8;8	Cytosolic acyl coenzyme A thioester hydrolase	Acot7	tr|E9PYH2|E9PYH2_MOUSE Cytosolic acyl coenzyme A thioester hydrolase OS=Mus musculus OX=10090 GN=Acot7 PE=1 SV=1;sp|Q91V12|BACH_MOUSE Cytosolic acyl coenzyme A thioester hydrolase OS=Mus musculus OX=10090 GN=Acot7 PE=1 SV=2	2	8	8	8	5	4	6	3	5	4	6	3	5	4	6	3	21.9	21.9	21.9	42.826	384	384;381	0	48.786	By MS/MS	By MS/MS	By MS/MS	By MS/MS	0.5699	0.84857	2.0046	16	8	Leave out requantified	0.32727	0.46071	0.31231	0.67325	0.45891	0.8005	0.39874	0.83269
E9PYI8;Q9JMA1	E9PYI8;Q9JMA1	8;8	8;8	8;8	Ubiquitin carboxyl-terminal hydrolase;Ubiquitin carboxyl-terminal hydrolase 14	Usp14	tr|E9PYI8|E9PYI8_MOUSE Ubiquitin carboxyl-terminal hydrolase 14 OS=Mus musculus OX=10090 GN=Usp14 PE=1 SV=1;sp|Q9JMA1|UBP14_MOUSE Ubiquitin carboxyl-terminal hydrolase 14 OS=Mus musculus OX=10090 GN=Usp14 PE=1 SV=3	2	8	8	8	4	8	5	4	4	8	5	4	4	8	5	4	18.8	18.8	18.8	52.318	458	458;493	0	30.19	By MS/MS	By MS/MS	By MS/MS	By MS/MS	0.6942	0.99341	127.34	14	10	Median	0.70881	0.48366	0.6799	0.89189	1.0189	0.68967	0.96858	1.09
E9PYL9;Q9CXW4;A2BH06;E9PZB3	E9PYL9;Q9CXW4;A2BH06;E9PZB3	7;7;6;5	7;7;6;5	7;7;6;5	60S ribosomal protein L11	Gm10036;Rpl11;Gm5093	tr|E9PYL9|E9PYL9_MOUSE Uncharacterized protein OS=Mus musculus OX=10090 GN=Gm10036 PE=3 SV=1;sp|Q9CXW4|RL11_MOUSE 60S ribosomal protein L11 OS=Mus musculus OX=10090 GN=Rpl11 PE=1 SV=4;tr|A2BH06|A2BH06_MOUSE 60S ribosomal protein L11 (Fragment) OS=Mus muscu	4	7	7	7	5	4	4	3	5	4	4	3	5	4	4	3	39.3	39.3	39.3	20.266	178	178;178;172;174	0	32.063	By MS/MS	By MS/MS	By MS/MS	By MS/MS	0.67862	0.9602	1.8589	19	9	Leave out requantified	0.67746	0.52753	0.65417	0.75415	0.95224	0.87824	0.9463	0.93862
E9PYX7;E9Q852;E9Q9C3;Q9QZQ1	E9PYX7;E9Q852;E9Q9C3;Q9QZQ1	1;1;1;1	1;1;1;1	1;1;1;1	Afadin	Mllt4	tr|E9PYX7|E9PYX7_MOUSE Afadin OS=Mus musculus OX=10090 GN=Afdn PE=1 SV=1;tr|E9Q852|E9Q852_MOUSE Afadin OS=Mus musculus OX=10090 GN=Afdn PE=1 SV=2;tr|E9Q9C3|E9Q9C3_MOUSE Afadin OS=Mus musculus OX=10090 GN=Afdn PE=1 SV=1;sp|Q9QZQ1|AFAD_MOUSE Afadin OS=Mus mu	4	1	1	1	1	0	1	1	1	0	1	1	1	0	1	1	1.1	1.1	1.1	188.9	1663	1663;1805;1827;1820	0	2.9017	By MS/MS		By MS/MS	By MS/MS	NaN	NaN	NaN	0	0	Median	NaN	NaN	NaN	NaN	NaN	NaN	NaN	NaN
E9PZ00;Q8BFQ1;K3W4L3;J3QPG5;Q61207	E9PZ00;Q8BFQ1;K3W4L3;J3QPG5;Q61207	4;4;4;4;4	4;4;4;4;4	4;4;4;4;4	Prosaposin	Psap	tr|E9PZ00|E9PZ00_MOUSE Prosaposin OS=Mus musculus OX=10090 GN=Psap PE=1 SV=1;tr|Q8BFQ1|Q8BFQ1_MOUSE Prosaposin OS=Mus musculus OX=10090 GN=Psap PE=1 SV=1;tr|K3W4L3|K3W4L3_MOUSE Prosaposin OS=Mus musculus OX=10090 GN=Psap PE=1 SV=1;tr|J3QPG5|J3QPG5_MOUSE Pr	5	4	4	4	3	4	4	4	3	4	4	4	3	4	4	4	10	10	10	60.672	551	551;554;556;557;557	0	15.548	By MS/MS	By MS/MS	By MS/MS	By MS/MS	0.56948	0.80625	18.997	15	8	Leave out requantified	0.55631	0.27091	0.18159	0.68869	0.7821	0.38254	0.23125	0.86357
E9PZ69;P58021	E9PZ69;P58021	1;1	1;1	1;1	Transmembrane 9 superfamily member 2	Tm9sf2	tr|E9PZ69|E9PZ69_MOUSE Transmembrane 9 superfamily member OS=Mus musculus OX=10090 GN=Tm9sf2 PE=1 SV=1;sp|P58021|TM9S2_MOUSE Transmembrane 9 superfamily member 2 OS=Mus musculus OX=10090 GN=Tm9sf2 PE=1 SV=1	2	1	1	1	0	0	0	1	0	0	0	1	0	0	0	1	2.8	2.8	2.8	56.322	497	497;662	0	3.844				By MS/MS	NaN	NaN	NaN	1	1	Median	NaN	NaN	NaN	NaN	NaN	NaN	NaN	NaN
E9PZC3;Q923D2;E9PZC4;A0A0U1RPU7	E9PZC3;Q923D2;E9PZC4	4;4;3;1	4;4;3;1	4;4;3;1	Flavin reductase (NADPH)	Blvrb	tr|E9PZC3|E9PZC3_MOUSE Flavin reductase (NADPH) OS=Mus musculus OX=10090 GN=Blvrb PE=1 SV=1;sp|Q923D2|BLVRB_MOUSE Flavin reductase (NADPH) OS=Mus musculus OX=10090 GN=Blvrb PE=1 SV=3;tr|E9PZC4|E9PZC4_MOUSE Flavin reductase (NADPH) OS=Mus musculus OX=10090	4	4	4	4	2	4	4	3	2	4	4	3	2	4	4	3	19.4	19.4	19.4	26.647	247	247;206;120;126	0	12.003	By MS/MS	By MS/MS	By MS/MS	By MS/MS	0.22409	0.27556	135.57	8	4	Median	NaN	0.065619	0.46907	NaN	NaN	0.078233	0.65237	NaN
E9PZF0;Q01768;Q5NC79	E9PZF0;Q01768	8;5;3	8;5;3	3;3;0	Nucleoside diphosphate kinase;Nucleoside diphosphate kinase B	Gm20390;Nme2	tr|E9PZF0|E9PZF0_MOUSE Nucleoside diphosphate kinase OS=Mus musculus OX=10090 GN=Gm20390 PE=3 SV=1;sp|Q01768|NDKB_MOUSE Nucleoside diphosphate kinase B OS=Mus musculus OX=10090 GN=Nme2 PE=1 SV=1	3	8	8	3	4	4	7	3	4	4	7	3	1	3	3	1	46.4	46.4	14.2	30.2	267	267;152;117	0	52.788	By MS/MS	By MS/MS	By MS/MS	By MS/MS	0.73863	1.0469	141.86	20	4	Leave out requantified	0.69815	0.64139	0.69916	0.75279	0.98733	1.0601	1.0277	0.93565
E9Q5H2;E9PZF5;P97822	E9Q5H2;E9PZF5;P97822	4;4;4	4;4;4	4;4;4	Acidic leucine-rich nuclear phosphoprotein 32 family member E	Anp32e	tr|E9Q5H2|E9Q5H2_MOUSE Acidic leucine-rich nuclear phosphoprotein 32 family member E (Fragment) OS=Mus musculus OX=10090 GN=Anp32e PE=1 SV=1;tr|E9PZF5|E9PZF5_MOUSE Acidic leucine-rich nuclear phosphoprotein 32 family member E (Fragment) OS=Mus musculus OX=	3	4	4	4	4	2	4	4	4	2	4	4	4	2	4	4	41.1	41.1	41.1	12.078	107	107;171;260	0	35.087	By MS/MS	By MS/MS	By MS/MS	By MS/MS	0.75518	1.0152	12.187	21	7	Leave out requantified	0.71873	0.76228	0.7642	0.78719	0.99526	1.2955	1.1366	0.96907
E9Q9E4;E9PZX7;P30285;D3YWB0;D6RHS5	E9Q9E4;E9PZX7;P30285;D3YWB0;D6RHS5	6;6;6;4;3	6;6;6;4;3	6;6;6;4;3	Cyclin-dependent kinase 4	Cdk4	tr|E9Q9E4|E9Q9E4_MOUSE Cyclin-dependent kinase 4 (Fragment) OS=Mus musculus OX=10090 GN=Cdk4 PE=1 SV=1;tr|E9PZX7|E9PZX7_MOUSE Cyclin-dependent kinase 4 (Fragment) OS=Mus musculus OX=10090 GN=Cdk4 PE=1 SV=1;sp|P30285|CDK4_MOUSE Cyclin-dependent kinase 4 OS=	5	6	6	6	3	3	4	4	3	3	4	4	3	3	4	4	28.1	28.1	28.1	28.021	253	253;271;303;158;74	0	16.585	By MS/MS	By MS/MS	By MS/MS	By MS/MS	0.049669	0.055001	126.48	6	6	Median	NaN	0.017258	0.1051	NaN	NaN	0.020575	0.11566	NaN
E9Q035;P47758;A0A1W2P830;F7CJN9;Q921I1	E9Q035;P47758	3;2;1;1;1	2;2;1;0;0	2;2;1;0;0	Signal recognition particle receptor subunit beta	Gm20425;Srprb	tr|E9Q035|E9Q035_MOUSE Uncharacterized protein OS=Mus musculus OX=10090 GN=Gm20425 PE=4 SV=1;sp|P47758|SRPRB_MOUSE Signal recognition particle receptor subunit beta OS=Mus musculus OX=10090 GN=Srprb PE=1 SV=1	5	3	2	2	3	3	3	3	2	2	2	2	2	2	2	2	2.8	1.8	1.8	107.8	978	978;269;54;249;697	0	6.5693	By MS/MS	By MS/MS	By MS/MS	By MS/MS	0.64783	0.9176	18.958	9	2	Leave out requantified	0.6721	0.50282	0.64809	0.73693	0.94691	0.85337	0.93676	0.90187
F6QYF8;E9Q039;Q11011;E9Q6F4	F6QYF8;E9Q039;Q11011;E9Q6F4	2;2;2;1	2;2;2;1	2;2;2;1	Puromycin-sensitive aminopeptidase	Npepps	tr|F6QYF8|F6QYF8_MOUSE Aminopeptidase (Fragment) OS=Mus musculus OX=10090 GN=Npepps PE=1 SV=1;tr|E9Q039|E9Q039_MOUSE Aminopeptidase OS=Mus musculus OX=10090 GN=Npepps PE=1 SV=1;sp|Q11011|PSA_MOUSE Puromycin-sensitive aminopeptidase OS=Mus musculus OX=10090	4	2	2	2	1	2	1	1	1	2	1	1	1	2	1	1	2.9	2.9	2.9	98.409	876	876;889;920;674	0	5.4606	By MS/MS	By MS/MS	By matching	By matching	0.74874	1.08	89.299	5	1	Median	NaN	0.28704	NaN	NaN	NaN	0.40472	NaN	NaN
E9Q055;E9Q2R6;E9Q197;Q9CPV4	E9Q055;E9Q2R6;E9Q197;Q9CPV4	1;1;1;1	1;1;1;1	1;1;1;1	Glyoxalase domain-containing protein 4	Glod4	tr|E9Q055|E9Q055_MOUSE Glyoxalase domain-containing protein 4 OS=Mus musculus OX=10090 GN=Glod4 PE=1 SV=1;tr|E9Q2R6|E9Q2R6_MOUSE Glyoxalase domain-containing protein 4 OS=Mus musculus OX=10090 GN=Glod4 PE=1 SV=1;tr|E9Q197|E9Q197_MOUSE Glyoxalase domain-con	4	1	1	1	1	1	1	1	1	1	1	1	1	1	1	1	13.1	13.1	13.1	7.4005	61	61;66;279;298	0.0034791	1.9557	By MS/MS	By MS/MS	By MS/MS	By MS/MS	0.143	0.16464	39.198	4	4	Median	NaN	NaN	NaN	NaN	NaN	NaN	NaN	NaN
E9Q0G1;Q9CQJ6	E9Q0G1;Q9CQJ6	2;2	2;2	2;2	Density-regulated protein	Denr	tr|E9Q0G1|E9Q0G1_MOUSE Density-regulated protein (Fragment) OS=Mus musculus OX=10090 GN=Denr PE=1 SV=8;sp|Q9CQJ6|DENR_MOUSE Density-regulated protein OS=Mus musculus OX=10090 GN=Denr PE=1 SV=1	2	2	2	2	1	2	2	1	1	2	2	1	1	2	2	1	14.3	14.3	14.3	20.396	182	182;198	0	12.713	By matching	By MS/MS	By MS/MS	By MS/MS	0.66665	0.96917	8.4164	6	2	Median	NaN	0.59714	0.64328	NaN	NaN	1.0132	0.94102	NaN
E9Q0W8;E9Q4F4;P62305	E9Q0W8;E9Q4F4;P62305	1;1;1	1;1;1	1;1;1	Small nuclear ribonucleoprotein E	Snrpe	tr|E9Q0W8|E9Q0W8_MOUSE Small nuclear ribonucleoprotein E OS=Mus musculus OX=10090 GN=Snrpe PE=1 SV=1;tr|E9Q4F4|E9Q4F4_MOUSE Small nuclear ribonucleoprotein E OS=Mus musculus OX=10090 GN=Snrpe PE=1 SV=1;sp|P62305|RUXE_MOUSE Small nuclear ribonucleoprotein E	3	1	1	1	1	1	1	1	1	1	1	1	1	1	1	1	21.2	21.2	21.2	6.1593	52	52;91;92	0	6.2324	By MS/MS	By MS/MS	By MS/MS	By MS/MS	0.0065258	0.008708	94.911	6	6	Median	0.010112	NaN	0.0092327	NaN	0.014086	NaN	0.010266	NaN
E9Q109;Q9CXK8	E9Q109;Q9CXK8	2;2	2;2	2;2	60S ribosome subunit biogenesis protein NIP7 homolog	Nip7	tr|E9Q109|E9Q109_MOUSE 60S ribosome subunit biogenesis protein NIP7 homolog OS=Mus musculus OX=10090 GN=Nip7 PE=1 SV=1;sp|Q9CXK8|NIP7_MOUSE 60S ribosome subunit biogenesis protein NIP7 homolog OS=Mus musculus OX=10090 GN=Nip7 PE=1 SV=1	2	2	2	2	0	1	1	1	0	1	1	1	0	1	1	1	14.3	14.3	14.3	15.224	133	133;180	0	3.5102		By MS/MS	By MS/MS	By MS/MS	0.7547	1.0912	96.207	3	1	Plateau	NaN	NaN	NaN	NaN	NaN	NaN	NaN	NaN
E9Q150;E9Q967;Q61062;Q60838	E9Q150;E9Q967;Q61062;Q60838	1;1;1;1	1;1;1;1	1;1;1;1	Segment polarity protein dishevelled homolog DVL-3;Segment polarity protein dishevelled homolog DVL-2	Dvl3;Dvl2	tr|E9Q150|E9Q150_MOUSE Segment polarity protein dishevelled homolog DVL-3 OS=Mus musculus OX=10090 GN=Dvl3 PE=1 SV=1;tr|E9Q967|E9Q967_MOUSE Segment polarity protein dishevelled homolog DVL-3 OS=Mus musculus OX=10090 GN=Dvl3 PE=1 SV=1;sp|Q61062|DVL3_MOUSE S	4	1	1	1	0	1	0	0	0	1	0	0	0	1	0	0	1.7	1.7	1.7	76.323	699	699;718;716;736	0	3.3853		By MS/MS			NaN	NaN	NaN	0	0	Median	NaN	NaN	NaN	NaN	NaN	NaN	NaN	NaN
E9Q179;Q8C5Q4;D3YUN1	E9Q179;Q8C5Q4	3;3;1	3;3;1	3;3;1	G-rich sequence factor 1	Grsf1	tr|E9Q179|E9Q179_MOUSE G-rich sequence factor 1 OS=Mus musculus OX=10090 GN=Grsf1 PE=1 SV=1;sp|Q8C5Q4|GRSF1_MOUSE G-rich sequence factor 1 OS=Mus musculus OX=10090 GN=Grsf1 PE=1 SV=2	3	3	3	3	1	2	2	1	1	2	2	1	1	2	2	1	11	11	11	41.61	362	362;479;137	0	7.1099	By MS/MS	By MS/MS	By MS/MS	By MS/MS	NaN	NaN	NaN	1	1	Median	NaN	NaN	NaN	NaN	NaN	NaN	NaN	NaN
E9Q9F5;E9Q1G8;O55131;A0A0R4J233;S4R2P6;A0A1W2P6J7;Q9DA97;Q8C650	E9Q9F5;E9Q1G8;O55131	12;12;12;1;1;1;1;1	12;12;12;1;1;1;1;1	12;12;12;1;1;1;1;1	Septin-7	2022-09-07	tr|E9Q9F5|E9Q9F5_MOUSE Septin-7 OS=Mus musculus OX=10090 GN=Sept7 PE=1 SV=2;tr|E9Q1G8|E9Q1G8_MOUSE Septin-7 OS=Mus musculus OX=10090 GN=Sept7 PE=1 SV=2;sp|O55131|SEPT7_MOUSE Septin-7 OS=Mus musculus OX=10090 GN=Sept7 PE=1 SV=1	8	12	12	12	6	5	5	8	6	5	5	8	6	5	5	8	30.9	30.9	30.9	50.68	437	437;437;436;427;429;452;430;452	0	31.686	By MS/MS	By MS/MS	By MS/MS	By MS/MS	0.76226	1.0083	8.9646	16	8	Leave out requantified	0.1851	0.59639	0.71362	0.47166	0.22972	0.99319	1.0534	0.58115
E9Q1K3;F8WHZ9;F8WGR0;Q9QYC0;F6RDR0;A0A0J9YVI4	E9Q1K3;F8WHZ9;F8WGR0;Q9QYC0;F6RDR0;A0A0J9YVI4	3;3;3;3;2;2	3;3;3;3;2;2	3;3;3;3;2;2	Alpha-adducin	Add1	tr|E9Q1K3|E9Q1K3_MOUSE Alpha-adducin OS=Mus musculus OX=10090 GN=Add1 PE=1 SV=1;tr|F8WHZ9|F8WHZ9_MOUSE Alpha-adducin OS=Mus musculus OX=10090 GN=Add1 PE=1 SV=1;tr|F8WGR0|F8WGR0_MOUSE Alpha-adducin OS=Mus musculus OX=10090 GN=Add1 PE=1 SV=1;sp|Q9QYC0|ADDA_M	6	3	3	3	2	3	2	2	2	3	2	2	2	3	2	2	7.3	7.3	7.3	72.925	660	660;662;663;735;160;248	0	3.1906	By MS/MS	By MS/MS	By MS/MS	By matching	0.85358	1.2613	7.2064	8	0	Leave out requantified	0.87383	0.65915	0.83381	1.0853	1.2915	1.1374	1.2318	1.3475
E9Q1S3;Q01405	E9Q1S3;Q01405	4;4	4;4	4;4	Protein transport protein Sec23A	Sec23a	tr|E9Q1S3|E9Q1S3_MOUSE Protein transport protein Sec23A OS=Mus musculus OX=10090 GN=Sec23a PE=1 SV=1;sp|Q01405|SC23A_MOUSE Protein transport protein Sec23A OS=Mus musculus OX=10090 GN=Sec23a PE=1 SV=2	2	4	4	4	1	3	1	2	1	3	1	2	1	3	1	2	6.9	6.9	6.9	82.955	736	736;765	0	8.4602	By MS/MS	By MS/MS	By MS/MS	By MS/MS	1.7674	2.2591	175.98	3	3	Median	NaN	NaN	NaN	NaN	NaN	NaN	NaN	NaN
E9Q1Y3;E9Q414	E9Q1Y3;E9Q414	2;2	1;1	1;1	Apolipoprotein B-100;Apolipoprotein B-48	Apob	tr|E9Q1Y3|E9Q1Y3_MOUSE Apolipoprotein B-100 (Fragment) OS=Mus musculus OX=10090 GN=Apob PE=1 SV=1;sp|E9Q414|APOB_MOUSE Apolipoprotein B-100 OS=Mus musculus OX=10090 GN=Apob PE=1 SV=1	2	2	1	1	2	2	2	1	1	1	1	0	1	1	1	0	0.6	0.3	0.3	503.9	4456	4456;4505	0	3.5797	By MS/MS	By MS/MS	By MS/MS	By matching	NaN	NaN	NaN	1	1	Median	NaN	NaN	NaN	NaN	NaN	NaN	NaN	NaN
E9Q2X6;Q8CG47;A0A0A6YXY3	E9Q2X6;Q8CG47	8;8;1	8;8;1	8;8;1	Structural maintenance of chromosomes protein;Structural maintenance of chromosomes protein 4	Smc4	tr|E9Q2X6|E9Q2X6_MOUSE Structural maintenance of chromosomes protein OS=Mus musculus OX=10090 GN=Smc4 PE=1 SV=1;sp|Q8CG47|SMC4_MOUSE Structural maintenance of chromosomes protein 4 OS=Mus musculus OX=10090 GN=Smc4 PE=1 SV=1	3	8	8	8	5	4	4	4	5	4	4	4	5	4	4	4	7.8	7.8	7.8	144.21	1261	1261;1286;109	0	19.763	By MS/MS	By MS/MS	By MS/MS	By MS/MS	0.77272	1.0802	72.524	13	5	Leave out requantified	1.002	0.93775	0.78738	0.75494	1.4043	1.3406	1.0739	0.90307
E9Q317;O55128;D3YY73;D3Z2N9;D3YY55	E9Q317;O55128;D3YY73;D3Z2N9	3;3;2;2;1	3;3;2;2;1	3;3;2;2;1	Histone deacetylase complex subunit SAP18	Gm10094;Sap18	tr|E9Q317|E9Q317_MOUSE Histone deacetylase complex subunit SAP18 OS=Mus musculus OX=10090 GN=Sap18 PE=1 SV=1;sp|O55128|SAP18_MOUSE Histone deacetylase complex subunit SAP18 OS=Mus musculus OX=10090 GN=Sap18 PE=1 SV=1;tr|D3YY73|D3YY73_MOUSE Histone deacetyl	5	3	3	3	2	0	2	2	2	0	2	2	2	0	2	2	12.2	12.2	12.2	19.586	172	172;153;92;111;107	0	3.0274	By MS/MS		By MS/MS	By MS/MS	0.68576	0.89852	105.93	4	1	Median	NaN	NaN	NaN	0.26104	NaN	NaN	NaN	0.32729
E9Q3N1;Q09143;D3Z161	E9Q3N1;Q09143;D3Z161	2;2;1	2;2;1	2;2;1	High affinity cationic amino acid transporter 1	Slc7a1	tr|E9Q3N1|E9Q3N1_MOUSE High affinity cationic amino acid transporter 1 (Fragment) OS=Mus musculus OX=10090 GN=Slc7a1 PE=1 SV=8;sp|Q09143|CTR1_MOUSE High affinity cationic amino acid transporter 1 OS=Mus musculus OX=10090 GN=Slc7a1 PE=1 SV=1;tr|D3Z161|D3Z16	3	2	2	2	0	0	2	0	0	0	2	0	0	0	2	0	4.2	4.2	4.2	58.038	542	542;622;94	0	3.4431			By MS/MS		NaN	NaN	NaN	1	0	Median	NaN	NaN	NaN	NaN	NaN	NaN	NaN	NaN
G3UY29;E9Q3P9;F8WGS1;P62492;P46638;G3UZL4;G3UZD3	G3UY29;E9Q3P9;F8WGS1;P62492;P46638;G3UZL4;G3UZD3	4;4;4;4;4;2;2	4;4;4;4;4;2;2	4;4;4;4;4;2;2	Ras-related protein Rab-11A;Ras-related protein Rab-11B	Rab11b;Rab11a	tr|G3UY29|G3UY29_MOUSE MCG22989, isoform CRA_a OS=Mus musculus OX=10090 GN=Rab11b PE=4 SV=1;tr|E9Q3P9|E9Q3P9_MOUSE Ras-related protein Rab-11A OS=Mus musculus OX=10090 GN=Rab11a PE=4 SV=1;tr|F8WGS1|F8WGS1_MOUSE Ras-related protein Rab-11A (Fragment) OS=Mus	7	4	4	4	3	3	4	3	3	3	4	3	3	3	4	3	28.9	28.9	28.9	16.924	149	149;153;155;216;218;125;193	0	11.071	By MS/MS	By MS/MS	By MS/MS	By MS/MS	0.78571	1.0579	5.2677	13	4	Leave out requantified	0.74646	0.60443	0.7178	0.78571	1.042	1.0074	1.0316	0.9698
E9Q3W4;Q9QXS1;E9PW24;A0A0R4J223;E9Q9J6;A0A0R4J221;A0A0R4J218;A0A2I3BRT4;Q8R0W0	E9Q3W4;Q9QXS1	4;4;1;1;1;1;1;1;1	4;4;1;1;1;1;1;1;1	4;4;1;1;1;1;1;1;1	Plectin	Plec	tr|E9Q3W4|E9Q3W4_MOUSE Plectin OS=Mus musculus OX=10090 GN=Plec PE=1 SV=1;sp|Q9QXS1|PLEC_MOUSE Plectin OS=Mus musculus OX=10090 GN=Plec PE=1 SV=3	9	4	4	4	2	2	2	2	2	2	2	2	2	2	2	2	1.5	1.5	1.5	499.1	4386	4386;4691;499;661;676;702;964;3458;6548	0	8.7489	By MS/MS	By MS/MS	By MS/MS	By MS/MS	0.21221	0.25505	44.182	6	6	Median	NaN	0.2296	0.26103	0.14252	NaN	0.32588	0.29026	0.18217
F6Q7C7;E9Q3X4;P59438	F6Q7C7;E9Q3X4;P59438	1;1;1	1;1;1	1;1;1	Hermansky-Pudlak syndrome 5 protein homolog	Hps5	tr|F6Q7C7|F6Q7C7_MOUSE Hermansky-Pudlak syndrome 5 protein homolog (Fragment) OS=Mus musculus OX=10090 GN=Hps5 PE=1 SV=1;tr|E9Q3X4|E9Q3X4_MOUSE Hermansky-Pudlak syndrome 5 protein homolog OS=Mus musculus OX=10090 GN=Hps5 PE=1 SV=1;sp|P59438|HPS5_MOUSE Herm	3	1	1	1	1	1	1	1	1	1	1	1	1	1	1	1	2.1	2.1	2.1	59.502	534	534;1093;1126	0.0035018	1.9971	By matching	By matching	By matching	By MS/MS	1.848	2.7348	19.354	4	0	Median	NaN	NaN	NaN	NaN	NaN	NaN	NaN	NaN
E9Q411	E9Q411	1	1	1		Nbas	tr|E9Q411|E9Q411_MOUSE Neuroblastoma-amplified sequence OS=Mus musculus OX=10090 GN=Nbas PE=1 SV=1	1	1	1	1	0	0	0	1	0	0	0	1	0	0	0	1	0.4	0.4	0.4	265.77	2356	2356	0.0057307	1.7126				By MS/MS	NaN	NaN	NaN	0	0	Median	NaN	NaN	NaN	NaN	NaN	NaN	NaN	NaN
Q8BP43;E9Q450;E9Q453;G5E8R2;E9Q456;E9Q452;Q8BSH3;E9Q448;E9Q454;P58771;G5E8R0;G5E8R1;E9Q455;B7ZNL3;F8WID5;S4R2U0	Q8BP43;E9Q450;E9Q453;G5E8R2;E9Q456;E9Q452;Q8BSH3;E9Q448;E9Q454;P58771;G5E8R0;G5E8R1;E9Q455;B7ZNL3;F8WID5;S4R2U0	9;9;8;8;8;8;8;8;8;8;7;7;7;7;7;5	4;4;3;3;3;3;3;3;3;3;2;2;2;2;2;1	4;4;3;3;3;3;3;3;3;3;2;2;2;2;2;1	Tropomyosin alpha-1 chain	Tpm1	tr|Q8BP43|Q8BP43_MOUSE Tropomyosin 1, alpha, isoform CRA_c OS=Mus musculus OX=10090 GN=Tpm1 PE=1 SV=1;tr|E9Q450|E9Q450_MOUSE Tropomyosin alpha-1 chain OS=Mus musculus OX=10090 GN=Tpm1 PE=1 SV=1;tr|E9Q453|E9Q453_MOUSE Tropomyosin alpha-1 chain OS=Mus muscul	16	9	4	4	6	5	4	7	1	0	0	3	1	0	0	3	25.7	14.8	14.8	32.819	284	284;284;245;248;248;281;284;284;287;284;245;248;251;284;326;157	0	6.8365	By MS/MS	By matching	By matching	By MS/MS	0.61758	0.73322	74.154	2	1	Median	NaN	NaN	NaN	0.61758	NaN	NaN	NaN	0.73322
E9Q481;Q6P2K6	E9Q481;Q6P2K6	2;2	2;2	2;2	Serine/threonine-protein phosphatase 4 regulatory subunit 3A	Smek1	tr|E9Q481|E9Q481_MOUSE Serine/threonine-protein phosphatase 4 regulatory subunit 3A OS=Mus musculus OX=10090 GN=Ppp4r3a PE=1 SV=1;sp|Q6P2K6|P4R3A_MOUSE Serine/threonine-protein phosphatase 4 regulatory subunit 3A OS=Mus musculus OX=10090 GN=Ppp4r3a PE=1 SV	2	2	2	2	2	1	1	1	2	1	1	1	2	1	1	1	3.5	3.5	3.5	95.313	833	833;820	0.004401	1.8616	By MS/MS	By MS/MS	By matching	By MS/MS	0.80991	1.1631	21.48	3	0	Median	NaN	NaN	NaN	NaN	NaN	NaN	NaN	NaN
E9Q4B9;E9Q827;P56212;P60840	E9Q4B9;E9Q827;P56212;P60840	1;1;1;1	1;1;1;1	1;1;1;1	cAMP-regulated phosphoprotein 19;Alpha-endosulfine	Arpp19;Ensa	tr|E9Q4B9|E9Q4B9_MOUSE cAMP-regulated phosphoprotein 19 OS=Mus musculus OX=10090 GN=Arpp19 PE=1 SV=1;tr|E9Q827|E9Q827_MOUSE cAMP-regulated phosphoprotein 19 OS=Mus musculus OX=10090 GN=Arpp19 PE=1 SV=1;sp|P56212|ARP19_MOUSE cAMP-regulated phosphoprotein 19	4	1	1	1	0	1	1	0	0	1	1	0	0	1	1	0	15.5	15.5	15.5	7.6566	71	71;145;112;121	0	3.7385		By MS/MS	By MS/MS		0.60151	0.94634	1.7509	2	0	Median	NaN	NaN	NaN	NaN	NaN	NaN	NaN	NaN
E9Q4Q8;E9Q8R1;Q6P0X1;E9Q6U4;Q3UWL8	E9Q4Q8;E9Q8R1;Q6P0X1;E9Q6U4;Q3UWL8	1;1;1;1;1	1;1;1;1;1	1;1;1;1;1	Prefoldin subunit 4	Pfdn4	tr|E9Q4Q8|E9Q4Q8_MOUSE Prefoldin 4 (Fragment) OS=Mus musculus OX=10090 GN=Pfdn4 PE=1 SV=1;tr|E9Q8R1|E9Q8R1_MOUSE Prefoldin 4 (Fragment) OS=Mus musculus OX=10090 GN=Pfdn4 PE=1 SV=1;tr|Q6P0X1|Q6P0X1_MOUSE Prefoldin 4 OS=Mus musculus OX=10090 GN=Pfdn4 PE=1 SV	5	1	1	1	1	0	1	1	1	0	1	1	1	0	1	1	25.5	25.5	25.5	5.43	47	47;49;77;130;134	0	3.9574	By MS/MS		By MS/MS	By MS/MS	0.10974	0.14643	39.247	2	2	Median	NaN	NaN	NaN	NaN	NaN	NaN	NaN	NaN
E9Q4T8;Q9JLV5	E9Q4T8;Q9JLV5	1;1	1;1	1;1	Cullin-3	Cul3	tr|E9Q4T8|E9Q4T8_MOUSE Cullin-3 OS=Mus musculus OX=10090 GN=Cul3 PE=1 SV=1;sp|Q9JLV5|CUL3_MOUSE Cullin-3 OS=Mus musculus OX=10090 GN=Cul3 PE=1 SV=1	2	1	1	1	0	0	0	1	0	0	0	1	0	0	0	1	1.4	1.4	1.4	81.11	702	702;768	0	3.691				By MS/MS	NaN	NaN	NaN	1	1	Median	NaN	NaN	NaN	NaN	NaN	NaN	NaN	NaN
E9Q4V9;Q8BH74;A0A1W2P7R1	E9Q4V9;Q8BH74;A0A1W2P7R1	2;2;1	2;2;1	2;2;1	Nuclear pore complex protein Nup107	Nup107	tr|E9Q4V9|E9Q4V9_MOUSE Nuclear pore complex protein Nup107 OS=Mus musculus OX=10090 GN=Nup107 PE=1 SV=1;sp|Q8BH74|NU107_MOUSE Nuclear pore complex protein Nup107 OS=Mus musculus OX=10090 GN=Nup107 PE=1 SV=1;tr|A0A1W2P7R1|A0A1W2P7R1_MOUSE Nuclear pore compl	3	2	2	2	1	0	0	2	1	0	0	2	1	0	0	2	2.1	2.1	2.1	106.5	924	924;926;336	0	3.2078	By MS/MS			By MS/MS	NaN	NaN	NaN	1	1	Median	NaN	NaN	NaN	NaN	NaN	NaN	NaN	NaN
E9Q5B5;O08528;E9Q3Z4;E9Q8S8;Q3TRM8	E9Q5B5;O08528	8;8;2;2;2	5;5;1;1;1	5;5;1;1;1	Hexokinase;Hexokinase-2	Hk2	tr|E9Q5B5|E9Q5B5_MOUSE Hexokinase-2 OS=Mus musculus OX=10090 GN=Hk2 PE=1 SV=1;sp|O08528|HXK2_MOUSE Hexokinase-2 OS=Mus musculus OX=10090 GN=Hk2 PE=1 SV=1	5	8	5	5	6	6	4	6	4	3	2	4	4	3	2	4	11.2	8.2	8.2	99.213	889	889;917;867;877;922	0	11.809	By MS/MS	By MS/MS	By matching	By MS/MS	0.66738	0.93642	18.934	13	3	Leave out requantified	0.64645	0.55485	0.58482	0.69868	0.93603	0.93573	0.86552	0.85716
E9Q5K9;D6RG95	E9Q5K9;D6RG95	3;2	3;2	3;2	YTH domain-containing protein 1	Ythdc1	sp|E9Q5K9|YTDC1_MOUSE YTH domain-containing protein 1 OS=Mus musculus OX=10090 GN=Ythdc1 PE=1 SV=2;tr|D6RG95|D6RG95_MOUSE YTH domain-containing protein 1 OS=Mus musculus OX=10090 GN=Ythdc1 PE=1 SV=1	2	3	3	3	0	1	2	0	0	1	2	0	0	1	2	0	4.5	4.5	4.5	85.648	736	736;545	0	2.9851		By MS/MS	By MS/MS		0.81324	1.0451	72.704	2	1	Median	NaN	NaN	NaN	NaN	NaN	NaN	NaN	NaN
E9Q5Y5;Q8VDF2	E9Q5Y5;Q8VDF2	1;1	1;1	1;1	E3 ubiquitin-protein ligase UHRF1	Uhrf1	tr|E9Q5Y5|E9Q5Y5_MOUSE E3 ubiquitin-protein ligase UHRF1 (Fragment) OS=Mus musculus OX=10090 GN=Uhrf1 PE=1 SV=1;sp|Q8VDF2|UHRF1_MOUSE E3 ubiquitin-protein ligase UHRF1 OS=Mus musculus OX=10090 GN=Uhrf1 PE=1 SV=2	2	1	1	1	1	0	0	1	1	0	0	1	1	0	0	1	6.8	6.8	6.8	16.707	146	146;782	0	4.1189	By MS/MS			By MS/MS	NaN	NaN	NaN	0	0	Median	NaN	NaN	NaN	NaN	NaN	NaN	NaN	NaN
E9Q616	E9Q616	9	9	9		Ahnak	tr|E9Q616|E9Q616_MOUSE AHNAK nucleoprotein (desmoyokin) OS=Mus musculus OX=10090 GN=Ahnak PE=1 SV=1	1	9	9	9	4	7	6	4	4	7	6	4	4	7	6	4	11.8	11.8	11.8	604.25	5656	5656	0	16.252	By MS/MS	By MS/MS	By MS/MS	By MS/MS	0.49734	0.74592	6.9396	22	7	Leave out requantified	0.46166	0.39475	0.49	0.66295	0.65348	0.68509	0.70874	0.81197
Q3UIX4;F6RDI8;E9Q6E5;D3Z4B0;F6TN80;D6RE22;F6X2U6;A0A0G2JEG1	Q3UIX4;F6RDI8;E9Q6E5;D3Z4B0;F6TN80;D6RE22	4;4;4;3;2;2;1;1	4;4;4;3;2;2;1;1	4;4;4;3;2;2;1;1		Srsf11	tr|Q3UIX4|Q3UIX4_MOUSE Serine/arginine-rich-splicing factor 11 OS=Mus musculus OX=10090 GN=Srsf11 PE=1 SV=1;tr|F6RDI8|F6RDI8_MOUSE Serine/arginine-rich-splicing factor 11 (Fragment) OS=Mus musculus OX=10090 GN=Srsf11 PE=1 SV=1;tr|E9Q6E5|E9Q6E5_MOUSE Serine	8	4	4	4	3	4	3	4	3	4	3	4	3	4	3	4	12.6	12.6	12.6	53.102	476	476;500;511;192;101;112;53;175	0	11.84	By MS/MS	By MS/MS	By MS/MS	By MS/MS	0.80106	1.1479	4.5071	11	0	Leave out requantified	0.88029	0.66723	0.75997	0.89751	1.2317	1.1479	1.0949	1.0895
E9Q6L4;Q60949	E9Q6L4;Q60949	1;1	1;1	1;1	TBC1 domain family member 1	Tbc1d1	tr|E9Q6L4|E9Q6L4_MOUSE TBC1 domain family member 1 OS=Mus musculus OX=10090 GN=Tbc1d1 PE=1 SV=1;sp|Q60949|TBCD1_MOUSE TBC1 domain family member 1 OS=Mus musculus OX=10090 GN=Tbc1d1 PE=1 SV=3	2	1	1	1	0	0	0	1	0	0	0	1	0	0	0	1	1	1	1	117.3	1033	1033;1255	0.0044139	1.894				By MS/MS	NaN	NaN	NaN	0	0	Median	NaN	NaN	NaN	NaN	NaN	NaN	NaN	NaN
E9Q6M7;Q3TTW5;Q80U78;A8WHM8;F6YD01;Q3TQ29;Q3UR91;Q80U58	E9Q6M7;Q3TTW5;Q80U78;A8WHM8;F6YD01;Q3TQ29;Q3UR91;Q80U58	2;2;2;1;1;1;1;1	2;2;2;1;1;1;1;1	2;2;2;1;1;1;1;1	Pumilio homolog 1;Pumilio homolog 2	Pum1;Pum2	tr|E9Q6M7|E9Q6M7_MOUSE Pumilio homolog 1 OS=Mus musculus OX=10090 GN=Pum1 PE=1 SV=1;tr|Q3TTW5|Q3TTW5_MOUSE Pumilio homolog 1 OS=Mus musculus OX=10090 GN=Pum1 PE=1 SV=1;sp|Q80U78|PUM1_MOUSE Pumilio homolog 1 OS=Mus musculus OX=10090 GN=Pum1 PE=1 SV=2;tr|A8W	8	2	2	2	1	0	2	1	1	0	2	1	1	0	2	1	3	3	3	100.36	944	944;1092;1189;218;222;980;1064;1066	0.0015593	2.2929	By MS/MS		By MS/MS	By MS/MS	0.73248	0.89215	10.144	3	1	Median	NaN	NaN	NaN	NaN	NaN	NaN	NaN	NaN
E9Q6Q4;Q3TU36;E9Q912;A0A0G2JGC8	E9Q6Q4;Q3TU36;E9Q912;A0A0G2JGC8	2;2;2;1	2;2;2;1	2;2;2;1		Rap1gds1	tr|E9Q6Q4|E9Q6Q4_MOUSE RAP1, GTP-GDP dissociation stimulator 1 OS=Mus musculus OX=10090 GN=Rap1gds1 PE=1 SV=1;tr|Q3TU36|Q3TU36_MOUSE RAP1, GTP-GDP dissociation stimulator 1 OS=Mus musculus OX=10090 GN=Rap1gds1 PE=1 SV=1;tr|E9Q912|E9Q912_MOUSE RAP1, GTP-GDP	4	2	2	2	1	2	1	1	1	2	1	1	1	2	1	1	4.5	4.5	4.5	60.792	558	558;606;607;544	0	8.1629	By MS/MS	By MS/MS	By MS/MS	By MS/MS	0.14109	0.16821	63.397	2	2	Median	NaN	0.14109	NaN	NaN	NaN	0.16821	NaN	NaN
E9Q6R7	E9Q6R7	1	1	1		Utrn	tr|E9Q6R7|E9Q6R7_MOUSE Utrophin OS=Mus musculus OX=10090 GN=Utrn PE=1 SV=1	1	1	1	1	0	1	1	0	0	1	1	0	0	1	1	0	0.3	0.3	0.3	392.7	3430	3430	0.0030334	2.0713		By MS/MS	By MS/MS		0.54372	0.84705	5.5188	2	1	Median	NaN	NaN	NaN	NaN	NaN	NaN	NaN	NaN
E9Q6Y0	E9Q6Y0	1	1	1	Transmembrane channel-like protein	Tmc3	tr|E9Q6Y0|E9Q6Y0_MOUSE Transmembrane channel-like protein OS=Mus musculus OX=10090 GN=Tmc3 PE=3 SV=1	1	1	1	1	0	1	0	0	0	1	0	0	0	1	0	0	0.7	0.7	0.7	125.72	1101	1101	1	-2		By MS/MS			NaN	NaN	NaN	1	1	Median	NaN	NaN	NaN	NaN	NaN	NaN	NaN	NaN
E9Q740;F8VQC1	E9Q740;F8VQC1	8;8	8;8	8;8	Signal recognition particle subunit SRP72	Srp72	tr|E9Q740|E9Q740_MOUSE Signal recognition particle subunit SRP72 OS=Mus musculus OX=10090 GN=Srp72 PE=1 SV=1;tr|F8VQC1|F8VQC1_MOUSE Signal recognition particle subunit SRP72 OS=Mus musculus OX=10090 GN=Srp72 PE=1 SV=1	2	8	8	8	5	3	5	3	5	3	5	3	5	3	5	3	15.4	15.4	15.4	67.928	610	610;671	0	22.159	By MS/MS	By MS/MS	By MS/MS	By MS/MS	0.78182	1.0179	10.372	13	2	Leave out requantified	0.71346	1.1421	0.61578	0.65463	0.99331	1.9941	0.89092	0.79836
E9Q7E1;Q8CDI7	E9Q7E1;Q8CDI7	1;1	1;1	1;1	Coiled-coil domain-containing protein 150	Ccdc150	tr|E9Q7E1|E9Q7E1_MOUSE Coiled-coil domain-containing protein 150 OS=Mus musculus OX=10090 GN=Ccdc150 PE=4 SV=1;sp|Q8CDI7|CC150_MOUSE Coiled-coil domain-containing protein 150 OS=Mus musculus OX=10090 GN=Ccdc150 PE=2 SV=2	2	1	1	1	1	1	1	1	1	1	1	1	1	1	1	1	1.7	1.7	1.7	66.3	580	580;1110	0.0061787	1.6785	By matching	By MS/MS	By matching	By matching	0.46547	0.71007	23.439	4	0	Median	NaN	NaN	NaN	NaN	NaN	NaN	NaN	NaN
E9Q7G0;A0A1B0GSW3;A0A1B0GT61;F6ZQA3	E9Q7G0;A0A1B0GSW3	9;6;4;2	9;6;4;2	9;6;4;2		Numa1	sp|E9Q7G0|NUMA1_MOUSE Nuclear mitotic apparatus protein 1 OS=Mus musculus OX=10090 GN=Numa1 PE=1 SV=1;tr|A0A1B0GSW3|A0A1B0GSW3_MOUSE Nuclear mitotic apparatus protein 1 (Fragment) OS=Mus musculus OX=10090 GN=Numa1 PE=1 SV=1	4	9	9	9	2	5	3	4	2	5	3	4	2	5	3	4	4.9	4.9	4.9	235.63	2094	2094;1082;875;741	0	13.168	By MS/MS	By MS/MS	By MS/MS	By MS/MS	0.6127	0.8677	120.58	9	6	Median	0.38212	0.77177	0.2462	0.23609	0.53892	1.3266	0.30896	0.29458
E9Q800;Q8CAQ8;E9QAY6;A0A0U1RP81;A0A1B0GX08;E9PVS5;A0A0U1RQ14	E9Q800;Q8CAQ8;E9QAY6;A0A0U1RP81	11;11;10;9;5;3;2	11;11;10;9;5;3;2	11;11;10;9;5;3;2	MICOS complex subunit Mic60	Immt	tr|E9Q800|E9Q800_MOUSE MICOS complex subunit MIC60 OS=Mus musculus OX=10090 GN=Immt PE=1 SV=1;sp|Q8CAQ8|MIC60_MOUSE MICOS complex subunit Mic60 OS=Mus musculus OX=10090 GN=Immt PE=1 SV=1;tr|E9QAY6|E9QAY6_MOUSE MICOS complex subunit MIC60 OS=Mus musculus OX	7	11	11	11	6	6	6	5	6	6	6	5	6	6	6	5	20.9	20.9	20.9	75.6	679	679;757;470;488;264;188;289	0	22.347	By MS/MS	By MS/MS	By MS/MS	By MS/MS	0.61299	0.917	39.42	20	15	Leave out requantified	0.68092	0.37894	0.72274	0.55852	0.95957	0.53851	1.0355	0.69691
E9QAS4;E9QAS5;Q6PDQ2;E9PYU4;E9PYL1;A2A8L1;F6WR45;F7C528;E9Q614;B1AR17;F6V4V3	E9QAS4;E9QAS5;Q6PDQ2;E9PYU4;E9PYL1;A2A8L1	10;10;10;6;6;6;4;3;3;3;1	10;10;10;6;6;6;4;3;3;3;1	10;10;10;6;6;6;4;3;3;3;1	Chromodomain-helicase-DNA-binding protein 4;Chromodomain-helicase-DNA-binding protein 5	Chd4;Chd5	tr|E9QAS4|E9QAS4_MOUSE Chromodomain-helicase-DNA-binding protein 4 OS=Mus musculus OX=10090 GN=Chd4 PE=1 SV=1;tr|E9QAS5|E9QAS5_MOUSE Chromodomain-helicase-DNA-binding protein 4 OS=Mus musculus OX=10090 GN=Chd4 PE=1 SV=1;sp|Q6PDQ2|CHD4_MOUSE Chromodomain-he	11	10	10	10	5	4	4	3	5	4	4	3	5	4	4	3	6	6	6	216.37	1902	1902;1922;1915;1915;1952;1946;444;1886;2021;2055;197	0	25.818	By MS/MS	By MS/MS	By MS/MS	By MS/MS	0.17113	0.21298	134.33	12	10	Median	0.10181	0.59994	0.21159	NaN	0.14182	0.71527	0.23528	NaN
E9QB02;Q68FL6;F6W0G8	E9QB02;Q68FL6	12;12;3	12;12;3	12;12;3	Methionine--tRNA ligase, cytoplasmic	Mars	tr|E9QB02|E9QB02_MOUSE Methionine--tRNA ligase, cytoplasmic OS=Mus musculus OX=10090 GN=Mars PE=1 SV=1;sp|Q68FL6|SYMC_MOUSE Methionine--tRNA ligase, cytoplasmic OS=Mus musculus OX=10090 GN=Mars PE=1 SV=1	3	12	12	12	6	10	9	7	6	10	9	7	6	10	9	7	16.7	16.7	16.7	102.37	910	910;902;184	0	37.378	By MS/MS	By MS/MS	By MS/MS	By MS/MS	0.6264	0.90616	9.1663	31	22	Leave out requantified	0.29673	0.58662	0.62875	0.68609	0.41336	0.90627	0.93069	0.83335
E9QJT2;Q3UMQ8	E9QJT2;Q3UMQ8	1;1	1;1	1;1	H/ACA ribonucleoprotein complex non-core subunit NAF1	Naf1	tr|E9QJT2|E9QJT2_MOUSE H/ACA ribonucleoprotein complex non-core subunit NAF1 OS=Mus musculus OX=10090 GN=Naf1 PE=1 SV=1;sp|Q3UMQ8|NAF1_MOUSE H/ACA ribonucleoprotein complex non-core subunit NAF1 OS=Mus musculus OX=10090 GN=Naf1 PE=1 SV=2	2	1	1	1	1	1	0	1	1	1	0	1	1	1	0	1	2.7	2.7	2.7	63.65	597	597;489	0.0057197	1.6944	By MS/MS	By MS/MS		By MS/MS	0.091021	0.1173	41.321	2	2	Median	NaN	NaN	NaN	NaN	NaN	NaN	NaN	NaN
E9QKZ2;Q91YE6;E0CXB2;E0CY46;F6TLX3;F6UT58	E9QKZ2;Q91YE6;E0CXB2	8;8;4;2;2;1	8;8;4;2;2;1	8;8;4;2;2;1	Importin-9	Ipo9	tr|E9QKZ2|E9QKZ2_MOUSE Importin-9 OS=Mus musculus OX=10090 GN=Ipo9 PE=1 SV=1;sp|Q91YE6|IPO9_MOUSE Importin-9 OS=Mus musculus OX=10090 GN=Ipo9 PE=1 SV=3;tr|E0CXB2|E0CXB2_MOUSE Importin-9 OS=Mus musculus OX=10090 GN=Ipo9 PE=1 SV=1	6	8	8	8	5	3	5	6	5	3	5	6	5	3	5	6	10.8	10.8	10.8	115.95	1040	1040;1041;655;55;171;52	0	27.1	By MS/MS	By MS/MS	By MS/MS	By MS/MS	0.61736	0.80496	7.1299	16	6	Leave out requantified	0.61491	0.48793	0.51884	0.64801	0.87193	0.81098	0.74072	0.78932
E9QLL2;Q8BZ98;F2Z460;E0CXZ8	E9QLL2;Q8BZ98	3;3;1;1	1;1;1;1	1;1;1;1	Dynamin-3	Dnm3	tr|E9QLL2|E9QLL2_MOUSE Dynamin-3 OS=Mus musculus OX=10090 GN=Dnm3 PE=1 SV=1;sp|Q8BZ98|DYN3_MOUSE Dynamin-3 OS=Mus musculus OX=10090 GN=Dnm3 PE=1 SV=1	4	3	1	1	2	2	0	1	0	1	0	0	0	1	0	0	5.2	1.3	1.3	97.272	863	863;863;319;319	0.0015707	2.3712	By matching	By MS/MS		By matching	NaN	NaN	NaN	1	1	Median	NaN	NaN	NaN	NaN	NaN	NaN	NaN	NaN
E9QN31;A0A0N4SW16	E9QN31	5;1	5;1	1;0		Nop2	tr|E9QN31|E9QN31_MOUSE Probable 28S rRNA (cytosine-C(5))-methyltransferase OS=Mus musculus OX=10090 GN=Nop2 PE=1 SV=1	2	5	5	1	3	4	4	3	3	4	4	3	0	1	1	0	5.3	5.3	1.1	86.906	794	794;133	0	12.785	By MS/MS	By MS/MS	By MS/MS	By MS/MS	0.2286	0.27254	87.533	9	5	Median	0.34903	0.2286	0.36929	0.29441	0.49474	0.27254	0.46424	0.36714
E9QND8;Q6PA06	E9QND8;Q6PA06	1;1	1;1	1;1	Atlastin-2	Atl2	tr|E9QND8|E9QND8_MOUSE Atlastin-2 OS=Mus musculus OX=10090 GN=Atl2 PE=1 SV=1;sp|Q6PA06|ATLA2_MOUSE Atlastin-2 OS=Mus musculus OX=10090 GN=Atl2 PE=1 SV=1	2	1	1	1	1	1	1	1	1	1	1	1	1	1	1	1	3.6	3.6	3.6	46.875	412	412;583	0.0010776	2.6359	By MS/MS	By MS/MS	By MS/MS	By MS/MS	0.77218	0.89349	8.5131	4	0	Linear	NaN	NaN	NaN	NaN	NaN	NaN	NaN	NaN
G5E8R3;E9QPD7;Q05920;A0A286YCC5	G5E8R3;E9QPD7;Q05920	15;15;15;2	15;15;15;2	15;15;15;2	Pyruvate carboxylase;Pyruvate carboxylase, mitochondrial	Pcx;Pc	tr|G5E8R3|G5E8R3_MOUSE Pyruvate carboxylase OS=Mus musculus OX=10090 GN=Pcx PE=1 SV=1;tr|E9QPD7|E9QPD7_MOUSE Pyruvate carboxylase OS=Mus musculus OX=10090 GN=Pcx PE=1 SV=1;sp|Q05920|PYC_MOUSE Pyruvate carboxylase, mitochondrial OS=Mus musculus OX=10090 GN=	4	15	15	15	10	6	9	9	10	6	9	9	10	6	9	9	15.2	15.2	15.2	129.7	1178	1178;1179;1178;116	0	39.168	By MS/MS	By MS/MS	By MS/MS	By MS/MS	0.36863	0.56236	39.743	29	15	Leave out requantified	0.37264	0.39493	0.39424	0.49395	0.52472	0.66026	0.56481	0.6017
E9QPI5;Q6A026	E9QPI5;Q6A026	6;6	6;6	5;5	Sister chromatid cohesion protein PDS5 homolog A	Pds5a	tr|E9QPI5|E9QPI5_MOUSE Sister chromatid cohesion protein PDS5 homolog A OS=Mus musculus OX=10090 GN=Pds5a PE=1 SV=1;sp|Q6A026|PDS5A_MOUSE Sister chromatid cohesion protein PDS5 homolog A OS=Mus musculus OX=10090 GN=Pds5a PE=1 SV=3	2	6	6	5	3	4	5	2	3	4	5	2	2	3	4	2	5.9	5.9	5	150.22	1332	1332;1332	0	13.156	By MS/MS	By MS/MS	By MS/MS	By MS/MS	0.10507	0.1476	130.76	7	3	Median	0.062491	0.20283	0.2649	NaN	0.087421	0.29375	0.34655	NaN
F2Z438;F2Z420;Q91WC0;D6RCY6	F2Z438;F2Z420;Q91WC0;D6RCY6	2;2;2;1	2;2;2;1	2;2;2;1	Histone-lysine N-methyltransferase setd3	Setd3	tr|F2Z438|F2Z438_MOUSE Histone-lysine N-methyltransferase (Fragment) OS=Mus musculus OX=10090 GN=Setd3 PE=1 SV=1;tr|F2Z420|F2Z420_MOUSE Histone-lysine N-methyltransferase OS=Mus musculus OX=10090 GN=Setd3 PE=1 SV=1;sp|Q91WC0|SETD3_MOUSE Histone-lysine N-me	4	2	2	2	1	2	0	0	1	2	0	0	1	2	0	0	14.2	14.2	14.2	17.435	155	155;290;594;81	0	4.29	By MS/MS	By MS/MS			0.42225	0.6418	14.263	2	2	Median	NaN	NaN	NaN	NaN	NaN	NaN	NaN	NaN
F2Z456;Q9DCN2;A0A0A0MQM3	F2Z456;Q9DCN2;A0A0A0MQM3	13;13;7	13;13;7	13;13;7	NADH-cytochrome b5 reductase;NADH-cytochrome b5 reductase 3;NADH-cytochrome b5 reductase 3 membrane-bound form;NADH-cytochrome b5 reductase 3 soluble form	Cyb5r3	tr|F2Z456|F2Z456_MOUSE NADH-cytochrome b5 reductase OS=Mus musculus OX=10090 GN=Cyb5r3 PE=1 SV=1;sp|Q9DCN2|NB5R3_MOUSE NADH-cytochrome b5 reductase 3 OS=Mus musculus OX=10090 GN=Cyb5r3 PE=1 SV=3;tr|A0A0A0MQM3|A0A0A0MQM3_MOUSE NADH-cytochrome b5 reductase 3	3	13	13	13	8	9	8	9	8	9	8	9	8	9	8	9	42.8	42.8	42.8	34.929	313	313;301;143	0	55.471	By MS/MS	By MS/MS	By MS/MS	By MS/MS	0.85258	1.134	22.446	44	25	Leave out requantified	0.81012	0.5836	0.70492	0.91469	1.1463	1.0067	1.0454	1.1333
F6Q3W0;P61965	F6Q3W0;P61965	1;1	1;1	1;1	WD repeat-containing protein 5	Wdr5	tr|F6Q3W0|F6Q3W0_MOUSE WD repeat-containing protein 5 (Fragment) OS=Mus musculus OX=10090 GN=Wdr5 PE=1 SV=1;sp|P61965|WDR5_MOUSE WD repeat-containing protein 5 OS=Mus musculus OX=10090 GN=Wdr5 PE=1 SV=1	2	1	1	1	0	1	1	1	0	1	1	1	0	1	1	1	5.7	5.7	5.7	31.014	281	281;334	0.001073	2.5915		By MS/MS	By MS/MS	By MS/MS	0.039161	0.046689	22.351	3	3	Median	NaN	NaN	NaN	NaN	NaN	NaN	NaN	NaN
F6QCI0;Q8BQ46	F6QCI0;Q8BQ46	3;3	1;1	1;1		Taf15	tr|F6QCI0|F6QCI0_MOUSE TATA-box-binding protein-associated factor 15 (Fragment) OS=Mus musculus OX=10090 GN=Taf15 PE=1 SV=1;tr|Q8BQ46|Q8BQ46_MOUSE TAF15 RNA polymerase II, TATA box binding protein (TBP)-associated factor OS=Mus musculus OX=10090 GN=Taf15 P	2	3	1	1	1	3	2	1	0	1	0	0	0	1	0	0	11.4	4.3	4.3	33.603	324	324;557	0.0084309	1.5714	By matching	By MS/MS	By matching	By matching	NaN	NaN	NaN	0	0	Median	NaN	NaN	NaN	NaN	NaN	NaN	NaN	NaN
F6ZQL0;F6ZSG0;F6QFT1;F6QHD1;Q80WJ7	F6ZQL0;F6ZSG0;F6QFT1;F6QHD1;Q80WJ7	1;1;1;1;1	1;1;1;1;1	1;1;1;1;1	Protein LYRIC	Mtdh	tr|F6ZQL0|F6ZQL0_MOUSE Protein LYRIC (Fragment) OS=Mus musculus OX=10090 GN=Mtdh PE=1 SV=1;tr|F6ZSG0|F6ZSG0_MOUSE Protein LYRIC (Fragment) OS=Mus musculus OX=10090 GN=Mtdh PE=1 SV=1;tr|F6QFT1|F6QFT1_MOUSE Protein LYRIC (Fragment) OS=Mus musculus OX=10090 G	5	1	1	1	0	1	0	0	0	1	0	0	0	1	0	0	4.1	4.1	4.1	24.262	220	220;356;382;393;579	0.0048426	1.7886		By MS/MS			NaN	NaN	NaN	1	1	Median	NaN	NaN	NaN	NaN	NaN	NaN	NaN	NaN
F6QL70;Q5M8M8;P47915;A0A1L1SS27;W4VSN7;A0A1L1SUN1;A0A1L1STJ3	F6QL70;Q5M8M8;P47915;A0A1L1SS27;W4VSN7;A0A1L1SUN1	5;5;5;4;4;3;1	5;5;5;4;4;3;1	5;5;5;4;4;3;1	60S ribosomal protein L29	Gm17669;Rpl29;Gm3550	tr|F6QL70|F6QL70_MOUSE 60S ribosomal protein L29 OS=Mus musculus OX=10090 GN=Gm17669 PE=3 SV=1;tr|Q5M8M8|Q5M8M8_MOUSE 60S ribosomal protein L29 OS=Mus musculus OX=10090 GN=Rpl29 PE=1 SV=1;sp|P47915|RL29_MOUSE 60S ribosomal protein L29 OS=Mus musculus OX=10	7	5	5	5	5	4	4	3	5	4	4	3	5	4	4	3	24.7	24.7	24.7	16.966	154	154;160;160;140;160;94;68	0	15.49	By MS/MS	By MS/MS	By MS/MS	By MS/MS	0.6073	0.90384	9.5079	19	2	Leave out requantified	0.61198	0.46068	0.58506	0.73982	0.86212	0.8247	0.86746	0.92704
F6RJ39;Q9JIX8;Q52KR6;B8JJ92;B8JJ91;B8JJ90	F6RJ39;Q9JIX8;Q52KR6;B8JJ92;B8JJ91	6;6;5;5;5;1	6;6;5;5;5;1	6;6;5;5;5;1	Apoptotic chromatin condensation inducer in the nucleus	Acin1	tr|F6RJ39|F6RJ39_MOUSE Apoptotic chromatin condensation inducer in the nucleus (Fragment) OS=Mus musculus OX=10090 GN=Acin1 PE=1 SV=1;sp|Q9JIX8|ACINU_MOUSE Apoptotic chromatin condensation inducer in the nucleus OS=Mus musculus OX=10090 GN=Acin1 PE=1 SV=3;	6	6	6	6	1	4	3	1	1	4	3	1	1	4	3	1	7.8	7.8	7.8	143.54	1272	1272;1338;552;580;634;221	0	11.233	By matching	By MS/MS	By MS/MS	By MS/MS	0.73018	1.0394	5.4735	6	2	Leave out requantified	NaN	0.30291	0.73632	NaN	NaN	0.43066	1.0464	NaN
F6RJV6;Q9JJK2	F6RJV6;Q9JJK2	2;2	2;2	2;2	LanC-like protein 2	Lancl2	tr|F6RJV6|F6RJV6_MOUSE LanC-like protein 2 (Fragment) OS=Mus musculus OX=10090 GN=Lancl2 PE=1 SV=1;sp|Q9JJK2|LANC2_MOUSE LanC-like protein 2 OS=Mus musculus OX=10090 GN=Lancl2 PE=1 SV=1	2	2	2	2	1	2	2	0	1	2	2	0	1	2	2	0	5	5	5	49.742	441	441;450	0	3.9204	By matching	By MS/MS	By MS/MS		0.71911	1.0897	21.472	5	0	Leave out requantified	NaN	0.68355	0.76902	NaN	NaN	1.1551	1.1165	NaN
F6RPJ9;Q9JHR7	F6RPJ9;Q9JHR7	8;7	8;7	8;7	Insulin-degrading enzyme	Ide	tr|F6RPJ9|F6RPJ9_MOUSE Insulin-degrading enzyme (Fragment) OS=Mus musculus OX=10090 GN=Ide PE=1 SV=1;sp|Q9JHR7|IDE_MOUSE Insulin-degrading enzyme OS=Mus musculus OX=10090 GN=Ide PE=1 SV=1	2	8	8	8	3	7	6	5	3	7	6	5	3	7	6	5	8.6	8.6	8.6	114.15	987	987;1019	0	18.109	By MS/MS	By MS/MS	By MS/MS	By MS/MS	0.63696	0.92366	2.0825	19	5	Leave out requantified	0.69456	0.4995	0.69542	0.78988	0.9548	0.82905	0.99718	0.96614
F6SVV1;P62082	F6SVV1;P62082	9;9	9;9	9;9	40S ribosomal protein S7	Gm9493;Rps7	tr|F6SVV1|F6SVV1_MOUSE 40S ribosomal protein S7 OS=Mus musculus OX=10090 GN=Gm9493 PE=3 SV=1;sp|P62082|RS7_MOUSE 40S ribosomal protein S7 OS=Mus musculus OX=10090 GN=Rps7 PE=2 SV=1	2	9	9	9	7	6	8	6	7	6	8	6	7	6	8	6	53.6	53.6	53.6	21.882	192	192;194	0	26.894	By MS/MS	By MS/MS	By MS/MS	By MS/MS	0.64796	0.98165	38.134	29	5	Leave out requantified	0.68623	0.51814	0.63073	0.78806	0.99101	0.9264	0.91398	0.97306
F6TMN2;Q3U3G8;Q9EPB5	F6TMN2;Q3U3G8;Q9EPB5	1;1;1	1;1;1	1;1;1	Serine hydrolase-like protein	Serhl	tr|F6TMN2|F6TMN2_MOUSE Serine hydrolase-like protein (Fragment) OS=Mus musculus OX=10090 GN=Serhl PE=1 SV=1;tr|Q3U3G8|Q3U3G8_MOUSE Serine hydrolase-like protein OS=Mus musculus OX=10090 GN=Serhl PE=1 SV=1;sp|Q9EPB5|SERHL_MOUSE Serine hydrolase-like protein	3	1	1	1	0	0	0	1	0	0	0	1	0	0	0	1	15.3	15.3	15.3	6.5383	59	59;321;311	0.0015601	2.2976				By MS/MS	NaN	NaN	NaN	0	0	Median	NaN	NaN	NaN	NaN	NaN	NaN	NaN	NaN
Q8BPI2;F6V6T4;Q9R0Q3	Q8BPI2;F6V6T4;Q9R0Q3	1;1;1	1;1;1	1;1;1	Transmembrane emp24 domain-containing protein 2	Tmed2	tr|Q8BPI2|Q8BPI2_MOUSE Transmembrane emp24 domain-containing protein 2 (Fragment) OS=Mus musculus OX=10090 GN=Tmed2 PE=1 SV=1;tr|F6V6T4|F6V6T4_MOUSE Transmembrane emp24 domain-containing protein 2 (Fragment) OS=Mus musculus OX=10090 GN=Tmed2 PE=1 SV=1;sp|Q	3	1	1	1	0	1	1	1	0	1	1	1	0	1	1	1	8	8	8	13.011	112	112;176;201	0	4.3398		By MS/MS	By MS/MS	By MS/MS	NaN	NaN	NaN	1	1	Median	NaN	NaN	NaN	NaN	NaN	NaN	NaN	NaN
F6V8R7;Q3TE40;Q62193	F6V8R7;Q3TE40;Q62193	1;1;1	1;1;1	1;1;1	Replication protein A 32 kDa subunit	Rpa2	tr|F6V8R7|F6V8R7_MOUSE Replication protein A 32 kDa subunit (Fragment) OS=Mus musculus OX=10090 GN=Rpa2 PE=1 SV=1;tr|Q3TE40|Q3TE40_MOUSE Replication protein A 32 kDa subunit OS=Mus musculus OX=10090 GN=Rpa2 PE=1 SV=1;sp|Q62193|RFA2_MOUSE Replication protei	3	1	1	1	1	0	1	1	1	0	1	1	1	0	1	1	20	20	20	7.5075	70	70;270;270	0	3.8226	By MS/MS		By MS/MS	By MS/MS	NaN	NaN	NaN	1	1	Median	NaN	NaN	NaN	NaN	NaN	NaN	NaN	NaN
F6V9T4;F7B673;F7D4S5;Q68FF7	F6V9T4;F7B673;F7D4S5;Q68FF7	1;1;1;1	1;1;1;1	1;1;1;1	SLAIN motif-containing protein 1	Slain1	tr|F6V9T4|F6V9T4_MOUSE SLAIN motif-containing protein 1 (Fragment) OS=Mus musculus OX=10090 GN=Slain1 PE=1 SV=1;tr|F7B673|F7B673_MOUSE SLAIN motif-containing protein 1 (Fragment) OS=Mus musculus OX=10090 GN=Slain1 PE=1 SV=1;tr|F7D4S5|F7D4S5_MOUSE SLAIN mot	4	1	1	1	0	0	1	0	0	0	1	0	0	0	1	0	3.3	3.3	3.3	24.11	214	214;420;532;579	0.0035035	1.9973			By MS/MS		NaN	NaN	NaN	0	0	Median	NaN	NaN	NaN	NaN	NaN	NaN	NaN	NaN
G3UVU9;F6VRF7;F6VMC4;Q9ERI5	G3UVU9;F6VRF7;F6VMC4;Q9ERI5	1;1;1;1	1;1;1;1	1;1;1;1	Bifunctional arginine demethylase and lysyl-hydroxylase JMJD6	Jmjd6	tr|G3UVU9|G3UVU9_MOUSE Bifunctional arginine demethylase and lysyl-hydroxylase JMJD6 OS=Mus musculus OX=10090 GN=Jmjd6 PE=1 SV=1;tr|F6VRF7|F6VRF7_MOUSE Bifunctional arginine demethylase and lysyl-hydroxylase JMJD6 (Fragment) OS=Mus musculus OX=10090 GN=Jmj	4	1	1	1	1	1	1	1	1	1	1	1	1	1	1	1	4.8	4.8	4.8	32.003	270	270;287;309;403	0	3.3769	By MS/MS	By MS/MS	By MS/MS	By MS/MS	0.9345	1.1906	7.4734	4	0	Linear	NaN	NaN	NaN	NaN	NaN	NaN	NaN	NaN
F6YY69;F6VW30;P68254	F6YY69;F6VW30;P68254	11;11;11	6;6;6	6;6;6	14-3-3 protein theta	Ywhaq	tr|F6YY69|F6YY69_MOUSE 14-3-3 protein theta (Fragment) OS=Mus musculus OX=10090 GN=Ywhaq PE=1 SV=1;tr|F6VW30|F6VW30_MOUSE 14-3-3 protein theta (Fragment) OS=Mus musculus OX=10090 GN=Ywhaq PE=1 SV=1;sp|P68254|1433T_MOUSE 14-3-3 protein theta OS=Mus musculus	3	11	6	6	9	11	9	10	6	6	5	6	6	6	5	6	44.2	29.8	29.8	32.221	285	285;303;245	0	82.98	By MS/MS	By MS/MS	By MS/MS	By MS/MS	0.88778	1.1863	4.1702	24	2	Leave out requantified	0.86705	0.74276	0.85269	0.93108	1.2235	1.2426	1.1435	1.1553
F6W2Q5;Q5JC28;H3BK65;P42567;H3BJB8	F6W2Q5;Q5JC28;H3BK65;P42567;H3BJB8	2;2;2;2;1	2;2;2;2;1	2;2;2;2;1	Epidermal growth factor receptor substrate 15	Eps15	tr|F6W2Q5|F6W2Q5_MOUSE Epidermal growth factor receptor substrate 15 OS=Mus musculus OX=10090 GN=Eps15 PE=1 SV=1;tr|Q5JC28|Q5JC28_MOUSE Epidermal growth factor receptor pathway substrate 15 isoform B OS=Mus musculus OX=10090 GN=Eps15 PE=1 SV=1;tr|H3BK65|H3	5	2	2	2	1	1	0	2	1	1	0	2	1	1	0	2	2.5	2.5	2.5	83.593	764	764;793;933;897;103	0.0025562	2.1584	By matching	By MS/MS		By MS/MS	0.87509	1.0888	28.021	3	0	Plateau	NaN	NaN	NaN	NaN	NaN	NaN	NaN	NaN
F6Z5N5;F6YTG0;Q3TLP5	F6Z5N5;F6YTG0;Q3TLP5	1;1;1	1;1;1	1;1;1	Enoyl-CoA hydratase domain-containing protein 2, mitochondrial	Echdc2	tr|F6Z5N5|F6Z5N5_MOUSE Enoyl-CoA hydratase domain-containing protein 2, mitochondrial (Fragment) OS=Mus musculus OX=10090 GN=Echdc2 PE=1 SV=1;tr|F6YTG0|F6YTG0_MOUSE Enoyl-CoA hydratase domain-containing protein 2, mitochondrial (Fragment) OS=Mus musculus O	3	1	1	1	1	1	1	1	1	1	1	1	1	1	1	1	14.3	14.3	14.3	12.647	119	119;185;296	0	2.8616	By MS/MS	By MS/MS	By MS/MS	By MS/MS	NaN	NaN	NaN	0	0	Median	NaN	NaN	NaN	NaN	NaN	NaN	NaN	NaN
F6YVP7;P62270;A0A1Y7VKY1;S4R1N6	F6YVP7;P62270;A0A1Y7VKY1;S4R1N6	11;11;10;9	11;11;10;9	11;11;10;9	40S ribosomal protein S18	Gm10260;Rps18	tr|F6YVP7|F6YVP7_MOUSE Uncharacterized protein OS=Mus musculus OX=10090 GN=Gm10260 PE=3 SV=2;sp|P62270|RS18_MOUSE 40S ribosomal protein S18 OS=Mus musculus OX=10090 GN=Rps18 PE=1 SV=3;tr|A0A1Y7VKY1|A0A1Y7VKY1_MOUSE MCG116671 OS=Mus musculus OX=10090 GN=Gm1	4	11	11	11	10	9	9	4	10	9	9	4	10	9	9	4	58.6	58.6	58.6	17.671	152	152;152;152;107	0	52.633	By MS/MS	By MS/MS	By MS/MS	By MS/MS	0.66328	0.97757	3.2269	30	14	Leave out requantified	0.69363	0.60236	0.65211	0.77624	0.98816	1.0173	0.95127	0.98135
F6Z9L5;Q9EP97	F6Z9L5;Q9EP97	1;1	1;1	1;1	Sentrin-specific protease 3	Senp3	tr|F6Z9L5|F6Z9L5_MOUSE Sentrin-specific protease 3 (Fragment) OS=Mus musculus OX=10090 GN=Senp3 PE=1 SV=1;sp|Q9EP97|SENP3_MOUSE Sentrin-specific protease 3 OS=Mus musculus OX=10090 GN=Senp3 PE=1 SV=1	2	1	1	1	0	0	0	1	0	0	0	1	0	0	0	1	7.1	7.1	7.1	19.88	169	169;568	0	3.4819				By MS/MS	NaN	NaN	NaN	1	1	Median	NaN	NaN	NaN	NaN	NaN	NaN	NaN	NaN
Q7M739;F6ZDS4;F6RX08	Q7M739;F6ZDS4	10;10;1	10;10;1	10;10;1	Nucleoprotein TPR	Tpr	tr|Q7M739|Q7M739_MOUSE Nuclear pore complex-associated intranuclear coiled-coil protein TPR OS=Mus musculus OX=10090 GN=Tpr PE=1 SV=1;sp|F6ZDS4|TPR_MOUSE Nucleoprotein TPR OS=Mus musculus OX=10090 GN=Tpr PE=1 SV=1	3	10	10	10	6	5	4	3	6	5	4	3	6	5	4	3	4.8	4.8	4.8	266.92	2357	2357;2431;611	0	41.066	By MS/MS	By MS/MS	By MS/MS	By MS/MS	0.15385	0.20204	138.74	10	9	Median	0.15385	0.027967	NaN	0.12838	0.20204	0.033343	NaN	0.1603
F6ZFT1;F8WJ64;Q9CR21	F6ZFT1;F8WJ64;Q9CR21	2;2;2	2;2;2	2;2;2	Acyl carrier protein;Acyl carrier protein, mitochondrial	Ndufab1	tr|F6ZFT1|F6ZFT1_MOUSE Acyl carrier protein (Fragment) OS=Mus musculus OX=10090 GN=Ndufab1 PE=1 SV=1;tr|F8WJ64|F8WJ64_MOUSE Acyl carrier protein (Fragment) OS=Mus musculus OX=10090 GN=Ndufab1 PE=1 SV=1;sp|Q9CR21|ACPM_MOUSE Acyl carrier protein, mitochondri	3	2	2	2	2	1	1	2	2	1	1	2	2	1	1	2	18.9	18.9	18.9	14.309	127	127;128;156	0	6.752	By MS/MS	By MS/MS	By MS/MS	By MS/MS	0.57707	0.81872	7.435	12	0	Leave out requantified	0.40997	0.43664	0.55029	0.77097	0.58235	0.72902	0.79812	0.95888
F6ZL69;Q80TM9	F6ZL69;Q80TM9	1;1	1;1	1;1	Nischarin	Nisch	tr|F6ZL69|F6ZL69_MOUSE Nischarin (Fragment) OS=Mus musculus OX=10090 GN=Nisch PE=1 SV=1;sp|Q80TM9|NISCH_MOUSE Nischarin OS=Mus musculus OX=10090 GN=Nisch PE=1 SV=2	2	1	1	1	1	1	1	1	1	1	1	1	1	1	1	1	11.4	11.4	11.4	16.398	149	149;1593	0	3.894	By MS/MS	By MS/MS	By MS/MS	By MS/MS	0.61112	0.83699	9.4763	4	1	Median	NaN	NaN	NaN	NaN	NaN	NaN	NaN	NaN
F7ASU3;Q8BG51	F7ASU3;Q8BG51	1;1	1;1	1;1	Mitochondrial Rho GTPase 1	Rhot1	tr|F7ASU3|F7ASU3_MOUSE Mitochondrial Rho GTPase 1 (Fragment) OS=Mus musculus OX=10090 GN=Rhot1 PE=1 SV=1;sp|Q8BG51|MIRO1_MOUSE Mitochondrial Rho GTPase 1 OS=Mus musculus OX=10090 GN=Rhot1 PE=1 SV=1	2	1	1	1	1	0	0	1	1	0	0	1	1	0	0	1	2.3	2.3	2.3	49.932	434	434;631	0.0084388	1.5727	By MS/MS			By MS/MS	NaN	NaN	NaN	0	0	Median	NaN	NaN	NaN	NaN	NaN	NaN	NaN	NaN
F7BX26;Q60676	F7BX26;Q60676	5;5	5;5	5;5	Serine/threonine-protein phosphatase;Serine/threonine-protein phosphatase 5	Ppp5c	tr|F7BX26|F7BX26_MOUSE Serine/threonine-protein phosphatase (Fragment) OS=Mus musculus OX=10090 GN=Ppp5c PE=1 SV=1;sp|Q60676|PPP5_MOUSE Serine/threonine-protein phosphatase 5 OS=Mus musculus OX=10090 GN=Ppp5c PE=1 SV=3	2	5	5	5	3	3	4	3	3	3	4	3	3	3	4	3	14.1	14.1	14.1	54.205	476	476;499	0	27.935	By MS/MS	By MS/MS	By MS/MS	By MS/MS	0.035745	0.049794	114.42	3	3	Median	NaN	NaN	0.094	NaN	NaN	NaN	0.10452	NaN
F7CBP1;G3XA17;Q62448;F6UU81	F7CBP1;G3XA17;Q62448	6;6;5;1	6;6;5;1	6;6;5;1	Eukaryotic translation initiation factor 4 gamma 2	Eif4g2	tr|F7CBP1|F7CBP1_MOUSE Eukaryotic translation initiation factor 4 gamma 2 OS=Mus musculus OX=10090 GN=Eif4g2 PE=1 SV=1;tr|G3XA17|G3XA17_MOUSE Eukaryotic translation initiation factor 4 gamma 2 OS=Mus musculus OX=10090 GN=Eif4g2 PE=1 SV=1;sp|Q62448|IF4G2_MO	4	6	6	6	2	5	4	4	2	5	4	4	2	5	4	4	7	7	7	97.888	868	868;906;906;158	0	11.305	By MS/MS	By MS/MS	By MS/MS	By MS/MS	0.76587	0.99736	19.156	14	5	Leave out requantified	0.63497	0.49743	0.59187	0.77503	0.89516	0.85612	0.85698	0.94073
F8VPP8	F8VPP8	1	1	1		Zc3h7b	tr|F8VPP8|F8VPP8_MOUSE Zinc finger CCCH type-containing 7B OS=Mus musculus OX=10090 GN=Zc3h7b PE=1 SV=1	1	1	1	1	1	0	0	0	1	0	0	0	1	0	0	0	1.4	1.4	1.4	110.29	982	982	0.0025733	2.2119	By MS/MS				NaN	NaN	NaN	1	1	Median	NaN	NaN	NaN	NaN	NaN	NaN	NaN	NaN
F8VPY2;Q8C092	F8VPY2;Q8C092	1;1	1;1	1;1	Transcription initiation factor TFIID subunit 5	Taf5	tr|F8VPY2|F8VPY2_MOUSE Transcription initiation factor TFIID subunit 5 OS=Mus musculus OX=10090 GN=Taf5 PE=1 SV=1;sp|Q8C092|TAF5_MOUSE Transcription initiation factor TFIID subunit 5 OS=Mus musculus OX=10090 GN=Taf5 PE=1 SV=1	2	1	1	1	0	0	0	1	0	0	0	1	0	0	0	1	1.4	1.4	1.4	86.951	801	801;801	0.0025523	2.1536				By MS/MS	NaN	NaN	NaN	0	0	Median	NaN	NaN	NaN	NaN	NaN	NaN	NaN	NaN
H3BKT5;F8WI65;F8WGT1;Q80SW1;Q68FL4	H3BKT5;F8WI65;F8WGT1;Q80SW1;Q68FL4	2;2;2;2;2	2;2;2;2;2	2;2;2;2;2	Adenosylhomocysteinase;Putative adenosylhomocysteinase 2;Putative adenosylhomocysteinase 3	Ahcyl2;Ahcyl1	tr|H3BKT5|H3BKT5_MOUSE Adenosylhomocysteinase OS=Mus musculus OX=10090 GN=Ahcyl2 PE=1 SV=1;tr|F8WI65|F8WI65_MOUSE Adenosylhomocysteinase OS=Mus musculus OX=10090 GN=Ahcyl2 PE=1 SV=1;tr|F8WGT1|F8WGT1_MOUSE Adenosylhomocysteinase OS=Mus musculus OX=10090 GN=	5	2	2	2	1	0	0	2	1	0	0	2	1	0	0	2	6.4	6.4	6.4	45.055	404	404;508;612;530;613	0	5.2281	By MS/MS			By MS/MS	9.3958	0.93987	156.57	3	1	Plateau	NaN	NaN	NaN	2.8278	NaN	NaN	NaN	3.564
F8WHL2;Q8CIE6;F6XJN3	F8WHL2;Q8CIE6	13;13;3	13;13;3	13;13;3	Coatomer subunit alpha;Coatomer subunit alpha;Xenin;Proxenin	Copa	tr|F8WHL2|F8WHL2_MOUSE Coatomer subunit alpha OS=Mus musculus OX=10090 GN=Copa PE=1 SV=1;sp|Q8CIE6|COPA_MOUSE Coatomer subunit alpha OS=Mus musculus OX=10090 GN=Copa PE=1 SV=2	3	13	13	13	5	9	4	6	5	9	4	6	5	9	4	6	14.5	14.5	14.5	139.41	1233	1233;1224;143	0	34.282	By MS/MS	By MS/MS	By MS/MS	By MS/MS	0.72659	1.0577	27.856	23	14	Leave out requantified	0.78895	0.61557	0.66551	0.78646	1.1016	1.0364	0.95669	0.96724
F8WHM5;Q61543;F6RSH1	F8WHM5;Q61543	3;3;1	3;3;1	3;3;1	Golgi apparatus protein 1	Glg1	tr|F8WHM5|F8WHM5_MOUSE Golgi apparatus protein 1 (Fragment) OS=Mus musculus OX=10090 GN=Glg1 PE=1 SV=1;sp|Q61543|GSLG1_MOUSE Golgi apparatus protein 1 OS=Mus musculus OX=10090 GN=Glg1 PE=1 SV=1	3	3	3	3	0	2	2	0	0	2	2	0	0	2	2	0	2.9	2.9	2.9	132.35	1163	1163;1175;591	0	6.5869		By MS/MS	By MS/MS		0.33788	0.38903	21.526	2	2	Median	NaN	NaN	NaN	NaN	NaN	NaN	NaN	NaN
F8WHP8;P56135	F8WHP8;P56135	3;3	3;3	3;3	ATP synthase subunit f, mitochondrial	Atp5j2	tr|F8WHP8|F8WHP8_MOUSE ATP synthase subunit f, mitochondrial OS=Mus musculus OX=10090 GN=Atp5j2 PE=1 SV=1;sp|P56135|ATPK_MOUSE ATP synthase subunit f, mitochondrial OS=Mus musculus OX=10090 GN=Atp5j2 PE=1 SV=3	2	3	3	3	2	3	3	2	2	3	3	2	2	3	3	2	31.6	31.6	31.6	9.0054	76	76;88	0	10.535	By MS/MS	By MS/MS	By MS/MS	By MS/MS	0.2025	0.23056	68.468	8	8	Median	0.29944	0.10468	0.10912	0.22496	0.36852	0.11927	0.12008	0.26709
F8WHR6;Q569Z5	F8WHR6;Q569Z5	3;3	3;3	3;3	Probable ATP-dependent RNA helicase DDX46	Ddx46	tr|F8WHR6|F8WHR6_MOUSE Probable ATP-dependent RNA helicase DDX46 OS=Mus musculus OX=10090 GN=Ddx46 PE=1 SV=1;sp|Q569Z5|DDX46_MOUSE Probable ATP-dependent RNA helicase DDX46 OS=Mus musculus OX=10090 GN=Ddx46 PE=1 SV=2	2	3	3	3	2	0	0	1	2	0	0	1	2	0	0	1	3.2	3.2	3.2	117	1028	1028;1032	0	7.4648	By MS/MS			By MS/MS	NaN	NaN	NaN	1	1	Median	NaN	NaN	NaN	NaN	NaN	NaN	NaN	NaN
F8WHU5;Q4VA53	F8WHU5;Q4VA53	5;5	4;4	4;4	Sister chromatid cohesion protein PDS5 homolog B	Pds5b	tr|F8WHU5|F8WHU5_MOUSE Sister chromatid cohesion protein PDS5 homolog B OS=Mus musculus OX=10090 GN=Pds5b PE=1 SV=1;sp|Q4VA53|PDS5B_MOUSE Sister chromatid cohesion protein PDS5 homolog B OS=Mus musculus OX=10090 GN=Pds5b PE=1 SV=1	2	5	4	4	5	3	3	4	4	2	2	4	4	2	2	4	4.1	3.2	3.2	164.76	1449	1449;1446	0	11.196	By MS/MS	By MS/MS	By MS/MS	By MS/MS	0.1762	0.21006	129.82	10	6	Median	0.2013	0.21897	0.22408	0.13855	0.28178	0.30716	0.24917	0.1771
F8WHU9;Q62384	F8WHU9;Q62384	2;2	2;2	2;2	Zinc finger protein ZPR1	Zpr1	tr|F8WHU9|F8WHU9_MOUSE Zinc finger protein ZPR1 (Fragment) OS=Mus musculus OX=10090 GN=Zpr1 PE=1 SV=1;sp|Q62384|ZPR1_MOUSE Zinc finger protein ZPR1 OS=Mus musculus OX=10090 GN=Zpr1 PE=1 SV=1	2	2	2	2	2	1	2	1	2	1	2	1	2	1	2	1	5.4	5.4	5.4	42.327	386	386;459	0	3.6346	By MS/MS	By MS/MS	By MS/MS	By MS/MS	1.1198	1.7367	149.02	5	5	Median	0.50005	NaN	0.3224	NaN	0.7066	NaN	0.40529	NaN
F8WIB1;P61211	F8WIB1;P61211	1;1	1;1	1;1	ADP-ribosylation factor-like protein 1	Arl1	tr|F8WIB1|F8WIB1_MOUSE ADP-ribosylation factor-like protein 1 (Fragment) OS=Mus musculus OX=10090 GN=Arl1 PE=1 SV=1;sp|P61211|ARL1_MOUSE ADP-ribosylation factor-like protein 1 OS=Mus musculus OX=10090 GN=Arl1 PE=1 SV=1	2	1	1	1	1	1	1	1	1	1	1	1	1	1	1	1	6.5	6.5	6.5	15.65	138	138;181	0.0044357	1.9157	By matching	By MS/MS	By MS/MS	By MS/MS	0.75128	1.0721	4.8886	4	0	Median	NaN	NaN	NaN	NaN	NaN	NaN	NaN	NaN
F8WIK0;Q8WTY4;F7BWP1;E0CYY1	F8WIK0;Q8WTY4;F7BWP1	5;5;3;2	5;5;3;2	5;5;3;2	Anamorsin	Ciapin1	tr|F8WIK0|F8WIK0_MOUSE Anamorsin OS=Mus musculus OX=10090 GN=Ciapin1 PE=1 SV=2;sp|Q8WTY4|CPIN1_MOUSE Anamorsin OS=Mus musculus OX=10090 GN=Ciapin1 PE=1 SV=1;tr|F7BWP1|F7BWP1_MOUSE Anamorsin (Fragment) OS=Mus musculus OX=10090 GN=Ciapin1 PE=1 SV=2	4	5	5	5	5	4	4	4	5	4	4	4	5	4	4	4	28.2	28.2	28.2	33.429	309	309;309;254;152	0	30.127	By MS/MS	By MS/MS	By MS/MS	By MS/MS	0.80984	1.1745	2.108	14	5	Leave out requantified	0.82081	0.82701	0.79185	0.91971	1.1608	1.4505	1.1571	1.1408
F8WIR1;P18242;A0A1B0GT66;F6Y6L6	F8WIR1;P18242;A0A1B0GT66;F6Y6L6	6;6;4;4	6;6;4;4	6;6;4;4	Cathepsin D	Ctsd	tr|F8WIR1|F8WIR1_MOUSE Cathepsin D OS=Mus musculus OX=10090 GN=Ctsd PE=1 SV=2;sp|P18242|CATD_MOUSE Cathepsin D OS=Mus musculus OX=10090 GN=Ctsd PE=1 SV=1;tr|A0A1B0GT66|A0A1B0GT66_MOUSE Uncharacterized protein (Fragment) OS=Mus musculus OX=10090 GN=Gm49369	4	6	6	6	5	5	6	5	5	5	6	5	5	5	6	5	19.6	19.6	19.6	44.215	404	404;410;273;278	0	17.101	By MS/MS	By MS/MS	By MS/MS	By MS/MS	0.95329	1.4299	8.3802	28	2	Leave out requantified	1.0265	0.85797	0.98853	1.1471	1.4601	1.4783	1.4414	1.4075
F8WIT2;P14824	F8WIT2;P14824	28;28	28;28	28;28	Annexin;Annexin A6	Anxa6	tr|F8WIT2|F8WIT2_MOUSE Annexin OS=Mus musculus OX=10090 GN=Anxa6 PE=1 SV=1;sp|P14824|ANXA6_MOUSE Annexin A6 OS=Mus musculus OX=10090 GN=Anxa6 PE=1 SV=3	2	28	28	28	19	25	20	20	19	25	20	20	19	25	20	20	45.3	45.3	45.3	75.288	667	667;673	0	96.945	By MS/MS	By MS/MS	By MS/MS	By MS/MS	0.68797	0.98843	11.157	85	45	Leave out requantified	0.69392	0.57169	0.64632	0.79385	0.97789	0.96162	0.95863	0.96342
Q3T9X3;Q3TCR7;G3X9G4;F8WIV5;P39054;G3UZZ3	Q3T9X3;Q3TCR7;G3X9G4;F8WIV5;P39054;G3UZZ3	5;5;5;5;5;4	5;5;5;5;5;4	1;1;1;1;1;1	Dynamin-2	Dnm2	tr|Q3T9X3|Q3T9X3_MOUSE Dynamin-2 OS=Mus musculus OX=10090 GN=Dnm2 PE=1 SV=1;tr|Q3TCR7|Q3TCR7_MOUSE Dynamin-2 OS=Mus musculus OX=10090 GN=Dnm2 PE=1 SV=1;tr|G3X9G4|G3X9G4_MOUSE Dynamin-2 OS=Mus musculus OX=10090 GN=Dnm2 PE=1 SV=1;tr|F8WIV5|F8WIV5_MOUSE Dynam	6	5	5	1	3	3	2	3	3	3	2	3	0	1	1	0	7	7	1	97.194	860	860;869;870;870;870;807	0	12.663	By MS/MS	By MS/MS	By MS/MS	By MS/MS	0.70252	0.94611	3.913	8	2	Leave out requantified	0.5857	0.67	NaN	0.79231	0.79293	1.1193	NaN	0.96834
F8WJG3;P62996	F8WJG3;P62996	7;7	7;7	6;6	Transformer-2 protein homolog beta	Tra2b	tr|F8WJG3|F8WJG3_MOUSE Transformer-2 protein homolog beta OS=Mus musculus OX=10090 GN=Tra2b PE=1 SV=1;sp|P62996|TRA2B_MOUSE Transformer-2 protein homolog beta OS=Mus musculus OX=10090 GN=Tra2b PE=1 SV=1	2	7	7	6	3	6	7	3	3	6	7	3	3	6	6	3	36.7	36.7	36.7	21.935	188	188;288	0	25.578	By MS/MS	By MS/MS	By MS/MS	By MS/MS	0.28017	0.28352	158.69	14	9	Median	0.12221	0.58011	0.10945	0.14213	0.14969	0.61041	0.1192	0.15674
G3UVU2;D3Z5A6;D3YW09;Q62203	G3UVU2;D3Z5A6;D3YW09;Q62203	3;2;2;2	3;2;2;2	3;2;2;2	Splicing factor 3A subunit 2	Sf3a2	tr|G3UVU2|G3UVU2_MOUSE Splicing factor 3A subunit 2 OS=Mus musculus OX=10090 GN=Sf3a2 PE=1 SV=1;tr|D3Z5A6|D3Z5A6_MOUSE Splicing factor 3A subunit 2 (Fragment) OS=Mus musculus OX=10090 GN=Sf3a2 PE=1 SV=1;tr|D3YW09|D3YW09_MOUSE Splicing factor 3A subunit 2 O	4	3	3	3	2	3	1	2	2	3	1	2	2	3	1	2	6.2	6.2	6.2	51.278	485	485;67;194;475	0	11.212	By MS/MS	By MS/MS	By MS/MS	By MS/MS	0.84642	1.1221	32.159	2	0	Median	NaN	NaN	NaN	NaN	NaN	NaN	NaN	NaN
G3UVV4;P17710;Q91W97;D3YYR4;D3Z365;E9Q9M6	G3UVV4;P17710	18;18;3;2;2;1	18;18;3;2;2;1	15;15;2;1;1;0	Hexokinase;Hexokinase-1	Hk1	tr|G3UVV4|G3UVV4_MOUSE Hexokinase 1, isoform CRA_f OS=Mus musculus OX=10090 GN=Hk1 PE=1 SV=1;sp|P17710|HXK1_MOUSE Hexokinase-1 OS=Mus musculus OX=10090 GN=Hk1 PE=1 SV=3	6	18	18	15	10	14	12	13	10	14	12	13	8	11	10	11	20.7	20.7	17.8	101.87	917	917;974;915;184;223;43	0	56.11	By MS/MS	By MS/MS	By MS/MS	By MS/MS	0.55907	0.69435	12.98	39	24	Leave out requantified	0.58267	0.42877	0.52636	0.58024	0.83759	0.72557	0.76247	0.70349
G3UWE1;Q52L67;Q9CY27;A0A1D5RLH3;Q3TAN8	G3UWE1;Q52L67;Q9CY27;A0A1D5RLH3;Q3TAN8	2;2;2;1;1	2;2;2;1;1	2;2;2;1;1	Very-long-chain enoyl-CoA reductase	Tecr	tr|G3UWE1|G3UWE1_MOUSE MCG11048, isoform CRA_c OS=Mus musculus OX=10090 GN=Tecr PE=1 SV=1;tr|Q52L67|Q52L67_MOUSE Gpsn2 protein OS=Mus musculus OX=10090 GN=Tecr PE=1 SV=1;sp|Q9CY27|TECR_MOUSE Very-long-chain enoyl-CoA reductase OS=Mus musculus OX=10090 GN=T	5	2	2	2	1	1	0	2	1	1	0	2	1	1	0	2	6.8	6.8	6.8	34.244	293	293;362;308;92;177	0	3.7451	By MS/MS	By MS/MS		By MS/MS	NaN	NaN	NaN	1	1	Median	NaN	NaN	NaN	NaN	NaN	NaN	NaN	NaN
G3UWF3;Z4YL87;H7BWY8;Q8C8T8	G3UWF3;Z4YL87;H7BWY8;Q8C8T8	1;1;1;1	1;1;1;1	1;1;1;1	Pre-rRNA-processing protein TSR2 homolog	Tsr2	tr|G3UWF3|G3UWF3_MOUSE Pre-rRNA-processing protein TSR2 homolog OS=Mus musculus OX=10090 GN=Tsr2 PE=1 SV=1;tr|Z4YL87|Z4YL87_MOUSE Pre-rRNA-processing protein TSR2 homolog OS=Mus musculus OX=10090 GN=Tsr2 PE=1 SV=1;tr|H7BWY8|H7BWY8_MOUSE Pre-rRNA-processing	4	1	1	1	0	0	0	1	0	0	0	1	0	0	0	1	22.9	22.9	22.9	3.8735	35	35;192;195;191	0.0080075	1.6015				By MS/MS	NaN	NaN	NaN	0	0	Median	NaN	NaN	NaN	NaN	NaN	NaN	NaN	NaN
G3UZ60;G3UWI9;G3UWX9;G3UZA7;Q9Z172	G3UZ60;G3UWI9;G3UWX9;G3UZA7;Q9Z172	2;2;2;2;2	1;1;1;1;1	1;1;1;1;1	Small ubiquitin-related modifier;Small ubiquitin-related modifier 3	Sumo3	tr|G3UZ60|G3UZ60_MOUSE Small ubiquitin-related modifier 3 OS=Mus musculus OX=10090 GN=Gm49325 PE=1 SV=1;tr|G3UWI9|G3UWI9_MOUSE SMT3 suppressor of mif two 3 homolog 3 (Yeast), isoform CRA_c OS=Mus musculus OX=10090 GN=Sumo3 PE=1 SV=1;tr|G3UWX9|G3UWX9_MOUSE	5	2	1	1	2	2	2	2	1	1	1	1	1	1	1	1	28	12	12	8.6017	75	75;82;96;113;110	0	4.1265	By MS/MS	By MS/MS	By MS/MS	By MS/MS	0.73011	1.0517	6.4591	8	0	Median	0.79694	0.60496	0.69033	0.91087	1.1237	1.0149	1.0012	1.1127
G3UWX7;Q62176;G3UXG4;D3Z4I3	G3UWX7;Q62176;G3UXG4;D3Z4I3	2;2;1;1	2;2;1;1	2;2;1;1	RNA-binding protein 38;RNA-binding protein 24	Rbm38;Rbm24	tr|G3UWX7|G3UWX7_MOUSE RNA-binding protein 38 (Fragment) OS=Mus musculus OX=10090 GN=Rbm38 PE=1 SV=1;sp|Q62176|RBM38_MOUSE RNA-binding protein 38 OS=Mus musculus OX=10090 GN=Rbm38 PE=1 SV=2;tr|G3UXG4|G3UXG4_MOUSE RNA-binding protein 38 (Fragment) OS=Mus mu	4	2	2	2	2	2	1	2	2	2	1	2	2	2	1	2	24.8	24.8	24.8	13.34	125	125;237;29;236	0	5.538	By MS/MS	By MS/MS	By matching	By MS/MS	0.80561	1.0151	4.0897	5	0	Linear	NaN	0.60745	NaN	NaN	NaN	1.0151	NaN	NaN
G3UX26;Q60930;D3YZT5;A0A286YCR8;D3YUN8	G3UX26;Q60930;D3YZT5;A0A286YCR8	7;7;5;5;2	7;7;5;5;2	7;7;5;5;2	Voltage-dependent anion-selective channel protein 2	Vdac2	tr|G3UX26|G3UX26_MOUSE Voltage-dependent anion-selective channel protein 2 OS=Mus musculus OX=10090 GN=Vdac2 PE=1 SV=1;sp|Q60930|VDAC2_MOUSE Voltage-dependent anion-selective channel protein 2 OS=Mus musculus OX=10090 GN=Vdac2 PE=1 SV=2;tr|D3YZT5|D3YZT5_MO	5	7	7	7	4	7	7	4	4	7	7	4	4	7	7	4	25.1	25.1	25.1	30.446	283	283;295;201;246;75	0	16.149	By MS/MS	By MS/MS	By MS/MS	By MS/MS	0.61448	0.87266	31.384	22	4	Leave out requantified	0.69291	0.49755	0.63767	0.70789	0.98263	0.83295	0.93004	0.89111
G8JL74;G3UXA6;Q8BHD7;G3UZ01;G3UXZ8;F7C521;G3UY95;A0A1W2P7W3;B2RU80	G8JL74;G3UXA6;Q8BHD7;G3UZ01	6;6;6;5;2;1;1;1;1	3;3;3;3;1;0;0;0;0	3;3;3;3;1;0;0;0;0	Polypyrimidine tract-binding protein 3	Ptbp3	tr|G8JL74|G8JL74_MOUSE Polypyrimidine tract-binding protein 3 OS=Mus musculus OX=10090 GN=Ptbp3 PE=1 SV=1;tr|G3UXA6|G3UXA6_MOUSE Polypyrimidine tract-binding protein 3 OS=Mus musculus OX=10090 GN=Ptbp3 PE=1 SV=1;sp|Q8BHD7|PTBP3_MOUSE Polypyrimidine tract-b	9	6	3	3	2	5	6	2	0	2	3	1	0	2	3	1	12.7	8.2	8.2	59.465	551	551;554;523;457;188;104;146;2285;1998	0	11.909	By matching	By MS/MS	By MS/MS	By MS/MS	0.15192	0.17492	123.37	2	2	Median	NaN	NaN	NaN	NaN	NaN	NaN	NaN	NaN
G3UXL2;Q9D7G0;Q9CS42	G3UXL2;Q9D7G0;Q9CS42	7;7;4	7;7;4	4;4;2	Ribose-phosphate pyrophosphokinase 1;Ribose-phosphate pyrophosphokinase 2	Prps1l3;Prps1;Prps2	tr|G3UXL2|G3UXL2_MOUSE Phosphoribosyl pyrophosphate synthetase 1-like 3 OS=Mus musculus OX=10090 GN=Prps1l3 PE=3 SV=1;sp|Q9D7G0|PRPS1_MOUSE Ribose-phosphate pyrophosphokinase 1 OS=Mus musculus OX=10090 GN=Prps1 PE=1 SV=4;sp|Q9CS42|PRPS2_MOUSE Ribose-phosph	3	7	7	4	5	5	6	6	5	5	6	6	3	3	4	4	24.8	24.8	13.2	34.824	318	318;318;318	0	17.223	By MS/MS	By MS/MS	By MS/MS	By MS/MS	1.0195	1.2931	165.46	20	14	Leave out requantified	0.24815	0.27513	0.54253	0.46862	0.34568	0.32802	0.68567	0.58445
G3UXT7;Q8CFQ9;P56959;G3UZD2;Q91VQ2	G3UXT7;Q8CFQ9;P56959	6;6;6;1;1	6;6;6;1;1	4;4;4;1;1	RNA-binding protein FUS	Fus	tr|G3UXT7|G3UXT7_MOUSE RNA-binding protein FUS (Fragment) OS=Mus musculus OX=10090 GN=Fus PE=1 SV=1;tr|Q8CFQ9|Q8CFQ9_MOUSE Fusion, derived from t(1216) malignant liposarcoma (Human) OS=Mus musculus OX=10090 GN=Fus PE=1 SV=1;sp|P56959|FUS_MOUSE RNA-binding	5	6	6	4	3	6	5	3	3	6	5	3	2	4	3	2	48.5	48.5	41.5	13.897	130	130;517;518;104;280	0	24.964	By MS/MS	By MS/MS	By MS/MS	By MS/MS	0.73449	1.0747	3.339	19	1	Leave out requantified	0.73346	0.65741	0.73145	0.92128	1.0411	1.1008	1.0701	1.1584
G3UXX3;Q91XH5;Q64105;G3UZ79	G3UXX3;Q91XH5;Q64105	7;7;6;2	7;7;6;2	7;7;6;2	Sepiapterin reductase	Spr	tr|G3UXX3|G3UXX3_MOUSE Sepiapterin reductase OS=Mus musculus OX=10090 GN=Spr PE=1 SV=1;tr|Q91XH5|Q91XH5_MOUSE Sepiapterin reductase OS=Mus musculus OX=10090 GN=Spr PE=1 SV=1;sp|Q64105|SPRE_MOUSE Sepiapterin reductase OS=Mus musculus OX=10090 GN=Spr PE=1 SV	4	7	7	7	3	5	4	4	3	5	4	4	3	5	4	4	47	47	47	23.357	219	219;262;261;126	0	27.533	By MS/MS	By MS/MS	By MS/MS	By MS/MS	0.74997	1.058	36.312	10	2	Leave out requantified	0.74289	0.65175	0.71429	0.94614	1.0466	1.0754	1.0287	1.1401
G3UXZ5;P97371;G3UXY0;G3X9K9;G3UWN9;G3UXR1	G3UXZ5;P97371;G3UXY0;G3X9K9;G3UWN9	11;11;10;8;7;1	11;11;10;8;7;1	11;11;10;8;7;1	Proteasome activator complex subunit 1	Psme1	tr|G3UXZ5|G3UXZ5_MOUSE Proteasome activator complex subunit 1 (Fragment) OS=Mus musculus OX=10090 GN=Psme1 PE=1 SV=1;sp|P97371|PSME1_MOUSE Proteasome activator complex subunit 1 OS=Mus musculus OX=10090 GN=Psme1 PE=1 SV=2;tr|G3UXY0|G3UXY0_MOUSE Proteasome	6	11	11	11	8	7	10	10	8	7	10	10	8	7	10	10	46.2	46.2	46.2	27.411	238	238;249;226;236;173;42	0	33.926	By MS/MS	By MS/MS	By MS/MS	By MS/MS	0.7552	1.0877	24.937	32	9	Leave out requantified	0.75857	0.66641	0.77071	0.87544	1.1102	1.128	1.1247	1.067
G3UY42;Q8CCS6;D3YUB9;D3Z055;G3UWS5;D3Z5F7;G3UX74;B7ZP52;Q5XFR0	G3UY42;Q8CCS6;D3YUB9;D3Z055;G3UWS5;D3Z5F7	4;4;3;3;3;3;1;1;1	4;4;3;3;3;3;1;1;1	4;4;3;3;3;3;1;1;1	Polyadenylate-binding protein 2	Pabpn1;Gm20521	tr|G3UY42|G3UY42_MOUSE Polyadenylate-binding protein 2 OS=Mus musculus OX=10090 GN=Pabpn1 PE=1 SV=1;sp|Q8CCS6|PABP2_MOUSE Polyadenylate-binding protein 2 OS=Mus musculus OX=10090 GN=Pabpn1 PE=1 SV=3;tr|D3YUB9|D3YUB9_MOUSE Polyadenylate-binding protein 2 (F	9	4	4	4	2	2	3	2	2	2	3	2	2	2	3	2	13.2	13.2	13.2	34.003	319	319;302;164;168;178;333;73;288;273	0	11.521	By MS/MS	By MS/MS	By MS/MS	By MS/MS	0.32164	0.41113	66.633	9	5	Median	0.39744	0.33934	0.25008	0.56656	0.55047	0.57004	0.36449	0.70076
G3UYD0;Q3UHU8;Q9ESZ8;G3UYJ6;G3UWV2;G3UYD7;G3UZU4	G3UYD0;Q3UHU8;Q9ESZ8	7;7;7;3;2;1;1	7;7;7;3;2;1;1	7;7;7;3;2;1;1	General transcription factor II-I	Gtf2i	tr|G3UYD0|G3UYD0_MOUSE General transcription factor II-I OS=Mus musculus OX=10090 GN=Gtf2i PE=1 SV=1;tr|Q3UHU8|Q3UHU8_MOUSE General transcription factor II-I OS=Mus musculus OX=10090 GN=Gtf2i PE=1 SV=1;sp|Q9ESZ8|GTF2I_MOUSE General transcription factor II-	7	7	7	7	4	4	3	5	4	4	3	5	4	4	3	5	9.7	9.7	9.7	103.08	913	913;962;998;437;169;150;159	0	21.221	By MS/MS	By MS/MS	By MS/MS	By MS/MS	0.88867	1.1467	15.296	16	7	Leave out requantified	0.21028	0.68751	0.82243	0.87999	0.29877	1.1482	1.167	1.0738
Q8CFZ0;G3UYP0;P63280;G3UWL6;G3UWJ1	Q8CFZ0;G3UYP0;P63280	5;5;5;1;1	5;5;5;1;1	5;5;5;1;1	SUMO-conjugating enzyme UBC9	Ube2i	tr|Q8CFZ0|Q8CFZ0_MOUSE SUMO-conjugating enzyme UBC9 OS=Mus musculus OX=10090 GN=Ube2i PE=1 SV=1;tr|G3UYP0|G3UYP0_MOUSE SUMO-conjugating enzyme UBC9 (Fragment) OS=Mus musculus OX=10090 GN=Ube2i PE=1 SV=1;sp|P63280|UBC9_MOUSE SUMO-conjugating enzyme UBC9 OS=	5	5	5	5	1	5	3	2	1	5	3	2	1	5	3	2	47.5	47.5	47.5	11.225	101	101;103;158;22;29	0	17.716	By MS/MS	By MS/MS	By MS/MS	By MS/MS	0.72671	1.0994	2.1404	12	1	Leave out requantified	0.76419	0.61504	0.78269	0.89965	1.078	1.0324	1.1421	1.118
G3UYV3;Q64520	G3UYV3;Q64520	1;1	1;1	1;1	Guanylate kinase	Guk1	tr|G3UYV3|G3UYV3_MOUSE Guanylate kinase (Fragment) OS=Mus musculus OX=10090 GN=Guk1 PE=1 SV=1;sp|Q64520|KGUA_MOUSE Guanylate kinase OS=Mus musculus OX=10090 GN=Guk1 PE=1 SV=2	2	1	1	1	0	0	0	1	0	0	0	1	0	0	0	1	51.6	51.6	51.6	3.1937	31	31;198	0	4.8698				By MS/MS	NaN	NaN	NaN	1	1	Median	NaN	NaN	NaN	NaN	NaN	NaN	NaN	NaN
G3UYV7;P62858	G3UYV7;P62858	6;6	6;6	6;6	40S ribosomal protein S28	Rps28	tr|G3UYV7|G3UYV7_MOUSE 40S ribosomal protein S28 (Fragment) OS=Mus musculus OX=10090 GN=Rps28 PE=1 SV=1;sp|P62858|RS28_MOUSE 40S ribosomal protein S28 OS=Mus musculus OX=10090 GN=Rps28 PE=1 SV=1	2	6	6	6	5	5	6	6	5	5	6	6	5	5	6	6	69.6	69.6	69.6	6.3442	56	56;69	0	41.087	By MS/MS	By MS/MS	By MS/MS	By MS/MS	0.03656	0.041084	123.41	16	16	Median	0.020029	0.086157	0.03641	0.029442	0.027901	0.098167	0.040486	0.029437
G3UYY0;V9GXL3;Q9D4Y3;V9GXB9;A2AWL9;A2ANE0	G3UYY0;V9GXL3;Q9D4Y3	3;3;3;1;1;1	1;1;1;1;1;1	1;1;1;1;1;1		Rhox2a;Rhox2e	tr|G3UYY0|G3UYY0_MOUSE Reproductive homeobox 2A OS=Mus musculus OX=10090 GN=Rhox2a PE=4 SV=1;tr|V9GXL3|V9GXL3_MOUSE Reproductive homeobox 2E (Fragment) OS=Mus musculus OX=10090 GN=Rhox2e PE=4 SV=1;tr|Q9D4Y3|Q9D4Y3_MOUSE Reproductive homeobox 2A OS=Mus musc	6	3	1	1	2	3	3	2	0	1	1	1	0	1	1	1	20.2	7.7	7.7	19.831	183	183;191;191;183;191;191	0	3.3276	By matching	By MS/MS	By MS/MS	By MS/MS	NaN	NaN	NaN	1	1	Median	NaN	NaN	NaN	NaN	NaN	NaN	NaN	NaN
G3UZ26;P50431;G3UYY1;G3UZZ9	G3UZ26;P50431;G3UYY1	10;9;7;1	9;8;6;1	9;8;6;1	Serine hydroxymethyltransferase;Serine hydroxymethyltransferase, cytosolic	Shmt1	tr|G3UZ26|G3UZ26_MOUSE Serine hydroxymethyltransferase (Fragment) OS=Mus musculus OX=10090 GN=Shmt1 PE=1 SV=1;sp|P50431|GLYC_MOUSE Serine hydroxymethyltransferase, cytosolic OS=Mus musculus OX=10090 GN=Shmt1 PE=1 SV=3;tr|G3UYY1|G3UYY1_MOUSE Serine hydroxym	4	10	9	9	6	6	9	8	5	5	8	7	5	5	8	7	27.3	24.1	24.1	48.334	439	439;478;441;122	0	57.557	By MS/MS	By MS/MS	By MS/MS	By MS/MS	0.58433	0.83012	2.0564	22	11	Leave out requantified	0.59232	0.47187	0.57353	0.65498	0.83676	0.79889	0.83785	0.80735
G3UZG5;G3UZ63;G3X961;Q921I2	G3UZG5;G3UZ63;G3X961;Q921I2	1;1;1;1	1;1;1;1	1;1;1;1	Kelch domain-containing protein 4	Klhdc4	tr|G3UZG5|G3UZG5_MOUSE Kelch domain-containing protein 4 OS=Mus musculus OX=10090 GN=Klhdc4 PE=1 SV=1;tr|G3UZ63|G3UZ63_MOUSE Kelch domain-containing protein 4 OS=Mus musculus OX=10090 GN=Klhdc4 PE=1 SV=1;tr|G3X961|G3X961_MOUSE Kelch domain containing 4, is	4	1	1	1	1	0	0	1	1	0	0	1	1	0	0	1	2.7	2.7	2.7	58.569	527	527;553;584;584	0	3.3291	By MS/MS			By MS/MS	0.1245	0.16614	55.661	2	2	Median	NaN	NaN	NaN	NaN	NaN	NaN	NaN	NaN
G3UZD6;Q9ES00	G3UZD6;Q9ES00	2;2	2;2	2;2	Ubiquitin conjugation factor E4 B	Ube4b	tr|G3UZD6|G3UZD6_MOUSE Ubiquitin conjugation factor E4 B OS=Mus musculus OX=10090 GN=Ube4b PE=1 SV=1;sp|Q9ES00|UBE4B_MOUSE Ubiquitin conjugation factor E4 B OS=Mus musculus OX=10090 GN=Ube4b PE=1 SV=3	2	2	2	2	1	0	1	1	1	0	1	1	1	0	1	1	2.4	2.4	2.4	113	998	998;1173	0.0015773	2.4016	By matching		By MS/MS	By MS/MS	0.52784	0.69067	1.3575	2	0	Median	NaN	NaN	NaN	NaN	NaN	NaN	NaN	NaN
G3UZJ4;P99029;H3BJQ7	G3UZJ4;P99029;H3BJQ7	5;5;4	5;5;4	5;5;4	Peroxiredoxin-5, mitochondrial	Prdx5	tr|G3UZJ4|G3UZJ4_MOUSE Peroxiredoxin-5, mitochondrial OS=Mus musculus OX=10090 GN=Prdx5 PE=1 SV=1;sp|P99029|PRDX5_MOUSE Peroxiredoxin-5, mitochondrial OS=Mus musculus OX=10090 GN=Prdx5 PE=1 SV=2;tr|H3BJQ7|H3BJQ7_MOUSE Peroxiredoxin-5, mitochondrial OS=Mus	3	5	5	5	4	4	4	4	4	4	4	4	4	4	4	4	31.9	31.9	31.9	17.253	166	166;210;213	0	10.182	By MS/MS	By MS/MS	By MS/MS	By MS/MS	0.61362	0.89101	6.2532	14	7	Leave out requantified	0.66138	0.50797	0.61841	0.72686	0.95904	0.85759	0.90022	0.88244
G3UZK1;Q9CXP8	G3UZK1;Q9CXP8	1;1	1;1	1;1	Guanine nucleotide-binding protein subunit gamma;Guanine nucleotide-binding protein G(I)/G(S)/G(O) subunit gamma-10	Gm20503;Gng10	tr|G3UZK1|G3UZK1_MOUSE Guanine nucleotide-binding protein subunit gamma OS=Mus musculus OX=10090 GN=Gm20503 PE=3 SV=1;sp|Q9CXP8|GBG10_MOUSE Guanine nucleotide-binding protein G(I)/G(S)/G(O) subunit gamma-10 OS=Mus musculus OX=10090 GN=Gng10 PE=3 SV=1	2	1	1	1	0	0	1	0	0	0	1	0	0	0	1	0	12	12	12	16	150	150;68	0.0088744	1.5577			By MS/MS		NaN	NaN	NaN	1	1	Median	NaN	NaN	NaN	NaN	NaN	NaN	NaN	NaN
G3UZY2;P97493	G3UZY2;P97493	1;1	1;1	1;1	Thioredoxin, mitochondrial	Txn2	tr|G3UZY2|G3UZY2_MOUSE Thioredoxin, mitochondrial (Fragment) OS=Mus musculus OX=10090 GN=Txn2 PE=1 SV=1;sp|P97493|THIOM_MOUSE Thioredoxin, mitochondrial OS=Mus musculus OX=10090 GN=Txn2 PE=1 SV=1	2	1	1	1	1	1	1	1	1	1	1	1	1	1	1	1	11.5	11.5	11.5	14.099	130	130;166	0	9.6268	By MS/MS	By MS/MS	By MS/MS	By MS/MS	0.59404	0.88849	17.893	7	3	Median	0.63564	NaN	0.65866	0.74106	0.94914	NaN	0.99643	0.92946
G3UZZ2;Q3TCU5;Q9R233	G3UZZ2;Q3TCU5;Q9R233	1;1;1	1;1;1	1;1;1	Tapasin	Tapbp	tr|G3UZZ2|G3UZZ2_MOUSE Tapasin (Fragment) OS=Mus musculus OX=10090 GN=Tapbp PE=1 SV=1;tr|Q3TCU5|Q3TCU5_MOUSE Tapasin OS=Mus musculus OX=10090 GN=Tapbp PE=1 SV=1;sp|Q9R233|TPSN_MOUSE Tapasin OS=Mus musculus OX=10090 GN=Tapbp PE=1 SV=2	3	1	1	1	0	0	1	1	0	0	1	1	0	0	1	1	10.9	10.9	10.9	12.826	119	119;466;465	1	-2			By MS/MS	By MS/MS	0.14108	0.1682	31.563	2	2	Median	NaN	NaN	NaN	NaN	NaN	NaN	NaN	NaN
G3X8R0;Q60870	G3X8R0;Q60870	1;1	1;1	1;1	Receptor expression-enhancing protein;Receptor expression-enhancing protein 5	Reep5	tr|G3X8R0|G3X8R0_MOUSE Receptor expression-enhancing protein OS=Mus musculus OX=10090 GN=Reep5 PE=1 SV=1;sp|Q60870|REEP5_MOUSE Receptor expression-enhancing protein 5 OS=Mus musculus OX=10090 GN=Reep5 PE=1 SV=1	2	1	1	1	1	1	1	1	1	1	1	1	1	1	1	1	5.3	5.3	5.3	21.447	189	189;185	0	5.0214	By MS/MS	By MS/MS	By MS/MS	By matching	0.47038	0.63232	10.372	4	0	Median	NaN	NaN	NaN	NaN	NaN	NaN	NaN	NaN
G3X8Y3;Q80UM3;A0A0A6YW80;A0A0A6YX86;A0A0A6YXF4;E9PZ53;Q9DBB4	G3X8Y3;Q80UM3;A0A0A6YW80;A0A0A6YX86	8;8;7;5;3;3;3	8;8;7;5;3;3;3	8;8;7;5;3;3;3	N-alpha-acetyltransferase 15, NatA auxiliary subunit	Naa15	tr|G3X8Y3|G3X8Y3_MOUSE N-alpha-acetyltransferase 15, NatA auxiliary subunit OS=Mus musculus OX=10090 GN=Naa15 PE=1 SV=1;sp|Q80UM3|NAA15_MOUSE N-alpha-acetyltransferase 15, NatA auxiliary subunit OS=Mus musculus OX=10090 GN=Naa15 PE=1 SV=1;tr|A0A0A6YW80|A0A	7	8	8	8	3	4	2	4	3	4	2	4	3	4	2	4	8.3	8.3	8.3	101.09	865	865;865;815;237;126;496;864	0	18.012	By MS/MS	By MS/MS	By MS/MS	By MS/MS	1.0244	1.3084	122.66	11	9	Median	1.9704	0.49145	0.26054	1.2587	2.4464	0.85097	0.33202	1.4584
S4R1Y5;G3X926;Q9JJ80;S4R2R2;S4R2H5	S4R1Y5;G3X926;Q9JJ80;S4R2R2;S4R2H5	4;4;4;3;3	4;4;4;3;3	4;4;4;3;3	Ribosome production factor 2 homolog	Rpf2	tr|S4R1Y5|S4R1Y5_MOUSE Ribosome production factor 2 homolog (Fragment) OS=Mus musculus OX=10090 GN=Rpf2 PE=1 SV=1;tr|G3X926|G3X926_MOUSE MCG1407, isoform CRA_a OS=Mus musculus OX=10090 GN=Rpf2 PE=1 SV=1;sp|Q9JJ80|RPF2_MOUSE Ribosome production factor 2 hom	5	4	4	4	0	2	1	2	0	2	1	2	0	2	1	2	17.1	17.1	17.1	29.66	257	257;273;306;153;205	0	9.8999		By MS/MS	By MS/MS	By MS/MS	0.19416	0.23968	129.75	4	4	Median	NaN	NaN	NaN	0.31404	NaN	NaN	NaN	0.40142
G3X928;Q6NZC7	G3X928;Q6NZC7	1;1	1;1	1;1	SEC23-interacting protein	Sec23ip	tr|G3X928|G3X928_MOUSE SEC23-interacting protein OS=Mus musculus OX=10090 GN=Sec23ip PE=1 SV=1;sp|Q6NZC7|S23IP_MOUSE SEC23-interacting protein OS=Mus musculus OX=10090 GN=Sec23ip PE=1 SV=2	2	1	1	1	0	1	1	0	0	1	1	0	0	1	1	0	2.5	2.5	2.5	110.76	998	998;998	0.008	1.6005		By MS/MS	By MS/MS		NaN	NaN	NaN	1	1	Median	NaN	NaN	NaN	NaN	NaN	NaN	NaN	NaN
G3X956;Q920B9	G3X956;Q920B9	9;9	9;9	9;9	FACT complex subunit SPT16	Supt16;Supt16h	tr|G3X956|G3X956_MOUSE Suppressor of Ty 16 OS=Mus musculus OX=10090 GN=Supt16 PE=1 SV=1;sp|Q920B9|SP16H_MOUSE FACT complex subunit SPT16 OS=Mus musculus OX=10090 GN=Supt16h PE=1 SV=2	2	9	9	9	3	4	6	5	3	4	6	5	3	4	6	5	11.9	11.9	11.9	119.84	1047	1047;1047	0	25.483	By MS/MS	By MS/MS	By MS/MS	By MS/MS	0.62978	0.9926	10.663	16	5	Leave out requantified	NaN	0.55986	0.57019	0.75688	NaN	0.99004	0.84692	0.94768
G3X9A7;Q8BLJ3	G3X9A7;Q8BLJ3	2;2	2;2	2;2	PI-PLC X domain-containing protein 3	Plcxd3	tr|G3X9A7|G3X9A7_MOUSE MCG49978 OS=Mus musculus OX=10090 GN=Plcxd3 PE=1 SV=1;sp|Q8BLJ3|PLCX3_MOUSE PI-PLC X domain-containing protein 3 OS=Mus musculus OX=10090 GN=Plcxd3 PE=1 SV=1	2	2	2	2	2	1	2	2	2	1	2	2	2	1	2	2	9	9	9	36.314	321	321;321	0	8.1824	By MS/MS	By MS/MS	By MS/MS	By MS/MS	0.66345	0.96291	48.101	7	3	Median	0.85461	NaN	0.93707	0.9768	1.2152	NaN	1.1969	1.2125
G3X9B1;A0A1Y7VNI1;A0A1Y7VNG8	G3X9B1;A0A1Y7VNI1	4;3;1	4;3;1	4;3;1		Heatr1	tr|G3X9B1|G3X9B1_MOUSE HEAT repeat-containing 1 OS=Mus musculus OX=10090 GN=Heatr1 PE=1 SV=1;tr|A0A1Y7VNI1|A0A1Y7VNI1_MOUSE HEAT repeat-containing 1 (Fragment) OS=Mus musculus OX=10090 GN=Heatr1 PE=1 SV=1	3	4	4	4	2	2	2	4	2	2	2	4	2	2	2	4	2.6	2.6	2.6	242.07	2143	2143;744;344	0	6.2381	By MS/MS	By matching	By MS/MS	By MS/MS	0.59589	0.82767	27.042	8	0	Leave out requantified	0.59708	0.47466	0.77792	0.61724	0.83844	0.80599	1.1539	0.75615
G3X9U9;Q9CQ92	G3X9U9;Q9CQ92	1;1	1;1	1;1	Mitochondrial fission 1 protein	Fis1	tr|G3X9U9|G3X9U9_MOUSE Mitochondrial fission 1 protein OS=Mus musculus OX=10090 GN=Fis1 PE=1 SV=1;sp|Q9CQ92|FIS1_MOUSE Mitochondrial fission 1 protein OS=Mus musculus OX=10090 GN=Fis1 PE=1 SV=1	2	1	1	1	1	1	0	1	1	1	0	1	1	1	0	1	7.6	7.6	7.6	16.265	145	145;152	0.0025549	2.1567	By MS/MS	By MS/MS		By MS/MS	0.94939	1.2107	2.996	3	0	Plateau	NaN	NaN	NaN	NaN	NaN	NaN	NaN	NaN
G3X9V0;P97372;E0CZ90	G3X9V0;P97372	4;4;1	4;4;1	4;4;1	Proteasome activator complex subunit 2	Psme2	tr|G3X9V0|G3X9V0_MOUSE MCG22048, isoform CRA_a OS=Mus musculus OX=10090 GN=Psme2 PE=1 SV=1;sp|P97372|PSME2_MOUSE Proteasome activator complex subunit 2 OS=Mus musculus OX=10090 GN=Psme2 PE=1 SV=4	3	4	4	4	4	3	3	2	4	3	3	2	4	3	3	2	17.3	17.3	17.3	26.159	231	231;239;165	0	13.901	By MS/MS	By MS/MS	By MS/MS	By MS/MS	0.64602	0.99126	130.92	9	5	Median	0.80496	0.5976	0.17075	0.4124	1.1176	0.70345	0.21615	0.51511
G5E8G0;G3X9W0;F6ZV59;Q60668;E9Q5B6;F6SHF3;A0A0G2JFL4;F7A465;Q9D3U4	G5E8G0;G3X9W0;F6ZV59;Q60668;E9Q5B6;F6SHF3	10;10;9;9;5;5;2;1;1	10;10;9;9;5;5;2;1;1	9;9;8;8;4;5;2;1;0	Heterogeneous nuclear ribonucleoprotein D0	Hnrnpd	tr|G5E8G0|G5E8G0_MOUSE Heterogeneous nuclear ribonucleoprotein D, isoform CRA_b OS=Mus musculus OX=10090 GN=Hnrnpd PE=1 SV=1;tr|G3X9W0|G3X9W0_MOUSE Heterogeneous nuclear ribonucleoprotein D, isoform CRA_a OS=Mus musculus OX=10090 GN=Hnrnpd PE=1 SV=1;tr|F6Z	9	10	10	9	7	10	10	6	7	10	10	6	6	9	9	5	28.2	28.2	25.4	30.608	287	287;336;216;355;107;150;25;131;565	0	34.909	By MS/MS	By MS/MS	By MS/MS	By MS/MS	0.73543	1.0791	15.199	36	6	Leave out requantified	0.74278	0.64734	0.68407	0.91386	1.0763	1.0746	1.0448	1.1233
G3XA48;P58044;H3BLP1;H3BLF8;H3BKD7	G3XA48;P58044;H3BLP1;H3BLF8;H3BKD7	2;2;1;1;1	2;2;1;1;1	2;2;1;1;1	Isopentenyl-diphosphate Delta-isomerase 1	Idi1	tr|G3XA48|G3XA48_MOUSE Isopentenyl-diphosphate Delta-isomerase 1 OS=Mus musculus OX=10090 GN=Idi1 PE=1 SV=1;sp|P58044|IDI1_MOUSE Isopentenyl-diphosphate Delta-isomerase 1 OS=Mus musculus OX=10090 GN=Idi1 PE=1 SV=1;tr|H3BLP1|H3BLP1_MOUSE Isopentenyl-diphosp	5	2	2	2	2	2	2	2	2	2	2	2	2	2	2	2	7.4	7.4	7.4	32.477	283	283;227;146;163;163	0	15.607	By MS/MS	By MS/MS	By MS/MS	By MS/MS	0.56776	0.79966	2.9159	8	1	Leave out requantified	0.53258	0.47581	0.59934	0.63947	0.7395	0.80065	0.8688	0.78702
G5E866;Q99NB9	G5E866;Q99NB9	11;11	11;11	11;11	Splicing factor 3B subunit 1	Sf3b1	tr|G5E866|G5E866_MOUSE Splicing factor 3B subunit 1 OS=Mus musculus OX=10090 GN=Sf3b1 PE=1 SV=1;sp|Q99NB9|SF3B1_MOUSE Splicing factor 3B subunit 1 OS=Mus musculus OX=10090 GN=Sf3b1 PE=1 SV=1	2	11	11	11	5	7	10	5	5	7	10	5	5	7	10	5	11.7	11.7	11.7	145.83	1304	1304;1304	0	28.525	By MS/MS	By MS/MS	By MS/MS	By MS/MS	0.6766	0.99304	3.7469	19	6	Leave out requantified	0.71092	0.60376	0.69011	0.8226	1.0028	1.0176	0.99617	1.0148
G5E8R4;Q922D4;A0A286YE88	G5E8R4;Q922D4	3;3;1	3;3;1	3;3;1	Serine/threonine-protein phosphatase 6 regulatory subunit 3	Ppp6r3	tr|G5E8R4|G5E8R4_MOUSE SAPS domain family, member 3, isoform CRA_c OS=Mus musculus OX=10090 GN=Ppp6r3 PE=1 SV=1;sp|Q922D4|PP6R3_MOUSE Serine/threonine-protein phosphatase 6 regulatory subunit 3 OS=Mus musculus OX=10090 GN=Ppp6r3 PE=1 SV=1	3	3	3	3	3	3	3	3	3	3	3	3	3	3	3	3	4.1	4.1	4.1	97.862	873	873;844;252	0	5.0691	By MS/MS	By matching	By MS/MS	By MS/MS	0.68448	0.98675	4.7637	12	1	Leave out requantified	0.67051	0.57131	0.65175	0.82691	0.93898	0.96833	0.96464	1.0055
G5E8R8;Q6P5G6	G5E8R8;Q6P5G6	1;1	1;1	1;1	UBX domain-containing protein 7	Ubxn7	tr|G5E8R8|G5E8R8_MOUSE UBX domain-containing protein 7 OS=Mus musculus OX=10090 GN=Ubxn7 PE=1 SV=1;sp|Q6P5G6|UBXN7_MOUSE UBX domain-containing protein 7 OS=Mus musculus OX=10090 GN=Ubxn7 PE=1 SV=2	2	1	1	1	0	1	1	1	0	1	1	1	0	1	1	1	2.7	2.7	2.7	54.812	489	489;467	0	3.6312		By MS/MS	By MS/MS	By matching	0.81977	1.2102	4.295	3	0	Median	NaN	NaN	NaN	NaN	NaN	NaN	NaN	NaN
G5E8T3;Q9D104	G5E8T3;Q9D104	1;1	1;1	1;1		Srp19	tr|G5E8T3|G5E8T3_MOUSE Signal recognition particle 19 kDa protein OS=Mus musculus OX=10090 GN=Srp19 PE=1 SV=1;tr|Q9D104|Q9D104_MOUSE Signal recognition particle 19 kDa protein OS=Mus musculus OX=10090 GN=Srp19 PE=1 SV=1	2	1	1	1	1	1	1	0	1	1	1	0	1	1	1	0	13.3	13.3	13.3	13.621	120	120;144	0	2.8868	By MS/MS	By MS/MS	By MS/MS		0.32528	0.53187	30.231	3	2	Median	NaN	NaN	NaN	NaN	NaN	NaN	NaN	NaN
G5E902;Q8VEM8	G5E902;Q8VEM8	1;1	1;1	1;1	Phosphate carrier protein, mitochondrial	Slc25a3	tr|G5E902|G5E902_MOUSE MCG10343, isoform CRA_b OS=Mus musculus OX=10090 GN=Slc25a3 PE=1 SV=1;sp|Q8VEM8|MPCP_MOUSE Phosphate carrier protein, mitochondrial OS=Mus musculus OX=10090 GN=Slc25a3 PE=1 SV=1	2	1	1	1	1	0	0	0	1	0	0	0	1	0	0	0	3.4	3.4	3.4	39.736	358	358;357	0	3.8432	By MS/MS				NaN	NaN	NaN	1	1	Median	NaN	NaN	NaN	NaN	NaN	NaN	NaN	NaN
G5E924;Q8R081;G3UY38;G3UY56	G5E924;Q8R081;G3UY38	17;17;13;3	17;17;13;3	17;17;13;3	Heterogeneous nuclear ribonucleoprotein L	Hnrnpl	tr|G5E924|G5E924_MOUSE Heterogeneous nuclear ribonucleoprotein L (Fragment) OS=Mus musculus OX=10090 GN=Hnrnpl PE=1 SV=1;sp|Q8R081|HNRPL_MOUSE Heterogeneous nuclear ribonucleoprotein L OS=Mus musculus OX=10090 GN=Hnrnpl PE=1 SV=2;tr|G3UY38|G3UY38_MOUSE Het	4	17	17	17	13	16	15	12	13	16	15	12	13	16	15	12	40.5	40.5	40.5	66.821	615	615;586;456;201	0	117.64	By MS/MS	By MS/MS	By MS/MS	By MS/MS	0.67593	0.98509	4.0822	75	24	Leave out requantified	0.69546	0.58659	0.69254	0.82632	0.97588	0.98299	1.0017	1.0292
H3BIY9;Q9DBG3;H3BKM0;H3BJ06;Q5SWR0	H3BIY9;Q9DBG3;H3BKM0	16;16;15;4;1	6;6;6;0;0	6;6;6;0;0	AP complex subunit beta;AP-2 complex subunit beta	Ap2b1	tr|H3BIY9|H3BIY9_MOUSE AP complex subunit beta OS=Mus musculus OX=10090 GN=Ap2b1 PE=1 SV=1;sp|Q9DBG3|AP2B1_MOUSE AP-2 complex subunit beta OS=Mus musculus OX=10090 GN=Ap2b1 PE=1 SV=1;tr|H3BKM0|H3BKM0_MOUSE AP complex subunit beta OS=Mus musculus OX=10090 G	5	16	6	6	11	12	13	11	5	4	6	4	5	4	6	4	18.7	7.3	7.3	104.83	942	942;937;913;199;44	0	10.908	By MS/MS	By MS/MS	By MS/MS	By MS/MS	0.69956	1.0487	6.7866	19	0	Leave out requantified	0.80159	0.62272	0.66489	0.8595	1.1223	1.0406	0.95906	1.0516
H3BJ30;H3BJW3;Q6NVF9;H3BKW0	H3BJ30;H3BJW3;Q6NVF9;H3BKW0	3;3;3;2	3;3;3;2	3;3;3;2	Cleavage and polyadenylation specificity factor subunit 6	Cpsf6	tr|H3BJ30|H3BJ30_MOUSE Cleavage and polyadenylation-specificity factor subunit 6 OS=Mus musculus OX=10090 GN=Cpsf6 PE=1 SV=1;tr|H3BJW3|H3BJW3_MOUSE Cleavage and polyadenylation-specificity factor subunit 6 OS=Mus musculus OX=10090 GN=Cpsf6 PE=1 SV=1;sp|Q6N	4	3	3	3	1	2	2	2	1	2	2	2	1	2	2	2	7.4	7.4	7.4	59.308	552	552;588;551;182	0	28.98	By MS/MS	By MS/MS	By MS/MS	By MS/MS	0.66222	0.96072	64.315	9	3	Median	NaN	NaN	0.57843	0.80214	NaN	NaN	0.7453	0.98937
H3BJU7;H3BJX8;H3BJ45;H3BJ40;H3BKH9;Q60875;H3BLF9;H3BJ59;H3BL15;H3BLJ1;H3BIX8;H3BJM4;H3BJ48	H3BJU7;H3BJX8;H3BJ45;H3BJ40;H3BKH9;Q60875	14;14;14;14;14;14;4;4;4;3;3;2;2	14;14;14;14;14;14;4;4;4;3;3;2;2	14;14;14;14;14;14;4;4;4;3;3;2;2	Rho guanine nucleotide exchange factor 2	Arhgef2	tr|H3BJU7|H3BJU7_MOUSE Rho guanine nucleotide exchange factor 2 OS=Mus musculus OX=10090 GN=Arhgef2 PE=1 SV=1;tr|H3BJX8|H3BJX8_MOUSE Rho guanine nucleotide exchange factor 2 OS=Mus musculus OX=10090 GN=Arhgef2 PE=1 SV=1;tr|H3BJ45|H3BJ45_MOUSE Rho guanine n	13	14	14	14	6	6	8	11	6	6	8	11	6	6	8	11	17.2	17.2	17.2	108.59	956	956;968;968;970;983;985;203;208;257;126;130;84;89	0	50.518	By MS/MS	By MS/MS	By MS/MS	By MS/MS	0.86309	1.16	0.72469	24	17	Leave out requantified	0.34277	0.50921	0.52336	0.3017	0.42364	0.69829	0.58195	0.35819
H3BJ75;Q9QZB9	H3BJ75;Q9QZB9	1;1	1;1	1;1	Dynactin subunit 5	Dctn5	tr|H3BJ75|H3BJ75_MOUSE Dynactin subunit 5 OS=Mus musculus OX=10090 GN=Dctn5 PE=1 SV=1;sp|Q9QZB9|DCTN5_MOUSE Dynactin subunit 5 OS=Mus musculus OX=10090 GN=Dctn5 PE=1 SV=1	2	1	1	1	0	0	0	1	0	0	0	1	0	0	0	1	18.5	18.5	18.5	6.2671	54	54;182	0.0088951	1.5666				By MS/MS	NaN	NaN	NaN	1	0	Median	NaN	NaN	NaN	NaN	NaN	NaN	NaN	NaN
H3BJA3;O09172;A0A0G2JDI4;F6VNW5	H3BJA3;O09172;A0A0G2JDI4;F6VNW5	2;2;1;1	2;2;1;1	2;2;1;1	Glutamate--cysteine ligase regulatory subunit	Gclm	tr|H3BJA3|H3BJA3_MOUSE Glutamate--cysteine ligase regulatory subunit (Fragment) OS=Mus musculus OX=10090 GN=Gclm PE=1 SV=1;sp|O09172|GSH0_MOUSE Glutamate--cysteine ligase regulatory subunit OS=Mus musculus OX=10090 GN=Gclm PE=1 SV=1;tr|A0A0G2JDI4|A0A0G2JDI	4	2	2	2	1	1	2	1	1	1	2	1	1	1	2	1	14.1	14.1	14.1	21.95	199	199;274;98;153	0	11.574	By MS/MS	By MS/MS	By MS/MS	By MS/MS	0.26891	0.33197	91.598	4	4	Median	NaN	NaN	0.33298	NaN	NaN	NaN	0.37026	NaN
H3BJA6;Q3UXW4;H3BKQ7;H3BJD0;H3BL28;Q7TN74;H3BJD6;Q6R891	H3BJA6;Q3UXW4;H3BKQ7;H3BJD0;H3BL28;Q7TN74;H3BJD6;Q6R891	1;1;1;1;1;1;1;1	1;1;1;1;1;1;1;1	1;1;1;1;1;1;1;1	Neurabin-2	Ppp1r9a;Ppp1r9b	tr|H3BJA6|H3BJA6_MOUSE Protein phosphatase 1, regulatory subunit 9A (Fragment) OS=Mus musculus OX=10090 GN=Ppp1r9a PE=1 SV=1;tr|Q3UXW4|Q3UXW4_MOUSE Protein phosphatase 1, regulatory subunit 9A OS=Mus musculus OX=10090 GN=Ppp1r9a PE=1 SV=1;tr|H3BKQ7|H3BKQ7_	8	1	1	1	1	1	1	1	1	1	1	1	1	1	1	1	4.3	4.3	4.3	25.792	232	232;642;955;977;1042;1095;1292;817	0.0061758	1.6785	By matching	By matching	By matching	By MS/MS	0.573	0.82147	6.0954	4	0	Median	NaN	NaN	NaN	NaN	NaN	NaN	NaN	NaN
H3BLB9;H3BJH6;H3BKF3;Q640Q5	H3BLB9;H3BJH6;H3BKF3;Q640Q5	1;1;1;1	1;1;1;1	1;1;1;1	PAB-dependent poly(A)-specific ribonuclease subunit PAN3	Pan3	tr|H3BLB9|H3BLB9_MOUSE PAN2-PAN3 deadenylation complex subunit Pan3 (Fragment) OS=Mus musculus OX=10090 GN=Pan3 PE=1 SV=1;tr|H3BJH6|H3BJH6_MOUSE PAN2-PAN3 deadenylation complex subunit Pan3 (Fragment) OS=Mus musculus OX=10090 GN=Pan3 PE=1 SV=1;tr|H3BKF3|H3	4	1	1	1	0	0	0	1	0	0	0	1	0	0	0	1	2.6	2.6	2.6	51.779	458	458;688;887;837	0.0044621	1.9404				By MS/MS	NaN	NaN	NaN	1	1	Median	NaN	NaN	NaN	NaN	NaN	NaN	NaN	NaN
H3BJI4;H3BJN8;Q9CPR1	H3BJI4;H3BJN8;Q9CPR1	1;1;1	1;1;1	1;1;1	RWD domain-containing protein 4	Rwdd4a;Rwdd4	tr|H3BJI4|H3BJI4_MOUSE RWD domain containing 4A, isoform CRA_b OS=Mus musculus OX=10090 GN=Rwdd4a PE=1 SV=1;tr|H3BJN8|H3BJN8_MOUSE RWD domain-containing 4A (Fragment) OS=Mus musculus OX=10090 GN=Rwdd4a PE=1 SV=1;sp|Q9CPR1|RWDD4_MOUSE RWD domain-containing	3	1	1	1	1	0	0	0	1	0	0	0	1	0	0	0	22.7	22.7	22.7	5.0345	44	44;132;188	0	2.8538	By MS/MS				NaN	NaN	NaN	1	1	Median	NaN	NaN	NaN	NaN	NaN	NaN	NaN	NaN
H3BKH6;H3BJP2;H3BLJ9;H3BJL6;Q9R0P3;H3BK43;H3BJC6;H3BL99	H3BKH6;H3BJP2;H3BLJ9;H3BJL6;Q9R0P3;H3BK43	8;7;7;7;7;4;2;1	8;7;7;7;7;4;2;1	8;7;7;7;7;4;2;1	S-formylglutathione hydrolase	Esd	tr|H3BKH6|H3BKH6_MOUSE S-formylglutathione hydrolase OS=Mus musculus OX=10090 GN=Esd PE=1 SV=1;tr|H3BJP2|H3BJP2_MOUSE S-formylglutathione hydrolase (Fragment) OS=Mus musculus OX=10090 GN=Esd PE=1 SV=1;tr|H3BLJ9|H3BLJ9_MOUSE S-formylglutathione hydrolase OS	8	8	8	8	3	7	7	2	3	7	7	2	3	7	7	2	34.6	34.6	34.6	32.829	295	295;247;259;265;282;249;135;105	0	17.019	By MS/MS	By MS/MS	By MS/MS	By MS/MS	0.60896	0.95252	11.795	15	4	Leave out requantified	0.67397	0.58768	0.61526	NaN	0.94169	0.98584	0.89886	NaN
H3BKN0;Q1HFZ0	H3BKN0;Q1HFZ0	16;16	16;16	16;16	tRNA (cytosine(34)-C(5))-methyltransferase	Nsun2	tr|H3BKN0|H3BKN0_MOUSE tRNA (cytosine(34)-C(5))-methyltransferase OS=Mus musculus OX=10090 GN=Nsun2 PE=1 SV=1;sp|Q1HFZ0|NSUN2_MOUSE tRNA (cytosine(34)-C(5))-methyltransferase OS=Mus musculus OX=10090 GN=Nsun2 PE=1 SV=2	2	16	16	16	9	11	14	11	9	11	14	11	9	11	14	11	30.2	30.2	30.2	81.373	722	722;757	0	53.69	By MS/MS	By MS/MS	By MS/MS	By MS/MS	0.64495	0.9418	23.856	35	10	Leave out requantified	0.6053	0.55886	0.66127	0.76193	0.86016	0.95409	0.97133	0.90787
H3BL37;O08784;F6R3V4;H3BIX0	H3BL37;O08784;F6R3V4;H3BIX0	2;2;1;1	2;2;1;1	2;2;1;1	Treacle protein	Tcof1	tr|H3BL37|H3BL37_MOUSE Treacle protein OS=Mus musculus OX=10090 GN=Tcof1 PE=1 SV=1;sp|O08784|TCOF_MOUSE Treacle protein OS=Mus musculus OX=10090 GN=Tcof1 PE=1 SV=1;tr|F6R3V4|F6R3V4_MOUSE Treacle protein OS=Mus musculus OX=10090 GN=Tcof1 PE=1 SV=1;tr|H3BIX0	4	2	2	2	1	0	0	1	1	0	0	1	1	0	0	1	2	2	2	138.55	1356	1356;1320;1013;1056	0	6.9994	By MS/MS			By MS/MS	NaN	NaN	NaN	0	0	Median	NaN	NaN	NaN	NaN	NaN	NaN	NaN	NaN
H3BL58	H3BL58	1	1	1		Efcab8	tr|H3BL58|H3BL58_MOUSE EF-hand calcium-binding domain-containing protein 8 OS=Mus musculus OX=10090 GN=Efcab8 PE=4 SV=2	1	1	1	1	1	0	0	0	1	0	0	0	1	0	0	0	1	1	1	149.94	1323	1323	0.0043774	1.8248	By MS/MS				NaN	NaN	NaN	0	0	Median	NaN	NaN	NaN	NaN	NaN	NaN	NaN	NaN
H7BWZ3;Q9JM76;D3Z2F7;D3Z2F8;A0A0G2JFK7	H7BWZ3;Q9JM76;D3Z2F7;D3Z2F8;A0A0G2JFK7	4;4;3;3;2	4;4;3;3;2	4;4;3;3;2	Actin-related protein 2/3 complex subunit 3	Arpc3	tr|H7BWZ3|H7BWZ3_MOUSE Actin-related protein 2/3 complex subunit 3 OS=Mus musculus OX=10090 GN=Arpc3 PE=1 SV=1;sp|Q9JM76|ARPC3_MOUSE Actin-related protein 2/3 complex subunit 3 OS=Mus musculus OX=10090 GN=Arpc3 PE=1 SV=3;tr|D3Z2F7|D3Z2F7_MOUSE Actin-relate	5	4	4	4	2	4	4	2	2	4	4	2	2	4	4	2	22.4	22.4	22.4	19.637	170	170;178;161;163;142	0	10.013	By MS/MS	By MS/MS	By MS/MS	By MS/MS	0.60248	0.89405	6.1795	12	6	Leave out requantified	0.17974	0.27181	0.27986	0.2682	0.25097	0.38322	0.35873	0.33285
H7BX14;Q8BMZ5;A0A0U1RNS7;A0A0U1RNH2;D3YZ84;D3YY06;D3YWG5;D6RH65;A0A0U1RPF7	H7BX14;Q8BMZ5;A0A0U1RNS7;A0A0U1RNH2;D3YZ84;D3YY06;D3YWG5;D6RH65;A0A0U1RPF7	2;2;1;1;1;1;1;1;1	2;2;1;1;1;1;1;1;1	2;2;1;1;1;1;1;1;1	tRNA-splicing endonuclease subunit Sen34	Tsen34	tr|H7BX14|H7BX14_MOUSE tRNA-splicing endonuclease subunit Sen34 OS=Mus musculus OX=10090 GN=Tsen34 PE=1 SV=1;sp|Q8BMZ5|SEN34_MOUSE tRNA-splicing endonuclease subunit Sen34 OS=Mus musculus OX=10090 GN=Tsen34 PE=2 SV=2;tr|A0A0U1RNS7|A0A0U1RNS7_MOUSE tRNA-spl	9	2	2	2	1	1	2	2	1	1	2	2	1	1	2	2	8.7	8.7	8.7	33.828	312	312;316;85;109;143;150;158;167;295	0	5.6074	By MS/MS	By MS/MS	By MS/MS	By MS/MS	0.039873	0.047538	119.1	3	3	Median	NaN	NaN	NaN	NaN	NaN	NaN	NaN	NaN
H7BX95;Q6PDM2;F7AI47;F6QXN3	H7BX95;Q6PDM2	14;14;5;1	14;14;5;1	13;13;5;1	Serine/arginine-rich splicing factor 1	Srsf1	tr|H7BX95|H7BX95_MOUSE Serine/arginine-rich-splicing factor 1 OS=Mus musculus OX=10090 GN=Srsf1 PE=1 SV=1;sp|Q6PDM2|SRSF1_MOUSE Serine/arginine-rich splicing factor 1 OS=Mus musculus OX=10090 GN=Srsf1 PE=1 SV=3	4	14	14	13	10	10	9	9	10	10	9	9	9	9	8	8	53	53	50.2	28.329	253	253;248;106;58	0	47.85	By MS/MS	By MS/MS	By MS/MS	By MS/MS	0.89776	1.322	31.642	17	11	Leave out requantified	0.30009	0.42763	0.67799	0.072045	0.32627	0.60574	0.8624	0.085536
H9KV01;H9KV15;H9KV00;Q9QX47;H9KV02	H9KV01;H9KV15;H9KV00;Q9QX47	5;5;5;5;1	5;5;5;5;1	5;5;5;5;1	Protein SON	Son	tr|H9KV01|H9KV01_MOUSE Protein SON OS=Mus musculus OX=10090 GN=Son PE=1 SV=1;tr|H9KV15|H9KV15_MOUSE Protein SON OS=Mus musculus OX=10090 GN=Son PE=1 SV=1;tr|H9KV00|H9KV00_MOUSE Protein SON OS=Mus musculus OX=10090 GN=Son PE=1 SV=1;sp|Q9QX47|SON_MOUSE Prote	5	5	5	5	1	1	1	5	1	1	1	5	1	1	1	5	3.9	3.9	3.9	252.18	2321	2321;2343;2477;2444;454	0	10.767	By MS/MS	By MS/MS	By MS/MS	By MS/MS	0.052328	0.065128	31.623	4	4	Median	NaN	NaN	NaN	NaN	NaN	NaN	NaN	NaN
H9KV04;Q8R3C0	H9KV04;Q8R3C0	1;1	1;1	1;1	Mini-chromosome maintenance complex-binding protein	Mcmbp	tr|H9KV04|H9KV04_MOUSE Mini-chromosome maintenance complex-binding protein OS=Mus musculus OX=10090 GN=Mcmbp PE=1 SV=1;sp|Q8R3C0|MCMBP_MOUSE Mini-chromosome maintenance complex-binding protein OS=Mus musculus OX=10090 GN=Mcmbp PE=1 SV=1	2	1	1	1	1	0	0	0	1	0	0	0	1	0	0	0	1.5	1.5	1.5	74.575	660	660;642	0	2.9754	By MS/MS				NaN	NaN	NaN	0	0	Median	NaN	NaN	NaN	NaN	NaN	NaN	NaN	NaN
H9KV12;Q8BUI3	H9KV12;Q8BUI3	1;1	1;1	1;1	Leucine-rich repeat and WD repeat-containing protein 1	Lrwd1;LRWD1	tr|H9KV12|H9KV12_MOUSE Leucine-rich repeats and WD repeat domain-containing 1 (Fragment) OS=Mus musculus OX=10090 GN=Lrwd1 PE=1 SV=1;sp|Q8BUI3|LRWD1_MOUSE Leucine-rich repeat and WD repeat-containing protein 1 OS=Mus musculus OX=10090 GN=LRWD1 PE=2 SV=1	2	1	1	1	1	0	1	1	1	0	1	1	1	0	1	1	5.1	5.1	5.1	24.185	216	216;648	0	3.5011	By MS/MS		By MS/MS	By MS/MS	NaN	NaN	NaN	0	0	Median	NaN	NaN	NaN	NaN	NaN	NaN	NaN	NaN
I7HLV2;Q6ZWV3;P86048;A0A1B0GXC3	I7HLV2;Q6ZWV3;P86048;A0A1B0GXC3	8;8;7;4	8;8;7;4	8;8;7;4	60S ribosomal protein L10;60S ribosomal protein L10-like	Rpl10;Rpl10l	tr|I7HLV2|I7HLV2_MOUSE 60S ribosomal protein L10 (Fragment) OS=Mus musculus OX=10090 GN=Rpl10 PE=1 SV=1;sp|Q6ZWV3|RL10_MOUSE 60S ribosomal protein L10 OS=Mus musculus OX=10090 GN=Rpl10 PE=1 SV=3;sp|P86048|RL10L_MOUSE 60S ribosomal protein L10-like OS=Mus m	4	8	8	8	7	7	7	6	7	7	7	6	7	7	7	6	29.9	29.9	29.9	23.072	201	201;214;214;166	0	48.523	By MS/MS	By MS/MS	By MS/MS	By MS/MS	0.14787	0.19742	152.21	26	17	Median	0.15266	0.10827	0.2944	0.5907	0.21267	0.12909	0.37387	0.70823
J3KMQ6;Q9CYI0	J3KMQ6;Q9CYI0	1;1	1;1	1;1	Protein Njmu-R1	5730455P16Rik	tr|J3KMQ6|J3KMQ6_MOUSE RIKEN cDNA 5730455P16 gene OS=Mus musculus OX=10090 GN=5730455P16Rik PE=1 SV=1;sp|Q9CYI0|NJMU_MOUSE Protein Njmu-R1 OS=Mus musculus OX=10090 PE=1 SV=2	2	1	1	1	0	1	1	0	0	1	1	0	0	1	1	0	2.8	2.8	2.8	44.41	393	393;393	0.0025342	2.093		By MS/MS	By MS/MS		NaN	NaN	NaN	0	0	Median	NaN	NaN	NaN	NaN	NaN	NaN	NaN	NaN
Q8BHX6;J3QK52;Q9WV70	Q8BHX6;J3QK52;Q9WV70	2;2;2	2;2;2	2;2;2	Nucleolar complex protein 2 homolog	Noc2l	tr|Q8BHX6|Q8BHX6_MOUSE Nucleolar complex protein 2 homolog OS=Mus musculus OX=10090 GN=Noc2l PE=1 SV=1;tr|J3QK52|J3QK52_MOUSE Nucleolar complex protein 2 homolog OS=Mus musculus OX=10090 GN=Noc2l PE=1 SV=1;sp|Q9WV70|NOC2L_MOUSE Nucleolar complex protein 2	3	2	2	2	2	1	1	1	2	1	1	1	2	1	1	1	3.2	3.2	3.2	68.267	593	593;750;747	0	5.3062	By MS/MS	By MS/MS	By MS/MS	By MS/MS	NaN	NaN	NaN	1	0	Median	NaN	NaN	NaN	NaN	NaN	NaN	NaN	NaN
J3QN06;J3QMM7;K3W4M4;Q9CZ42;J3QPU6	J3QN06;J3QMM7;K3W4M4;Q9CZ42	5;5;5;5;1	5;5;5;5;1	5;5;5;5;1	ATP-dependent (S)-NAD(P)H-hydrate dehydratase	Carkd	tr|J3QN06|J3QN06_MOUSE ATP-dependent (S)-NAD(P)H-hydrate dehydratase OS=Mus musculus OX=10090 GN=Naxd PE=1 SV=1;tr|J3QMM7|J3QMM7_MOUSE ATP-dependent (S)-NAD(P)H-hydrate dehydratase OS=Mus musculus OX=10090 GN=Naxd PE=1 SV=1;tr|K3W4M4|K3W4M4_MOUSE ATP-depen	5	5	5	5	4	4	4	3	4	4	4	3	4	4	4	3	30.9	30.9	30.9	29.133	272	272;327;365;343;79	0	15.914	By MS/MS	By MS/MS	By MS/MS	By MS/MS	0.65398	0.91573	99.093	11	7	Median	0.22555	0.65398	0.47637	0.7164	0.3142	1.1167	0.59981	0.91573
J3QNY1;A2AL12;Q8BG05;B2RXM2;A2AL13;V9GX38	J3QNY1;A2AL12;Q8BG05;B2RXM2	15;14;14;13;4;2	15;14;14;13;4;2	13;12;12;12;3;2	Heterogeneous nuclear ribonucleoprotein A3	Gm9242;Hnrnpa3;Gm6793	tr|J3QNY1|J3QNY1_MOUSE Uncharacterized protein OS=Mus musculus OX=10090 GN=Gm9242 PE=4 SV=1;tr|A2AL12|A2AL12_MOUSE Heterogeneous nuclear ribonucleoprotein A3 OS=Mus musculus OX=10090 GN=Hnrnpa3 PE=1 SV=1;sp|Q8BG05|ROA3_MOUSE Heterogeneous nuclear ribonucle	6	15	15	13	14	11	10	9	14	11	10	9	12	10	10	9	39.8	39.8	35.9	37.14	357	357;318;379;351;194;357	0	120.67	By MS/MS	By MS/MS	By MS/MS	By MS/MS	0.73475	1.0904	1.8207	69	11	Leave out requantified	0.71633	0.60541	0.76038	0.87353	1.0441	1.0606	1.1246	1.0952
J3QP56;P97823;D3YUG4;D3Z111;D3Z269	J3QP56;P97823;D3YUG4;D3Z111	3;3;2;2;1	3;3;2;2;1	3;3;2;2;1	Acyl-protein thioesterase 1	Lypla1	tr|J3QP56|J3QP56_MOUSE Acyl-protein thioesterase 1 OS=Mus musculus OX=10090 GN=Lypla1 PE=1 SV=1;sp|P97823|LYPA1_MOUSE Acyl-protein thioesterase 1 OS=Mus musculus OX=10090 GN=Lypla1 PE=1 SV=1;tr|D3YUG4|D3YUG4_MOUSE Acyl-protein thioesterase 1 (Fragment) OS=	5	3	3	3	3	2	3	2	3	2	3	2	3	2	3	2	14.3	14.3	14.3	23.726	224	224;230;142;196;142	0	13.155	By MS/MS	By MS/MS	By MS/MS	By MS/MS	0.9891	1.4276	21.463	7	1	Leave out requantified	0.91799	0.754	1.0657	NaN	1.274	1.2826	1.5495	NaN
J3QP71;K3W4Q8;P18572	J3QP71;K3W4Q8;P18572	2;2;2	2;2;2	2;2;2	Basigin	Bsg	tr|J3QP71|J3QP71_MOUSE Basigin (Fragment) OS=Mus musculus OX=10090 GN=Bsg PE=1 SV=1;tr|K3W4Q8|K3W4Q8_MOUSE Basigin OS=Mus musculus OX=10090 GN=Bsg PE=1 SV=1;sp|P18572|BASI_MOUSE Basigin OS=Mus musculus OX=10090 GN=Bsg PE=1 SV=2	3	2	2	2	2	1	2	2	2	1	2	2	2	1	2	2	11.7	11.7	11.7	21.602	197	197;218;389	0	6.9885	By MS/MS	By MS/MS	By MS/MS	By MS/MS	0.60723	1.0105	107.07	7	3	Median	0.25775	NaN	0.41204	0.29755	0.36169	NaN	0.52495	0.37343
K3W4R2;Q6URW6;A0A140LI60	K3W4R2;Q6URW6	3;3;1	1;1;1	1;1;1	Myosin-14	Myh14	tr|K3W4R2|K3W4R2_MOUSE Myosin-14 OS=Mus musculus OX=10090 GN=Myh14 PE=1 SV=1;sp|Q6URW6|MYH14_MOUSE Myosin-14 OS=Mus musculus OX=10090 GN=Myh14 PE=1 SV=1	3	3	1	1	3	3	3	3	1	1	1	1	1	1	1	1	1.9	0.6	0.6	228.56	2000	2000;2000;1245	0.0025355	2.0955	By MS/MS	By MS/MS	By MS/MS	By MS/MS	0.57061	0.86863	12.646	4	0	Median	NaN	NaN	NaN	NaN	NaN	NaN	NaN	NaN
Q3UC82;Q80ZH7;K4DI59;P97386;G3UYI8;Q3TJN5;B1AT03	Q3UC82;Q80ZH7;K4DI59;P97386;G3UYI8;Q3TJN5;B1AT03	2;2;2;2;1;1;1	2;2;2;2;1;1;1	2;2;2;2;1;1;1	DNA ligase;DNA ligase 3	Lig3	tr|Q3UC82|Q3UC82_MOUSE DNA ligase OS=Mus musculus OX=10090 GN=Lig3 PE=1 SV=1;tr|Q80ZH7|Q80ZH7_MOUSE DNA ligase OS=Mus musculus OX=10090 GN=Lig3 PE=1 SV=1;tr|K4DI59|K4DI59_MOUSE DNA ligase OS=Mus musculus OX=10090 GN=Lig3 PE=1 SV=1;sp|P97386|DNLI3_MOUSE DNA	7	2	2	2	1	1	1	2	1	1	1	2	1	1	1	2	1.8	1.8	1.8	112.71	1011	1011;1012;1016;1015;174;431;953	0	3.7524	By matching	By matching	By matching	By MS/MS	0.59873	0.69582	5.5361	4	0	Linear	NaN	NaN	NaN	NaN	NaN	NaN	NaN	NaN
K4DI63;O88668	K4DI63;O88668	1;1	1;1	1;1	Protein CREG1	Creg1	tr|K4DI63|K4DI63_MOUSE Cellular repressor of E1A-stimulated genes 1, isoform CRA_a OS=Mus musculus OX=10090 GN=Creg1 PE=1 SV=1;sp|O88668|CREG1_MOUSE Protein CREG1 OS=Mus musculus OX=10090 GN=Creg1 PE=1 SV=1	2	1	1	1	0	1	1	0	0	1	1	0	0	1	1	0	11.7	11.7	11.7	11.021	94	94;220	0.0030166	2.0332		By MS/MS	By MS/MS		0.7663	1.1963	8.4732	2	0	Median	NaN	NaN	NaN	NaN	NaN	NaN	NaN	NaN
O08529	O08529	4	4	4	Calpain-2 catalytic subunit	Capn2	sp|O08529|CAN2_MOUSE Calpain-2 catalytic subunit OS=Mus musculus OX=10090 GN=Capn2 PE=1 SV=4	1	4	4	4	1	1	0	3	1	1	0	3	1	1	0	3	5.7	5.7	5.7	79.871	700	700	0	8.369	By MS/MS	By MS/MS		By MS/MS	NaN	NaN	NaN	1	1	Median	NaN	NaN	NaN	NaN	NaN	NaN	NaN	NaN
O08547;E9Q6R3;A0A0G2JF08;D6RES2	O08547;E9Q6R3	9;8;3;1	9;8;3;1	9;8;3;1	Vesicle-trafficking protein SEC22b	Sec22b	sp|O08547|SC22B_MOUSE Vesicle-trafficking protein SEC22b OS=Mus musculus OX=10090 GN=Sec22b PE=1 SV=3;tr|E9Q6R3|E9Q6R3_MOUSE Vesicle-trafficking protein SEC22b OS=Mus musculus OX=10090 GN=Sec22b PE=1 SV=1	4	9	9	9	7	3	5	6	7	3	5	6	7	3	5	6	47.4	47.4	47.4	24.74	215	215;166;62;42	0	47.544	By MS/MS	By MS/MS	By MS/MS	By MS/MS	0.75988	1.0462	7.4027	15	8	Leave out requantified	0.81607	0.54694	0.74361	0.3292	1.1523	0.77659	1.0738	0.41771
O08553	O08553	16	14	13	Dihydropyrimidinase-related protein 2	Dpysl2	sp|O08553|DPYL2_MOUSE Dihydropyrimidinase-related protein 2 OS=Mus musculus OX=10090 GN=Dpysl2 PE=1 SV=2	1	16	14	13	12	12	13	13	11	10	12	12	10	9	11	11	40.7	36.7	34.4	62.277	572	572	0	87.275	By MS/MS	By MS/MS	By MS/MS	By MS/MS	0.70893	1.0333	10.622	40	24	Leave out requantified	0.69729	0.6104	0.6768	0.87769	0.99027	1.0411	0.98203	1.0638
O08579;Q3THM8;B7FAU5;I7HJS1	O08579;Q3THM8;B7FAU5;I7HJS1	3;2;2;2	3;2;2;2	3;2;2;2	Emerin	Emd	sp|O08579|EMD_MOUSE Emerin OS=Mus musculus OX=10090 GN=Emd PE=1 SV=1;tr|Q3THM8|Q3THM8_MOUSE Emerin OS=Mus musculus OX=10090 GN=Emd PE=1 SV=1;tr|B7FAU5|B7FAU5_MOUSE Emerin OS=Mus musculus OX=10090 GN=Emd PE=1 SV=1;tr|I7HJS1|I7HJS1_MOUSE Emerin OS=Mus muscul	4	3	3	3	1	2	1	2	1	2	1	2	1	2	1	2	18.9	18.9	18.9	29.435	259	259;158;170;223	0	8.1599	By MS/MS	By MS/MS	By MS/MS	By MS/MS	0.94246	1.124	11.323	5	1	Median	NaN	0.79304	NaN	NaN	NaN	1.1237	NaN	NaN
O08582;A0A2R8VKJ2;A0A2R8W6Z1;A0A2R8VI47	O08582	4;1;1;1	4;1;1;1	4;1;1;1	GTP-binding protein 1	Gtpbp1	sp|O08582|GTPB1_MOUSE GTP-binding protein 1 OS=Mus musculus OX=10090 GN=Gtpbp1 PE=1 SV=2	4	4	4	4	1	3	3	2	1	3	3	2	1	3	3	2	7.9	7.9	7.9	72.3	668	668;137;145;174	0	11.081	By MS/MS	By MS/MS	By MS/MS	By MS/MS	0.55868	0.92852	87.899	7	3	Median	NaN	0.32241	0.50411	0.29311	NaN	0.45682	0.63766	0.36305
O08583;G3X9I4;Q9JJW6	O08583	5;2;2	5;2;2	5;2;2	THO complex subunit 4	Alyref	sp|O08583|THOC4_MOUSE THO complex subunit 4 OS=Mus musculus OX=10090 GN=Alyref PE=1 SV=3	3	5	5	5	4	4	4	5	4	4	4	5	4	4	4	5	27.8	27.8	27.8	26.94	255	255;218;218	0	46.719	By MS/MS	By MS/MS	By MS/MS	By MS/MS	0.067887	0.086776	140.69	19	14	Median	0.092217	0.043341	0.11298	0.089006	0.11349	0.051673	0.12562	0.11377
O08599;A0A140LHJ4	O08599	5;1	5;1	5;1	Syntaxin-binding protein 1	Stxbp1	sp|O08599|STXB1_MOUSE Syntaxin-binding protein 1 OS=Mus musculus OX=10090 GN=Stxbp1 PE=1 SV=2	2	5	5	5	3	2	2	2	3	2	2	2	3	2	2	2	14.8	14.8	14.8	67.568	594	594;100	0	12.75	By MS/MS	By MS/MS	By MS/MS	By MS/MS	0.071461	0.096748	120.86	4	4	Median	0.20499	NaN	NaN	NaN	0.28595	NaN	NaN	NaN
O08601	O08601	2	2	2	Microsomal triglyceride transfer protein large subunit	Mttp	sp|O08601|MTP_MOUSE Microsomal triglyceride transfer protein large subunit OS=Mus musculus OX=10090 GN=Mttp PE=1 SV=2	1	2	2	2	1	2	1	2	1	2	1	2	1	2	1	2	3.1	3.1	3.1	99.098	894	894	0	4.0954	By MS/MS	By MS/MS	By matching	By MS/MS	0.80504	1.0614	19.014	4	0	Median	NaN	NaN	NaN	NaN	NaN	NaN	NaN	NaN
Q3UI33;O08663;Q3TMN1;M0QWM9;M0QW48;M0QW69	Q3UI33;O08663;Q3TMN1;M0QWM9;M0QW48	8;8;7;5;4;2	8;8;7;5;4;2	8;8;7;5;4;2	Methionine aminopeptidase 2;Methionine aminopeptidase	Metap2	tr|Q3UI33|Q3UI33_MOUSE Methionine aminopeptidase 2 OS=Mus musculus OX=10090 GN=Metap2 PE=1 SV=1;sp|O08663|MAP2_MOUSE Methionine aminopeptidase 2 OS=Mus musculus OX=10090 GN=Metap2 PE=1 SV=1;tr|Q3TMN1|Q3TMN1_MOUSE Methionine aminopeptidase 2 OS=Mus musculus	6	8	8	8	6	5	7	6	6	5	7	6	6	5	7	6	23.8	23.8	23.8	54.117	488	488;478;455;242;233;186	0	30.76	By MS/MS	By MS/MS	By MS/MS	By MS/MS	1.2765	1.6289	27.909	18	7	Leave out requantified	0.97377	1.1514	1.1327	1.4268	1.3628	1.9763	1.6314	1.7207
O08749	O08749	10	10	10	Dihydrolipoyl dehydrogenase, mitochondrial	Dld	sp|O08749|DLDH_MOUSE Dihydrolipoyl dehydrogenase, mitochondrial OS=Mus musculus OX=10090 GN=Dld PE=1 SV=2	1	10	10	10	8	8	8	7	8	8	8	7	8	8	8	7	23.6	23.6	23.6	54.272	509	509	0	50.22	By MS/MS	By MS/MS	By MS/MS	By MS/MS	0.65164	0.97982	72.275	30	12	Leave out requantified	0.69361	0.57003	0.64466	0.82509	0.98058	0.96085	0.94022	1.0158
Q6NXL3;O08791;Q5SWK8;Q5SWK4;O08792;Q07802;Q3UUB6	Q6NXL3;O08791;Q5SWK8;Q5SWK4;O08792;Q07802	3;3;2;2;2;2;1	3;3;2;2;2;2;1	3;3;2;2;2;2;1	Transcription factor COE3;Transcription factor COE2;Transcription factor COE1	Ebf3;Ebf1;Ebf2	tr|Q6NXL3|Q6NXL3_MOUSE Ebf3 protein OS=Mus musculus OX=10090 GN=Ebf3 PE=1 SV=1;sp|O08791|COE3_MOUSE Transcription factor COE3 OS=Mus musculus OX=10090 GN=Ebf3 PE=1 SV=1;tr|Q5SWK8|Q5SWK8_MOUSE Transcription factor COE1 OS=Mus musculus OX=10090 GN=Ebf1 PE=1	7	3	3	3	2	2	1	1	2	2	1	1	2	2	1	1	5.6	5.6	5.6	63.944	587	587;596;584;592;575;591;344	0	7.8949	By MS/MS	By MS/MS	By MS/MS	By MS/MS	1.9433	2.5044	130.5	2	2	Median	NaN	NaN	NaN	NaN	NaN	NaN	NaN	NaN
O08795;A0A1L1ST83	O08795	9;2	9;2	9;2	Glucosidase 2 subunit beta	Prkcsh	sp|O08795|GLU2B_MOUSE Glucosidase 2 subunit beta OS=Mus musculus OX=10090 GN=Prkcsh PE=1 SV=1	2	9	9	9	2	6	5	3	2	6	5	3	2	6	5	3	23.8	23.8	23.8	58.792	521	521;119	0	41.497	By MS/MS	By MS/MS	By MS/MS	By MS/MS	0.64007	1.019	15.262	15	3	Leave out requantified	0.5054	0.54649	0.74967	0.6697	0.70405	0.94569	1.0979	0.84709
O08807;B1AZS9	O08807;B1AZS9	7;6	6;5	6;5	Peroxiredoxin-4	Prdx4	sp|O08807|PRDX4_MOUSE Peroxiredoxin-4 OS=Mus musculus OX=10090 GN=Prdx4 PE=1 SV=1;tr|B1AZS9|B1AZS9_MOUSE Peroxiredoxin-4 (Fragment) OS=Mus musculus OX=10090 GN=Prdx4 PE=1 SV=1	2	7	6	6	5	5	7	6	4	4	6	5	4	4	6	5	31.8	28.8	28.8	31.052	274	274;229	0	24.124	By MS/MS	By MS/MS	By MS/MS	By MS/MS	1.1112	1.6061	99.796	18	7	Leave out requantified	0.16193	0.98087	1.0744	1.1494	0.22558	1.6473	1.5659	1.4202
O08848	O08848	2	2	2	60 kDa SS-A/Ro ribonucleoprotein	Trove2	sp|O08848|RO60_MOUSE 60 kDa SS-A/Ro ribonucleoprotein OS=Mus musculus OX=10090 GN=Trove2 PE=1 SV=1	1	2	2	2	0	1	1	1	0	1	1	1	0	1	1	1	5.4	5.4	5.4	60.123	538	538	0	3.9509		By MS/MS	By MS/MS	By MS/MS	NaN	NaN	NaN	1	1	Median	NaN	NaN	NaN	NaN	NaN	NaN	NaN	NaN
O08915;D3YW40	O08915	3;1	3;1	3;1	AH receptor-interacting protein	Aip	sp|O08915|AIP_MOUSE AH receptor-interacting protein OS=Mus musculus OX=10090 GN=Aip PE=1 SV=1	2	3	3	3	1	1	2	2	1	1	2	2	1	1	2	2	13.6	13.6	13.6	37.605	330	330;172	0	5.286	By MS/MS	By MS/MS	By MS/MS	By MS/MS	0.77671	1.0242	9.9057	3	1	Plateau	NaN	NaN	0.72183	NaN	NaN	NaN	0.91166	NaN
O08997	O08997	3	3	3	Copper transport protein ATOX1	Atox1	sp|O08997|ATOX1_MOUSE Copper transport protein ATOX1 OS=Mus musculus OX=10090 GN=Atox1 PE=1 SV=1	1	3	3	3	3	3	3	2	3	3	3	2	3	3	3	2	57.4	57.4	57.4	7.3384	68	68	0	20.906	By MS/MS	By MS/MS	By MS/MS	By MS/MS	0.73177	1.0882	1.6289	15	1	Leave out requantified	0.74837	0.65594	0.76888	0.88004	1.05	1.0908	1.1185	1.09
O09061	O09061	7	7	7	Proteasome subunit beta type-1	Psmb1	sp|O09061|PSB1_MOUSE Proteasome subunit beta type-1 OS=Mus musculus OX=10090 GN=Psmb1 PE=1 SV=1	1	7	7	7	5	5	6	7	5	5	6	7	5	5	6	7	46.2	46.2	46.2	26.372	240	240	0	66.059	By MS/MS	By MS/MS	By MS/MS	By MS/MS	0.64504	0.90698	6.1277	22	10	Leave out requantified	0.47783	0.57025	0.35733	0.6537	0.67535	0.95943	0.45058	0.80371
O09174	O09174	1	1	1	Alpha-methylacyl-CoA racemase	Amacr	sp|O09174|AMACR_MOUSE Alpha-methylacyl-CoA racemase OS=Mus musculus OX=10090 GN=Amacr PE=1 SV=4	1	1	1	1	0	1	1	0	0	1	1	0	0	1	1	0	2.4	2.4	2.4	41.704	381	381	0.0034757	1.9495		By MS/MS	By MS/MS		0.14335	0.16505	18.583	2	2	Median	NaN	NaN	NaN	NaN	NaN	NaN	NaN	NaN
O35114	O35114	5	5	5	Lysosome membrane protein 2	Scarb2	sp|O35114|SCRB2_MOUSE Lysosome membrane protein 2 OS=Mus musculus OX=10090 GN=Scarb2 PE=1 SV=3	1	5	5	5	4	5	4	4	4	5	4	4	4	5	4	4	13.8	13.8	13.8	54.043	478	478	0	25.697	By MS/MS	By MS/MS	By MS/MS	By MS/MS	0.38239	0.5959	46.026	18	9	Leave out requantified	0.38929	0.36424	0.63765	0.30226	0.5423	0.60043	0.92238	0.38635
O35127	O35127	1	1	1	Protein C10	Grcc10	sp|O35127|C10_MOUSE Protein C10 OS=Mus musculus OX=10090 GN=Grcc10 PE=1 SV=1	1	1	1	1	1	0	1	1	1	0	1	1	1	0	1	1	14.3	14.3	14.3	13.194	126	126	0	3.1267	By MS/MS		By MS/MS	By MS/MS	NaN	NaN	NaN	1	1	Median	NaN	NaN	NaN	NaN	NaN	NaN	NaN	NaN
O35129;F6QPR1;F6Q8V7	O35129;F6QPR1	12;7;4	12;7;4	12;7;4	Prohibitin-2	Phb2	sp|O35129|PHB2_MOUSE Prohibitin-2 OS=Mus musculus OX=10090 GN=Phb2 PE=1 SV=1;tr|F6QPR1|F6QPR1_MOUSE Prohibitin-2 (Fragment) OS=Mus musculus OX=10090 GN=Phb2 PE=1 SV=1	3	12	12	12	10	8	7	8	10	8	7	8	10	8	7	8	44.8	44.8	44.8	33.296	299	299;157;104	0	44.913	By MS/MS	By MS/MS	By MS/MS	By MS/MS	0.62915	0.86508	5.7758	24	10	Leave out requantified	0.61631	0.50222	0.59201	0.74987	0.87087	0.86918	0.86196	0.92648
O35130	O35130	1	1	1	Ribosomal RNA small subunit methyltransferase NEP1	Emg1	sp|O35130|NEP1_MOUSE Ribosomal RNA small subunit methyltransferase NEP1 OS=Mus musculus OX=10090 GN=Emg1 PE=1 SV=1	1	1	1	1	1	1	1	1	1	1	1	1	1	1	1	1	8.2	8.2	8.2	26.974	244	244	0.0053217	1.7818	By MS/MS	By matching	By MS/MS	By MS/MS	0.77477	0.86382	7.8558	4	0	Linear	NaN	NaN	NaN	NaN	NaN	NaN	NaN	NaN
O35215;G3UZN1;G3UYJ7	O35215;G3UZN1;G3UYJ7	6;5;4	6;5;4	6;5;4	D-dopachrome decarboxylase	Ddt;Gm20441	sp|O35215|DOPD_MOUSE D-dopachrome decarboxylase OS=Mus musculus OX=10090 GN=Ddt PE=1 SV=3;tr|G3UZN1|G3UZN1_MOUSE D-dopachrome decarboxylase OS=Mus musculus OX=10090 GN=Ddt PE=1 SV=1;tr|G3UYJ7|G3UYJ7_MOUSE Uncharacterized protein (Fragment) OS=Mus musculus	3	6	6	6	3	5	3	3	3	5	3	3	3	5	3	3	63.6	63.6	63.6	13.077	118	118;73;252	0	25.912	By MS/MS	By MS/MS	By MS/MS	By MS/MS	0.57956	0.88489	15.789	13	8	Leave out requantified	0.7962	0.5088	0.57956	0.60315	1.1137	0.72453	0.8231	0.72327
O35226;F7AI87	O35226	7;2	7;2	7;2	26S proteasome non-ATPase regulatory subunit 4	Psmd4	sp|O35226|PSMD4_MOUSE 26S proteasome non-ATPase regulatory subunit 4 OS=Mus musculus OX=10090 GN=Psmd4 PE=1 SV=1	2	7	7	7	3	4	3	5	3	4	3	5	3	4	3	5	18.4	18.4	18.4	40.703	376	376;194	0	28.59	By MS/MS	By MS/MS	By MS/MS	By MS/MS	0.75995	1.0069	9.6065	15	6	Leave out requantified	0.67872	0.56705	0.59501	0.73987	0.95078	0.94816	0.86384	0.91105
O35286;Q497W9;A0A0G2JG10;A0A0G2JGQ5	O35286;Q497W9;A0A0G2JG10	24;21;15;5	24;21;15;5	24;21;15;5	Pre-mRNA-splicing factor ATP-dependent RNA helicase DHX15	Dhx15	sp|O35286|DHX15_MOUSE Pre-mRNA-splicing factor ATP-dependent RNA helicase DHX15 OS=Mus musculus OX=10090 GN=Dhx15 PE=1 SV=2;tr|Q497W9|Q497W9_MOUSE DEAH (Asp-Glu-Ala-His) box polypeptide 15 OS=Mus musculus OX=10090 GN=Dhx15 PE=1 SV=1;tr|A0A0G2JG10|A0A0G2JG1	4	24	24	24	15	14	19	17	15	14	19	17	15	14	19	17	31.6	31.6	31.6	91.006	795	795;703;608;186	0	71.139	By MS/MS	By MS/MS	By MS/MS	By MS/MS	0.82082	1.1913	9.3658	60	32	Leave out requantified	0.82963	0.71752	0.7899	0.92946	1.162	1.2072	1.1458	1.1533
Q9D8S5;O35326	Q9D8S5;O35326	3;3	2;2	2;2	Serine/arginine-rich splicing factor 5	Srsf5	tr|Q9D8S5|Q9D8S5_MOUSE MCG7614, isoform CRA_c OS=Mus musculus OX=10090 GN=Srsf5 PE=1 SV=1;sp|O35326|SRSF5_MOUSE Serine/arginine-rich splicing factor 5 OS=Mus musculus OX=10090 GN=Srsf5 PE=1 SV=2	2	3	2	2	2	1	2	0	1	1	2	0	1	1	2	0	11.1	7.8	7.8	30.978	270	270;269	0	2.9374	By MS/MS	By MS/MS	By MS/MS		0.62815	0.91336	174.18	3	2	Median	NaN	NaN	0.1522	NaN	NaN	NaN	0.20983	NaN
O35344	O35344	6	6	4	Importin subunit alpha-4	Kpna3	sp|O35344|IMA4_MOUSE Importin subunit alpha-4 OS=Mus musculus OX=10090 GN=Kpna3 PE=1 SV=1	1	6	6	4	6	1	1	4	6	1	1	4	4	1	1	3	13.4	13.4	8.8	57.772	521	521	0	14.373	By MS/MS	By MS/MS	By matching	By MS/MS	0.67847	0.93146	11.852	11	5	Leave out requantified	0.53132	NaN	NaN	0.59212	0.74161	NaN	NaN	0.73909
Q4FJZ2;O35345	Q4FJZ2;O35345	4;4	4;4	2;2	Importin subunit alpha;Importin subunit alpha-7	Kpna6	tr|Q4FJZ2|Q4FJZ2_MOUSE Importin subunit alpha OS=Mus musculus OX=10090 GN=Kpna6 PE=1 SV=1;sp|O35345|IMA7_MOUSE Importin subunit alpha-7 OS=Mus musculus OX=10090 GN=Kpna6 PE=1 SV=2	2	4	4	2	1	3	1	2	1	3	1	2	0	2	0	1	10.9	10.9	5.6	59.602	533	533;536	0	13.061	By MS/MS	By MS/MS	By MS/MS	By MS/MS	NaN	NaN	NaN	1	0	Median	NaN	NaN	NaN	NaN	NaN	NaN	NaN	NaN
O35381;D3YYE1;D3Z7M9;F6UFG6;Q64G17	O35381;D3YYE1;D3Z7M9;F6UFG6	6;5;5;4;2	6;5;5;4;2	6;5;5;4;2	Acidic leucine-rich nuclear phosphoprotein 32 family member A	Anp32a	sp|O35381|AN32A_MOUSE Acidic leucine-rich nuclear phosphoprotein 32 family member A OS=Mus musculus OX=10090 GN=Anp32a PE=1 SV=1;tr|D3YYE1|D3YYE1_MOUSE Acidic leucine-rich nuclear phosphoprotein 32 family member A (Fragment) OS=Mus musculus OX=10090 GN=Anp	5	6	6	6	6	5	5	5	6	5	5	5	6	5	5	5	29.1	29.1	29.1	28.537	247	247;198;233;138;123	0	17.779	By MS/MS	By MS/MS	By MS/MS	By MS/MS	0.7	1.0231	5.7734	23	8	Leave out requantified	0.70111	0.59982	0.71816	0.8321	0.98221	1.0042	1.0423	1.0462
O35423	O35423	1	1	1	Serine--pyruvate aminotransferase, mitochondrial	Agxt	sp|O35423|SPYA_MOUSE Serine--pyruvate aminotransferase, mitochondrial OS=Mus musculus OX=10090 GN=Agxt PE=1 SV=3	1	1	1	1	0	0	1	0	0	0	1	0	0	0	1	0	1.7	1.7	1.7	45.912	414	414	1	-2			By MS/MS		NaN	NaN	NaN	0	0	Median	NaN	NaN	NaN	NaN	NaN	NaN	NaN	NaN
O35465;F6WP10	O35465;F6WP10	2;1	2;1	2;1	Peptidyl-prolyl cis-trans isomerase FKBP8	Fkbp8	sp|O35465|FKBP8_MOUSE Peptidyl-prolyl cis-trans isomerase FKBP8 OS=Mus musculus OX=10090 GN=Fkbp8 PE=1 SV=2;tr|F6WP10|F6WP10_MOUSE Peptidyl-prolyl cis-trans isomerase FKBP8 (Fragment) OS=Mus musculus OX=10090 GN=Fkbp8 PE=1 SV=1	2	2	2	2	0	1	1	1	0	1	1	1	0	1	1	1	8	8	8	43.528	402	402;36	0	8.4896		By MS/MS	By MS/MS	By MS/MS	NaN	NaN	NaN	0	0	Median	NaN	NaN	NaN	NaN	NaN	NaN	NaN	NaN
O35593	O35593	3	3	3	26S proteasome non-ATPase regulatory subunit 14	Psmd14	sp|O35593|PSDE_MOUSE 26S proteasome non-ATPase regulatory subunit 14 OS=Mus musculus OX=10090 GN=Psmd14 PE=1 SV=2	1	3	3	3	3	1	3	3	3	1	3	3	3	1	3	3	12.6	12.6	12.6	34.577	310	310	0	10.335	By MS/MS	By matching	By MS/MS	By MS/MS	0.50289	0.66668	175.09	10	4	Median	0.3203	NaN	0.74443	0.14509	0.39652	NaN	1.0826	0.18546
Q5SVG5;Q5SVG4;O35643	Q5SVG5;Q5SVG4;O35643	16;16;16	16;16;16	6;6;6	AP-1 complex subunit beta-1	Ap1b1	tr|Q5SVG5|Q5SVG5_MOUSE AP complex subunit beta OS=Mus musculus OX=10090 GN=Ap1b1 PE=1 SV=1;tr|Q5SVG4|Q5SVG4_MOUSE AP complex subunit beta OS=Mus musculus OX=10090 GN=Ap1b1 PE=1 SV=1;sp|O35643|AP1B1_MOUSE AP-1 complex subunit beta-1 OS=Mus musculus OX=10090	3	16	16	6	9	13	11	10	9	13	11	10	3	5	4	3	19	19	7.3	101.19	916	916;923;943	0	43.658	By MS/MS	By MS/MS	By MS/MS	By MS/MS	0.72079	1.007	11.328	50	12	Leave out requantified	0.77591	0.58101	0.67772	0.84108	1.0846	1.0062	0.97886	1.0366
O35654;A8Y5G7	O35654	3;1	3;1	3;1	DNA polymerase delta subunit 2	Pold2	sp|O35654|DPOD2_MOUSE DNA polymerase delta subunit 2 OS=Mus musculus OX=10090 GN=Pold2 PE=1 SV=2	2	3	3	3	2	2	2	2	2	2	2	2	2	2	2	2	9.2	9.2	9.2	51.354	469	469;241	0	10.279	By MS/MS	By MS/MS	By MS/MS	By MS/MS	0.73229	1.1008	150.78	6	2	Median	NaN	NaN	0.15201	0.67899	NaN	NaN	0.19186	0.84739
O35685	O35685	16	16	16	Nuclear migration protein nudC	Nudc	sp|O35685|NUDC_MOUSE Nuclear migration protein nudC OS=Mus musculus OX=10090 GN=Nudc PE=1 SV=1	1	16	16	16	13	10	11	12	13	10	11	12	13	10	11	12	49.4	49.4	49.4	38.358	332	332	0	123.17	By MS/MS	By MS/MS	By MS/MS	By MS/MS	0.58263	0.85074	4.164	52	10	Leave out requantified	0.6141	0.49678	0.57687	0.6923	0.86473	0.83662	0.83764	0.8521
Q3TUQ5;O35691;A0A1W2P6S1	Q3TUQ5;O35691	7;7;1	7;7;1	7;7;1	Pinin	Pnn	tr|Q3TUQ5|Q3TUQ5_MOUSE Pinin OS=Mus musculus OX=10090 GN=Pnn PE=1 SV=1;sp|O35691|PININ_MOUSE Pinin OS=Mus musculus OX=10090 GN=Pnn PE=1 SV=4	3	7	7	7	3	2	3	2	3	2	3	2	3	2	3	2	11	11	11	82.504	726	726;725;59	0	13.76	By MS/MS	By MS/MS	By MS/MS	By MS/MS	0.81203	1.1705	18.714	8	4	Leave out requantified	0.65989	0.80306	0.79987	0.57104	0.91756	1.3444	1.1465	0.6042
O35709	O35709	1	1	1	Ectoderm-neural cortex protein 1	Enc1	sp|O35709|ENC1_MOUSE Ectoderm-neural cortex protein 1 OS=Mus musculus OX=10090 GN=Enc1 PE=2 SV=2	1	1	1	1	1	0	0	0	1	0	0	0	1	0	0	0	2	2	2	66.112	589	589	0.0010616	2.4903	By MS/MS				NaN	NaN	NaN	0	0	Median	NaN	NaN	NaN	NaN	NaN	NaN	NaN	NaN
Q8C2Q7;O35737	Q8C2Q7;O35737	14;14	14;14	7;7	Heterogeneous nuclear ribonucleoprotein H;Heterogeneous nuclear ribonucleoprotein H, N-terminally processed	Hnrnph1	tr|Q8C2Q7|Q8C2Q7_MOUSE Heterogeneous nuclear ribonucleoprotein H OS=Mus musculus OX=10090 GN=Hnrnph1 PE=1 SV=1;sp|O35737|HNRH1_MOUSE Heterogeneous nuclear ribonucleoprotein H OS=Mus musculus OX=10090 GN=Hnrnph1 PE=1 SV=3	2	14	14	7	7	13	10	8	7	13	10	8	3	7	5	3	35.8	35.8	18.2	51.217	472	472;449	0	104.87	By MS/MS	By MS/MS	By MS/MS	By MS/MS	0.76391	1.1185	12.043	25	11	Leave out requantified	0.77225	0.68115	0.76487	0.95353	1.0904	1.1506	1.1117	1.1764
O35841	O35841	7	7	7	Apoptosis inhibitor 5	Api5	sp|O35841|API5_MOUSE Apoptosis inhibitor 5 OS=Mus musculus OX=10090 GN=Api5 PE=1 SV=2	1	7	7	7	6	6	7	4	6	6	7	4	6	6	7	4	15.5	15.5	15.5	56.784	504	504	0	21.375	By MS/MS	By MS/MS	By MS/MS	By MS/MS	0.82878	1.0635	66.461	22	7	Leave out requantified	0.80041	0.61491	0.82057	0.88285	1.1176	1.0359	1.1859	1.069
O35857	O35857	7	7	7	Mitochondrial import inner membrane translocase subunit TIM44	Timm44	sp|O35857|TIM44_MOUSE Mitochondrial import inner membrane translocase subunit TIM44 OS=Mus musculus OX=10090 GN=Timm44 PE=1 SV=2	1	7	7	7	4	4	5	5	4	4	5	5	4	4	5	5	17	17	17	51.091	452	452	0	18.445	By MS/MS	By MS/MS	By MS/MS	By MS/MS	0.63707	0.94371	0.24812	13	5	Leave out requantified	0.65486	0.56484	0.61977	0.80261	0.921	0.95784	0.89375	0.98237
O35864;A0A087WQA8;A0A087WQ60	O35864	5;2;1	5;2;1	5;2;1	COP9 signalosome complex subunit 5	Cops5	sp|O35864|CSN5_MOUSE COP9 signalosome complex subunit 5 OS=Mus musculus OX=10090 GN=Cops5 PE=1 SV=3	3	5	5	5	2	4	5	2	2	4	5	2	2	4	5	2	14.4	14.4	14.4	37.548	334	334;210;147	0	17.226	By MS/MS	By MS/MS	By MS/MS	By MS/MS	0.55605	0.86175	5.2709	10	3	Leave out requantified	NaN	0.52407	0.57731	NaN	NaN	0.90241	0.83346	NaN
Q5SSP3;O35874	Q5SSP3;O35874	2;2	2;2	2;2	Amino acid transporter;Neutral amino acid transporter A	Slc1a4	tr|Q5SSP3|Q5SSP3_MOUSE Neutral amino acid transporter A OS=Mus musculus OX=10090 GN=Slc1a4 PE=1 SV=1;sp|O35874|SATT_MOUSE Neutral amino acid transporter A OS=Mus musculus OX=10090 GN=Slc1a4 PE=1 SV=1	2	2	2	2	1	0	2	2	1	0	2	2	1	0	2	2	8.4	8.4	8.4	47.666	452	452;532	0	7.8415	By MS/MS		By MS/MS	By MS/MS	0.53735	0.76915	171.51	5	3	Median	NaN	NaN	0.15278	0.13696	NaN	NaN	0.19275	0.17261
O35887;Q6XLQ8;G3V004;G3UXA8;G3UWV3;G3UWR0;G3UXA3;G3UY49	O35887;Q6XLQ8;G3V004;G3UXA8;G3UWV3;G3UWR0	8;7;6;6;4;4;2;2	8;7;6;6;4;4;2;2	8;7;6;6;4;4;2;2	Calumenin	Calu	sp|O35887|CALU_MOUSE Calumenin OS=Mus musculus OX=10090 GN=Calu PE=1 SV=1;tr|Q6XLQ8|Q6XLQ8_MOUSE Calumenin OS=Mus musculus OX=10090 GN=Calu PE=1 SV=1;tr|G3V004|G3V004_MOUSE Calumenin OS=Mus musculus OX=10090 GN=Calu PE=1 SV=1;tr|G3UXA8|G3UXA8_MOUSE Calumen	8	8	8	8	2	6	7	3	2	6	7	3	2	6	7	3	27.3	27.3	27.3	37.063	315	315;315;163;168;154;227;74;141	0	42.865	By MS/MS	By MS/MS	By MS/MS	By MS/MS	0.80288	1.1442	12.146	18	4	Leave out requantified	0.74487	0.68213	0.81166	0.95395	1.0535	1.1475	1.1701	1.1725
O35900;O35901	O35900;O35901	2;1	2;1	2;1	U6 snRNA-associated Sm-like protein LSm2	Lsm2	sp|O35900|LSM2_MOUSE U6 snRNA-associated Sm-like protein LSm2 OS=Mus musculus OX=10090 GN=Lsm2 PE=1 SV=1;tr|O35901|O35901_MOUSE U6 snRNA-associated Sm-like protein LSm2 OS=Mus musculus OX=10090 GN=Lsm2 PE=1 SV=1	2	2	2	2	1	2	1	2	1	2	1	2	1	2	1	2	20	20	20	10.834	95	95;131	0	5.0331	By MS/MS	By MS/MS	By MS/MS	By MS/MS	0.5249	0.8209	34.163	8	1	Leave out requantified	NaN	0.48029	NaN	0.79624	NaN	0.82025	NaN	0.96788
O35972;A0A1B0GQZ1;A0A1B0GSZ9	O35972;A0A1B0GQZ1;A0A1B0GSZ9	2;1;1	2;1;1	2;1;1	39S ribosomal protein L23, mitochondrial	Mrpl23	sp|O35972|RM23_MOUSE 39S ribosomal protein L23, mitochondrial OS=Mus musculus OX=10090 GN=Mrpl23 PE=1 SV=1;tr|A0A1B0GQZ1|A0A1B0GQZ1_MOUSE 39S ribosomal protein L23, mitochondrial OS=Mus musculus OX=10090 GN=Mrpl23 PE=1 SV=1;tr|A0A1B0GSZ9|A0A1B0GSZ9_MOUSE 3	3	2	2	2	2	2	1	1	2	2	1	1	2	2	1	1	20.5	20.5	20.5	17.121	146	146;101;172	0	8.1439	By MS/MS	By MS/MS	By MS/MS	By MS/MS	0.3206	0.39577	64.096	4	4	Median	NaN	NaN	NaN	NaN	NaN	NaN	NaN	NaN
O54692	O54692	1	1	1	Centromere/kinetochore protein zw10 homolog	Zw10	sp|O54692|ZW10_MOUSE Centromere/kinetochore protein zw10 homolog OS=Mus musculus OX=10090 GN=Zw10 PE=1 SV=3	1	1	1	1	1	1	1	1	1	1	1	1	1	1	1	1	2.1	2.1	2.1	88.062	779	779	0	10.236	By MS/MS	By matching	By MS/MS	By MS/MS	0.8506	1.0685	6.111	4	0	Linear	NaN	NaN	NaN	NaN	NaN	NaN	NaN	NaN
O54734	O54734	6	6	6	Dolichyl-diphosphooligosaccharide--protein glycosyltransferase 48 kDa subunit	Ddost	sp|O54734|OST48_MOUSE Dolichyl-diphosphooligosaccharide--protein glycosyltransferase 48 kDa subunit OS=Mus musculus OX=10090 GN=Ddost PE=1 SV=2	1	6	6	6	5	5	6	5	5	5	6	5	5	5	6	5	12.5	12.5	12.5	49.027	441	441	0	20.722	By MS/MS	By MS/MS	By MS/MS	By MS/MS	0.76101	1.0209	7.4709	12	5	Leave out requantified	0.7168	0.017098	0.66959	0.77831	1.0179	0.020508	0.9728	0.96388
O54774	O54774	2	2	2	AP-3 complex subunit delta-1	Ap3d1	sp|O54774|AP3D1_MOUSE AP-3 complex subunit delta-1 OS=Mus musculus OX=10090 GN=Ap3d1 PE=1 SV=1	1	2	2	2	0	1	1	2	0	1	1	2	0	1	1	2	2.8	2.8	2.8	135.08	1199	1199	0	3.0899		By MS/MS	By MS/MS	By MS/MS	0.5642	0.7807	17.551	4	2	Median	NaN	NaN	NaN	0.74616	NaN	NaN	NaN	0.91831
O54825	O54825	3	3	3	Bystin	Bysl	sp|O54825|BYST_MOUSE Bystin OS=Mus musculus OX=10090 GN=Bysl PE=1 SV=3	1	3	3	3	1	3	1	1	1	3	1	1	1	3	1	1	6	6	6	49.783	436	436	0	4.5865	By MS/MS	By MS/MS	By MS/MS	By MS/MS	0.17204	0.24456	242.25	2	2	Median	NaN	0.17204	NaN	NaN	NaN	0.24456	NaN	NaN
O54908;Q9QYZ8	O54908;Q9QYZ8	2;1	2;1	2;1	Dickkopf-related protein 1;Dickkopf-related protein 2	Dkk1;Dkk2	sp|O54908|DKK1_MOUSE Dickkopf-related protein 1 OS=Mus musculus OX=10090 GN=Dkk1 PE=1 SV=2;sp|Q9QYZ8|DKK2_MOUSE Dickkopf-related protein 2 OS=Mus musculus OX=10090 GN=Dkk2 PE=1 SV=2	2	2	2	2	2	0	0	0	2	0	0	0	2	0	0	0	7	7	7	29.297	272	272;259	0	4.6239	By MS/MS				0.14678	0.20447	6.2236	2	2	Median	0.14678	NaN	NaN	NaN	0.20447	NaN	NaN	NaN
O54941	O54941	2	2	2	SWI/SNF-related matrix-associated actin-dependent regulator of chromatin subfamily E member 1	Smarce1	sp|O54941|SMCE1_MOUSE SWI/SNF-related matrix-associated actin-dependent regulator of chromatin subfamily E member 1 OS=Mus musculus OX=10090 GN=Smarce1 PE=1 SV=1	1	2	2	2	1	1	2	0	1	1	2	0	1	1	2	0	6.1	6.1	6.1	46.638	411	411	0	3.8784	By matching	By MS/MS	By MS/MS		0.77333	1.1055	10.452	3	0	Median	NaN	NaN	NaN	NaN	NaN	NaN	NaN	NaN
O54962	O54962	5	5	5	Barrier-to-autointegration factor;Barrier-to-autointegration factor, N-terminally processed	Banf1	sp|O54962|BAF_MOUSE Barrier-to-autointegration factor OS=Mus musculus OX=10090 GN=Banf1 PE=1 SV=1	1	5	5	5	4	3	3	5	4	3	3	5	4	3	3	5	50.6	50.6	50.6	10.102	89	89	0	23.599	By MS/MS	By MS/MS	By MS/MS	By MS/MS	0.82685	1.1207	11.412	14	7	Leave out requantified	0.76794	0.60169	0.75902	0.90756	1.0935	1.0387	1.0896	1.1059
O54984;A0A1B0GRE1	O54984	6;1	6;1	6;1	ATPase Asna1	Asna1	sp|O54984|ASNA_MOUSE ATPase Asna1 OS=Mus musculus OX=10090 GN=Asna1 PE=1 SV=2	2	6	6	6	4	5	5	5	4	5	5	5	4	5	5	5	20.1	20.1	20.1	38.822	348	348;131	0	17.546	By MS/MS	By MS/MS	By MS/MS	By MS/MS	0.81519	1.1849	7.0781	15	5	Leave out requantified	0.74153	0.71782	0.83779	0.35412	1.0391	1.1849	1.2116	0.44441
O55013	O55013	2	2	2	Trafficking protein particle complex subunit 3	Trappc3	sp|O55013|TPPC3_MOUSE Trafficking protein particle complex subunit 3 OS=Mus musculus OX=10090 GN=Trappc3 PE=1 SV=1	1	2	2	2	0	1	1	1	0	1	1	1	0	1	1	1	10.6	10.6	10.6	20.302	180	180	0	5.5605		By MS/MS	By MS/MS	By MS/MS	1.3274	1.5284	53.322	2	2	Median	NaN	NaN	NaN	NaN	NaN	NaN	NaN	NaN
O55029	O55029	8	8	8	Coatomer subunit beta	Copb2	sp|O55029|COPB2_MOUSE Coatomer subunit beta OS=Mus musculus OX=10090 GN=Copb2 PE=1 SV=2	1	8	8	8	2	5	7	2	2	5	7	2	2	5	7	2	11.8	11.8	11.8	102.45	905	905	0	29.294	By MS/MS	By MS/MS	By MS/MS	By MS/MS	0.87758	1.2821	10.585	10	5	Leave out requantified	0.96605	0.69524	0.76347	1.0562	1.172	1.1649	1.078	1.2909
O55125;Q5SVG6	O55125	3;1	3;1	3;1	Protein NipSnap homolog 1	Nipsnap1	sp|O55125|NIPS1_MOUSE Protein NipSnap homolog 1 OS=Mus musculus OX=10090 GN=Nipsnap1 PE=1 SV=1	2	3	3	3	2	2	1	1	2	2	1	1	2	2	1	1	11.6	11.6	11.6	33.363	284	284;136	0	3.5348	By MS/MS	By MS/MS	By matching	By MS/MS	0.47259	0.73815	135.43	6	2	Median	0.14376	0.18679	NaN	NaN	0.20465	0.25241	NaN	NaN
O55135;A6PWZ2;D6RG53;D6RJJ3;B1AZQ4	O55135	6;2;1;1;1	6;2;1;1;1	6;2;1;1;1	Eukaryotic translation initiation factor 6	Eif6	sp|O55135|IF6_MOUSE Eukaryotic translation initiation factor 6 OS=Mus musculus OX=10090 GN=Eif6 PE=1 SV=2	5	6	6	6	5	5	3	3	5	5	3	3	5	5	3	3	40.8	40.8	40.8	26.511	245	245;58;59;71;81	0	39.202	By MS/MS	By MS/MS	By MS/MS	By MS/MS	0.60507	0.95475	11.048	17	10	Leave out requantified	0.39655	0.40686	0.7074	0.43994	0.55108	0.57179	1.0323	0.55417
O55137;A0A1Y7VMZ4;Q9QYR7;Q91YQ6;Q32Q92;Q8BWN8;Q6Q2Z6	O55137	6;2;2;1;1;1;1	1;1;1;0;0;0;0	1;1;1;0;0;0;0	Acyl-coenzyme A thioesterase 1	Acot1	sp|O55137|ACOT1_MOUSE Acyl-coenzyme A thioesterase 1 OS=Mus musculus OX=10090 GN=Acot1 PE=1 SV=1	7	6	1	1	1	2	1	5	0	0	0	1	0	0	0	1	17.7	5.7	5.7	46.135	419	419;282;432;331;419;421;421	0.0025628	2.1705	By matching	By matching	By matching	By MS/MS	NaN	NaN	NaN	1	1	Median	NaN	NaN	NaN	NaN	NaN	NaN	NaN	NaN
O55142	O55142	8	8	8	60S ribosomal protein L35a	Rpl35a	sp|O55142|RL35A_MOUSE 60S ribosomal protein L35a OS=Mus musculus OX=10090 GN=Rpl35a PE=1 SV=2	1	8	8	8	5	7	6	5	5	7	6	5	5	7	6	5	48.2	48.2	48.2	12.554	110	110	0	20.751	By MS/MS	By MS/MS	By MS/MS	By MS/MS	0.67094	0.95454	2.1408	23	7	Leave out requantified	0.68499	0.548	0.61146	0.78358	1.0045	0.91935	0.88791	0.98805
O55143;Q8R429;B1ATS4;B1ATS5;E9Q559;Q64518	O55143	24;7;6;6;6;6	24;7;6;6;6;6	24;7;6;6;6;6	Sarcoplasmic/endoplasmic reticulum calcium ATPase 2	Atp2a2	sp|O55143|AT2A2_MOUSE Sarcoplasmic/endoplasmic reticulum calcium ATPase 2 OS=Mus musculus OX=10090 GN=Atp2a2 PE=1 SV=2	6	24	24	24	13	20	16	16	13	20	16	16	13	20	16	16	25.5	25.5	25.5	114.86	1044	1044;994;981;1020;1026;1038	0	93.328	By MS/MS	By MS/MS	By MS/MS	By MS/MS	0.83378	1.2005	13.627	66	28	Leave out requantified	0.90573	0.65123	0.75916	0.96116	1.2682	1.0976	1.1021	1.1737
O55201	O55201	1	1	1	Transcription elongation factor SPT5	Supt5h	sp|O55201|SPT5H_MOUSE Transcription elongation factor SPT5 OS=Mus musculus OX=10090 GN=Supt5h PE=1 SV=1	1	1	1	1	1	1	1	1	1	1	1	1	1	1	1	1	1.5	1.5	1.5	120.66	1082	1082	0	3.471	By MS/MS	By MS/MS	By matching	By matching	0.57705	0.83101	20.512	4	0	Median	NaN	NaN	NaN	NaN	NaN	NaN	NaN	NaN
O55222;A0A1B0GRF6;D3YZA5	O55222	4;1;1	4;1;1	4;1;1	Integrin-linked protein kinase	Ilk	sp|O55222|ILK_MOUSE Integrin-linked protein kinase OS=Mus musculus OX=10090 GN=Ilk PE=1 SV=2	3	4	4	4	2	1	3	0	2	1	3	0	2	1	3	0	9.1	9.1	9.1	51.373	452	452;233;295	0	9.2553	By MS/MS	By MS/MS	By MS/MS		0.87632	0.97444	38.849	3	2	Median	NaN	NaN	0.72773	NaN	NaN	NaN	0.91486	NaN
O55234;Q8BTY5	O55234;Q8BTY5	6;3	6;3	6;3	Proteasome subunit beta type-5	Psmb5	sp|O55234|PSB5_MOUSE Proteasome subunit beta type-5 OS=Mus musculus OX=10090 GN=Psmb5 PE=1 SV=3;tr|Q8BTY5|Q8BTY5_MOUSE Proteasome subunit beta type-5 OS=Mus musculus OX=10090 GN=Psmb5 PE=1 SV=1	2	6	6	6	4	4	4	4	4	4	4	4	4	4	4	4	26.5	26.5	26.5	28.532	264	264;177	0	28.555	By MS/MS	By MS/MS	By MS/MS	By MS/MS	0.61692	0.84433	7.6564	15	5	Leave out requantified	0.59269	0.49593	0.51808	0.68599	0.83282	0.83667	0.7516	0.83585
O70194;A0A2R8VK20	O70194	13;2	13;2	13;2	Eukaryotic translation initiation factor 3 subunit D	Eif3d	sp|O70194|EIF3D_MOUSE Eukaryotic translation initiation factor 3 subunit D OS=Mus musculus OX=10090 GN=Eif3d PE=1 SV=2	2	13	13	13	4	7	6	4	4	7	6	4	4	7	6	4	30.3	30.3	30.3	63.988	548	548;169	0	42.97	By MS/MS	By MS/MS	By MS/MS	By MS/MS	0.69588	1.0362	16.626	17	8	Leave out requantified	0.16382	0.62081	0.52166	0.73862	0.22821	1.0552	0.74022	0.90834
O70251;A0A087WS46;M0QWK5;M0QWH8;G3UX43;G3UZ47	O70251;A0A087WS46	10;9;1;1;1;1	8;7;1;1;1;1	8;7;1;1;1;1	Elongation factor 1-beta	Eef1b;Eef1b2	sp|O70251|EF1B_MOUSE Elongation factor 1-beta OS=Mus musculus OX=10090 GN=Eef1b PE=1 SV=5;tr|A0A087WS46|A0A087WS46_MOUSE Eukaryotic translation elongation factor 1 beta 2 OS=Mus musculus OX=10090 GN=Eef1b2 PE=1 SV=1	6	10	8	8	7	8	9	8	5	6	7	6	5	6	7	6	36.4	31.6	31.6	24.693	225	225;184;43;48;68;94	0	37.128	By MS/MS	By MS/MS	By MS/MS	By MS/MS	0.54262	0.79846	11.423	29	5	Leave out requantified	0.54083	0.49062	0.54441	0.64246	0.76435	0.82043	0.81826	0.79173
O70310;F7APP3	O70310	6;1	6;1	5;0	Glycylpeptide N-tetradecanoyltransferase 1	Nmt1	sp|O70310|NMT1_MOUSE Glycylpeptide N-tetradecanoyltransferase 1 OS=Mus musculus OX=10090 GN=Nmt1 PE=1 SV=1	2	6	6	5	5	5	5	4	5	5	5	4	5	4	4	4	15.7	15.7	12.9	56.888	496	496;485	0	44.411	By MS/MS	By MS/MS	By MS/MS	By MS/MS	0.60611	0.89394	8.9133	20	1	Leave out requantified	0.63925	0.53249	0.57713	0.74064	0.89684	0.89531	0.82962	0.90984
O70318;Q80UE5;Q80UE4;A0A1W2P7I2;A0A1W2P6I5;A0A1W2P8C0	O70318;Q80UE5;Q80UE4	6;5;4;2;2;1	6;5;4;2;2;1	5;4;3;2;1;1	Band 4.1-like protein 2	Epb41l2;Epb4.1l2	sp|O70318|E41L2_MOUSE Band 4.1-like protein 2 OS=Mus musculus OX=10090 GN=Epb41l2 PE=1 SV=2;tr|Q80UE5|Q80UE5_MOUSE Band 4.1-like protein 2 OS=Mus musculus OX=10090 GN=Epb41l2 PE=1 SV=1;tr|Q80UE4|Q80UE4_MOUSE Band 4.1-like protein 2 OS=Mus musculus OX=10090	6	6	6	5	2	4	5	2	2	4	5	2	1	3	4	2	7	7	6.3	109.94	988	988;918;794;201;513;204	0	12.505	By MS/MS	By MS/MS	By MS/MS	By MS/MS	0.67927	0.9654	11.381	10	5	Leave out requantified	0.73557	0.44312	0.41654	NaN	1.0231	0.75095	0.54309	NaN
O70378;M0QWY0;M0QWP2	O70378;M0QWY0;M0QWP2	4;3;3	4;3;3	4;3;3	ER membrane protein complex subunit 8	Emc8	sp|O70378|EMC8_MOUSE ER membrane protein complex subunit 8 OS=Mus musculus OX=10090 GN=Emc8 PE=1 SV=1;tr|M0QWY0|M0QWY0_MOUSE ER membrane protein complex subunit 8 (Fragment) OS=Mus musculus OX=10090 GN=Emc8 PE=1 SV=1;tr|M0QWP2|M0QWP2_MOUSE ER membrane prot	3	4	4	4	2	3	2	2	2	3	2	2	2	3	2	2	26.6	26.6	26.6	23.348	207	207;128;143	0	11.554	By MS/MS	By MS/MS	By MS/MS	By MS/MS	0.79663	1.0858	19.861	7	2	Leave out requantified	0.84217	0.12704	0.27039	NaN	1.1819	0.17846	0.34642	NaN
O70435;E0CX62;E0CZ34;F8WH02;E0CYL6	O70435	9;4;1;1;1	9;4;1;1;1	9;4;1;1;1	Proteasome subunit alpha type-3	Psma3	sp|O70435|PSA3_MOUSE Proteasome subunit alpha type-3 OS=Mus musculus OX=10090 GN=Psma3 PE=1 SV=3	5	9	9	9	8	5	5	5	8	5	5	5	8	5	5	5	31.8	31.8	31.8	28.405	255	255;180;35;40;52	0	26.142	By MS/MS	By MS/MS	By MS/MS	By MS/MS	0.61112	0.87109	116.47	22	10	Leave out requantified	0.61203	0.5021	0.54507	0.79878	0.86426	0.83961	0.79452	1.001
O70456	O70456	4	1	1	14-3-3 protein sigma	Sfn	sp|O70456|1433S_MOUSE 14-3-3 protein sigma OS=Mus musculus OX=10090 GN=Sfn PE=1 SV=2	1	4	1	1	3	4	3	4	1	1	1	1	1	1	1	1	13.3	3.2	3.2	27.706	248	248	0.0010571	2.448	By MS/MS	By MS/MS	By MS/MS	By MS/MS	0.74188	1.025	3.7718	4	0	Median	NaN	NaN	NaN	NaN	NaN	NaN	NaN	NaN
[truncated: 1,471 more rows]
[truncated: 47 more columns]

## Sheet: 2_N2a_IN_WT vs. KO_Statistics
Peptides WT(light)/cl10(heavy)_IN_1	Peptides WT(light)/cl10(heavy)_IN_2	Peptides WT(light)/cl10(heavy)_IN_3	Peptides WT(light)/cl10(heavy)_IN_4	Ratio H/L normalized	Ratio H/L normalized WT(light)/cl10(heavy)_IN_1	Ratio H/L normalized WT(light)/cl10(heavy)_IN_2	Ratio H/L normalized WT(light)/cl10(heavy)_IN_3	Ratio H/L normalized WT(light)/cl10(heavy)_IN_4	T-test Significant IN	#NAME?	T-test Difference IN	T-test Significant	#NAME?	T-test q-value	T-test Difference	Protein names	Gene names
[truncated: 1,100 more rows]

[truncated: 7 more sheets: 3_SH-SY5Y_IN_WT vs. KO_original, 4_SH-SY5Y_IN_WT vs. KO_Stats, 5_LCL_IN_Original, 6_LCL_IN_ctrl1. vs. V335M_Stats, 7_LCL_IN_ctrl2. vs. V335M_Stats, 8_LCL_IN_ctrl3. vs. D628V_Stats, 9_LCL_IN_ctrl4. vs. D628V_Stats]
