# Supplementary material for: ALS-linked loss of Cyclin-F function affects HSP90
Source: Life Sci Alliance. 2022 Sep 16;5(12):e202101359. doi: 10.26508/lsa.202101359 (PMC9481933; doi:10.26508/lsa.202101359)
Supplement: Supplementary file 3 [file LSA-2021-01359_TableS3.xlsx]

## Sheet: Legend
Tab #	Experiment	Type of data	Type of experiment	Cells & growth conditions	Related to
1	HA-IP	MaxQuant data without filterting	HA Immunoprecipitation followed by Mass Spectrometry comparing cells overexpressing CCNF vs. TBC1D7	N2a cells overexpressing pHAGE-FLAG-HA-CCNF/TBC1D7	Figure 2, S2 and 3
2	HA-IP	Data after Perseus analysis	HA Immunoprecipitation followed by Mass Spectrometry comparing cells overexpressing CCNF vs. TBC1D7	N2a cells overexpressing pHAGE-FLAG-HA-CCNF/TBC1D7	Figure 2, S2 and 3
3	HA-IP	MaxQuant data without filterting	HA Immunoprecipitation followed by Mass Spectrometry comparing cells overexpressing CCNF vs. TBC1D7	SH-SY5Y cells overexpressing pHAGE-FLAG-HA-CCNF/TBC1D7	Figure 2, S2 and 3
4	HA-IP	Data after Perseus analysis	HA Immunoprecipitation followed by Mass Spectrometry comparing cells overexpressing CCNF vs. TBC1D7	SH-SY5Y cells overexpressing pHAGE-FLAG-HA-CCNF/TBC1D7	Figure 2, S2 and 3
	Labelling in Paper	Labelling in Table
	pHAGE-FLAG-HA-CCNF	HA-CCNF / 2-CCNF
	pHAGE-FLAG-HA-TBC1D7	HA-TBC1D7/ 2-TBC
	Perseus Processing
	Filtering of contaminants
	Categorical annotation peptides
	Filter rows (Min valids = 3, In at least one group, Values = Greater than 1)
	Log2 transform LFQ values
	Replace missing values for LFQ values (Total matrix)
	Categorical annotation LFQ
	Two Sample t-test, pVal < 0.05
	Two Sample t-test, FDR, qVal < 0.05

## Sheet: 1_N2a_HA-IP_Orig.
Protein IDs	Majority protein IDs	Peptide counts (all)	Peptide counts (razor+unique)	Peptide counts (unique)	Protein names	Gene names	Fasta headers	Number of proteins	Peptides	Razor + unique peptides	Unique peptides	Peptides 2-CCNF_1	Peptides 2-CCNF_2	Peptides 2-CCNF_3	Peptides 2-TBC1D7	Peptides 2-TBC1D7_2	Peptides 2-TBC1D7_3	Razor + unique peptides 2-CCNF_1	Razor + unique peptides 2-CCNF_2	Razor + unique peptides 2-CCNF_3	Razor + unique peptides 2-TBC1D7	Razor + unique peptides 2-TBC1D7_2	Razor + unique peptides 2-TBC1D7_3	Unique peptides 2-CCNF_1	Unique peptides 2-CCNF_2	Unique peptides 2-CCNF_3	Unique peptides 2-TBC1D7	Unique peptides 2-TBC1D7_2	Unique peptides 2-TBC1D7_3	Sequence coverage [%]	Unique + razor sequence coverage [%]	Unique sequence coverage [%]	Mol. weight [kDa]	Sequence length	Sequence lengths	Q-value	Score	Identification type 2-CCNF_1	Identification type 2-CCNF_2	Identification type 2-CCNF_3	Identification type 2-TBC1D7	Identification type 2-TBC1D7_2	Identification type 2-TBC1D7_3	Sequence coverage 2-CCNF_1 [%]	Sequence coverage 2-CCNF_2 [%]	Sequence coverage 2-CCNF_3 [%]	Sequence coverage 2-TBC1D7 [%]	Sequence coverage 2-TBC1D7_2 [%]	Sequence coverage 2-TBC1D7_3 [%]
A0A075B5P4;A0A0A6YWR2	A0A075B5P4;A0A0A6YWR2	6;5	6;5	1;1		Ighg1	tr|A0A075B5P4|A0A075B5P4_MOUSE Ig gamma-1 chain C region secreted form (Fragment) OS=Mus musculus OX=10090 GN=Ighg1 PE=1 SV=1;tr|A0A0A6YWR2|A0A0A6YWR2_MOUSE Ig gamma-1 chain C region secreted form (Fragment) OS=Mus musculus OX=10090 GN=Ighg1 PE=1 SV=1	2	6	6	1	5	6	6	5	5	5	5	6	6	5	5	5	1	1	1	1	1	1	19.4	19.4	5.2	35.633	324	324;393	0	104.71	By MS/MS	By MS/MS	By MS/MS	By MS/MS	By MS/MS	By MS/MS	17	19.4	19.4	16.4	17	17
A0A075B5Q0;P18526;P18524;A0A075B5Q6;A0A075B5R1;A0A075B5Q4;A0A075B5Q2;A0A075B5P9;A0A0A6YVS4;P18528;P18530;P18525	A0A075B5Q0;P18526;P18524	3;3;3;1;1;1;1;1;1;1;1;1	3;3;3;1;1;1;1;1;1;1;1;1	3;3;3;1;1;1;1;1;1;1;1;1	Ig heavy chain V region 345;Ig heavy chain V region RF	Ighv5-6	tr|A0A075B5Q0|A0A075B5Q0_MOUSE Immunoglobulin heavy variable 5-6 (Fragment) OS=Mus musculus OX=10090 GN=Ighv5-6 PE=4 SV=1;sp|P18526|HVM55_MOUSE Ig heavy chain V region 345 OS=Mus musculus OX=10090 PE=1 SV=1;sp|P18524|HVM53_MOUSE Ig heavy chain V region RF	12	3	3	3	3	3	3	3	3	3	3	3	3	3	3	3	3	3	3	3	3	3	17.1	17.1	17.1	12.863	117	117;117;117;116;117;117;117;117;126;98;117;117	0	88.577	By MS/MS	By MS/MS	By MS/MS	By matching	By MS/MS	By MS/MS	17.1	17.1	17.1	17.1	17.1	17.1
A0A087WS04;A0A087WQD0;A0A087WNW3;A0A087WS23;A0A087WQ25;A0A087WQQ5;A0A087WP85;A0A087WPX0;F8VQC7;A0A087WQF8;A0A087WP48;A0A087WS29;A0A087WQG4;A0A087WQI3;A0A087WPW5;A0A087WRS1;A0A087WP14;A0A087WR91;A0A087WPY8	A0A087WS04;A0A087WQD0;A0A087WNW3;A0A087WS23;A0A087WQ25;A0A087WQQ5;A0A087WP85;A0A087WPX0;F8VQC7;A0A087WQF8;A0A087WP48;A0A087WS29;A0A087WQG4;A0A087WQI3;A0A087WPW5;A0A087WRS1;A0A087WP14	10;10;10;10;10;10;10;10;10;9;9;9;9;9;9;9;9;1;1	10;10;10;10;10;10;10;10;10;9;9;9;9;9;9;9;9;1;1	1;1;1;1;1;1;1;1;1;1;1;1;1;1;1;1;1;0;0		Ktn1	tr|A0A087WS04|A0A087WS04_MOUSE Kinectin OS=Mus musculus OX=10090 GN=Ktn1 PE=1 SV=1;tr|A0A087WQD0|A0A087WQD0_MOUSE Kinectin OS=Mus musculus OX=10090 GN=Ktn1 PE=1 SV=1;tr|A0A087WNW3|A0A087WNW3_MOUSE Kinectin OS=Mus musculus OX=10090 GN=Ktn1 PE=1 SV=1;tr|A0A0	19	10	10	1	9	9	10	6	7	6	9	9	10	6	7	6	1	1	1	0	1	1	8.7	8.7	1.4	140.55	1224	1224;1247;1247;1253;1270;1275;1275;1304;1327;1200;1223;1228;1229;1252;1252;1275;1280;176;178	0	103.05	By MS/MS	By MS/MS	By MS/MS	By matching	By matching	By MS/MS	7.9	8.2	8.7	5.1	6.5	5.9
A0A087WRV6;A0A087WNZ7;G5E870	A0A087WRV6;A0A087WNZ7;G5E870	1;1;1	1;1;1	1;1;1	E3 ubiquitin-protein ligase TRIP12	Trip12	tr|A0A087WRV6|A0A087WRV6_MOUSE E3 ubiquitin-protein ligase TRIP12 (Fragment) OS=Mus musculus OX=10090 GN=Trip12 PE=1 SV=1;tr|A0A087WNZ7|A0A087WNZ7_MOUSE E3 ubiquitin-protein ligase TRIP12 OS=Mus musculus OX=10090 GN=Trip12 PE=1 SV=1;sp|G5E870|TRIPC_MOUSE E	3	1	1	1	1	1	1	0	0	0	1	1	1	0	0	0	1	1	1	0	0	0	2	2	2	94.9	830	830;1992;2025	0	8.1735	By matching	By matching	By MS/MS				2	2	2	0	0	0
F6Q2E3;A0A087WPH7;A2AGN7;B7ZCF1;O88685	F6Q2E3;A0A087WPH7;A2AGN7;B7ZCF1;O88685	1;1;1;1;1	1;1;1;1;1	1;1;1;1;1	26S protease regulatory subunit 6A	Psmc3	tr|F6Q2E3|F6Q2E3_MOUSE 26S proteasome regulatory subunit 6A (Fragment) OS=Mus musculus OX=10090 GN=Psmc3 PE=1 SV=1;tr|A0A087WPH7|A0A087WPH7_MOUSE 26S proteasome regulatory subunit 6A (Fragment) OS=Mus musculus OX=10090 GN=Psmc3 PE=1 SV=6;tr|A2AGN7|A2AGN7_M	5	1	1	1	1	1	1	1	1	1	1	1	1	1	1	1	1	1	1	1	1	1	4.4	4.4	4.4	22.833	203	203;305;400;451;442	0	6.5308	By MS/MS	By matching	By matching	By matching	By matching	By MS/MS	4.4	4.4	4.4	4.4	4.4	4.4
Q3UR42;A0A087WPL5;E9QNN1;O70133;A0A0R4J2C3	Q3UR42;A0A087WPL5;E9QNN1;O70133;A0A0R4J2C3	2;2;2;2;1	2;2;2;2;1	2;2;2;2;1	ATP-dependent RNA helicase A	Dhx9	tr|Q3UR42|Q3UR42_MOUSE ATP-dependent RNA helicase A (Fragment) OS=Mus musculus OX=10090 GN=Dhx9 PE=1 SV=1;tr|A0A087WPL5|A0A087WPL5_MOUSE ATP-dependent RNA helicase A OS=Mus musculus OX=10090 GN=Dhx9 PE=1 SV=1;tr|E9QNN1|E9QNN1_MOUSE ATP-dependent RNA helica	5	2	2	2	1	2	2	1	2	2	1	2	2	1	2	2	1	2	2	1	2	2	2.4	2.4	2.4	82.47	735	735;1383;1384;1380;459	0	11.367	By matching	By MS/MS	By matching	By matching	By matching	By MS/MS	1.2	2.4	2.4	1.2	2.4	2.4
A0A087WQ46;Q6DFW4	A0A087WQ46;Q6DFW4	1;1	1;1	1;1	Nucleolar protein 58	Nop58	tr|A0A087WQ46|A0A087WQ46_MOUSE Nucleolar protein 58 (Fragment) OS=Mus musculus OX=10090 GN=Nop58 PE=1 SV=1;sp|Q6DFW4|NOP58_MOUSE Nucleolar protein 58 OS=Mus musculus OX=10090 GN=Nop58 PE=1 SV=1	2	1	1	1	1	1	1	0	0	0	1	1	1	0	0	0	1	1	1	0	0	0	6.6	6.6	6.6	23.833	213	213;536	0	13.978	By matching	By MS/MS	By matching				6.6	6.6	6.6	0	0	0
A0A087WRN1;A0A087WQA0;F8WI22;Q8K019	A0A087WRN1;A0A087WQA0;F8WI22;Q8K019	1;1;1;1	1;1;1;1	1;1;1;1	Bcl-2-associated transcription factor 1	Bclaf1	tr|A0A087WRN1|A0A087WRN1_MOUSE Bcl-2-associated transcription factor 1 (Fragment) OS=Mus musculus OX=10090 GN=Bclaf1 PE=1 SV=1;tr|A0A087WQA0|A0A087WQA0_MOUSE Bcl-2-associated transcription factor 1 OS=Mus musculus OX=10090 GN=Bclaf1 PE=1 SV=1;tr|F8WI22|F8W	4	1	1	1	1	1	1	1	1	1	1	1	1	1	1	1	1	1	1	1	1	1	2.2	2.2	2.2	67.703	583	583;750;870;919	0.0053763	5.9603	By matching	By matching	By MS/MS	By matching	By MS/MS	By MS/MS	2.2	2.2	2.2	2.2	2.2	2.2
A0A087WQQ3;A0A087WRE9;Q9CQJ4	A0A087WQQ3;A0A087WRE9;Q9CQJ4	1;1;1	1;1;1	1;1;1	E3 ubiquitin-protein ligase RING2	Rnf2	tr|A0A087WQQ3|A0A087WQQ3_MOUSE E3 ubiquitin-protein ligase RING2 (Fragment) OS=Mus musculus OX=10090 GN=Rnf2 PE=1 SV=1;tr|A0A087WRE9|A0A087WRE9_MOUSE E3 ubiquitin-protein ligase RING2 OS=Mus musculus OX=10090 GN=Rnf2 PE=1 SV=1;sp|Q9CQJ4|RING2_MOUSE E3 ubiq	3	1	1	1	1	1	1	1	0	1	1	1	1	1	0	1	1	1	1	1	0	1	19.2	19.2	19.2	8.2685	73	73;264;336	0	18.042	By MS/MS	By MS/MS	By MS/MS	By matching		By matching	19.2	19.2	19.2	19.2	0	19.2
A0A087WS99;B7ZNJ1;A0A087WS56;B9EHT6;A0A087WSN6;Q3UHL6;A0A087WR50;P11276	A0A087WS99;B7ZNJ1;A0A087WS56;B9EHT6;A0A087WSN6;Q3UHL6;A0A087WR50;P11276	1;1;1;1;1;1;1;1	1;1;1;1;1;1;1;1	1;1;1;1;1;1;1;1	Fibronectin;Anastellin	Fn1	tr|A0A087WS99|A0A087WS99_MOUSE Fibronectin (Fragment) OS=Mus musculus OX=10090 GN=Fn1 PE=1 SV=1;tr|B7ZNJ1|B7ZNJ1_MOUSE Fibronectin OS=Mus musculus OX=10090 GN=Fn1 PE=1 SV=1;tr|A0A087WS56|A0A087WS56_MOUSE Fibronectin OS=Mus musculus OX=10090 GN=Fn1 PE=1 SV=	8	1	1	1	1	1	1	0	0	0	1	1	1	0	0	0	1	1	1	0	0	0	7	7	7	21.694	200	200;2176;2266;2271;2296;2361;2386;2477	0.0053476	5.9488	By matching	By matching	By MS/MS				7	7	7	0	0	0
A0A087WS76;A0A140LHL6;E9Q3S4	A0A087WS76;A0A140LHL6;E9Q3S4	1;1;1	1;1;1	1;1;1	Mitogen-activated protein kinase kinase kinase 19	Map3k19	tr|A0A087WS76|A0A087WS76_MOUSE Mitogen-activated protein kinase kinase kinase 19 (Fragment) OS=Mus musculus OX=10090 GN=Map3k19 PE=4 SV=2;tr|A0A140LHL6|A0A140LHL6_MOUSE Mitogen-activated protein kinase kinase kinase 19 OS=Mus musculus OX=10090 GN=Map3k19 P	3	1	1	1	1	1	0	1	1	1	1	1	0	1	1	1	1	1	0	1	1	1	0.6	0.6	0.6	135.87	1211	1211;1515;1311	0.0034014	6.0955	By MS/MS	By MS/MS		By matching	By MS/MS	By MS/MS	0.6	0.6	0	0.6	0.6	0.6
A0A0A0MQ80;Q3UMC0;A0A0G2JFY0	A0A0A0MQ80;Q3UMC0;A0A0G2JFY0	5;5;4	5;5;4	5;5;4	Spermatogenesis-associated protein 5	Spata5	tr|A0A0A0MQ80|A0A0A0MQ80_MOUSE Spermatogenesis-associated protein 5 OS=Mus musculus OX=10090 GN=Spata5 PE=1 SV=1;sp|Q3UMC0|SPAT5_MOUSE Spermatogenesis-associated protein 5 OS=Mus musculus OX=10090 GN=Spata5 PE=1 SV=2;tr|A0A0G2JFY0|A0A0G2JFY0_MOUSE Spermato	3	5	5	5	4	5	5	2	1	4	4	5	5	2	1	4	4	5	5	2	1	4	5.4	5.4	5.4	97.156	892	892;893;842	0	36.66	By MS/MS	By MS/MS	By MS/MS	By matching	By matching	By matching	5.2	5.4	5.4	2.8	0.9	4.4
A0A0A0MQD4;Q8K201	A0A0A0MQD4;Q8K201	1;1	1;1	1;1	Keratinocyte-associated transmembrane protein 2	9530068E07Rik;Kct2	tr|A0A0A0MQD4|A0A0A0MQD4_MOUSE RIKEN cDNA 9530068E07 gene OS=Mus musculus OX=10090 GN=9530068E07Rik PE=1 SV=1;sp|Q8K201|KCT2_MOUSE Keratinocyte-associated transmembrane protein 2 OS=Mus musculus OX=10090 GN=Kct2 PE=1 SV=2	2	1	1	1	1	1	1	0	1	1	1	1	1	0	1	1	1	1	1	0	1	1	4	4	4	27.292	251	251;259	0.0011468	6.1299	By MS/MS	By matching	By matching		By matching	By matching	4	4	4	0	4	4
A0A0A0MQN8;H3BIX4;Z4YLB7;P97300	A0A0A0MQN8;H3BIX4;Z4YLB7;P97300	1;1;1;1	1;1;1;1	1;1;1;1	Neuroplastin	Nptn	tr|A0A0A0MQN8|A0A0A0MQN8_MOUSE Neuroplastin OS=Mus musculus OX=10090 GN=Nptn PE=1 SV=1;tr|H3BIX4|H3BIX4_MOUSE Neuroplastin (Fragment) OS=Mus musculus OX=10090 GN=Nptn PE=1 SV=1;tr|Z4YLB7|Z4YLB7_MOUSE Neuroplastin OS=Mus musculus OX=10090 GN=Nptn PE=1 SV=1;	4	1	1	1	1	1	1	0	1	1	1	1	1	0	1	1	1	1	1	0	1	1	7.4	7.4	7.4	13.163	122	122;221;277;397	0.0044297	6.0284	By MS/MS	By MS/MS	By MS/MS		By matching	By matching	7.4	7.4	7.4	0	7.4	7.4
F7C106;A0A0A6YVR0;Q9D881;P19536	F7C106;A0A0A6YVR0;Q9D881;P19536	1;1;1;1	1;1;1;1	1;1;1;1	Cytochrome c oxidase subunit 5B, mitochondrial	Cox5b	tr|F7C106|F7C106_MOUSE Cytochrome c oxidase subunit 5B, mitochondrial OS=Mus musculus OX=10090 GN=Cox5b PE=1 SV=2;tr|A0A0A6YVR0|A0A0A6YVR0_MOUSE Cytochrome c oxidase subunit 5B, mitochondrial (Fragment) OS=Mus musculus OX=10090 GN=Cox5b PE=1 SV=1;tr|Q9D881	4	1	1	1	1	1	1	1	1	1	1	1	1	1	1	1	1	1	1	1	1	1	9.4	9.4	9.4	9.0144	85	85;98;129;128	1	-2	By MS/MS	By MS/MS	By MS/MS	By matching	By matching	By matching	9.4	9.4	9.4	9.4	9.4	9.4
A0A0A6YVU0;A0A0A6YWP6;A0A0A6YX18;Q8BVE3	A0A0A6YVU0;A0A0A6YWP6;A0A0A6YX18;Q8BVE3	1;1;1;1	1;1;1;1	1;1;1;1	V-type proton ATPase subunit H	Atp6v1h	tr|A0A0A6YVU0|A0A0A6YVU0_MOUSE V-type proton ATPase subunit H (Fragment) OS=Mus musculus OX=10090 GN=Atp6v1h PE=1 SV=1;tr|A0A0A6YWP6|A0A0A6YWP6_MOUSE V-type proton ATPase subunit H OS=Mus musculus OX=10090 GN=Atp6v1h PE=1 SV=1;tr|A0A0A6YX18|A0A0A6YX18_MOUS	4	1	1	1	1	1	1	0	1	1	1	1	1	0	1	1	1	1	1	0	1	1	10.7	10.7	10.7	16.265	140	140;441;465;483	0.0011751	6.223	By matching	By MS/MS	By MS/MS		By matching	By matching	10.7	10.7	10.7	0	10.7	10.7
A0A0A6YVU8;Q9JKV1	A0A0A6YVU8;Q9JKV1	1;1	1;1	1;1	Proteasomal ubiquitin receptor ADRM1	Gm9774;Adrm1	tr|A0A0A6YVU8|A0A0A6YVU8_MOUSE MCG119397 OS=Mus musculus OX=10090 GN=Gm9774 PE=4 SV=1;sp|Q9JKV1|ADRM1_MOUSE Proteasomal ubiquitin receptor ADRM1 OS=Mus musculus OX=10090 GN=Adrm1 PE=1 SV=2	2	1	1	1	1	1	1	1	1	1	1	1	1	1	1	1	1	1	1	1	1	1	3.9	3.9	3.9	42.147	407	407;407	0	11.134	By MS/MS	By MS/MS	By MS/MS	By matching	By matching	By MS/MS	3.9	3.9	3.9	3.9	3.9	3.9
A0A0A6YVZ8;B7ZNR9;B2RUE8;A0A0A6YWR8;F8VPL5;A0A0A6YWM8;E9PVG7;A0A0A6YW53;P97820	A0A0A6YVZ8;B7ZNR9;B2RUE8;A0A0A6YWR8;F8VPL5;A0A0A6YWM8;E9PVG7;A0A0A6YW53;P97820	1;1;1;1;1;1;1;1;1	1;1;1;1;1;1;1;1;1	1;1;1;1;1;1;1;1;1	Mitogen-activated protein kinase kinase kinase kinase 4	Map4k4	tr|A0A0A6YVZ8|A0A0A6YVZ8_MOUSE Mitogen-activated protein kinase kinase kinase kinase 4 (Fragment) OS=Mus musculus OX=10090 GN=Map4k4 PE=1 SV=1;tr|B7ZNR9|B7ZNR9_MOUSE Map4k4 protein OS=Mus musculus OX=10090 GN=Map4k4 PE=1 SV=1;tr|B2RUE8|B2RUE8_MOUSE Map4k4	9	1	1	1	1	1	1	0	0	1	1	1	1	0	0	1	1	1	1	0	0	1	2.5	2.5	2.5	46.798	404	404;1208;1221;1234;1238;1272;1288;1288;1233	0	6.7543	By MS/MS	By MS/MS	By MS/MS			By matching	2.5	2.5	2.5	0	0	2.5
A0A2I3BPG9;A0A0A6YW33;P83882	A0A2I3BPG9;A0A0A6YW33;P83882	2;2;2	2;2;2	2;2;2	60S ribosomal protein L36a	Gm6525;Rpl36a	tr|A0A2I3BPG9|A0A2I3BPG9_MOUSE MCG113838 OS=Mus musculus OX=10090 GN=Rpl36a-ps1 PE=3 SV=1;tr|A0A0A6YW33|A0A0A6YW33_MOUSE MCG18090 OS=Mus musculus OX=10090 GN=Gm6525 PE=4 SV=1;sp|P83882|RL36A_MOUSE 60S ribosomal protein L36a OS=Mus musculus OX=10090 GN=Rpl3	3	2	2	2	2	1	1	2	2	2	2	1	1	2	2	2	2	1	1	2	2	2	9.4	9.4	9.4	12.455	106	106;106;106	0	14.27	By MS/MS	By MS/MS	By MS/MS	By matching	By MS/MS	By MS/MS	9.4	9.4	9.4	9.4	9.4	9.4
A0A0A6YW67;E9Q9J0;E9Q4P0;E9Q5F6;E9QNP0;Q5SX22;P62984;P62983;P0CG49;P0CG50;D3YYZ2	A0A0A6YW67;E9Q9J0;E9Q4P0;E9Q5F6;E9QNP0;Q5SX22;P62984;P62983;P0CG49;P0CG50;D3YYZ2	4;4;4;4;4;4;4;4;4;4;2	4;4;4;4;4;4;4;4;4;4;2	4;4;4;4;4;4;4;4;4;4;2	Ubiquitin-60S ribosomal protein L40;Ubiquitin;60S ribosomal protein L40;Ubiquitin-40S ribosomal protein S27a;Ubiquitin;40S ribosomal protein S27a;Polyubiquitin-B;Ubiquitin;Polyubiquitin-C;Ubiquitin;Ubiquitin-related 1;Ubiquitin-related 2	Gm8797;Uba52;Kxd1;Ubc;Ubb;Rps27a;Gm5239	tr|A0A0A6YW67|A0A0A6YW67_MOUSE MCG23377, isoform CRA_b OS=Mus musculus OX=10090 GN=Gm8797 PE=4 SV=1;tr|E9Q9J0|E9Q9J0_MOUSE Ubiquitin-60S ribosomal protein L40 (Fragment) OS=Mus musculus OX=10090 GN=Uba52 PE=4 SV=1;tr|E9Q4P0|E9Q4P0_MOUSE KxDL motif-containi	11	4	4	4	4	4	4	4	4	4	4	4	4	4	4	4	4	4	4	4	4	4	61	61	61	8.7279	77	77;96;193;201;232;236;128;156;305;734;122	0	34.939	By MS/MS	By MS/MS	By MS/MS	By matching	By MS/MS	By MS/MS	61	61	61	61	61	61
A0A0A6YWR1;D3YVN1;A0A0A6YWG8;Q9Z2N8	A0A0A6YWR1;D3YVN1;A0A0A6YWG8;Q9Z2N8	2;2;2;2	2;2;2;2	2;2;2;2	Actin-like protein 6A	Actl6a	tr|A0A0A6YWR1|A0A0A6YWR1_MOUSE Actin-like protein 6A (Fragment) OS=Mus musculus OX=10090 GN=Actl6a PE=1 SV=1;tr|D3YVN1|D3YVN1_MOUSE Actin-like protein 6A (Fragment) OS=Mus musculus OX=10090 GN=Actl6a PE=1 SV=1;tr|A0A0A6YWG8|A0A0A6YWG8_MOUSE Actin-like prot	4	2	2	2	2	2	2	0	2	0	2	2	2	0	2	0	2	2	2	0	2	0	44.4	44.4	44.4	6.0457	54	54;204;245;429	0	11.358	By MS/MS	By MS/MS	By matching		By matching		44.4	44.4	44.4	0	44.4	0
A0A0A6YXU9;P27090	A0A0A6YXU9;P27090	1;1	1;1	1;1	Transforming growth factor beta-2;Latency-associated peptide	Tgfb2	tr|A0A0A6YXU9|A0A0A6YXU9_MOUSE Transforming growth factor beta-2 OS=Mus musculus OX=10090 GN=Tgfb2 PE=1 SV=1;sp|P27090|TGFB2_MOUSE Transforming growth factor beta-2 OS=Mus musculus OX=10090 GN=Tgfb2 PE=1 SV=2	2	1	1	1	1	1	1	0	0	0	1	1	1	0	0	0	1	1	1	0	0	0	3.6	3.6	3.6	50.461	442	442;414	0	17.016	By MS/MS	By MS/MS	By MS/MS				3.6	3.6	3.6	0	0	0
A0A0B4J1I9;A0A0B4J1I4;A0A0A6YYE7	A0A0B4J1I9;A0A0B4J1I4;A0A0A6YYE7	1;1;1	1;1;1	1;1;1		Igkv4-55;Igkv4-72;Igkv4-57	tr|A0A0B4J1I9|A0A0B4J1I9_MOUSE Immunoglobulin kappa variable 4-55 (Fragment) OS=Mus musculus OX=10090 GN=Igkv4-55 PE=1 SV=1;tr|A0A0B4J1I4|A0A0B4J1I4_MOUSE Immunoglobulin kappa chain variable 4-72 (Fragment) OS=Mus musculus OX=10090 GN=Igkv4-72 PE=4 SV=1;tr	3	1	1	1	1	1	1	1	1	1	1	1	1	1	1	1	1	1	1	1	1	1	13.7	13.7	13.7	12.736	117	117;117;117	0	14.708	By MS/MS	By MS/MS	By MS/MS	By MS/MS	By MS/MS	By matching	13.7	13.7	13.7	13.7	13.7	13.7
A0A0B4J1E2;Q9CSN1	A0A0B4J1E2;Q9CSN1	2;2	2;2	2;2	SNW domain-containing protein 1	Snw1	tr|A0A0B4J1E2|A0A0B4J1E2_MOUSE SNW domain-containing protein 1 OS=Mus musculus OX=10090 GN=Snw1 PE=1 SV=1;sp|Q9CSN1|SNW1_MOUSE SNW domain-containing protein 1 OS=Mus musculus OX=10090 GN=Snw1 PE=1 SV=3	2	2	2	2	2	2	2	1	2	2	2	2	2	1	2	2	2	2	2	1	2	2	4.7	4.7	4.7	61.461	536	536;536	0	14.225	By MS/MS	By MS/MS	By MS/MS	By matching	By matching	By matching	4.7	4.7	4.7	2.8	4.7	4.7
A0A0G2JDF1;A0A0G2JDN3;Q99MR6	A0A0G2JDF1;A0A0G2JDN3;Q99MR6	1;1;1	1;1;1	1;1;1	Serrate RNA effector molecule homolog	Srrt	tr|A0A0G2JDF1|A0A0G2JDF1_MOUSE Serrate RNA effector molecule homolog (Fragment) OS=Mus musculus OX=10090 GN=Srrt PE=1 SV=1;tr|A0A0G2JDN3|A0A0G2JDN3_MOUSE Serrate RNA effector molecule homolog OS=Mus musculus OX=10090 GN=Srrt PE=1 SV=1;sp|Q99MR6|SRRT_MOUSE	3	1	1	1	1	1	0	0	0	0	1	1	0	0	0	0	1	1	0	0	0	0	4.2	4.2	4.2	26.568	239	239;467;875	0.0053706	5.9579	By MS/MS	By MS/MS					4.2	4.2	0	0	0	0
A0A0G2JDI9;P55096	A0A0G2JDI9;P55096	1;1	1;1	1;1	ATP-binding cassette sub-family D member 3	Abcd3	tr|A0A0G2JDI9|A0A0G2JDI9_MOUSE ATP-binding cassette sub-family D member 3 OS=Mus musculus OX=10090 GN=Abcd3 PE=1 SV=1;sp|P55096|ABCD3_MOUSE ATP-binding cassette sub-family D member 3 OS=Mus musculus OX=10090 GN=Abcd3 PE=1 SV=2	2	1	1	1	1	1	1	0	1	1	1	1	1	0	1	1	1	1	1	0	1	1	2.4	2.4	2.4	62.697	549	549;659	0.0011723	6.2007	By MS/MS	By matching	By matching		By matching	By matching	2.4	2.4	2.4	0	2.4	2.4
A0A0G2JDL3;P49615	A0A0G2JDL3;P49615	2;2	1;1	1;1	Cyclin-dependent-like kinase 5	Cdk5	tr|A0A0G2JDL3|A0A0G2JDL3_MOUSE Cyclin-dependent-like kinase 5 OS=Mus musculus OX=10090 GN=Cdk5 PE=1 SV=1;sp|P49615|CDK5_MOUSE Cyclin-dependent-like kinase 5 OS=Mus musculus OX=10090 GN=Cdk5 PE=1 SV=1	2	2	1	1	2	2	2	0	1	1	1	1	1	0	0	0	1	1	1	0	0	0	7.3	4.2	4.2	29.528	260	260;292	0.0074153	5.919	By matching	By matching	By MS/MS		By matching	By matching	7.3	7.3	7.3	0	3.1	3.1
A0A0G2JFT4;A0A0G2JG35;A0A140T8T5;A0A0G2JDN7;E9PZ43;A0A0G2JFH2;P27546;A0A0G2JFK3;A0A0G2JDY5	A0A0G2JFT4;A0A0G2JG35;A0A140T8T5;A0A0G2JDN7;E9PZ43;A0A0G2JFH2;P27546;A0A0G2JFK3;A0A0G2JDY5	2;2;2;2;2;2;2;1;1	2;2;2;2;2;2;2;1;1	2;2;2;2;2;2;2;1;1	Microtubule-associated protein;Microtubule-associated protein 4	Map4	tr|A0A0G2JFT4|A0A0G2JFT4_MOUSE Microtubule-associated protein (Fragment) OS=Mus musculus OX=10090 GN=Map4 PE=1 SV=1;tr|A0A0G2JG35|A0A0G2JG35_MOUSE Microtubule-associated protein (Fragment) OS=Mus musculus OX=10090 GN=Map4 PE=1 SV=1;tr|A0A140T8T5|A0A140T8T5	9	2	2	2	1	1	2	0	1	1	1	1	2	0	1	1	1	1	2	0	1	1	9.4	9.4	9.4	27.872	276	276;290;414;902;933;1441;1125;207;220	0	11.531	By matching	By matching	By MS/MS		By matching	By matching	4	4	9.4	0	4	4
A0A0G2JDV8;Q9DAW9;A0A0G2JFI6;D3Z7R6;Q08093	A0A0G2JDV8;Q9DAW9;A0A0G2JFI6;D3Z7R6;Q08093	2;2;1;1;1	2;2;1;1;1	2;2;1;1;1	Calponin-3;Calponin;Calponin-2	Cnn3;Cnn2	tr|A0A0G2JDV8|A0A0G2JDV8_MOUSE Calponin OS=Mus musculus OX=10090 GN=Cnn3 PE=1 SV=1;sp|Q9DAW9|CNN3_MOUSE Calponin-3 OS=Mus musculus OX=10090 GN=Cnn3 PE=1 SV=1;tr|A0A0G2JFI6|A0A0G2JFI6_MOUSE Calponin-3 (Fragment) OS=Mus musculus OX=10090 GN=Cnn3 PE=1 SV=4;tr	5	2	2	2	2	1	1	1	1	2	2	1	1	1	1	2	2	1	1	1	1	2	8.5	8.5	8.5	31.395	284	284;330;139;266;305	0	13.068	By MS/MS	By matching	By MS/MS	By matching	By matching	By matching	8.5	3.9	4.6	4.6	4.6	8.5
A0A0G2JDW7;A0A0G2JG29;Q6ZWU9	A0A0G2JDW7;A0A0G2JG29;Q6ZWU9	2;2;2	2;2;2	2;2;2	40S ribosomal protein S27	Rps27	tr|A0A0G2JDW7|A0A0G2JDW7_MOUSE 40S ribosomal protein S27 (Fragment) OS=Mus musculus OX=10090 GN=Rps27 PE=1 SV=1;tr|A0A0G2JG29|A0A0G2JG29_MOUSE 40S ribosomal protein S27 OS=Mus musculus OX=10090 GN=Rps27 PE=1 SV=1;sp|Q6ZWU9|RS27_MOUSE 40S ribosomal protein	3	2	2	2	1	2	2	1	2	1	1	2	2	1	2	1	1	2	2	1	2	1	14.6	14.6	14.6	9.2327	82	82;83;84	0	43.784	By MS/MS	By MS/MS	By MS/MS	By matching	By matching	By matching	13.4	14.6	14.6	13.4	14.6	13.4
A0A0G2JDY4;Q8JZN5	A0A0G2JDY4;Q8JZN5	1;1	1;1	1;1	Acyl-CoA dehydrogenase family member 9, mitochondrial	Acad9	tr|A0A0G2JDY4|A0A0G2JDY4_MOUSE Acyl-CoA dehydrogenase family member 9, mitochondrial OS=Mus musculus OX=10090 GN=Acad9 PE=1 SV=1;sp|Q8JZN5|ACAD9_MOUSE Acyl-CoA dehydrogenase family member 9, mitochondrial OS=Mus musculus OX=10090 GN=Acad9 PE=1 SV=2	2	1	1	1	1	1	1	0	1	1	1	1	1	0	1	1	1	1	1	0	1	1	5.7	5.7	5.7	17.195	157	157;625	0	7.0685	By MS/MS	By MS/MS	By MS/MS		By matching	By matching	5.7	5.7	5.7	0	5.7	5.7
E9QKG6;A0A0G2JDZ9;E9Q804;Q99NH0;A0A1W2P6X1	E9QKG6;A0A0G2JDZ9;E9Q804;Q99NH0;A0A1W2P6X1	2;2;2;2;1	2;2;2;2;1	2;2;2;2;1	Ankyrin repeat domain-containing protein 17	Ankrd17	tr|E9QKG6|E9QKG6_MOUSE Ankyrin repeat domain-containing protein 17 OS=Mus musculus OX=10090 GN=Ankrd17 PE=1 SV=1;tr|A0A0G2JDZ9|A0A0G2JDZ9_MOUSE Ankyrin repeat domain-containing protein 17 OS=Mus musculus OX=10090 GN=Ankrd17 PE=1 SV=1;tr|E9Q804|E9Q804_MOUSE	5	2	2	2	0	2	0	0	0	0	0	2	0	0	0	0	0	2	0	0	0	0	1.5	1.5	1.5	246.62	2352	2352;2494;2602;2603;1600	0	14.244		By MS/MS					0	1.5	0	0	0	0
A0A0G2JER9;O54946;A0A087WP03;F6YRQ2;G3X8S5	A0A0G2JER9;O54946;A0A087WP03;F6YRQ2;G3X8S5	2;2;1;1;1	1;1;0;0;1	1;1;0;0;1	DnaJ homolog subfamily B member 6	Dnajb6;Dnajb2	tr|A0A0G2JER9|A0A0G2JER9_MOUSE DnaJ homolog subfamily B member 6 OS=Mus musculus OX=10090 GN=Dnajb6 PE=1 SV=1;sp|O54946|DNJB6_MOUSE DnaJ homolog subfamily B member 6 OS=Mus musculus OX=10090 GN=Dnajb6 PE=1 SV=4;tr|A0A087WP03|A0A087WP03_MOUSE DnaJ homolog s	5	2	1	1	2	2	2	1	1	2	1	1	1	0	0	1	1	1	1	0	0	1	9.5	5.3	5.3	26.998	243	243;365;110;231;261	0	9.6908	By matching	By MS/MS	By MS/MS	By matching	By matching	By matching	9.5	9.5	9.5	4.1	4.1	9.5
A0A0G2JES3;A0A140T8T4;P51410	A0A0G2JES3;A0A140T8T4;P51410	2;2;2	2;2;2	2;2;2	60S ribosomal protein L9	Rpl9	tr|A0A0G2JES3|A0A0G2JES3_MOUSE 60S ribosomal protein L9 (Fragment) OS=Mus musculus OX=10090 GN=Rpl9 PE=1 SV=1;tr|A0A140T8T4|A0A140T8T4_MOUSE Uncharacterized protein OS=Mus musculus OX=10090 GN=Rpl9-ps6 PE=4 SV=1;sp|P51410|RL9_MOUSE 60S ribosomal protein L9	3	2	2	2	1	2	1	1	1	2	1	2	1	1	1	2	1	2	1	1	1	2	26.2	26.2	26.2	21.622	191	191;192;192	0	24.595	By MS/MS	By MS/MS	By matching	By matching	By matching	By matching	20.4	26.2	20.4	20.4	20.4	26.2
A0A0G2JF72;Q8JZN2;Q91W50	A0A0G2JF72;Q8JZN2;Q91W50	1;1;1	1;1;1	1;1;1	Cold shock domain-containing protein E1	Csde1	tr|A0A0G2JF72|A0A0G2JF72_MOUSE Cold shock domain-containing protein E1 OS=Mus musculus OX=10090 GN=Csde1 PE=1 SV=1;tr|Q8JZN2|Q8JZN2_MOUSE Cold shock domain-containing protein E1 OS=Mus musculus OX=10090 GN=Csde1 PE=1 SV=1;sp|Q91W50|CSDE1_MOUSE Cold shock d	3	1	1	1	1	1	1	0	1	1	1	1	1	0	1	1	1	1	1	0	1	1	1.8	1.8	1.8	74.482	668	668;767;798	0	9.7493	By MS/MS	By matching	By MS/MS		By matching	By matching	1.8	1.8	1.8	0	1.8	1.8
A0A0G2JFT8;Q9D394	A0A0G2JFT8;Q9D394	1;1	1;1	1;1	Protein RUFY3	Rufy3	tr|A0A0G2JFT8|A0A0G2JFT8_MOUSE Protein RUFY3 OS=Mus musculus OX=10090 GN=Rufy3 PE=1 SV=1;sp|Q9D394|RUFY3_MOUSE Protein RUFY3 OS=Mus musculus OX=10090 GN=Rufy3 PE=1 SV=1	2	1	1	1	1	1	1	0	0	0	1	1	1	0	0	0	1	1	1	0	0	0	1.6	1.6	1.6	74.769	669	669;469	0.0073996	5.9176	By MS/MS	By MS/MS	By MS/MS				1.6	1.6	1.6	0	0	0
A0A0G2JFV9;Q9JHI7	A0A0G2JFV9;Q9JHI7	1;1	1;1	1;1	Exosome complex component RRP45	Exosc9	tr|A0A0G2JFV9|A0A0G2JFV9_MOUSE Exosome complex component RRP45 (Fragment) OS=Mus musculus OX=10090 GN=Exosc9 PE=1 SV=1;sp|Q9JHI7|EXOS9_MOUSE Exosome complex component RRP45 OS=Mus musculus OX=10090 GN=Exosc9 PE=1 SV=1	2	1	1	1	1	0	1	0	0	0	1	0	1	0	0	0	1	0	1	0	0	0	10.6	10.6	10.6	14.706	132	132;438	0	7.8916	By MS/MS		By MS/MS				10.6	0	10.6	0	0	0
A0A0G2JG88	A0A0G2JG88	1	1	1			tr|A0A0G2JG88|A0A0G2JG88_MOUSE T cell receptor alpha joining 48 (Fragment) OS=Mus musculus OX=10090 GN=Traj48 PE=4 SV=1	1	1	1	1	1	1	1	1	1	1	1	1	1	1	1	1	1	1	1	1	1	1	40	40	40	2.1234	20	20	0.0073145	5.9023	By MS/MS	By MS/MS	By matching	By matching	By matching	By matching	40	40	40	40	40	40
A0A0G2JG95;Q8BX10	A0A0G2JG95;Q8BX10	3;3	3;3	3;3	Serine/threonine-protein phosphatase PGAM5, mitochondrial	Pgam5	tr|A0A0G2JG95|A0A0G2JG95_MOUSE Serine/threonine-protein phosphatase PGAM5, mitochondrial (Fragment) OS=Mus musculus OX=10090 GN=Pgam5 PE=1 SV=1;sp|Q8BX10|PGAM5_MOUSE Serine/threonine-protein phosphatase PGAM5, mitochondrial OS=Mus musculus OX=10090 GN=Pgam	2	3	3	3	3	2	3	2	2	2	3	2	3	2	2	2	3	2	3	2	2	2	17.3	17.3	17.3	20.294	179	179;288	0	23.522	By MS/MS	By MS/MS	By MS/MS	By matching	By MS/MS	By MS/MS	17.3	10.6	17.3	10.6	10.6	10.6
A0A0J9YTQ7;D3Z780;Q61749	A0A0J9YTQ7;D3Z780;Q61749	1;1;1	1;1;1	1;1;1	Translation initiation factor eIF-2B subunit delta	Eif2b4	tr|A0A0J9YTQ7|A0A0J9YTQ7_MOUSE Translation initiation factor eIF-2B subunit delta (Fragment) OS=Mus musculus OX=10090 GN=Eif2b4 PE=1 SV=1;tr|D3Z780|D3Z780_MOUSE Translation initiation factor eIF-2B subunit delta OS=Mus musculus OX=10090 GN=Eif2b4 PE=1 SV=1	3	1	1	1	0	1	1	0	0	0	0	1	1	0	0	0	0	1	1	0	0	0	15	15	15	10.886	100	100;566;524	0	6.5399		By MS/MS	By MS/MS				0	15	15	0	0	0
Q91YV0;A0A0J9YTR9;A0A0J9YUG4;A0A0J9YTW1;A0A0J9YU37;A0A0J9YVG2;A0A0J9YUK1;A0A0J9YUP9;A0A0J9YUR0;A0A0J9YVB3;A0A0J9YU91;A0A0J9YU89;A0A0J9YV50;A0A0J9YUT3;A0A0J9YUX6;A0A0J9YUT7;A0A0J9YTU7;A0A0J9YVI1;A0A0J9YUZ0;E9Q8G4;Q60722	Q91YV0;A0A0J9YTR9;A0A0J9YUG4;A0A0J9YTW1;A0A0J9YU37;A0A0J9YVG2;A0A0J9YUK1;A0A0J9YUP9;A0A0J9YUR0;A0A0J9YVB3;A0A0J9YU91;A0A0J9YU89;A0A0J9YV50;A0A0J9YUT3;A0A0J9YUX6;A0A0J9YUT7;A0A0J9YTU7;A0A0J9YVI1;A0A0J9YUZ0;E9Q8G4;Q60722	2;2;2;2;2;2;2;2;1;1;1;1;1;1;1;1;1;1;1;1;1	2;2;2;2;2;2;2;2;1;1;1;1;1;1;1;1;1;1;1;1;1	2;2;2;2;2;2;2;2;1;1;1;1;1;1;1;1;1;1;1;1;1	Transcription factor 4	Tcf4	tr|Q91YV0|Q91YV0_MOUSE Tcf4 protein OS=Mus musculus OX=10090 GN=Tcf4 PE=1 SV=1;tr|A0A0J9YTR9|A0A0J9YTR9_MOUSE Transcription factor 4 OS=Mus musculus OX=10090 GN=Tcf4 PE=1 SV=1;tr|A0A0J9YUG4|A0A0J9YUG4_MOUSE Transcription factor 4 OS=Mus musculus OX=10090 G	21	2	2	2	2	2	2	0	1	1	2	2	2	0	1	1	2	2	2	0	1	1	6.3	6.3	6.3	54.104	507	507;507;537;587;606;641;641;642;121;167;172;198;220;224;271;320;541;610;646;692;670	0	11.529	By MS/MS	By MS/MS	By matching		By matching	By matching	6.3	6.3	6.3	0	3.2	3.2
G3UY41;G3UX09;A0A0J9YUJ4;A0A0J9YUX4;Q80X52;E9Q579;A0A0J9YTY6;E9PV90;E9PY45;E9Q6M6;Q9D6M3	G3UY41;G3UX09;A0A0J9YUJ4;A0A0J9YUX4;Q80X52;E9Q579;A0A0J9YTY6;E9PV90;E9PY45;E9Q6M6;Q9D6M3	1;1;1;1;1;1;1;1;1;1;1	1;1;1;1;1;1;1;1;1;1;1	1;1;1;1;1;1;1;1;1;1;1	Mitochondrial glutamate carrier 1	Slc25a22	tr|G3UY41|G3UY41_MOUSE Mitochondrial glutamate carrier 1 (Fragment) OS=Mus musculus OX=10090 GN=Slc25a22 PE=1 SV=1;tr|G3UX09|G3UX09_MOUSE Mitochondrial glutamate carrier 1 (Fragment) OS=Mus musculus OX=10090 GN=Slc25a22 PE=1 SV=1;tr|A0A0J9YUJ4|A0A0J9YUJ4_M	11	1	1	1	1	1	1	0	0	0	1	1	1	0	0	0	1	1	1	0	0	0	35.7	35.7	35.7	2.8274	28	28;38;72;85;98;103;196;206;222;229;323	0.0082389	5.8592	By MS/MS	By matching	By MS/MS				35.7	35.7	35.7	0	0	0
A0A0J9YUB6;Q9CRD0	A0A0J9YUB6;Q9CRD0	1;1	1;1	1;1	OCIA domain-containing protein 1	Ociad1	tr|A0A0J9YUB6|A0A0J9YUB6_MOUSE OCIA domain-containing protein 1 (Fragment) OS=Mus musculus OX=10090 GN=Ociad1 PE=1 SV=1;sp|Q9CRD0|OCAD1_MOUSE OCIA domain-containing protein 1 OS=Mus musculus OX=10090 GN=Ociad1 PE=1 SV=1	2	1	1	1	1	0	1	1	1	1	1	0	1	1	1	1	1	0	1	1	1	1	4.5	4.5	4.5	19.622	178	178;247	0.0073069	5.8986	By MS/MS		By MS/MS	By matching	By MS/MS	By MS/MS	4.5	0	4.5	4.5	4.5	4.5
B9EJ54;A0A0J9YUD5;E9Q880	B9EJ54;A0A0J9YUD5;E9Q880	2;2;1	2;2;1	2;2;1		Nup205	tr|B9EJ54|B9EJ54_MOUSE MCG21756, isoform CRA_b OS=Mus musculus OX=10090 GN=Nup205 PE=1 SV=1;tr|A0A0J9YUD5|A0A0J9YUD5_MOUSE Nucleoporin 205 OS=Mus musculus OX=10090 GN=Nup205 PE=1 SV=1;tr|E9Q880|E9Q880_MOUSE Nucleoporin 205 OS=Mus musculus OX=10090 GN=Nup20	3	2	2	2	1	1	2	0	0	1	1	1	2	0	0	1	1	1	2	0	0	1	1.3	1.3	1.3	227.46	2008	2008;2061;322	0	12.101	By MS/MS	By MS/MS	By MS/MS			By matching	0.7	0.7	1.3	0	0	0.7
D3YY96;A0A0J9YUJ3;D3Z2L1;Q3UU56;D3Z7I0;Q8BL74	D3YY96;A0A0J9YUJ3;D3Z2L1;Q3UU56;D3Z7I0;Q8BL74	1;1;1;1;1;1	1;1;1;1;1;1	1;1;1;1;1;1	General transcription factor 3C polypeptide 2	Gtf3c2;Gm29609	tr|D3YY96|D3YY96_MOUSE General transcription factor 3C polypeptide 2 (Fragment) OS=Mus musculus OX=10090 GN=Gtf3c2 PE=4 SV=1;tr|A0A0J9YUJ3|A0A0J9YUJ3_MOUSE General transcription factor 3C polypeptide 2 (Fragment) OS=Mus musculus OX=10090 GN=Gtf3c2 PE=4 SV=	6	1	1	1	1	1	1	0	0	0	1	1	1	0	0	0	1	1	1	0	0	0	8.8	8.8	8.8	14.427	136	136;175;228;907;950;907	0	10.817	By MS/MS	By MS/MS	By MS/MS				8.8	8.8	8.8	0	0	0
E9Q8Q1;A0A0J9YV56;E9Q0U3;D3Z7P0;Q8K3W0	E9Q8Q1;A0A0J9YV56;E9Q0U3;D3Z7P0;Q8K3W0	1;1;1;1;1	1;1;1;1;1	1;1;1;1;1	BRCA1-A complex subunit BRE	Bre	tr|E9Q8Q1|E9Q8Q1_MOUSE BRISC and BRCA1-A complex member 2 OS=Mus musculus OX=10090 GN=Babam2 PE=1 SV=1;tr|A0A0J9YV56|A0A0J9YV56_MOUSE BRISC and BRCA1-A complex member 2 (Fragment) OS=Mus musculus OX=10090 GN=Babam2 PE=1 SV=1;tr|E9Q0U3|E9Q0U3_MOUSE BRISC an	5	1	1	1	0	1	1	0	0	0	0	1	1	0	0	0	0	1	1	0	0	0	20.9	20.9	20.9	4.6024	43	43;63;205;385;383	0	6.2887		By matching	By MS/MS				0	20.9	20.9	0	0	0
A0A0J9YVG0;Q61074	A0A0J9YVG0;Q61074	2;2	2;2	2;2	Protein phosphatase 1G	Ppm1g	tr|A0A0J9YVG0|A0A0J9YVG0_MOUSE Protein phosphatase 1G OS=Mus musculus OX=10090 GN=Ppm1g PE=1 SV=1;sp|Q61074|PPM1G_MOUSE Protein phosphatase 1G OS=Mus musculus OX=10090 GN=Ppm1g PE=1 SV=3	2	2	2	2	2	2	2	2	1	2	2	2	2	2	1	2	2	2	2	2	1	2	4.6	4.6	4.6	47.802	435	435;542	0	13.261	By MS/MS	By MS/MS	By MS/MS	By matching	By matching	By matching	4.6	4.6	4.6	4.6	2.5	4.6
A0A0N4SUQ1;A0A0N4SUN8;A0A0N4SWH2;A0A0N4SV32;Q3UMP4;Q9CY58;A0A0N4SVK5;A0A0N4SV40	A0A0N4SUQ1;A0A0N4SUN8;A0A0N4SWH2;A0A0N4SV32;Q3UMP4;Q9CY58	3;3;3;3;3;3;1;1	3;3;3;3;3;3;1;1	3;3;3;3;3;3;1;1	Plasminogen activator inhibitor 1 RNA-binding protein	Serbp1	tr|A0A0N4SUQ1|A0A0N4SUQ1_MOUSE Plasminogen activator inhibitor 1 RNA-binding protein OS=Mus musculus OX=10090 GN=Serbp1 PE=1 SV=1;tr|A0A0N4SUN8|A0A0N4SUN8_MOUSE Plasminogen activator inhibitor 1 RNA-binding protein OS=Mus musculus OX=10090 GN=Serbp1 PE=1 S	8	3	3	3	3	3	3	3	3	3	3	3	3	3	3	3	3	3	3	3	3	3	27.2	27.2	27.2	16.078	147	147;155;211;362;401;407;75;186	0	163.99	By MS/MS	By MS/MS	By MS/MS	By MS/MS	By MS/MS	By MS/MS	27.2	27.2	27.2	27.2	27.2	27.2
A0A0N4SUW1;D3Z2H3;Q3TPM3;Q9WTX6	A0A0N4SUW1;D3Z2H3;Q3TPM3;Q9WTX6	1;1;1;1	1;1;1;1	1;1;1;1	Cullin-1	Cul1	tr|A0A0N4SUW1|A0A0N4SUW1_MOUSE Cullin-1 OS=Mus musculus OX=10090 GN=Cul1 PE=1 SV=1;tr|D3Z2H3|D3Z2H3_MOUSE Cullin-1 (Fragment) OS=Mus musculus OX=10090 GN=Cul1 PE=1 SV=1;tr|Q3TPM3|Q3TPM3_MOUSE Cullin-1 (Fragment) OS=Mus musculus OX=10090 GN=Cul1 PE=1 SV=1;s	4	1	1	1	1	1	1	0	0	0	1	1	1	0	0	0	1	1	1	0	0	0	17.6	17.6	17.6	5.9607	51	51;110;699;776	0	6.9987	By MS/MS	By matching	By MS/MS				17.6	17.6	17.6	0	0	0
A0A0N4SV00;P80313	A0A0N4SV00;P80313	5;5	5;5	5;5	T-complex protein 1 subunit eta	Cct7	tr|A0A0N4SV00|A0A0N4SV00_MOUSE T-complex protein 1 subunit eta OS=Mus musculus OX=10090 GN=Cct7 PE=1 SV=1;sp|P80313|TCPH_MOUSE T-complex protein 1 subunit eta OS=Mus musculus OX=10090 GN=Cct7 PE=1 SV=1	2	5	5	5	5	5	4	2	5	5	5	5	4	2	5	5	5	5	4	2	5	5	9.2	9.2	9.2	55.057	502	502;544	0	34.024	By MS/MS	By MS/MS	By MS/MS	By MS/MS	By MS/MS	By MS/MS	9.2	9.2	6.8	4.4	9.2	9.2
A0A0N4SV66;C0HKE9;C0HKE8;C0HKE7;C0HKE6;C0HKE5;C0HKE4;C0HKE3;C0HKE2;C0HKE1;Q8CGP6;Q8R1M2;Q8CGP7;Q8CGP5;Q8BFU2;P27661;Q8CGP4;Q3THW5;P0C0S6;G3UWL7;Q8R029;Q3UA95	A0A0N4SV66;C0HKE9;C0HKE8;C0HKE7;C0HKE6;C0HKE5;C0HKE4;C0HKE3;C0HKE2;C0HKE1;Q8CGP6;Q8R1M2;Q8CGP7;Q8CGP5;Q8BFU2;P27661;Q8CGP4;Q3THW5;P0C0S6	4;4;4;4;4;4;4;4;4;4;4;4;4;4;4;4;3;2;2;1;1;1	1;1;1;1;1;1;1;1;1;1;1;1;1;1;1;1;0;0;0;0;0;0	1;1;1;1;1;1;1;1;1;1;1;1;1;1;1;1;0;0;0;0;0;0	Histone H2A type 1-H;Histone H2A.J;Histone H2A type 1-K;Histone H2A type 1-F;Histone H2A type 3;Histone H2AX;Histone H2A;Histone H2A.V;Histone H2A.Z	Hist1h2ah;H2afj;Hist1h2ak;Hist1h2af;Hist3h2a;H2afx;Hist1h2aa;H2afv;H2afz	tr|A0A0N4SV66|A0A0N4SV66_MOUSE Histone H2A OS=Mus musculus OX=10090 GN=H2afj PE=1 SV=1;sp|C0HKE9|H2A1P_MOUSE Histone H2A type 1-P OS=Mus musculus OX=10090 GN=Hist1h2ap PE=1 SV=1;sp|C0HKE8|H2A1O_MOUSE Histone H2A type 1-O OS=Mus musculus OX=10090 GN=Hist1h2	22	4	1	1	4	3	4	3	4	4	1	1	1	1	1	1	1	1	1	1	1	1	41.3	23	23	13.66	126	126;130;130;130;130;130;130;130;130;130;128;129;130;130;130;143;129;128;128;87;90;105	0	50.087	By MS/MS	By MS/MS	By MS/MS	By MS/MS	By MS/MS	By MS/MS	41.3	35.7	41.3	35.7	41.3	41.3
A0A0N4SVB8;Q9CQW2	A0A0N4SVB8;Q9CQW2	1;1	1;1	1;1	ADP-ribosylation factor-like protein 8B	Arl8b	tr|A0A0N4SVB8|A0A0N4SVB8_MOUSE ADP-ribosylation factor-like protein 8B OS=Mus musculus OX=10090 GN=Arl8b PE=1 SV=1;sp|Q9CQW2|ARL8B_MOUSE ADP-ribosylation factor-like protein 8B OS=Mus musculus OX=10090 GN=Arl8b PE=1 SV=1	2	1	1	1	1	1	1	0	0	0	1	1	1	0	0	0	1	1	1	0	0	0	6.5	6.5	6.5	15.985	138	138;186	0	6.3752	By MS/MS	By MS/MS	By MS/MS				6.5	6.5	6.5	0	0	0
A0A0N4SVH4;Q61599	A0A0N4SVH4;Q61599	1;1	1;1	1;1	Rho GDP-dissociation inhibitor 2	Arhgdib	tr|A0A0N4SVH4|A0A0N4SVH4_MOUSE Rho GDP-dissociation inhibitor 2 (Fragment) OS=Mus musculus OX=10090 GN=Arhgdib PE=1 SV=1;sp|Q61599|GDIR2_MOUSE Rho GDP-dissociation inhibitor 2 OS=Mus musculus OX=10090 GN=Arhgdib PE=1 SV=3	2	1	1	1	1	0	0	0	0	0	1	0	0	0	0	0	1	0	0	0	0	0	7.9	7.9	7.9	10.22	89	89;200	0.0073918	5.9155	By MS/MS						7.9	0	0	0	0	0
A0A0N4SVQ1;Q62425	A0A0N4SVQ1;Q62425	1;1	1;1	1;1	Cytochrome c oxidase subunit NDUFA4	Ndufa4	tr|A0A0N4SVQ1|A0A0N4SVQ1_MOUSE Cytochrome c oxidase subunit NDUFA4 OS=Mus musculus OX=10090 GN=Ndufa4 PE=1 SV=1;sp|Q62425|NDUA4_MOUSE Cytochrome c oxidase subunit NDUFA4 OS=Mus musculus OX=10090 GN=Ndufa4 PE=1 SV=2	2	1	1	1	1	1	1	1	0	0	1	1	1	1	0	0	1	1	1	1	0	0	20.4	20.4	20.4	5.8765	49	49;82	0	7.9465	By MS/MS	By MS/MS	By MS/MS	By matching			20.4	20.4	20.4	20.4	0	0
A0A0N5E9G7;G3X8Z6;Q5U4B1;G3UWX1;P35601	A0A0N5E9G7;G3X8Z6;Q5U4B1;G3UWX1;P35601	7;7;7;7;7	7;7;7;7;7	7;7;7;7;7	Replication factor C subunit 1	Rfc1	tr|A0A0N5E9G7|A0A0N5E9G7_MOUSE Replication factor C subunit 1 OS=Mus musculus OX=10090 GN=Rfc1 PE=1 SV=1;tr|G3X8Z6|G3X8Z6_MOUSE Replication factor C subunit 1 OS=Mus musculus OX=10090 GN=Rfc1 PE=1 SV=1;tr|Q5U4B1|Q5U4B1_MOUSE Replication factor C subunit 1	5	7	7	7	6	5	7	3	6	6	6	5	7	3	6	6	6	5	7	3	6	6	6.6	6.6	6.6	125.86	1130	1130;1131;1132;1145;1131	0	44.507	By MS/MS	By MS/MS	By MS/MS	By matching	By matching	By MS/MS	5.9	4.7	6.6	2.7	5.4	5.4
Q8BQ10;D3YYI8;A0A0R4J008;O09106;P70288	Q8BQ10;D3YYI8;A0A0R4J008;O09106;P70288	1;1;1;1;1	1;1;1;1;1	1;1;1;1;1	Histone deacetylase;Histone deacetylase 1;Histone deacetylase 2	Hdac2;Gm10093;Hdac1	tr|Q8BQ10|Q8BQ10_MOUSE Histone deacetylase 2 OS=Mus musculus OX=10090 GN=Hdac2 PE=1 SV=1;tr|D3YYI8|D3YYI8_MOUSE Histone deacetylase OS=Mus musculus OX=10090 GN=Gm10093 PE=3 SV=1;tr|A0A0R4J008|A0A0R4J008_MOUSE Histone deacetylase OS=Mus musculus OX=10090 GN	5	1	1	1	0	1	1	0	1	0	0	1	1	0	1	0	0	1	1	0	1	0	3.9	3.9	3.9	34.69	304	304;482;488;482;488	0	6.805		By MS/MS	By MS/MS		By matching		0	3.9	3.9	0	3.9	0
A0A0R4J047;Q9CYI4;D3Z765	A0A0R4J047;Q9CYI4;D3Z765	3;3;2	1;1;1	1;1;1	Putative RNA-binding protein Luc7-like 1	Luc7l	tr|A0A0R4J047|A0A0R4J047_MOUSE Luc7 homolog (S. cerevisiae)-like, isoform CRA_c OS=Mus musculus OX=10090 GN=Luc7l PE=1 SV=1;sp|Q9CYI4|LUC7L_MOUSE Putative RNA-binding protein Luc7-like 1 OS=Mus musculus OX=10090 GN=Luc7l PE=1 SV=2;tr|D3Z765|D3Z765_MOUSE Pu	3	3	1	1	3	3	2	3	3	3	1	1	1	1	1	1	1	1	1	1	1	1	10.2	4.6	4.6	38.465	325	325;371;172	0	7.4265	By MS/MS	By MS/MS	By MS/MS	By matching	By MS/MS	By matching	10.2	10.2	7.7	10.2	10.2	10.2
A0A2I3BRG2;S4R295;A0A0R4J049;Q8CIG8	A0A2I3BRG2;S4R295;A0A0R4J049;Q8CIG8	1;1;1;1	1;1;1;1	1;1;1;1	Protein arginine N-methyltransferase 5	Prmt5	tr|A0A2I3BRG2|A0A2I3BRG2_MOUSE Protein arginine N-methyltransferase 5 OS=Mus musculus OX=10090 GN=Prmt5 PE=1 SV=1;tr|S4R295|S4R295_MOUSE Protein arginine N-methyltransferase 5 OS=Mus musculus OX=10090 GN=Prmt5 PE=1 SV=1;tr|A0A0R4J049|A0A0R4J049_MOUSE Prote	4	1	1	1	1	1	1	1	0	0	1	1	1	1	0	0	1	1	1	1	0	0	32.4	32.4	32.4	3.518	37	37;63;637;637	0	9.4456	By MS/MS	By MS/MS	By MS/MS	By matching			32.4	32.4	32.4	32.4	0	0
A0A0R4J079;Q8BMP6	A0A0R4J079;Q8BMP6	3;3	3;3	3;3	Golgi resident protein GCP60	Acbd3	tr|A0A0R4J079|A0A0R4J079_MOUSE Acyl-Coenzyme A binding domain containing 3, isoform CRA_b OS=Mus musculus OX=10090 GN=Acbd3 PE=1 SV=1;sp|Q8BMP6|GCP60_MOUSE Golgi resident protein GCP60 OS=Mus musculus OX=10090 GN=Acbd3 PE=1 SV=3	2	3	3	3	2	3	3	1	3	3	2	3	3	1	3	3	2	3	3	1	3	3	9.1	9.1	9.1	60.181	525	525;525	0	37.202	By MS/MS	By MS/MS	By MS/MS	By matching	By matching	By MS/MS	6.1	9.1	9.1	3.2	9.1	9.1
A0A2I3BQC6;A0A2I3BRX1;A0A2I3BQL9;A0A2I3BS39;A0A0R4J0G0;Q8BH04	A0A2I3BQC6;A0A2I3BRX1;A0A2I3BQL9;A0A2I3BS39;A0A0R4J0G0;Q8BH04	1;1;1;1;1;1	1;1;1;1;1;1	1;1;1;1;1;1	Phosphoenolpyruvate carboxykinase [GTP], mitochondrial	Pck2	tr|A0A2I3BQC6|A0A2I3BQC6_MOUSE Phosphoenolpyruvate carboxykinase [GTP], mitochondrial (Fragment) OS=Mus musculus OX=10090 GN=Pck2 PE=1 SV=1;tr|A0A2I3BRX1|A0A2I3BRX1_MOUSE Phosphoenolpyruvate carboxykinase [GTP], mitochondrial (Fragment) OS=Mus musculus OX=	6	1	1	1	1	1	1	0	0	0	1	1	1	0	0	0	1	1	1	0	0	0	6.9	6.9	6.9	16.939	160	160;489;599;609;667;640	0.0073529	5.9054	By matching	By MS/MS	By MS/MS				6.9	6.9	6.9	0	0	0
A0A0R4J0G4;Q6VN19	A0A0R4J0G4;Q6VN19	1;1	1;1	1;1	Ran-binding protein 10	Ranbp10	tr|A0A0R4J0G4|A0A0R4J0G4_MOUSE Ran-binding protein 10 OS=Mus musculus OX=10090 GN=Ranbp10 PE=1 SV=1;sp|Q6VN19|RBP10_MOUSE Ran-binding protein 10 OS=Mus musculus OX=10090 GN=Ranbp10 PE=1 SV=2	2	1	1	1	0	0	1	0	1	0	0	0	1	0	1	0	0	0	1	0	1	0	1.5	1.5	1.5	70.087	648	648;620	0.0033708	6.0694			By MS/MS		By matching		0	0	1.5	0	1.5	0
A0A0R4J0H0;A0A0R4J1G7;F8WJ93;Q3UMY5	A0A0R4J0H0;A0A0R4J1G7;F8WJ93;Q3UMY5	1;1;1;1	1;1;1;1	1;1;1;1	Echinoderm microtubule-associated protein-like 4	Eml4	tr|A0A0R4J0H0|A0A0R4J0H0_MOUSE Echinoderm microtubule-associated protein-like 4 OS=Mus musculus OX=10090 GN=Eml4 PE=1 SV=1;tr|A0A0R4J1G7|A0A0R4J1G7_MOUSE Echinoderm microtubule-associated protein-like 4 OS=Mus musculus OX=10090 GN=Eml4 PE=1 SV=1;tr|F8WJ93|	4	1	1	1	1	1	1	0	0	0	1	1	1	0	0	0	1	1	1	0	0	0	1.4	1.4	1.4	97.507	876	876;919;988;988	0.0033632	6.0644	By matching	By matching	By MS/MS				1.4	1.4	1.4	0	0	0
A0A0R4J0H8;Q6NWW9	A0A0R4J0H8;Q6NWW9	1;1	1;1	1;1	Fibronectin type III domain-containing protein 3B	Fndc3b	tr|A0A0R4J0H8|A0A0R4J0H8_MOUSE Fibronectin type III domain-containing protein 3B OS=Mus musculus OX=10090 GN=Fndc3b PE=1 SV=1;sp|Q6NWW9|FND3B_MOUSE Fibronectin type III domain-containing protein 3B OS=Mus musculus OX=10090 GN=Fndc3b PE=1 SV=1	2	1	1	1	1	0	1	0	0	0	1	0	1	0	0	0	1	0	1	0	0	0	1.2	1.2	1.2	132.77	1207	1207;1207	0.0082902	5.8745	By matching		By MS/MS				1.2	0	1.2	0	0	0
A0A0R4J0I0;P70459	A0A0R4J0I0;P70459	1;1	1;1	1;1	ETS domain-containing transcription factor ERF	Erf	tr|A0A0R4J0I0|A0A0R4J0I0_MOUSE ETS domain-containing transcription factor ERF OS=Mus musculus OX=10090 GN=Erf PE=1 SV=1;sp|P70459|ERF_MOUSE ETS domain-containing transcription factor ERF OS=Mus musculus OX=10090 GN=Erf PE=1 SV=1	2	1	1	1	1	1	1	0	0	0	1	1	1	0	0	0	1	1	1	0	0	0	2.7	2.7	2.7	59.066	551	551;551	0	7.4995	By MS/MS	By MS/MS	By MS/MS				2.7	2.7	2.7	0	0	0
E9PVJ3;E9Q2M3;A0A0R4J0I4;Q8BIW9	E9PVJ3;E9Q2M3;A0A0R4J0I4;Q8BIW9	1;1;1;1	1;1;1;1	1;1;1;1	Chromosome transmission fidelity protein 18 homolog	Chtf18	tr|E9PVJ3|E9PVJ3_MOUSE Chromosome transmission fidelity protein 18 homolog (Fragment) OS=Mus musculus OX=10090 GN=Chtf18 PE=1 SV=1;tr|E9Q2M3|E9Q2M3_MOUSE Chromosome transmission fidelity protein 18 homolog OS=Mus musculus OX=10090 GN=Chtf18 PE=1 SV=1;tr|A0	4	1	1	1	1	1	1	0	0	0	1	1	1	0	0	0	1	1	1	0	0	0	4.1	4.1	4.1	29.392	267	267;365;969;969	0	7.2363	By MS/MS	By MS/MS	By MS/MS				4.1	4.1	4.1	0	0	0
A0A0R4J0N9;A0A0R4J147;A0A0R4J1L9;Q5HZI1	A0A0R4J0N9;A0A0R4J147;A0A0R4J1L9;Q5HZI1	1;1;1;1	1;1;1;1	1;1;1;1	Microtubule-associated tumor suppressor 1 homolog	Mtus1	tr|A0A0R4J0N9|A0A0R4J0N9_MOUSE Microtubule-associated tumor suppressor 1 homolog OS=Mus musculus OX=10090 GN=Mtus1 PE=1 SV=1;tr|A0A0R4J147|A0A0R4J147_MOUSE Microtubule-associated tumor suppressor 1 homolog OS=Mus musculus OX=10090 GN=Mtus1 PE=1 SV=1;tr|A0A	4	1	1	1	1	1	1	1	1	1	1	1	1	1	1	1	1	1	1	1	1	1	2.5	2.5	2.5	50.767	440	440;520;1210;1210	0.0053648	5.9551	By matching	By matching	By MS/MS	By matching	By matching	By matching	2.5	2.5	2.5	2.5	2.5	2.5
A0A0R4J0V5;P08775	A0A0R4J0V5;P08775	5;5	5;5	5;5	DNA-directed RNA polymerase II subunit RPB1	Polr2a	tr|A0A0R4J0V5|A0A0R4J0V5_MOUSE DNA-directed RNA polymerase subunit OS=Mus musculus OX=10090 GN=Polr2a PE=1 SV=1;sp|P08775|RPB1_MOUSE DNA-directed RNA polymerase II subunit RPB1 OS=Mus musculus OX=10090 GN=Polr2a PE=1 SV=3	2	5	5	5	4	5	5	0	0	2	4	5	5	0	0	2	4	5	5	0	0	2	4.8	4.8	4.8	213.48	1932	1932;1970	0	34.764	By MS/MS	By MS/MS	By MS/MS			By matching	3.7	4.8	4.8	0	0	2.2
D3YW02;A0A0R4J0Z0;Q3U6U5	D3YW02;A0A0R4J0Z0;Q3U6U5	1;1;1	1;1;1	1;1;1	Putative GTP-binding protein 6	Gtpbp6	tr|D3YW02|D3YW02_MOUSE Putative GTP-binding protein 6 (Fragment) OS=Mus musculus OX=10090 GN=Gtpbp6 PE=1 SV=1;tr|A0A0R4J0Z0|A0A0R4J0Z0_MOUSE Putative GTP-binding protein 6 OS=Mus musculus OX=10090 GN=Gtpbp6 PE=1 SV=1;sp|Q3U6U5|GTPB6_MOUSE Putative GTP-bind	3	1	1	1	0	0	1	0	0	0	0	0	1	0	0	0	0	0	1	0	0	0	5.9	5.9	5.9	25.193	221	221;514;514	0	6.3908			By MS/MS				0	0	5.9	0	0	0
A0A0R4J124;O54781	A0A0R4J124;O54781	1;1	1;1	1;1	SRSF protein kinase 2;SRSF protein kinase 2 N-terminal;SRSF protein kinase 2 C-terminal	Srpk2	tr|A0A0R4J124|A0A0R4J124_MOUSE SRSF protein kinase 2 OS=Mus musculus OX=10090 GN=Srpk2 PE=1 SV=1;sp|O54781|SRPK2_MOUSE SRSF protein kinase 2 OS=Mus musculus OX=10090 GN=Srpk2 PE=1 SV=2	2	1	1	1	1	1	1	1	1	1	1	1	1	1	1	1	1	1	1	1	1	1	1.8	1.8	1.8	76.884	682	682;681	0	6.5448	By MS/MS	By MS/MS	By matching	By matching	By matching	By matching	1.8	1.8	1.8	1.8	1.8	1.8
G3UX35;A0A0R4J170;Q3TKT4	G3UX35;A0A0R4J170;Q3TKT4	4;4;4	4;4;4	4;4;4	Transcription activator BRG1	Smarca4	tr|G3UX35|G3UX35_MOUSE Transcription activator BRG1 (Fragment) OS=Mus musculus OX=10090 GN=Smarca4 PE=1 SV=1;tr|A0A0R4J170|A0A0R4J170_MOUSE Transcription activator BRG1 OS=Mus musculus OX=10090 GN=Smarca4 PE=1 SV=1;sp|Q3TKT4|SMCA4_MOUSE Transcription activ	3	4	4	4	3	4	4	0	2	3	3	4	4	0	2	3	3	4	4	0	2	3	3.5	3.5	3.5	143.51	1267	1267;1617;1613	0	32.204	By matching	By MS/MS	By MS/MS		By matching	By MS/MS	2.8	3.5	3.5	0	2	2.8
A0A0R4J174;Q9QZH6	A0A0R4J174;Q9QZH6	1;1	1;1	1;1	Evolutionarily conserved signaling intermediate in Toll pathway, mitochondrial	Ecsit	tr|A0A0R4J174|A0A0R4J174_MOUSE Evolutionarily conserved-signaling intermediate in Toll pathway, mitochondrial OS=Mus musculus OX=10090 GN=Ecsit PE=1 SV=1;sp|Q9QZH6|ECSIT_MOUSE Evolutionarily conserved signaling intermediate in Toll pathway, mitochondrial O	2	1	1	1	1	1	1	0	0	1	1	1	1	0	0	1	1	1	1	0	0	1	2.3	2.3	2.3	49.772	435	435;435	0	6.7495	By matching	By MS/MS	By MS/MS			By matching	2.3	2.3	2.3	0	0	2.3
A0A0R4J1E3;Q9QXS6;F7CPL2	A0A0R4J1E3;Q9QXS6;F7CPL2	2;2;1	2;2;1	2;2;1	Drebrin	Dbn1	tr|A0A0R4J1E3|A0A0R4J1E3_MOUSE Drebrin OS=Mus musculus OX=10090 GN=Dbn1 PE=1 SV=1;sp|Q9QXS6|DREB_MOUSE Drebrin OS=Mus musculus OX=10090 GN=Dbn1 PE=1 SV=4;tr|F7CPL2|F7CPL2_MOUSE Drebrin (Fragment) OS=Mus musculus OX=10090 GN=Dbn1 PE=1 SV=1	3	2	2	2	2	2	2	1	1	1	2	2	2	1	1	1	2	2	2	1	1	1	3.9	3.9	3.9	72.544	661	661;706;169	0	18.047	By MS/MS	By MS/MS	By MS/MS	By matching	By MS/MS	By MS/MS	3.9	3.9	3.9	2.4	2.4	2.4
A0A0R4J1H6;E9QP99;P55937	A0A0R4J1H6;E9QP99;P55937	1;1;1	1;1;1	1;1;1	Golgin subfamily A member 3	Golga3	tr|A0A0R4J1H6|A0A0R4J1H6_MOUSE Golgin subfamily A member 3 OS=Mus musculus OX=10090 GN=Golga3 PE=1 SV=1;tr|E9QP99|E9QP99_MOUSE Golgin subfamily A member 3 OS=Mus musculus OX=10090 GN=Golga3 PE=1 SV=1;sp|P55937|GOGA3_MOUSE Golgin subfamily A member 3 OS=Mus	3	1	1	1	1	1	1	0	0	0	1	1	1	0	0	0	1	1	1	0	0	0	0.8	0.8	0.8	162.89	1447	1447;1487;1487	0.0054171	5.9857	By MS/MS	By matching	By MS/MS				0.8	0.8	0.8	0	0	0
F6XGN0;A0A0R4J1I6;Q9QY81	F6XGN0;A0A0R4J1I6;Q9QY81	1;1;1	1;1;1	1;1;1	Nuclear pore membrane glycoprotein 210	Nup210	tr|F6XGN0|F6XGN0_MOUSE Nuclear pore membrane glycoprotein 210 (Fragment) OS=Mus musculus OX=10090 GN=Nup210 PE=1 SV=2;tr|A0A0R4J1I6|A0A0R4J1I6_MOUSE Nuclear pore membrane glycoprotein 210 OS=Mus musculus OX=10090 GN=Nup210 PE=1 SV=1;sp|Q9QY81|PO210_MOUSE N	3	1	1	1	1	1	1	1	1	1	1	1	1	1	1	1	1	1	1	1	1	1	0.8	0.8	0.8	116.02	1076	1076;1842;1886	0.0091743	5.8405	By MS/MS	By MS/MS	By MS/MS	By matching	By matching	By matching	0.8	0.8	0.8	0.8	0.8	0.8
A0A0R4J1J1	A0A0R4J1J1	2	2	2			tr|A0A0R4J1J1|A0A0R4J1J1_MOUSE MCG114807, isoform CRA_c OS=Mus musculus OX=10090 GN=Pnkd PE=1 SV=1	1	2	2	2	2	2	2	0	0	0	2	2	2	0	0	0	2	2	2	0	0	0	19.7	19.7	19.7	15.57	142	142	0	39.001	By MS/MS	By MS/MS	By MS/MS				19.7	19.7	19.7	0	0	0
A0A0R4J1L6;Q5DTU0	A0A0R4J1L6;Q5DTU0	1;1	1;1	1;1	Actin filament-associated protein 1-like 2	Afap1l2	tr|A0A0R4J1L6|A0A0R4J1L6_MOUSE Actin filament-associated protein 1-like 2 OS=Mus musculus OX=10090 GN=Afap1l2 PE=1 SV=1;sp|Q5DTU0|AF1L2_MOUSE Actin filament-associated protein 1-like 2 OS=Mus musculus OX=10090 GN=Afap1l2 PE=1 SV=2	2	1	1	1	0	0	1	0	0	0	0	0	1	0	0	0	0	0	1	0	0	0	0.9	0.9	0.9	85.716	769	769;825	0	6.4254			By MS/MS				0	0	0.9	0	0	0
A0A0R4J1N8;Q8CEE7;D3YVJ8	A0A0R4J1N8;Q8CEE7;D3YVJ8	4;4;2	4;4;2	4;4;2	Retinol dehydrogenase 13	Rdh13	tr|A0A0R4J1N8|A0A0R4J1N8_MOUSE Retinol dehydrogenase 13 OS=Mus musculus OX=10090 GN=Rdh13 PE=1 SV=1;sp|Q8CEE7|RDH13_MOUSE Retinol dehydrogenase 13 OS=Mus musculus OX=10090 GN=Rdh13 PE=1 SV=1;tr|D3YVJ8|D3YVJ8_MOUSE Retinol dehydrogenase 13 (Fragment) OS=Mus	3	4	4	4	4	4	4	1	1	1	4	4	4	1	1	1	4	4	4	1	1	1	11.7	11.7	11.7	32.367	299	299;334;115	0	32.462	By MS/MS	By MS/MS	By MS/MS	By matching	By matching	By matching	11.7	11.7	11.7	2.3	4.3	4.3
Q4JJC0;E9PYJ2;A0A0R4J1Y4;F6UGU7;E0CX45;F6TSJ9;E0CXR8;E0CZE2;E0CZ83;E0CY24;E0CXL4;B7ZNY3;F6S7Z1;G3XA13;A5D6P2;Q99NH2	Q4JJC0;E9PYJ2;A0A0R4J1Y4;F6UGU7;E0CX45;F6TSJ9;E0CXR8;E0CZE2;E0CZ83;E0CY24;E0CXL4;B7ZNY3;F6S7Z1;G3XA13;A5D6P2;Q99NH2	2;2;2;2;2;2;2;2;2;2;2;2;2;2;2;2	2;2;2;2;2;2;2;2;2;2;2;2;2;2;2;2	2;2;2;2;2;2;2;2;2;2;2;2;2;2;2;2	Partitioning defective 3 homolog	Pard3	tr|Q4JJC0|Q4JJC0_MOUSE PAR3 splice variant (Fragment) OS=Mus musculus OX=10090 GN=Pard3 PE=1 SV=1;tr|E9PYJ2|E9PYJ2_MOUSE Partitioning defective 3 homolog OS=Mus musculus OX=10090 GN=Pard3 PE=1 SV=1;tr|A0A0R4J1Y4|A0A0R4J1Y4_MOUSE Partitioning defective 3 ho	16	2	2	2	2	2	1	0	0	0	2	2	1	0	0	0	2	2	1	0	0	0	5.9	5.9	5.9	46.115	422	422;741;896;919;943;984;990;1024;1094;1247;1289;1319;1324;1333;1334;1333	0	12.48	By matching	By MS/MS	By MS/MS				5.9	5.9	2.8	0	0	0
A0A0R4J260;B2RRE7	A0A0R4J260;B2RRE7	1;1	1;1	1;1	OTU domain-containing protein 4	Otud4	tr|A0A0R4J260|A0A0R4J260_MOUSE OTU domain-containing protein 4 OS=Mus musculus OX=10090 GN=Otud4 PE=1 SV=1;sp|B2RRE7|OTUD4_MOUSE OTU domain-containing protein 4 OS=Mus musculus OX=10090 GN=Otud4 PE=1 SV=1	2	1	1	1	1	0	1	0	0	0	1	0	1	0	0	0	1	0	1	0	0	0	1.4	1.4	1.4	122.93	1106	1106;1107	0.0011696	6.1826	By MS/MS		By matching				1.4	0	1.4	0	0	0
A0A0U1RPR4;A0A0U1RNN2;A0A0U1RP07;A0A0U1RNG1;Q9CWK3	A0A0U1RPR4;A0A0U1RNN2;A0A0U1RP07;A0A0U1RNG1;Q9CWK3	1;1;1;1;1	1;1;1;1;1	1;1;1;1;1	CD2 antigen cytoplasmic tail-binding protein 2	Cd2bp2	tr|A0A0U1RPR4|A0A0U1RPR4_MOUSE CD2 antigen cytoplasmic tail-binding protein 2 (Fragment) OS=Mus musculus OX=10090 GN=Cd2bp2 PE=1 SV=1;tr|A0A0U1RNN2|A0A0U1RNN2_MOUSE CD2 antigen cytoplasmic tail-binding protein 2 OS=Mus musculus OX=10090 GN=Cd2bp2 PE=1 SV=1	5	1	1	1	1	1	1	0	0	0	1	1	1	0	0	0	1	1	1	0	0	0	29.2	29.2	29.2	5.0797	48	48;79;130;162;342	0	6.7152	By MS/MS	By MS/MS	By MS/MS				29.2	29.2	29.2	0	0	0
A0A0U1RNK7;E9PX48;A2A9M5;A2A9M4;Q8R1A4	A0A0U1RNK7;E9PX48;A2A9M5;A2A9M4;Q8R1A4	1;1;1;1;1	1;1;1;1;1	1;1;1;1;1	Dedicator of cytokinesis protein 7	Dock7	tr|A0A0U1RNK7|A0A0U1RNK7_MOUSE Dedicator of cytokinesis protein 7 OS=Mus musculus OX=10090 GN=Dock7 PE=1 SV=1;tr|E9PX48|E9PX48_MOUSE Dedicator of cytokinesis protein 7 OS=Mus musculus OX=10090 GN=Dock7 PE=1 SV=2;tr|A2A9M5|A2A9M5_MOUSE Dedicator of cytokine	5	1	1	1	1	1	1	0	0	0	1	1	1	0	0	0	1	1	1	0	0	0	0.7	0.7	0.7	238.09	2098	2098;2100;2128;2130;2130	0	6.6298	By MS/MS	By matching	By MS/MS				0.7	0.7	0.7	0	0	0
A0A0U1RPE1;A0A0U1RPD3;D3Z3Y4;Q921W2;P70318	A0A0U1RPE1;A0A0U1RPD3;D3Z3Y4;Q921W2;P70318	1;1;1;1;1	1;1;1;1;1	1;1;1;1;1	Nucleolysin TIAR	Tial1	tr|A0A0U1RPE1|A0A0U1RPE1_MOUSE Nucleolysin TIAR (Fragment) OS=Mus musculus OX=10090 GN=Tial1 PE=1 SV=1;tr|A0A0U1RPD3|A0A0U1RPD3_MOUSE Nucleolysin TIAR OS=Mus musculus OX=10090 GN=Tial1 PE=1 SV=1;tr|D3Z3Y4|D3Z3Y4_MOUSE Nucleolysin TIAR OS=Mus musculus OX=10	5	1	1	1	0	0	0	1	1	1	0	0	0	1	1	1	0	0	0	1	1	1	10.4	10.4	10.4	11.847	106	106;244;336;375;392	0.0011682	6.1685				By matching	By MS/MS	By matching	0	0	0	10.4	10.4	10.4
A0A0U1RPD8;Q8K284	A0A0U1RPD8;Q8K284	1;1	1;1	1;1	General transcription factor 3C polypeptide 1	Gtf3c1	tr|A0A0U1RPD8|A0A0U1RPD8_MOUSE General transcription factor 3C polypeptide 1 OS=Mus musculus OX=10090 GN=Gtf3c1 PE=1 SV=1;sp|Q8K284|TF3C1_MOUSE General transcription factor 3C polypeptide 1 OS=Mus musculus OX=10090 GN=Gtf3c1 PE=1 SV=2	2	1	1	1	1	1	1	0	0	0	1	1	1	0	0	0	1	1	1	0	0	0	0.5	0.5	0.5	226.76	2005	2005;2101	0.0053533	5.9495	By matching	By MS/MS	By MS/MS				0.5	0.5	0.5	0	0	0
E9Q5Q0;Q3TGG2;A0A0U1RPL0;Q7TQH0;J3QP59	E9Q5Q0;Q3TGG2;A0A0U1RPL0;Q7TQH0	4;4;4;4;1	4;4;4;4;1	4;4;4;4;1	Ataxin-2-like protein	Atxn2l	tr|E9Q5Q0|E9Q5Q0_MOUSE Ataxin-2-like protein (Fragment) OS=Mus musculus OX=10090 GN=Atxn2l PE=1 SV=2;tr|Q3TGG2|Q3TGG2_MOUSE Ataxin-2-like protein OS=Mus musculus OX=10090 GN=Atxn2l PE=1 SV=1;tr|A0A0U1RPL0|A0A0U1RPL0_MOUSE Ataxin-2-like protein OS=Mus muscu	5	4	4	4	1	4	2	1	2	2	1	4	2	1	2	2	1	4	2	1	2	2	5.1	5.1	5.1	92.071	863	863;994;1096;1049;218	0	23.733	By MS/MS	By MS/MS	By MS/MS	By matching	By matching	By matching	1	5.1	3	1	2.1	2.1
D3Z510;A0A0U1RPN8;D3YV98;A0A0U1RPT5;D3YWI1;A6ZI44;P05064;A6ZI47;Q9CPQ9;A6ZI46	D3Z510;A0A0U1RPN8;D3YV98;A0A0U1RPT5;D3YWI1;A6ZI44;P05064;A6ZI47;Q9CPQ9;A6ZI46	4;4;4;4;4;4;4;3;2;2	4;4;4;4;4;4;4;3;2;2	4;4;4;4;4;4;4;3;2;2	Fructose-bisphosphate aldolase;Fructose-bisphosphate aldolase A	Aldoa;Aldoart2;Aldoart1	tr|D3Z510|D3Z510_MOUSE Fructose-bisphosphate aldolase A (Fragment) OS=Mus musculus OX=10090 GN=Aldoa PE=1 SV=2;tr|A0A0U1RPN8|A0A0U1RPN8_MOUSE Fructose-bisphosphate aldolase A (Fragment) OS=Mus musculus OX=10090 GN=Aldoa PE=1 SV=1;tr|D3YV98|D3YV98_MOUSE Fru	10	4	4	4	3	3	3	2	2	1	3	3	3	2	2	1	3	3	3	2	2	1	20.6	20.6	20.6	19.573	180	180;190;193;209;236;418;364;364;364;419	0	38.879	By MS/MS	By MS/MS	By MS/MS	By matching	By matching	By matching	20	20.6	20.6	16.1	12.8	4.4
A0A140T8V5;P17918	A0A140T8V5;P17918	1;1	1;1	1;1	Proliferating cell nuclear antigen	Pcna	tr|A0A140T8V5|A0A140T8V5_MOUSE Proliferating cell nuclear antigen OS=Mus musculus OX=10090 GN=Pcna-ps2 PE=3 SV=1;sp|P17918|PCNA_MOUSE Proliferating cell nuclear antigen OS=Mus musculus OX=10090 GN=Pcna PE=1 SV=2	2	1	1	1	1	1	1	0	1	1	1	1	1	0	1	1	1	1	1	0	1	1	5	5	5	28.785	261	261;261	0	9.6676	By matching	By matching	By matching		By matching	By MS/MS	5	5	5	0	5	5
A0A1B0GQU8;P35980;A0A1B0GSF7;A0A1B0GSS8;A0A1B0GSA8;A0A1B0GRZ3;A0A1B0GS28	A0A1B0GQU8;P35980;A0A1B0GSF7;A0A1B0GSS8;A0A1B0GSA8	4;4;3;3;2;1;1	4;4;3;3;2;1;1	4;4;3;3;2;1;1	60S ribosomal protein L18	Rpl18	tr|A0A1B0GQU8|A0A1B0GQU8_MOUSE 60S ribosomal protein L18 OS=Mus musculus OX=10090 GN=Rpl18 PE=1 SV=1;sp|P35980|RL18_MOUSE 60S ribosomal protein L18 OS=Mus musculus OX=10090 GN=Rpl18 PE=1 SV=3;tr|A0A1B0GSF7|A0A1B0GSF7_MOUSE 60S ribosomal protein L18 OS=Mus	7	4	4	4	4	4	4	3	4	4	4	4	4	3	4	4	4	4	4	3	4	4	28.9	28.9	28.9	18.101	159	159;188;136;155;126;57;80	0	37.304	By MS/MS	By MS/MS	By MS/MS	By MS/MS	By MS/MS	By MS/MS	28.9	28.9	28.9	23.3	28.9	28.9
A0A1B0GQZ1;A0A1B0GSZ9;O35972	A0A1B0GQZ1;A0A1B0GSZ9;O35972	1;1;1	1;1;1	1;1;1	39S ribosomal protein L23, mitochondrial	Mrpl23	tr|A0A1B0GQZ1|A0A1B0GQZ1_MOUSE 39S ribosomal protein L23, mitochondrial OS=Mus musculus OX=10090 GN=Mrpl23 PE=1 SV=1;tr|A0A1B0GSZ9|A0A1B0GSZ9_MOUSE 39S ribosomal protein L23, mitochondrial OS=Mus musculus OX=10090 GN=Mrpl23 PE=1 SV=1;sp|O35972|RM23_MOUSE 3	3	1	1	1	1	1	1	0	0	1	1	1	1	0	0	1	1	1	1	0	0	1	12.9	12.9	12.9	11.89	101	101;172;146	0	7.1027	By matching	By MS/MS	By matching			By matching	12.9	12.9	12.9	0	0	12.9
A0A1B0GR91	A0A1B0GR91	2	2	2			tr|A0A1B0GR91|A0A1B0GR91_MOUSE Uncharacterized protein OS=Mus musculus OX=10090 GN=Gm4779 PE=4 SV=1	1	2	2	2	2	2	2	0	1	1	2	2	2	0	1	1	2	2	2	0	1	1	3.9	3.9	3.9	59.993	561	561	0	11.796	By matching	By MS/MS	By matching		By matching	By matching	3.9	3.9	3.9	0	1.8	1.8
A0A1B0GRR3;P62281;A0A1B0GSE8	A0A1B0GRR3;P62281;A0A1B0GSE8	8;8;5	8;8;5	8;8;5	40S ribosomal protein S11	Rps11	tr|A0A1B0GRR3|A0A1B0GRR3_MOUSE 40S ribosomal protein S11 OS=Mus musculus OX=10090 GN=Rps11 PE=1 SV=1;sp|P62281|RS11_MOUSE 40S ribosomal protein S11 OS=Mus musculus OX=10090 GN=Rps11 PE=1 SV=3;tr|A0A1B0GSE8|A0A1B0GSE8_MOUSE 40S ribosomal protein S11 (Fragme	3	8	8	8	6	7	6	6	8	6	6	7	6	6	8	6	6	7	6	6	8	6	33.8	33.8	33.8	15.198	130	130;158;135	0	56.139	By MS/MS	By MS/MS	By MS/MS	By MS/MS	By MS/MS	By MS/MS	31.5	33.8	31.5	31.5	33.8	31.5
A0A1B0GSQ6;A0A1B0GTA1;A0A1B0GS68;P19253;A0A1B0GSB2;A0A1B0GT00;A0A140T8K2;A0A1B0GSC2;A0A1B0GQW6;A0A1B0GSF0;A0A1B0GSL5;A0A1B0GSJ2;A0A1B0GRH1	A0A1B0GSQ6;A0A1B0GTA1;A0A1B0GS68;P19253;A0A1B0GSB2;A0A1B0GT00;A0A140T8K2;A0A1B0GSC2	6;6;6;6;5;4;4;3;2;2;1;1;1	6;6;6;6;5;4;4;3;2;2;1;1;1	6;6;6;6;5;4;4;3;2;2;1;1;1	60S ribosomal protein L13a	Rpl13a	tr|A0A1B0GSQ6|A0A1B0GSQ6_MOUSE 60S ribosomal protein L13a (Fragment) OS=Mus musculus OX=10090 GN=Rpl13a PE=3 SV=1;tr|A0A1B0GTA1|A0A1B0GTA1_MOUSE 60S ribosomal protein L13a (Fragment) OS=Mus musculus OX=10090 GN=Rpl13a PE=3 SV=1;tr|A0A1B0GS68|A0A1B0GS68_MOU	13	6	6	6	5	4	4	4	4	4	5	4	4	4	4	4	5	4	4	4	4	4	26.9	26.9	26.9	19.031	167	167;177;446;203;148;133;203;122;70;131;110;110;128	0	36.263	By MS/MS	By MS/MS	By MS/MS	By matching	By MS/MS	By MS/MS	26.3	22.8	22.2	22.2	19.8	19.8
A0A1B0GSR9;Q564E2;A0A1B0GSX0;P06151	A0A1B0GSR9;Q564E2;A0A1B0GSX0;P06151	2;2;2;2	2;2;2;2	2;2;2;2	L-lactate dehydrogenase;L-lactate dehydrogenase A chain	Ldha	tr|A0A1B0GSR9|A0A1B0GSR9_MOUSE L-lactate dehydrogenase OS=Mus musculus OX=10090 GN=Ldha PE=1 SV=1;tr|Q564E2|Q564E2_MOUSE L-lactate dehydrogenase OS=Mus musculus OX=10090 GN=Ldha PE=1 SV=1;tr|A0A1B0GSX0|A0A1B0GSX0_MOUSE L-lactate dehydrogenase OS=Mus muscul	4	2	2	2	2	2	2	1	1	1	2	2	2	1	1	1	2	2	2	1	1	1	9.5	9.5	9.5	34.599	315	315;332;361;332	0	17.516	By MS/MS	By MS/MS	By MS/MS	By matching	By MS/MS	By MS/MS	9.5	9.5	9.5	3.2	3.2	3.2
A0A1B0GSU8;A0A1B0GT78;Q7TMK6	A0A1B0GSU8;A0A1B0GT78;Q7TMK6	1;1;1	1;1;1	1;1;1	Protein Hook homolog 2	Hook2	tr|A0A1B0GSU8|A0A1B0GSU8_MOUSE Protein Hook homolog 2 OS=Mus musculus OX=10090 GN=Hook2 PE=1 SV=1;tr|A0A1B0GT78|A0A1B0GT78_MOUSE Protein Hook homolog 2 OS=Mus musculus OX=10090 GN=Hook2 PE=1 SV=1;sp|Q7TMK6|HOOK2_MOUSE Protein Hook homolog 2 OS=Mus musculus	3	1	1	1	0	0	1	0	0	0	0	0	1	0	0	0	0	0	1	0	0	0	1.6	1.6	1.6	70.143	611	611;692;716	0	6.651			By MS/MS				0	0	1.6	0	0	0
A0A1B0GT70;Q8BFZ9	A0A1B0GT70;Q8BFZ9	1;1	1;1	1;1	Erlin-2	Erlin2	tr|A0A1B0GT70|A0A1B0GT70_MOUSE Erlin-2 (Fragment) OS=Mus musculus OX=10090 GN=Erlin2 PE=1 SV=1;sp|Q8BFZ9|ERLN2_MOUSE Erlin-2 OS=Mus musculus OX=10090 GN=Erlin2 PE=1 SV=1	2	1	1	1	1	1	1	0	1	1	1	1	1	0	1	1	1	1	1	0	1	1	4.8	4.8	4.8	28.274	251	251;340	0	9.6185	By matching	By matching	By MS/MS		By matching	By matching	4.8	4.8	4.8	0	4.8	4.8
A0A1D5RLW4;E9QKV6;A0A1D5RLD1;E9PWZ6;E9PZW8;Q9QY06	A0A1D5RLW4;E9QKV6;A0A1D5RLD1;E9PWZ6;E9PZW8;Q9QY06	1;1;1;1;1;1	1;1;1;1;1;1	1;1;1;1;1;1	Unconventional myosin-IXb	Myo9b	tr|A0A1D5RLW4|A0A1D5RLW4_MOUSE Unconventional myosin-IXb (Fragment) OS=Mus musculus OX=10090 GN=Myo9b PE=1 SV=1;tr|E9QKV6|E9QKV6_MOUSE Unconventional myosin-IXb OS=Mus musculus OX=10090 GN=Myo9b PE=1 SV=1;tr|A0A1D5RLD1|A0A1D5RLD1_MOUSE Unconventional myosi	6	1	1	1	1	0	1	0	0	0	1	0	1	0	0	0	1	0	1	0	0	0	1.5	1.5	1.5	87.813	787	787;1961;1963;1975;2128;2114	0	10.398	By MS/MS		By MS/MS				1.5	0	1.5	0	0	0
S4R1W1;A0A1D5RLD8;P16858;A0A0A0MQF6;S4R257;V9GX06;S4R1N5;V9GXA7;V9GXK0;A0A0R4J0X7;S4R2G5;Q64467	S4R1W1;A0A1D5RLD8;P16858;A0A0A0MQF6;S4R257	12;12;12;11;7;4;3;1;1;1;1;1	12;12;12;11;7;4;3;1;1;1;1;1	12;12;12;11;7;4;3;1;1;1;1;1	Glyceraldehyde-3-phosphate dehydrogenase	Gm3839;Gapdh	tr|S4R1W1|S4R1W1_MOUSE Glyceraldehyde-3-phosphate dehydrogenase OS=Mus musculus OX=10090 GN=Gm3839 PE=1 SV=1;tr|A0A1D5RLD8|A0A1D5RLD8_MOUSE Glyceraldehyde-3-phosphate dehydrogenase OS=Mus musculus OX=10090 GN=Gm10358 PE=1 SV=1;sp|P16858|G3P_MOUSE Glycerald	12	12	12	12	11	11	10	7	11	10	11	11	10	7	11	10	11	11	10	7	11	10	36.9	36.9	36.9	35.812	333	333;333;333;359;280;183;57;121;151;438;440;440	0	110.03	By MS/MS	By MS/MS	By MS/MS	By MS/MS	By MS/MS	By MS/MS	34.5	34.5	26.1	18	28.5	21.3
A0A1D5RLR3;B2RUP0;Q8C5L7	A0A1D5RLR3;B2RUP0;Q8C5L7	2;2;2	2;2;2	2;2;2	RNA-binding protein 34	Rbm34	tr|A0A1D5RLR3|A0A1D5RLR3_MOUSE RNA-binding protein 34 OS=Mus musculus OX=10090 GN=Rbm34 PE=1 SV=1;tr|B2RUP0|B2RUP0_MOUSE RNA binding motif protein 34 OS=Mus musculus OX=10090 GN=Rbm34 PE=1 SV=1;sp|Q8C5L7|RBM34_MOUSE RNA-binding protein 34 OS=Mus musculus O	3	2	2	2	2	2	2	1	1	2	2	2	2	1	1	2	2	2	2	1	1	2	6.4	6.4	6.4	46.699	422	422;442;375	0	14.823	By MS/MS	By MS/MS	By MS/MS	By matching	By matching	By MS/MS	6.4	6.4	6.4	4	4	6.4
A0A1D5RLW5;A0A1D5RM85;P62717;A0A1D5RME4;A0A1D5RMC7;A0A1D5RM79	A0A1D5RLW5;A0A1D5RM85;P62717;A0A1D5RME4	3;3;3;2;1;1	3;3;3;2;1;1	3;3;3;2;1;1	60S ribosomal protein L18a	Rpl18a	tr|A0A1D5RLW5|A0A1D5RLW5_MOUSE 60S ribosomal protein L18a OS=Mus musculus OX=10090 GN=Rpl18a PE=1 SV=1;tr|A0A1D5RM85|A0A1D5RM85_MOUSE 60S ribosomal protein L18a (Fragment) OS=Mus musculus OX=10090 GN=Rpl18a PE=1 SV=1;sp|P62717|RL18A_MOUSE 60S ribosomal pro	6	3	3	3	3	3	3	3	3	3	3	3	3	3	3	3	3	3	3	3	3	3	17.7	17.7	17.7	17.447	147	147;219;176;123;70;109	0	18.974	By MS/MS	By MS/MS	By MS/MS	By matching	By MS/MS	By MS/MS	17.7	17.7	17.7	17.7	17.7	17.7
A0A1D5RLY9;Q80TE4	A0A1D5RLY9;Q80TE4	5;5	5;5	5;5	Signal-induced proliferation-associated 1-like protein 2	Sipa1l2	tr|A0A1D5RLY9|A0A1D5RLY9_MOUSE Signal-induced proliferation-associated 1-like protein 2 OS=Mus musculus OX=10090 GN=Sipa1l2 PE=1 SV=1;sp|Q80TE4|SI1L2_MOUSE Signal-induced proliferation-associated 1-like protein 2 OS=Mus musculus OX=10090 GN=Sipa1l2 PE=1 SV	2	5	5	5	5	5	5	0	0	0	5	5	5	0	0	0	5	5	5	0	0	0	3.3	3.3	3.3	187.46	1704	1704;1722	0	38.16	By MS/MS	By MS/MS	By MS/MS				3.3	3.3	3.3	0	0	0
A0A1D5RML9;A0A1D5RMD8;B7ZWL1;A0A1D5RMJ8;Q6ZQ08;A0A1D5RMB6	A0A1D5RML9;A0A1D5RMD8;B7ZWL1;A0A1D5RMJ8;Q6ZQ08;A0A1D5RMB6	2;2;2;2;2;1	2;2;2;2;2;1	2;2;2;2;2;1	CCR4-NOT transcription complex subunit 1	Cnot1	tr|A0A1D5RML9|A0A1D5RML9_MOUSE CCR4-NOT transcription complex subunit 1 (Fragment) OS=Mus musculus OX=10090 GN=Cnot1 PE=1 SV=1;tr|A0A1D5RMD8|A0A1D5RMD8_MOUSE CCR4-NOT transcription complex subunit 1 OS=Mus musculus OX=10090 GN=Cnot1 PE=1 SV=1;tr|B7ZWL1|B7Z	6	2	2	2	2	2	2	0	2	2	2	2	2	0	2	2	2	2	2	0	2	2	2.6	2.6	2.6	91.155	823	823;1614;2326;2369;2375;92	0	11.828	By MS/MS	By matching	By MS/MS		By matching	By matching	2.6	2.6	2.6	0	2.6	2.6
A0A1L1SQA8;P62852	A0A1L1SQA8;P62852	2;2	2;2	2;2	40S ribosomal protein S25	Rps25	tr|A0A1L1SQA8|A0A1L1SQA8_MOUSE 40S ribosomal protein S25 OS=Mus musculus OX=10090 GN=Rps25 PE=1 SV=1;sp|P62852|RS25_MOUSE 40S ribosomal protein S25 OS=Mus musculus OX=10090 GN=Rps25 PE=1 SV=1	2	2	2	2	2	1	2	0	1	1	2	1	2	0	1	1	2	1	2	0	1	1	25.8	25.8	25.8	10.309	93	93;125	0	33.293	By matching	By MS/MS	By MS/MS		By MS/MS	By MS/MS	25.8	10.8	25.8	0	10.8	15.1
A0A1L1SQE2;E9QP54;Q8K3E5	A0A1L1SQE2;E9QP54;Q8K3E5	1;1;1	1;1;1	1;1;1	Jouberin	Ahi1	tr|A0A1L1SQE2|A0A1L1SQE2_MOUSE Jouberin OS=Mus musculus OX=10090 GN=Ahi1 PE=1 SV=1;tr|E9QP54|E9QP54_MOUSE Jouberin OS=Mus musculus OX=10090 GN=Ahi1 PE=1 SV=1;sp|Q8K3E5|AHI1_MOUSE Jouberin OS=Mus musculus OX=10090 GN=Ahi1 PE=1 SV=2	3	1	1	1	1	1	1	0	0	0	1	1	1	0	0	0	1	1	1	0	0	0	2	2	2	114.97	1005	1005;1047;1047	0	6.8302	By matching	By matching	By MS/MS				2	2	2	0	0	0
A0A1L1SQR7;Q45VK5;A0A1L1STE4;Q91WM1;Q9Z1X4	A0A1L1SQR7;Q45VK5;A0A1L1STE4;Q91WM1;Q9Z1X4	1;1;1;1;1	1;1;1;1;1	1;1;1;1;1	Spermatid perinuclear RNA-binding protein;Interleukin enhancer-binding factor 3	Ilf3;Strbp	tr|A0A1L1SQR7|A0A1L1SQR7_MOUSE Interleukin enhancer-binding factor 3 (Fragment) OS=Mus musculus OX=10090 GN=Ilf3 PE=1 SV=1;tr|Q45VK5|Q45VK5_MOUSE Interleukin enhancer-binding factor 3 OS=Mus musculus OX=10090 GN=Ilf3 PE=1 SV=1;tr|A0A1L1STE4|A0A1L1STE4_MOUS	5	1	1	1	1	0	1	1	1	1	1	0	1	1	1	1	1	0	1	1	1	1	6.2	6.2	6.2	18.671	177	177;703;908;672;898	0	7.2631	By matching		By MS/MS	By matching	By matching	By matching	6.2	0	6.2	6.2	6.2	6.2
A0A1L1SR69;A0A1L1ST61;A0A1L1SV00;Q8R472;Q9JLR9	A0A1L1SR69;A0A1L1ST61;A0A1L1SV00;Q8R472;Q9JLR9	1;1;1;1;1	1;1;1;1;1	1;1;1;1;1	HIG1 domain family member 1A, mitochondrial	Higd1a	tr|A0A1L1SR69|A0A1L1SR69_MOUSE HIG1 domain family member 1A, mitochondrial (Fragment) OS=Mus musculus OX=10090 GN=Higd1a PE=1 SV=1;tr|A0A1L1ST61|A0A1L1ST61_MOUSE HIG1 domain family member 1A, mitochondrial (Fragment) OS=Mus musculus OX=10090 GN=Higd1a PE=1	5	1	1	1	1	1	1	0	0	0	1	1	1	0	0	0	1	1	1	0	0	0	28.6	28.6	28.6	6.91	63	63;76;84;99;95	0	26.429	By matching	By MS/MS	By matching				28.6	28.6	28.6	0	0	0
A0A1L1SR96;Q6PB70	A0A1L1SR96;Q6PB70	2;2	2;2	2;2	Anoctamin-8	Ano8	tr|A0A1L1SR96|A0A1L1SR96_MOUSE Anoctamin OS=Mus musculus OX=10090 GN=Ano8 PE=1 SV=1;sp|Q6PB70|ANO8_MOUSE Anoctamin-8 OS=Mus musculus OX=10090 GN=Ano8 PE=1 SV=3	2	2	2	2	1	1	1	0	0	0	1	1	1	0	0	0	1	1	1	0	0	0	2.5	2.5	2.5	123.99	1104	1104;1060	0	12.988	By MS/MS	By MS/MS	By MS/MS				1.1	1.4	1.4	0	0	0
A0A1L1SRW0;P14206	A0A1L1SRW0;P14206	2;2	2;2	2;2	40S ribosomal protein SA	Rpsa	tr|A0A1L1SRW0|A0A1L1SRW0_MOUSE 40S ribosomal protein SA (Fragment) OS=Mus musculus OX=10090 GN=Rpsa PE=1 SV=1;sp|P14206|RSSA_MOUSE 40S ribosomal protein SA OS=Mus musculus OX=10090 GN=Rpsa PE=1 SV=4	2	2	2	2	1	2	2	1	1	1	1	2	2	1	1	1	1	2	2	1	1	1	22.6	22.6	22.6	10.125	93	93;295	0	20.329	By MS/MS	By MS/MS	By MS/MS	By MS/MS	By MS/MS	By MS/MS	14	22.6	22.6	14	14	14
Q3UDS7;A0A1L1SSF2;Q8VDL4	Q3UDS7;A0A1L1SSF2;Q8VDL4	1;1;1	1;1;1	1;1;1	ADP-dependent glucokinase	Adpgk	tr|Q3UDS7|Q3UDS7_MOUSE ADP-dependent glucokinase OS=Mus musculus OX=10090 GN=Adpgk PE=1 SV=1;tr|A0A1L1SSF2|A0A1L1SSF2_MOUSE ADP-dependent glucokinase OS=Mus musculus OX=10090 GN=Adpgk PE=1 SV=1;sp|Q8VDL4|ADPGK_MOUSE ADP-dependent glucokinase OS=Mus musculu	3	1	1	1	1	1	1	0	1	1	1	1	1	0	1	1	1	1	1	0	1	1	3	3	3	53.788	495	495;496;496	0	8.5655	By matching	By MS/MS	By matching		By MS/MS	By MS/MS	3	3	3	0	3	3
A0A1L1SV73;Q8BY87	A0A1L1SV73;Q8BY87	2;1	2;1	2;1	Ubiquitin carboxyl-terminal hydrolase 47	Usp47	tr|A0A1L1SV73|A0A1L1SV73_MOUSE Ubiquitin carboxyl-terminal hydrolase 47 OS=Mus musculus OX=10090 GN=Usp47 PE=1 SV=1;sp|Q8BY87|UBP47_MOUSE Ubiquitin carboxyl-terminal hydrolase 47 OS=Mus musculus OX=10090 GN=Usp47 PE=1 SV=2	2	2	2	2	1	0	1	0	1	2	1	0	1	0	1	2	1	0	1	0	1	2	1.4	1.4	1.4	157.15	1376	1376;1376	0	11.536	By MS/MS		By MS/MS		By matching	By MS/MS	0.7	0	0.7	0	0.7	1.4
A0A1S6GWJ4;Q91VN6	A0A1S6GWJ4;Q91VN6	3;3	3;3	3;3	Probable ATP-dependent RNA helicase DDX41	Ddx41	tr|A0A1S6GWJ4|A0A1S6GWJ4_MOUSE DEAD (Asp-Glu-Ala-Asp) box polypeptide 41 OS=Mus musculus OX=10090 GN=Ddx41 PE=1 SV=1;sp|Q91VN6|DDX41_MOUSE Probable ATP-dependent RNA helicase DDX41 OS=Mus musculus OX=10090 GN=Ddx41 PE=1 SV=2	2	3	3	3	2	1	2	3	3	3	2	1	2	3	3	3	2	1	2	3	3	3	4.6	4.6	4.6	71.1	633	633;622	0	19.152	By matching	By matching	By matching	By matching	By MS/MS	By MS/MS	2.8	1.4	2.8	4.6	4.6	4.6
A0A1W2P6G5;A0A1W2P6F6;A0A1W2P7Q9;Q60605;Q8CI43	A0A1W2P6G5;A0A1W2P6F6;A0A1W2P7Q9;Q60605	3;3;3;3;1	3;3;3;3;1	3;3;3;3;1	Myosin light polypeptide 6	Myl6	tr|A0A1W2P6G5|A0A1W2P6G5_MOUSE Myosin light polypeptide 6 OS=Mus musculus OX=10090 GN=Myl6 PE=1 SV=1;tr|A0A1W2P6F6|A0A1W2P6F6_MOUSE Myosin light polypeptide 6 OS=Mus musculus OX=10090 GN=Myl6 PE=1 SV=1;tr|A0A1W2P7Q9|A0A1W2P7Q9_MOUSE Myosin light polypeptid	5	3	3	3	2	3	2	2	2	2	2	3	2	2	2	2	2	3	2	2	2	2	26.6	26.6	26.6	15.448	139	139;152;158;151;207	0	22.516	By MS/MS	By MS/MS	By MS/MS	By matching	By MS/MS	By MS/MS	15.8	26.6	15.8	15.8	15.8	15.8
A0A1W2P855;A0A1W2P7Z8;A0A1W2P7S8;A0A1W2P7H4;A0A1W2P6Q8;Q6A068	A0A1W2P855;A0A1W2P7Z8;A0A1W2P7S8;A0A1W2P7H4;A0A1W2P6Q8;Q6A068	3;3;3;3;3;3	3;3;3;3;3;3	3;3;3;3;3;3	Cell division cycle 5-like protein	Cdc5l	tr|A0A1W2P855|A0A1W2P855_MOUSE Uncharacterized protein OS=Mus musculus OX=10090 GN=Gm9046 PE=4 SV=1;tr|A0A1W2P7Z8|A0A1W2P7Z8_MOUSE Predicted gene 9045 OS=Mus musculus OX=10090 GN=Gm9045 PE=4 SV=1;tr|A0A1W2P7S8|A0A1W2P7S8_MOUSE Predicted gene, 32717 OS=Mus	6	3	3	3	2	3	3	1	1	3	2	3	3	1	1	3	2	3	3	1	1	3	4.9	4.9	4.9	92.152	802	802;802;802;802;802;802	0	18.598	By matching	By MS/MS	By MS/MS	By matching	By matching	By matching	3.4	4.9	4.9	1.5	1.9	4.9
Q6ZWZ6;F7AEH4;A0A1W2P7A1;P63323	Q6ZWZ6;F7AEH4;A0A1W2P7A1;P63323	1;1;1;1	1;1;1;1	1;1;1;1	40S ribosomal protein S12	Rps12	tr|Q6ZWZ6|Q6ZWZ6_MOUSE 40S ribosomal protein S12 OS=Mus musculus OX=10090 GN=Rps12-ps3 PE=1 SV=1;tr|F7AEH4|F7AEH4_MOUSE 40S ribosomal protein S12 OS=Mus musculus OX=10090 GN=Rps12 PE=1 SV=1;tr|A0A1W2P7A1|A0A1W2P7A1_MOUSE 40S ribosomal protein S12 OS=Mus mu	4	1	1	1	1	1	1	1	1	1	1	1	1	1	1	1	1	1	1	1	1	1	7.6	7.6	7.6	14.515	132	132;137;148;132	0	8.4938	By matching	By MS/MS	By matching	By matching	By MS/MS	By MS/MS	7.6	7.6	7.6	7.6	7.6	7.6
A0A1W2P7H9;A0A1W2P7T3;P84089	A0A1W2P7H9;A0A1W2P7T3;P84089	1;1;1	1;1;1	1;1;1	Enhancer of rudimentary homolog	Erh	tr|A0A1W2P7H9|A0A1W2P7H9_MOUSE Enhancer of rudimentary homolog OS=Mus musculus OX=10090 GN=Erh PE=1 SV=1;tr|A0A1W2P7T3|A0A1W2P7T3_MOUSE Enhancer of rudimentary homolog OS=Mus musculus OX=10090 GN=Erh PE=1 SV=1;sp|P84089|ERH_MOUSE Enhancer of rudimentary ho	3	1	1	1	1	1	1	1	1	1	1	1	1	1	1	1	1	1	1	1	1	1	15.5	15.5	15.5	8.2033	71	71;89;104	0	9.4265	By MS/MS	By MS/MS	By MS/MS	By matching	By matching	By MS/MS	15.5	15.5	15.5	15.5	15.5	15.5
A0A1W2P7P4;P28574	A0A1W2P7P4;P28574	1;1	1;1	1;1	Protein max	Max	tr|A0A1W2P7P4|A0A1W2P7P4_MOUSE Protein max OS=Mus musculus OX=10090 GN=Max PE=1 SV=1;sp|P28574|MAX_MOUSE Protein max OS=Mus musculus OX=10090 GN=Max PE=1 SV=2	2	1	1	1	1	1	1	0	0	1	1	1	1	0	0	1	1	1	1	0	0	1	8.1	8.1	8.1	14.027	124	124;160	0.003367	6.0694	By matching	By MS/MS	By matching			By matching	8.1	8.1	8.1	0	0	8.1
A0A1W2P7U7;Q99LL5	A0A1W2P7U7;Q99LL5	1;1	1;1	1;1	Periodic tryptophan protein 1 homolog	Pwp1	tr|A0A1W2P7U7|A0A1W2P7U7_MOUSE Periodic tryptophan protein 1 homolog OS=Mus musculus OX=10090 GN=Pwp1 PE=1 SV=1;sp|Q99LL5|PWP1_MOUSE Periodic tryptophan protein 1 homolog OS=Mus musculus OX=10090 GN=Pwp1 PE=1 SV=1	2	1	1	1	1	1	1	0	1	1	1	1	1	0	1	1	1	1	1	0	1	1	12.8	12.8	12.8	10.27	94	94;501	0.0054885	6.0101	By matching	By matching	By MS/MS		By matching	By matching	12.8	12.8	12.8	0	12.8	12.8
A0A1Y7VLU4;A0A1Y7VKX7;F8WJA0;Q9ESV0	A0A1Y7VLU4;A0A1Y7VKX7;F8WJA0;Q9ESV0	2;2;2;2	2;2;2;2	2;2;2;2	ATP-dependent RNA helicase DDX24	Ddx24	tr|A0A1Y7VLU4|A0A1Y7VLU4_MOUSE ATP-dependent RNA helicase DDX24 OS=Mus musculus OX=10090 GN=Ddx24 PE=1 SV=1;tr|A0A1Y7VKX7|A0A1Y7VKX7_MOUSE ATP-dependent RNA helicase DDX24 OS=Mus musculus OX=10090 GN=Ddx24 PE=1 SV=1;tr|F8WJA0|F8WJA0_MOUSE ATP-dependent RNA	4	2	2	2	2	2	2	2	2	2	2	2	2	2	2	2	2	2	2	2	2	2	20.2	20.2	20.2	13.132	119	119;791;903;857	0	22.451	By MS/MS	By MS/MS	By MS/MS	By matching	By matching	By matching	20.2	20.2	20.2	20.2	20.2	20.2
F6YVP7;A0A1Y7VKY1;P62270;S4R1N6	F6YVP7;A0A1Y7VKY1;P62270;S4R1N6	6;6;6;4	6;6;6;4	6;6;6;4	40S ribosomal protein S18	Gm10260;Rps18	tr|F6YVP7|F6YVP7_MOUSE Uncharacterized protein OS=Mus musculus OX=10090 GN=Gm10260 PE=3 SV=2;tr|A0A1Y7VKY1|A0A1Y7VKY1_MOUSE MCG116671 OS=Mus musculus OX=10090 GN=Gm11361 PE=3 SV=1;sp|P62270|RS18_MOUSE 40S ribosomal protein S18 OS=Mus musculus OX=10090 GN=R	4	6	6	6	5	4	5	4	5	6	5	4	5	4	5	6	5	4	5	4	5	6	32.2	32.2	32.2	17.671	152	152;152;152;107	0	48.721	By MS/MS	By MS/MS	By MS/MS	By MS/MS	By MS/MS	By MS/MS	27.6	21.7	27.6	19.7	27.6	32.2
A0A286YCB3;A0A286YD15;A0A286YDS3;A0A286YDP0;O35648	A0A286YCB3;A0A286YD15;A0A286YDS3;A0A286YDP0;O35648	1;1;1;1;1	1;1;1;1;1	1;1;1;1;1	Centrin-3	Cetn3	tr|A0A286YCB3|A0A286YCB3_MOUSE Centrin-3 (Fragment) OS=Mus musculus OX=10090 GN=Cetn3 PE=1 SV=1;tr|A0A286YD15|A0A286YD15_MOUSE Centrin-3 (Fragment) OS=Mus musculus OX=10090 GN=Cetn3 PE=1 SV=1;tr|A0A286YDS3|A0A286YDS3_MOUSE Centrin-3 (Fragment) OS=Mus muscu	5	1	1	1	1	1	1	0	0	0	1	1	1	0	0	0	1	1	1	0	0	0	13.8	13.8	13.8	9.8559	87	87;97;100;137;167	0	8.2738	By matching	By MS/MS	By MS/MS				13.8	13.8	13.8	0	0	0
A0A286YDZ1;A0A286YCD1;A0A286YDA2;A0A286YDT3;E9Q5C9;A0A286YDV7	A0A286YDZ1;A0A286YCD1;A0A286YDA2;A0A286YDT3;E9Q5C9;A0A286YDV7	1;1;1;1;1;1	1;1;1;1;1;1	1;1;1;1;1;1		Nolc1	tr|A0A286YDZ1|A0A286YDZ1_MOUSE Nucleolar and coiled-body phosphoprotein 1 (Fragment) OS=Mus musculus OX=10090 GN=Nolc1 PE=1 SV=1;tr|A0A286YCD1|A0A286YCD1_MOUSE Nucleolar and coiled-body phosphoprotein 1 (Fragment) OS=Mus musculus OX=10090 GN=Nolc1 PE=1 SV=	6	1	1	1	1	0	1	0	0	0	1	0	1	0	0	0	1	0	1	0	0	0	27.8	27.8	27.8	3.8694	36	36;197;700;701;702;702	0.0091278	5.8304	By MS/MS		By matching				27.8	0	27.8	0	0	0
A0A286YCD5;Q9CU65	A0A286YCD5;Q9CU65	1;1	1;1	1;1	Zinc finger MYM-type protein 2	Zmym2	tr|A0A286YCD5|A0A286YCD5_MOUSE Zinc finger MYM-type protein 2 OS=Mus musculus OX=10090 GN=Zmym2 PE=1 SV=1;sp|Q9CU65|ZMYM2_MOUSE Zinc finger MYM-type protein 2 OS=Mus musculus OX=10090 GN=Zmym2 PE=1 SV=3	2	1	1	1	0	1	1	1	0	0	0	1	1	1	0	0	0	1	1	1	0	0	4.5	4.5	4.5	30.78	290	290;1376	0.0011521	6.1396		By MS/MS	By MS/MS	By matching			0	4.5	4.5	4.5	0	0
A0A286YCG3;G5E8R4;Q922D4	A0A286YCG3;G5E8R4;Q922D4	1;1;1	1;1;1	1;1;1	Serine/threonine-protein phosphatase 6 regulatory subunit 3	Ppp6r3	tr|A0A286YCG3|A0A286YCG3_MOUSE Serine/threonine-protein phosphatase 6 regulatory subunit 3 (Fragment) OS=Mus musculus OX=10090 GN=Ppp6r3 PE=1 SV=1;tr|G5E8R4|G5E8R4_MOUSE SAPS domain family, member 3, isoform CRA_c OS=Mus musculus OX=10090 GN=Ppp6r3 PE=1 SV	3	1	1	1	1	1	1	0	1	1	1	1	1	0	1	1	1	1	1	0	1	1	6.1	6.1	6.1	25.213	228	228;873;844	0.0034052	6.0995	By matching	By matching	By MS/MS		By matching	By matching	6.1	6.1	6.1	0	6.1	6.1
A0A286YDB7;A0A286YCT4;A0A286YCG8;Q9CY50	A0A286YDB7;A0A286YCT4;A0A286YCG8;Q9CY50	1;1;1;1	1;1;1;1	1;1;1;1	Translocon-associated protein subunit alpha	Ssr1	tr|A0A286YDB7|A0A286YDB7_MOUSE Translocon-associated protein subunit alpha (Fragment) OS=Mus musculus OX=10090 GN=Ssr1 PE=1 SV=1;tr|A0A286YCT4|A0A286YCT4_MOUSE Translocon-associated protein subunit alpha OS=Mus musculus OX=10090 GN=Ssr1 PE=1 SV=1;tr|A0A286	4	1	1	1	1	1	1	1	1	1	1	1	1	1	1	1	1	1	1	1	1	1	9.6	9.6	9.6	13.111	115	115;298;318;286	0	8.0442	By MS/MS	By MS/MS	By MS/MS	By matching	By matching	By matching	9.6	9.6	9.6	9.6	9.6	9.6
A0A286YCQ5;O88322	A0A286YCQ5;O88322	1;1	1;1	1;1	Nidogen-2	Nid2	tr|A0A286YCQ5|A0A286YCQ5_MOUSE Nidogen-2 (Fragment) OS=Mus musculus OX=10090 GN=Nid2 PE=1 SV=1;sp|O88322|NID2_MOUSE Nidogen-2 OS=Mus musculus OX=10090 GN=Nid2 PE=1 SV=2	2	1	1	1	1	0	1	0	1	1	1	0	1	0	1	1	1	0	1	0	1	1	0.7	0.7	0.7	128.41	1171	1171;1403	0.0073607	5.9077	By MS/MS		By MS/MS		By matching	By MS/MS	0.7	0	0.7	0	0.7	0.7
A0A286YD84;A0A286YDY4;A7YY80;Q9WV92	A0A286YD84;A0A286YDY4;A7YY80;Q9WV92	1;1;1;1	1;1;1;1	1;1;1;1	Band 4.1-like protein 3;Band 4.1-like protein 3, N-terminally processed	Epb4.1l3;Epb41l3	tr|A0A286YD84|A0A286YD84_MOUSE Band 4.1-like protein 3 (Fragment) OS=Mus musculus OX=10090 GN=Epb41l3 PE=1 SV=1;tr|A0A286YDY4|A0A286YDY4_MOUSE Band 4.1-like protein 3 (Fragment) OS=Mus musculus OX=10090 GN=Epb41l3 PE=1 SV=1;tr|A7YY80|A7YY80_MOUSE 130kDa Pr	4	1	1	1	1	1	1	0	0	0	1	1	1	0	0	0	1	1	1	0	0	0	2.5	2.5	2.5	67.253	605	605;852;876;929	0	7.543	By MS/MS	By MS/MS	By matching				2.5	2.5	2.5	0	0	0
A0A286YDI8;G3X972	A0A286YDI8;G3X972	1;1	1;1	1;1		Sec24c	tr|A0A286YDI8|A0A286YDI8_MOUSE Sec24-related gene family, member C (S. cerevisiae) OS=Mus musculus OX=10090 GN=Sec24c PE=1 SV=1;tr|G3X972|G3X972_MOUSE SEC24 related gene family, member C (S. cerevisiae), isoform CRA_a OS=Mus musculus OX=10090 GN=Sec24c PE=	2	1	1	1	1	1	1	0	0	0	1	1	1	0	0	0	1	1	1	0	0	0	1.3	1.3	1.3	111.61	1020	1020;1096	0	7.9209	By MS/MS	By MS/MS	By MS/MS				1.3	1.3	1.3	0	0	0
A0A2I3BPN6;E9QAP7	A0A2I3BPN6;E9QAP7	1;1	1;1	1;1		Taf4a	tr|A0A2I3BPN6|A0A2I3BPN6_MOUSE TATA-box-binding protein-associated factor 4 OS=Mus musculus OX=10090 GN=Taf4 PE=1 SV=1;tr|E9QAP7|E9QAP7_MOUSE TATA-box-binding protein-associated factor 4 OS=Mus musculus OX=10090 GN=Taf4 PE=1 SV=1	2	1	1	1	1	1	1	1	1	1	1	1	1	1	1	1	1	1	1	1	1	1	1.4	1.4	1.4	104.16	1030	1030;1042	0	6.3766	By matching	By MS/MS	By MS/MS	By matching	By matching	By matching	1.4	1.4	1.4	1.4	1.4	1.4
A0A2I3BPP1;Q3UHB2;A0A2I3BRT5;Q7TT21;Q61037;A0A2I3BPE9;A0A2I3BPR7;Q3TQ10	A0A2I3BPP1;Q3UHB2;A0A2I3BRT5;Q7TT21;Q61037;A0A2I3BPE9	10;10;9;9;9;7;2;1	10;10;9;9;9;7;2;1	10;10;9;9;9;7;2;1	Tuberin	Tsc2	tr|A0A2I3BPP1|A0A2I3BPP1_MOUSE Tuberin OS=Mus musculus OX=10090 GN=Tsc2 PE=1 SV=1;tr|Q3UHB2|Q3UHB2_MOUSE Tuberin OS=Mus musculus OX=10090 GN=Tsc2 PE=1 SV=1;tr|A0A2I3BRT5|A0A2I3BRT5_MOUSE Tuberin OS=Mus musculus OX=10090 GN=Tsc2 PE=1 SV=1;tr|Q7TT21|Q7TT21_M	8	10	10	10	2	2	3	7	8	10	2	2	3	7	8	10	2	2	3	7	8	10	5.5	5.5	5.5	198.85	1785	1785;1808;1741;1742;1814;1359;97;237	0	109.08	By matching	By matching	By MS/MS	By MS/MS	By MS/MS	By MS/MS	1.5	1.5	2.1	3.6	4.3	5.5
D3YXN6;A0A2I3BQ03;P63101;D3YXF4;D3YW45	D3YXN6;A0A2I3BQ03;P63101;D3YXF4;D3YW45	4;4;4;3;2	2;2;2;2;1	2;2;2;2;1	14-3-3 protein zeta/delta	Ywhaz	tr|D3YXN6|D3YXN6_MOUSE 14-3-3 protein zeta/delta (Fragment) OS=Mus musculus OX=10090 GN=Ywhaz PE=1 SV=1;tr|A0A2I3BQ03|A0A2I3BQ03_MOUSE 14-3-3 protein zeta/delta (Fragment) OS=Mus musculus OX=10090 GN=Ywhaz PE=1 SV=1;sp|P63101|1433Z_MOUSE 14-3-3 protein zet	5	4	2	2	4	4	4	3	4	4	2	2	2	1	2	2	2	2	2	1	2	2	43.2	26.1	26.1	10.098	88	88;166;245;44;26	0	27.665	By MS/MS	By MS/MS	By MS/MS	By matching	By MS/MS	By MS/MS	43.2	43.2	43.2	27.3	43.2	43.2
A0A2I3BRG1;Q8BKI2	A0A2I3BRG1;Q8BKI2	2;2	2;2	2;2	Trinucleotide repeat-containing gene 6B protein	Tnrc6b	tr|A0A2I3BRG1|A0A2I3BRG1_MOUSE Trinucleotide repeat-containing gene 6B protein (Fragment) OS=Mus musculus OX=10090 GN=Tnrc6b PE=1 SV=1;sp|Q8BKI2|TNR6B_MOUSE Trinucleotide repeat-containing gene 6B protein OS=Mus musculus OX=10090 GN=Tnrc6b PE=1 SV=2	2	2	2	2	2	2	2	2	2	2	2	2	2	2	2	2	2	2	2	2	2	2	2.3	2.3	2.3	102.16	958	958;1810	0	13.5	By MS/MS	By MS/MS	By MS/MS	By matching	By MS/MS	By MS/MS	2.3	2.3	2.3	2.3	2.3	2.3
A0A2I3BRL8;Q91VM5;Q9WV02;A2AFI4;A2AFI3;A0A2I3BQC0;S4R1F6	A0A2I3BRL8;Q91VM5;Q9WV02;A2AFI4;A2AFI3	5;5;5;3;3;2;2	5;5;5;3;3;2;2	5;5;5;3;3;2;2	RNA binding motif protein, X-linked-like-1;RNA-binding motif protein, X chromosome;RNA-binding motif protein, X chromosome, N-terminally processed	Rbmxl1;Rbmx	tr|A0A2I3BRL8|A0A2I3BRL8_MOUSE Predicted gene 7324 OS=Mus musculus OX=10090 GN=Gm7324 PE=4 SV=1;sp|Q91VM5|RMXL1_MOUSE RNA binding motif protein, X-linked-like-1 OS=Mus musculus OX=10090 GN=Rbmxl1 PE=2 SV=1;sp|Q9WV02|RBMX_MOUSE RNA-binding motif protein, X	7	5	5	5	3	5	3	4	4	3	3	5	3	4	4	3	3	5	3	4	4	3	13.1	13.1	13.1	42.178	388	388;388;391;103;301;30;263	0	28.906	By matching	By MS/MS	By MS/MS	By matching	By MS/MS	By MS/MS	7.5	13.1	7.5	9.5	9.5	7.5
A0A2R8VHE4;E9PWY6;O88986	A0A2R8VHE4;E9PWY6;O88986	1;1;1	1;1;1	1;1;1	2-amino-3-ketobutyrate coenzyme A ligase, mitochondrial	Gcat	tr|A0A2R8VHE4|A0A2R8VHE4_MOUSE 2-amino-3-ketobutyrate coenzyme A ligase, mitochondrial (Fragment) OS=Mus musculus OX=10090 GN=Gcat PE=1 SV=1;tr|E9PWY6|E9PWY6_MOUSE 2-amino-3-ketobutyrate coenzyme A ligase, mitochondrial OS=Mus musculus OX=10090 GN=Gcat PE=	3	1	1	1	1	1	1	0	0	0	1	1	1	0	0	0	1	1	1	0	0	0	4.4	4.4	4.4	24.308	227	227;382;416	0	7.1365	By matching	By MS/MS	By MS/MS				4.4	4.4	4.4	0	0	0
A0A2R8VHK9;P46061;A0A2R8W753	A0A2R8VHK9;P46061;A0A2R8W753	2;2;1	2;2;1	2;2;1	Ran GTPase-activating protein 1	Rangap1	tr|A0A2R8VHK9|A0A2R8VHK9_MOUSE Ran GTPase-activating protein 1 (Fragment) OS=Mus musculus OX=10090 GN=Rangap1 PE=1 SV=1;sp|P46061|RAGP1_MOUSE Ran GTPase-activating protein 1 OS=Mus musculus OX=10090 GN=Rangap1 PE=1 SV=2;tr|A0A2R8W753|A0A2R8W753_MOUSE Ran G	3	2	2	2	1	1	2	0	1	1	1	1	2	0	1	1	1	1	2	0	1	1	9.3	9.3	9.3	27.117	257	257;589;144	0	15.633	By matching	By matching	By MS/MS		By matching	By matching	4.7	4.7	9.3	0	4.7	4.7
A0A2R8VHM9;Q921I9	A0A2R8VHM9;Q921I9	1;1	1;1	1;1	Exosome complex component RRP41	Exosc4	tr|A0A2R8VHM9|A0A2R8VHM9_MOUSE Exosome complex component RRP41 OS=Mus musculus OX=10090 GN=Exosc4 PE=1 SV=1;sp|Q921I9|EXOS4_MOUSE Exosome complex component RRP41 OS=Mus musculus OX=10090 GN=Exosc4 PE=1 SV=3	2	1	1	1	1	1	1	0	1	1	1	1	1	0	1	1	1	1	1	0	1	1	17.6	17.6	17.6	7.171	68	68;245	0.0033822	6.0807	By matching	By MS/MS	By MS/MS		By matching	By matching	17.6	17.6	17.6	0	17.6	17.6
A0A2R8VI25;Q3TT81;A0A2R8VHP9;B2M1R7;Q61990;A0A2R8W6U6;A0A2R8VI92;A0A2R8W6H3	A0A2R8VI25;Q3TT81;A0A2R8VHP9;B2M1R7;Q61990;A0A2R8W6U6;A0A2R8VI92;A0A2R8W6H3	4;4;4;4;4;3;2;2	1;1;1;1;1;1;1;1	1;1;1;1;1;1;1;1	Poly(rC)-binding protein 2	Pcbp2	tr|A0A2R8VI25|A0A2R8VI25_MOUSE Poly(RC) binding protein 2, isoform CRA_d OS=Mus musculus OX=10090 GN=Pcbp2 PE=1 SV=1;tr|Q3TT81|Q3TT81_MOUSE Poly(rC)-binding protein 2 OS=Mus musculus OX=10090 GN=Pcbp2 PE=2 SV=1;tr|A0A2R8VHP9|A0A2R8VHP9_MOUSE Poly(rC)-bindi	8	4	1	1	4	4	4	3	4	4	1	1	1	1	1	1	1	1	1	1	1	1	14.9	3.5	3.5	33.299	316	316;322;335;361;362;265;181;184	0	8.3647	By MS/MS	By MS/MS	By MS/MS	By matching	By MS/MS	By MS/MS	14.9	14.9	14.9	8.5	14.9	14.9
A0A2R8VHT7;Q8R3F5	A0A2R8VHT7;Q8R3F5	1;1	1;1	1;1	Malonyl-CoA-acyl carrier protein transacylase, mitochondrial	Mcat	tr|A0A2R8VHT7|A0A2R8VHT7_MOUSE Malonyl-CoA-acyl carrier protein transacylase, mitochondrial (Fragment) OS=Mus musculus OX=10090 GN=Mcat PE=1 SV=1;sp|Q8R3F5|FABD_MOUSE Malonyl-CoA-acyl carrier protein transacylase, mitochondrial OS=Mus musculus OX=10090 GN=	2	1	1	1	1	1	1	1	0	0	1	1	1	1	0	0	1	1	1	1	0	0	11.6	11.6	11.6	13.817	129	129;381	0	14.216	By MS/MS	By MS/MS	By MS/MS	By matching			11.6	11.6	11.6	11.6	0	0
A0A2R8VJY7;A0A2R8VJN7;A0A2R8W6T4;A0A2R8W6M8;Q8K1N4	A0A2R8VJY7;A0A2R8VJN7;A0A2R8W6T4;A0A2R8W6M8;Q8K1N4	1;1;1;1;1	1;1;1;1;1	1;1;1;1;1	Spermatogenesis-associated serine-rich protein 2	Spats2	tr|A0A2R8VJY7|A0A2R8VJY7_MOUSE Spermatogenesis-associated serine-rich protein 2 (Fragment) OS=Mus musculus OX=10090 GN=Spats2 PE=1 SV=1;tr|A0A2R8VJN7|A0A2R8VJN7_MOUSE Spermatogenesis-associated serine-rich protein 2 (Fragment) OS=Mus musculus OX=10090 GN=S	5	1	1	1	1	1	1	0	0	1	1	1	1	0	0	1	1	1	1	0	0	1	8.8	8.8	8.8	17.298	160	160;160;200;255;545	0.0022883	6.1276	By MS/MS	By MS/MS	By matching			By matching	8.8	8.8	8.8	0	0	8.8
A0A2R8VK76;Q9EPU4	A0A2R8VK76;Q9EPU4	1;1	1;1	1;1	Cleavage and polyadenylation specificity factor subunit 1	Cpsf1	tr|A0A2R8VK76|A0A2R8VK76_MOUSE Cleavage and polyadenylation-specificity factor subunit 1 OS=Mus musculus OX=10090 GN=Cpsf1 PE=1 SV=1;sp|Q9EPU4|CPSF1_MOUSE Cleavage and polyadenylation specificity factor subunit 1 OS=Mus musculus OX=10090 GN=Cpsf1 PE=1 SV=1	2	1	1	1	1	1	1	0	1	1	1	1	1	0	1	1	1	1	1	0	1	1	1.2	1.2	1.2	161.77	1450	1450;1441	0.0034208	6.1135	By matching	By MS/MS	By matching		By matching	By matching	1.2	1.2	1.2	0	1.2	1.2
A0A2R8W6R3;P62878	A0A2R8W6R3;P62878	2;2	2;2	2;2	E3 ubiquitin-protein ligase RBX1;E3 ubiquitin-protein ligase RBX1, N-terminally processed	Rbx1	tr|A0A2R8W6R3|A0A2R8W6R3_MOUSE E3 ubiquitin-protein ligase RBX1 OS=Mus musculus OX=10090 GN=Rbx1 PE=1 SV=1;sp|P62878|RBX1_MOUSE E3 ubiquitin-protein ligase RBX1 OS=Mus musculus OX=10090 GN=Rbx1 PE=1 SV=1	2	2	2	2	2	2	2	1	0	2	2	2	2	1	0	2	2	2	2	1	0	2	22.9	22.9	22.9	9.1173	83	83;108	0	33.994	By MS/MS	By MS/MS	By MS/MS	By matching		By MS/MS	22.9	22.9	22.9	21.7	0	22.9
A0A2R8W6Z1;O08582	A0A2R8W6Z1;O08582	1;1	1;1	1;1	GTP-binding protein 1	Gtpbp1	tr|A0A2R8W6Z1|A0A2R8W6Z1_MOUSE GTP-binding protein 1 (Fragment) OS=Mus musculus OX=10090 GN=Gtpbp1 PE=1 SV=1;sp|O08582|GTPB1_MOUSE GTP-binding protein 1 OS=Mus musculus OX=10090 GN=Gtpbp1 PE=1 SV=2	2	1	1	1	1	1	1	0	1	1	1	1	1	0	1	1	1	1	1	0	1	1	7.6	7.6	7.6	15.924	145	145;668	0	7.97	By MS/MS	By MS/MS	By MS/MS		By matching	By matching	7.6	7.6	7.6	0	7.6	7.6
A2A547;P84099	A2A547;P84099	2;2	2;2	2;2	Ribosomal protein L19;60S ribosomal protein L19	Rpl19	tr|A2A547|A2A547_MOUSE Ribosomal protein L19 OS=Mus musculus OX=10090 GN=Rpl19 PE=1 SV=1;sp|P84099|RL19_MOUSE 60S ribosomal protein L19 OS=Mus musculus OX=10090 GN=Rpl19 PE=1 SV=1	2	2	2	2	2	2	2	1	2	2	2	2	2	1	2	2	2	2	2	1	2	2	5.2	5.2	5.2	23.247	194	194;196	0	15.314	By MS/MS	By MS/MS	By MS/MS	By matching	By MS/MS	By MS/MS	5.2	5.2	5.2	4.6	5.2	5.2
A2A5K2;P55065	A2A5K2;P55065	1;1	1;1	1;1	Phospholipid transfer protein	Pltp	tr|A2A5K2|A2A5K2_MOUSE Phospholipid transfer protein OS=Mus musculus OX=10090 GN=Pltp PE=1 SV=1;sp|P55065|PLTP_MOUSE Phospholipid transfer protein OS=Mus musculus OX=10090 GN=Pltp PE=1 SV=1	2	1	1	1	0	0	1	0	0	0	0	0	1	0	0	0	0	0	1	0	0	0	2.3	2.3	2.3	49.022	441	441;493	0	6.5664			By MS/MS				0	0	2.3	0	0	0
A2A5N1;Q9CQV8	A2A5N1;Q9CQV8	4;4	1;1	1;1	14-3-3 protein beta/alpha;14-3-3 protein beta/alpha, N-terminally processed	Ywhab	tr|A2A5N1|A2A5N1_MOUSE 14-3-3 protein beta/alpha (Fragment) OS=Mus musculus OX=10090 GN=Ywhab PE=1 SV=1;sp|Q9CQV8|1433B_MOUSE 14-3-3 protein beta/alpha OS=Mus musculus OX=10090 GN=Ywhab PE=1 SV=3	2	4	1	1	3	4	3	3	4	3	0	1	0	1	1	1	0	1	0	1	1	1	23.9	8.8	8.8	18.348	159	159;246	0	6.2766	By matching	By MS/MS	By matching	By matching	By MS/MS	By MS/MS	15.1	23.9	15.1	18.2	23.9	18.2
V9GX87;A2A5R8;Q9DBE7;A2A5S3;Q9Z108	V9GX87;A2A5R8;Q9DBE7;A2A5S3;Q9Z108	1;1;1;1;1	1;1;1;1;1	1;1;1;1;1	Double-stranded RNA-binding protein Staufen homolog 1	Stau1	tr|V9GX87|V9GX87_MOUSE Double-stranded RNA-binding protein Staufen homolog 1 OS=Mus musculus OX=10090 GN=Stau1 PE=1 SV=1;tr|A2A5R8|A2A5R8_MOUSE Double-stranded RNA-binding protein Staufen homolog 1 OS=Mus musculus OX=10090 GN=Stau1 PE=1 SV=1;tr|Q9DBE7|Q9DB	5	1	1	1	1	1	1	1	1	1	1	1	1	1	1	1	1	1	1	1	1	1	1.8	1.8	1.8	48.778	436	436;485;489;495;487	0	6.5009	By MS/MS	By matching	By MS/MS	By matching	By matching	By matching	1.8	1.8	1.8	1.8	1.8	1.8
A2A6U3;Q80UG5;A2A6U5	A2A6U3;Q80UG5;A2A6U5	2;2;1	2;2;1	2;2;1	Septin-9	2022-09-09	tr|A2A6U3|A2A6U3_MOUSE Septin-9 OS=Mus musculus OX=10090 GN=Sept9 PE=1 SV=1;sp|Q80UG5|SEPT9_MOUSE Septin-9 OS=Mus musculus OX=10090 GN=Sept9 PE=1 SV=1;tr|A2A6U5|A2A6U5_MOUSE Septin-9 (Fragment) OS=Mus musculus OX=10090 GN=Sept9 PE=1 SV=1	3	2	2	2	2	2	2	0	1	1	2	2	2	0	1	1	2	2	2	0	1	1	3.9	3.9	3.9	63.772	565	565;583;242	0	11.932	By MS/MS	By MS/MS	By MS/MS		By matching	By matching	3.9	3.9	3.9	0	1.6	1.6
F6VYE2;A2A791	F6VYE2;A2A791	1;1	1;1	1;1	Zinc finger MYM-type protein 4	Zmym4	tr|F6VYE2|F6VYE2_MOUSE Zinc finger MYM-type protein 4 (Fragment) OS=Mus musculus OX=10090 GN=Zmym4 PE=1 SV=1;sp|A2A791|ZMYM4_MOUSE Zinc finger MYM-type protein 4 OS=Mus musculus OX=10090 GN=Zmym4 PE=1 SV=1	2	1	1	1	1	1	1	0	0	0	1	1	1	0	0	0	1	1	1	0	0	0	0.9	0.9	0.9	134.2	1209	1209;1549	0.0054054	5.9784	By matching	By MS/MS	By MS/MS				0.9	0.9	0.9	0	0	0
A2A7U9;A2A7I1;A2A799;A2A9J5;A2AWF2;A2A7V0	A2A7U9;A2A7I1;A2A799;A2A9J5;A2AWF2;A2A7V0	1;1;1;1;1;1	1;1;1;1;1;1	1;1;1;1;1;1		Zfp600;Gm13145;2610305D13Rik;Gm13242;Rex2	tr|A2A7U9|A2A7U9_MOUSE Zinc finger protein 600 (Fragment) OS=Mus musculus OX=10090 GN=Zfp600 PE=4 SV=1;tr|A2A7I1|A2A7I1_MOUSE Zinc finger protein 978 (Fragment) OS=Mus musculus OX=10090 GN=Zfp978 PE=1 SV=8;tr|A2A799|A2A799_MOUSE Zinc finger protein 979 OS=	6	1	1	1	1	1	1	0	0	0	1	1	1	0	0	0	1	1	1	0	0	0	8.1	8.1	8.1	15.845	135	135;335;407;645;685;737	0.0033595	6.0586	By matching	By MS/MS	By MS/MS				8.1	8.1	8.1	0	0	0
A2A7S7;Q91WQ3	A2A7S7;Q91WQ3	2;2	2;2	2;2	Tyrosine--tRNA ligase;Tyrosine--tRNA ligase, cytoplasmic;Tyrosine--tRNA ligase, cytoplasmic, N-terminally processed	Yars	tr|A2A7S7|A2A7S7_MOUSE Tyrosine--tRNA ligase OS=Mus musculus OX=10090 GN=Yars PE=1 SV=1;sp|Q91WQ3|SYYC_MOUSE Tyrosine--tRNA ligase, cytoplasmic OS=Mus musculus OX=10090 GN=Yars PE=1 SV=3	2	2	2	2	2	1	2	0	1	2	2	1	2	0	1	2	2	1	2	0	1	2	3.5	3.5	3.5	63.001	564	564;528	0	11.525	By MS/MS	By matching	By MS/MS		By MS/MS	By matching	3.5	1.6	3.5	0	2	3.5
A2A813;Q99LX0;A2A817;A2A816;A2A815	A2A813;Q99LX0;A2A817;A2A816;A2A815	2;2;1;1;1	2;2;1;1;1	2;2;1;1;1	Protein deglycase DJ-1	Park7	tr|A2A813|A2A813_MOUSE Protein/nucleic acid deglycase DJ-1 OS=Mus musculus OX=10090 GN=Park7 PE=1 SV=1;sp|Q99LX0|PARK7_MOUSE Protein/nucleic acid deglycase DJ-1 OS=Mus musculus OX=10090 GN=Park7 PE=1 SV=1;tr|A2A817|A2A817_MOUSE Protein/nucleic acid deglyca	5	2	2	2	2	2	2	2	2	2	2	2	2	2	2	2	2	2	2	2	2	2	8.6	8.6	8.6	18.474	175	175;189;84;125;135	0	11.119	By MS/MS	By MS/MS	By MS/MS	By matching	By matching	By matching	8.6	8.6	8.6	8.6	8.6	8.6
Z4YLK3;A2A870	Z4YLK3;A2A870	1;1	1;1	1;1	Fas-binding factor 1	Fbf1	tr|Z4YLK3|Z4YLK3_MOUSE Fas-binding factor 1 (Fragment) OS=Mus musculus OX=10090 GN=Fbf1 PE=4 SV=1;sp|A2A870|FBF1_MOUSE Fas-binding factor 1 OS=Mus musculus OX=10090 GN=Fbf1 PE=1 SV=1	2	1	1	1	1	0	0	0	0	1	1	0	0	0	0	1	1	0	0	0	0	1	3.5	3.5	3.5	23.908	227	227;1173	0	6.3832	By MS/MS					By MS/MS	3.5	0	0	0	0	3.5
A2A8U2	A2A8U2	1	1	1	Transmembrane protein 201	Tmem201	sp|A2A8U2|TM201_MOUSE Transmembrane protein 201 OS=Mus musculus OX=10090 GN=Tmem201 PE=1 SV=1	1	1	1	1	0	1	0	0	0	0	0	1	0	0	0	0	0	1	0	0	0	0	2.3	2.3	2.3	72.499	664	664	0	6.4087		By MS/MS					0	2.3	0	0	0	0
A2A8V8;A2A8V9;E9PUK6;Q52KI8;E9QKA4	A2A8V8;A2A8V9;E9PUK6;Q52KI8;E9QKA4	2;2;2;2;1	2;2;2;2;1	2;2;2;2;1	Serine/arginine repetitive matrix protein 1	Srrm1	tr|A2A8V8|A2A8V8_MOUSE Serine/arginine repetitive matrix protein 1 OS=Mus musculus OX=10090 GN=Srrm1 PE=1 SV=1;tr|A2A8V9|A2A8V9_MOUSE Serine/arginine repetitive matrix protein 1 OS=Mus musculus OX=10090 GN=Srrm1 PE=1 SV=1;tr|E9PUK6|E9PUK6_MOUSE Serine/argi	5	2	2	2	1	1	1	0	1	1	1	1	1	0	1	1	1	1	1	0	1	1	3	3	3	102.66	909	909;918;923;946;897	0	14.677	By matching	By matching	By MS/MS		By MS/MS	By matching	1.9	1.9	1.9	0	1.1	1.9
A2ACG7;Q9DBG6	A2ACG7;Q9DBG6	2;2	2;2	2;2	Dolichyl-diphosphooligosaccharide--protein glycosyltransferase subunit 2	Rpn2	tr|A2ACG7|A2ACG7_MOUSE Dolichyl-diphosphooligosaccharide--protein glycosyltransferase subunit 2 OS=Mus musculus OX=10090 GN=Rpn2 PE=1 SV=1;sp|Q9DBG6|RPN2_MOUSE Dolichyl-diphosphooligosaccharide--protein glycosyltransferase subunit 2 OS=Mus musculus OX=1009	2	2	2	2	2	2	2	0	2	1	2	2	2	0	2	1	2	2	2	0	2	1	3.6	3.6	3.6	67.501	615	615;631	0	11.082	By matching	By MS/MS	By MS/MS		By matching	By matching	3.6	3.6	3.6	0	3.6	2.3
A2AFI6	A2AFI6	2	2	2		Gm364	tr|A2AFI6|A2AFI6_MOUSE Transmembrane 9 superfamily member OS=Mus musculus OX=10090 GN=Gm364 PE=1 SV=1	1	2	2	2	2	2	2	2	2	2	2	2	2	2	2	2	2	2	2	2	2	2	3.1	3.1	3.1	77.299	671	671	0	13.251	By MS/MS	By MS/MS	By MS/MS	By matching	By matching	By matching	3.1	3.1	3.1	3.1	3.1	3.1
A2AFI9;A2AFJ1;Q60973;F6ZLC6	A2AFI9;A2AFJ1;Q60973	3;3;3;1	3;3;3;1	3;3;3;1	Histone-binding protein RBBP7	Rbbp7	tr|A2AFI9|A2AFI9_MOUSE Histone-binding protein RBBP7 OS=Mus musculus OX=10090 GN=Rbbp7 PE=1 SV=1;tr|A2AFJ1|A2AFJ1_MOUSE Histone-binding protein RBBP7 OS=Mus musculus OX=10090 GN=Rbbp7 PE=1 SV=1;sp|Q60973|RBBP7_MOUSE Histone-binding protein RBBP7 OS=Mus mus	4	3	3	3	2	3	3	2	3	2	2	3	3	2	3	2	2	3	3	2	3	2	6.5	6.5	6.5	43.595	386	386;416;425;235	0	21.122	By MS/MS	By MS/MS	By MS/MS	By matching	By MS/MS	By MS/MS	5.7	6.5	6.5	6.5	6.5	5.7
A2AFK7;Q91VC3	A2AFK7;Q91VC3	1;1	1;1	1;1	Eukaryotic initiation factor 4A-III;Eukaryotic initiation factor 4A-III, N-terminally processed	Eif4a3	tr|A2AFK7|A2AFK7_MOUSE Eukaryotic initiation factor 4A-III (Fragment) OS=Mus musculus OX=10090 GN=Eif4a3 PE=1 SV=1;sp|Q91VC3|IF4A3_MOUSE Eukaryotic initiation factor 4A-III OS=Mus musculus OX=10090 GN=Eif4a3 PE=1 SV=3	2	1	1	1	1	1	1	1	1	1	1	1	1	1	1	1	1	1	1	1	1	1	4.3	4.3	4.3	33.958	299	299;411	0	10.92	By MS/MS	By MS/MS	By MS/MS	By matching	By MS/MS	By MS/MS	4.3	4.3	4.3	4.3	4.3	4.3
A2AFQ0;Q7TMY8;F6XP90;F6UYC1	A2AFQ0;Q7TMY8	8;8;2;1	8;8;2;1	8;8;2;1	E3 ubiquitin-protein ligase HUWE1	Huwe1	tr|A2AFQ0|A2AFQ0_MOUSE E3 ubiquitin-protein ligase HUWE1 OS=Mus musculus OX=10090 GN=Huwe1 PE=1 SV=1;sp|Q7TMY8|HUWE1_MOUSE E3 ubiquitin-protein ligase HUWE1 OS=Mus musculus OX=10090 GN=Huwe1 PE=1 SV=5	4	8	8	8	7	8	7	3	4	5	7	8	7	3	4	5	7	8	7	3	4	5	2.6	2.6	2.6	482.69	4378	4378;4377;1176;150	0	70.851	By MS/MS	By MS/MS	By MS/MS	By matching	By matching	By MS/MS	2.3	2.6	2.3	0.9	1.3	1.5
A2AFQ9;E9PUU4;Q8BX17	A2AFQ9;E9PUU4;Q8BX17	1;1;1	1;1;1	1;1;1	Gem-associated protein 5	Gemin5	tr|A2AFQ9|A2AFQ9_MOUSE Gem-associated protein 5 OS=Mus musculus OX=10090 GN=Gemin5 PE=1 SV=1;tr|E9PUU4|E9PUU4_MOUSE Gem-associated protein 5 OS=Mus musculus OX=10090 GN=Gemin5 PE=1 SV=1;sp|Q8BX17|GEMI5_MOUSE Gem-associated protein 5 OS=Mus musculus OX=1009	3	1	1	1	0	0	1	0	1	0	0	0	1	0	1	0	0	0	1	0	1	0	0.7	0.7	0.7	166.52	1501	1501;1503;1502	0.0082816	5.8699			By MS/MS		By matching		0	0	0.7	0	0.7	0
A2AH22	A2AH22	6	6	6	Activating molecule in BECN1-regulated autophagy protein 1	Ambra1	sp|A2AH22|AMRA1_MOUSE Activating molecule in BECN1-regulated autophagy protein 1 OS=Mus musculus OX=10090 GN=Ambra1 PE=1 SV=1	1	6	6	6	5	5	4	0	0	0	5	5	4	0	0	0	5	5	4	0	0	0	5.7	5.7	5.7	142.88	1300	1300	0	53.759	By MS/MS	By MS/MS	By MS/MS				4.7	4.8	3.8	0	0	0
E9QAT4;A2AIX1;F7BPW6	E9QAT4;A2AIX1;F7BPW6	4;4;3	4;4;3	4;4;3		Sec16a	tr|E9QAT4|E9QAT4_MOUSE Protein transport protein sec16 OS=Mus musculus OX=10090 GN=Sec16a PE=1 SV=1;tr|A2AIX1|A2AIX1_MOUSE Protein transport protein sec16 OS=Mus musculus OX=10090 GN=Sec16a PE=1 SV=1;tr|F7BPW6|F7BPW6_MOUSE Protein transport protein sec16 (	3	4	4	4	2	3	4	1	2	2	2	3	4	1	2	2	2	3	4	1	2	2	1.7	1.7	1.7	254.2	2357	2357;2377;907	0	23.297	By MS/MS	By MS/MS	By MS/MS	By matching	By matching	By matching	0.9	1.4	1.7	0.3	0.8	0.9
A2AJ72;Q3TIX6;A0A0A6YX76;A2AJ71;A0A0A6YY39	A2AJ72;Q3TIX6;A0A0A6YX76;A2AJ71;A0A0A6YY39	2;2;1;1;1	1;1;1;1;1	1;1;1;1;1		Fubp3	tr|A2AJ72|A2AJ72_MOUSE Far upstream element (FUSE)-binding protein 3 OS=Mus musculus OX=10090 GN=Fubp3 PE=1 SV=1;tr|Q3TIX6|Q3TIX6_MOUSE Far upstream element (FUSE)-binding protein 3 OS=Mus musculus OX=10090 GN=Fubp3 PE=1 SV=1;tr|A0A0A6YX76|A0A0A6YX76_MOUSE	5	2	1	1	1	2	1	0	0	1	0	1	1	0	0	0	0	1	1	0	0	0	3.9	2.5	2.5	61.447	569	569;575;83;97;123	0	7.3856	By matching	By matching	By MS/MS			By matching	1.4	3.9	2.5	0	0	1.4
A2AJI1;A8Y5P4;A2AJI0;F6WF36	A2AJI1;A8Y5P4;A2AJI0;F6WF36	3;3;3;2	3;3;3;2	3;3;3;2	MAP7 domain-containing protein 1	Map7d1	tr|A2AJI1|A2AJI1_MOUSE MAP7 domain-containing protein 1 OS=Mus musculus OX=10090 GN=Map7d1 PE=1 SV=1;tr|A8Y5P4|A8Y5P4_MOUSE MAP7 domain-containing protein 1 OS=Mus musculus OX=10090 GN=Map7d1 PE=1 SV=1;sp|A2AJI0|MA7D1_MOUSE MAP7 domain-containing protein 1	4	3	3	3	3	2	3	2	1	3	3	2	3	2	1	3	3	2	3	2	1	3	4.8	4.8	4.8	85.763	774	774;814;846;591	0	20.197	By MS/MS	By matching	By MS/MS	By matching	By matching	By matching	4.8	3.1	4.8	3.5	1.3	4.8
L7N236;A2AJU2;Q62012;L7MU67;B1B0X0;B1AZM2;B1AVZ5;B1AV09;A2BI02	L7N236;A2AJU2;Q62012;L7MU67;B1B0X0;B1AZM2;B1AVZ5;B1AV09;A2BI02	1;1;1;1;1;1;1;1;1	1;1;1;1;1;1;1;1;1	1;1;1;1;1;1;1;1;1		Gm15127;Gm10439;Ott;Gm15097;Gm15107;Gm15091;Luzp4;Gm15080	tr|L7N236|L7N236_MOUSE Uncharacterized protein OS=Mus musculus OX=10090 GN=Gm15127 PE=4 SV=1;tr|A2AJU2|A2AJU2_MOUSE Uncharacterized protein OS=Mus musculus OX=10090 GN=Gm10439 PE=4 SV=1;tr|Q62012|Q62012_MOUSE Ott protein OS=Mus musculus OX=10090 GN=Gm15085	9	1	1	1	1	1	1	1	0	1	1	1	1	1	0	1	1	1	1	1	0	1	1.8	1.8	1.8	50.972	433	433;433;449;449;449;449;449;449;449	0	6.3793	By MS/MS	By MS/MS	By MS/MS	By matching		By matching	1.8	1.8	1.8	1.8	0	1.8
Q8C2Q8;A2AKU9;Q91VR2;A2AKV2;A2AKV3;A2AKV1;A2AKV0	Q8C2Q8;A2AKU9;Q91VR2;A2AKV2;A2AKV3;A2AKV1	8;8;8;6;6;5;3	8;8;8;6;6;5;3	8;8;8;6;6;5;3	ATP synthase subunit gamma;ATP synthase subunit gamma, mitochondrial	Atp5c1	tr|Q8C2Q8|Q8C2Q8_MOUSE ATP synthase subunit gamma OS=Mus musculus OX=10090 GN=Atp5c1 PE=1 SV=1;tr|A2AKU9|A2AKU9_MOUSE ATP synthase subunit gamma OS=Mus musculus OX=10090 GN=Atp5c1 PE=1 SV=1;sp|Q91VR2|ATPG_MOUSE ATP synthase subunit gamma, mitochondrial OS=	7	8	8	8	7	8	6	3	4	6	7	8	6	3	4	6	7	8	6	3	4	6	37.2	37.2	37.2	30.255	274	274;297;298;171;188;154;101	0	62.543	By MS/MS	By MS/MS	By MS/MS	By matching	By matching	By matching	32.8	37.2	29.2	19	21.9	21.5
A2AL77;Q9CR06;A2AL78;A2AL76	A2AL77;Q9CR06;A2AL78;A2AL76	1;1;1;1	1;1;1;1	1;1;1;1		Asph	tr|A2AL77|A2AL77_MOUSE Aspartyl/asparaginyl beta-hydroxylase (Fragment) OS=Mus musculus OX=10090 GN=Asph PE=1 SV=1;tr|Q9CR06|Q9CR06_MOUSE Aspartate-beta-hydroxylase, isoform CRA_a OS=Mus musculus OX=10090 GN=Asph PE=1 SV=1;tr|A2AL78|A2AL78_MOUSE Aspartyl/a	4	1	1	1	1	1	1	0	0	0	1	1	1	0	0	0	1	1	1	0	0	0	7.4	7.4	7.4	16.367	149	149;207;245;261	0	7.3516	By MS/MS	By MS/MS	By matching				7.4	7.4	7.4	0	0	0
Q8CBM2;A2AL85;Q8BSY0	Q8CBM2;A2AL85;Q8BSY0	2;2;2	2;2;2	2;2;2	Aspartyl/asparaginyl beta-hydroxylase	Asph	tr|Q8CBM2|Q8CBM2_MOUSE Aspartyl/asparaginyl beta-hydroxylase OS=Mus musculus OX=10090 GN=Asph PE=1 SV=1;tr|A2AL85|A2AL85_MOUSE Aspartyl/asparaginyl beta-hydroxylase OS=Mus musculus OX=10090 GN=Asph PE=1 SV=1;sp|Q8BSY0|ASPH_MOUSE Aspartyl/asparaginyl beta-h	3	2	2	2	2	2	2	1	2	2	2	2	2	1	2	2	2	2	2	1	2	2	2.6	2.6	2.6	75.127	658	658;725;741	0	11.618	By MS/MS	By matching	By MS/MS	By matching	By matching	By matching	2.6	2.6	2.6	1.2	2.6	2.6
A2ANA0;Q9D662	A2ANA0;Q9D662	1;1	1;1	1;1	Protein transport protein Sec23B	Sec23b	tr|A2ANA0|A2ANA0_MOUSE Protein transport protein Sec23B (Fragment) OS=Mus musculus OX=10090 GN=Sec23b PE=1 SV=1;sp|Q9D662|SC23B_MOUSE Protein transport protein Sec23B OS=Mus musculus OX=10090 GN=Sec23b PE=1 SV=1	2	1	1	1	0	0	1	0	1	1	0	0	1	0	1	1	0	0	1	0	1	1	4.7	4.7	4.7	31.44	278	278;767	0	6.2994			By matching		By MS/MS	By MS/MS	0	0	4.7	0	4.7	4.7
V9GXB9;G3UYY0;V9GXL3;Q9D4Y3;A2AWL9;A2ANE0	V9GXB9;G3UYY0;V9GXL3;Q9D4Y3;A2AWL9;A2ANE0	1;1;1;1;1;1	1;1;1;1;1;1	1;1;1;1;1;1		Rhox2c;Rhox2a;Rhox2e;Rhox2f	tr|V9GXB9|V9GXB9_MOUSE Reproductive homeobox 2C OS=Mus musculus OX=10090 GN=Rhox2c PE=4 SV=1;tr|G3UYY0|G3UYY0_MOUSE Reproductive homeobox 2A OS=Mus musculus OX=10090 GN=Rhox2a PE=4 SV=1;tr|V9GXL3|V9GXL3_MOUSE Reproductive homeobox 2E (Fragment) OS=Mus musc	6	1	1	1	1	1	1	0	0	1	1	1	1	0	0	1	1	1	1	0	0	1	7.7	7.7	7.7	19.86	183	183;183;191;191;191;191	0	7.2331	By MS/MS	By MS/MS	By MS/MS			By matching	7.7	7.7	7.7	0	0	7.7
A2ANY6	A2ANY6	1	1	1		Mdn1	tr|A2ANY6|A2ANY6_MOUSE Midasin OS=Mus musculus OX=10090 GN=Mdn1 PE=1 SV=1	1	1	1	1	0	1	1	0	0	0	0	1	1	0	0	0	0	1	1	0	0	0	0.3	0.3	0.3	630.33	5589	5589	0.0011561	6.1527		By matching	By MS/MS				0	0.3	0.3	0	0	0
Q3U8S1;A2APM5;A2APM3;A2APM4;E9QKM8;Q80X37;A2APM1;A2APM2;P15379	Q3U8S1;A2APM5;A2APM3;A2APM4;E9QKM8;Q80X37;A2APM1;A2APM2;P15379	1;1;1;1;1;1;1;1;1	1;1;1;1;1;1;1;1;1	1;1;1;1;1;1;1;1;1	CD44 antigen	Cd44	tr|Q3U8S1|Q3U8S1_MOUSE CD44 antigen OS=Mus musculus OX=10090 GN=Cd44 PE=1 SV=1;tr|A2APM5|A2APM5_MOUSE CD44 antigen OS=Mus musculus OX=10090 GN=Cd44 PE=1 SV=1;tr|A2APM3|A2APM3_MOUSE CD44 antigen OS=Mus musculus OX=10090 GN=Cd44 PE=1 SV=1;tr|A2APM4|A2APM4_MO	9	1	1	1	1	0	0	0	0	0	1	0	0	0	0	0	1	0	0	0	0	0	2.2	2.2	2.2	40.263	365	365;434;464;498;577;580;657;780;778	1	-2	By MS/MS						2.2	0	0	0	0	0
A2AQN2;Q99JP7	A2AQN2;Q99JP7	2;2	2;2	2;2	Gamma-glutamyltransferase 7;Gamma-glutamyltransferase 7 heavy chain;Gamma-glutamyltransferase 7 light chain	Ggt7	tr|A2AQN2|A2AQN2_MOUSE Glutathione hydrolase 7 (Fragment) OS=Mus musculus OX=10090 GN=Ggt7 PE=1 SV=1;sp|Q99JP7|GGT7_MOUSE Glutathione hydrolase 7 OS=Mus musculus OX=10090 GN=Ggt7 PE=1 SV=2	2	2	2	2	2	2	2	1	2	2	2	2	2	1	2	2	2	2	2	1	2	2	14.9	14.9	14.9	21.052	202	202;662	0	22.597	By MS/MS	By MS/MS	By MS/MS	By matching	By matching	By matching	14.9	14.9	14.9	6.4	14.9	14.9
A2ATP5;A2ATP6;Q8C854;F6XJA1	A2ATP5;A2ATP6;Q8C854;F6XJA1	2;2;2;1	2;2;2;1	2;2;2;1	Myelin expression factor 2	Myef2	tr|A2ATP5|A2ATP5_MOUSE Myelin expression factor 2 OS=Mus musculus OX=10090 GN=Myef2 PE=1 SV=1;tr|A2ATP6|A2ATP6_MOUSE Myelin expression factor 2 OS=Mus musculus OX=10090 GN=Myef2 PE=1 SV=2;sp|Q8C854|MYEF2_MOUSE Myelin expression factor 2 OS=Mus musculus OX=	4	2	2	2	1	1	2	0	0	0	1	1	2	0	0	0	1	1	2	0	0	0	6.2	6.2	6.2	59.543	550	550;567;591;446	0	18.315	By matching	By matching	By MS/MS				2	2	6.2	0	0	0
A2ATU9;Q8BY71	A2ATU9;Q8BY71	2;2	2;2	2;2	Histone acetyltransferase type B catalytic subunit	Hat1	tr|A2ATU9|A2ATU9_MOUSE Histone acetyltransferase type B catalytic subunit OS=Mus musculus OX=10090 GN=Hat1 PE=1 SV=1;sp|Q8BY71|HAT1_MOUSE Histone acetyltransferase type B catalytic subunit OS=Mus musculus OX=10090 GN=Hat1 PE=1 SV=1	2	2	2	2	0	2	0	0	0	1	0	2	0	0	0	1	0	2	0	0	0	1	5.4	5.4	5.4	50.182	423	423;416	0	13.085		By MS/MS				By matching	0	5.4	0	0	0	2.4
A2AVJ7;Q99PL5	A2AVJ7;Q99PL5	21;21	21;21	21;21	Ribosome-binding protein 1	Rrbp1	tr|A2AVJ7|A2AVJ7_MOUSE Ribosome-binding protein 1 OS=Mus musculus OX=10090 GN=Rrbp1 PE=1 SV=1;sp|Q99PL5|RRBP1_MOUSE Ribosome-binding protein 1 OS=Mus musculus OX=10090 GN=Rrbp1 PE=1 SV=2	2	21	21	21	18	20	19	15	16	16	18	20	19	15	16	16	18	20	19	15	16	16	12.6	12.6	12.6	158.39	1464	1464;1605	0	171.63	By MS/MS	By MS/MS	By MS/MS	By MS/MS	By MS/MS	By MS/MS	11.3	11.9	11.7	9.4	10.7	10
A2BFF8;Q3TPJ8;A2BFF5;A2BFF9;O88487;Q3TYJ3;D3Z0M6;O88485	A2BFF8;Q3TPJ8;A2BFF5;A2BFF9;O88487	4;4;4;4;4;1;1;1	4;4;4;4;4;1;1;1	4;4;4;4;4;1;1;1	Cytoplasmic dynein 1 intermediate chain 2	Dync1i2	tr|A2BFF8|A2BFF8_MOUSE Cytoplasmic dynein 1 intermediate chain 2 OS=Mus musculus OX=10090 GN=Dync1i2 PE=1 SV=1;tr|Q3TPJ8|Q3TPJ8_MOUSE Cytoplasmic dynein 1 intermediate chain 2 OS=Mus musculus OX=10090 GN=Dync1i2 PE=1 SV=1;tr|A2BFF5|A2BFF5_MOUSE Cytoplasmic	8	4	4	4	2	4	4	1	1	3	2	4	4	1	1	3	2	4	4	1	1	3	10	10	10	68.265	611	611;632;637;638;612;617;645;628	0	25.416	By MS/MS	By MS/MS	By MS/MS	By matching	By matching	By matching	5.7	10	10	3.4	2.3	8
A3KFU5;Q6PHQ9;Q91YZ8;A3KFU8	A3KFU5;Q6PHQ9;Q91YZ8;A3KFU8	4;4;3;3	2;2;1;1	2;2;1;1	Polyadenylate-binding protein	Pabpc4	tr|A3KFU5|A3KFU5_MOUSE Polyadenylate-binding protein OS=Mus musculus OX=10090 GN=Pabpc4 PE=1 SV=1;tr|Q6PHQ9|Q6PHQ9_MOUSE Polyadenylate-binding protein OS=Mus musculus OX=10090 GN=Pabpc4 PE=1 SV=1;tr|Q91YZ8|Q91YZ8_MOUSE Polyadenylate-binding protein OS=Mus	4	4	2	2	3	3	4	2	4	2	1	1	2	0	2	0	1	1	2	0	2	0	5.4	2.9	2.9	69.43	631	631;660;615;644	0	11.577	By matching	By MS/MS	By matching	By matching	By MS/MS	By matching	3.8	3.8	5.4	2.5	5.4	2.5
A3KGU5;A3KGU7;E9Q447;A3KGU9;P16546;A3KGU4	A3KGU5;A3KGU7;E9Q447;A3KGU9;P16546	7;7;7;7;7;1	7;7;7;7;7;1	7;7;7;7;7;1	Spectrin alpha chain, non-erythrocytic 1	Sptan1	tr|A3KGU5|A3KGU5_MOUSE Spectrin alpha chain, non-erythrocytic 1 OS=Mus musculus OX=10090 GN=Sptan1 PE=1 SV=1;tr|A3KGU7|A3KGU7_MOUSE Spectrin alpha chain, non-erythrocytic 1 OS=Mus musculus OX=10090 GN=Sptan1 PE=1 SV=1;tr|E9Q447|E9Q447_MOUSE Spectrin alpha	6	7	7	7	6	7	7	4	6	6	6	7	7	4	6	6	6	7	7	4	6	6	3.3	3.3	3.3	282.89	2457	2457;2477;2478;2498;2472;219	0	48.821	By MS/MS	By MS/MS	By MS/MS	By matching	By MS/MS	By MS/MS	2.6	3.3	3.3	2.1	2.9	2.9
A6BLY7	A6BLY7	2	1	1	Keratin, type I cytoskeletal 28	Krt28	sp|A6BLY7|K1C28_MOUSE Keratin, type I cytoskeletal 28 OS=Mus musculus OX=10090 GN=Krt28 PE=1 SV=1	1	2	1	1	1	1	1	1	2	1	0	0	0	0	1	0	0	0	0	0	1	0	3.5	1.9	1.9	50.346	462	462	0	6.354	By matching	By matching	By matching	By matching	By MS/MS	By matching	1.5	1.5	1.5	1.5	3.5	1.5
A6PWZ2;O55135	A6PWZ2;O55135	1;1	1;1	1;1	Eukaryotic translation initiation factor 6	Eif6	tr|A6PWZ2|A6PWZ2_MOUSE Eukaryotic translation initiation factor 6 (Fragment) OS=Mus musculus OX=10090 GN=Eif6 PE=1 SV=1;sp|O55135|IF6_MOUSE Eukaryotic translation initiation factor 6 OS=Mus musculus OX=10090 GN=Eif6 PE=1 SV=2	2	1	1	1	1	1	1	1	1	1	1	1	1	1	1	1	1	1	1	1	1	1	17.2	17.2	17.2	6.4953	58	58;245	0.0054466	6.0004	By MS/MS	By MS/MS	By matching	By matching	By MS/MS	By MS/MS	17.2	17.2	17.2	17.2	17.2	17.2
E9PUJ2;A8Y5I3;Q5SV02;P70388	E9PUJ2;A8Y5I3;Q5SV02;P70388	3;3;3;3	3;3;3;3	3;3;3;3	DNA repair protein RAD50	Rad50	tr|E9PUJ2|E9PUJ2_MOUSE DNA repair protein RAD50 OS=Mus musculus OX=10090 GN=Rad50 PE=1 SV=1;tr|A8Y5I3|A8Y5I3_MOUSE DNA repair protein RAD50 (Fragment) OS=Mus musculus OX=10090 GN=Rad50 PE=1 SV=1;tr|Q5SV02|Q5SV02_MOUSE DNA repair protein RAD50 OS=Mus muscul	4	3	3	3	2	3	3	0	0	0	2	3	3	0	0	0	2	3	3	0	0	0	5.6	5.6	5.6	63.958	551	551;657;1312;1312	0	23.05	By MS/MS	By MS/MS	By MS/MS				3.4	5.6	5.6	0	0	0
B0V2N8;B0V2N7;B0V2N5;P07356	B0V2N8;B0V2N7;B0V2N5;P07356	1;1;1;1	1;1;1;1	1;1;1;1	Annexin;Annexin A2	Anxa2	tr|B0V2N8|B0V2N8_MOUSE Annexin (Fragment) OS=Mus musculus OX=10090 GN=Anxa2 PE=1 SV=1;tr|B0V2N7|B0V2N7_MOUSE Annexin (Fragment) OS=Mus musculus OX=10090 GN=Anxa2 PE=1 SV=1;tr|B0V2N5|B0V2N5_MOUSE Annexin (Fragment) OS=Mus musculus OX=10090 GN=Anxa2 PE=1 SV=	4	1	1	1	0	1	1	1	1	1	0	1	1	1	1	1	0	1	1	1	1	1	5.7	5.7	5.7	19.596	176	176;196;272;339	0	7.7633		By matching	By matching	By matching	By MS/MS	By MS/MS	0	5.7	5.7	5.7	5.7	5.7
B1AR93;F7C265;Q9D024	B1AR93;F7C265;Q9D024	3;3;3	3;3;3	3;3;3	Coiled-coil domain-containing protein 47	Ccdc47	tr|B1AR93|B1AR93_MOUSE Coiled-coil domain-containing protein 47 (Fragment) OS=Mus musculus OX=10090 GN=Ccdc47 PE=1 SV=1;tr|F7C265|F7C265_MOUSE Coiled-coil domain-containing protein 47 (Fragment) OS=Mus musculus OX=10090 GN=Ccdc47 PE=1 SV=1;sp|Q9D024|CCD47_	3	3	3	3	2	2	3	2	0	1	2	2	3	2	0	1	2	2	3	2	0	1	14.5	14.5	14.5	16.285	138	138;224;483	0	21.251	By MS/MS	By MS/MS	By MS/MS	By matching		By matching	8	14.5	14.5	14.5	0	6.5
B1AT92;Q60631;B1AT95	B1AT92;Q60631;B1AT95	2;2;1	2;2;1	2;2;1	Growth factor receptor-bound protein 2	Grb2	tr|B1AT92|B1AT92_MOUSE Growth factor receptor-bound protein 2 OS=Mus musculus OX=10090 GN=Grb2 PE=1 SV=1;sp|Q60631|GRB2_MOUSE Growth factor receptor-bound protein 2 OS=Mus musculus OX=10090 GN=Grb2 PE=1 SV=1;tr|B1AT95|B1AT95_MOUSE Growth factor receptor-bo	3	2	2	2	2	2	2	2	2	2	2	2	2	2	2	2	2	2	2	2	2	2	8.9	8.9	8.9	23.587	203	203;217;71	0	11.54	By matching	By matching	By MS/MS	By matching	By matching	By matching	8.9	8.9	8.9	8.9	8.9	8.9
B1AV77;B1ATI0;P47740	B1AV77;B1ATI0;P47740	1;1;1	1;1;1	1;1;1	Aldehyde dehydrogenase;Fatty aldehyde dehydrogenase	Aldh3a2	tr|B1AV77|B1AV77_MOUSE Aldehyde dehydrogenase OS=Mus musculus OX=10090 GN=Aldh3a2 PE=1 SV=1;tr|B1ATI0|B1ATI0_MOUSE Aldehyde dehydrogenase OS=Mus musculus OX=10090 GN=Aldh3a2 PE=1 SV=1;sp|P47740|AL3A2_MOUSE Fatty aldehyde dehydrogenase OS=Mus musculus OX=10	3	1	1	1	1	1	1	0	0	0	1	1	1	0	0	0	1	1	1	0	0	0	2.5	2.5	2.5	54.33	487	487;532;484	0	9.8849	By MS/MS	By MS/MS	By MS/MS				2.5	2.5	2.5	0	0	0
B1AU25;Q9Z0X1	B1AU25;Q9Z0X1	3;3	3;3	3;3	Apoptosis-inducing factor 1, mitochondrial	Aifm1	tr|B1AU25|B1AU25_MOUSE Apoptosis-inducing factor 1, mitochondrial OS=Mus musculus OX=10090 GN=Aifm1 PE=1 SV=1;sp|Q9Z0X1|AIFM1_MOUSE Apoptosis-inducing factor 1, mitochondrial OS=Mus musculus OX=10090 GN=Aifm1 PE=1 SV=1	2	3	3	3	3	3	3	1	0	1	3	3	3	1	0	1	3	3	3	1	0	1	6.1	6.1	6.1	66.113	608	608;612	0	32.574	By MS/MS	By MS/MS	By MS/MS	By matching		By matching	6.1	6.1	6.1	1.8	0	2.5
F7CUT1;F6TQF4;F6THK7;B1AUW8;B1AUW9;Q8BR10;B1AUW6;Q62406	F7CUT1;F6TQF4;F6THK7;B1AUW8;B1AUW9;Q8BR10;B1AUW6;Q62406	1;1;1;1;1;1;1;1	1;1;1;1;1;1;1;1	1;1;1;1;1;1;1;1	Interleukin-1 receptor-associated kinase 1	Irak1	tr|F7CUT1|F7CUT1_MOUSE Interleukin-1 receptor-associated kinase 1 (Fragment) OS=Mus musculus OX=10090 GN=Irak1 PE=1 SV=1;tr|F6TQF4|F6TQF4_MOUSE Interleukin-1 receptor-associated kinase 1 (Fragment) OS=Mus musculus OX=10090 GN=Irak1 PE=1 SV=1;tr|F6THK7|F6TH	8	1	1	1	1	1	1	0	0	0	1	1	1	0	0	0	1	1	1	0	0	0	5.1	5.1	5.1	23.032	216	216;257;383;631;683;711;750;710	0	9.7781	By matching	By MS/MS	By MS/MS				5.1	5.1	5.1	0	0	0
B1AUX2;Q61191	B1AUX2;Q61191	1;1	1;1	1;1	Host cell factor 1;HCF N-terminal chain 1;HCF N-terminal chain 2;HCF N-terminal chain 3;HCF N-terminal chain 4;HCF N-terminal chain 5;HCF N-terminal chain 6;HCF C-terminal chain 1;HCF C-terminal chain 2;HCF C-terminal chain 3;HCF C-terminal chain 4;HCF C-terminal chain 5;HCF C-terminal chain 6	Hcfc1	tr|B1AUX2|B1AUX2_MOUSE Host cell factor 1 OS=Mus musculus OX=10090 GN=Hcfc1 PE=1 SV=1;sp|Q61191|HCFC1_MOUSE Host cell factor 1 OS=Mus musculus OX=10090 GN=Hcfc1 PE=1 SV=2	2	1	1	1	1	1	1	1	1	1	1	1	1	1	1	1	1	1	1	1	1	1	0.5	0.5	0.5	215.05	2090	2090;2045	0.0011669	6.1685	By matching	By MS/MS	By MS/MS	By matching	By matching	By matching	0.5	0.5	0.5	0.5	0.5	0.5
G3UZ46;Q80VK8;B1AWC8;Q8VBU5;B1AWC9	G3UZ46;Q80VK8;B1AWC8;Q8VBU5;B1AWC9	1;1;1;1;1	1;1;1;1;1	1;1;1;1;1		Pde4b	tr|G3UZ46|G3UZ46_MOUSE Phosphodiesterase 4B, cAMP-specific OS=Mus musculus OX=10090 GN=Pde4b PE=1 SV=1;tr|Q80VK8|Q80VK8_MOUSE Pde4b protein OS=Mus musculus OX=10090 GN=Pde4b PE=1 SV=1;tr|B1AWC8|B1AWC8_MOUSE Phosphodiesterase OS=Mus musculus OX=10090 GN=Pde	5	1	1	1	1	1	1	1	1	1	1	1	1	1	1	1	1	1	1	1	1	1	6.8	6.8	6.8	17.327	161	161;212;659;721;736	0	22.624	By MS/MS	By MS/MS	By MS/MS	By matching	By matching	By matching	6.8	6.8	6.8	6.8	6.8	6.8
B1AWD6;Q9CYL5	B1AWD6;Q9CYL5	1;1	1;1	1;1	Golgi-associated plant pathogenesis-related protein 1	Glipr2	tr|B1AWD6|B1AWD6_MOUSE Golgi-associated plant pathogenesis-related protein 1 OS=Mus musculus OX=10090 GN=Glipr2 PE=1 SV=1;sp|Q9CYL5|GAPR1_MOUSE Golgi-associated plant pathogenesis-related protein 1 OS=Mus musculus OX=10090 GN=Glipr2 PE=1 SV=3	2	1	1	1	1	1	1	1	0	1	1	1	1	1	0	1	1	1	1	1	0	1	15.7	15.7	15.7	9.0801	83	83;154	0	10.375	By MS/MS	By matching	By matching	By matching		By matching	15.7	15.7	15.7	15.7	0	15.7
B1AWE0;Q6PFA2;B1AWE1;B1AWD8;B1AWD9;O08585	B1AWE0;Q6PFA2;B1AWE1;B1AWD8;B1AWD9;O08585	1;1;1;1;1;1	1;1;1;1;1;1	1;1;1;1;1;1	Clathrin light chain A	Clta	tr|B1AWE0|B1AWE0_MOUSE Clathrin light chain OS=Mus musculus OX=10090 GN=Clta PE=1 SV=1;tr|Q6PFA2|Q6PFA2_MOUSE Clathrin light chain OS=Mus musculus OX=10090 GN=Clta PE=1 SV=1;tr|B1AWE1|B1AWE1_MOUSE Clathrin light chain OS=Mus musculus OX=10090 GN=Clta PE=1	6	1	1	1	1	0	1	1	0	1	1	0	1	1	0	1	1	0	1	1	0	1	4.2	4.2	4.2	23.478	216	216;218;230;236;248;235	0.0034169	6.1086	By MS/MS		By matching	By matching		By matching	4.2	0	4.2	4.2	0	4.2
B1AXI9;J3QMP9;Q62036	B1AXI9;J3QMP9;Q62036	1;1;1	1;1;1	1;1;1	Centrosomal protein of 131 kDa	Cep131	tr|B1AXI9|B1AXI9_MOUSE 5-azacytidine induced gene 1 OS=Mus musculus OX=10090 GN=Cep131 PE=1 SV=1;tr|J3QMP9|J3QMP9_MOUSE Centrosomal protein of 131 kDa OS=Mus musculus OX=10090 GN=Cep131 PE=1 SV=1;sp|Q62036|CP131_MOUSE Centrosomal protein of 131 kDa OS=Mus	3	1	1	1	1	1	1	0	0	0	1	1	1	0	0	0	1	1	1	0	0	0	1	1	1	120.23	1059	1059;1060;1060	0.0055005	6.0111	By MS/MS	By matching	By MS/MS				1	1	1	0	0	0
B1AZS9;O08807	B1AZS9;O08807	2;2	1;1	1;1	Peroxiredoxin-4	Prdx4	tr|B1AZS9|B1AZS9_MOUSE Peroxiredoxin-4 (Fragment) OS=Mus musculus OX=10090 GN=Prdx4 PE=1 SV=1;sp|O08807|PRDX4_MOUSE Peroxiredoxin-4 OS=Mus musculus OX=10090 GN=Prdx4 PE=1 SV=1	2	2	1	1	2	1	1	1	2	2	1	1	1	1	1	1	1	1	1	1	1	1	8.3	4.8	4.8	26.391	229	229;274	0	9.7043	By MS/MS	By MS/MS	By MS/MS	By matching	By MS/MS	By MS/MS	8.3	4.8	4.8	4.8	8.3	8.3
B1B0C7;E9PZ16;Q05793	B1B0C7;E9PZ16;Q05793	1;1;1	1;1;1	1;1;1	Basement membrane-specific heparan sulfate proteoglycan core protein;Endorepellin;LG3 peptide	Hspg2	tr|B1B0C7|B1B0C7_MOUSE Basement membrane-specific heparan sulfate proteoglycan core protein OS=Mus musculus OX=10090 GN=Hspg2 PE=1 SV=1;tr|E9PZ16|E9PZ16_MOUSE Basement membrane-specific heparan sulfate proteoglycan core protein OS=Mus musculus OX=10090 GN=	3	1	1	1	1	1	1	1	1	1	1	1	1	1	1	1	1	1	1	1	1	1	0.3	0.3	0.3	469.02	4375	4375;4383;3707	0.003352	6.0538	By matching	By MS/MS	By MS/MS	By matching	By matching	By matching	0.3	0.3	0.3	0.3	0.3	0.3
I7HPB1;I7HFU4;B2FDF6;Q8R570	I7HPB1;I7HFU4;B2FDF6;Q8R570	1;1;1;1	1;1;1;1	1;1;1;1	Synaptosomal-associated protein 47	Snap47	tr|I7HPB1|I7HPB1_MOUSE Synaptosomal-associated protein 47 (Fragment) OS=Mus musculus OX=10090 GN=Snap47 PE=1 SV=1;tr|I7HFU4|I7HFU4_MOUSE Synaptosomal-associated protein 47 (Fragment) OS=Mus musculus OX=10090 GN=Snap47 PE=1 SV=1;tr|B2FDF6|B2FDF6_MOUSE Synap	4	1	1	1	0	1	0	1	1	1	0	1	0	1	1	1	0	1	0	1	1	1	5.5	5.5	5.5	20.634	181	181;183;329;413	0	7.9608		By matching		By matching	By MS/MS	By MS/MS	0	5.5	0	5.5	5.5	5.5
B2KGR2;O89112	B2KGR2;O89112	1;1	1;1	1;1	LanC-like protein 1	Lancl1	tr|B2KGR2|B2KGR2_MOUSE LanC-like protein 1 (Fragment) OS=Mus musculus OX=10090 GN=Lancl1 PE=1 SV=1;sp|O89112|LANC1_MOUSE LanC-like protein 1 OS=Mus musculus OX=10090 GN=Lancl1 PE=1 SV=1	2	1	1	1	1	1	1	0	1	1	1	1	1	0	1	1	1	1	1	0	1	1	6.9	6.9	6.9	19.656	173	173;399	0	6.3088	By matching	By MS/MS	By MS/MS		By matching	By matching	6.9	6.9	6.9	0	6.9	6.9
B2M1R6;P61979;H3BKD0;H3BLL4;H3BKI8;A0A286YCM2;A0A286YDM3;H3BK96;Q8BT23;A0A286YDH1;A0A286YEC4;H3BJ43;H3BLP7;A0A286YE41;H3BJS9	B2M1R6;P61979;H3BKD0;H3BLL4;H3BKI8;A0A286YCM2;A0A286YDM3;H3BK96	10;10;6;6;5;5;5;5;4;4;4;3;3;2;1	10;10;6;6;5;5;5;5;4;4;4;3;3;2;1	10;10;6;6;5;5;5;5;4;4;4;3;3;2;1	Heterogeneous nuclear ribonucleoprotein K	Hnrnpk	tr|B2M1R6|B2M1R6_MOUSE Heterogeneous nuclear ribonucleoprotein K OS=Mus musculus OX=10090 GN=Hnrnpk PE=1 SV=1;sp|P61979|HNRPK_MOUSE Heterogeneous nuclear ribonucleoprotein K OS=Mus musculus OX=10090 GN=Hnrnpk PE=1 SV=1;tr|H3BKD0|H3BKD0_MOUSE Heterogeneous	15	10	10	10	8	9	8	8	8	8	8	9	8	8	8	8	8	9	8	8	8	8	18.6	18.6	18.6	48.562	440	440;463;299;394;178;192;230;256;97;143;150;77;210;52;87	0	84.629	By MS/MS	By MS/MS	By MS/MS	By MS/MS	By MS/MS	By MS/MS	16.4	16.8	16.4	16.4	18	16.6
E9QAI5;B2RQC6;G3UWN2;E9QAT6;F6S3Z3	E9QAI5;B2RQC6;G3UWN2	18;18;16;8;1	18;18;16;8;1	18;18;16;8;1	CAD protein;Glutamine-dependent carbamoyl-phosphate synthase;Aspartate carbamoyltransferase;Dihydroorotase	Cad	tr|E9QAI5|E9QAI5_MOUSE CAD protein OS=Mus musculus OX=10090 GN=Cad PE=1 SV=1;sp|B2RQC6|PYR1_MOUSE CAD protein OS=Mus musculus OX=10090 GN=Cad PE=1 SV=1;tr|G3UWN2|G3UWN2_MOUSE CAD protein OS=Mus musculus OX=10090 GN=Cad PE=1 SV=1	5	18	18	18	18	18	18	9	16	15	18	18	18	9	16	15	18	18	18	9	16	15	8.8	8.8	8.8	236.25	2162	2162;2225;2164;971;194	0	139.27	By MS/MS	By MS/MS	By MS/MS	By matching	By MS/MS	By matching	8.8	8.8	8.8	4.2	8	7.5
B2RWE8;Q8BGD9	B2RWE8;Q8BGD9	1;1	1;1	1;1	Eukaryotic translation initiation factor 4B	Eif4b	tr|B2RWE8|B2RWE8_MOUSE Eif4b protein OS=Mus musculus OX=10090 GN=Eif4b PE=1 SV=1;sp|Q8BGD9|IF4B_MOUSE Eukaryotic translation initiation factor 4B OS=Mus musculus OX=10090 GN=Eif4b PE=1 SV=1	2	1	1	1	0	1	0	1	1	0	0	1	0	1	1	0	0	1	0	1	1	0	4	4	4	46.478	403	403;611	0.0054526	6.0005		By MS/MS		By matching	By matching		0	4	0	4	4	0
B2RXS3;F8VQ70;Q8BIZ8	B2RXS3;F8VQ70	5;5;2	5;5;2	5;5;2		Scaper	tr|B2RXS3|B2RXS3_MOUSE S phase cyclin A-associated protein in the ER OS=Mus musculus OX=10090 GN=Scaper PE=1 SV=1;tr|F8VQ70|F8VQ70_MOUSE S phase cyclin A-associated protein in the ER OS=Mus musculus OX=10090 GN=Scaper PE=1 SV=1	3	5	5	5	5	5	5	1	0	0	5	5	5	1	0	0	5	5	5	1	0	0	3.1	3.1	3.1	157.14	1392	1392;1398;905	0	29.9	By MS/MS	By MS/MS	By MS/MS	By matching			3.1	3.1	3.1	0.7	0	0
S4R2B0;B2RY56	S4R2B0;B2RY56	1;1	1;1	1;1	RNA-binding protein 25	Rbm25	tr|S4R2B0|S4R2B0_MOUSE RNA-binding protein 25 (Fragment) OS=Mus musculus OX=10090 GN=Rbm25 PE=1 SV=1;sp|B2RY56|RBM25_MOUSE RNA-binding protein 25 OS=Mus musculus OX=10090 GN=Rbm25 PE=1 SV=2	2	1	1	1	0	1	1	0	0	0	0	1	1	0	0	0	0	1	1	0	0	0	3.1	3.1	3.1	71.006	585	585;838	0	6.2574		By MS/MS	By matching				0	3.1	3.1	0	0	0
B7FAV1;B7FAU9;Q8BTM8;F6XC15;J3JS91;F6Z2C0;F7AVL7	B7FAV1;B7FAU9;Q8BTM8	27;27;27;5;3;2;1	27;27;27;5;3;2;1	26;26;26;5;2;2;1	Filamin-A	Flna	tr|B7FAV1|B7FAV1_MOUSE Filamin, alpha (Fragment) OS=Mus musculus OX=10090 GN=Flna PE=1 SV=1;tr|B7FAU9|B7FAU9_MOUSE Filamin, alpha OS=Mus musculus OX=10090 GN=Flna PE=1 SV=1;sp|Q8BTM8|FLNA_MOUSE Filamin-A OS=Mus musculus OX=10090 GN=Flna PE=1 SV=5	7	27	27	26	24	22	21	20	25	24	24	22	21	20	25	24	24	22	21	19	24	23	12.7	12.7	12.4	274.63	2583	2583;2639;2647;511;277;280;74	0	243.86	By MS/MS	By MS/MS	By MS/MS	By MS/MS	By MS/MS	By MS/MS	11.2	10.8	10.5	9.5	12.1	11.2
D6REF6;B7ZBY0;Q91WK7	D6REF6;B7ZBY0;Q91WK7	1;1;1	1;1;1	1;1;1	Ankyrin repeat domain-containing protein 54	Ankrd54	tr|D6REF6|D6REF6_MOUSE Ankyrin repeat domain-containing protein 54 OS=Mus musculus OX=10090 GN=Ankrd54 PE=1 SV=1;tr|B7ZBY0|B7ZBY0_MOUSE Ankyrin repeat domain-containing protein 54 (Fragment) OS=Mus musculus OX=10090 GN=Ankrd54 PE=1 SV=8;sp|Q91WK7|ANR54_MOU	3	1	1	1	1	1	1	0	0	0	1	1	1	0	0	0	1	1	1	0	0	0	8.8	8.8	8.8	14.265	137	137;200;299	0	12.138	By MS/MS	By MS/MS	By matching				8.8	8.8	8.8	0	0	0
E9QMU1;J3QNW9;B7ZNG0	E9QMU1;J3QNW9;B7ZNG0	1;1;1	1;1;1	1;1;1	Kinesin-like protein;Kinesin-like protein KIF7	Kif7	tr|E9QMU1|E9QMU1_MOUSE Kinesin-like protein KIF7 OS=Mus musculus OX=10090 GN=Kif7 PE=1 SV=1;tr|J3QNW9|J3QNW9_MOUSE Kinesin-like protein KIF7 OS=Mus musculus OX=10090 GN=Kif7 PE=1 SV=1;sp|B7ZNG0|KIF7_MOUSE Kinesin-like protein KIF7 OS=Mus musculus OX=10090	3	1	1	1	1	1	1	0	0	0	1	1	1	0	0	0	1	1	1	0	0	0	0.9	0.9	0.9	151.54	1347	1347;1348;1348	0	7.5008	By matching	By matching	By MS/MS				0.9	0.9	0.9	0	0	0
B7ZNL2;Q78ZA7;A0A140LJ37;A0A140LJB5;Q3TF41;Q8BSH9;E9PW66;P28656	B7ZNL2;Q78ZA7;A0A140LJ37;A0A140LJB5;Q3TF41;Q8BSH9;E9PW66;P28656	2;2;1;1;1;1;1;1	2;2;1;1;1;1;1;1	2;2;1;1;1;1;1;1	Nucleosome assembly protein 1-like 4;Nucleosome assembly protein 1-like 1	Nap1l4;Nap1l1	tr|B7ZNL2|B7ZNL2_MOUSE Nap1l4 protein OS=Mus musculus OX=10090 GN=Nap1l4 PE=1 SV=1;sp|Q78ZA7|NP1L4_MOUSE Nucleosome assembly protein 1-like 4 OS=Mus musculus OX=10090 GN=Nap1l4 PE=1 SV=1;tr|A0A140LJ37|A0A140LJ37_MOUSE Nucleosome assembly protein 1-like 4 (	8	2	2	2	0	2	1	0	0	0	0	2	1	0	0	0	0	2	1	0	0	0	7.3	7.3	7.3	43.934	386	386;375;75;219;368;383;418;391	0	12.751		By MS/MS	By MS/MS				0	7.3	4.7	0	0	0
B8JKK2;Q9CZM2	B8JKK2;Q9CZM2	1;1	1;1	1;1	Ribosomal protein L15;60S ribosomal protein L15	Rpl15	tr|B8JKK2|B8JKK2_MOUSE Ribosomal protein L15 (Fragment) OS=Mus musculus OX=10090 GN=Rpl15 PE=1 SV=1;sp|Q9CZM2|RL15_MOUSE 60S ribosomal protein L15 OS=Mus musculus OX=10090 GN=Rpl15 PE=1 SV=4	2	1	1	1	1	1	1	1	1	1	1	1	1	1	1	1	1	1	1	1	1	1	8.4	8.4	8.4	12.65	107	107;204	0	7.1394	By matching	By MS/MS	By matching	By MS/MS	By MS/MS	By MS/MS	8.4	8.4	8.4	8.4	8.4	8.4
CON__ENSEMBL:ENSBTAP00000038253	CON__ENSEMBL:ENSBTAP00000038253	10	1	0				1	10	1	0	8	9	8	7	10	9	1	0	1	0	1	1	0	0	0	0	0	0	13.9	1.7	0	63.165	606	606	0.004415	6.0184	By matching	By matching	By matching	By matching	By MS/MS	By matching	13.2	12.2	13.2	9.7	13.9	11.9
CON__ENSEMBL:ENSP00000377550	CON__ENSEMBL:ENSP00000377550	10	4	0				1	10	4	0	5	4	3	4	10	10	0	0	1	0	4	4	0	0	0	0	0	0	21.2	9.8	0	45.771	420	420	0	27.265	By matching	By matching	By matching	By matching	By MS/MS	By MS/MS	9.5	6.7	7.6	7.4	21.2	21.2
CON__P00761;CON__P07477;E9QPR6;Q5U405	CON__P00761	5;1;1;1	5;1;1;1	5;1;1;1				4	5	5	5	5	5	5	5	4	4	5	5	5	5	4	4	5	5	5	5	4	4	28.6	28.6	28.6	24.409	231	231;247;548;543	0	88.647	By MS/MS	By MS/MS	By MS/MS	By MS/MS	By MS/MS	By MS/MS	28.6	28.6	28.6	28.6	19.9	19.9
CON__P02533	CON__P02533	21	8	1				1	21	8	1	13	17	8	16	21	20	4	8	2	7	8	8	1	1	0	1	1	1	39.8	20.1	3.2	51.621	472	472	0	88.154	By MS/MS	By MS/MS	By MS/MS	By matching	By MS/MS	By MS/MS	25.6	35.4	13.1	34.5	39.8	39.6
CON__P02538;CON__Q8VED5;CON__Q8BGZ7;CON__O95678;Q8VED5;Q8BGZ7;E9Q1Z0	CON__P02538	21;7;7;7;7;7;6	3;0;0;0;0;0;0	1;0;0;0;0;0;0				7	21	3	1	13	12	11	17	20	17	2	2	2	2	3	3	1	1	1	1	1	1	28.4	6.2	1.8	60.044	564	564;531;551;551;531;551;538	0	21.547	By MS/MS	By matching	By MS/MS	By MS/MS	By MS/MS	By MS/MS	21.3	17.6	16.5	22.9	28.4	23.6
CON__P02769	CON__P02769	3	3	3				1	3	3	3	3	3	3	3	2	2	3	3	3	3	2	2	3	3	3	3	2	2	4.6	4.6	4.6	69.293	607	607	0	20.778	By MS/MS	By MS/MS	By matching	By MS/MS	By MS/MS	By matching	4.6	4.6	4.6	4.6	3	3
CON__P04259	CON__P04259	22	12	3				1	22	12	3	12	10	11	18	21	16	5	1	5	9	12	8	1	0	1	2	3	2	28.5	17.4	4.6	59.998	564	564	0	85.993	By MS/MS	By matching	By MS/MS	By MS/MS	By MS/MS	By MS/MS	19.5	12.8	16.5	24.3	28.5	21.8
CON__P04264;CON__H-INV:HIT000016045	CON__P04264	35;3	35;3	20;0				2	35	35	20	28	31	28	29	33	31	28	31	28	29	33	31	15	17	15	17	19	17	50.3	50.3	36.3	66.017	644	644;99	0	323.31	By MS/MS	By MS/MS	By MS/MS	By MS/MS	By MS/MS	By MS/MS	44.1	46.6	38.2	43.2	49.2	46
CON__P08727	CON__P08727	6	1	1				1	6	1	1	5	5	4	4	6	6	0	0	0	0	1	1	0	0	0	0	1	1	10.8	2.2	2.2	44.091	400	400	0	7.3139	By matching	By matching	By matching	By matching	By MS/MS	By matching	8.5	8.5	6.2	6.2	10.8	10.8
CON__P08779;CON__Q9Z2K1;CON__Q3ZAW8;Q9Z2K1;CON__A2A4G1;B1AQ77;Q61414;CON__P19001;P19001;CON__P05784;CON__P35900;CON__Q9D312;CON__Q99456;Q8CCX5;P05784;Q9D312;CON__Q8N1A0;CON__Q14525;CON__Q9UE12;CON__Q15323;CON__A2A5Y0;CON__Q92764;CON__Q14532;CON__A2AB72;B1ATJ5;CON__Q497I4;CON__O76015;CON__O76013;CON__Q7Z3Y9;CON__O76014;CON__REFSEQ:XP_986630;Q61897;Q62168;Q61765;Q6IFX3;Q8VCW2;Q9Z320;Q497I4;B1AQ75;A…	CON__P08779	24;11;11;11;6;6;6;5;5;2;2;2;2;2;2;2;1;1;1;1;1;1;1;1;1;1;1;1;1;1;1;1;1;1;1;1;1;1;1;1	24;11;11;11;6;6;6;5;5;2;2;2;2;2;2;2;1;1;1;1;1;1;1;1;1;1;1;1;1;1;1;1;1;1;1;1;1;1;1;1	11;3;3;3;0;0;0;0;0;0;0;0;0;0;0;0;0;0;0;0;0;0;0;0;0;0;0;0;0;0;0;0;0;0;0;0;0;0;0;0				40	24	24	11	14	11	9	14	24	18	14	11	9	14	24	18	5	2	3	5	11	6	45	45	25.4	51.267	473	473;469;474;469;456;456;452;403;403;423;424;431;494;294;423;431;295;404;416;416;416;425;448;453;453;455;456;467;468;471;476;404;407;416;439;446;448;455;473;512	0	304.2	By MS/MS	By MS/MS	By MS/MS	By MS/MS	By MS/MS	By MS/MS	27.9	20.9	16.5	27.3	45	35.5
CON__P13645;A2A513;CON__P02535-1;P02535;CON__Q7Z3Z0;CON__Q7Z3Y8;CON__Q2M2I5	CON__P13645	23;9;9;9;2;2;2	19;7;7;7;1;1;1	15;5;5;5;0;0;0				7	23	19	15	19	22	18	19	22	20	15	18	14	15	18	16	12	14	12	12	14	13	31	26.8	23.3	59.51	593	593;561;570;570;450;459;525	0	229.75	By MS/MS	By MS/MS	By MS/MS	By MS/MS	By MS/MS	By MS/MS	26.8	28.8	26.3	26.1	30.7	28.5
CON__P13646-1	CON__P13646-1	10	1	0				1	10	1	0	4	3	2	3	10	10	0	0	0	0	1	1	0	0	0	0	0	0	19.9	2	0	49.586	458	458	1	-2	By matching	By matching	By matching	By matching	By matching	By MS/MS	7.2	4.6	5.5	5.2	19.9	19.9
CON__P13647	CON__P13647	28	25	3				1	28	25	3	16	18	16	21	27	20	14	16	13	18	24	17	3	2	3	3	3	3	38.1	36.4	6.3	62.378	590	590	0	179.19	By MS/MS	By MS/MS	By MS/MS	By MS/MS	By MS/MS	By MS/MS	24.4	25.9	22.9	30.5	38.1	28.6
CON__P19013	CON__P19013	8	3	2				1	8	3	2	2	3	3	3	7	5	0	0	0	0	3	3	0	0	0	0	2	2	10.6	4.5	3	63.91	594	594	0	17.048	By matching	By matching	By matching	By matching	By MS/MS	By matching	3.2	4	4.5	4	9.4	7.7
CON__P35527	CON__P35527	21	20	20				1	21	20	20	19	19	16	19	21	21	18	18	15	18	20	20	18	18	15	18	20	20	37.4	36.3	36.3	62.129	623	623	0	323.31	By MS/MS	By MS/MS	By MS/MS	By MS/MS	By MS/MS	By MS/MS	30	35	24.9	36	37.4	37.4
CON__P35908;CON__Q6NXH9;CON__Q7Z794;Q6IFZ9;Q6NXH9	CON__P35908	27;4;4;4;4	22;1;0;1;1	14;0;0;0;0				5	27	22	14	16	26	19	22	24	20	13	21	16	19	20	18	10	13	12	13	12	12	42.2	37.7	27.3	65.865	645	645;539;578;495;539	0	323.31	By MS/MS	By MS/MS	By MS/MS	By MS/MS	By MS/MS	By MS/MS	28.7	40.3	32.1	38.3	39.2	33.2
CON__Q01546	CON__Q01546	8	1	0				1	8	1	0	2	7	2	5	6	4	0	0	0	0	0	0	0	0	0	0	0	0	8	1.4	0	65.87	638	638	1	-2	By matching	By matching	By matching	By matching	By matching	By matching	2.4	6.6	2.4	4.9	6.6	3.9
CON__Q04695;CON__Q9QWL7;Q9QWL7;CON__Q9C075;CON__Q99PS0;Q99PS0	CON__Q04695;CON__Q9QWL7;Q9QWL7	15;13;13;1;1;1	3;3;3;1;1;1	2;2;2;1;1;1	Keratin, type I cytoskeletal 17	Krt17	;;sp|Q9QWL7|K1C17_MOUSE Keratin, type I cytoskeletal 17 OS=Mus musculus OX=10090 GN=Krt17 PE=1 SV=3	6	15	3	2	10	11	6	8	15	14	2	0	0	0	3	3	1	0	0	0	2	2	28.2	7.4	4.6	48.105	432	432;433;433;422;422;422	0	28.854	By matching	By matching	By matching	By matching	By MS/MS	By MS/MS	19.9	20.6	10.2	15.5	28.2	28
CON__Q14CN4-1;CON__Q6IME9;Q6IME9	CON__Q14CN4-1;CON__Q6IME9;Q6IME9	5;5;5	1;1;1	0;0;0	Keratin, type II cytoskeletal 72	Krt72	;;sp|Q6IME9|K2C72_MOUSE Keratin, type II cytoskeletal 72 OS=Mus musculus OX=10090 GN=Krt72 PE=3 SV=1	3	5	1	0	2	5	0	4	4	2	1	1	0	1	1	1	0	0	0	0	0	0	7.4	2.3	0	55.877	511	511;520;520	0	11.912	By matching	By matching		By matching	By MS/MS	By matching	4.1	7.4	0	7	7.4	4.1
CON__Q61782	CON__Q61782	4	1	1				1	4	1	1	1	2	0	1	4	2	0	0	0	0	1	0	0	0	0	0	1	0	45.2	10.8	10.8	10.662	93	93	0	6.4607	By matching	By matching		By matching	By MS/MS	By matching	9.7	33.3	0	23.7	45.2	33.3
CON__Q6IFX2;Q6IFX2	CON__Q6IFX2;Q6IFX2	10;10	1;1	0;0	Keratin, type I cytoskeletal 42	Krt42	;sp|Q6IFX2|K1C42_MOUSE Keratin, type I cytoskeletal 42 OS=Mus musculus OX=10090 GN=Krt42 PE=1 SV=1	2	10	1	0	5	6	2	7	10	9	0	0	0	0	1	1	0	0	0	0	0	0	18.8	1.8	0	50.133	452	452;452	1	-2	By matching	By matching	By matching	By matching	By MS/MS	By matching	10.4	12.4	3.5	14.8	18.8	18.6
CON__Q6KB66-1;Q3TBQ1;A0A2R8VHR6;CON__Q0VBK2;Q0VBK2	CON__Q6KB66-1;Q3TBQ1;A0A2R8VHR6;CON__Q0VBK2;Q0VBK2	2;1;1;1;1	2;1;1;1;1	2;1;1;1;1	Keratin, type II cytoskeletal 80	Krt80	;tr|Q3TBQ1|Q3TBQ1_MOUSE Keratin, type II cytoskeletal 80 OS=Mus musculus OX=10090 GN=Krt80 PE=1 SV=1;tr|A0A2R8VHR6|A0A2R8VHR6_MOUSE Keratin, type II cytoskeletal 80 OS=Mus musculus OX=10090 GN=Krt80 PE=1 SV=1;;sp|Q0VBK2|K2C80_MOUSE Keratin, type II cytoske	5	2	2	2	0	0	1	2	2	0	0	0	1	2	2	0	0	0	1	2	2	0	4.2	4.2	4.2	50.525	452	452;221;399;452;452	0	13.681			By matching	By MS/MS	By MS/MS		0	0	2.2	4.2	4.2	0
CON__Q8N1N4-2;CON__Q7RTT2	CON__Q8N1N4-2;CON__Q7RTT2	3;3	1;1	1;1			;	2	3	1	1	2	1	3	2	3	2	0	0	1	1	1	0	0	0	1	1	1	0	4.8	1.5	1.5	56.964	521	521;521	0	6.6412	By matching	By matching	By matching	By matching	By MS/MS	By matching	3.3	1.3	4.8	2.9	4.8	3.3
CON__Q7Z3Y7;CON__Q148H6	CON__Q7Z3Y7;CON__Q148H6	5;4	1;1	1;1			;	2	5	1	1	4	5	4	4	5	3	1	1	1	1	1	0	1	1	1	1	1	0	7.2	1.9	1.9	53.025	486	486;464	1	-2	By MS/MS	By MS/MS	By matching	By matching	By matching	By matching	7	7.2	7	7	7.2	5.1
CON__Q86YZ3	CON__Q86YZ3	6	6	6				1	6	6	6	2	4	2	6	6	6	2	4	2	6	6	6	2	4	2	6	6	6	5.7	5.7	5.7	282.39	2850	2850	0	143.74	By matching	By MS/MS	By matching	By MS/MS	By MS/MS	By MS/MS	2.6	5	2.6	5.7	5.7	5.7
CON__Streptavidin	CON__Streptavidin	4	4	4				1	4	4	4	4	4	4	4	3	4	4	4	4	4	3	4	4	4	4	4	3	4	43.1	43.1	43.1	16.622	160	160	0	60.788	By MS/MS	By MS/MS	By MS/MS	By matching	By MS/MS	By MS/MS	43.1	43.1	43.1	43.1	30	43.1
D3YU17;Q8VCM8	D3YU17;Q8VCM8	3;3	3;3	3;3	Nicalin	Ncln	tr|D3YU17|D3YU17_MOUSE Nicalin OS=Mus musculus OX=10090 GN=Ncln PE=1 SV=1;sp|Q8VCM8|NCLN_MOUSE Nicalin OS=Mus musculus OX=10090 GN=Ncln PE=1 SV=2	2	3	3	3	2	3	2	0	0	1	2	3	2	0	0	1	2	3	2	0	0	1	6	6	6	62.779	562	562;563	0	19.839	By MS/MS	By MS/MS	By MS/MS			By MS/MS	4.4	6	4.1	0	0	1.6
D3YUJ1;Q9CY62	D3YUJ1;Q9CY62	1;1	1;1	1;1	E3 ubiquitin-protein ligase RNF181	Rnf181	tr|D3YUJ1|D3YUJ1_MOUSE E3 ubiquitin-protein ligase RNF181 OS=Mus musculus OX=10090 GN=Rnf181 PE=1 SV=1;sp|Q9CY62|RN181_MOUSE E3 ubiquitin-protein ligase RNF181 OS=Mus musculus OX=10090 GN=Rnf181 PE=1 SV=1	2	1	1	1	1	1	1	1	1	1	1	1	1	1	1	1	1	1	1	1	1	1	3.9	3.9	3.9	23.02	206	206;165	0.0054585	6.0036	By MS/MS	By MS/MS	By MS/MS	By matching	By MS/MS	By MS/MS	3.9	3.9	3.9	3.9	3.9	3.9
D3YUQ9;E9QN08;Q80T06;P57776;D3YZT9;A0A0R4J1E2;D3Z7N2;A0A0R4J1L2;Q91VK2;F6ZFU0;D3YY68	D3YUQ9;E9QN08;Q80T06;P57776;D3YZT9;A0A0R4J1E2;D3Z7N2;A0A0R4J1L2;Q91VK2;F6ZFU0	6;6;6;6;5;5;4;4;4;3;2	6;6;6;6;5;5;4;4;4;3;2	6;6;6;6;5;5;4;4;4;3;2	Elongation factor 1-delta	Eef1d	tr|D3YUQ9|D3YUQ9_MOUSE Elongation factor 1-delta (Fragment) OS=Mus musculus OX=10090 GN=Eef1d PE=1 SV=8;tr|E9QN08|E9QN08_MOUSE Elongation factor 1-delta (Fragment) OS=Mus musculus OX=10090 GN=Eef1d PE=1 SV=1;tr|Q80T06|Q80T06_MOUSE Elongation factor 1-delta	11	6	6	6	5	6	4	3	3	3	5	6	4	3	3	3	5	6	4	3	3	3	42.5	42.5	42.5	21.478	193	193;245;281;281;210;660;129;257;276;552;190	0	61.855	By MS/MS	By MS/MS	By MS/MS	By MS/MS	By matching	By MS/MS	30.1	42.5	25.4	18.7	25.4	18.1
D3YV80;E9QNH6;E9Q580;Q7TQD7;P46735	D3YV80;E9QNH6;E9Q580;Q7TQD7;P46735	2;2;2;2;2	2;2;2;2;2	2;2;2;2;2	Unconventional myosin-Ib	Myo1b	tr|D3YV80|D3YV80_MOUSE Unconventional myosin-Ib (Fragment) OS=Mus musculus OX=10090 GN=Myo1b PE=1 SV=1;tr|E9QNH6|E9QNH6_MOUSE Unconventional myosin-Ib OS=Mus musculus OX=10090 GN=Myo1b PE=1 SV=1;tr|E9Q580|E9Q580_MOUSE Unconventional myosin-Ib OS=Mus muscul	5	2	2	2	2	2	2	0	0	0	2	2	2	0	0	0	2	2	2	0	0	0	7	7	7	33.738	299	299;1078;1084;1136;1107	0	12.425	By matching	By MS/MS	By MS/MS				7	7	7	0	0	0
D3YVB4;D3Z712;F8WJ41;P62245	D3YVB4;D3Z712;F8WJ41;P62245	1;1;1;1	1;1;1;1	1;1;1;1	40S ribosomal protein S15a	Rps15a	tr|D3YVB4|D3YVB4_MOUSE 40S ribosomal protein S15a (Fragment) OS=Mus musculus OX=10090 GN=Rps15a PE=1 SV=1;tr|D3Z712|D3Z712_MOUSE 40S ribosomal protein S15a (Fragment) OS=Mus musculus OX=10090 GN=Rps15a PE=1 SV=2;tr|F8WJ41|F8WJ41_MOUSE 40S ribosomal protein	4	1	1	1	1	1	1	1	1	1	1	1	1	1	1	1	1	1	1	1	1	1	12.7	12.7	12.7	8.1066	71	71;78;108;130	0	6.6584	By MS/MS	By MS/MS	By MS/MS	By matching	By matching	By MS/MS	12.7	12.7	12.7	12.7	12.7	12.7
D3YW26;D3Z4Z0	D3YW26;D3Z4Z0	1;1	1;1	1;1		Tada2b	tr|D3YW26|D3YW26_MOUSE Transcriptional adaptor 2B OS=Mus musculus OX=10090 GN=Tada2b PE=1 SV=1;tr|D3Z4Z0|D3Z4Z0_MOUSE Transcriptional adapter OS=Mus musculus OX=10090 GN=Tada2b PE=1 SV=1	2	1	1	1	1	1	1	1	1	0	1	1	1	1	1	0	1	1	1	1	1	0	3.2	3.2	3.2	40.001	345	345;420	0.0053248	5.9335	By matching	By MS/MS	By matching	By matching	By matching		3.2	3.2	3.2	3.2	3.2	0
D3YW40;O08915	D3YW40;O08915	1;1	1;1	1;1	AH receptor-interacting protein	Aip	tr|D3YW40|D3YW40_MOUSE AH receptor-interacting protein (Fragment) OS=Mus musculus OX=10090 GN=Aip PE=1 SV=1;sp|O08915|AIP_MOUSE AH receptor-interacting protein OS=Mus musculus OX=10090 GN=Aip PE=1 SV=1	2	1	1	1	1	1	1	0	0	1	1	1	1	0	0	1	1	1	1	0	0	1	8.7	8.7	8.7	19.472	172	172;330	0.0011494	6.1336	By matching	By MS/MS	By MS/MS			By matching	8.7	8.7	8.7	0	0	8.7
D3YWT1;D3Z3N4	D3YWT1;D3Z3N4	4;4	4;4	4;4		Hnrnph3	tr|D3YWT1|D3YWT1_MOUSE Heterogeneous nuclear ribonucleoprotein H3 OS=Mus musculus OX=10090 GN=Hnrnph3 PE=1 SV=1;tr|D3Z3N4|D3Z3N4_MOUSE Heterogeneous nuclear ribonucleoprotein H3 OS=Mus musculus OX=10090 GN=Hnrnph3 PE=1 SV=1	2	4	4	4	3	3	4	4	4	4	3	3	4	4	4	4	3	3	4	4	4	4	13.6	13.6	13.6	35.181	331	331;346	0	35.455	By MS/MS	By MS/MS	By MS/MS	By matching	By MS/MS	By MS/MS	10	10	13.6	13.6	13.6	13.6
D3YX34;E9Q586;E9Q3M3;O08788	D3YX34;E9Q586;E9Q3M3;O08788	3;3;3;3	3;3;3;3	3;3;3;3	Dynactin subunit 1	Dctn1	tr|D3YX34|D3YX34_MOUSE Dynactin subunit 1 OS=Mus musculus OX=10090 GN=Dctn1 PE=1 SV=1;tr|E9Q586|E9Q586_MOUSE Dynactin subunit 1 OS=Mus musculus OX=10090 GN=Dctn1 PE=1 SV=1;tr|E9Q3M3|E9Q3M3_MOUSE Dynactin subunit 1 OS=Mus musculus OX=10090 GN=Dctn1 PE=1 SV=	4	3	3	3	2	2	3	0	0	0	2	2	3	0	0	0	2	2	3	0	0	0	2.7	2.7	2.7	126.82	1142	1142;1239;1264;1281	0	20.592	By MS/MS	By MS/MS	By MS/MS				1.9	1.9	2.7	0	0	0
G3UX97;D3Z342;D3YZN4;D3YXB7;Q3ULF4	G3UX97;D3Z342;D3YZN4;D3YXB7;Q3ULF4	1;1;1;1;1	1;1;1;1;1	1;1;1;1;1	Paraplegin	Spg7	tr|G3UX97|G3UX97_MOUSE Paraplegin (Fragment) OS=Mus musculus OX=10090 GN=Spg7 PE=1 SV=1;tr|D3Z342|D3Z342_MOUSE Paraplegin (Fragment) OS=Mus musculus OX=10090 GN=Spg7 PE=1 SV=1;tr|D3YZN4|D3YZN4_MOUSE Paraplegin OS=Mus musculus OX=10090 GN=Spg7 PE=1 SV=1;tr|	5	1	1	1	1	1	1	0	0	0	1	1	1	0	0	0	1	1	1	0	0	0	5.3	5.3	5.3	23.14	209	209;230;676;744;781	0	6.9472	By MS/MS	By matching	By matching				5.3	5.3	5.3	0	0	0
D3YXZ3;Q91YS4;D3Z5Y7;O88448	D3YXZ3;Q91YS4;D3Z5Y7;O88448	2;2;1;1	2;2;1;1	2;2;1;1	Kinesin light chain 2	Klc2	tr|D3YXZ3|D3YXZ3_MOUSE Kinesin light chain 2 OS=Mus musculus OX=10090 GN=Klc2 PE=1 SV=1;tr|Q91YS4|Q91YS4_MOUSE Kinesin light chain 2 OS=Mus musculus OX=10090 GN=Klc2 PE=1 SV=1;tr|D3Z5Y7|D3Z5Y7_MOUSE Kinesin light chain 2 (Fragment) OS=Mus musculus OX=10090	4	2	2	2	2	2	2	1	0	0	2	2	2	1	0	0	2	2	2	1	0	0	4.5	4.5	4.5	68.176	617	617;619;166;599	0	11.672	By MS/MS	By MS/MS	By MS/MS	By matching			4.5	4.5	4.5	2.8	0	0
D6RH49;D3YYB0;Q6ZWY3	D6RH49;D3YYB0;Q6ZWY3	1;1;1	1;1;1	1;1;1	40S ribosomal protein S27;40S ribosomal protein S27-like	Rps27l	tr|D6RH49|D6RH49_MOUSE 40S ribosomal protein S27 OS=Mus musculus OX=10090 GN=Rps27l PE=1 SV=1;tr|D3YYB0|D3YYB0_MOUSE 40S ribosomal protein S27 OS=Mus musculus OX=10090 GN=Rps27l PE=1 SV=1;sp|Q6ZWY3|RS27L_MOUSE 40S ribosomal protein S27-like OS=Mus musculus	3	1	1	1	1	1	1	0	1	0	1	1	1	0	1	0	1	1	1	0	1	0	14.3	14.3	14.3	8.6191	77	77;105;84	0	9.0873	By MS/MS	By MS/MS	By MS/MS		By matching		14.3	14.3	14.3	0	14.3	0
D3YZ09;Q9CY66	D3YZ09;Q9CY66	1;1	1;1	1;1	H/ACA ribonucleoprotein complex subunit 1	Gar1	tr|D3YZ09|D3YZ09_MOUSE H/ACA ribonucleoprotein complex subunit (Fragment) OS=Mus musculus OX=10090 GN=Gar1 PE=1 SV=1;sp|Q9CY66|GAR1_MOUSE H/ACA ribonucleoprotein complex subunit 1 OS=Mus musculus OX=10090 GN=Gar1 PE=1 SV=1	2	1	1	1	1	1	1	1	1	1	1	1	1	1	1	1	1	1	1	1	1	1	4.5	4.5	4.5	20.448	198	198;231	0.0091837	5.8428	By MS/MS	By MS/MS	By MS/MS	By matching	By matching	By matching	4.5	4.5	4.5	4.5	4.5	4.5
D3YZ57;E9Q696;F8WI90;P06240;P39688;Q04736;P05480	D3YZ57;E9Q696;F8WI90;P06240;P39688;Q04736;P05480	1;1;1;1;1;1;1	1;1;1;1;1;1;1	1;1;1;1;1;1;1	Non-specific protein-tyrosine kinase;Proto-oncogene tyrosine-protein kinase LCK;Tyrosine-protein kinase Fyn;Tyrosine-protein kinase Yes;Neuronal proto-oncogene tyrosine-protein kinase Src	Fyn;Lck;Yes1;Src	tr|D3YZ57|D3YZ57_MOUSE Tyrosine-protein kinase OS=Mus musculus OX=10090 GN=Fyn PE=1 SV=1;tr|E9Q696|E9Q696_MOUSE Tyrosine-protein kinase OS=Mus musculus OX=10090 GN=Lck PE=1 SV=1;tr|F8WI90|F8WI90_MOUSE Tyrosine-protein kinase OS=Mus musculus OX=10090 GN=Src	7	1	1	1	1	1	1	0	0	0	1	1	1	0	0	0	1	1	1	0	0	0	2.1	2.1	2.1	54.426	482	482;520;535;509;537;541;541	0.0011779	6.2274	By matching	By matching	By MS/MS				2.1	2.1	2.1	0	0	0
D3YZA1;D3Z7T7;E9PW20;Q9CY57	D3YZA1;D3Z7T7;E9PW20;Q9CY57	1;1;1;1	1;1;1;1	1;1;1;1	Chromatin target of PRMT1 protein	Chtop	tr|D3YZA1|D3YZA1_MOUSE Chromatin target of PRMT1 protein (Fragment) OS=Mus musculus OX=10090 GN=Chtop PE=1 SV=8;tr|D3Z7T7|D3Z7T7_MOUSE Chromatin target of PRMT1 protein (Fragment) OS=Mus musculus OX=10090 GN=Chtop PE=1 SV=1;tr|E9PW20|E9PW20_MOUSE Chromatin	4	1	1	1	1	1	1	1	1	1	1	1	1	1	1	1	1	1	1	1	1	1	10.6	10.6	10.6	13.447	123	123;195;203;249	0	14.978	By MS/MS	By MS/MS	By MS/MS	By MS/MS	By MS/MS	By MS/MS	10.6	10.6	10.6	10.6	10.6	10.6
D3YZT4;D6REF7;Q8R0X7	D3YZT4;D6REF7;Q8R0X7	1;1;1	1;1;1	1;1;1	Sphingosine-1-phosphate lyase 1	Sgpl1	tr|D3YZT4|D3YZT4_MOUSE Sphingosine-1-phosphate lyase 1 (Fragment) OS=Mus musculus OX=10090 GN=Sgpl1 PE=1 SV=1;tr|D6REF7|D6REF7_MOUSE Sphingosine-1-phosphate lyase 1 OS=Mus musculus OX=10090 GN=Sgpl1 PE=1 SV=1;sp|Q8R0X7|SGPL1_MOUSE Sphingosine-1-phosphate l	3	1	1	1	1	1	1	0	1	1	1	1	1	0	1	1	1	1	1	0	1	1	7.5	7.5	7.5	22.977	199	199;487;568	0	6.3469	By matching	By MS/MS	By matching		By matching	By matching	7.5	7.5	7.5	0	7.5	7.5
D3YZX3;E9QKR0;P62880;P62874;H3BLF7;D3Z1T4;D3Z1M1;E9PWM7;H3BKR2;Q61011;P29387	D3YZX3;E9QKR0;P62880;P62874;H3BLF7;D3Z1T4;D3Z1M1;E9PWM7;H3BKR2;Q61011;P29387	2;2;2;2;1;1;1;1;1;1;1	2;2;2;2;1;1;1;1;1;1;1	2;2;2;2;1;1;1;1;1;1;1	Guanine nucleotide-binding protein G(I)/G(S)/G(T) subunit beta-2;Guanine nucleotide-binding protein G(I)/G(S)/G(T) subunit beta-1;Guanine nucleotide-binding protein G(I)/G(S)/G(T) subunit beta-3;Guanine nucleotide-binding protein subunit beta-4	Gnb2;Gnb1;Gnb3;Gnb4	tr|D3YZX3|D3YZX3_MOUSE Guanine nucleotide-binding protein G(I)/G(S)/G(T) subunit beta-2 OS=Mus musculus OX=10090 GN=Gnb2 PE=1 SV=1;tr|E9QKR0|E9QKR0_MOUSE Guanine nucleotide-binding protein G(I)/G(S)/G(T) subunit beta-2 OS=Mus musculus OX=10090 GN=Gnb2 PE=1	11	2	2	2	2	2	2	2	2	2	2	2	2	2	2	2	2	2	2	2	2	2	6.8	6.8	6.8	32.408	296	296;382;340;340;108;188;227;240;273;340;340	0	12.654	By MS/MS	By MS/MS	By MS/MS	By matching	By MS/MS	By MS/MS	6.8	6.8	6.8	6.8	6.8	6.8
F6WNZ2;D3Z041;Q8JZR0;P41216	F6WNZ2;D3Z041;Q8JZR0;P41216	1;1;1;1	1;1;1;1	1;1;1;1	Long-chain-fatty-acid--CoA ligase 5;Long-chain-fatty-acid--CoA ligase 1	Acsl1;Acsl5	tr|F6WNZ2|F6WNZ2_MOUSE Long-chain-fatty-acid--CoA ligase 1 (Fragment) OS=Mus musculus OX=10090 GN=Acsl1 PE=1 SV=1;tr|D3Z041|D3Z041_MOUSE Long-chain-fatty-acid--CoA ligase 1 OS=Mus musculus OX=10090 GN=Acsl1 PE=1 SV=1;sp|Q8JZR0|ACSL5_MOUSE Long-chain-fatty-	4	1	1	1	1	1	1	0	0	0	1	1	1	0	0	0	1	1	1	0	0	0	11.6	11.6	11.6	10.827	95	95;699;683;699	0	6.5094	By MS/MS	By matching	By matching				11.6	11.6	11.6	0	0	0
D3Z0D8;P11157	D3Z0D8;P11157	1;1	1;1	1;1	Ribonucleoside-diphosphate reductase subunit M2	Rrm2	tr|D3Z0D8|D3Z0D8_MOUSE Ribonucleoside-diphosphate reductase subunit M2 (Fragment) OS=Mus musculus OX=10090 GN=Rrm2 PE=1 SV=1;sp|P11157|RIR2_MOUSE Ribonucleoside-diphosphate reductase subunit M2 OS=Mus musculus OX=10090 GN=Rrm2 PE=1 SV=1	2	1	1	1	1	1	1	0	0	0	1	1	1	0	0	0	1	1	1	0	0	0	6.2	6.2	6.2	26.028	225	225;390	0.0053135	5.9324	By matching	By matching	By MS/MS				6.2	6.2	6.2	0	0	0
D3Z0M9	D3Z0M9	1	1	1		Ddx23	tr|D3Z0M9|D3Z0M9_MOUSE DEAD (Asp-Glu-Ala-Asp) box polypeptide 23 OS=Mus musculus OX=10090 GN=Ddx23 PE=1 SV=1	1	1	1	1	1	1	1	1	1	1	1	1	1	1	1	1	1	1	1	1	1	1	1.3	1.3	1.3	95.493	819	819	0	6.3346	By matching	By matching	By MS/MS	By matching	By matching	By matching	1.3	1.3	1.3	1.3	1.3	1.3
D3Z0S6;Q62189;D6RI83;F8VQ88	D3Z0S6;Q62189;D6RI83;F8VQ88	2;2;1;1	2;2;1;1	2;2;1;1	U1 small nuclear ribonucleoprotein A	Snrpa;Gm5145	tr|D3Z0S6|D3Z0S6_MOUSE U1 small nuclear ribonucleoprotein A (Fragment) OS=Mus musculus OX=10090 GN=Snrpa PE=1 SV=1;sp|Q62189|SNRPA_MOUSE U1 small nuclear ribonucleoprotein A OS=Mus musculus OX=10090 GN=Snrpa PE=1 SV=3;tr|D6RI83|D6RI83_MOUSE U1 small nuclea	4	2	2	2	2	1	2	2	1	1	2	1	2	2	1	1	2	1	2	2	1	1	8.1	8.1	8.1	27.372	247	247;287;44;278	0	12.814	By MS/MS	By MS/MS	By MS/MS	By matching	By MS/MS	By MS/MS	8.1	3.2	8.1	8.1	3.2	3.2
D3Z1Y6;Q9D0F6	D3Z1Y6;Q9D0F6	1;1	1;1	1;1	Replication factor C subunit 5	Rfc5	tr|D3Z1Y6|D3Z1Y6_MOUSE Replication factor C subunit 5 OS=Mus musculus OX=10090 GN=Rfc5 PE=1 SV=1;sp|Q9D0F6|RFC5_MOUSE Replication factor C subunit 5 OS=Mus musculus OX=10090 GN=Rfc5 PE=1 SV=1	2	1	1	1	1	1	0	0	0	1	1	1	0	0	0	1	1	1	0	0	0	1	12.5	12.5	12.5	12.433	112	112;339	0	6.7238	By MS/MS	By matching				By matching	12.5	12.5	0	0	0	12.5
D3Z2H7;E9Q986;D3Z7H6;E9Q907;E9Q905;E9Q8Z4;E9Q8Z9;D3Z2H2;E9Q901;E9Q904;G3X9V2;E9Q8Z6;E9Q8Z8;P30999	D3Z2H7;E9Q986;D3Z7H6;E9Q907;E9Q905;E9Q8Z4;E9Q8Z9;D3Z2H2;E9Q901;E9Q904;G3X9V2;E9Q8Z6;E9Q8Z8;P30999	1;1;1;1;1;1;1;1;1;1;1;1;1;1	1;1;1;1;1;1;1;1;1;1;1;1;1;1	1;1;1;1;1;1;1;1;1;1;1;1;1;1	Catenin delta-1	Ctnnd1	tr|D3Z2H7|D3Z2H7_MOUSE Catenin delta-1 OS=Mus musculus OX=10090 GN=Ctnnd1 PE=1 SV=1;tr|E9Q986|E9Q986_MOUSE Catenin delta-1 OS=Mus musculus OX=10090 GN=Ctnnd1 PE=1 SV=1;tr|D3Z7H6|D3Z7H6_MOUSE Catenin delta-1 OS=Mus musculus OX=10090 GN=Ctnnd1 PE=1 SV=1;tr|E	14	1	1	1	0	0	1	0	0	0	0	0	1	0	0	0	0	0	1	0	0	0	2	2	2	67.935	609	609;830;837;860;866;868;878;884;907;913;932;961;967;938	0	10.84			By MS/MS				0	0	2	0	0	0
D3Z2M0;G3UXB4;Q3U308	D3Z2M0;G3UXB4;Q3U308	2;2;2	2;2;2	2;2;2	Cytoplasmic tRNA 2-thiolation protein 2	Ctu2	tr|D3Z2M0|D3Z2M0_MOUSE Cytoplasmic tRNA 2-thiolation protein 2 (Fragment) OS=Mus musculus OX=10090 GN=Ctu2 PE=1 SV=1;tr|G3UXB4|G3UXB4_MOUSE Cytoplasmic tRNA 2-thiolation protein 2 OS=Mus musculus OX=10090 GN=Ctu2 PE=1 SV=1;sp|Q3U308|CTU2_MOUSE Cytoplasmic	3	2	2	2	2	2	2	0	0	0	2	2	2	0	0	0	2	2	2	0	0	0	10.8	10.8	10.8	27.294	249	249;410;514	0	18.53	By MS/MS	By MS/MS	By MS/MS				10.8	10.8	10.8	0	0	0
D3Z2T9;P11440	D3Z2T9;P11440	2;2	1;1	1;1	Cyclin-dependent kinase 1	Cdk1	tr|D3Z2T9|D3Z2T9_MOUSE Cyclin-dependent kinase 1 (Fragment) OS=Mus musculus OX=10090 GN=Cdk1 PE=1 SV=1;sp|P11440|CDK1_MOUSE Cyclin-dependent kinase 1 OS=Mus musculus OX=10090 GN=Cdk1 PE=1 SV=3	2	2	1	1	1	2	1	0	1	1	0	1	0	0	0	0	0	1	0	0	0	0	9	5	5	22.893	200	200;297	0.0054407	6	By matching	By MS/MS	By matching		By matching	By matching	4	9	4	0	4	4
D3Z313;Q9DCC5;P23198;D3Z1A9	D3Z313;Q9DCC5;P23198;D3Z1A9	2;2;2;1	2;2;2;1	2;2;2;1	Chromobox protein homolog 3	Cbx3	tr|D3Z313|D3Z313_MOUSE Chromobox protein homolog 3 (Fragment) OS=Mus musculus OX=10090 GN=Cbx3 PE=1 SV=1;tr|Q9DCC5|Q9DCC5_MOUSE Cbx3 protein OS=Mus musculus OX=10090 GN=Cbx3 PE=1 SV=1;sp|P23198|CBX3_MOUSE Chromobox protein homolog 3 OS=Mus musculus OX=1009	4	2	2	2	2	2	2	0	1	2	2	2	2	0	1	2	2	2	2	0	1	2	22.7	22.7	22.7	12.557	110	110;183;183;71	0	15.602	By matching	By MS/MS	By MS/MS		By matching	By matching	22.7	22.7	22.7	0	12.7	22.7
D3Z3A8;Q8C170	D3Z3A8;Q8C170	1;1	1;1	1;1	Unconventional myosin-IXa	Myo9a	tr|D3Z3A8|D3Z3A8_MOUSE Unconventional myosin-IXa OS=Mus musculus OX=10090 GN=Myo9a PE=1 SV=1;sp|Q8C170|MYO9A_MOUSE Unconventional myosin-IXa OS=Mus musculus OX=10090 GN=Myo9a PE=1 SV=2	2	1	1	1	1	1	1	0	0	0	1	1	1	0	0	0	1	1	1	0	0	0	0.7	0.7	0.7	301.83	2631	2631;2542	0	6.9981	By MS/MS	By MS/MS	By MS/MS				0.7	0.7	0.7	0	0	0
D3Z3G6;Q63844	D3Z3G6;Q63844	1;1	1;1	1;1	Mitogen-activated protein kinase;Mitogen-activated protein kinase 3	Mapk3	tr|D3Z3G6|D3Z3G6_MOUSE Mitogen-activated protein kinase OS=Mus musculus OX=10090 GN=Mapk3 PE=1 SV=1;sp|Q63844|MK03_MOUSE Mitogen-activated protein kinase 3 OS=Mus musculus OX=10090 GN=Mapk3 PE=1 SV=5	2	1	1	1	1	1	1	1	0	0	1	1	1	1	0	0	1	1	1	1	0	0	3.9	3.9	3.9	42.401	380	380;380	0	6.8896	By MS/MS	By MS/MS	By MS/MS	By matching			3.9	3.9	3.9	3.9	0	0
F6XLZ3;D3Z3S1;Q9WUQ2	F6XLZ3;D3Z3S1;Q9WUQ2	1;1;1	1;1;1	1;1;1	Prolactin regulatory element-binding protein	Preb	tr|F6XLZ3|F6XLZ3_MOUSE Prolactin regulatory element-binding protein (Fragment) OS=Mus musculus OX=10090 GN=Preb PE=1 SV=1;tr|D3Z3S1|D3Z3S1_MOUSE Prolactin regulatory element binding, isoform CRA_b OS=Mus musculus OX=10090 GN=Preb PE=1 SV=1;sp|Q9WUQ2|PREB_M	3	1	1	1	1	1	1	0	0	0	1	1	1	0	0	0	1	1	1	0	0	0	13.7	13.7	13.7	10.167	95	95;350;417	0	7.6119	By matching	By MS/MS	By MS/MS				13.7	13.7	13.7	0	0	0
D3Z4I4;Q9CZW4	D3Z4I4;Q9CZW4	1;1	1;1	1;1	Long-chain-fatty-acid--CoA ligase 3	Acsl3	tr|D3Z4I4|D3Z4I4_MOUSE Long-chain-fatty-acid--CoA ligase 3 (Fragment) OS=Mus musculus OX=10090 GN=Acsl3 PE=1 SV=1;sp|Q9CZW4|ACSL3_MOUSE Long-chain-fatty-acid--CoA ligase 3 OS=Mus musculus OX=10090 GN=Acsl3 PE=1 SV=2	2	1	1	1	1	1	1	0	0	0	1	1	1	0	0	0	1	1	1	0	0	0	9.9	9.9	9.9	16.349	141	141;720	0	7.7238	By matching	By MS/MS	By matching				9.9	9.9	9.9	0	0	0
D3Z4J5;Q9D1H7	D3Z4J5;Q9D1H7	1;1	1;1	1;1	Golgi to ER traffic protein 4 homolog	Get4	tr|D3Z4J5|D3Z4J5_MOUSE Golgi to ER traffic protein 4 homolog (Fragment) OS=Mus musculus OX=10090 GN=Get4 PE=1 SV=1;sp|Q9D1H7|GET4_MOUSE Golgi to ER traffic protein 4 homolog OS=Mus musculus OX=10090 GN=Get4 PE=1 SV=2	2	1	1	1	1	1	1	1	0	0	1	1	1	1	0	0	1	1	1	1	0	0	5.3	5.3	5.3	27.58	246	246;327	0	9.3984	By MS/MS	By MS/MS	By MS/MS	By matching			5.3	5.3	5.3	5.3	0	0
G3X9X5;D3Z5I1;Q3UPF5	G3X9X5;D3Z5I1;Q3UPF5	1;1;1	1;1;1	1;1;1	Zinc finger CCCH-type antiviral protein 1	Zc3hav1	tr|G3X9X5|G3X9X5_MOUSE Zinc finger CCCH type, antiviral 1, isoform CRA_b OS=Mus musculus OX=10090 GN=Zc3hav1 PE=1 SV=1;tr|D3Z5I1|D3Z5I1_MOUSE Zinc finger CCCH-type antiviral protein 1 OS=Mus musculus OX=10090 GN=Zc3hav1 PE=1 SV=1;sp|Q3UPF5|ZCCHV_MOUSE Zinc	3	1	1	1	1	1	1	0	1	1	1	1	1	0	1	1	1	1	1	0	1	1	1.9	1.9	1.9	76.412	673	673;996;946	0.0044248	6.0219	By matching	By MS/MS	By MS/MS		By matching	By matching	1.9	1.9	1.9	0	1.9	1.9
D3Z6I8;E9Q7Q3;D3Z2H9	D3Z6I8;E9Q7Q3;D3Z2H9	6;6;4	6;6;4	4;4;2		Tpm3;Tpm3-rs7	tr|D3Z6I8|D3Z6I8_MOUSE Tropomyosin alpha-3 chain OS=Mus musculus OX=10090 GN=Tpm3 PE=1 SV=1;tr|E9Q7Q3|E9Q7Q3_MOUSE Tropomyosin alpha-3 chain OS=Mus musculus OX=10090 GN=Tpm3 PE=1 SV=1;tr|D3Z2H9|D3Z2H9_MOUSE Uncharacterized protein OS=Mus musculus OX=10090	3	6	6	4	5	5	6	5	5	5	5	5	6	5	5	5	3	4	4	3	3	3	23.5	23.5	15.4	28.723	247	247;248;248	0	45.681	By MS/MS	By MS/MS	By MS/MS	By matching	By MS/MS	By MS/MS	17.8	18.2	23.5	17.8	17.8	17.8
D3Z6N3;Q61881	D3Z6N3;Q61881	1;1	1;1	1;1	DNA replication licensing factor MCM7	Mcm7	tr|D3Z6N3|D3Z6N3_MOUSE DNA replication licensing factor MCM7 OS=Mus musculus OX=10090 GN=Mcm7 PE=1 SV=1;sp|Q61881|MCM7_MOUSE DNA replication licensing factor MCM7 OS=Mus musculus OX=10090 GN=Mcm7 PE=1 SV=1	2	1	1	1	1	1	1	0	0	0	1	1	1	0	0	0	1	1	1	0	0	0	2.6	2.6	2.6	44.609	389	389;719	0.0082988	5.8817	By matching	By MS/MS	By matching				2.6	2.6	2.6	0	0	0
D3Z6P1;D6RCU8;Q9DCL9	D3Z6P1;D6RCU8;Q9DCL9	3;3;3	3;3;3	3;3;3	Multifunctional protein ADE2;Phosphoribosylaminoimidazole-succinocarboxamide synthase;Phosphoribosylaminoimidazole carboxylase	Paics	tr|D3Z6P1|D3Z6P1_MOUSE Multifunctional protein ADE2 (Fragment) OS=Mus musculus OX=10090 GN=Paics PE=1 SV=1;tr|D6RCU8|D6RCU8_MOUSE Multifunctional protein ADE2 OS=Mus musculus OX=10090 GN=Paics PE=1 SV=1;sp|Q9DCL9|PUR6_MOUSE Multifunctional protein ADE2 OS=	3	3	3	3	3	2	3	2	2	3	3	2	3	2	2	3	3	2	3	2	2	3	38.6	38.6	38.6	8.9944	83	83;103;425	0	20.497	By MS/MS	By MS/MS	By MS/MS	By MS/MS	By MS/MS	By MS/MS	38.6	25.3	38.6	25.3	25.3	38.6
D3Z6P3;Q8C0Z1	D3Z6P3;Q8C0Z1	1;1	1;1	1;1	Protein ITFG3	Itfg3	tr|D3Z6P3|D3Z6P3_MOUSE Protein FAM234A (Fragment) OS=Mus musculus OX=10090 GN=Fam234a PE=1 SV=8;sp|Q8C0Z1|F234A_MOUSE Protein FAM234A OS=Mus musculus OX=10090 GN=Fam234a PE=1 SV=1	2	1	1	1	1	1	1	1	1	1	1	1	1	1	1	1	1	1	1	1	1	1	9.8	9.8	9.8	11.48	102	102;555	0.0091371	5.8362	By matching	By matching	By matching	By matching	By matching	By MS/MS	9.8	9.8	9.8	9.8	9.8	9.8
E9QAT0;D3Z6U8;E9QNF5;Q6AXB7;P35922;E9QAS9;E9QAS8;Q9WVR4	E9QAT0;D3Z6U8;E9QNF5;Q6AXB7;P35922;E9QAS9;E9QAS8;Q9WVR4	2;2;2;2;2;1;1;1	1;1;1;1;1;0;0;0	1;1;1;1;1;0;0;0	Fragile X mental retardation protein 1 homolog;Fragile X mental retardation syndrome-related protein 2	Fmr1;Fxr2	tr|E9QAT0|E9QAT0_MOUSE Synaptic functional regulator FMR1 OS=Mus musculus OX=10090 GN=Fmr1 PE=1 SV=1;tr|D3Z6U8|D3Z6U8_MOUSE Synaptic functional regulator FMR1 OS=Mus musculus OX=10090 GN=Fmr1 PE=1 SV=1;tr|E9QNF5|E9QNF5_MOUSE Synaptic functional regulator F	8	2	1	1	1	2	1	2	2	2	1	1	1	1	1	1	1	1	1	1	1	1	3.9	2.5	2.5	66.169	589	589;591;593;614;614;585;631;673	0	10.098	By MS/MS	By MS/MS	By MS/MS	By matching	By matching	By matching	2.5	3.9	2.5	3.9	3.9	3.9
G3UZX6;H7BWX9;D3Z794;G3UZ60;G3UWI9;G3UWX9;G3UZA7;P61957;Q9Z172	G3UZX6;H7BWX9;D3Z794;G3UZ60;G3UWI9;G3UWX9;G3UZA7;P61957;Q9Z172	1;1;1;1;1;1;1;1;1	1;1;1;1;1;1;1;1;1	1;1;1;1;1;1;1;1;1	Small ubiquitin-related modifier;Small ubiquitin-related modifier 2;Small ubiquitin-related modifier 3	Sumo3;Sumo2	tr|G3UZX6|G3UZX6_MOUSE Small ubiquitin-related modifier 3 (Fragment) OS=Mus musculus OX=10090 GN=Sumo3 PE=4 SV=1;tr|H7BWX9|H7BWX9_MOUSE Small ubiquitin-related modifier 2 OS=Mus musculus OX=10090 GN=Sumo2 PE=1 SV=1;tr|D3Z794|D3Z794_MOUSE Small ubiquitin-re	9	1	1	1	1	1	1	0	0	0	1	1	1	0	0	0	1	1	1	0	0	0	25.5	25.5	25.5	5.2631	47	47;53;71;75;82;96;113;95;110	0	7.4793	By MS/MS	By MS/MS	By MS/MS				25.5	25.5	25.5	0	0	0
D3Z7A7;Q6ZPF4	D3Z7A7;Q6ZPF4	1;1	1;1	1;1	Formin-like protein 3	Fmnl3	tr|D3Z7A7|D3Z7A7_MOUSE Formin-like protein 3 OS=Mus musculus OX=10090 GN=Fmnl3 PE=1 SV=1;sp|Q6ZPF4|FMNL3_MOUSE Formin-like protein 3 OS=Mus musculus OX=10090 GN=Fmnl3 PE=1 SV=2	2	1	1	1	0	1	1	0	0	0	0	1	1	0	0	0	0	1	1	0	0	0	1.1	1.1	1.1	116.92	1027	1027;1028	0	8.0329		By matching	By MS/MS				0	1.1	1.1	0	0	0
D3Z7Q8;P52432;G3UXX5;D3Z3D6;G3UX92	D3Z7Q8;P52432;G3UXX5;D3Z3D6	3;3;2;2;1	3;3;2;2;1	3;3;2;2;1	DNA-directed RNA polymerases I and III subunit RPAC1	Polr1c	tr|D3Z7Q8|D3Z7Q8_MOUSE DNA-directed RNA polymerases I and III subunit RPAC1 (Fragment) OS=Mus musculus OX=10090 GN=Polr1c PE=1 SV=2;sp|P52432|RPAC1_MOUSE DNA-directed RNA polymerases I and III subunit RPAC1 OS=Mus musculus OX=10090 GN=Polr1c PE=1 SV=3;tr|G	5	3	3	3	3	3	2	0	2	1	3	3	2	0	2	1	3	3	2	0	2	1	14.1	14.1	14.1	28.684	255	255;346;170;260;103	0	18.099	By MS/MS	By MS/MS	By MS/MS		By matching	By matching	14.1	14.1	7.8	0	7.8	3.9
D6RCG1;Q64737	D6RCG1;Q64737	3;3	3;3	3;3	Trifunctional purine biosynthetic protein adenosine-3;Phosphoribosylamine--glycine ligase;Phosphoribosylformylglycinamidine cyclo-ligase;Phosphoribosylglycinamide formyltransferase	Gart	tr|D6RCG1|D6RCG1_MOUSE Trifunctional purine biosynthetic protein adenosine-3 OS=Mus musculus OX=10090 GN=Gart PE=1 SV=1;sp|Q64737|PUR2_MOUSE Trifunctional purine biosynthetic protein adenosine-3 OS=Mus musculus OX=10090 GN=Gart PE=1 SV=3	2	3	3	3	3	3	3	1	3	3	3	3	3	1	3	3	3	3	3	1	3	3	8.5	8.5	8.5	32.116	306	306;1010	0	18.002	By MS/MS	By MS/MS	By MS/MS	By matching	By matching	By matching	8.5	8.5	8.5	2.6	8.5	8.5
D6REF3;P62259	D6REF3;P62259	3;3	1;1	1;1	14-3-3 protein epsilon	Ywhae	tr|D6REF3|D6REF3_MOUSE 14-3-3 protein epsilon OS=Mus musculus OX=10090 GN=Ywhae PE=1 SV=1;sp|P62259|1433E_MOUSE 14-3-3 protein epsilon OS=Mus musculus OX=10090 GN=Ywhae PE=1 SV=1	2	3	1	1	3	3	3	3	3	3	1	1	1	1	1	1	1	1	1	1	1	1	20.8	9.2	9.2	15.219	130	130;255	0	10.642	By MS/MS	By MS/MS	By MS/MS	By matching	By matching	By matching	20.8	20.8	20.8	20.8	20.8	20.8
E0CXB1;Q9QUM9	E0CXB1;Q9QUM9	1;1	1;1	1;1	Proteasome subunit alpha type-6	Psma6	tr|E0CXB1|E0CXB1_MOUSE Proteasome endopeptidase complex OS=Mus musculus OX=10090 GN=Psma6 PE=1 SV=1;sp|Q9QUM9|PSA6_MOUSE Proteasome subunit alpha type-6 OS=Mus musculus OX=10090 GN=Psma6 PE=1 SV=1	2	1	1	1	1	1	1	1	1	0	1	1	1	1	1	0	1	1	1	1	1	0	4.4	4.4	4.4	25.264	227	227;246	0.0073222	5.9024	By matching	By matching	By MS/MS	By matching	By MS/MS		4.4	4.4	4.4	4.4	4.4	0
E0CYV3;E0CY49;Q91YI0	E0CYV3;E0CY49;Q91YI0	1;1;1	1;1;1	1;1;1	Argininosuccinate lyase	Asl	tr|E0CYV3|E0CYV3_MOUSE Argininosuccinate lyase (Fragment) OS=Mus musculus OX=10090 GN=Asl PE=1 SV=1;tr|E0CY49|E0CY49_MOUSE Argininosuccinate lyase (Fragment) OS=Mus musculus OX=10090 GN=Asl PE=1 SV=1;sp|Q91YI0|ARLY_MOUSE Argininosuccinate lyase OS=Mus musc	3	1	1	1	1	1	0	0	1	1	1	1	0	0	1	1	1	1	0	0	1	1	14.9	14.9	14.9	8.1022	74	74;262;464	0.0054645	6.0038	By matching	By MS/MS			By matching	By matching	14.9	14.9	0	0	14.9	14.9
E0CYA9;Q9CQ36	E0CYA9;Q9CQ36	1;1	1;1	1;1	DNA polymerase epsilon subunit 4	Pole4	tr|E0CYA9|E0CYA9_MOUSE DNA polymerase epsilon subunit 4 OS=Mus musculus OX=10090 GN=Pole4 PE=1 SV=1;sp|Q9CQ36|DPOE4_MOUSE DNA polymerase epsilon subunit 4 OS=Mus musculus OX=10090 GN=Pole4 PE=1 SV=1	2	1	1	1	1	1	1	0	1	0	1	1	1	0	1	0	1	1	1	0	1	0	10.1	10.1	10.1	12.455	119	119;118	0	7.6786	By MS/MS	By matching	By matching		By matching		10.1	10.1	10.1	0	10.1	0
F8WH48;E0CYH4;Q8C6G8	F8WH48;E0CYH4;Q8C6G8	1;1;1	1;1;1	1;1;1	WD repeat-containing protein 26	Wdr26	tr|F8WH48|F8WH48_MOUSE WD repeat-containing protein 26 (Fragment) OS=Mus musculus OX=10090 GN=Wdr26 PE=1 SV=1;tr|E0CYH4|E0CYH4_MOUSE WD repeat-containing protein 26 OS=Mus musculus OX=10090 GN=Wdr26 PE=1 SV=1;sp|Q8C6G8|WDR26_MOUSE WD repeat-containing prot	3	1	1	1	1	0	0	1	1	1	1	0	0	1	1	1	1	0	0	1	1	1	5.5	5.5	5.5	18.248	183	183;625;641	0	7.5117	By matching			By matching	By matching	By MS/MS	5.5	0	0	5.5	5.5	5.5
F6V9F1;F7D432;E9PWE0;E0CYV0;P23506	F6V9F1;F7D432;E9PWE0;E0CYV0;P23506	2;2;2;2;2	2;2;2;2;2	2;2;2;2;2	Protein-L-isoaspartate O-methyltransferase;Protein-L-isoaspartate(D-aspartate) O-methyltransferase	Pcmt1	tr|F6V9F1|F6V9F1_MOUSE Protein-L-isoaspartate(D-aspartate) O-methyltransferase (Fragment) OS=Mus musculus OX=10090 GN=Pcmt1 PE=1 SV=1;tr|F7D432|F7D432_MOUSE Protein-L-isoaspartate O-methyltransferase (Fragment) OS=Mus musculus OX=10090 GN=Pcmt1 PE=1 SV=1;t	5	2	2	2	2	2	2	1	1	1	2	2	2	1	1	1	2	2	2	1	1	1	10.2	10.2	10.2	18.823	177	177;271;285;286;227	0	11.432	By matching	By MS/MS	By matching	By matching	By matching	By MS/MS	10.2	10.2	10.2	6.2	6.2	4
E9PUP1;A0A0G2JEY9;A0A1D5RLX6	E9PUP1;A0A0G2JEY9;A0A1D5RLX6	3;2;2	3;2;2	3;2;2		Syde2	tr|E9PUP1|E9PUP1_MOUSE Synapse defective 1, Rho GTPase, homolog 2 (C. elegans) OS=Mus musculus OX=10090 GN=Syde2 PE=1 SV=2;tr|A0A0G2JEY9|A0A0G2JEY9_MOUSE Synapse defective 1, Rho GTPase, homolog 2 (C. elegans) OS=Mus musculus OX=10090 GN=Syde2 PE=1 SV=1;tr	3	3	3	3	3	3	2	0	0	0	3	3	2	0	0	0	3	3	2	0	0	0	3	3	3	144.63	1314	1314;1046;1047	0	17.937	By MS/MS	By MS/MS	By MS/MS				3	3	1.8	0	0	0
E9PVA2;Q9DB85	E9PVA2;Q9DB85	1;1	1;1	1;1	Ribosomal RNA-processing protein 8	Rrp8	tr|E9PVA2|E9PVA2_MOUSE Ribosomal RNA-processing protein 8 OS=Mus musculus OX=10090 GN=Rrp8 PE=1 SV=1;sp|Q9DB85|RRP8_MOUSE Ribosomal RNA-processing protein 8 OS=Mus musculus OX=10090 GN=Rrp8 PE=1 SV=1	2	1	1	1	1	1	1	0	0	1	1	1	1	0	0	1	1	1	1	0	0	1	3	3	3	56.511	503	503;457	0.0054348	5.9974	By matching	By matching	By MS/MS			By matching	3	3	3	0	0	3
E9PVA8	E9PVA8	3	3	3		Gcn1l1	sp|E9PVA8|GCN1_MOUSE eIF-2-alpha kinase activator GCN1 OS=Mus musculus OX=10090 GN=Gcn1 PE=1 SV=1	1	3	3	3	2	3	3	0	0	0	2	3	3	0	0	0	2	3	3	0	0	0	1.3	1.3	1.3	293.02	2671	2671	0	26.692	By MS/MS	By MS/MS	By MS/MS				0.9	1.3	1.3	0	0	0
E9PVD3	E9PVD3	2	2	2	Protocadherin-16	Dchs1	sp|E9PVD3|PCD16_MOUSE Protocadherin-16 OS=Mus musculus OX=10090 GN=Dchs1 PE=1 SV=1	1	2	2	2	2	2	2	0	0	0	2	2	2	0	0	0	2	2	2	0	0	0	0.7	0.7	0.7	346.38	3291	3291	0	14.199	By MS/MS	By matching	By MS/MS				0.7	0.7	0.7	0	0	0
E9PVX6	E9PVX6	5	5	5		Mki67	sp|E9PVX6|KI67_MOUSE Proliferation marker protein Ki-67 OS=Mus musculus OX=10090 GN=Mki67 PE=1 SV=1	1	5	5	5	3	4	4	3	4	4	3	4	4	3	4	4	3	4	4	3	4	4	2.5	2.5	2.5	350.86	3177	3177	0	42.648	By MS/MS	By MS/MS	By MS/MS	By matching	By MS/MS	By MS/MS	1.5	1.7	1.7	1.6	2	2
E9QAH1;E9PVZ8	E9QAH1;E9PVZ8	2;2	2;2	2;2		Golgb1	tr|E9QAH1|E9QAH1_MOUSE Golgi autoantigen, golgin subfamily b, macrogolgin 1 OS=Mus musculus OX=10090 GN=Golgb1 PE=1 SV=1;tr|E9PVZ8|E9PVZ8_MOUSE Golgi autoantigen, golgin subfamily b, macrogolgin 1 OS=Mus musculus OX=10090 GN=Golgb1 PE=1 SV=1	2	2	2	2	1	1	1	1	1	2	1	1	1	1	1	2	1	1	1	1	1	2	0.9	0.9	0.9	365.29	3197	3197;3238	0	13.027	By matching	By matching	By MS/MS	By matching	By MS/MS	By matching	0.4	0.4	0.4	0.6	0.6	0.9
E9PW15;Q80U70	E9PW15;Q80U70	1;1	1;1	1;1	Polycomb protein Suz12	Suz12	tr|E9PW15|E9PW15_MOUSE Polycomb protein Suz12 OS=Mus musculus OX=10090 GN=Suz12 PE=1 SV=1;sp|Q80U70|SUZ12_MOUSE Polycomb protein Suz12 OS=Mus musculus OX=10090 GN=Suz12 PE=1 SV=2	2	1	1	1	1	1	1	0	0	0	1	1	1	0	0	0	1	1	1	0	0	0	1.1	1.1	1.1	80.292	718	718;741	0.0073452	5.9054	By MS/MS	By MS/MS	By MS/MS				1.1	1.1	1.1	0	0	0
E9PWE8;Q3TT92;Q62188;D3YUS0;D3Z567	E9PWE8;Q3TT92;Q62188	10;7;7;2;1	10;7;7;2;1	8;5;5;1;1	Dihydropyrimidinase-related protein 3	Dpysl3	tr|E9PWE8|E9PWE8_MOUSE Dihydropyrimidinase-related protein 3 OS=Mus musculus OX=10090 GN=Dpysl3 PE=1 SV=1;tr|Q3TT92|Q3TT92_MOUSE Dihydropyrimidinase-related protein 3 OS=Mus musculus OX=10090 GN=Dpysl3 PE=1 SV=1;sp|Q62188|DPYL3_MOUSE Dihydropyrimidinase-re	5	10	10	8	9	9	7	2	8	6	9	9	7	2	8	6	7	7	5	0	6	4	16.3	16.3	12.7	73.884	683	683;568;570;216;103	0	75.233	By MS/MS	By MS/MS	By MS/MS	By matching	By MS/MS	By MS/MS	15.5	14.9	11.3	3.5	12.7	10
E9PWY9;Q8C0C7	E9PWY9;Q8C0C7	2;2	2;2	2;2	Phenylalanine--tRNA ligase alpha subunit	Farsa	tr|E9PWY9|E9PWY9_MOUSE Phenylalanine--tRNA ligase alpha subunit OS=Mus musculus OX=10090 GN=Farsa PE=1 SV=1;sp|Q8C0C7|SYFA_MOUSE Phenylalanine--tRNA ligase alpha subunit OS=Mus musculus OX=10090 GN=Farsa PE=1 SV=1	2	2	2	2	2	2	2	0	1	1	2	2	2	0	1	1	2	2	2	0	1	1	4.5	4.5	4.5	57.47	507	507;508	0	15.921	By matching	By MS/MS	By MS/MS		By matching	By matching	4.5	4.5	4.5	0	2.2	2.2
E9PX77;F8WGT1;Q68FL4	E9PX77;F8WGT1;Q68FL4	1;1;1	1;1;1	1;1;1	Adenosylhomocysteinase;Putative adenosylhomocysteinase 3	Ahcyl2	tr|E9PX77|E9PX77_MOUSE Putative adenosylhomocysteinase 3 OS=Mus musculus OX=10090 GN=Ahcyl2 PE=1 SV=1;tr|F8WGT1|F8WGT1_MOUSE Adenosylhomocysteinase OS=Mus musculus OX=10090 GN=Ahcyl2 PE=1 SV=1;sp|Q68FL4|SAHH3_MOUSE Putative adenosylhomocysteinase 3 OS=Mus	3	1	1	1	1	1	1	0	0	0	1	1	1	0	0	0	1	1	1	0	0	0	7.5	7.5	7.5	16.247	160	160;612;613	0.007431	5.9245	By matching	By matching	By MS/MS				7.5	7.5	7.5	0	0	0
E9PYL9;Q9CXW4;A2BH06;E9PZB3	E9PYL9;Q9CXW4;A2BH06	5;5;3;2	5;5;3;2	5;5;3;2	60S ribosomal protein L11	Gm10036;Rpl11	tr|E9PYL9|E9PYL9_MOUSE Uncharacterized protein OS=Mus musculus OX=10090 GN=Gm10036 PE=3 SV=1;sp|Q9CXW4|RL11_MOUSE 60S ribosomal protein L11 OS=Mus musculus OX=10090 GN=Rpl11 PE=1 SV=4;tr|A2BH06|A2BH06_MOUSE 60S ribosomal protein L11 (Fragment) OS=Mus muscu	4	5	5	5	4	4	5	2	5	4	4	4	5	2	5	4	4	4	5	2	5	4	28.1	28.1	28.1	20.266	178	178;178;172;174	0	36.343	By MS/MS	By MS/MS	By MS/MS	By matching	By MS/MS	By MS/MS	23.6	23.6	28.1	11.8	28.1	20.2
E9Q035;P47758;A0A1W2P830	E9Q035;P47758	3;3;1	3;3;1	3;3;1	Signal recognition particle receptor subunit beta	Gm20425;Srprb	tr|E9Q035|E9Q035_MOUSE Uncharacterized protein OS=Mus musculus OX=10090 GN=Gm20425 PE=4 SV=1;sp|P47758|SRPRB_MOUSE Signal recognition particle receptor subunit beta OS=Mus musculus OX=10090 GN=Srprb PE=1 SV=1	3	3	3	3	3	3	3	1	1	1	3	3	3	1	1	1	3	3	3	1	1	1	2.9	2.9	2.9	107.8	978	978;269;54	0	32.108	By MS/MS	By MS/MS	By MS/MS	By matching	By matching	By matching	2.9	2.9	2.9	0.8	0.8	0.8
E9Q066;G3X9Q6;Q8BWW4;A0A2R8W6Y5;A0A2R8VKL5;A0A2R8VHW8	E9Q066;G3X9Q6;Q8BWW4;A0A2R8W6Y5;A0A2R8VKL5	5;5;5;4;4;1	5;5;5;4;4;1	5;5;5;4;4;1	La-related protein 4	Larp4	tr|E9Q066|E9Q066_MOUSE La-related protein 4 OS=Mus musculus OX=10090 GN=Larp4 PE=1 SV=1;tr|G3X9Q6|G3X9Q6_MOUSE La-related protein 4 OS=Mus musculus OX=10090 GN=Larp4 PE=1 SV=1;sp|Q8BWW4|LARP4_MOUSE La-related protein 4 OS=Mus musculus OX=10090 GN=Larp4 PE=	6	5	5	5	5	5	5	4	3	3	5	5	5	4	3	3	5	5	5	4	3	3	9.1	9.1	9.1	79.601	718	718;719;719;610;660;107	0	30.338	By MS/MS	By MS/MS	By MS/MS	By matching	By matching	By matching	9.1	9.1	9.1	6	6.7	3.8
E9Q0P8;P04627	E9Q0P8;P04627	1;1	1;1	1;1	Serine/threonine-protein kinase A-Raf	Araf	tr|E9Q0P8|E9Q0P8_MOUSE Serine/threonine-protein kinase A-Raf OS=Mus musculus OX=10090 GN=Araf PE=1 SV=1;sp|P04627|ARAF_MOUSE Serine/threonine-protein kinase A-Raf OS=Mus musculus OX=10090 GN=Araf PE=1 SV=2	2	1	1	1	1	1	1	0	1	1	1	1	1	0	1	1	1	1	1	0	1	1	2.9	2.9	2.9	46.254	419	419;604	0.0083074	5.8841	By MS/MS	By MS/MS	By MS/MS		By matching	By matching	2.9	2.9	2.9	0	2.9	2.9
E9Q0U7;Q61699;D3Z027;D3Z3I9	E9Q0U7;Q61699	22;22;5;1	20;20;5;1	20;20;5;1	Heat shock protein 105 kDa	Hsph1	tr|E9Q0U7|E9Q0U7_MOUSE Heat shock protein 105 kDa OS=Mus musculus OX=10090 GN=Hsph1 PE=1 SV=1;sp|Q61699|HS105_MOUSE Heat shock protein 105 kDa OS=Mus musculus OX=10090 GN=Hsph1 PE=1 SV=2	4	22	20	20	19	22	20	12	18	20	17	20	18	11	16	18	17	20	18	11	16	18	21.9	19.8	19.8	91.677	817	817;858;100;144	0	247.74	By MS/MS	By MS/MS	By MS/MS	By MS/MS	By MS/MS	By MS/MS	19.3	21.9	21.8	12.7	20	20.1
E9Q179;Q8C5Q4	E9Q179;Q8C5Q4	1;1	1;1	1;1	G-rich sequence factor 1	Grsf1	tr|E9Q179|E9Q179_MOUSE G-rich sequence factor 1 OS=Mus musculus OX=10090 GN=Grsf1 PE=1 SV=1;sp|Q8C5Q4|GRSF1_MOUSE G-rich sequence factor 1 OS=Mus musculus OX=10090 GN=Grsf1 PE=1 SV=2	2	1	1	1	1	1	0	0	0	1	1	1	0	0	0	1	1	1	0	0	0	1	2.8	2.8	2.8	41.61	362	362;479	0	7.2209	By MS/MS	By matching				By matching	2.8	2.8	0	0	0	2.8
E9Q242;P54822;A0A0G2JFI8;E9Q0A0;E9Q3T7	E9Q242;P54822	3;3;1;1;1	3;3;1;1;1	3;3;1;1;1	Adenylosuccinate lyase	Adsl	tr|E9Q242|E9Q242_MOUSE Adenylosuccinate lyase OS=Mus musculus OX=10090 GN=Adsl PE=1 SV=1;sp|P54822|PUR8_MOUSE Adenylosuccinate lyase OS=Mus musculus OX=10090 GN=Adsl PE=1 SV=2	5	3	3	3	2	3	3	3	3	3	2	3	3	3	3	3	2	3	3	3	3	3	7.5	7.5	7.5	53.13	469	469;484;149;164;425	0	30.788	By MS/MS	By MS/MS	By MS/MS	By matching	By MS/MS	By MS/MS	5.1	7.5	7.5	7.5	7.5	7.5
E9Q2X6;Q8CG47;A0A0A6YXY3	E9Q2X6;Q8CG47	8;8;1	8;8;1	8;8;1	Structural maintenance of chromosomes protein;Structural maintenance of chromosomes protein 4	Smc4	tr|E9Q2X6|E9Q2X6_MOUSE Structural maintenance of chromosomes protein OS=Mus musculus OX=10090 GN=Smc4 PE=1 SV=1;sp|Q8CG47|SMC4_MOUSE Structural maintenance of chromosomes protein 4 OS=Mus musculus OX=10090 GN=Smc4 PE=1 SV=1	3	8	8	8	8	6	7	2	4	6	8	6	7	2	4	6	8	6	7	2	4	6	6.1	6.1	6.1	144.21	1261	1261;1286;109	0	49.092	By MS/MS	By MS/MS	By MS/MS	By matching	By matching	By matching	6.1	4.4	5.4	1.5	2.9	4.7
J3QMK6;E9Q3E1;Q80VQ0;F6QPV9	J3QMK6;E9Q3E1;Q80VQ0;F6QPV9	2;2;2;1	2;2;2;1	2;2;2;1	Aldehyde dehydrogenase;Aldehyde dehydrogenase family 3 member B1	1700055N04Rik;Aldh3b2;Aldh3b1	sp|J3QMK6|AL3B3_MOUSE Aldehyde dehydrogenase family 3 member B3 OS=Mus musculus OX=10090 GN=Aldh3b3 PE=1 SV=1;sp|E9Q3E1|AL3B2_MOUSE Aldehyde dehydrogenase family 3 member B2 OS=Mus musculus OX=10090 GN=Aldh3b2 PE=1 SV=1;sp|Q80VQ0|AL3B1_MOUSE Aldehyde dehyd	4	2	2	2	2	1	2	0	1	0	2	1	2	0	1	0	2	1	2	0	1	0	5.4	5.4	5.4	53.119	479	479;479;468;87	0	12.07	By MS/MS	By MS/MS	By MS/MS		By matching		5.4	2.9	5.4	0	2.5	0
E9Q3G8;A0A286YCP2	E9Q3G8;A0A286YCP2	3;2	3;2	3;2		Nup153	tr|E9Q3G8|E9Q3G8_MOUSE Nucleoporin 153 OS=Mus musculus OX=10090 GN=Nup153 PE=1 SV=1;tr|A0A286YCP2|A0A286YCP2_MOUSE Nucleoporin 153 (Fragment) OS=Mus musculus OX=10090 GN=Nup153 PE=1 SV=1	2	3	3	3	3	3	3	0	0	1	3	3	3	0	0	1	3	3	3	0	0	1	2.8	2.8	2.8	152.01	1462	1462;256	0	22.127	By MS/MS	By MS/MS	By MS/MS			By matching	2.8	2.8	2.8	0	0	1
E9Q3W4;Q9QXS1	E9Q3W4;Q9QXS1	12;12	12;12	12;12	Plectin	Plec	tr|E9Q3W4|E9Q3W4_MOUSE Plectin OS=Mus musculus OX=10090 GN=Plec PE=1 SV=1;sp|Q9QXS1|PLEC_MOUSE Plectin OS=Mus musculus OX=10090 GN=Plec PE=1 SV=3	2	12	12	12	11	9	11	3	5	7	11	9	11	3	5	7	11	9	11	3	5	7	2.9	2.9	2.9	499.1	4386	4386;4691	0	74.183	By MS/MS	By MS/MS	By MS/MS	By matching	By matching	By matching	2.7	2.1	2.7	0.7	1.1	1.6
E9Q3X0;Q9EQK5	E9Q3X0;Q9EQK5	4;4	4;4	4;4	Major vault protein	Mvp	tr|E9Q3X0|E9Q3X0_MOUSE Major vault protein OS=Mus musculus OX=10090 GN=Mvp PE=1 SV=1;sp|Q9EQK5|MVP_MOUSE Major vault protein OS=Mus musculus OX=10090 GN=Mvp PE=1 SV=4	2	4	4	4	4	3	4	4	4	4	4	3	4	4	4	4	4	3	4	4	4	4	4.8	4.8	4.8	96.856	870	870;861	0	31.47	By MS/MS	By MS/MS	By MS/MS	By matching	By MS/MS	By MS/MS	4.8	3.9	4.8	4.8	4.8	4.8
E9Q478;Q9CZH8	E9Q478;Q9CZH8	1;1	1;1	1;1	Coiled-coil domain-containing protein 77	Ccdc77	tr|E9Q478|E9Q478_MOUSE Coiled-coil domain-containing protein 77 (Fragment) OS=Mus musculus OX=10090 GN=Ccdc77 PE=1 SV=1;sp|Q9CZH8|CCD77_MOUSE Coiled-coil domain-containing protein 77 OS=Mus musculus OX=10090 GN=Ccdc77 PE=1 SV=1	2	1	1	1	1	1	1	0	0	1	1	1	1	0	0	1	1	1	1	0	0	1	5	5	5	23.85	200	200;489	0.0072917	5.8976	By matching	By matching	By MS/MS			By matching	5	5	5	0	0	5
E9Q4T0;E9QKG8;Q6PG16;D6RI36	E9Q4T0;E9QKG8;Q6PG16	4;4;4;1	4;4;4;1	4;4;4;1	Holliday junction recognition protein	Hjurp	tr|E9Q4T0|E9Q4T0_MOUSE Holliday junction recognition protein OS=Mus musculus OX=10090 GN=Hjurp PE=1 SV=1;tr|E9QKG8|E9QKG8_MOUSE Holliday junction recognition protein OS=Mus musculus OX=10090 GN=Hjurp PE=1 SV=1;sp|Q6PG16|HJURP_MOUSE Holliday junction recogn	4	4	4	4	3	4	4	0	0	1	3	4	4	0	0	1	3	4	4	0	0	1	8.1	8.1	8.1	65.714	591	591;667;667;89	0	43.512	By MS/MS	By MS/MS	By MS/MS			By matching	6.6	8.1	8.1	0	0	2.2
E9Q4Z2	E9Q4Z2	4	2	2	Acetyl-CoA carboxylase 2;Biotin carboxylase	Acacb	sp|E9Q4Z2|ACACB_MOUSE Acetyl-CoA carboxylase 2 OS=Mus musculus OX=10090 GN=Acacb PE=1 SV=1	1	4	2	2	4	4	2	2	2	2	2	2	1	1	1	0	2	2	1	1	1	0	3.1	1.6	1.6	275.75	2448	2448	0	11.927	By MS/MS	By matching	By matching	By matching	By matching	By matching	3.1	3.1	1.4	1.4	1.8	1.5
E9Q557;E9PZW0	E9Q557	8;3	8;3	8;3	Desmoplakin	Dsp	sp|E9Q557|DESP_MOUSE Desmoplakin OS=Mus musculus OX=10090 GN=Dsp PE=1 SV=1	2	8	8	8	4	3	2	3	8	5	4	3	2	3	8	5	4	3	2	3	8	5	2.6	2.6	2.6	332.91	2883	2883;2284	0	48.142	By matching	By matching	By matching	By matching	By MS/MS	By matching	1.2	0.9	0.6	0.9	2.6	1.6
E9Q561;Q8BTU6;P10630	E9Q561;Q8BTU6;P10630	1;1;1	1;1;1	1;1;1	Eukaryotic initiation factor 4A-II;Eukaryotic initiation factor 4A-II, N-terminally processed	Eif4a2	tr|E9Q561|E9Q561_MOUSE Eukaryotic initiation factor 4A-II OS=Mus musculus OX=10090 GN=Eif4a2 PE=1 SV=1;tr|Q8BTU6|Q8BTU6_MOUSE Eukaryotic initiation factor 4A-II OS=Mus musculus OX=10090 GN=Eif4a2 PE=1 SV=1;sp|P10630|IF4A2_MOUSE Eukaryotic initiation factor	3	1	1	1	1	1	1	0	0	1	1	1	1	0	0	1	1	1	1	0	0	1	7.4	7.4	7.4	36.166	312	312;362;407	0	6.6852	By MS/MS	By MS/MS	By matching			By matching	7.4	7.4	7.4	0	0	7.4
E9Q9M6;E9Q5B5;O08528	E9Q9M6;E9Q5B5;O08528	1;1;1	1;1;1	1;1;1	Hexokinase;Hexokinase-2	Hk2	tr|E9Q9M6|E9Q9M6_MOUSE Phosphotransferase (Fragment) OS=Mus musculus OX=10090 GN=Hk2 PE=1 SV=1;tr|E9Q5B5|E9Q5B5_MOUSE Hexokinase-2 OS=Mus musculus OX=10090 GN=Hk2 PE=1 SV=1;sp|O08528|HXK2_MOUSE Hexokinase-2 OS=Mus musculus OX=10090 GN=Hk2 PE=1 SV=1	3	1	1	1	1	1	1	0	0	1	1	1	1	0	0	1	1	1	1	0	0	1	30.2	30.2	30.2	4.9067	43	43;889;917	0	10.044	By matching	By MS/MS	By MS/MS			By matching	30.2	30.2	30.2	0	0	30.2
E9Q5B6;F6SHF3;F6ZV59;G5E8G0;G3X9W0;Q60668	E9Q5B6;F6SHF3;F6ZV59;G5E8G0;G3X9W0;Q60668	1;1;1;1;1;1	1;1;1;1;1;1	1;1;1;1;1;1	Heterogeneous nuclear ribonucleoprotein D0	Hnrnpd	tr|E9Q5B6|E9Q5B6_MOUSE Heterogeneous nuclear ribonucleoprotein D0 (Fragment) OS=Mus musculus OX=10090 GN=Hnrnpd PE=1 SV=1;tr|F6SHF3|F6SHF3_MOUSE Heterogeneous nuclear ribonucleoprotein D0 (Fragment) OS=Mus musculus OX=10090 GN=Hnrnpd PE=1 SV=1;tr|F6ZV59|F6	6	1	1	1	1	1	1	1	1	1	1	1	1	1	1	1	1	1	1	1	1	1	13.1	13.1	13.1	12.139	107	107;150;216;287;336;355	0	18.603	By MS/MS	By MS/MS	By MS/MS	By matching	By MS/MS	By MS/MS	13.1	13.1	13.1	13.1	13.1	13.1
E9Q5X5;Q07797	E9Q5X5;Q07797	1;1	1;1	1;1	Galectin-3-binding protein	Lgals3bp	tr|E9Q5X5|E9Q5X5_MOUSE Galectin-3-binding protein (Fragment) OS=Mus musculus OX=10090 GN=Lgals3bp PE=1 SV=1;sp|Q07797|LG3BP_MOUSE Galectin-3-binding protein OS=Mus musculus OX=10090 GN=Lgals3bp PE=1 SV=1	2	1	1	1	1	1	1	1	1	1	1	1	1	1	1	1	1	1	1	1	1	1	5.4	5.4	5.4	21.94	204	204;577	0	12.458	By MS/MS	By MS/MS	By matching	By MS/MS	By MS/MS	By matching	5.4	5.4	5.4	5.4	5.4	5.4
E9Q616	E9Q616	2	2	2		Ahnak	tr|E9Q616|E9Q616_MOUSE AHNAK nucleoprotein (desmoyokin) OS=Mus musculus OX=10090 GN=Ahnak PE=1 SV=1	1	2	2	2	0	0	1	0	0	1	0	0	1	0	0	1	0	0	1	0	0	1	0.5	0.5	0.5	604.25	5656	5656	0	12.503			By MS/MS			By MS/MS	0	0	0.3	0	0	0.2
E9Q6R7;A0A1W2P7C0;Q61636;A0A1W2P8G5;A0A1W2P8A5	E9Q6R7	7;3;3;1;1	7;3;3;1;1	7;3;3;1;1		Utrn	tr|E9Q6R7|E9Q6R7_MOUSE Utrophin OS=Mus musculus OX=10090 GN=Utrn PE=1 SV=1	5	7	7	7	5	6	7	0	0	1	5	6	7	0	0	1	5	6	7	0	0	1	2.2	2.2	2.2	392.7	3430	3430;956;987;730;732	0	56.873	By MS/MS	By MS/MS	By MS/MS			By matching	1.5	1.8	2.2	0	0	0.2
E9Q718;Q9R0B9	E9Q718;Q9R0B9	2;2	2;2	2;2	Procollagen-lysine,2-oxoglutarate 5-dioxygenase 2	Plod2	tr|E9Q718|E9Q718_MOUSE Procollagen-lysine,2-oxoglutarate 5-dioxygenase 2 OS=Mus musculus OX=10090 GN=Plod2 PE=1 SV=1;sp|Q9R0B9|PLOD2_MOUSE Procollagen-lysine,2-oxoglutarate 5-dioxygenase 2 OS=Mus musculus OX=10090 GN=Plod2 PE=1 SV=2	2	2	2	2	1	1	1	0	0	0	1	1	1	0	0	0	1	1	1	0	0	0	3.4	3.4	3.4	86.9	758	758;737	0	12.65	By MS/MS	By matching	By MS/MS				1.8	1.6	1.6	0	0	0
E9Q740;F8VQC1	E9Q740;F8VQC1	1;1	1;1	1;1	Signal recognition particle subunit SRP72	Srp72	tr|E9Q740|E9Q740_MOUSE Signal recognition particle subunit SRP72 OS=Mus musculus OX=10090 GN=Srp72 PE=1 SV=1;tr|F8VQC1|F8VQC1_MOUSE Signal recognition particle subunit SRP72 OS=Mus musculus OX=10090 GN=Srp72 PE=1 SV=1	2	1	1	1	1	1	1	1	1	1	1	1	1	1	1	1	1	1	1	1	1	1	2.8	2.8	2.8	67.928	610	610;671	0.0053821	5.9698	By MS/MS	By MS/MS	By MS/MS	By matching	By matching	By matching	2.8	2.8	2.8	2.8	2.8	2.8
F6UFB9;E9Q798;P61750	F6UFB9;E9Q798;P61750	1;1;1	1;1;1	1;1;1	ADP-ribosylation factor 4	Arf4	tr|F6UFB9|F6UFB9_MOUSE ADP-ribosylation factor 4 (Fragment) OS=Mus musculus OX=10090 GN=Arf4 PE=1 SV=1;tr|E9Q798|E9Q798_MOUSE ADP-ribosylation factor 4 OS=Mus musculus OX=10090 GN=Arf4 PE=1 SV=1;sp|P61750|ARF4_MOUSE ADP-ribosylation factor 4 OS=Mus musculu	3	1	1	1	1	1	1	0	1	0	1	1	1	0	1	0	1	1	1	0	1	0	16.7	16.7	16.7	6.7196	60	60;153;180	0	16.105	By MS/MS	By MS/MS	By MS/MS		By matching		16.7	16.7	16.7	0	16.7	0
E9Q7A5;E9Q8R5;Q99JY4	E9Q7A5;E9Q8R5;Q99JY4	1;1;1	1;1;1	1;1;1	TraB domain-containing protein	Trabd	tr|E9Q7A5|E9Q7A5_MOUSE TraB domain-containing protein (Fragment) OS=Mus musculus OX=10090 GN=Trabd PE=1 SV=8;tr|E9Q8R5|E9Q8R5_MOUSE TraB domain-containing protein OS=Mus musculus OX=10090 GN=Trabd PE=1 SV=1;sp|Q99JY4|TRABD_MOUSE TraB domain-containing prot	3	1	1	1	1	1	1	0	0	0	1	1	1	0	0	0	1	1	1	0	0	0	5.1	5.1	5.1	26.323	234	234;320;376	0	9.986	By MS/MS	By MS/MS	By MS/MS				5.1	5.1	5.1	0	0	0
E9Q7B0;Q60715	E9Q7B0;Q60715	2;2	2;2	2;2	Prolyl 4-hydroxylase subunit alpha-1	P4ha1	tr|E9Q7B0|E9Q7B0_MOUSE Prolyl 4-hydroxylase subunit alpha-1 OS=Mus musculus OX=10090 GN=P4ha1 PE=1 SV=1;sp|Q60715|P4HA1_MOUSE Prolyl 4-hydroxylase subunit alpha-1 OS=Mus musculus OX=10090 GN=P4ha1 PE=1 SV=2	2	2	2	2	2	2	2	0	0	0	2	2	2	0	0	0	2	2	2	0	0	0	5.3	5.3	5.3	51.753	454	454;534	0	13.695	By matching	By MS/MS	By MS/MS				5.3	5.3	5.3	0	0	0
E9Q7E2	E9Q7E2	2	2	2		Arid2	sp|E9Q7E2|ARID2_MOUSE AT-rich interactive domain-containing protein 2 OS=Mus musculus OX=10090 GN=Arid2 PE=1 SV=1	1	2	2	2	2	2	2	2	2	2	2	2	2	2	2	2	2	2	2	2	2	2	1.1	1.1	1.1	195.99	1828	1828	0	13.565	By matching	By matching	By MS/MS	By matching	By matching	By matching	1.1	1.1	1.1	1.1	1.1	1.1
E9Q7G0;A0A1B0GT61;A0A1B0GSW3	E9Q7G0;A0A1B0GT61;A0A1B0GSW3	3;2;2	3;2;2	3;2;2		Numa1	sp|E9Q7G0|NUMA1_MOUSE Nuclear mitotic apparatus protein 1 OS=Mus musculus OX=10090 GN=Numa1 PE=1 SV=1;tr|A0A1B0GT61|A0A1B0GT61_MOUSE Nuclear mitotic apparatus protein 1 (Fragment) OS=Mus musculus OX=10090 GN=Numa1 PE=1 SV=1;tr|A0A1B0GSW3|A0A1B0GSW3_MOUSE N	3	3	3	3	2	2	3	1	1	2	2	2	3	1	1	2	2	2	3	1	1	2	1.6	1.6	1.6	235.63	2094	2094;875;1082	0	25.939	By MS/MS	By MS/MS	By MS/MS	By matching	By MS/MS	By MS/MS	1.1	1.1	1.6	0.5	0.6	1.1
Q80WU2;E9Q7Q7;Q61085	Q80WU2;E9Q7Q7;Q61085	1;1;1	1;1;1	1;1;1	Rhophilin-1	Rhpn1	tr|Q80WU2|Q80WU2_MOUSE Rhophilin-1 OS=Mus musculus OX=10090 GN=Rhpn1 PE=1 SV=1;tr|E9Q7Q7|E9Q7Q7_MOUSE Rhophilin-1 OS=Mus musculus OX=10090 GN=Rhpn1 PE=1 SV=1;sp|Q61085|RHPN1_MOUSE Rhophilin-1 OS=Mus musculus OX=10090 GN=Rhpn1 PE=1 SV=2	3	1	1	1	0	1	0	0	0	0	0	1	0	0	0	0	0	1	0	0	0	0	2.2	2.2	2.2	49.071	451	451;661;643	0	6.3942		By MS/MS					0	2.2	0	0	0	0
E9Q8A5;Q8K119	E9Q8A5;Q8K119	1;1	1;1	1;1		Pms1	tr|E9Q8A5|E9Q8A5_MOUSE PMS1 homolog 1, mismatch repair system component (Fragment) OS=Mus musculus OX=10090 GN=Pms1 PE=1 SV=1;tr|Q8K119|Q8K119_MOUSE PMS1 homolog 1, mismatch repair system component OS=Mus musculus OX=10090 GN=Pms1 PE=1 SV=1	2	1	1	1	1	1	1	0	0	0	1	1	1	0	0	0	1	1	1	0	0	0	1.6	1.6	1.6	74.863	669	669;917	0.0074074	5.9186	By matching	By matching	By MS/MS				1.6	1.6	1.6	0	0	0
E9Q8D0	E9Q8D0	1	1	1		Dnajc21	sp|E9Q8D0|DJC21_MOUSE DnaJ homolog subfamily C member 21 OS=Mus musculus OX=10090 GN=Dnajc21 PE=1 SV=1	1	1	1	1	1	1	1	1	1	1	1	1	1	1	1	1	1	1	1	1	1	1	2.4	2.4	2.4	61.734	531	531	0	9.7567	By matching	By MS/MS	By MS/MS	By matching	By matching	By MS/MS	2.4	2.4	2.4	2.4	2.4	2.4
F7AA45;E9Q8F0;Q8VH51	F7AA45;E9Q8F0;Q8VH51	1;1;1	1;1;1	1;1;1	RNA-binding protein 39	Rbm39	tr|F7AA45|F7AA45_MOUSE RNA-binding protein 39 (Fragment) OS=Mus musculus OX=10090 GN=Rbm39 PE=1 SV=1;tr|E9Q8F0|E9Q8F0_MOUSE RNA-binding protein 39 OS=Mus musculus OX=10090 GN=Rbm39 PE=1 SV=1;sp|Q8VH51|RBM39_MOUSE RNA-binding protein 39 OS=Mus musculus OX=1	3	1	1	1	1	1	0	0	1	1	1	1	0	0	1	1	1	1	0	0	1	1	3.2	3.2	3.2	33.828	311	311;415;530	0	6.61	By matching	By matching			By MS/MS	By MS/MS	3.2	3.2	0	0	3.2	3.2
E9Q9E0;Q8VCX5	E9Q9E0;Q8VCX5	1;1	1;1	1;1	Calcium uptake protein 1, mitochondrial	Micu1	tr|E9Q9E0|E9Q9E0_MOUSE Calcium uptake protein 1, mitochondrial (Fragment) OS=Mus musculus OX=10090 GN=Micu1 PE=1 SV=1;sp|Q8VCX5|MICU1_MOUSE Calcium uptake protein 1, mitochondrial OS=Mus musculus OX=10090 GN=Micu1 PE=1 SV=1	2	1	1	1	1	1	1	0	0	0	1	1	1	0	0	0	1	1	1	0	0	0	5.6	5.6	5.6	26.718	234	234;477	0	11.414	By MS/MS	By MS/MS	By MS/MS				5.6	5.6	5.6	0	0	0
E9QA45;Q3UJK4	E9QA45;Q3UJK4	1;1	1;1	1;1	GTP-binding protein 2	Gtpbp2	tr|E9QA45|E9QA45_MOUSE GTP-binding protein 2 OS=Mus musculus OX=10090 GN=Gtpbp2 PE=1 SV=1;sp|Q3UJK4|GTPB2_MOUSE GTP-binding protein 2 OS=Mus musculus OX=10090 GN=Gtpbp2 PE=1 SV=1	2	1	1	1	1	1	1	0	0	0	1	1	1	0	0	0	1	1	1	0	0	0	1.7	1.7	1.7	65.8	604	604;602	0.0044101	6.0184	By MS/MS	By matching	By MS/MS				1.7	1.7	1.7	0	0	0
E9QAS4;E9QAS5;Q6PDQ2	E9QAS4;E9QAS5;Q6PDQ2	1;1;1	1;1;1	1;1;1	Chromodomain-helicase-DNA-binding protein 4	Chd4	tr|E9QAS4|E9QAS4_MOUSE Chromodomain-helicase-DNA-binding protein 4 OS=Mus musculus OX=10090 GN=Chd4 PE=1 SV=1;tr|E9QAS5|E9QAS5_MOUSE Chromodomain-helicase-DNA-binding protein 4 OS=Mus musculus OX=10090 GN=Chd4 PE=1 SV=1;sp|Q6PDQ2|CHD4_MOUSE Chromodomain-he	3	1	1	1	1	1	1	1	0	0	1	1	1	1	0	0	1	1	1	1	0	0	0.6	0.6	0.6	216.37	1902	1902;1922;1915	0	8.3475	By matching	By matching	By MS/MS	By matching			0.6	0.6	0.6	0.6	0	0
F6W0G8;E9QB02;Q68FL6	F6W0G8;E9QB02;Q68FL6	3;3;3	3;3;3	3;3;3	Methionine--tRNA ligase, cytoplasmic	Mars	tr|F6W0G8|F6W0G8_MOUSE Methionine--tRNA ligase, cytoplasmic (Fragment) OS=Mus musculus OX=10090 GN=Mars PE=1 SV=2;tr|E9QB02|E9QB02_MOUSE Methionine--tRNA ligase, cytoplasmic OS=Mus musculus OX=10090 GN=Mars PE=1 SV=1;sp|Q68FL6|SYMC_MOUSE Methionine--tRNA l	3	3	3	3	2	2	3	1	2	1	2	2	3	1	2	1	2	2	3	1	2	1	12	12	12	19.693	184	184;910;902	0	28.032	By MS/MS	By MS/MS	By MS/MS	By matching	By matching	By matching	12	12	12	6.5	12	5.4
E9QN31;Q922K7;A0A0N4SW16	E9QN31;Q922K7;A0A0N4SW16	4;4;2	4;4;2	4;4;2	Probable 28S rRNA (cytosine-C(5))-methyltransferase	Nop2	tr|E9QN31|E9QN31_MOUSE Probable 28S rRNA (cytosine-C(5))-methyltransferase OS=Mus musculus OX=10090 GN=Nop2 PE=1 SV=1;sp|Q922K7|NOP2_MOUSE Probable 28S rRNA (cytosine-C(5))-methyltransferase OS=Mus musculus OX=10090 GN=Nop2 PE=1 SV=1;tr|A0A0N4SW16|A0A0N4SW	3	4	4	4	4	4	3	2	4	4	4	4	3	2	4	4	4	4	3	2	4	4	5.4	5.4	5.4	86.906	794	794;793;133	0	38.773	By MS/MS	By MS/MS	By MS/MS	By matching	By MS/MS	By MS/MS	5.4	5.4	4.3	2.5	5.4	5.4
E9QNT5;Q8VE65	E9QNT5;Q8VE65	1;1	1;1	1;1	Transcription initiation factor TFIID subunit 12	Taf12	tr|E9QNT5|E9QNT5_MOUSE Transcription initiation factor TFIID subunit 12 OS=Mus musculus OX=10090 GN=Taf12 PE=1 SV=1;sp|Q8VE65|TAF12_MOUSE Transcription initiation factor TFIID subunit 12 OS=Mus musculus OX=10090 GN=Taf12 PE=1 SV=1	2	1	1	1	0	1	1	1	1	1	0	1	1	1	1	1	0	1	1	1	1	1	5.2	5.2	5.2	23.525	213	213;161	0.0034091	6.103		By matching	By MS/MS	By matching	By matching	By matching	0	5.2	5.2	5.2	5.2	5.2
G5E8R3;E9QPD7;Q05920;A0A286YCC5	G5E8R3;E9QPD7;Q05920	16;16;16;2	16;16;16;2	16;16;16;2	Pyruvate carboxylase;Pyruvate carboxylase, mitochondrial	Pcx;Pc	tr|G5E8R3|G5E8R3_MOUSE Pyruvate carboxylase OS=Mus musculus OX=10090 GN=Pcx PE=1 SV=1;tr|E9QPD7|E9QPD7_MOUSE Pyruvate carboxylase OS=Mus musculus OX=10090 GN=Pcx PE=1 SV=1;sp|Q05920|PYC_MOUSE Pyruvate carboxylase, mitochondrial OS=Mus musculus OX=10090 GN=	4	16	16	16	16	13	14	15	14	13	16	13	14	15	14	13	16	13	14	15	14	13	19.9	19.9	19.9	129.7	1178	1178;1179;1178;116	0	198.38	By MS/MS	By MS/MS	By MS/MS	By MS/MS	By MS/MS	By MS/MS	19.9	16.7	17.8	18.9	18	17.1
E9QPI5;Q6A026	E9QPI5;Q6A026	1;1	1;1	1;1	Sister chromatid cohesion protein PDS5 homolog A	Pds5a	tr|E9QPI5|E9QPI5_MOUSE Sister chromatid cohesion protein PDS5 homolog A OS=Mus musculus OX=10090 GN=Pds5a PE=1 SV=1;sp|Q6A026|PDS5A_MOUSE Sister chromatid cohesion protein PDS5 homolog A OS=Mus musculus OX=10090 GN=Pds5a PE=1 SV=3	2	1	1	1	1	1	1	1	1	1	1	1	1	1	1	1	1	1	1	1	1	1	0.5	0.5	0.5	150.22	1332	1332;1332	0	6.3925	By MS/MS	By matching	By MS/MS	By matching	By MS/MS	By matching	0.5	0.5	0.5	0.5	0.5	0.5
E9QQ10;Q70FJ1	E9QQ10;Q70FJ1	2;2	2;2	2;2	A-kinase anchor protein 9	Akap9	tr|E9QQ10|E9QQ10_MOUSE A-kinase anchor protein 9 OS=Mus musculus OX=10090 GN=Akap9 PE=1 SV=1;sp|Q70FJ1|AKAP9_MOUSE A-kinase anchor protein 9 OS=Mus musculus OX=10090 GN=Akap9 PE=1 SV=2	2	2	2	2	1	2	1	0	1	1	1	2	1	0	1	1	1	2	1	0	1	1	0.6	0.6	0.6	434.13	3779	3779;3797	0	11.062	By matching	By matching	By MS/MS		By MS/MS	By MS/MS	0.3	0.6	0.3	0	0.3	0.3
F2Z471;Q60932	F2Z471;Q60932	1;1	1;1	1;1	Voltage-dependent anion-selective channel protein 1	Vdac1	tr|F2Z471|F2Z471_MOUSE Voltage-dependent anion-selective channel protein 1 OS=Mus musculus OX=10090 GN=Vdac1 PE=1 SV=1;sp|Q60932|VDAC1_MOUSE Voltage-dependent anion-selective channel protein 1 OS=Mus musculus OX=10090 GN=Vdac1 PE=1 SV=3	2	1	1	1	1	1	1	0	1	0	1	1	1	0	1	0	1	1	1	0	1	0	4.3	4.3	4.3	28.157	254	254;296	0	8.0239	By matching	By matching	By MS/MS		By matching		4.3	4.3	4.3	0	4.3	0
F6ZQL0;F6QHD1;Q80WJ7;E9PUX0;F6QFT1;F6ZSG0	F6ZQL0;F6QHD1;Q80WJ7;E9PUX0;F6QFT1	3;3;3;2;2;1	3;3;3;2;2;1	3;3;3;2;2;1	Protein LYRIC	Mtdh	tr|F6ZQL0|F6ZQL0_MOUSE Protein LYRIC (Fragment) OS=Mus musculus OX=10090 GN=Mtdh PE=1 SV=1;tr|F6QHD1|F6QHD1_MOUSE Protein LYRIC (Fragment) OS=Mus musculus OX=10090 GN=Mtdh PE=1 SV=2;sp|Q80WJ7|LYRIC_MOUSE Protein LYRIC OS=Mus musculus OX=10090 GN=Mtdh PE=1	6	3	3	3	3	3	3	1	1	3	3	3	3	1	1	3	3	3	3	1	1	3	12.3	12.3	12.3	24.262	220	220;393;579;164;382;356	0	28.64	By MS/MS	By MS/MS	By MS/MS	By matching	By matching	By MS/MS	12.3	12.3	12.3	5.9	5.9	12.3
F6QL70;Q5M8M8;P47915;W4VSN7;A0A1L1SS27;A0A1L1SUN1;A0A1L1STJ3	F6QL70;Q5M8M8;P47915;W4VSN7;A0A1L1SS27	5;5;5;4;3;2;1	5;5;5;4;3;2;1	5;5;5;4;3;2;1	60S ribosomal protein L29	Gm17669;Rpl29;Gm3550	tr|F6QL70|F6QL70_MOUSE 60S ribosomal protein L29 OS=Mus musculus OX=10090 GN=Gm17669 PE=3 SV=1;tr|Q5M8M8|Q5M8M8_MOUSE 60S ribosomal protein L29 OS=Mus musculus OX=10090 GN=Rpl29 PE=1 SV=1;sp|P47915|RL29_MOUSE 60S ribosomal protein L29 OS=Mus musculus OX=10	7	5	5	5	5	5	4	4	4	5	5	5	4	4	4	5	5	5	4	4	4	5	31.8	31.8	31.8	16.966	154	154;160;160;160;140;94;68	0	40.946	By MS/MS	By MS/MS	By MS/MS	By MS/MS	By MS/MS	By MS/MS	31.8	31.8	24.7	26	26	31.8
F6S1R2;Q8N9S3;A2AF81	F6S1R2;Q8N9S3;A2AF81	2;2;1	2;2;1	2;2;1	Activator of 90 kDa heat shock protein ATPase homolog 2	Ahsa2	tr|F6S1R2|F6S1R2_MOUSE Activator of 90 kDa heat shock protein ATPase homolog 2 (Fragment) OS=Mus musculus OX=10090 GN=Ahsa2 PE=1 SV=1;sp|Q8N9S3|AHSA2_MOUSE Activator of 90 kDa heat shock protein ATPase homolog 2 OS=Mus musculus OX=10090 GN=Ahsa2 PE=1 SV=2;	3	2	2	2	2	1	2	1	1	2	2	1	2	1	1	2	2	1	2	1	1	2	6.3	6.3	6.3	35.523	317	317;331;200	0	13.561	By MS/MS	By MS/MS	By MS/MS	By matching	By matching	By matching	6.3	3.5	6.3	3.5	3.5	6.3
F6SLP4;Q9DC16	F6SLP4;Q9DC16	1;1	1;1	1;1	Endoplasmic reticulum-Golgi intermediate compartment protein 1	Ergic1	tr|F6SLP4|F6SLP4_MOUSE Endoplasmic reticulum-Golgi intermediate compartment protein 1 (Fragment) OS=Mus musculus OX=10090 GN=Ergic1 PE=1 SV=1;sp|Q9DC16|ERGI1_MOUSE Endoplasmic reticulum-Golgi intermediate compartment protein 1 OS=Mus musculus OX=10090 GN=E	2	1	1	1	1	1	1	1	0	1	1	1	1	1	0	1	1	1	1	1	0	1	8.8	8.8	8.8	11.774	102	102;290	0.0022857	6.1217	By MS/MS	By matching	By MS/MS	By matching		By matching	8.8	8.8	8.8	8.8	0	8.8
F6SVV1;P62082	F6SVV1;P62082	3;3	3;3	3;3	40S ribosomal protein S7	Gm9493;Rps7	tr|F6SVV1|F6SVV1_MOUSE 40S ribosomal protein S7 OS=Mus musculus OX=10090 GN=Gm9493 PE=3 SV=1;sp|P62082|RS7_MOUSE 40S ribosomal protein S7 OS=Mus musculus OX=10090 GN=Rps7 PE=2 SV=1	2	3	3	3	3	2	3	2	3	3	3	2	3	2	3	3	3	2	3	2	3	3	13.5	13.5	13.5	21.882	192	192;194	0	17.433	By MS/MS	By MS/MS	By MS/MS	By matching	By MS/MS	By matching	13.5	9.4	13.5	9.4	13.5	13.5
F6YY69;F6VW30;P68254	F6YY69;F6VW30;P68254	3;3;3	1;1;1	1;1;1	14-3-3 protein theta	Ywhaq	tr|F6YY69|F6YY69_MOUSE 14-3-3 protein theta (Fragment) OS=Mus musculus OX=10090 GN=Ywhaq PE=1 SV=1;tr|F6VW30|F6VW30_MOUSE 14-3-3 protein theta (Fragment) OS=Mus musculus OX=10090 GN=Ywhaq PE=1 SV=1;sp|P68254|1433T_MOUSE 14-3-3 protein theta OS=Mus musculus	3	3	1	1	3	3	3	3	3	3	1	1	1	1	1	1	1	1	1	1	1	1	10.2	4.9	4.9	32.221	285	285;303;245	0	18.352	By MS/MS	By MS/MS	By MS/MS	By matching	By MS/MS	By matching	10.2	10.2	10.2	10.2	10.2	10.2
F6WNR1;Q9R0E2	F6WNR1;Q9R0E2	1;1	1;1	1;1	Procollagen-lysine,2-oxoglutarate 5-dioxygenase 1	Plod1	tr|F6WNR1|F6WNR1_MOUSE Procollagen-lysine,2-oxoglutarate 5-dioxygenase 1 (Fragment) OS=Mus musculus OX=10090 GN=Plod1 PE=1 SV=1;sp|Q9R0E2|PLOD1_MOUSE Procollagen-lysine,2-oxoglutarate 5-dioxygenase 1 OS=Mus musculus OX=10090 GN=Plod1 PE=1 SV=1	2	1	1	1	1	1	1	0	1	1	1	1	1	0	1	1	1	1	1	0	1	1	4.1	4.1	4.1	31.085	269	269;728	0	6.5692	By matching	By matching	By MS/MS		By matching	By matching	4.1	4.1	4.1	0	4.1	4.1
F6XVM5;Q9DB20	F6XVM5;Q9DB20	1;1	1;1	1;1	ATP synthase subunit O, mitochondrial	Atp5o	tr|F6XVM5|F6XVM5_MOUSE ATP synthase subunit O, mitochondrial (Fragment) OS=Mus musculus OX=10090 GN=Atp5o PE=1 SV=1;sp|Q9DB20|ATPO_MOUSE ATP synthase subunit O, mitochondrial OS=Mus musculus OX=10090 GN=Atp5o PE=1 SV=1	2	1	1	1	1	1	1	0	0	1	1	1	1	0	0	1	1	1	1	0	0	1	15.5	15.5	15.5	7.8391	71	71;213	0	6.4279	By MS/MS	By MS/MS	By MS/MS			By matching	15.5	15.5	15.5	0	0	15.5
G5E8J8;F6ZBR8;O88286	G5E8J8;F6ZBR8;O88286	3;3;3	3;3;3	3;3;3	Protein Wiz	Wiz	tr|G5E8J8|G5E8J8_MOUSE MCG14253, isoform CRA_a OS=Mus musculus OX=10090 GN=Wiz PE=1 SV=1;tr|F6ZBR8|F6ZBR8_MOUSE Protein Wiz (Fragment) OS=Mus musculus OX=10090 GN=Wiz PE=1 SV=1;sp|O88286|WIZ_MOUSE Protein Wiz OS=Mus musculus OX=10090 GN=Wiz PE=1 SV=2	3	3	3	3	3	3	3	1	1	1	3	3	3	1	1	1	3	3	3	1	1	1	4.3	4.3	4.3	102.93	955	955;973;1684	0	20.829	By MS/MS	By MS/MS	By MS/MS	By matching	By matching	By matching	4.3	4.3	4.3	1.2	1.2	1.2
Q7M739;F6ZDS4	Q7M739;F6ZDS4	4;4	4;4	4;4	Nucleoprotein TPR	Tpr	tr|Q7M739|Q7M739_MOUSE Nuclear pore complex-associated intranuclear coiled-coil protein TPR OS=Mus musculus OX=10090 GN=Tpr PE=1 SV=1;sp|F6ZDS4|TPR_MOUSE Nucleoprotein TPR OS=Mus musculus OX=10090 GN=Tpr PE=1 SV=1	2	4	4	4	3	4	4	0	2	3	3	4	4	0	2	3	3	4	4	0	2	3	1.8	1.8	1.8	266.92	2357	2357;2431	0	26.063	By MS/MS	By MS/MS	By MS/MS		By matching	By matching	1.3	1.8	1.8	0	0.8	1.4
F6ZKZ3;Q9R112	F6ZKZ3;Q9R112	1;1	1;1	1;1	Sulfide:quinone oxidoreductase, mitochondrial	Sqrdl	tr|F6ZKZ3|F6ZKZ3_MOUSE Sulfide:quinone oxidoreductase, mitochondrial OS=Mus musculus OX=10090 GN=Sqor PE=1 SV=1;sp|Q9R112|SQOR_MOUSE Sulfide:quinone oxidoreductase, mitochondrial OS=Mus musculus OX=10090 GN=Sqor PE=1 SV=3	2	1	1	1	1	1	1	0	0	0	1	1	1	0	0	0	1	1	1	0	0	0	4.7	4.7	4.7	33.169	300	300;450	0	7.0039	By MS/MS	By matching	By MS/MS				4.7	4.7	4.7	0	0	0
F8VPU2;E9Q805	F8VPU2;E9Q805	3;2	3;2	3;2	FERM, RhoGEF and pleckstrin domain-containing protein 1	Farp1	sp|F8VPU2|FARP1_MOUSE FERM, ARHGEF and pleckstrin domain-containing protein 1 OS=Mus musculus OX=10090 GN=Farp1 PE=1 SV=1;tr|E9Q805|E9Q805_MOUSE FERM, ARHGEF and pleckstrin domain-containing protein 1 (Fragment) OS=Mus musculus OX=10090 GN=Farp1 PE=1 SV=1	2	3	3	3	3	3	3	0	1	1	3	3	3	0	1	1	3	3	3	0	1	1	3.9	3.9	3.9	118.87	1048	1048;211	0	19.073	By MS/MS	By MS/MS	By MS/MS		By matching	By matching	3.9	3.9	3.9	0	1.1	1.1
F8WGL3;P18760;P45591	F8WGL3;P18760;P45591	2;2;1	2;2;1	2;2;1	Cofilin-1;Cofilin-2	Cfl1;Cfl2	tr|F8WGL3|F8WGL3_MOUSE Cofilin-1 OS=Mus musculus OX=10090 GN=Cfl1 PE=1 SV=1;sp|P18760|COF1_MOUSE Cofilin-1 OS=Mus musculus OX=10090 GN=Cfl1 PE=1 SV=3;sp|P45591|COF2_MOUSE Cofilin-2 OS=Mus musculus OX=10090 GN=Cfl2 PE=1 SV=1	3	2	2	2	2	2	2	2	2	2	2	2	2	2	2	2	2	2	2	2	2	2	10.1	10.1	10.1	24.576	227	227;166;166	0	18.507	By MS/MS	By MS/MS	By MS/MS	By matching	By MS/MS	By MS/MS	10.1	10.1	10.1	10.1	10.1	10.1
F8WHL1;Q5IRJ6	F8WHL1;Q5IRJ6	1;1	1;1	1;1	Zinc transporter 9	Slc30a9	tr|F8WHL1|F8WHL1_MOUSE Zinc transporter 9 OS=Mus musculus OX=10090 GN=Slc30a9 PE=1 SV=1;sp|Q5IRJ6|ZNT9_MOUSE Zinc transporter 9 OS=Mus musculus OX=10090 GN=Slc30a9 PE=1 SV=2	2	1	1	1	0	1	1	0	0	0	0	1	1	0	0	0	0	1	1	0	0	0	2.2	2.2	2.2	60.674	547	547;567	0	7.444		By MS/MS	By matching				0	2.2	2.2	0	0	0
F8WHL2;Q8CIE6	F8WHL2;Q8CIE6	2;2	2;2	2;2	Coatomer subunit alpha;Coatomer subunit alpha;Xenin;Proxenin	Copa	tr|F8WHL2|F8WHL2_MOUSE Coatomer subunit alpha OS=Mus musculus OX=10090 GN=Copa PE=1 SV=1;sp|Q8CIE6|COPA_MOUSE Coatomer subunit alpha OS=Mus musculus OX=10090 GN=Copa PE=1 SV=2	2	2	2	2	2	1	2	0	1	1	2	1	2	0	1	1	2	1	2	0	1	1	1.8	1.8	1.8	139.41	1233	1233;1224	0	11.157	By MS/MS	By matching	By MS/MS		By matching	By matching	1.8	0.8	1.8	0	0.8	0.8
F8WJG3;P62996	F8WJG3;P62996	1;1	1;1	1;1	Transformer-2 protein homolog beta	Tra2b	tr|F8WJG3|F8WJG3_MOUSE Transformer-2 protein homolog beta OS=Mus musculus OX=10090 GN=Tra2b PE=1 SV=1;sp|P62996|TRA2B_MOUSE Transformer-2 protein homolog beta OS=Mus musculus OX=10090 GN=Tra2b PE=1 SV=1	2	1	1	1	1	1	1	1	1	1	1	1	1	1	1	1	1	1	1	1	1	1	5.3	5.3	5.3	21.935	188	188;288	0	8.7665	By matching	By MS/MS	By MS/MS	By matching	By matching	By matching	5.3	5.3	5.3	5.3	5.3	5.3
V9GXA5;G3UW90;V9GX74;Q925H1;Q80V18;V9GXE9	V9GXA5;G3UW90;V9GX74;Q925H1;Q80V18;V9GXE9	3;3;3;3;2;2	3;3;3;3;2;2	3;3;3;3;2;2	Zinc finger transcription factor Trps1	Trps1	tr|V9GXA5|V9GXA5_MOUSE Zinc finger transcription factor Trps1 OS=Mus musculus OX=10090 GN=Trps1 PE=1 SV=1;tr|G3UW90|G3UW90_MOUSE Trichorhinophalangeal syndrome I (Human), isoform CRA_b OS=Mus musculus OX=10090 GN=Trps1 PE=1 SV=1;tr|V9GX74|V9GX74_MOUSE Zinc	6	3	3	3	3	3	3	1	2	0	3	3	3	1	2	0	3	3	3	1	2	0	3.8	3.8	3.8	109.98	994	994;1281;1285;1281;1035;1096	0	17.301	By MS/MS	By MS/MS	By MS/MS	By matching	By matching		3.8	3.8	3.8	1.1	2.4	0
G3UWE1;Q52L67;Q9CY27;A0A1D5RLH3	G3UWE1;Q52L67;Q9CY27;A0A1D5RLH3	2;2;2;1	2;2;2;1	2;2;2;1	Very-long-chain enoyl-CoA reductase	Tecr	tr|G3UWE1|G3UWE1_MOUSE MCG11048, isoform CRA_c OS=Mus musculus OX=10090 GN=Tecr PE=1 SV=1;tr|Q52L67|Q52L67_MOUSE Gpsn2 protein OS=Mus musculus OX=10090 GN=Tecr PE=1 SV=1;sp|Q9CY27|TECR_MOUSE Very-long-chain enoyl-CoA reductase OS=Mus musculus OX=10090 GN=T	4	2	2	2	0	2	0	0	1	1	0	2	0	0	1	1	0	2	0	0	1	1	6.5	6.5	6.5	34.244	293	293;362;308;92	0	12.897		By MS/MS			By matching	By matching	0	6.5	0	0	3.4	3.4
G3UX44;P50171	G3UX44;P50171	1;1	1;1	1;1	Estradiol 17-beta-dehydrogenase 8	H2-Ke6;Hsd17b8	tr|G3UX44|G3UX44_MOUSE H2-K region-expressed gene 6 (Fragment) OS=Mus musculus OX=10090 GN=H2-Ke6 PE=1 SV=1;sp|P50171|DHB8_MOUSE Estradiol 17-beta-dehydrogenase 8 OS=Mus musculus OX=10090 GN=Hsd17b8 PE=1 SV=2	2	1	1	1	0	1	1	0	0	0	0	1	1	0	0	0	0	1	1	0	0	0	5.1	5.1	5.1	23.985	234	234;259	0.0054705	6.0057		By MS/MS	By matching				0	5.1	5.1	0	0	0
G3UXT7;Q8CFQ9;P56959	G3UXT7;Q8CFQ9;P56959	8;8;8	8;8;8	6;6;6	RNA-binding protein FUS	Fus	tr|G3UXT7|G3UXT7_MOUSE RNA-binding protein FUS (Fragment) OS=Mus musculus OX=10090 GN=Fus PE=1 SV=1;tr|Q8CFQ9|Q8CFQ9_MOUSE Fusion, derived from t(1216) malignant liposarcoma (Human) OS=Mus musculus OX=10090 GN=Fus PE=1 SV=1;sp|P56959|FUS_MOUSE RNA-binding	3	8	8	6	7	8	6	6	7	7	7	8	6	6	7	7	5	6	5	5	5	5	38.5	38.5	31.5	13.897	130	130;517;518	0	82.372	By MS/MS	By MS/MS	By MS/MS	By MS/MS	By MS/MS	By MS/MS	38.5	38.5	31.5	31.5	38.5	38.5
G3UY38;G5E924;Q8R081	G3UY38;G5E924;Q8R081	2;2;2	2;2;2	2;2;2	Heterogeneous nuclear ribonucleoprotein L	Hnrnpl	tr|G3UY38|G3UY38_MOUSE Heterogeneous nuclear ribonucleoprotein L OS=Mus musculus OX=10090 GN=Hnrnpl PE=1 SV=1;tr|G5E924|G5E924_MOUSE Heterogeneous nuclear ribonucleoprotein L (Fragment) OS=Mus musculus OX=10090 GN=Hnrnpl PE=1 SV=1;sp|Q8R081|HNRPL_MOUSE Het	3	2	2	2	2	2	2	1	0	2	2	2	2	1	0	2	2	2	2	1	0	2	4.4	4.4	4.4	50.564	456	456;615;586	0	14.391	By matching	By MS/MS	By matching	By matching		By matching	4.4	4.4	4.4	2	0	4.4
G3UY93;Q9Z1Q9;G3UYW2;G3UZ22	G3UY93;Q9Z1Q9	3;3;1;1	3;3;1;1	3;3;1;1	Valine--tRNA ligase	Vars	tr|G3UY93|G3UY93_MOUSE Valine--tRNA ligase (Fragment) OS=Mus musculus OX=10090 GN=Vars PE=1 SV=1;sp|Q9Z1Q9|SYVC_MOUSE Valine--tRNA ligase OS=Mus musculus OX=10090 GN=Vars PE=1 SV=1	4	3	3	3	2	2	3	3	3	3	2	2	3	3	3	3	2	2	3	3	3	3	3.3	3.3	3.3	141.41	1278	1278;1263;125;230	0	22.723	By MS/MS	By MS/MS	By MS/MS	By matching	By MS/MS	By matching	2.1	2.1	3.3	3.3	3.3	3.3
G3UYV7;P62858	G3UYV7;P62858	1;1	1;1	1;1	40S ribosomal protein S28	Rps28	tr|G3UYV7|G3UYV7_MOUSE 40S ribosomal protein S28 (Fragment) OS=Mus musculus OX=10090 GN=Rps28 PE=1 SV=1;sp|P62858|RS28_MOUSE 40S ribosomal protein S28 OS=Mus musculus OX=10090 GN=Rps28 PE=1 SV=1	2	1	1	1	1	1	1	1	1	1	1	1	1	1	1	1	1	1	1	1	1	1	16.1	16.1	16.1	6.3442	56	56;69	0	6.3413	By MS/MS	By MS/MS	By MS/MS	By MS/MS	By MS/MS	By MS/MS	16.1	16.1	16.1	16.1	16.1	16.1
G3UZS3;Q4FE56;P70398	G3UZS3;Q4FE56;P70398	1;1;1	1;1;1	1;1;1	Ubiquitin carboxyl-terminal hydrolase;Probable ubiquitin carboxyl-terminal hydrolase FAF-X	Usp9x	tr|G3UZS3|G3UZS3_MOUSE Probable ubiquitin carboxyl-terminal hydrolase FAF-X (Fragment) OS=Mus musculus OX=10090 GN=Usp9x PE=1 SV=1;tr|Q4FE56|Q4FE56_MOUSE Probable ubiquitin carboxyl-terminal hydrolase FAF-X OS=Mus musculus OX=10090 GN=Usp9x PE=1 SV=1;sp|P7	3	1	1	1	1	1	1	0	1	1	1	1	1	0	1	1	1	1	1	0	1	1	4.9	4.9	4.9	39.513	345	345;2554;2559	0	7.1869	By MS/MS	By matching	By MS/MS		By matching	By matching	4.9	4.9	4.9	0	4.9	4.9
H3BIW0;G3X8T2;Q0P678;H3BJJ9	H3BIW0;G3X8T2;Q0P678	3;3;3;1	3;3;3;1	3;3;3;1	Zinc finger CCCH domain-containing protein 18	Zc3h18	tr|H3BIW0|H3BIW0_MOUSE Zinc finger CCCH domain-containing protein 18 OS=Mus musculus OX=10090 GN=Zc3h18 PE=1 SV=1;tr|G3X8T2|G3X8T2_MOUSE RIKEN cDNA 5830416A07, isoform CRA_c OS=Mus musculus OX=10090 GN=Zc3h18 PE=1 SV=1;sp|Q0P678|ZCH18_MOUSE Zinc finger CCC	4	3	3	3	3	2	2	1	0	1	3	2	2	1	0	1	3	2	2	1	0	1	3.3	3.3	3.3	106.14	950	950;972;948;241	0	17.368	By MS/MS	By MS/MS	By MS/MS	By matching		By matching	3.3	2.4	2.4	0.8	0	1.6
G3X8V5;Q8K2Y0;A0A2I3BRT6	G3X8V5;Q8K2Y0;A0A2I3BRT6	2;2;1	2;2;1	2;2;1	RING finger protein 219	Rnf219	tr|G3X8V5|G3X8V5_MOUSE RIKEN cDNA 2610206B13, isoform CRA_b OS=Mus musculus OX=10090 GN=Rnf219 PE=1 SV=1;sp|Q8K2Y0|RN219_MOUSE RING finger protein 219 OS=Mus musculus OX=10090 GN=Rnf219 PE=1 SV=2;tr|A0A2I3BRT6|A0A2I3BRT6_MOUSE RIKEN cDNA 2610206B13, isofor	3	2	2	2	1	2	1	0	0	0	1	2	1	0	0	0	1	2	1	0	0	0	2.2	2.2	2.2	79.975	722	722;722;235	0	10.97	By matching	By MS/MS	By MS/MS				1.1	2.2	1.1	0	0	0
S4R1Y5;G3X926;Q9JJ80;S4R2H5;S4R2R2	S4R1Y5;G3X926;Q9JJ80;S4R2H5	3;3;3;2;1	3;3;3;2;1	3;3;3;2;1	Ribosome production factor 2 homolog	Rpf2	tr|S4R1Y5|S4R1Y5_MOUSE Ribosome production factor 2 homolog (Fragment) OS=Mus musculus OX=10090 GN=Rpf2 PE=1 SV=1;tr|G3X926|G3X926_MOUSE MCG1407, isoform CRA_a OS=Mus musculus OX=10090 GN=Rpf2 PE=1 SV=1;sp|Q9JJ80|RPF2_MOUSE Ribosome production factor 2 hom	5	3	3	3	3	2	3	1	2	2	3	2	3	1	2	2	3	2	3	1	2	2	14	14	14	29.66	257	257;273;306;205;153	0	21.271	By MS/MS	By MS/MS	By MS/MS	By matching	By MS/MS	By MS/MS	14	8.9	14	3.9	8.9	8.9
G3X9I4;Q9JJW6;O08583	G3X9I4;Q9JJW6;O08583	2;2;2	2;2;2	2;2;2	Aly/REF export factor 2;THO complex subunit 4	Alyref2;Alyref	tr|G3X9I4|G3X9I4_MOUSE Aly/REF export factor 2 OS=Mus musculus OX=10090 GN=Alyref2 PE=1 SV=1;sp|Q9JJW6|ALRF2_MOUSE Aly/REF export factor 2 OS=Mus musculus OX=10090 GN=Alyref2 PE=1 SV=1;sp|O08583|THOC4_MOUSE THO complex subunit 4 OS=Mus musculus OX=10090 GN	3	2	2	2	1	2	1	1	1	0	1	2	1	1	1	0	1	2	1	1	1	0	17	17	17	23.785	218	218;218;255	0	13.54	By MS/MS	By matching	By matching	By matching	By MS/MS		11.9	17	11.9	11.9	5	0
Q68FL0;G5E8Y0;G3X9J1;P70414	Q68FL0;G5E8Y0;G3X9J1;P70414	1;1;1;1	1;1;1;1	1;1;1;1	Sodium/calcium exchanger 1	Slc8a1	tr|Q68FL0|Q68FL0_MOUSE Slc8a1 protein OS=Mus musculus OX=10090 GN=Slc8a1 PE=1 SV=1;tr|G5E8Y0|G5E8Y0_MOUSE Sodium/calcium exchanger 1 OS=Mus musculus OX=10090 GN=Slc8a1 PE=1 SV=2;tr|G3X9J1|G3X9J1_MOUSE Sodium/calcium exchanger 1 OS=Mus musculus OX=10090 GN=	4	1	1	1	0	1	0	0	0	0	0	1	0	0	0	0	0	1	0	0	0	0	0.7	0.7	0.7	106.66	958	958;970;970;970	0.0033898	6.085		By MS/MS					0	0.7	0	0	0	0
G3X9W3;Q80VQ1	G3X9W3;Q80VQ1	1;1	1;1	1;1	Leucine-rich repeat-containing protein 1	Lrrc1	tr|G3X9W3|G3X9W3_MOUSE Leucine rich repeat containing 1, isoform CRA_b OS=Mus musculus OX=10090 GN=Lrrc1 PE=1 SV=1;sp|Q80VQ1|LRRC1_MOUSE Leucine-rich repeat-containing protein 1 OS=Mus musculus OX=10090 GN=Lrrc1 PE=1 SV=2	2	1	1	1	1	1	1	0	0	0	1	1	1	0	0	0	1	1	1	0	0	0	2.9	2.9	2.9	53.805	479	479;524	0	7.7331	By matching	By MS/MS	By MS/MS				2.9	2.9	2.9	0	0	0
G5E829	G5E829	1	1	1	Plasma membrane calcium-transporting ATPase 1	Atp2b1	sp|G5E829|AT2B1_MOUSE Plasma membrane calcium-transporting ATPase 1 OS=Mus musculus OX=10090 GN=Atp2b1 PE=1 SV=1	1	1	1	1	0	1	1	0	0	0	0	1	1	0	0	0	0	1	1	0	0	0	0.9	0.9	0.9	134.75	1220	1220	0	6.9333		By matching	By MS/MS				0	0.9	0.9	0	0	0
G5E846;P15331;A0A2R8W6R6;G3X981;A0A2R8VKR9	G5E846;P15331;A0A2R8W6R6;G3X981	18;18;16;16;1	15;15;13;13;1	15;15;13;13;1	Peripherin	Prph	tr|G5E846|G5E846_MOUSE Peripherin OS=Mus musculus OX=10090 GN=Prph PE=1 SV=1;sp|P15331|PERI_MOUSE Peripherin OS=Mus musculus OX=10090 GN=Prph PE=1 SV=2;tr|A0A2R8W6R6|A0A2R8W6R6_MOUSE Peripherin OS=Mus musculus OX=10090 GN=Prph PE=1 SV=1;tr|G3X981|G3X981_MO	5	18	15	15	14	17	16	7	14	14	11	14	13	7	12	12	11	14	13	7	12	12	30.1	26.1	26.1	54.297	475	475;475;506;507;48	0	134.66	By MS/MS	By MS/MS	By MS/MS	By MS/MS	By MS/MS	By MS/MS	25.5	28.2	27.4	13.5	25.3	25.3
G5E866;Q99NB9;A0A087WNS2	G5E866;Q99NB9	3;3;1	3;3;1	3;3;1	Splicing factor 3B subunit 1	Sf3b1	tr|G5E866|G5E866_MOUSE Splicing factor 3B subunit 1 OS=Mus musculus OX=10090 GN=Sf3b1 PE=1 SV=1;sp|Q99NB9|SF3B1_MOUSE Splicing factor 3B subunit 1 OS=Mus musculus OX=10090 GN=Sf3b1 PE=1 SV=1	3	3	3	3	2	2	2	1	1	2	2	2	2	1	1	2	2	2	2	1	1	2	2.8	2.8	2.8	145.83	1304	1304;1304;144	0	17.804	By MS/MS	By MS/MS	By MS/MS	By matching	By matching	By matching	2.1	1.9	2.1	1.2	1.2	2.1
G5E8R2;G5E8R1;G5E8R0;E9Q453;E9Q456;E9Q455;E9Q450;E9Q448;B7ZNL3;F8WID5;S4R2U0;E9Q452;Q8BSH3;Q8BP43;CON__Q3SX28;A2AIM4;A0A0R4J1P2;E9Q5J9;E9Q454;P58774;P58771;P21107;S4R261	G5E8R2;G5E8R1;G5E8R0;E9Q453;E9Q456;E9Q455;E9Q450;E9Q448;B7ZNL3;F8WID5;S4R2U0;E9Q452;Q8BSH3;Q8BP43;CON__Q3SX28;A2AIM4;A0A0R4J1P2;E9Q5J9;E9Q454;P58774;P58771;P21107	4;4;3;3;3;3;3;3;3;3;2;2;2;2;2;2;2;2;2;2;2;2;1	2;2;1;1;1;1;1;1;1;1;0;0;0;0;0;0;0;0;0;0;0;0;1	2;2;1;1;1;1;1;1;1;1;0;0;0;0;0;0;0;0;0;0;0;0;1	Tropomyosin beta chain;Tropomyosin alpha-1 chain;Tropomyosin alpha-3 chain	Tpm1;Tpm2;Tpm3	tr|G5E8R2|G5E8R2_MOUSE Tropomyosin 1, alpha, isoform CRA_k OS=Mus musculus OX=10090 GN=Tpm1 PE=1 SV=1;tr|G5E8R1|G5E8R1_MOUSE Tropomyosin 1, alpha, isoform CRA_j OS=Mus musculus OX=10090 GN=Tpm1 PE=1 SV=1;tr|G5E8R0|G5E8R0_MOUSE Tropomyosin 1, alpha, isoform	23	4	2	2	4	3	3	4	4	4	2	2	1	2	2	2	2	2	1	2	2	2	16.1	8.1	8.1	28.696	248	248;248;245;245;248;251;284;284;284;326;157;281;284;284;284;284;284;285;287;284;284;285;49	0	12.018	By MS/MS	By MS/MS	By MS/MS	By matching	By matching	By matching	16.1	10.9	12.9	16.1	16.1	16.1
G5E8T3;Q9D104	G5E8T3;Q9D104	1;1	1;1	1;1		Srp19	tr|G5E8T3|G5E8T3_MOUSE Signal recognition particle 19 kDa protein OS=Mus musculus OX=10090 GN=Srp19 PE=1 SV=1;tr|Q9D104|Q9D104_MOUSE Signal recognition particle 19 kDa protein OS=Mus musculus OX=10090 GN=Srp19 PE=1 SV=1	2	1	1	1	1	0	1	0	1	1	1	0	1	0	1	1	1	0	1	0	1	1	12.5	12.5	12.5	13.621	120	120;144	0	6.3941	By matching		By MS/MS		By matching	By matching	12.5	0	12.5	0	12.5	12.5
G5E902;Q8VEM8	G5E902;Q8VEM8	1;1	1;1	1;1	Phosphate carrier protein, mitochondrial	Slc25a3	tr|G5E902|G5E902_MOUSE MCG10343, isoform CRA_b OS=Mus musculus OX=10090 GN=Slc25a3 PE=1 SV=1;sp|Q8VEM8|MPCP_MOUSE Phosphate carrier protein, mitochondrial OS=Mus musculus OX=10090 GN=Slc25a3 PE=1 SV=1	2	1	1	1	1	1	1	1	1	1	1	1	1	1	1	1	1	1	1	1	1	1	3.4	3.4	3.4	39.736	358	358;357	0	13.171	By MS/MS	By MS/MS	By MS/MS	By matching	By matching	By matching	3.4	3.4	3.4	3.4	3.4	3.4
G8JL51;Q8K202	G8JL51;Q8K202	2;2	2;2	2;2	DNA-directed RNA polymerase I subunit RPA49	Polr1e	tr|G8JL51|G8JL51_MOUSE DNA-directed RNA polymerase I subunit RPA49 (Fragment) OS=Mus musculus OX=10090 GN=Polr1e PE=1 SV=1;sp|Q8K202|RPA49_MOUSE DNA-directed RNA polymerase I subunit RPA49 OS=Mus musculus OX=10090 GN=Polr1e PE=1 SV=2	2	2	2	2	2	2	1	2	1	0	2	2	1	2	1	0	2	2	1	2	1	0	5.2	5.2	5.2	45.828	407	407;482	0	11.428	By MS/MS	By MS/MS	By MS/MS	By matching	By matching		5.2	5.2	2.2	5.2	2.2	0
H3BKW0;H3BJ30;H3BJW3;Q6NVF9	H3BKW0;H3BJ30;H3BJW3;Q6NVF9	1;1;1;1	1;1;1;1	1;1;1;1	Cleavage and polyadenylation specificity factor subunit 6	Cpsf6	tr|H3BKW0|H3BKW0_MOUSE Cleavage and polyadenylation-specificity factor subunit 6 (Fragment) OS=Mus musculus OX=10090 GN=Cpsf6 PE=1 SV=1;tr|H3BJ30|H3BJ30_MOUSE Cleavage and polyadenylation-specificity factor subunit 6 OS=Mus musculus OX=10090 GN=Cpsf6 PE=1	4	1	1	1	1	1	1	1	1	1	1	1	1	1	1	1	1	1	1	1	1	1	4.9	4.9	4.9	21.248	182	182;552;588;551	0.0034247	6.1143	By matching	By matching	By MS/MS	By matching	By matching	By matching	4.9	4.9	4.9	4.9	4.9	4.9
H3BJU7;H3BJX8;H3BJ45;H3BJ40;H3BKH9;Q60875	H3BJU7;H3BJX8;H3BJ45;H3BJ40;H3BKH9;Q60875	3;3;3;3;3;3	3;3;3;3;3;3	3;3;3;3;3;3	Rho guanine nucleotide exchange factor 2	Arhgef2	tr|H3BJU7|H3BJU7_MOUSE Rho guanine nucleotide exchange factor 2 OS=Mus musculus OX=10090 GN=Arhgef2 PE=1 SV=1;tr|H3BJX8|H3BJX8_MOUSE Rho guanine nucleotide exchange factor 2 OS=Mus musculus OX=10090 GN=Arhgef2 PE=1 SV=1;tr|H3BJ45|H3BJ45_MOUSE Rho guanine n	6	3	3	3	3	2	2	2	2	2	3	2	2	2	2	2	3	2	2	2	2	2	2.8	2.8	2.8	108.59	956	956;968;968;970;983;985	0	18.616	By MS/MS	By MS/MS	By MS/MS	By matching	By matching	By MS/MS	2.8	1.8	1.8	2.1	2.1	2.1
H3BJB7;H3BLI5;Q8R0K4	H3BJB7;H3BLI5;Q8R0K4	1;1;1	1;1;1	1;1;1	Coiled-coil domain-containing protein 137	Ccdc137	tr|H3BJB7|H3BJB7_MOUSE Coiled-coil domain-containing protein 137 (Fragment) OS=Mus musculus OX=10090 GN=Ccdc137 PE=1 SV=2;tr|H3BLI5|H3BLI5_MOUSE Coiled-coil domain-containing protein 137 (Fragment) OS=Mus musculus OX=10090 GN=Ccdc137 PE=1 SV=1;sp|Q8R0K4|CC	3	1	1	1	1	1	1	0	1	1	1	1	1	0	1	1	1	1	1	0	1	1	9	9	9	12.396	111	111;241;290	0	7.0785	By MS/MS	By MS/MS	By MS/MS		By matching	By matching	9	9	9	0	9	9
H3BKN0;Q1HFZ0	H3BKN0;Q1HFZ0	2;2	2;2	2;2	tRNA (cytosine(34)-C(5))-methyltransferase	Nsun2	tr|H3BKN0|H3BKN0_MOUSE tRNA (cytosine(34)-C(5))-methyltransferase OS=Mus musculus OX=10090 GN=Nsun2 PE=1 SV=1;sp|Q1HFZ0|NSUN2_MOUSE tRNA (cytosine(34)-C(5))-methyltransferase OS=Mus musculus OX=10090 GN=Nsun2 PE=1 SV=2	2	2	2	2	2	1	2	2	1	1	2	1	2	2	1	1	2	1	2	2	1	1	3.7	3.7	3.7	81.373	722	722;757	0	21.731	By MS/MS	By MS/MS	By MS/MS	By matching	By MS/MS	By matching	3.7	2.5	3.7	3.7	2.5	2.5
V9GXV7;H3BL40	V9GXV7;H3BL40	1;1	1;1	1;1		Rgsl1	tr|V9GXV7|V9GXV7_MOUSE Regulator of G-protein-signaling-like 1 OS=Mus musculus OX=10090 GN=Rgsl1 PE=4 SV=1;tr|H3BL40|H3BL40_MOUSE Regulator of G-protein-signaling-like 1 OS=Mus musculus OX=10090 GN=Rgsl1 PE=4 SV=1	2	1	1	1	0	1	0	0	0	0	0	1	0	0	0	0	0	1	0	0	0	0	1	1	1	113.06	970	970;1073	0.0054289	5.9969		By MS/MS					0	1	0	0	0	0
H3BL49;P42932;H3BJB6;H3BKR8;H3BLL1;H3BKG2	H3BL49;P42932;H3BJB6	16;16;10;2;1;1	16;16;10;2;1;1	16;16;10;2;1;1	T-complex protein 1 subunit theta	Cct8	tr|H3BL49|H3BL49_MOUSE T-complex protein 1 subunit theta OS=Mus musculus OX=10090 GN=Cct8 PE=1 SV=1;sp|P42932|TCPQ_MOUSE T-complex protein 1 subunit theta OS=Mus musculus OX=10090 GN=Cct8 PE=1 SV=3;tr|H3BJB6|H3BJB6_MOUSE T-complex protein 1 subunit theta (	6	16	16	16	14	15	15	13	15	15	14	15	15	13	15	15	14	15	15	13	15	15	31.7	31.7	31.7	53.082	489	489;548;239;71;132;158	0	135.92	By MS/MS	By MS/MS	By MS/MS	By MS/MS	By MS/MS	By MS/MS	29.9	29.4	29.9	26.4	29.9	29.9
H7BX95;Q6PDM2;F7AI47	H7BX95;Q6PDM2	6;6;1	6;6;1	5;5;1	Serine/arginine-rich splicing factor 1	Srsf1	tr|H7BX95|H7BX95_MOUSE Serine/arginine-rich-splicing factor 1 OS=Mus musculus OX=10090 GN=Srsf1 PE=1 SV=1;sp|Q6PDM2|SRSF1_MOUSE Serine/arginine-rich splicing factor 1 OS=Mus musculus OX=10090 GN=Srsf1 PE=1 SV=3	3	6	6	5	5	5	4	3	5	4	5	5	4	3	5	4	5	4	4	3	5	4	20.9	20.9	18.2	28.329	253	253;248;106	0	38.673	By MS/MS	By MS/MS	By MS/MS	By MS/MS	By MS/MS	By MS/MS	18.2	18.2	14.2	11.5	18.2	14.2
H7BXC3;P17751	H7BXC3;P17751	1;1	1;1	1;1	Triosephosphate isomerase	Tpi1	tr|H7BXC3|H7BXC3_MOUSE Triosephosphate isomerase OS=Mus musculus OX=10090 GN=Tpi1 PE=1 SV=1;sp|P17751|TPIS_MOUSE Triosephosphate isomerase OS=Mus musculus OX=10090 GN=Tpi1 PE=1 SV=4	2	1	1	1	1	1	1	1	1	1	1	1	1	1	1	1	1	1	1	1	1	1	7.2	7.2	7.2	17.997	167	167;299	0	12.407	By MS/MS	By MS/MS	By MS/MS	By matching	By MS/MS	By MS/MS	7.2	7.2	7.2	7.2	7.2	7.2
I7HLV2;Q6ZWV3;P86048	I7HLV2;Q6ZWV3;P86048	3;3;2	3;3;2	3;3;2	60S ribosomal protein L10;60S ribosomal protein L10-like	Rpl10;Rpl10l	tr|I7HLV2|I7HLV2_MOUSE 60S ribosomal protein L10 (Fragment) OS=Mus musculus OX=10090 GN=Rpl10 PE=1 SV=1;sp|Q6ZWV3|RL10_MOUSE 60S ribosomal protein L10 OS=Mus musculus OX=10090 GN=Rpl10 PE=1 SV=3;sp|P86048|RL10L_MOUSE 60S ribosomal protein L10-like OS=Mus m	3	3	3	3	3	3	2	2	3	2	3	3	2	2	3	2	3	3	2	2	3	2	16.4	16.4	16.4	23.072	201	201;214;214	0	19.33	By MS/MS	By MS/MS	By MS/MS	By matching	By matching	By matching	16.4	16.4	12.4	10	16.4	10
I7HPB2;Z4YJQ4;Q9DC04	I7HPB2;Z4YJQ4;Q9DC04	1;1;1	1;1;1	1;1;1	Regulator of G-protein signaling 3	Rgs3	tr|I7HPB2|I7HPB2_MOUSE Regulator of G-protein-signaling 3 OS=Mus musculus OX=10090 GN=Rgs3 PE=1 SV=1;tr|Z4YJQ4|Z4YJQ4_MOUSE MCG7138 OS=Mus musculus OX=10090 GN=Rgs3 PE=1 SV=1;sp|Q9DC04|RGS3_MOUSE Regulator of G-protein signaling 3 OS=Mus musculus OX=10090	3	1	1	1	1	1	1	0	0	0	1	1	1	0	0	0	1	1	1	0	0	0	1.8	1.8	1.8	67.569	602	602;610;966	0.0053191	5.9335	By matching	By matching	By MS/MS				1.8	1.8	1.8	0	0	0
J3QMX2;Q3TKD0;Q8BFY9	J3QMX2;Q3TKD0;Q8BFY9	1;1;1	1;1;1	1;1;1	Transportin-1	Tnpo1	tr|J3QMX2|J3QMX2_MOUSE Transportin-1 (Fragment) OS=Mus musculus OX=10090 GN=Tnpo1 PE=1 SV=1;tr|Q3TKD0|Q3TKD0_MOUSE Transportin-1 (Fragment) OS=Mus musculus OX=10090 GN=Tnpo1 PE=1 SV=1;sp|Q8BFY9|TNPO1_MOUSE Transportin-1 OS=Mus musculus OX=10090 GN=Tnpo1 PE	3	1	1	1	1	1	1	0	0	0	1	1	1	0	0	0	1	1	1	0	0	0	6.2	6.2	6.2	20.116	178	178;807;898	0.0011737	6.2103	By matching	By MS/MS	By MS/MS				6.2	6.2	6.2	0	0	0
J3QNY1;A2AL12;B2RXM2;Q8BG05;A2AL13;V9GX38	J3QNY1;A2AL12;B2RXM2;Q8BG05	7;6;6;6;3;1	6;5;6;5;2;1	6;5;6;5;2;1	Heterogeneous nuclear ribonucleoprotein A3	Gm9242;Hnrnpa3;Gm6793	tr|J3QNY1|J3QNY1_MOUSE Uncharacterized protein OS=Mus musculus OX=10090 GN=Gm9242 PE=4 SV=1;tr|A2AL12|A2AL12_MOUSE Heterogeneous nuclear ribonucleoprotein A3 OS=Mus musculus OX=10090 GN=Hnrnpa3 PE=1 SV=1;tr|B2RXM2|B2RXM2_MOUSE EG627828 protein OS=Mus muscu	6	7	6	6	6	6	7	5	4	4	5	6	6	5	4	4	5	6	6	5	4	4	21	19	19	37.14	357	357;318;351;379;194;357	0	71.742	By MS/MS	By MS/MS	By MS/MS	By MS/MS	By MS/MS	By MS/MS	17.4	19	21	15.4	14.6	14.6
J3QP71;K3W4Q8;P18572	J3QP71;K3W4Q8;P18572	5;5;5	5;5;5	5;5;5	Basigin	Bsg	tr|J3QP71|J3QP71_MOUSE Basigin (Fragment) OS=Mus musculus OX=10090 GN=Bsg PE=1 SV=1;tr|K3W4Q8|K3W4Q8_MOUSE Basigin OS=Mus musculus OX=10090 GN=Bsg PE=1 SV=1;sp|P18572|BASI_MOUSE Basigin OS=Mus musculus OX=10090 GN=Bsg PE=1 SV=2	3	5	5	5	4	5	5	3	4	5	4	5	5	3	4	5	4	5	5	3	4	5	25.9	25.9	25.9	21.602	197	197;218;389	0	49.623	By MS/MS	By MS/MS	By MS/MS	By matching	By MS/MS	By MS/MS	20.3	25.9	25.9	13.7	20.3	25.9
M0QWN2;Q91YS7;Q63932	M0QWN2;Q91YS7;Q63932	1;1;1	1;1;1	1;1;1	Dual specificity mitogen-activated protein kinase kinase 2	Map2k2	tr|M0QWN2|M0QWN2_MOUSE Dual-specificity mitogen-activated protein kinase kinase 2 OS=Mus musculus OX=10090 GN=Map2k2 PE=1 SV=1;tr|Q91YS7|Q91YS7_MOUSE Dual-specificity mitogen-activated protein kinase kinase 2 OS=Mus musculus OX=10090 GN=Map2k2 PE=1 SV=1;sp	3	1	1	1	1	1	1	1	0	0	1	1	1	1	0	0	1	1	1	1	0	0	6.9	6.9	6.9	22.45	203	203;400;401	0.002291	6.1279	By MS/MS	By MS/MS	By matching	By matching			6.9	6.9	6.9	6.9	0	0
M0QWS6;M0QWZ1;Q8CGI1	M0QWS6;M0QWZ1;Q8CGI1	1;1;1	1;1;1	1;1;1	Protein FAM193A	Fam193a	tr|M0QWS6|M0QWS6_MOUSE Protein FAM193A (Fragment) OS=Mus musculus OX=10090 GN=Fam193a PE=1 SV=1;tr|M0QWZ1|M0QWZ1_MOUSE Protein FAM193A OS=Mus musculus OX=10090 GN=Fam193a PE=1 SV=1;sp|Q8CGI1|F193A_MOUSE Protein FAM193A OS=Mus musculus OX=10090 GN=Fam193a P	3	1	1	1	1	1	1	0	0	0	1	1	1	0	0	0	1	1	1	0	0	0	7.5	7.5	7.5	15.341	134	134;1517;1231	0.0081716	5.8464	By MS/MS	By MS/MS	By MS/MS				7.5	7.5	7.5	0	0	0
M0QWX4;P59110	M0QWX4;P59110	2;2	2;2	2;2	Sentrin-specific protease 1	Senp1	tr|M0QWX4|M0QWX4_MOUSE Sentrin-specific protease 1 OS=Mus musculus OX=10090 GN=Senp1 PE=1 SV=1;sp|P59110|SENP1_MOUSE Sentrin-specific protease 1 OS=Mus musculus OX=10090 GN=Senp1 PE=1 SV=1	2	2	2	2	2	2	2	0	0	0	2	2	2	0	0	0	2	2	2	0	0	0	3	3	3	75.521	666	666;640	0	14.821	By MS/MS	By MS/MS	By MS/MS				3	3	3	0	0	0
O08547;A0A0G2JF08;E9Q6R3	O08547;A0A0G2JF08;E9Q6R3	2;1;1	2;1;1	2;1;1	Vesicle-trafficking protein SEC22b	Sec22b	sp|O08547|SC22B_MOUSE Vesicle-trafficking protein SEC22b OS=Mus musculus OX=10090 GN=Sec22b PE=1 SV=3;tr|A0A0G2JF08|A0A0G2JF08_MOUSE Vesicle-trafficking protein SEC22b OS=Mus musculus OX=10090 GN=Sec22b PE=1 SV=1;tr|E9Q6R3|E9Q6R3_MOUSE Vesicle-trafficking	3	2	2	2	2	2	2	0	0	1	2	2	2	0	0	1	2	2	2	0	0	1	9.3	9.3	9.3	24.74	215	215;62;166	0	14.223	By MS/MS	By MS/MS	By matching			By matching	9.3	9.3	9.3	0	0	4.7
O08553;Q6P1J1;P97427;Q71H75	O08553;Q6P1J1;P97427	4;3;3;1	2;1;1;1	2;1;1;1	Dihydropyrimidinase-related protein 2;Dihydropyrimidinase-related protein 1	Dpysl2;Crmp1	sp|O08553|DPYL2_MOUSE Dihydropyrimidinase-related protein 2 OS=Mus musculus OX=10090 GN=Dpysl2 PE=1 SV=2;tr|Q6P1J1|Q6P1J1_MOUSE Crmp1 protein OS=Mus musculus OX=10090 GN=Crmp1 PE=1 SV=1;sp|P97427|DPYL1_MOUSE Dihydropyrimidinase-related protein 1 OS=Mus mus	4	4	2	2	4	4	4	3	4	4	2	2	2	1	2	2	2	2	2	1	2	2	8.2	4	4	62.277	572	572;686;572;191	0	14.673	By MS/MS	By MS/MS	By MS/MS	By matching	By MS/MS	By MS/MS	8.2	8.2	8.2	5.9	8.2	8.2
O08579;Q3THM8;B7FAU5;I7HJS1	O08579;Q3THM8;B7FAU5;I7HJS1	5;4;4;4	5;4;4;4	5;4;4;4	Emerin	Emd	sp|O08579|EMD_MOUSE Emerin OS=Mus musculus OX=10090 GN=Emd PE=1 SV=1;tr|Q3THM8|Q3THM8_MOUSE Emerin OS=Mus musculus OX=10090 GN=Emd PE=1 SV=1;tr|B7FAU5|B7FAU5_MOUSE Emerin OS=Mus musculus OX=10090 GN=Emd PE=1 SV=1;tr|I7HJS1|I7HJS1_MOUSE Emerin OS=Mus muscul	4	5	5	5	4	4	4	1	2	2	4	4	4	1	2	2	4	4	4	1	2	2	21.6	21.6	21.6	29.435	259	259;158;170;223	0	35.298	By MS/MS	By MS/MS	By MS/MS	By matching	By matching	By matching	18.5	17.4	17.4	4.6	7.7	7.7
O08749	O08749	2	2	2	Dihydrolipoyl dehydrogenase, mitochondrial	Dld	sp|O08749|DLDH_MOUSE Dihydrolipoyl dehydrogenase, mitochondrial OS=Mus musculus OX=10090 GN=Dld PE=1 SV=2	1	2	2	2	2	2	1	0	1	2	2	2	1	0	1	2	2	2	1	0	1	2	3.7	3.7	3.7	54.272	509	509	0	12.687	By MS/MS	By MS/MS	By matching		By matching	By matching	3.7	3.7	1.6	0	1.6	3.7
O09111	O09111	1	1	1	NADH dehydrogenase [ubiquinone] 1 beta subcomplex subunit 11, mitochondrial	Ndufb11	sp|O09111|NDUBB_MOUSE NADH dehydrogenase [ubiquinone] 1 beta subcomplex subunit 11, mitochondrial OS=Mus musculus OX=10090 GN=Ndufb11 PE=1 SV=2	1	1	1	1	1	1	1	0	1	0	1	1	1	0	1	0	1	1	1	0	1	0	6.6	6.6	6.6	17.444	151	151	0	7.6589	By MS/MS	By MS/MS	By MS/MS		By matching		6.6	6.6	6.6	0	6.6	0
O35129;F6QPR1	O35129	3;1	3;1	3;1	Prohibitin-2	Phb2	sp|O35129|PHB2_MOUSE Prohibitin-2 OS=Mus musculus OX=10090 GN=Phb2 PE=1 SV=1	2	3	3	3	2	3	2	1	1	0	2	3	2	1	1	0	2	3	2	1	1	0	10.7	10.7	10.7	33.296	299	299;157	0	31.53	By MS/MS	By MS/MS	By MS/MS	By matching	By matching		10	10.7	10	6.7	6.7	0
O35134;A0A0U1RPM9	O35134;A0A0U1RPM9	2;1	2;1	2;1	DNA-directed RNA polymerase I subunit RPA1	Polr1a	sp|O35134|RPA1_MOUSE DNA-directed RNA polymerase I subunit RPA1 OS=Mus musculus OX=10090 GN=Polr1a PE=1 SV=2;tr|A0A0U1RPM9|A0A0U1RPM9_MOUSE DNA-directed RNA polymerase I subunit RPA1 (Fragment) OS=Mus musculus OX=10090 GN=Polr1a PE=1 SV=1	2	2	2	2	1	2	2	0	1	0	1	2	2	0	1	0	1	2	2	0	1	0	1.2	1.2	1.2	194.11	1717	1717;743	0	13.788	By MS/MS	By MS/MS	By MS/MS		By matching		0.6	1.2	1.2	0	0.6	0
O35226;F7AI87	O35226	4;1	4;1	4;1	26S proteasome non-ATPase regulatory subunit 4	Psmd4	sp|O35226|PSMD4_MOUSE 26S proteasome non-ATPase regulatory subunit 4 OS=Mus musculus OX=10090 GN=Psmd4 PE=1 SV=1	2	4	4	4	4	4	4	0	1	1	4	4	4	0	1	1	4	4	4	0	1	1	14.9	14.9	14.9	40.703	376	376;194	0	29.056	By MS/MS	By MS/MS	By MS/MS		By matching	By matching	14.9	14.9	14.9	0	2.1	2.9
O35295	O35295	2	2	2	Transcriptional activator protein Pur-beta	Purb	sp|O35295|PURB_MOUSE Transcriptional activator protein Pur-beta OS=Mus musculus OX=10090 GN=Purb PE=1 SV=3	1	2	2	2	1	2	2	1	1	1	1	2	2	1	1	1	1	2	2	1	1	1	12	12	12	33.901	324	324	0	16.471	By MS/MS	By MS/MS	By MS/MS	By matching	By matching	By matching	6.5	12	12	6.5	6.5	6.5
O35343	O35343	1	1	1	Importin subunit alpha-3	Kpna4	sp|O35343|IMA3_MOUSE Importin subunit alpha-3 OS=Mus musculus OX=10090 GN=Kpna4 PE=1 SV=1	1	1	1	1	1	1	1	1	1	1	1	1	1	1	1	1	1	1	1	1	1	1	1.9	1.9	1.9	57.922	521	521	0	9.0321	By MS/MS	By MS/MS	By MS/MS	By matching	By matching	By matching	1.9	1.9	1.9	1.9	1.9	1.9
O35445	O35445	1	1	1	E3 ubiquitin-protein ligase RNF5	Rnf5	sp|O35445|RNF5_MOUSE E3 ubiquitin-protein ligase RNF5 OS=Mus musculus OX=10090 GN=Rnf5 PE=1 SV=1	1	1	1	1	1	0	1	0	0	0	1	0	1	0	0	0	1	0	1	0	0	0	8.3	8.3	8.3	19.837	180	180	0	8.0121	By MS/MS		By MS/MS				8.3	0	8.3	0	0	0
O35465;F6WP10	O35465	4;1	4;1	4;1	Peptidyl-prolyl cis-trans isomerase FKBP8	Fkbp8	sp|O35465|FKBP8_MOUSE Peptidyl-prolyl cis-trans isomerase FKBP8 OS=Mus musculus OX=10090 GN=Fkbp8 PE=1 SV=2	2	4	4	4	4	3	3	0	1	2	4	3	3	0	1	2	4	3	3	0	1	2	10.4	10.4	10.4	43.528	402	402;36	0	24.657	By MS/MS	By MS/MS	By MS/MS		By matching	By matching	10.4	8.5	6.5	0	2	4.5
O35709	O35709	2	2	2	Ectoderm-neural cortex protein 1	Enc1	sp|O35709|ENC1_MOUSE Ectoderm-neural cortex protein 1 OS=Mus musculus OX=10090 GN=Enc1 PE=2 SV=2	1	2	2	2	1	2	0	0	0	0	1	2	0	0	0	0	1	2	0	0	0	0	3.4	3.4	3.4	66.112	589	589	0	12.465	By MS/MS	By MS/MS					2	3.4	0	0	0	0
Q8C2Q7;O35737;P70333	Q8C2Q7;O35737;P70333	3;3;2	2;2;1	2;2;1	Heterogeneous nuclear ribonucleoprotein H;Heterogeneous nuclear ribonucleoprotein H, N-terminally processed;Heterogeneous nuclear ribonucleoprotein H2	Hnrnph1;Hnrnph2	tr|Q8C2Q7|Q8C2Q7_MOUSE Heterogeneous nuclear ribonucleoprotein H OS=Mus musculus OX=10090 GN=Hnrnph1 PE=1 SV=1;sp|O35737|HNRH1_MOUSE Heterogeneous nuclear ribonucleoprotein H OS=Mus musculus OX=10090 GN=Hnrnph1 PE=1 SV=3;sp|P70333|HNRH2_MOUSE Heterogeneous	3	3	2	2	3	3	3	2	3	3	2	2	2	1	2	2	2	2	2	1	2	2	7.4	5.3	5.3	51.217	472	472;449;449	0	14.009	By MS/MS	By MS/MS	By MS/MS	By matching	By MS/MS	By MS/MS	7.4	7.4	7.4	4	7.4	7.4
O35874	O35874	1	1	1	Neutral amino acid transporter A	Slc1a4	sp|O35874|SATT_MOUSE Neutral amino acid transporter A OS=Mus musculus OX=10090 GN=Slc1a4 PE=1 SV=1	1	1	1	1	1	1	1	0	0	1	1	1	1	0	0	1	1	1	1	0	0	1	3.8	3.8	3.8	56.061	532	532	0	11.345	By MS/MS	By MS/MS	By MS/MS			By matching	3.8	3.8	3.8	0	0	3.8
O54941	O54941	3	3	3	SWI/SNF-related matrix-associated actin-dependent regulator of chromatin subfamily E member 1	Smarce1	sp|O54941|SMCE1_MOUSE SWI/SNF-related matrix-associated actin-dependent regulator of chromatin subfamily E member 1 OS=Mus musculus OX=10090 GN=Smarce1 PE=1 SV=1	1	3	3	3	3	0	2	1	1	1	3	0	2	1	1	1	3	0	2	1	1	1	8	8	8	46.638	411	411	0	18.363	By MS/MS		By MS/MS	By matching	By matching	By MS/MS	8	0	5.6	2.4	2.4	2.4
O55029	O55029	1	1	1	Coatomer subunit beta	Copb2	sp|O55029|COPB2_MOUSE Coatomer subunit beta OS=Mus musculus OX=10090 GN=Copb2 PE=1 SV=2	1	1	1	1	1	1	1	1	1	0	1	1	1	1	1	0	1	1	1	1	1	0	1.1	1.1	1.1	102.45	905	905	0	30.056	By MS/MS	By MS/MS	By MS/MS	By matching	By matching		1.1	1.1	1.1	1.1	1.1	0
O55143;Q8R429	O55143	10;3	10;3	10;3	Sarcoplasmic/endoplasmic reticulum calcium ATPase 2	Atp2a2	sp|O55143|AT2A2_MOUSE Sarcoplasmic/endoplasmic reticulum calcium ATPase 2 OS=Mus musculus OX=10090 GN=Atp2a2 PE=1 SV=2	2	10	10	10	9	8	6	4	8	10	9	8	6	4	8	10	9	8	6	4	8	10	10.9	10.9	10.9	114.86	1044	1044;994	0	100.49	By MS/MS	By MS/MS	By MS/MS	By matching	By MS/MS	By MS/MS	9.4	8	5.9	4.9	8	10.9
O55187	O55187	3	3	3	E3 SUMO-protein ligase CBX4	Cbx4	sp|O55187|CBX4_MOUSE E3 SUMO-protein ligase CBX4 OS=Mus musculus OX=10090 GN=Cbx4 PE=1 SV=2	1	3	3	3	3	2	2	0	1	2	3	2	2	0	1	2	3	2	2	0	1	2	6.2	6.2	6.2	60.522	551	551	0	17.922	By MS/MS	By MS/MS	By MS/MS		By matching	By matching	6.2	4.2	4.2	0	1.5	3.4
O70126	O70126	1	1	1	Aurora kinase B	Aurkb	sp|O70126|AURKB_MOUSE Aurora kinase B OS=Mus musculus OX=10090 GN=Aurkb PE=1 SV=2	1	1	1	1	1	1	1	0	0	1	1	1	1	0	0	1	1	1	1	0	0	1	3.5	3.5	3.5	39.384	345	345	0.0054113	5.9819	By MS/MS	By MS/MS	By matching			By matching	3.5	3.5	3.5	0	0	3.5
O70152;A2BDX2	O70152;A2BDX2	2;1	2;1	2;1	Dolichol-phosphate mannosyltransferase subunit 1	Dpm1	sp|O70152|DPM1_MOUSE Dolichol-phosphate mannosyltransferase subunit 1 OS=Mus musculus OX=10090 GN=Dpm1 PE=1 SV=1;tr|A2BDX2|A2BDX2_MOUSE Dolichol-phosphate mannosyltransferase subunit 1 OS=Mus musculus OX=10090 GN=Dpm1 PE=1 SV=1	2	2	2	2	2	2	2	0	1	0	2	2	2	0	1	0	2	2	2	0	1	0	8.8	8.8	8.8	29.174	260	260;208	0	16.236	By MS/MS	By MS/MS	By MS/MS		By matching		8.8	8.8	8.8	0	4.2	0
O70456	O70456	3	1	1	14-3-3 protein sigma	Sfn	sp|O70456|1433S_MOUSE 14-3-3 protein sigma OS=Mus musculus OX=10090 GN=Sfn PE=1 SV=2	1	3	1	1	3	3	3	3	3	3	1	1	1	1	1	1	1	1	1	1	1	1	9.3	3.2	3.2	27.706	248	248	0.0082559	5.8609	By matching	By matching	By matching	By matching	By matching	By MS/MS	9.3	9.3	9.3	9.3	9.3	9.3
O70475	O70475	1	1	1	UDP-glucose 6-dehydrogenase	Ugdh	sp|O70475|UGDH_MOUSE UDP-glucose 6-dehydrogenase OS=Mus musculus OX=10090 GN=Ugdh PE=1 SV=1	1	1	1	1	1	1	1	0	0	0	1	1	1	0	0	0	1	1	1	0	0	0	2.6	2.6	2.6	54.831	493	493	0	8.1635	By MS/MS	By MS/MS	By MS/MS				2.6	2.6	2.6	0	0	0
O70551	O70551	1	1	1	SRSF protein kinase 1	Srpk1	sp|O70551|SRPK1_MOUSE SRSF protein kinase 1 OS=Mus musculus OX=10090 GN=Srpk1 PE=1 SV=2	1	1	1	1	1	1	1	1	1	1	1	1	1	1	1	1	1	1	1	1	1	1	2.5	2.5	2.5	73.088	648	648	0	7.07	By matching	By matching	By MS/MS	By matching	By matching	By matching	2.5	2.5	2.5	2.5	2.5	2.5
O70591	O70591	1	1	1	Prefoldin subunit 2	Pfdn2	sp|O70591|PFD2_MOUSE Prefoldin subunit 2 OS=Mus musculus OX=10090 GN=Pfdn2 PE=1 SV=2	1	1	1	1	1	1	1	0	1	1	1	1	1	0	1	1	1	1	1	0	1	1	7.1	7.1	7.1	16.534	154	154	0.0033557	6.0546	By matching	By MS/MS	By MS/MS		By matching	By matching	7.1	7.1	7.1	0	7.1	7.1
O88532	O88532	1	1	1	Zinc finger RNA-binding protein	Zfr	sp|O88532|ZFR_MOUSE Zinc finger RNA-binding protein OS=Mus musculus OX=10090 GN=Zfr PE=1 SV=2	1	1	1	1	1	1	1	1	0	1	1	1	1	1	0	1	1	1	1	1	0	1	1.6	1.6	1.6	116.86	1074	1074	0.0044444	6.0337	By matching	By MS/MS	By MS/MS	By matching		By matching	1.6	1.6	1.6	1.6	0	1.6
O88569;A0A0N4SUM2	O88569	10;4	10;4	10;4	Heterogeneous nuclear ribonucleoproteins A2/B1	Hnrnpa2b1	sp|O88569|ROA2_MOUSE Heterogeneous nuclear ribonucleoproteins A2/B1 OS=Mus musculus OX=10090 GN=Hnrnpa2b1 PE=1 SV=2	2	10	10	10	9	10	9	9	9	9	9	10	9	9	9	9	9	10	9	9	9	9	33.4	33.4	33.4	37.402	353	353;155	0	141.58	By MS/MS	By MS/MS	By MS/MS	By MS/MS	By MS/MS	By MS/MS	30.6	33.4	30.6	30.6	30.6	30.6
O88967	O88967	7	7	7	ATP-dependent zinc metalloprotease YME1L1	Yme1l1	sp|O88967|YMEL1_MOUSE ATP-dependent zinc metalloprotease YME1L1 OS=Mus musculus OX=10090 GN=Yme1l1 PE=1 SV=1	1	7	7	7	7	7	7	0	1	2	7	7	7	0	1	2	7	7	7	0	1	2	11.2	11.2	11.2	80.027	715	715	0	55.092	By MS/MS	By MS/MS	By MS/MS		By matching	By matching	11.2	11.2	11.2	0	1.5	3.2
O89086;Q8BG13	O89086;Q8BG13	3;2	3;2	3;2	RNA-binding protein 3	Rbm3	sp|O89086|RBM3_MOUSE RNA-binding protein 3 OS=Mus musculus OX=10090 GN=Rbm3 PE=1 SV=1;tr|Q8BG13|Q8BG13_MOUSE RNA-binding protein 3 OS=Mus musculus OX=10090 GN=Rbm3 PE=1 SV=1	2	3	3	3	1	2	2	3	3	3	1	2	2	3	3	3	1	2	2	3	3	3	22.9	22.9	22.9	16.604	153	153;154	0	19.89	By MS/MS	By MS/MS	By matching	By MS/MS	By MS/MS	By MS/MS	6.5	15.7	15.7	22.9	22.9	22.9
P00405	P00405	1	1	1	Cytochrome c oxidase subunit 2	Mtco2	sp|P00405|COX2_MOUSE Cytochrome c oxidase subunit 2 OS=Mus musculus OX=10090 GN=Mtco2 PE=1 SV=1	1	1	1	1	1	1	1	0	1	1	1	1	1	0	1	1	1	1	1	0	1	1	3.1	3.1	3.1	25.976	227	227	0.0082051	5.8544	By matching	By matching	By MS/MS		By matching	By matching	3.1	3.1	3.1	0	3.1	3.1
P01837	P01837	5	5	5	Ig kappa chain C region		sp|P01837|IGKC_MOUSE Immunoglobulin kappa constant OS=Mus musculus OX=10090 GN=Igkc PE=1 SV=2	1	5	5	5	4	5	3	5	3	4	4	5	3	5	3	4	4	5	3	5	3	4	45.8	45.8	45.8	11.934	107	107	0	65.45	By MS/MS	By MS/MS	By MS/MS	By matching	By MS/MS	By MS/MS	41.1	45.8	33.6	45.8	33.6	41.1
P01868;P01869	P01868;P01869	6;5	1;1	1;1	Ig gamma-1 chain C region secreted form;Ig gamma-1 chain C region, membrane-bound form	Ighg1	sp|P01868|IGHG1_MOUSE Ig gamma-1 chain C region secreted form OS=Mus musculus OX=10090 GN=Ighg1 PE=1 SV=1;sp|P01869|IGH1M_MOUSE Ig gamma-1 chain C region, membrane-bound form OS=Mus musculus OX=10090 GN=Ighg1 PE=1 SV=2	2	6	1	1	5	6	6	5	5	5	1	1	1	1	1	1	1	1	1	1	1	1	17	2.8	2.8	35.704	324	324;393	0	7.9868	By MS/MS	By MS/MS	By MS/MS	By matching	By MS/MS	By MS/MS	14.5	17	17	13.9	14.5	14.5
P01887	P01887	1	1	1	Beta-2-microglobulin	B2m	sp|P01887|B2MG_MOUSE Beta-2-microglobulin OS=Mus musculus OX=10090 GN=B2m PE=1 SV=2	1	1	1	1	1	1	1	1	1	1	1	1	1	1	1	1	1	1	1	1	1	1	7.6	7.6	7.6	13.779	119	119	0	7.3001	By matching	By MS/MS	By MS/MS	By matching	By MS/MS	By matching	7.6	7.6	7.6	7.6	7.6	7.6
P01900;G3UXW2;Q3TH01;P01901;P14428;P01899;P14426;P14427;P03991;L7N260;E9PWT4;E9QJR9;P79568;Q4KN81;P14431;P01895;P14430;P14429;P06339;P01897	P01900;G3UXW2;Q3TH01;P01901;P14428;P01899;P14426;P14427;P03991	4;3;3;3;2;2;2;2;2;1;1;1;1;1;1;1;1;1;1;1	4;3;3;3;2;2;2;2;2;1;1;1;1;1;1;1;1;1;1;1	2;1;1;1;0;0;1;1;0;0;0;0;0;0;0;1;0;0;0;0	H-2 class I histocompatibility antigen, D-D alpha chain;H-2 class I histocompatibility antigen, K-B alpha chain;H-2 class I histocompatibility antigen, K-Q alpha chain;H-2 class I histocompatibility antigen, D-B alpha chain;H-2 class I histocompatibility antigen, D-K alpha chain;H-2 class I histocompatibility antigen, D-P alpha chain;H-2 class I histocompatibility antigen, K-W28 alpha chain	H2-D1;H2-K1	sp|P01900|HA12_MOUSE H-2 class I histocompatibility antigen, D-D alpha chain OS=Mus musculus OX=10090 GN=H2-D1 PE=1 SV=1;tr|G3UXW2|G3UXW2_MOUSE H-2 class I histocompatibility antigen, K-K alpha chain (Fragment) OS=Mus musculus OX=10090 GN=H2-K1 PE=1 SV=1;t	20	4	4	2	4	4	3	2	3	4	4	4	3	2	3	4	2	2	1	1	1	2	9.3	9.3	5.8	41.11	365	365;289;360;369;328;362;362;368;368;215;310;325;326;360;200;298;326;334;357;362	0	32.442	By MS/MS	By MS/MS	By MS/MS	By matching	By MS/MS	By MS/MS	9.3	9.3	5.5	4.4	5.5	9.3
P03975	P03975	6	6	6	IgE-binding protein	Iap	sp|P03975|IGEB_MOUSE IgE-binding protein OS=Mus musculus OX=10090 GN=Iap PE=2 SV=1	1	6	6	6	6	6	6	4	5	6	6	6	6	4	5	6	6	6	6	4	5	6	11.3	11.3	11.3	62.747	557	557	0	85.065	By MS/MS	By MS/MS	By MS/MS	By matching	By MS/MS	By MS/MS	11.3	11.3	11.3	6.6	8.6	11.3
Q8HWB2;P04223	Q8HWB2;P04223	3;3	1;1	1;1	H-2 class I histocompatibility antigen, K-K alpha chain	H2-Q4;H2-K1	tr|Q8HWB2|Q8HWB2_MOUSE Histocompatibility 2, Q region locus 4 OS=Mus musculus OX=10090 GN=H2-Q4 PE=1 SV=1;sp|P04223|HA1K_MOUSE H-2 class I histocompatibility antigen, K-K alpha chain OS=Mus musculus OX=10090 GN=H2-K1 PE=1 SV=1	2	3	1	1	3	3	3	1	3	3	1	1	1	0	1	1	1	1	1	0	1	1	5.6	2	2	39.617	354	354;369	0	6.3086	By matching	By matching	By matching	By matching	By matching	By MS/MS	5.6	5.6	5.6	2.5	5.6	5.6
P68373;P68369;P05213;P05214;A0A2R8VHF3;A0A0A0MQA5;P68368;Q9JJZ2;A0A087WRB4;A0A087WQS4;A0A087WSB0;A0A087WSL5;Q3UX10	P68373;P68369;P05213;P05214;A0A2R8VHF3;A0A0A0MQA5;P68368;Q9JJZ2	8;8;8;6;5;5;5;4;2;2;1;1;1	8;8;8;6;5;5;5;4;2;2;1;1;1	8;8;8;6;5;5;5;4;2;2;1;1;1	Tubulin alpha-1C chain;Tubulin alpha-1A chain;Tubulin alpha-1B chain;Tubulin alpha-3 chain;Tubulin alpha-4A chain;Tubulin alpha-8 chain	Tuba1c;Tuba1a;Tuba1b;Tuba3a;Tuba4a;Tuba8	sp|P68373|TBA1C_MOUSE Tubulin alpha-1C chain OS=Mus musculus OX=10090 GN=Tuba1c PE=1 SV=1;sp|P68369|TBA1A_MOUSE Tubulin alpha-1A chain OS=Mus musculus OX=10090 GN=Tuba1a PE=1 SV=1;sp|P05213|TBA1B_MOUSE Tubulin alpha-1B chain OS=Mus musculus OX=10090 GN=Tub	13	8	8	8	8	8	7	5	6	6	8	8	7	5	6	6	8	8	7	5	6	6	20.7	20.7	20.7	49.909	449	449;451;451;450;267;477;448;449;100;125;81;89;446	0	64.221	By MS/MS	By MS/MS	By MS/MS	By MS/MS	By MS/MS	By MS/MS	20.7	20.7	18.3	13.4	15.1	14.9
P07901;B7ZC50;A2A6A2;B7ZC49	P07901	20;7;3;3	7;2;1;1	7;2;1;1	Heat shock protein HSP 90-alpha	Hsp90aa1	sp|P07901|HS90A_MOUSE Heat shock protein HSP 90-alpha OS=Mus musculus OX=10090 GN=Hsp90aa1 PE=1 SV=4	4	20	7	7	18	19	19	11	16	15	7	7	7	2	5	4	7	7	7	2	5	4	26.6	13	13	84.787	733	733;201;98;103	0	68.439	By MS/MS	By MS/MS	By MS/MS	By MS/MS	By matching	By matching	24.8	25	25	16.8	22.8	21.7
P08113;F7C312	P08113;F7C312	6;4	5;4	5;4	Endoplasmin	Hsp90b1	sp|P08113|ENPL_MOUSE Endoplasmin OS=Mus musculus OX=10090 GN=Hsp90b1 PE=1 SV=2;tr|F7C312|F7C312_MOUSE Endoplasmin (Fragment) OS=Mus musculus OX=10090 GN=Hsp90b1 PE=1 SV=1	2	6	5	5	4	6	6	4	5	5	3	5	5	3	4	4	3	5	5	3	4	4	8.1	6.6	6.6	92.475	802	802;373	0	33.215	By MS/MS	By MS/MS	By MS/MS	By matching	By MS/MS	By MS/MS	5.7	8.1	8.1	5.2	7	7
P08249	P08249	1	1	1	Malate dehydrogenase, mitochondrial	Mdh2	sp|P08249|MDHM_MOUSE Malate dehydrogenase, mitochondrial OS=Mus musculus OX=10090 GN=Mdh2 PE=1 SV=3	1	1	1	1	1	1	1	1	1	1	1	1	1	1	1	1	1	1	1	1	1	1	3	3	3	35.611	338	338	0.0082136	5.8549	By MS/MS	By matching	By matching	By matching	By matching	By matching	3	3	3	3	3	3
P09103;E9Q8G8	P09103	6;2	6;2	6;2	Protein disulfide-isomerase	P4hb	sp|P09103|PDIA1_MOUSE Protein disulfide-isomerase OS=Mus musculus OX=10090 GN=P4hb PE=1 SV=2	2	6	6	6	6	6	6	4	6	6	6	6	6	4	6	6	6	6	6	4	6	6	12.8	12.8	12.8	57.058	509	509;165	0	67.934	By MS/MS	By MS/MS	By MS/MS	By matching	By MS/MS	By matching	12.8	12.8	12.8	7.9	12.8	12.8
P09405;A0A087WRM5	P09405	26;4	26;4	26;4	Nucleolin	Ncl	sp|P09405|NUCL_MOUSE Nucleolin OS=Mus musculus OX=10090 GN=Ncl PE=1 SV=2	2	26	26	26	23	22	25	22	22	24	23	22	25	22	22	24	23	22	25	22	22	24	26.7	26.7	26.7	76.722	707	707;76	0	323.31	By MS/MS	By MS/MS	By MS/MS	By MS/MS	By MS/MS	By MS/MS	26	22.9	26.6	22.9	25	26.4
P09528	P09528	5	5	5	Ferritin heavy chain;Ferritin heavy chain, N-terminally processed	Fth1	sp|P09528|FRIH_MOUSE Ferritin heavy chain OS=Mus musculus OX=10090 GN=Fth1 PE=1 SV=2	1	5	5	5	3	4	2	4	5	4	3	4	2	4	5	4	3	4	2	4	5	4	28.6	28.6	28.6	21.066	182	182	0	44.291	By matching	By MS/MS	By matching	By matching	By MS/MS	By MS/MS	16.5	23.6	10.4	23.6	28.6	23.6
P0DP28;P0DP27;P0DP26;Q3UKW2	P0DP28;P0DP27;P0DP26;Q3UKW2	1;1;1;1	1;1;1;1	1;1;1;1		Calm1	sp|P0DP28|CALM3_MOUSE Calmodulin-3 OS=Mus musculus OX=10090 GN=Calm3 PE=1 SV=1;sp|P0DP27|CALM2_MOUSE Calmodulin-2 OS=Mus musculus OX=10090 GN=Calm2 PE=1 SV=1;sp|P0DP26|CALM1_MOUSE Calmodulin-1 OS=Mus musculus OX=10090 GN=Calm1 PE=1 SV=1;tr|Q3UKW2|Q3UKW2_MO	4	1	1	1	1	1	1	0	1	1	1	1	1	0	1	1	1	1	1	0	1	1	10.7	10.7	10.7	16.837	149	149;149;149;197	0.0073762	5.9108	By matching	By MS/MS	By matching		By matching	By matching	10.7	10.7	10.7	0	10.7	10.7
P10107	P10107	1	1	1	Annexin A1	Anxa1	sp|P10107|ANXA1_MOUSE Annexin A1 OS=Mus musculus OX=10090 GN=Anxa1 PE=1 SV=2	1	1	1	1	0	0	0	0	0	1	0	0	0	0	0	1	0	0	0	0	0	1	3.2	3.2	3.2	38.734	346	346	0.00818	5.8522						By MS/MS	0	0	0	0	0	3.2
P10126;D3Z3I8;D3YZ68;P62631	P10126;D3Z3I8;D3YZ68;P62631	17;12;12;10	17;12;12;10	17;12;12;10	Elongation factor 1-alpha 1;Elongation factor 1-alpha 2	Eef1a1;Eef1a2	sp|P10126|EF1A1_MOUSE Elongation factor 1-alpha 1 OS=Mus musculus OX=10090 GN=Eef1a1 PE=1 SV=3;tr|D3Z3I8|D3Z3I8_MOUSE Elongation factor 1-alpha 1 (Fragment) OS=Mus musculus OX=10090 GN=Eef1a1 PE=1 SV=1;tr|D3YZ68|D3YZ68_MOUSE Elongation factor 1-alpha 1 (Fr	4	17	17	17	16	16	14	11	12	13	16	16	14	11	12	13	16	16	14	11	12	13	40	40	40	50.113	462	462;186;249;463	0	163.32	By MS/MS	By MS/MS	By MS/MS	By MS/MS	By MS/MS	By MS/MS	38.7	38.3	34	28.1	22.3	29.2
P10639	P10639	3	3	3	Thioredoxin	Txn	sp|P10639|THIO_MOUSE Thioredoxin OS=Mus musculus OX=10090 GN=Txn PE=1 SV=3	1	3	3	3	3	3	3	2	3	3	3	3	3	2	3	3	3	3	3	2	3	3	22.9	22.9	22.9	11.675	105	105	0	54.44	By MS/MS	By MS/MS	By MS/MS	By matching	By matching	By matching	22.9	22.9	22.9	10.5	22.9	22.9
P10852;A0A0U1RP98;A0A0U1RPG5;A0A0U1RP32;A0A0U1RPL8;A0A0U1RPK4	P10852;A0A0U1RP98;A0A0U1RPG5;A0A0U1RP32	4;3;2;2;1;1	4;3;2;2;1;1	4;3;2;2;1;1	4F2 cell-surface antigen heavy chain	Slc3a2	sp|P10852|4F2_MOUSE 4F2 cell-surface antigen heavy chain OS=Mus musculus OX=10090 GN=Slc3a2 PE=1 SV=1;tr|A0A0U1RP98|A0A0U1RP98_MOUSE 4F2 cell-surface antigen heavy chain (Fragment) OS=Mus musculus OX=10090 GN=Slc3a2 PE=1 SV=1;tr|A0A0U1RPG5|A0A0U1RPG5_MOUSE	6	4	4	4	4	4	4	4	4	4	4	4	4	4	4	4	4	4	4	4	4	4	6.5	6.5	6.5	58.336	526	526;231;109;113;80;303	0	37.461	By MS/MS	By MS/MS	By MS/MS	By matching	By MS/MS	By MS/MS	6.5	6.5	6.5	6.5	6.5	6.5
Q8CBB6;Q8CGP2;Q8CGP1;Q6ZWY9;Q64525;Q64478;Q64475;P10854;P10853;P70696;Q9D2U9;Q8CGP0;Q64524	Q8CBB6;Q8CGP2;Q8CGP1;Q6ZWY9;Q64525;Q64478;Q64475;P10854;P10853;P70696;Q9D2U9;Q8CGP0;Q64524	4;4;4;4;4;4;4;4;4;3;2;2;2	4;4;4;4;4;4;4;4;4;3;2;2;2	4;4;4;4;4;4;4;4;4;3;2;2;2	Histone H2B;Histone H2B type 1-P;Histone H2B type 1-K;Histone H2B type 1-C/E/G;Histone H2B type 2-B;Histone H2B type 1-H;Histone H2B type 1-B;Histone H2B type 1-M;Histone H2B type 1-F/J/L;Histone H2B type 1-A;Histone H2B type 3-A;Histone H2B type 3-B;Histone H2B type 2-E	Hist1h2br;Hist1h2bp;Hist1h2bk;Hist1h2bc;Hist2h2bb;Hist1h2bh;Hist1h2bb;Hist1h2bm;Hist1h2bf;Hist1h2ba;Hist3h2ba;Hist3h2bb;Hist2h2be	tr|Q8CBB6|Q8CBB6_MOUSE Histone H2B OS=Mus musculus OX=10090 GN=Hist1h2bq PE=2 SV=1;sp|Q8CGP2|H2B1P_MOUSE Histone H2B type 1-P OS=Mus musculus OX=10090 GN=Hist1h2bp PE=1 SV=3;sp|Q8CGP1|H2B1K_MOUSE Histone H2B type 1-K OS=Mus musculus OX=10090 GN=Hist1h2bk P	13	4	4	4	4	3	2	3	3	4	4	3	2	3	3	4	4	3	2	3	3	4	26.9	26.9	26.9	14.888	134	134;126;126;126;126;126;126;126;126;127;126;126;126	0	24.257	By MS/MS	By MS/MS	By MS/MS	By MS/MS	By MS/MS	By MS/MS	26.9	20.1	11.9	20.1	20.1	26.9
P10922	P10922	3	3	3	Histone H1.0;Histone H1.0, N-terminally processed	H1f0	sp|P10922|H10_MOUSE Histone H1.0 OS=Mus musculus OX=10090 GN=H1f0 PE=2 SV=4	1	3	3	3	3	3	3	1	1	3	3	3	3	1	1	3	3	3	3	1	1	3	16.5	16.5	16.5	20.861	194	194	0	25.594	By MS/MS	By MS/MS	By MS/MS	By matching	By matching	By MS/MS	16.5	16.5	16.5	6.7	4.6	16.5
P11499;E9Q3D6;E9Q0C3;E9PX27;D3Z1R1;REV__Q8BL66	P11499	27;7;5;4;3;1	27;7;5;4;3;1	13;2;5;1;0;0	Heat shock protein HSP 90-beta	Hsp90ab1	sp|P11499|HS90B_MOUSE Heat shock protein HSP 90-beta OS=Mus musculus OX=10090 GN=Hsp90ab1 PE=1 SV=3	6	27	27	13	23	25	22	19	23	22	23	25	22	19	23	22	11	12	9	9	11	10	36.6	36.6	21.1	83.28	724	724;189;161;112;76;1411	0	278.55	By MS/MS	By MS/MS	By MS/MS	By MS/MS	By MS/MS	By MS/MS	33.3	33.6	29	28	34.1	30.7
P11983;F2Z483	P11983	13;4	13;4	13;4	T-complex protein 1 subunit alpha	Tcp1	sp|P11983|TCPA_MOUSE T-complex protein 1 subunit alpha OS=Mus musculus OX=10090 GN=Tcp1 PE=1 SV=3	2	13	13	13	10	13	12	8	11	11	10	13	12	8	11	11	10	13	12	8	11	11	26.8	26.8	26.8	60.448	556	556;103	0	99.529	By MS/MS	By MS/MS	By MS/MS	By MS/MS	By MS/MS	By MS/MS	24.5	26.8	26.3	19.6	25	18
P12382	P12382	4	4	1	ATP-dependent 6-phosphofructokinase, liver type	Pfkl	sp|P12382|PFKAL_MOUSE ATP-dependent 6-phosphofructokinase, liver type OS=Mus musculus OX=10090 GN=Pfkl PE=1 SV=4	1	4	4	1	3	4	4	2	2	3	3	4	4	2	2	3	0	1	1	0	0	1	5.8	5.8	1	85.359	780	780	0	29.756	By MS/MS	By MS/MS	By MS/MS	By matching	By matching	By matching	4.7	5.8	5.8	3.6	3.6	4.6
P12970;A0A140T8L3;V9GX35	P12970;A0A140T8L3	10;7;2	10;7;2	10;7;2	60S ribosomal protein L7a	Rpl7a	sp|P12970|RL7A_MOUSE 60S ribosomal protein L7a OS=Mus musculus OX=10090 GN=Rpl7a PE=1 SV=2;tr|A0A140T8L3|A0A140T8L3_MOUSE Uncharacterized protein OS=Mus musculus OX=10090 GN=Rpl7a-ps5 PE=4 SV=1	3	10	10	10	9	10	9	10	10	9	9	10	9	10	10	9	9	10	9	10	10	9	27.8	27.8	27.8	29.976	266	266;268;225	0	64.613	By MS/MS	By MS/MS	By MS/MS	By MS/MS	By MS/MS	By MS/MS	24.1	27.8	24.1	27.8	27.8	24.1
P13020;A0A0J9YUQ8	P13020;A0A0J9YUQ8	3;2	3;2	3;2	Gelsolin	Gsn	sp|P13020|GELS_MOUSE Gelsolin OS=Mus musculus OX=10090 GN=Gsn PE=1 SV=3;tr|A0A0J9YUQ8|A0A0J9YUQ8_MOUSE Gelsolin (Fragment) OS=Mus musculus OX=10090 GN=Gsn PE=1 SV=1	2	3	3	3	3	3	3	0	1	1	3	3	3	0	1	1	3	3	3	0	1	1	4	4	4	85.941	780	780;568	0	27.019	By MS/MS	By MS/MS	By MS/MS		By matching	By matching	4	4	4	0	1.4	1.4
P13541	P13541	1	1	1	Myosin-3	Myh3	sp|P13541|MYH3_MOUSE Myosin-3 OS=Mus musculus OX=10090 GN=Myh3 PE=2 SV=2	1	1	1	1	1	1	1	0	0	0	1	1	1	0	0	0	1	1	1	0	0	0	0.7	0.7	0.7	223.79	1940	1940	0.0011587	6.1586	By matching	By matching	By MS/MS				0.7	0.7	0.7	0	0	0
P14069	P14069	2	2	2	Protein S100-A6	S100a6	sp|P14069|S10A6_MOUSE Protein S100-A6 OS=Mus musculus OX=10090 GN=S100a6 PE=1 SV=3	1	2	2	2	2	2	2	2	2	2	2	2	2	2	2	2	2	2	2	2	2	2	16.9	16.9	16.9	10.051	89	89	0	11.775	By MS/MS	By matching	By MS/MS	By MS/MS	By matching	By matching	16.9	16.9	16.9	16.9	16.9	16.9
P14131	P14131	3	3	3	40S ribosomal protein S16	Rps16	sp|P14131|RS16_MOUSE 40S ribosomal protein S16 OS=Mus musculus OX=10090 GN=Rps16 PE=1 SV=4	1	3	3	3	2	3	2	2	2	2	2	3	2	2	2	2	2	3	2	2	2	2	15.8	15.8	15.8	16.445	146	146	0	17.472	By MS/MS	By MS/MS	By MS/MS	By matching	By MS/MS	By matching	10.3	15.8	10.3	10.3	10.3	10.3
P14148;F6XI62	P14148;F6XI62	8;6	8;6	8;6	60S ribosomal protein L7	Rpl7	sp|P14148|RL7_MOUSE 60S ribosomal protein L7 OS=Mus musculus OX=10090 GN=Rpl7 PE=1 SV=2;tr|F6XI62|F6XI62_MOUSE 60S ribosomal protein L7 (Fragment) OS=Mus musculus OX=10090 GN=Rpl7 PE=1 SV=1	2	8	8	8	5	8	6	6	6	6	5	8	6	6	6	6	5	8	6	6	6	6	20.7	20.7	20.7	31.419	270	270;279	0	73.946	By MS/MS	By MS/MS	By MS/MS	By matching	By MS/MS	By MS/MS	16.7	20.7	17	17	17	17
P14246;E9PXR7	P14246	3;1	3;1	3;1	Solute carrier family 2, facilitated glucose transporter member 2	Slc2a2	sp|P14246|GTR2_MOUSE Solute carrier family 2, facilitated glucose transporter member 2 OS=Mus musculus OX=10090 GN=Slc2a2 PE=1 SV=3	2	3	3	3	1	3	1	1	1	1	1	3	1	1	1	1	1	3	1	1	1	1	5.7	5.7	5.7	57.106	523	523;159	0	18.664	By matching	By MS/MS	By MS/MS	By matching	By matching	By matching	1.7	5.7	1.7	1.7	1.7	1.7
P14685	P14685	1	1	1	26S proteasome non-ATPase regulatory subunit 3	Psmd3	sp|P14685|PSMD3_MOUSE 26S proteasome non-ATPase regulatory subunit 3 OS=Mus musculus OX=10090 GN=Psmd3 PE=1 SV=3	1	1	1	1	1	1	1	0	1	0	1	1	1	0	1	0	1	1	1	0	1	0	1.7	1.7	1.7	60.718	530	530	0.0073375	5.9047	By MS/MS	By MS/MS	By MS/MS		By matching		1.7	1.7	1.7	0	1.7	0
P14733	P14733	2	2	2	Lamin-B1	Lmnb1	sp|P14733|LMNB1_MOUSE Lamin-B1 OS=Mus musculus OX=10090 GN=Lmnb1 PE=1 SV=3	1	2	2	2	2	1	2	2	2	1	2	1	2	2	2	1	2	1	2	2	2	1	3.9	3.9	3.9	66.785	588	588	0	11.098	By matching	By matching	By MS/MS	By matching	By matching	By matching	3.9	2	3.9	3.9	3.9	2
P14873	P14873	26	26	26	Microtubule-associated protein 1B;MAP1B heavy chain;MAP1 light chain LC1	Map1b	sp|P14873|MAP1B_MOUSE Microtubule-associated protein 1B OS=Mus musculus OX=10090 GN=Map1b PE=1 SV=2	1	26	26	26	22	25	24	11	12	19	22	25	24	11	12	19	22	25	24	11	12	19	13	13	13	270.25	2464	2464	0	287.25	By MS/MS	By MS/MS	By MS/MS	By MS/MS	By MS/MS	By MS/MS	11.2	12.5	11.7	5.5	6.4	9.7
P15864;I7HFT9;Q07133	P15864	7;3;3	7;3;3	2;0;0	Histone H1.2	Hist1h1c	sp|P15864|H12_MOUSE Histone H1.2 OS=Mus musculus OX=10090 GN=Hist1h1c PE=1 SV=2	3	7	7	2	7	7	7	6	6	7	7	7	7	6	6	7	2	2	2	1	1	2	31.1	31.1	9.4	21.266	212	212;209;208	0	77.798	By MS/MS	By MS/MS	By MS/MS	By MS/MS	By MS/MS	By MS/MS	31.1	31.1	31.1	29.2	29.2	31.1
P17156	P17156	29	11	10	Heat shock-related 70 kDa protein 2	Hspa2	sp|P17156|HSP72_MOUSE Heat shock-related 70 kDa protein 2 OS=Mus musculus OX=10090 GN=Hspa2 PE=1 SV=2	1	29	11	10	25	28	27	18	24	21	8	11	10	7	6	7	7	10	9	6	5	6	44.5	20.2	19	69.641	633	633	0	90.054	By MS/MS	By MS/MS	By MS/MS	By matching	By MS/MS	By matching	38.7	44.5	42.3	31.9	35.2	34.6
P17182;B1ARR7;Q6PHC1;B0QZL1;A0A0N4SUW8;A0A0N4SUI6;B1ARR6;D3YVD3;D3Z2S4;D3Z6E4;A0A0N4SUX5;P17183	P17182;B1ARR7;Q6PHC1	12;7;7;4;1;1;1;1;1;1;1;1	12;7;7;4;1;1;1;1;1;1;1;1	12;7;7;4;1;1;1;1;1;1;1;1	Alpha-enolase	Eno1	sp|P17182|ENOA_MOUSE Alpha-enolase OS=Mus musculus OX=10090 GN=Eno1 PE=1 SV=3;tr|B1ARR7|B1ARR7_MOUSE Alpha-enolase (Fragment) OS=Mus musculus OX=10090 GN=Eno1 PE=1 SV=1;tr|Q6PHC1|Q6PHC1_MOUSE Alpha-enolase OS=Mus musculus OX=10090 GN=Eno1 PE=1 SV=1	12	12	12	12	11	11	8	5	8	10	11	11	8	5	8	10	11	11	8	5	8	10	22.6	22.6	22.6	47.14	434	434;119;366;221;37;58;67;121;162;315;391;434	0	90.429	By MS/MS	By MS/MS	By MS/MS	By matching	By MS/MS	By MS/MS	21	20.7	14.7	9.7	14.7	19.1
Q61696;P17879	Q61696;P17879	15;15	9;9	6;6	Heat shock 70 kDa protein 1A;Heat shock 70 kDa protein 1B	Hspa1a;Hspa1b	sp|Q61696|HS71A_MOUSE Heat shock 70 kDa protein 1A OS=Mus musculus OX=10090 GN=Hspa1a PE=1 SV=2;sp|P17879|HS71B_MOUSE Heat shock 70 kDa protein 1B OS=Mus musculus OX=10090 GN=Hspa1b PE=1 SV=3	2	15	9	6	15	12	15	9	12	12	9	7	9	5	6	6	6	5	6	2	3	4	21.8	14.4	8.9	70.078	641	641;642	0	80.594	By MS/MS	By MS/MS	By MS/MS	By matching	By MS/MS	By MS/MS	21.8	18.9	21.8	14.8	18.4	18.7
P18155;A0A0N4SVS2;A0A0N4SVW2;D3YZG8	P18155	5;1;1;1	5;1;1;1	5;1;1;1	Bifunctional methylenetetrahydrofolate dehydrogenase/cyclohydrolase, mitochondrial;NAD-dependent methylenetetrahydrofolate dehydrogenase;Methenyltetrahydrofolate cyclohydrolase	Mthfd2	sp|P18155|MTDC_MOUSE Bifunctional methylenetetrahydrofolate dehydrogenase/cyclohydrolase, mitochondrial OS=Mus musculus OX=10090 GN=Mthfd2 PE=1 SV=1	4	5	5	5	5	5	4	3	4	3	5	5	4	3	4	3	5	5	4	3	4	3	10.3	10.3	10.3	37.863	350	350;97;123;338	0	33.828	By MS/MS	By MS/MS	By MS/MS	By matching	By matching	By matching	10.3	10.3	8.3	8	10	8
P19783	P19783	2	2	2	Cytochrome c oxidase subunit 4 isoform 1, mitochondrial	Cox4i1	sp|P19783|COX41_MOUSE Cytochrome c oxidase subunit 4 isoform 1, mitochondrial OS=Mus musculus OX=10090 GN=Cox4i1 PE=1 SV=2	1	2	2	2	1	2	2	0	1	1	1	2	2	0	1	1	1	2	2	0	1	1	7.7	7.7	7.7	19.53	169	169	0	11.854	By matching	By MS/MS	By MS/MS		By matching	By matching	7.1	7.7	7.7	0	7.7	7.7
P20029	P20029	33	30	30	78 kDa glucose-regulated protein	Hspa5	sp|P20029|BIP_MOUSE Endoplasmic reticulum chaperone BiP OS=Mus musculus OX=10090 GN=Hspa5 PE=1 SV=3	1	33	30	30	30	33	30	24	29	30	27	30	27	22	26	27	27	30	27	22	26	27	43.2	39.7	39.7	72.421	655	655	0	323.31	By MS/MS	By MS/MS	By MS/MS	By MS/MS	By MS/MS	By MS/MS	39.1	43.2	40.3	34.2	40.8	38.2
P20152;A0A0A6YWC8;A2AKJ2;P31001;P03995;D3YZ35;E9Q1Y9;CON__Q61726;CON__O43790;CON__Q6NT21;CON__P78385;CON__Q14533;CON__P78386;A0A0R4J036;Q9ERE2;P97861;Q6IMF0;P46660;Q9Z2T6;P08551;P08553;P19246	P20152;A0A0A6YWC8	24;23;7;5;2;1;1;1;1;1;1;1;1;1;1;1;1;1;1;1;1;1	23;22;6;5;1;1;0;0;0;0;0;0;0;1;0;0;0;1;0;1;1;1	20;19;6;3;1;1;0;0;0;0;0;0;0;1;0;0;0;1;0;1;1;1	Vimentin	Vim	sp|P20152|VIME_MOUSE Vimentin OS=Mus musculus OX=10090 GN=Vim PE=1 SV=3;tr|A0A0A6YWC8|A0A0A6YWC8_MOUSE Vimentin OS=Mus musculus OX=10090 GN=Vim PE=1 SV=1	22	24	23	20	21	23	21	16	20	21	20	22	20	15	19	20	17	19	17	15	17	18	44.6	43.1	39.1	53.687	466	466;427;134;469;430;470;479;479;486;493;493;505;507;848;481;486;495;501;507;543;848;1090	0	176.94	By MS/MS	By MS/MS	By MS/MS	By MS/MS	By MS/MS	By MS/MS	36.7	43.1	37.1	29.8	36.5	38.4
P21126	P21126	1	1	1	Ubiquitin-like protein 4A	Ubl4a	sp|P21126|UBL4A_MOUSE Ubiquitin-like protein 4A OS=Mus musculus OX=10090 GN=Ubl4a PE=1 SV=1	1	1	1	1	1	0	1	0	0	0	1	0	1	0	0	0	1	0	1	0	0	0	7	7	7	17.8	157	157	0.003413	6.1032	By MS/MS		By MS/MS				7	0	7	0	0	0
P21995	P21995	2	2	2	Embigin	Emb	sp|P21995|EMB_MOUSE Embigin OS=Mus musculus OX=10090 GN=Emb PE=1 SV=2	1	2	2	2	2	2	2	0	1	1	2	2	2	0	1	1	2	2	2	0	1	1	7	7	7	37.064	330	330	0	17.68	By MS/MS	By MS/MS	By MS/MS		By MS/MS	By matching	7	7	7	0	3.9	3
P23116	P23116	2	2	2	Eukaryotic translation initiation factor 3 subunit A	Eif3a	sp|P23116|EIF3A_MOUSE Eukaryotic translation initiation factor 3 subunit A OS=Mus musculus OX=10090 GN=Eif3a PE=1 SV=5	1	2	2	2	1	2	2	0	0	1	1	2	2	0	0	1	1	2	2	0	0	1	1.3	1.3	1.3	161.93	1344	1344	0	11.456	By matching	By MS/MS	By MS/MS			By matching	0.6	1.3	1.3	0	0	0.6
P24270	P24270	1	1	1	Catalase	Cat	sp|P24270|CATA_MOUSE Catalase OS=Mus musculus OX=10090 GN=Cat PE=1 SV=4	1	1	1	1	0	1	0	1	1	1	0	1	0	1	1	1	0	1	0	1	1	1	2.5	2.5	2.5	59.795	527	527	0.0044593	6.0504		By matching		By matching	By MS/MS	By MS/MS	0	2.5	0	2.5	2.5	2.5
P25206	P25206	6	6	6	DNA replication licensing factor MCM3	Mcm3	sp|P25206|MCM3_MOUSE DNA replication licensing factor MCM3 OS=Mus musculus OX=10090 GN=Mcm3 PE=1 SV=2	1	6	6	6	5	5	5	0	3	3	5	5	5	0	3	3	5	5	5	0	3	3	10.6	10.6	10.6	91.545	812	812	0	41.513	By MS/MS	By MS/MS	By MS/MS		By matching	By MS/MS	7.4	8.1	9.2	0	3.6	4.4
P25444;D3YVC1;D3YWJ3;D3Z536	P25444;D3YVC1;D3YWJ3	6;5;5;2	6;5;5;2	6;5;5;2	40S ribosomal protein S2	Rps2	sp|P25444|RS2_MOUSE 40S ribosomal protein S2 OS=Mus musculus OX=10090 GN=Rps2 PE=1 SV=3;tr|D3YVC1|D3YVC1_MOUSE 40S ribosomal protein S2 (Fragment) OS=Mus musculus OX=10090 GN=Rps2 PE=1 SV=1;tr|D3YWJ3|D3YWJ3_MOUSE 40S ribosomal protein S2 OS=Mus musculus OX	4	6	6	6	6	5	5	5	4	4	6	5	5	5	4	4	6	5	5	5	4	4	27	27	27	31.231	293	293;269;302;292	0	48.508	By MS/MS	By MS/MS	By MS/MS	By MS/MS	By MS/MS	By MS/MS	27	23.9	24.2	19.8	16.7	13.3
P26231;E0CXB9;Q61301	P26231;E0CXB9;Q61301	2;1;1	2;1;1	2;1;1	Catenin alpha-1;Catenin alpha-2	Ctnna1;Ctnna2	sp|P26231|CTNA1_MOUSE Catenin alpha-1 OS=Mus musculus OX=10090 GN=Ctnna1 PE=1 SV=1;tr|E0CXB9|E0CXB9_MOUSE Catenin alpha-2 OS=Mus musculus OX=10090 GN=Ctnna2 PE=1 SV=1;sp|Q61301|CTNA2_MOUSE Catenin alpha-2 OS=Mus musculus OX=10090 GN=Ctnna2 PE=1 SV=3	3	2	2	2	2	2	2	0	0	0	2	2	2	0	0	0	2	2	2	0	0	0	3.3	3.3	3.3	100.11	906	906;966;953	0	12.652	By matching	By MS/MS	By MS/MS				3.3	3.3	3.3	0	0	0
P26350;A0A087WP98;A0A087WPN6;A0A087WQN2	P26350;A0A087WP98;A0A087WPN6;A0A087WQN2	2;1;1;1	2;1;1;1	2;1;1;1	Prothymosin alpha;Prothymosin alpha, N-terminally processed;Thymosin alpha	Ptma	sp|P26350|PTMA_MOUSE Prothymosin alpha OS=Mus musculus OX=10090 GN=Ptma PE=1 SV=2;tr|A0A087WP98|A0A087WP98_MOUSE Prothymosin alpha OS=Mus musculus OX=10090 GN=Ptma PE=1 SV=1;tr|A0A087WPN6|A0A087WPN6_MOUSE Prothymosin alpha OS=Mus musculus OX=10090 GN=Ptma	4	2	2	2	2	1	2	1	1	0	2	1	2	1	1	0	2	1	2	1	1	0	25.2	25.2	25.2	12.254	111	111;58;98;145	0	21.424	By MS/MS	By MS/MS	By MS/MS	By matching	By MS/MS		25.2	12.6	25.2	12.6	12.6	0
P26443	P26443	2	2	2	Glutamate dehydrogenase 1, mitochondrial	Glud1	sp|P26443|DHE3_MOUSE Glutamate dehydrogenase 1, mitochondrial OS=Mus musculus OX=10090 GN=Glud1 PE=1 SV=1	1	2	2	2	2	2	2	0	0	0	2	2	2	0	0	0	2	2	2	0	0	0	3.4	3.4	3.4	61.336	558	558	0	12.171	By MS/MS	By MS/MS	By MS/MS				3.4	3.4	3.4	0	0	0
P26645	P26645	2	2	2	Myristoylated alanine-rich C-kinase substrate	Marcks	sp|P26645|MARCS_MOUSE Myristoylated alanine-rich C-kinase substrate OS=Mus musculus OX=10090 GN=Marcks PE=1 SV=2	1	2	2	2	2	2	2	1	0	1	2	2	2	1	0	1	2	2	2	1	0	1	11	11	11	29.661	309	309	0	11.37	By matching	By MS/MS	By MS/MS	By matching		By matching	11	11	11	6.1	0	6.1
P27601;Q9D034;A0A0G2JG40;O70443;P27600	P27601;Q9D034	3;2;1;1;1	3;2;1;1;1	2;2;0;0;0	Guanine nucleotide-binding protein subunit alpha-13	Gna13	sp|P27601|GNA13_MOUSE Guanine nucleotide-binding protein subunit alpha-13 OS=Mus musculus OX=10090 GN=Gna13 PE=1 SV=1;tr|Q9D034|Q9D034_MOUSE Guanine nucleotide-binding protein subunit alpha-13 OS=Mus musculus OX=10090 GN=Gna13 PE=1 SV=1	5	3	3	2	2	3	3	0	1	2	2	3	3	0	1	2	1	2	2	0	1	1	8	8	5.8	44.054	377	377;173;316;355;379	0	17.506	By matching	By MS/MS	By MS/MS		By matching	By matching	4.8	8	8	0	2.7	4.8
P27612;F7D1R5	P27612;F7D1R5	2;1	2;1	2;1	Phospholipase A-2-activating protein	Plaa	sp|P27612|PLAP_MOUSE Phospholipase A-2-activating protein OS=Mus musculus OX=10090 GN=Plaa PE=1 SV=4;tr|F7D1R5|F7D1R5_MOUSE Phospholipase A-2-activating protein (Fragment) OS=Mus musculus OX=10090 GN=Plaa PE=1 SV=1	2	2	2	2	2	2	2	0	2	2	2	2	2	0	2	2	2	2	2	0	2	2	3.4	3.4	3.4	87.22	794	794;214	0	11.975	By matching	By matching	By MS/MS		By matching	By matching	3.4	3.4	3.4	0	3.4	3.4
P27659;A0A2R8VHN4;A0A087WNS0;A0A087WQK0	P27659;A0A2R8VHN4	9;5;1;1	9;5;1;1	9;5;1;1	60S ribosomal protein L3	Rpl3	sp|P27659|RL3_MOUSE 60S ribosomal protein L3 OS=Mus musculus OX=10090 GN=Rpl3 PE=1 SV=3;tr|A0A2R8VHN4|A0A2R8VHN4_MOUSE 60S ribosomal protein L3 (Fragment) OS=Mus musculus OX=10090 GN=Rpl3 PE=1 SV=1	4	9	9	9	6	7	7	8	7	7	6	7	7	8	7	7	6	7	7	8	7	7	17.1	17.1	17.1	46.109	403	403;134;180;188	0	61.758	By MS/MS	By MS/MS	By MS/MS	By MS/MS	By MS/MS	By MS/MS	13.2	15.1	13.2	16.9	15.1	13.2
P27773	P27773	1	1	1	Protein disulfide-isomerase A3	Pdia3	sp|P27773|PDIA3_MOUSE Protein disulfide-isomerase A3 OS=Mus musculus OX=10090 GN=Pdia3 PE=1 SV=2	1	1	1	1	1	1	1	1	1	1	1	1	1	1	1	1	1	1	1	1	1	1	2.6	2.6	2.6	56.678	505	505	0.0053305	5.9355	By MS/MS	By matching	By matching	By matching	By matching	By matching	2.6	2.6	2.6	2.6	2.6	2.6
P28667	P28667	1	1	1	MARCKS-related protein	Marcksl1	sp|P28667|MRP_MOUSE MARCKS-related protein OS=Mus musculus OX=10090 GN=Marcksl1 PE=1 SV=2	1	1	1	1	1	1	1	1	1	1	1	1	1	1	1	1	1	1	1	1	1	1	7.5	7.5	7.5	20.165	200	200	0.008222	5.8559	By MS/MS	By matching	By matching	By matching	By matching	By matching	7.5	7.5	7.5	7.5	7.5	7.5
P29341;Q9D4E6;Q62029;A2A5N3;F6ZAX1;A0A2I3BR37	P29341	12;5;4;3;1;1	12;5;4;3;1;1	10;4;3;2;1;1	Polyadenylate-binding protein 1	Pabpc1	sp|P29341|PABP1_MOUSE Polyadenylate-binding protein 1 OS=Mus musculus OX=10090 GN=Pabpc1 PE=1 SV=2	6	12	12	10	12	12	12	10	9	11	12	12	12	10	9	11	10	10	10	8	7	9	17	17	14.5	70.67	636	636;643;628;607;118;126	0	80.95	By MS/MS	By MS/MS	By MS/MS	By MS/MS	By MS/MS	By MS/MS	17	17	17	13.2	11.6	14.9
Q9CPX4;P29391;A0A1B0GRH4;A0A1B0GR60;P49945;A0A1Y7VNT9	Q9CPX4;P29391;A0A1B0GRH4;A0A1B0GR60;P49945	5;5;3;3;3;1	5;5;3;3;3;1	5;5;3;3;3;1	Ferritin;Ferritin light chain 1;Ferritin light chain 2	Ftl1;Ftl2	tr|Q9CPX4|Q9CPX4_MOUSE Ferritin OS=Mus musculus OX=10090 GN=Ftl1 PE=1 SV=1;sp|P29391|FRIL1_MOUSE Ferritin light chain 1 OS=Mus musculus OX=10090 GN=Ftl1 PE=1 SV=2;tr|A0A1B0GRH4|A0A1B0GRH4_MOUSE Ferritin OS=Mus musculus OX=10090 GN=Ftl1 PE=1 SV=1;tr|A0A1B0G	6	5	5	5	5	4	3	4	4	5	5	4	3	4	4	5	5	4	3	4	4	5	27.3	27.3	27.3	20.772	183	183;183;84;160;183;30	0	46.486	By MS/MS	By MS/MS	By MS/MS	By MS/MS	By MS/MS	By MS/MS	27.3	23.5	18.6	23.5	22.4	27.3
P31230;Q3UZG4;A0A0G2JDH0;A0A0G2JEU9;A0A0G2JDV0;A0A0G2JDW6	P31230;Q3UZG4	3;2;1;1;1;1	3;2;1;1;1;1	3;2;1;1;1;1	Aminoacyl tRNA synthase complex-interacting multifunctional protein 1;Endothelial monocyte-activating polypeptide 2	Aimp1	sp|P31230|AIMP1_MOUSE Aminoacyl tRNA synthase complex-interacting multifunctional protein 1 OS=Mus musculus OX=10090 GN=Aimp1 PE=1 SV=2;tr|Q3UZG4|Q3UZG4_MOUSE Aminoacyl tRNA synthase complex-interacting multifunctional protein 1 OS=Mus musculus OX=10090 GN	6	3	3	3	3	3	3	3	2	1	3	3	3	3	2	1	3	3	3	3	2	1	11.6	11.6	11.6	33.997	310	310;319;55;80;85;115	0	24.135	By MS/MS	By MS/MS	By MS/MS	By matching	By MS/MS	By matching	11.6	11.6	11.6	11.6	8.7	3.2
P32067;F6SXM5;D6RI87;A2AR07	P32067;F6SXM5	3;2;1;1	3;2;1;1	3;2;1;1	Lupus La protein homolog	Ssb	sp|P32067|LA_MOUSE Lupus La protein homolog OS=Mus musculus OX=10090 GN=Ssb PE=1 SV=1;tr|F6SXM5|F6SXM5_MOUSE Lupus La protein homolog (Fragment) OS=Mus musculus OX=10090 GN=Ssb PE=1 SV=1	4	3	3	3	3	3	3	2	3	3	3	3	3	2	3	3	3	3	3	2	3	3	7	7	7	47.756	415	415;230;159;184	0	19.313	By MS/MS	By MS/MS	By MS/MS	By matching	By MS/MS	By MS/MS	7	7	7	5.1	7	7
P32233	P32233	2	2	2	Developmentally-regulated GTP-binding protein 1	Drg1	sp|P32233|DRG1_MOUSE Developmentally-regulated GTP-binding protein 1 OS=Mus musculus OX=10090 GN=Drg1 PE=1 SV=1	1	2	2	2	2	1	2	2	2	2	2	1	2	2	2	2	2	1	2	2	2	2	6.8	6.8	6.8	40.512	367	367	0	12.823	By MS/MS	By matching	By MS/MS	By matching	By matching	By matching	6.8	2.7	6.8	6.8	6.8	6.8
P32921	P32921	1	1	1	Tryptophan--tRNA ligase, cytoplasmic;T1-TrpRS;T2-TrpRS	Wars	sp|P32921|SYWC_MOUSE Tryptophan--tRNA ligase, cytoplasmic OS=Mus musculus OX=10090 GN=Wars PE=1 SV=2	1	1	1	1	1	1	1	0	0	0	1	1	1	0	0	0	1	1	1	0	0	0	3.5	3.5	3.5	54.357	481	481	0	6.4493	By matching	By MS/MS	By matching				3.5	3.5	3.5	0	0	0
P33215	P33215	1	1	1	Protein NEDD1	Nedd1	sp|P33215|NEDD1_MOUSE Protein NEDD1 OS=Mus musculus OX=10090 GN=Nedd1 PE=1 SV=2	1	1	1	1	1	0	1	0	0	0	1	0	1	0	0	0	1	0	1	0	0	0	2	2	2	71.292	660	660	0.007384	5.9116	By matching		By MS/MS				2	0	2	0	0	0
P34884	P34884	1	1	1	Macrophage migration inhibitory factor	Mif	sp|P34884|MIF_MOUSE Macrophage migration inhibitory factor OS=Mus musculus OX=10090 GN=Mif PE=1 SV=2	1	1	1	1	0	0	0	0	1	1	0	0	0	0	1	1	0	0	0	0	1	1	9.6	9.6	9.6	12.504	115	115	0	6.5341					By MS/MS	By MS/MS	0	0	0	0	9.6	9.6
Q8C266;P35278	Q8C266;P35278	2;2	2;2	2;2	Ras-related protein Rab-5C	Rab5c	tr|Q8C266|Q8C266_MOUSE Ras-related protein Rab-5C OS=Mus musculus OX=10090 GN=Rab5c PE=1 SV=1;sp|P35278|RAB5C_MOUSE Ras-related protein Rab-5C OS=Mus musculus OX=10090 GN=Rab5c PE=1 SV=2	2	2	2	2	2	2	2	1	1	1	2	2	2	1	1	1	2	2	2	1	1	1	10.3	10.3	10.3	25.352	234	234;216	0	19.09	By MS/MS	By MS/MS	By MS/MS	By matching	By matching	By matching	10.3	10.3	10.3	5.1	5.1	5.1
P35293	P35293	2	2	2	Ras-related protein Rab-18	Rab18	sp|P35293|RAB18_MOUSE Ras-related protein Rab-18 OS=Mus musculus OX=10090 GN=Rab18 PE=1 SV=2	1	2	2	2	2	2	2	0	1	1	2	2	2	0	1	1	2	2	2	0	1	1	9.2	9.2	9.2	23.035	206	206	0	11.517	By MS/MS	By MS/MS	By matching		By matching	By matching	9.2	9.2	9.2	0	3.9	3.9
P35550;A0A140LIR6	P35550;A0A140LIR6	5;4	4;4	4;4	rRNA 2-O-methyltransferase fibrillarin	Fbl	sp|P35550|FBRL_MOUSE rRNA 2-O-methyltransferase fibrillarin OS=Mus musculus OX=10090 GN=Fbl PE=1 SV=2;tr|A0A140LIR6|A0A140LIR6_MOUSE rRNA 2-O-methyltransferase fibrillarin (Fragment) OS=Mus musculus OX=10090 GN=Fbl PE=1 SV=1	2	5	4	4	3	5	4	4	5	4	3	4	4	3	4	4	3	4	4	3	4	4	13.1	10.7	10.7	34.306	327	327;85	0	32.035	By MS/MS	By MS/MS	By MS/MS	By matching	By matching	By matching	10.7	13.1	10.7	9.2	13.1	10.7
P35564	P35564	7	7	7	Calnexin	Canx	sp|P35564|CALX_MOUSE Calnexin OS=Mus musculus OX=10090 GN=Canx PE=1 SV=1	1	7	7	7	6	6	7	4	6	6	6	6	7	4	6	6	6	6	7	4	6	6	11	11	11	67.277	591	591	0	43.958	By MS/MS	By MS/MS	By MS/MS	By MS/MS	By MS/MS	By MS/MS	9.3	9.3	11	6.4	9.6	9.6
P35700;B1AXW5;B1AXW6;B1AXW4	P35700;B1AXW5;B1AXW6	9;8;8;4	9;8;8;4	8;7;7;4	Peroxiredoxin-1	Prdx1	sp|P35700|PRDX1_MOUSE Peroxiredoxin-1 OS=Mus musculus OX=10090 GN=Prdx1 PE=1 SV=1;tr|B1AXW5|B1AXW5_MOUSE Peroxiredoxin-1 (Fragment) OS=Mus musculus OX=10090 GN=Prdx1 PE=1 SV=8;tr|B1AXW6|B1AXW6_MOUSE Peroxiredoxin-1 (Fragment) OS=Mus musculus OX=10090 GN=Pr	4	9	9	8	9	6	7	6	8	9	9	6	7	6	8	9	8	6	7	6	7	8	39.2	39.2	35.2	22.176	199	199;169;176;123	0	63.2	By MS/MS	By MS/MS	By MS/MS	By matching	By MS/MS	By MS/MS	39.2	28.1	31.7	27.1	35.2	39.2
P35979	P35979	1	1	1	60S ribosomal protein L12	Rpl12	sp|P35979|RL12_MOUSE 60S ribosomal protein L12 OS=Mus musculus OX=10090 GN=Rpl12 PE=1 SV=2	1	1	1	1	1	1	1	1	1	1	1	1	1	1	1	1	1	1	1	1	1	1	5.5	5.5	5.5	17.804	165	165	0.0053879	5.9714	By matching	By MS/MS	By MS/MS	By matching	By matching	By MS/MS	5.5	5.5	5.5	5.5	5.5	5.5
P38647	P38647	32	32	32	Stress-70 protein, mitochondrial	Hspa9	sp|P38647|GRP75_MOUSE Stress-70 protein, mitochondrial OS=Mus musculus OX=10090 GN=Hspa9 PE=1 SV=3	1	32	32	32	30	31	30	21	29	29	30	31	30	21	29	29	30	31	30	21	29	29	36.5	36.5	36.5	73.46	679	679	0	323.31	By MS/MS	By MS/MS	By MS/MS	By MS/MS	By MS/MS	By MS/MS	34.6	34.8	36.2	25.9	36.5	34.8
P41105;F6Z0X0	P41105	6;2	6;2	6;2	60S ribosomal protein L28	Rpl28	sp|P41105|RL28_MOUSE 60S ribosomal protein L28 OS=Mus musculus OX=10090 GN=Rpl28 PE=1 SV=2	2	6	6	6	5	6	6	6	6	6	5	6	6	6	6	6	5	6	6	6	6	6	35	35	35	15.733	137	137;85	0	50.292	By MS/MS	By MS/MS	By MS/MS	By MS/MS	By MS/MS	By MS/MS	29.2	35	35	35	35	35
P42125	P42125	1	1	1	Enoyl-CoA delta isomerase 1, mitochondrial	Eci1	sp|P42125|ECI1_MOUSE Enoyl-CoA delta isomerase 1, mitochondrial OS=Mus musculus OX=10090 GN=Eci1 PE=1 SV=2	1	1	1	1	1	1	1	0	1	1	1	1	1	0	1	1	1	1	1	0	1	1	5.2	5.2	5.2	32.25	289	289	0	6.601	By matching	By MS/MS	By matching		By matching	By matching	5.2	5.2	5.2	0	5.2	5.2
P42669	P42669	1	1	1	Transcriptional activator protein Pur-alpha	Pura	sp|P42669|PURA_MOUSE Transcriptional activator protein Pur-alpha OS=Mus musculus OX=10090 GN=Pura PE=1 SV=1	1	1	1	1	1	1	1	1	1	1	1	1	1	1	1	1	1	1	1	1	1	1	3.1	3.1	3.1	34.883	321	321	0	7.1658	By matching	By MS/MS	By MS/MS	By matching	By MS/MS	By matching	3.1	3.1	3.1	3.1	3.1	3.1
P43274	P43274	6	2	2	Histone H1.4	Hist1h1e	sp|P43274|H14_MOUSE Histone H1.4 OS=Mus musculus OX=10090 GN=Hist1h1e PE=1 SV=2	1	6	2	2	6	6	6	6	6	6	2	2	2	2	2	2	2	2	2	2	2	2	24.7	9.1	9.1	21.977	219	219	0	39.984	By MS/MS	By MS/MS	By MS/MS	By matching	By MS/MS	By MS/MS	24.7	24.7	24.7	24.7	24.7	24.7
P43275	P43275	5	4	4	Histone H1.1	Hist1h1a	sp|P43275|H11_MOUSE Histone H1.1 OS=Mus musculus OX=10090 GN=Hist1h1a PE=1 SV=2	1	5	4	4	5	5	5	5	1	3	4	4	4	4	0	2	4	4	4	4	0	2	22.1	17.4	17.4	21.785	213	213	0	42.864	By MS/MS	By MS/MS	By MS/MS	By matching	By matching	By MS/MS	22.1	22.1	22.1	22.1	4.7	19.7
P43276	P43276	5	4	4	Histone H1.5	Hist1h1b	sp|P43276|H15_MOUSE Histone H1.5 OS=Mus musculus OX=10090 GN=Hist1h1b PE=1 SV=2	1	5	4	4	5	5	4	4	4	4	4	4	3	3	3	3	4	4	3	3	3	3	23.3	19.3	19.3	22.576	223	223	0	47.966	By MS/MS	By MS/MS	By MS/MS	By MS/MS	By MS/MS	By MS/MS	23.3	23.3	23.3	17.9	23.3	16.1
P43277	P43277	6	1	1	Histone H1.3	Hist1h1d	sp|P43277|H13_MOUSE Histone H1.3 OS=Mus musculus OX=10090 GN=Hist1h1d PE=1 SV=2	1	6	1	1	6	6	6	6	6	6	1	1	1	1	1	1	1	1	1	1	1	1	28.1	7.2	7.2	22.099	221	221	0	8.4498	By MS/MS	By MS/MS	By MS/MS	By matching	By MS/MS	By MS/MS	28.1	28.1	28.1	28.1	28.1	28.1
P46414	P46414	1	1	1	Cyclin-dependent kinase inhibitor 1B	Cdkn1b	sp|P46414|CDN1B_MOUSE Cyclin-dependent kinase inhibitor 1B OS=Mus musculus OX=10090 GN=Cdkn1b PE=1 SV=2	1	1	1	1	1	1	1	0	0	1	1	1	1	0	0	1	1	1	1	0	0	1	6.6	6.6	6.6	22.193	197	197	0	7.0021	By MS/MS	By MS/MS	By MS/MS			By matching	6.6	6.6	6.6	0	0	6.6
P46471;Q8BVQ9	P46471;Q8BVQ9	3;2	3;2	3;2	26S protease regulatory subunit 7	Psmc2	sp|P46471|PRS7_MOUSE 26S proteasome regulatory subunit 7 OS=Mus musculus OX=10090 GN=Psmc2 PE=1 SV=5;tr|Q8BVQ9|Q8BVQ9_MOUSE 26S proteasome regulatory subunit 7 OS=Mus musculus OX=10090 GN=Psmc2 PE=1 SV=1	2	3	3	3	3	3	3	2	3	3	3	3	3	2	3	3	3	3	3	2	3	3	7.4	7.4	7.4	48.647	433	433;475	0	26.856	By MS/MS	By MS/MS	By MS/MS	By matching	By matching	By MS/MS	7.4	7.4	7.4	5.1	7.4	7.4
P47738;A0A0G2JEU1;A0A0G2JF60;A0A0G2JFQ0;G3UWP3;P24549;O35945;Q9JHW9;Q62148;Q9CZS1	P47738;A0A0G2JEU1	5;4;1;1;1;1;1;1;1;1	5;4;1;1;1;1;1;1;1;1	5;4;1;1;1;1;1;1;1;1	Aldehyde dehydrogenase, mitochondrial	Aldh2	sp|P47738|ALDH2_MOUSE Aldehyde dehydrogenase, mitochondrial OS=Mus musculus OX=10090 GN=Aldh2 PE=1 SV=1;tr|A0A0G2JEU1|A0A0G2JEU1_MOUSE Aldehyde dehydrogenase, mitochondrial OS=Mus musculus OX=10090 GN=Aldh2 PE=1 SV=1	10	5	5	5	5	5	5	2	4	4	5	5	5	2	4	4	5	5	5	2	4	4	7.7	7.7	7.7	56.537	519	519;471;196;229;277;501;501;512;518;519	0	37.487	By MS/MS	By MS/MS	By MS/MS	By matching	By MS/MS	By MS/MS	7.7	7.7	7.7	3.5	6	7.5
P47857	P47857	3	1	1	ATP-dependent 6-phosphofructokinase, muscle type	Pfkm	sp|P47857|PFKAM_MOUSE ATP-dependent 6-phosphofructokinase, muscle type OS=Mus musculus OX=10090 GN=Pfkm PE=1 SV=3	1	3	1	1	3	3	3	1	1	1	1	1	1	0	0	0	1	1	1	0	0	0	3.3	1	1	85.268	780	780	0.0053937	5.9738	By MS/MS	By MS/MS	By MS/MS	By matching	By matching	By matching	3.3	3.3	3.3	1.2	1.2	1.2
P47911	P47911	12	12	12	60S ribosomal protein L6	Rpl6	sp|P47911|RL6_MOUSE 60S ribosomal protein L6 OS=Mus musculus OX=10090 GN=Rpl6 PE=1 SV=3	1	12	12	12	10	10	12	10	11	10	10	10	12	10	11	10	10	10	12	10	11	10	30.1	30.1	30.1	33.509	296	296	0	99.146	By MS/MS	By MS/MS	By MS/MS	By MS/MS	By MS/MS	By MS/MS	26.4	25.7	30.1	27	26.4	26
P47962;D3YYV8	P47962;D3YYV8	11;6	11;6	11;6	60S ribosomal protein L5	Rpl5	sp|P47962|RL5_MOUSE 60S ribosomal protein L5 OS=Mus musculus OX=10090 GN=Rpl5 PE=1 SV=3;tr|D3YYV8|D3YYV8_MOUSE 60S ribosomal protein L5 (Fragment) OS=Mus musculus OX=10090 GN=Rpl5 PE=1 SV=1	2	11	11	11	8	11	10	8	9	9	8	11	10	8	9	9	8	11	10	8	9	9	26.6	26.6	26.6	34.4	297	297;163	0	90.669	By MS/MS	By MS/MS	By MS/MS	By MS/MS	By MS/MS	By MS/MS	21.9	26.6	26.3	21.5	21.9	21.5
P47963	P47963	12	12	12	60S ribosomal protein L13	Rpl13	sp|P47963|RL13_MOUSE 60S ribosomal protein L13 OS=Mus musculus OX=10090 GN=Rpl13 PE=1 SV=3	1	12	12	12	10	12	9	8	11	11	10	12	9	8	11	11	10	12	9	8	11	11	41.7	41.7	41.7	24.305	211	211	0	257.37	By MS/MS	By MS/MS	By MS/MS	By MS/MS	By MS/MS	By MS/MS	35.1	41.7	29.9	26.1	41.2	41.2
Q6ZWZ4;P47964	Q6ZWZ4;P47964	1;1	1;1	1;1	60S ribosomal protein L36	Rpl36	tr|Q6ZWZ4|Q6ZWZ4_MOUSE 60S ribosomal protein L36 OS=Mus musculus OX=10090 GN=Rpl36 PE=1 SV=1;sp|P47964|RL36_MOUSE 60S ribosomal protein L36 OS=Mus musculus OX=10090 GN=Rpl36 PE=1 SV=2	2	1	1	1	1	1	1	1	1	1	1	1	1	1	1	1	1	1	1	1	1	1	8.6	8.6	8.6	12.254	105	105;105	0.0044199	6.0185	By MS/MS	By MS/MS	By MS/MS	By matching	By matching	By MS/MS	8.6	8.6	8.6	8.6	8.6	8.6
P48678;D3YUF7	P48678;D3YUF7	5;3	5;3	5;3	Prelamin-A/C;Lamin-A/C	Lmna	sp|P48678|LMNA_MOUSE Prelamin-A/C OS=Mus musculus OX=10090 GN=Lmna PE=1 SV=2;tr|D3YUF7|D3YUF7_MOUSE Prelamin-A/C (Fragment) OS=Mus musculus OX=10090 GN=Lmna PE=1 SV=1	2	5	5	5	3	5	4	3	4	3	3	5	4	3	4	3	3	5	4	3	4	3	9.2	9.2	9.2	74.237	665	665;117	0	30.232	By MS/MS	By MS/MS	By MS/MS	By matching	By matching	By matching	5.1	9.2	7.5	5.3	6.6	5.1
P48722;E0CY23;A0A0N4SW76;A0A0N4SVU2	P48722	12;5;2;1	11;5;2;1	11;5;2;1	Heat shock 70 kDa protein 4L	Hspa4l	sp|P48722|HS74L_MOUSE Heat shock 70 kDa protein 4L OS=Mus musculus OX=10090 GN=Hspa4l PE=1 SV=2	4	12	11	11	11	11	11	7	9	11	10	10	10	7	8	10	10	10	10	7	8	10	14.3	13.2	13.2	94.381	838	838;571;125;158	0	71.691	By MS/MS	By MS/MS	By MS/MS	By matching	By matching	By MS/MS	12.6	12.6	12.6	7.3	9.7	12.6
P48771	P48771	1	1	1	Cytochrome c oxidase subunit 7A2, mitochondrial	Cox7a2	sp|P48771|CX7A2_MOUSE Cytochrome c oxidase subunit 7A2, mitochondrial OS=Mus musculus OX=10090 GN=Cox7a2 PE=1 SV=2	1	1	1	1	0	1	1	0	1	1	0	1	1	0	1	1	0	1	1	0	1	1	12	12	12	9.2908	83	83	0.0082474	5.8602		By MS/MS	By matching		By matching	By matching	0	12	12	0	12	12
Q5EBP8;P49312	Q5EBP8;P49312	9;9	9;9	8;8	Heterogeneous nuclear ribonucleoprotein A1;Heterogeneous nuclear ribonucleoprotein A1, N-terminally processed	Hnrnpa1	tr|Q5EBP8|Q5EBP8_MOUSE Heterogeneous nuclear ribonucleoprotein A1 OS=Mus musculus OX=10090 GN=Hnrnpa1 PE=1 SV=1;sp|P49312|ROA1_MOUSE Heterogeneous nuclear ribonucleoprotein A1 OS=Mus musculus OX=10090 GN=Hnrnpa1 PE=1 SV=2	2	9	9	8	6	8	7	7	8	8	6	8	7	7	8	8	5	8	6	7	8	8	23.1	23.1	21.2	38.833	373	373;320	0	96.255	By MS/MS	By MS/MS	By MS/MS	By MS/MS	By MS/MS	By MS/MS	16.6	21.2	16.9	18.5	21.2	21.2
Q52KC3;P49718	Q52KC3;P49718	1;1	1;1	1;1	DNA helicase;DNA replication licensing factor MCM5	Mcm5	tr|Q52KC3|Q52KC3_MOUSE DNA helicase OS=Mus musculus OX=10090 GN=Mcm5 PE=1 SV=1;sp|P49718|MCM5_MOUSE DNA replication licensing factor MCM5 OS=Mus musculus OX=10090 GN=Mcm5 PE=1 SV=1	2	1	1	1	1	1	1	0	0	1	1	1	1	0	0	1	1	1	1	0	0	1	1.2	1.2	1.2	82.406	734	734;733	0.0074231	5.9198	By MS/MS	By matching	By MS/MS			By matching	1.2	1.2	1.2	0	0	1.2
Q3U3J1;P50136	Q3U3J1;P50136	1;1	1;1	1;1	2-oxoisovalerate dehydrogenase subunit alpha, mitochondrial	Bckdha	tr|Q3U3J1|Q3U3J1_MOUSE 2-oxoisovalerate dehydrogenase subunit alpha OS=Mus musculus OX=10090 GN=Bckdha PE=1 SV=1;sp|P50136|ODBA_MOUSE 2-oxoisovalerate dehydrogenase subunit alpha, mitochondrial OS=Mus musculus OX=10090 GN=Bckdha PE=1 SV=1	2	1	1	1	0	1	1	0	0	0	0	1	1	0	0	0	0	1	1	0	0	0	2.2	2.2	2.2	50.773	446	446;442	0	7.0035		By MS/MS	By MS/MS				0	2.2	2.2	0	0	0
P51881;P48962;Q3V132	P51881;P48962	9;6;2	9;6;2	9;6;2	ADP/ATP translocase 2;ADP/ATP translocase 2, N-terminally processed;ADP/ATP translocase 1	Slc25a5;Slc25a4	sp|P51881|ADT2_MOUSE ADP/ATP translocase 2 OS=Mus musculus OX=10090 GN=Slc25a5 PE=1 SV=3;sp|P48962|ADT1_MOUSE ADP/ATP translocase 1 OS=Mus musculus OX=10090 GN=Slc25a4 PE=1 SV=4	3	9	9	9	8	9	8	4	6	5	8	9	8	4	6	5	8	9	8	4	6	5	24.8	24.8	24.8	32.931	298	298;298;320	0	55.538	By MS/MS	By MS/MS	By MS/MS	By matching	By MS/MS	By MS/MS	21.5	24.8	21.5	11.4	16.4	14.8
P51944	P51944	8	8	8	Cyclin-F	Ccnf	sp|P51944|CCNF_MOUSE Cyclin-F OS=Mus musculus OX=10090 GN=Ccnf PE=2 SV=2	1	8	8	8	6	8	7	4	3	2	6	8	7	4	3	2	6	8	7	4	3	2	5.7	5.7	5.7	86.622	777	777	0	117.36	By MS/MS	By MS/MS	By MS/MS	By MS/MS	By matching	By matching	5.1	5.7	5.3	3.6	2.6	2.6
P52293;A2A600;A2A601;F2Z431;A2A602;A6PW68	P52293;A2A600;A2A601	3;2;2;1;1;1	3;2;2;1;1;1	3;2;2;1;1;1	Importin subunit alpha-1	Kpna2	sp|P52293|IMA1_MOUSE Importin subunit alpha-1 OS=Mus musculus OX=10090 GN=Kpna2 PE=1 SV=2;tr|A2A600|A2A600_MOUSE Importin subunit alpha-1 (Fragment) OS=Mus musculus OX=10090 GN=Kpna2 PE=1 SV=2;tr|A2A601|A2A601_MOUSE Importin subunit alpha-1 (Fragment) OS=M	6	3	3	3	2	3	3	1	1	2	2	3	3	1	1	2	2	3	3	1	1	2	8.5	8.5	8.5	57.927	529	529;163;170;75;80;189	0	41.124	By MS/MS	By MS/MS	By MS/MS	By matching	By matching	By matching	5.1	8.5	8.5	2.3	2.8	5.1
P52480;A0A1L1SUV0;A0A1L1SSN6;A0A1L1STV8;A0A1L1SQV8;A0A1L1SU37;A0A1L1SVH2;A0A1L1ST52;E9Q509;G3X925;P53657	P52480	5;2;2;2;2;2;1;1;1;1;1	5;2;2;2;2;2;1;1;1;1;1	5;2;2;2;2;2;1;1;1;1;1	Pyruvate kinase PKM	Pkm	sp|P52480|KPYM_MOUSE Pyruvate kinase PKM OS=Mus musculus OX=10090 GN=Pkm PE=1 SV=4	11	5	5	5	5	4	3	3	4	3	5	4	3	3	4	3	5	4	3	3	4	3	9.4	9.4	9.4	57.844	531	531;155;176;184;187;232;51;102;543;574;574	0	32.693	By MS/MS	By MS/MS	By MS/MS	By matching	By MS/MS	By MS/MS	9.4	7.7	5.6	5.6	7.7	6.2
Q3UJH4;P52651;V9GXJ4	Q3UJH4;P52651;V9GXJ4	9;9;8	9;9;8	9;9;8	Homeobox protein Rhox5	Rhox5	tr|Q3UJH4|Q3UJH4_MOUSE Homeobox protein Rhox5 OS=Mus musculus OX=10090 GN=Rhox5 PE=1 SV=1;sp|P52651|RHOX5_MOUSE Homeobox protein Rhox5 OS=Mus musculus OX=10090 GN=Rhox5 PE=2 SV=1;tr|V9GXJ4|V9GXJ4_MOUSE Homeobox protein Rhox5 (Fragment) OS=Mus musculus OX=1	3	9	9	9	6	8	7	0	1	2	6	8	7	0	1	2	6	8	7	0	1	2	50	50	50	23.058	210	210;210;213	0	112.8	By MS/MS	By MS/MS	By MS/MS		By matching	By matching	36.2	50	37.6	0	3.8	7.6
Q5XJF6;P53026;D6RE43	Q5XJF6;P53026;D6RE43	4;4;3	4;4;3	4;4;3	Ribosomal protein;60S ribosomal protein L10a	Rpl10a	tr|Q5XJF6|Q5XJF6_MOUSE Ribosomal protein OS=Mus musculus OX=10090 GN=Rpl10a PE=1 SV=1;sp|P53026|RL10A_MOUSE 60S ribosomal protein L10a OS=Mus musculus OX=10090 GN=Rpl10a PE=1 SV=3;tr|D6RE43|D6RE43_MOUSE 60S ribosomal protein L10a OS=Mus musculus OX=10090 G	3	4	4	4	2	3	3	1	3	2	2	3	3	1	3	2	2	3	3	1	3	2	12.4	12.4	12.4	24.831	217	217;217;58	0	25.043	By MS/MS	By MS/MS	By MS/MS	By matching	By MS/MS	By MS/MS	7.4	8.8	11.1	3.7	11.1	7.4
P53986	P53986	1	1	1	Monocarboxylate transporter 1	Slc16a1	sp|P53986|MOT1_MOUSE Monocarboxylate transporter 1 OS=Mus musculus OX=10090 GN=Slc16a1 PE=1 SV=1	1	1	1	1	1	1	1	1	1	1	1	1	1	1	1	1	1	1	1	1	1	1	2.6	2.6	2.6	53.267	493	493	0	14.059	By MS/MS	By MS/MS	By MS/MS	By matching	By MS/MS	By MS/MS	2.6	2.6	2.6	2.6	2.6	2.6
P53994	P53994	1	1	1	Ras-related protein Rab-2A	Rab2a	sp|P53994|RAB2A_MOUSE Ras-related protein Rab-2A OS=Mus musculus OX=10090 GN=Rab2a PE=1 SV=1	1	1	1	1	1	1	1	0	0	0	1	1	1	0	0	0	1	1	1	0	0	0	6.6	6.6	6.6	23.547	212	212	0	6.3644	By matching	By matching	By MS/MS				6.6	6.6	6.6	0	0	0
P54116	P54116	2	2	2	Erythrocyte band 7 integral membrane protein	Stom	sp|P54116|STOM_MOUSE Erythrocyte band 7 integral membrane protein OS=Mus musculus OX=10090 GN=Stom PE=1 SV=3	1	2	2	2	2	2	2	1	1	1	2	2	2	1	1	1	2	2	2	1	1	1	7.7	7.7	7.7	31.375	284	284	0	15.214	By MS/MS	By MS/MS	By MS/MS	By matching	By matching	By matching	7.7	7.7	7.7	4.2	4.2	4.2
P54818	P54818	1	1	1	Galactocerebrosidase	Galc	sp|P54818|GALC_MOUSE Galactocerebrosidase OS=Mus musculus OX=10090 GN=Galc PE=1 SV=2	1	1	1	1	1	1	1	0	1	1	1	1	1	0	1	1	1	1	1	0	1	1	2.3	2.3	2.3	77.256	684	684	0	11.585	By MS/MS	By MS/MS	By MS/MS		By MS/MS	By MS/MS	2.3	2.3	2.3	0	2.3	2.3
P56480	P56480	8	8	8	ATP synthase subunit beta, mitochondrial	Atp5b	sp|P56480|ATPB_MOUSE ATP synthase subunit beta, mitochondrial OS=Mus musculus OX=10090 GN=Atp5f1b PE=1 SV=2	1	8	8	8	6	7	7	3	6	5	6	7	7	3	6	5	6	7	7	3	6	5	16.6	16.6	16.6	56.3	529	529	0	64.313	By MS/MS	By MS/MS	By MS/MS	By matching	By MS/MS	By MS/MS	13	14.6	15.9	6.2	13	10
Q8K366;P56960	Q8K366;P56960	1;1	1;1	1;1	Exosome component 10	Exosc10	tr|Q8K366|Q8K366_MOUSE Exosc10 protein OS=Mus musculus OX=10090 GN=Exosc10 PE=1 SV=1;sp|P56960|EXOSX_MOUSE Exosome component 10 OS=Mus musculus OX=10090 GN=Exosc10 PE=1 SV=2	2	1	1	1	1	1	1	0	0	1	1	1	1	0	0	1	1	1	1	0	0	1	0.9	0.9	0.9	98.115	862	862;887	1	-2	By matching	By matching	By MS/MS			By matching	0.9	0.9	0.9	0	0	0.9
P57722;G3UYM5;A0A2R8VHN3;A0A2R8W6L5;E9Q7D8;A0A2R8VI71;A0A2R8VHY9;A0A2R8VI12;A0A2R8VHI3;A0A087WR61;A0A087WSI1;A0A1L1SUS5;A0A1L1SRP9;A0A2R8VHG2;A0A2R8VKF0;A0A1L1SQ99;A0A2R8VI15;A0A087WRH3;A0A2R8VJY1;A0A2R8VHL8;A0A2R8VHZ0;A0A2R8VKN0;A0A2R8VI73;A0A0R4J044;P57724	P57722;G3UYM5;A0A2R8VHN3;A0A2R8W6L5;E9Q7D8;A0A2R8VI71;A0A2R8VHY9;A0A2R8VI12	4;2;2;2;2;2;2;2;1;1;1;1;1;1;1;1;1;1;1;1;1;1;1;1;1	1;1;0;0;0;0;0;0;0;0;0;0;0;0;0;0;0;0;0;0;0;0;0;0;0	1;1;0;0;0;0;0;0;0;0;0;0;0;0;0;0;0;0;0;0;0;0;0;0;0	Poly(rC)-binding protein 3	Pcbp3	sp|P57722|PCBP3_MOUSE Poly(rC)-binding protein 3 OS=Mus musculus OX=10090 GN=Pcbp3 PE=1 SV=3;tr|G3UYM5|G3UYM5_MOUSE Poly(rC)-binding protein 3 (Fragment) OS=Mus musculus OX=10090 GN=Pcbp3 PE=1 SV=1;tr|A0A2R8VHN3|A0A2R8VHN3_MOUSE Poly(rC)-binding protein 2	25	4	1	1	4	4	4	3	4	4	1	1	1	1	1	1	1	1	1	1	1	1	12.7	3	3	39.294	371	371;161;168;224;226;241;249;280;96;113;119;149;158;186;190;190;192;197;205;225;231;253;264;403;403	0	9.1527	By MS/MS	By matching	By MS/MS	By matching	By MS/MS	By MS/MS	12.7	12.7	12.7	7.3	12.7	12.7
P57784	P57784	3	3	3	U2 small nuclear ribonucleoprotein A	Snrpa1	sp|P57784|RU2A_MOUSE U2 small nuclear ribonucleoprotein A OS=Mus musculus OX=10090 GN=Snrpa1 PE=1 SV=2	1	3	3	3	3	2	3	1	3	3	3	2	3	1	3	3	3	2	3	1	3	3	14.9	14.9	14.9	28.357	255	255	0	17.122	By matching	By matching	By MS/MS	By matching	By matching	By MS/MS	14.9	10.2	14.9	4.7	14.9	14.9
P57787	P57787	1	1	1	Monocarboxylate transporter 4	Slc16a3	sp|P57787|MOT4_MOUSE Monocarboxylate transporter 4 OS=Mus musculus OX=10090 GN=Slc16a3 PE=1 SV=1	1	1	1	1	1	1	1	1	0	1	1	1	1	1	0	1	1	1	1	1	0	1	2.6	2.6	2.6	50.373	470	470	0	12.054	By MS/MS	By MS/MS	By MS/MS	By matching		By matching	2.6	2.6	2.6	2.6	0	2.6
P58252	P58252	14	14	14	Elongation factor 2	Eef2	sp|P58252|EF2_MOUSE Elongation factor 2 OS=Mus musculus OX=10090 GN=Eef2 PE=1 SV=2	1	14	14	14	13	13	13	9	12	11	13	13	13	9	12	11	13	13	13	9	12	11	20.4	20.4	20.4	95.313	858	858	0	112.37	By MS/MS	By MS/MS	By MS/MS	By MS/MS	By MS/MS	By MS/MS	19	19.3	19.3	15.3	16.2	13.3
P60122;D3YW60	P60122	6;1	6;1	6;1	RuvB-like 1	Ruvbl1	sp|P60122|RUVB1_MOUSE RuvB-like 1 OS=Mus musculus OX=10090 GN=Ruvbl1 PE=1 SV=1	2	6	6	6	5	6	6	2	4	4	5	6	6	2	4	4	5	6	6	2	4	4	12.5	12.5	12.5	50.213	456	456;134	0	48.749	By MS/MS	By MS/MS	By MS/MS	By matching	By matching	By matching	10.3	12.5	12.5	4.6	9.6	9.6
P60229	P60229	1	1	1	Eukaryotic translation initiation factor 3 subunit E	Eif3e	sp|P60229|EIF3E_MOUSE Eukaryotic translation initiation factor 3 subunit E OS=Mus musculus OX=10090 GN=Eif3e PE=1 SV=1	1	1	1	1	1	1	1	1	1	1	1	1	1	1	1	1	1	1	1	1	1	1	2.5	2.5	2.5	52.22	445	445	0	8.0957	By MS/MS	By MS/MS	By MS/MS	By matching	By matching	By matching	2.5	2.5	2.5	2.5	2.5	2.5
P60335	P60335	5	5	2	Poly(rC)-binding protein 1	Pcbp1	sp|P60335|PCBP1_MOUSE Poly(rC)-binding protein 1 OS=Mus musculus OX=10090 GN=Pcbp1 PE=1 SV=1	1	5	5	2	5	5	5	4	5	5	5	5	5	4	5	5	2	2	2	2	2	2	15.7	15.7	5.6	37.497	356	356	0	40.006	By MS/MS	By MS/MS	By MS/MS	By matching	By MS/MS	By MS/MS	15.7	15.7	15.7	10.1	15.7	15.7
P63260;P60710;P63268;P68134;P68033;P62737;E9Q5F4;E9Q1F2;G3UZ07;E9Q606;B1ATY1;G3UYG0;D3Z2K3;D3YZY0;A0A1D5RM20;E9Q2D1;Q8BFZ3;F6WX90;F8WGM8;V9GXQ2;A0A0U1RQ96;E9Q3M9	P63260;P60710;P63268;P68134;P68033;P62737;E9Q5F4;E9Q1F2;G3UZ07;E9Q606;B1ATY1	16;16;12;12;12;12;11;11;10;8;8;7;7;7;6;5;5;3;3;2;2;1	16;16;12;12;12;12;11;11;10;8;8;7;7;7;6;5;5;3;3;2;2;1	16;16;12;12;12;12;11;11;10;8;8;7;7;7;6;5;5;3;3;2;2;1	Actin, cytoplasmic 2;Actin, cytoplasmic 2, N-terminally processed;Actin, cytoplasmic 1;Actin, cytoplasmic 1, N-terminally processed;Actin, gamma-enteric smooth muscle;Actin, alpha skeletal muscle;Actin, alpha cardiac muscle 1;Actin, aortic smooth muscle	Actg1;Actb;Actg2;Acta1;Actc1;Acta2	sp|P63260|ACTG_MOUSE Actin, cytoplasmic 2 OS=Mus musculus OX=10090 GN=Actg1 PE=1 SV=1;sp|P60710|ACTB_MOUSE Actin, cytoplasmic 1 OS=Mus musculus OX=10090 GN=Actb PE=1 SV=1;sp|P63268|ACTH_MOUSE Actin, gamma-enteric smooth muscle OS=Mus musculus OX=10090 GN=A	22	16	16	16	15	16	15	14	16	15	15	16	15	14	16	15	15	16	15	14	16	15	42.7	42.7	42.7	41.792	375	375;375;376;377;377;377;265;295;268;150;153;132;195;221;151;108;376;43;105;156;195;1175	0	224.4	By MS/MS	By MS/MS	By MS/MS	By MS/MS	By MS/MS	By MS/MS	41.9	42.7	41.9	40.5	42.7	42.7
P60843	P60843	1	1	1	Eukaryotic initiation factor 4A-I	Eif4a1	sp|P60843|IF4A1_MOUSE Eukaryotic initiation factor 4A-I OS=Mus musculus OX=10090 GN=Eif4a1 PE=1 SV=1	1	1	1	1	1	1	1	1	1	1	1	1	1	1	1	1	1	1	1	1	1	1	4.2	4.2	4.2	46.153	406	406	0	6.8896	By MS/MS	By MS/MS	By matching	By MS/MS	By MS/MS	By matching	4.2	4.2	4.2	4.2	4.2	4.2
P60867	P60867	2	2	2	40S ribosomal protein S20	Rps20	sp|P60867|RS20_MOUSE 40S ribosomal protein S20 OS=Mus musculus OX=10090 GN=Rps20 PE=1 SV=1	1	2	2	2	1	2	0	0	1	0	1	2	0	0	1	0	1	2	0	0	1	0	22.7	22.7	22.7	13.373	119	119	0	12.929	By matching	By MS/MS			By matching		10.1	22.7	0	0	10.1	0
P61021	P61021	1	1	1	Ras-related protein Rab-5B	Rab5b	sp|P61021|RAB5B_MOUSE Ras-related protein Rab-5B OS=Mus musculus OX=10090 GN=Rab5b PE=1 SV=1	1	1	1	1	1	1	1	0	0	1	1	1	1	0	0	1	1	1	1	0	0	1	5.6	5.6	5.6	23.707	215	215	0.0081967	5.8542	By matching	By matching	By MS/MS			By matching	5.6	5.6	5.6	0	0	5.6
P61027	P61027	1	1	1	Ras-related protein Rab-10	Rab10	sp|P61027|RAB10_MOUSE Ras-related protein Rab-10 OS=Mus musculus OX=10090 GN=Rab10 PE=1 SV=1	1	1	1	1	1	1	1	0	0	0	1	1	1	0	0	0	1	1	1	0	0	0	6	6	6	22.541	200	200	0.003386	6.0838	By MS/MS	By MS/MS	By MS/MS				6	6	6	0	0	0
P61222	P61222	1	1	1	ATP-binding cassette sub-family E member 1	Abce1	sp|P61222|ABCE1_MOUSE ATP-binding cassette sub-family E member 1 OS=Mus musculus OX=10090 GN=Abce1 PE=1 SV=1	1	1	1	1	1	0	0	0	0	0	1	0	0	0	0	0	1	0	0	0	0	0	2	2	2	67.314	599	599	0	7.3955	By MS/MS						2	0	0	0	0	0
P61255;B1ARA3;B1ARA5	P61255;B1ARA3;B1ARA5	7;5;5	7;5;5	7;5;5	60S ribosomal protein L26	Rpl26	sp|P61255|RL26_MOUSE 60S ribosomal protein L26 OS=Mus musculus OX=10090 GN=Rpl26 PE=1 SV=1;tr|B1ARA3|B1ARA3_MOUSE 60S ribosomal protein L26 (Fragment) OS=Mus musculus OX=10090 GN=Rpl26 PE=1 SV=1;tr|B1ARA5|B1ARA5_MOUSE 60S ribosomal protein L26 OS=Mus muscu	3	7	7	7	5	7	5	5	6	4	5	7	5	5	6	4	5	7	5	5	6	4	34.5	34.5	34.5	17.258	145	145;103;143	0	58.713	By MS/MS	By MS/MS	By MS/MS	By MS/MS	By MS/MS	By MS/MS	29.7	34.5	29.7	29.7	31	23.4
P61358;A2A4Q0	P61358	4;1	4;1	4;1	60S ribosomal protein L27	Rpl27	sp|P61358|RL27_MOUSE 60S ribosomal protein L27 OS=Mus musculus OX=10090 GN=Rpl27 PE=1 SV=2	2	4	4	4	4	3	3	3	3	2	4	3	3	3	3	2	4	3	3	3	3	2	26.5	26.5	26.5	15.798	136	136;87	0	25.814	By MS/MS	By MS/MS	By MS/MS	By matching	By MS/MS	By MS/MS	26.5	20.6	20.6	20.6	20.6	12.5
P61514	P61514	3	3	3	60S ribosomal protein L37a	Rpl37a	sp|P61514|RL37A_MOUSE 60S ribosomal protein L37a OS=Mus musculus OX=10090 GN=Rpl37a PE=1 SV=2	1	3	3	3	2	2	2	3	2	2	2	2	2	3	2	2	2	2	2	3	2	2	37	37	37	10.275	92	92	0	21.695	By MS/MS	By MS/MS	By MS/MS	By matching	By MS/MS	By matching	27.2	27.2	27.2	37	17.4	17.4
P61620;Q9CYJ6;Q9JLR1;A0A0A6YVQ7;A2ATT9	P61620;Q9CYJ6;Q9JLR1	4;2;2;1;1	4;2;2;1;1	4;2;2;1;1	Protein transport protein Sec61 subunit alpha isoform 1;Protein transport protein Sec61 subunit alpha isoform 2	Sec61a1;Sec61a2	sp|P61620|S61A1_MOUSE Protein transport protein Sec61 subunit alpha isoform 1 OS=Mus musculus OX=10090 GN=Sec61a1 PE=1 SV=2;tr|Q9CYJ6|Q9CYJ6_MOUSE Protein transport protein Sec61 subunit alpha isoform 2 OS=Mus musculus OX=10090 GN=Sec61a2 PE=1 SV=1;sp|Q9JL	5	4	4	4	3	4	2	2	1	3	3	4	2	2	1	3	3	4	2	2	1	3	8.4	8.4	8.4	52.264	476	476;410;476;120;175	0	23.275	By MS/MS	By MS/MS	By MS/MS	By matching	By matching	By matching	6.3	8.4	4.4	4	2.1	6.3
P61965	P61965	1	1	1	WD repeat-containing protein 5	Wdr5	sp|P61965|WDR5_MOUSE WD repeat-containing protein 5 OS=Mus musculus OX=10090 GN=Wdr5 PE=1 SV=1	1	1	1	1	1	1	1	1	1	1	1	1	1	1	1	1	1	1	1	1	1	1	3.9	3.9	3.9	36.588	334	334	0	14.865	By matching	By MS/MS	By matching	By matching	By MS/MS	By MS/MS	3.9	3.9	3.9	3.9	3.9	3.9
P61982;F6WA09	P61982	7;1	7;1	4;0	14-3-3 protein gamma;14-3-3 protein gamma, N-terminally processed	Ywhag	sp|P61982|1433G_MOUSE 14-3-3 protein gamma OS=Mus musculus OX=10090 GN=Ywhag PE=1 SV=2	2	7	7	4	6	5	7	4	6	5	6	5	7	4	6	5	3	2	4	2	3	3	27.1	27.1	17.4	28.302	247	247;154	0	43.204	By MS/MS	By MS/MS	By MS/MS	By matching	By MS/MS	By MS/MS	23.5	17.8	27.1	14.2	21.5	19.8
P62192	P62192	6	6	6	26S protease regulatory subunit 4	Psmc1	sp|P62192|PRS4_MOUSE 26S proteasome regulatory subunit 4 OS=Mus musculus OX=10090 GN=Psmc1 PE=1 SV=1	1	6	6	6	4	5	5	0	3	2	4	5	5	0	3	2	4	5	5	0	3	2	13	13	13	49.184	440	440	0	43.146	By MS/MS	By MS/MS	By MS/MS		By matching	By MS/MS	9.1	10.9	11.1	0	7	4.5
Q8K1K2;P62196	Q8K1K2;P62196	2;2	2;2	2;2	26S protease regulatory subunit 8	Psmc5	tr|Q8K1K2|Q8K1K2_MOUSE 26S proteasome regulatory subunit 8 OS=Mus musculus OX=10090 GN=Psmc5 PE=1 SV=1;sp|P62196|PRS8_MOUSE 26S proteasome regulatory subunit 8 OS=Mus musculus OX=10090 GN=Psmc5 PE=1 SV=1	2	2	2	2	2	2	2	0	2	1	2	2	2	0	2	1	2	2	2	0	2	1	7.2	7.2	7.2	38.751	348	348;406	0	22.092	By MS/MS	By MS/MS	By MS/MS		By MS/MS	By MS/MS	7.2	7.2	7.2	0	7.2	3.7
P62242	P62242	8	8	8	40S ribosomal protein S8	Rps8	sp|P62242|RS8_MOUSE 40S ribosomal protein S8 OS=Mus musculus OX=10090 GN=Rps8 PE=1 SV=2	1	8	8	8	6	8	6	5	7	7	6	8	6	5	7	7	6	8	6	5	7	7	29.8	29.8	29.8	24.205	208	208	0	100.98	By MS/MS	By MS/MS	By MS/MS	By MS/MS	By MS/MS	By MS/MS	28.8	29.8	28.8	21.6	29.3	29.3
P62264;D3YVF4;D3Z7I1	P62264	6;2;2	6;2;2	6;2;2	40S ribosomal protein S14	Rps14	sp|P62264|RS14_MOUSE 40S ribosomal protein S14 OS=Mus musculus OX=10090 GN=Rps14 PE=1 SV=3	3	6	6	6	5	6	5	5	4	4	5	6	5	5	4	4	5	6	5	5	4	4	19.9	19.9	19.9	16.273	151	151;119;138	0	112.43	By MS/MS	By MS/MS	By MS/MS	By matching	By MS/MS	By MS/MS	19.9	19.9	19.9	19.9	19.9	19.9
P62267	P62267	5	5	5	40S ribosomal protein S23	Rps23	sp|P62267|RS23_MOUSE 40S ribosomal protein S23 OS=Mus musculus OX=10090 GN=Rps23 PE=1 SV=3	1	5	5	5	4	5	4	4	4	4	4	5	4	4	4	4	4	5	4	4	4	4	40.6	40.6	40.6	15.807	143	143	0	40.404	By MS/MS	By MS/MS	By MS/MS	By matching	By MS/MS	By MS/MS	39.9	40.6	39.9	39.9	39.9	39.9
Q921R2;P62301;A0A0U1RQ71	Q921R2;P62301;A0A0U1RQ71	4;4;3	4;4;3	4;4;3	40S ribosomal protein S13	Rps13	tr|Q921R2|Q921R2_MOUSE 40S ribosomal protein S13 OS=Mus musculus OX=10090 GN=Rps13 PE=1 SV=1;sp|P62301|RS13_MOUSE 40S ribosomal protein S13 OS=Mus musculus OX=10090 GN=Rps13 PE=1 SV=2;tr|A0A0U1RQ71|A0A0U1RQ71_MOUSE 40S ribosomal protein S13 OS=Mus musculus	3	4	4	4	4	4	4	4	3	4	4	4	4	4	3	4	4	4	4	4	3	4	22.9	22.9	22.9	16.142	140	140;151;53	0	38.418	By MS/MS	By MS/MS	By MS/MS	By MS/MS	By MS/MS	By MS/MS	22.9	22.9	22.9	22.9	22.9	22.9
P62307	P62307	1	1	1	Small nuclear ribonucleoprotein F	Snrpf	sp|P62307|RUXF_MOUSE Small nuclear ribonucleoprotein F OS=Mus musculus OX=10090 GN=Snrpf PE=1 SV=1	1	1	1	1	1	1	1	1	1	1	1	1	1	1	1	1	1	1	1	1	1	1	15.1	15.1	15.1	9.7251	86	86	0	9.5445	By MS/MS	By MS/MS	By MS/MS	By matching	By MS/MS	By MS/MS	15.1	15.1	15.1	15.1	15.1	15.1
P62317	P62317	2	2	2	Small nuclear ribonucleoprotein Sm D2	Snrpd2	sp|P62317|SMD2_MOUSE Small nuclear ribonucleoprotein Sm D2 OS=Mus musculus OX=10090 GN=Snrpd2 PE=1 SV=1	1	2	2	2	2	2	1	1	1	1	2	2	1	1	1	1	2	2	1	1	1	1	14.4	14.4	14.4	13.527	118	118	0	13.532	By MS/MS	By MS/MS	By MS/MS	By matching	By matching	By MS/MS	14.4	14.4	8.5	8.5	8.5	8.5
P62320	P62320	1	1	1	Small nuclear ribonucleoprotein Sm D3	Snrpd3	sp|P62320|SMD3_MOUSE Small nuclear ribonucleoprotein Sm D3 OS=Mus musculus OX=10090 GN=Snrpd3 PE=1 SV=1	1	1	1	1	1	1	1	1	1	1	1	1	1	1	1	1	1	1	1	1	1	1	7.9	7.9	7.9	13.916	126	126	0	9.3222	By matching	By MS/MS	By MS/MS	By matching	By matching	By MS/MS	7.9	7.9	7.9	7.9	7.9	7.9
P62334	P62334	2	2	2	26S protease regulatory subunit 10B	Psmc6	sp|P62334|PRS10_MOUSE 26S proteasome regulatory subunit 10B OS=Mus musculus OX=10090 GN=Psmc6 PE=1 SV=1	1	2	2	2	2	2	2	0	1	2	2	2	2	0	1	2	2	2	2	0	1	2	5.1	5.1	5.1	44.172	389	389	0	15.099	By MS/MS	By MS/MS	By MS/MS		By matching	By MS/MS	5.1	5.1	5.1	0	2.8	5.1
P62627	P62627	1	1	1	Dynein light chain roadblock-type 1	Dynlrb1	sp|P62627|DLRB1_MOUSE Dynein light chain roadblock-type 1 OS=Mus musculus OX=10090 GN=Dynlrb1 PE=1 SV=3	1	1	1	1	1	1	1	1	1	1	1	1	1	1	1	1	1	1	1	1	1	1	9.4	9.4	9.4	10.99	96	96	0	7.7319	By MS/MS	By MS/MS	By matching	By matching	By matching	By matching	9.4	9.4	9.4	9.4	9.4	9.4
P62702;V9GWY0	P62702;V9GWY0	5;3	5;3	5;3	40S ribosomal protein S4, X isoform;40S ribosomal protein S4	Rps4x;Gm15013	sp|P62702|RS4X_MOUSE 40S ribosomal protein S4, X isoform OS=Mus musculus OX=10090 GN=Rps4x PE=1 SV=2;tr|V9GWY0|V9GWY0_MOUSE 40S ribosomal protein S4 OS=Mus musculus OX=10090 GN=Gm15013 PE=3 SV=1	2	5	5	5	3	5	3	2	4	2	3	5	3	2	4	2	3	5	3	2	4	2	13.7	13.7	13.7	29.597	263	263;266	0	33.2	By MS/MS	By MS/MS	By MS/MS	By matching	By MS/MS	By MS/MS	9.9	13.7	9.1	5.3	12.5	6.5
P62751	P62751	4	4	4	60S ribosomal protein L23a	Rpl23a	sp|P62751|RL23A_MOUSE 60S ribosomal protein L23a OS=Mus musculus OX=10090 GN=Rpl23a PE=1 SV=1	1	4	4	4	4	4	3	4	4	4	4	4	3	4	4	4	4	4	3	4	4	4	23.1	23.1	23.1	17.695	156	156	0	32.521	By MS/MS	By MS/MS	By MS/MS	By MS/MS	By MS/MS	By matching	23.1	23.1	14.7	23.1	23.1	23.1
P62754	P62754	5	5	5	40S ribosomal protein S6	Rps6	sp|P62754|RS6_MOUSE 40S ribosomal protein S6 OS=Mus musculus OX=10090 GN=Rps6 PE=1 SV=1	1	5	5	5	4	5	4	3	4	4	4	5	4	3	4	4	4	5	4	3	4	4	21.3	21.3	21.3	28.68	249	249	0	69.808	By MS/MS	By MS/MS	By MS/MS	By MS/MS	By MS/MS	By MS/MS	18.1	21.3	15.3	11.2	17.3	17.3
P62806	P62806	2	2	2	Histone H4	Hist1h4a	sp|P62806|H4_MOUSE Histone H4 OS=Mus musculus OX=10090 GN=Hist1h4a PE=1 SV=2	1	2	2	2	2	2	2	2	2	2	2	2	2	2	2	2	2	2	2	2	2	2	21.4	21.4	21.4	11.367	103	103	0	13.265	By MS/MS	By MS/MS	By MS/MS	By matching	By MS/MS	By MS/MS	21.4	21.4	21.4	21.4	21.4	21.4
Q14AA6;P62827	Q14AA6;P62827	2;2	2;2	2;2	GTP-binding nuclear protein Ran	1700009N14Rik;Ran	tr|Q14AA6|Q14AA6_MOUSE GTP-binding nuclear protein Ran OS=Mus musculus OX=10090 GN=1700009N14Rik PE=2 SV=1;sp|P62827|RAN_MOUSE GTP-binding nuclear protein Ran OS=Mus musculus OX=10090 GN=Ran PE=1 SV=3	2	2	2	2	2	2	2	2	2	2	2	2	2	2	2	2	2	2	2	2	2	2	9.7	9.7	9.7	24.357	216	216;216	0	12.592	By MS/MS	By MS/MS	By MS/MS	By matching	By MS/MS	By matching	9.7	9.7	9.7	9.7	9.7	9.7
P62830;A2A6F8	P62830	4;1	4;1	4;1	60S ribosomal protein L23	Rpl23	sp|P62830|RL23_MOUSE 60S ribosomal protein L23 OS=Mus musculus OX=10090 GN=Rpl23 PE=1 SV=1	2	4	4	4	2	4	3	2	4	3	2	4	3	2	4	3	2	4	3	2	4	3	19.3	19.3	19.3	14.865	140	140;60	0	23.597	By MS/MS	By MS/MS	By MS/MS	By matching	By matching	By matching	12.9	19.3	18.6	12.9	19.3	18.6
P62843	P62843	2	2	2	40S ribosomal protein S15	Rps15	sp|P62843|RS15_MOUSE 40S ribosomal protein S15 OS=Mus musculus OX=10090 GN=Rps15 PE=1 SV=2	1	2	2	2	2	2	2	2	2	2	2	2	2	2	2	2	2	2	2	2	2	2	20	20	20	17.04	145	145	0	20.805	By MS/MS	By MS/MS	By MS/MS	By MS/MS	By MS/MS	By MS/MS	20	20	20	20	20	20
P62849	P62849	1	1	1	40S ribosomal protein S24	Rps24	sp|P62849|RS24_MOUSE 40S ribosomal protein S24 OS=Mus musculus OX=10090 GN=Rps24 PE=1 SV=1	1	1	1	1	1	1	1	1	1	1	1	1	1	1	1	1	1	1	1	1	1	1	6	6	6	15.423	133	133	0	6.8244	By MS/MS	By MS/MS	By MS/MS	By matching	By MS/MS	By MS/MS	6	6	6	6	6	6
P62855	P62855	2	2	2	40S ribosomal protein S26	Rps26	sp|P62855|RS26_MOUSE 40S ribosomal protein S26 OS=Mus musculus OX=10090 GN=Rps26 PE=1 SV=3	1	2	2	2	2	2	2	1	2	2	2	2	2	1	2	2	2	2	2	1	2	2	13.9	13.9	13.9	13.015	115	115	0	12.289	By MS/MS	By MS/MS	By MS/MS	By matching	By MS/MS	By MS/MS	13.9	13.9	13.9	6.1	13.9	13.9
Q642K5;P62862	Q642K5;P62862	1;1	1;1	1;1	40S ribosomal protein S30	Fau	tr|Q642K5|Q642K5_MOUSE 40S ribosomal protein S30 OS=Mus musculus OX=10090 GN=Fau PE=1 SV=1;sp|P62862|RS30_MOUSE 40S ribosomal protein S30 OS=Mus musculus OX=10090 GN=Fau PE=1 SV=1	2	1	1	1	1	1	1	0	1	0	1	1	1	0	1	0	1	1	1	0	1	0	8.3	8.3	8.3	14.416	133	133;59	0	6.9704	By matching	By MS/MS	By matching		By matching		8.3	8.3	8.3	0	8.3	0
P62869	P62869	1	1	1	Transcription elongation factor B polypeptide 2	Tceb2	sp|P62869|ELOB_MOUSE Elongin-B OS=Mus musculus OX=10090 GN=Elob PE=1 SV=1	1	1	1	1	1	1	1	1	1	1	1	1	1	1	1	1	1	1	1	1	1	1	7.6	7.6	7.6	13.17	118	118	0.009165	5.8405	By MS/MS	By MS/MS	By MS/MS	By matching	By matching	By matching	7.6	7.6	7.6	7.6	7.6	7.6
P62889;A0A2I3BQF4	P62889;A0A2I3BQF4	3;2	3;2	3;2	60S ribosomal protein L30	Rpl30	sp|P62889|RL30_MOUSE 60S ribosomal protein L30 OS=Mus musculus OX=10090 GN=Rpl30 PE=1 SV=2;tr|A0A2I3BQF4|A0A2I3BQF4_MOUSE 60S ribosomal protein L30 OS=Mus musculus OX=10090 GN=Rpl30 PE=1 SV=1	2	3	3	3	2	3	2	2	2	2	2	3	2	2	2	2	2	3	2	2	2	2	22.6	22.6	22.6	12.784	115	115;94	0	18.511	By MS/MS	By MS/MS	By MS/MS	By matching	By MS/MS	By MS/MS	14.8	22.6	14.8	14.8	14.8	14.8
P62900;A0A0A6YXL3;A0A0A6YX26	P62900;A0A0A6YXL3;A0A0A6YX26	5;4;4	5;4;4	5;4;4	60S ribosomal protein L31	Rpl31	sp|P62900|RL31_MOUSE 60S ribosomal protein L31 OS=Mus musculus OX=10090 GN=Rpl31 PE=1 SV=1;tr|A0A0A6YXL3|A0A0A6YXL3_MOUSE 60S ribosomal protein L31 OS=Mus musculus OX=10090 GN=Rpl31 PE=1 SV=1;tr|A0A0A6YX26|A0A0A6YX26_MOUSE 60S ribosomal protein L31 OS=Mus	3	5	5	5	3	5	4	4	4	4	3	5	4	4	4	4	3	5	4	4	4	4	28.8	28.8	28.8	14.463	125	125;87;129	0	33.148	By MS/MS	By MS/MS	By MS/MS	By matching	By MS/MS	By MS/MS	21.6	28.8	28	28	28	28
P62908;A0A140LI77;D3YV43	P62908;A0A140LI77;D3YV43	5;3;3	5;3;3	5;3;3	40S ribosomal protein S3	Rps3	sp|P62908|RS3_MOUSE 40S ribosomal protein S3 OS=Mus musculus OX=10090 GN=Rps3 PE=1 SV=1;tr|A0A140LI77|A0A140LI77_MOUSE 40S ribosomal protein S3 OS=Mus musculus OX=10090 GN=Rps3 PE=1 SV=1;tr|D3YV43|D3YV43_MOUSE 40S ribosomal protein S3 OS=Mus musculus OX=10	3	5	5	5	5	5	5	5	5	5	5	5	5	5	5	5	5	5	5	5	5	5	23.9	23.9	23.9	26.674	243	243;144;191	0	44.381	By MS/MS	By MS/MS	By MS/MS	By MS/MS	By MS/MS	By MS/MS	23.9	23.9	23.9	23.9	23.9	23.9
P62911;P17932	P62911;P17932	2;1	2;1	2;1	60S ribosomal protein L32;Putative 60S ribosomal protein L32	Rpl32;Rpl32-ps	sp|P62911|RL32_MOUSE 60S ribosomal protein L32 OS=Mus musculus OX=10090 GN=Rpl32 PE=1 SV=2;sp|P17932|RL32P_MOUSE Putative 60S ribosomal protein L32 OS=Mus musculus OX=10090 GN=Rpl32-ps PE=5 SV=2	2	2	2	2	2	1	2	1	2	2	2	1	2	1	2	2	2	1	2	1	2	2	10.4	10.4	10.4	15.86	135	135;135	0	12.279	By MS/MS	By MS/MS	By MS/MS	By matching	By MS/MS	By matching	10.4	5.2	10.4	5.2	10.4	10.4
P62918	P62918	4	4	4	60S ribosomal protein L8	Rpl8	sp|P62918|RL8_MOUSE 60S ribosomal protein L8 OS=Mus musculus OX=10090 GN=Rpl8 PE=1 SV=2	1	4	4	4	4	4	4	3	4	4	4	4	4	3	4	4	4	4	4	3	4	4	16.3	16.3	16.3	28.024	257	257	0	39.407	By MS/MS	By MS/MS	By MS/MS	By MS/MS	By MS/MS	By MS/MS	16.3	16.3	16.3	13.2	16.3	16.3
P62960;A2BGG7;A0A0A0MQD2;B2RUF0;Q9Z2C8	P62960;A2BGG7	8;6;2;2;2	8;6;2;2;2	6;6;0;0;0	Nuclease-sensitive element-binding protein 1	Ybx1	sp|P62960|YBOX1_MOUSE Nuclease-sensitive element-binding protein 1 OS=Mus musculus OX=10090 GN=Ybx1 PE=1 SV=3;tr|A2BGG7|A2BGG7_MOUSE Nuclease-sensitive element-binding protein 1 (Fragment) OS=Mus musculus OX=10090 GN=Ybx1 PE=1 SV=1	5	8	8	6	5	8	8	7	6	8	5	8	8	7	6	8	3	6	6	5	4	6	38.5	38.5	28.6	35.73	322	322;214;282;359;360	0	85.603	By MS/MS	By MS/MS	By MS/MS	By MS/MS	By MS/MS	By MS/MS	27.3	38.5	38.5	33.9	33.5	38.5
P63017;Q504P4;D3Z5E2	P63017;Q504P4	44;42;8	44;42;8	26;24;5	Heat shock cognate 71 kDa protein	Hspa8	sp|P63017|HSP7C_MOUSE Heat shock cognate 71 kDa protein OS=Mus musculus OX=10090 GN=Hspa8 PE=1 SV=1;tr|Q504P4|Q504P4_MOUSE Heat shock cognate 71 kDa protein OS=Mus musculus OX=10090 GN=Hspa8 PE=1 SV=1	3	44	44	26	42	43	42	34	41	38	42	43	42	34	41	38	25	26	25	23	23	24	58	58	34.7	70.87	646	646;627;116	0	323.31	By MS/MS	By MS/MS	By MS/MS	By MS/MS	By MS/MS	By MS/MS	57.4	58	57.4	48.5	56.3	55.3
P63037;B1AXY1;B1AXY0;B1AXX9	P63037;B1AXY1;B1AXY0	5;4;3;2	5;4;3;2	5;4;3;2	DnaJ homolog subfamily A member 1	Dnaja1	sp|P63037|DNJA1_MOUSE DnaJ homolog subfamily A member 1 OS=Mus musculus OX=10090 GN=Dnaja1 PE=1 SV=1;tr|B1AXY1|B1AXY1_MOUSE DnaJ homolog subfamily A member 1 (Fragment) OS=Mus musculus OX=10090 GN=Dnaja1 PE=1 SV=1;tr|B1AXY0|B1AXY0_MOUSE DnaJ homolog subfam	4	5	5	5	4	5	4	1	3	4	4	5	4	1	3	4	4	5	4	1	3	4	13.1	13.1	13.1	44.868	397	397;278;208;128	0	40.976	By MS/MS	By MS/MS	By MS/MS	By matching	By MS/MS	By MS/MS	9.8	13.1	9.8	3	8.1	9.8
P63038;D3Z7J9;D3Z2F2	P63038	16;6;6	16;6;6	16;6;6	60 kDa heat shock protein, mitochondrial	Hspd1	sp|P63038|CH60_MOUSE 60 kDa heat shock protein, mitochondrial OS=Mus musculus OX=10090 GN=Hspd1 PE=1 SV=1	3	16	16	16	15	16	16	12	13	13	15	16	16	12	13	13	15	16	16	12	13	13	24.8	24.8	24.8	60.955	573	573;142;202	0	191.73	By MS/MS	By MS/MS	By MS/MS	By MS/MS	By MS/MS	By MS/MS	23.4	24.8	24.8	14.8	19	19
P63085	P63085	2	2	2	Mitogen-activated protein kinase 1	Mapk1	sp|P63085|MK01_MOUSE Mitogen-activated protein kinase 1 OS=Mus musculus OX=10090 GN=Mapk1 PE=1 SV=3	1	2	2	2	2	2	2	2	2	2	2	2	2	2	2	2	2	2	2	2	2	2	5.9	5.9	5.9	41.275	358	358	0	19.531	By MS/MS	By MS/MS	By MS/MS	By MS/MS	By MS/MS	By MS/MS	5.9	5.9	5.9	5.9	5.9	5.9
Z4YKV1;P63094;Q6R0H7;A2A610;A2AE31;A2AE32;Q66L47;P20612;Q9DC51;Q3V3I2;P50149;P18872;B2RSH2;Q8CGK7	Z4YKV1;P63094;Q6R0H7;A2A610;A2AE31;A2AE32;Q66L47;P20612;Q9DC51;Q3V3I2;P50149;P18872;B2RSH2;Q8CGK7	2;2;2;1;1;1;1;1;1;1;1;1;1;1	2;2;2;1;1;1;1;1;1;1;1;1;1;1	1;1;1;0;0;0;0;0;0;0;0;0;0;0	Guanine nucleotide-binding protein G(s) subunit alpha isoforms short;Guanine nucleotide-binding protein G(s) subunit alpha isoforms XLas;Guanine nucleotide-binding protein G(t) subunit alpha-1;Guanine nucleotide-binding protein G(k) subunit alpha;Guanine nucleotide-binding protein G(t) subunit alpha-3;Guanine nucleotide-binding protein G(t) subunit alpha-2;Guanine nucleotide-binding protein G(o) …	Gnas;Gnat2;Gnal;Gnat1;Gnai3;Gnat3;Gnao1;Gnai1	tr|Z4YKV1|Z4YKV1_MOUSE Guanine nucleotide-binding protein G(s) subunit alpha isoforms short OS=Mus musculus OX=10090 GN=Gnas PE=1 SV=1;sp|P63094|GNAS2_MOUSE Guanine nucleotide-binding protein G(s) subunit alpha isoforms short OS=Mus musculus OX=10090 GN=Gn	14	2	2	1	2	2	2	1	2	2	2	2	2	1	2	2	1	1	1	1	1	1	7.1	7.1	4.2	44.178	379	379;394;1133;91;112;232;448;350;354;354;354;354;354;381	0	12.902	By MS/MS	By MS/MS	By MS/MS	By matching	By MS/MS	By MS/MS	7.1	7.1	7.1	4.2	7.1	7.1
P63213	P63213	1	1	1	Guanine nucleotide-binding protein G(I)/G(S)/G(O) subunit gamma-2	Gng2	sp|P63213|GBG2_MOUSE Guanine nucleotide-binding protein G(I)/G(S)/G(O) subunit gamma-2 OS=Mus musculus OX=10090 GN=Gng2 PE=1 SV=2	1	1	1	1	1	1	1	1	1	1	1	1	1	1	1	1	1	1	1	1	1	1	16.9	16.9	16.9	7.8501	71	71	0	11.539	By MS/MS	By MS/MS	By MS/MS	By matching	By matching	By matching	16.9	16.9	16.9	16.9	16.9	16.9
P63325;Q3UW83	P63325;Q3UW83	5;3	5;3	5;3	40S ribosomal protein S10	Rps10	sp|P63325|RS10_MOUSE 40S ribosomal protein S10 OS=Mus musculus OX=10090 GN=Rps10 PE=1 SV=1;tr|Q3UW83|Q3UW83_MOUSE 40S ribosomal protein S10 OS=Mus musculus OX=10090 GN=Rps10 PE=1 SV=1	2	5	5	5	3	5	5	3	3	5	3	5	5	3	3	5	3	5	5	3	3	5	24.2	24.2	24.2	18.916	165	165;154	0	56.634	By MS/MS	By MS/MS	By MS/MS	By matching	By MS/MS	By MS/MS	13.3	24.2	24.2	13.3	13.3	24.2
P67778;Q5SQG5	P67778;Q5SQG5	4;3	4;3	4;3	Prohibitin	Phb	sp|P67778|PHB_MOUSE Prohibitin OS=Mus musculus OX=10090 GN=Phb PE=1 SV=1;tr|Q5SQG5|Q5SQG5_MOUSE Prohibitin (Fragment) OS=Mus musculus OX=10090 GN=Phb PE=1 SV=1	2	4	4	4	4	4	4	0	3	2	4	4	4	0	3	2	4	4	4	0	3	2	15.4	15.4	15.4	29.82	272	272;207	0	28.01	By MS/MS	By MS/MS	By MS/MS		By matching	By matching	15.4	15.4	15.4	0	11.8	7.4
P67984	P67984	2	2	2	60S ribosomal protein L22	Rpl22	sp|P67984|RL22_MOUSE 60S ribosomal protein L22 OS=Mus musculus OX=10090 GN=Rpl22 PE=1 SV=2	1	2	2	2	2	2	2	2	2	2	2	2	2	2	2	2	2	2	2	2	2	2	18.8	18.8	18.8	14.759	128	128	0	17.9	By MS/MS	By MS/MS	By matching	By matching	By matching	By matching	18.8	18.8	18.8	18.8	18.8	18.8
P68040	P68040	1	1	1	Guanine nucleotide-binding protein subunit beta-2-like 1;Guanine nucleotide-binding protein subunit beta-2-like 1, N-terminally processed	Gnb2l1	sp|P68040|RACK1_MOUSE Receptor of activated protein C kinase 1 OS=Mus musculus OX=10090 GN=Rack1 PE=1 SV=3	1	1	1	1	1	1	1	1	1	1	1	1	1	1	1	1	1	1	1	1	1	1	3.2	3.2	3.2	35.076	317	317	0	7.2479	By MS/MS	By matching	By MS/MS	By matching	By MS/MS	By matching	3.2	3.2	3.2	3.2	3.2	3.2
P68372;Q9D6F9;CON__ENSEMBL:ENSBTAP00000025008;A2AQ07	P68372;Q9D6F9	11;7;5;5	2;1;0;0	2;1;0;0	Tubulin beta-4B chain;Tubulin beta-4A chain	Tubb4b;Tubb4a	sp|P68372|TBB4B_MOUSE Tubulin beta-4B chain OS=Mus musculus OX=10090 GN=Tubb4b PE=1 SV=1;sp|Q9D6F9|TBB4A_MOUSE Tubulin beta-4A chain OS=Mus musculus OX=10090 GN=Tubb4a PE=1 SV=3	4	11	2	2	9	11	9	7	9	9	2	2	1	1	1	2	2	2	1	1	1	2	21.1	6.1	6.1	49.83	445	445;444;536;451	0	20.206	By MS/MS	By MS/MS	By MS/MS	By matching	By MS/MS	By MS/MS	18.9	21.1	18.4	15.3	17.8	20.9
P68510	P68510	4	2	2	14-3-3 protein eta	Ywhah	sp|P68510|1433F_MOUSE 14-3-3 protein eta OS=Mus musculus OX=10090 GN=Ywhah PE=1 SV=2	1	4	2	2	4	4	4	3	4	4	2	2	2	1	2	2	2	2	2	1	2	2	15.4	9.3	9.3	28.211	246	246	0	15.723	By matching	By MS/MS	By MS/MS	By matching	By MS/MS	By matching	15.4	15.4	15.4	11.8	15.4	15.4
P70168	P70168	2	2	2	Importin subunit beta-1	Kpnb1	sp|P70168|IMB1_MOUSE Importin subunit beta-1 OS=Mus musculus OX=10090 GN=Kpnb1 PE=1 SV=2	1	2	2	2	2	2	2	2	0	2	2	2	2	2	0	2	2	2	2	2	0	2	2.3	2.3	2.3	97.183	876	876	0	16.56	By MS/MS	By MS/MS	By MS/MS	By matching		By matching	2.3	2.3	2.3	2.3	0	2.3
P70206	P70206	1	1	1	Plexin-A1	Plxna1	sp|P70206|PLXA1_MOUSE Plexin-A1 OS=Mus musculus OX=10090 GN=Plxna1 PE=1 SV=1	1	1	1	1	1	1	1	1	1	1	1	1	1	1	1	1	1	1	1	1	1	1	0.7	0.7	0.7	211.1	1894	1894	0	7.9209	By MS/MS	By MS/MS	By MS/MS	By matching	By matching	By matching	0.7	0.7	0.7	0.7	0.7	0.7
P70279;A2ALA0	P70279;A2ALA0	4;3	4;3	4;3	Surfeit locus protein 6	Surf6	sp|P70279|SURF6_MOUSE Surfeit locus protein 6 OS=Mus musculus OX=10090 GN=Surf6 PE=1 SV=1;tr|A2ALA0|A2ALA0_MOUSE Surfeit locus protein 6 OS=Mus musculus OX=10090 GN=Surf6 PE=1 SV=1	2	4	4	4	4	4	3	2	3	3	4	4	3	2	3	3	4	4	3	2	3	3	10.7	10.7	10.7	41.234	355	355;208	0	23.357	By MS/MS	By MS/MS	By MS/MS	By matching	By matching	By matching	10.7	10.7	8.2	5.1	8.2	8.2
Q3U3K9;P70295;A0A0N4SVA6	Q3U3K9;P70295;A0A0N4SVA6	4;4;2	4;4;2	4;4;2	Ancient ubiquitous protein 1	Aup1	tr|Q3U3K9|Q3U3K9_MOUSE Ancient ubiquitous protein 1 OS=Mus musculus OX=10090 GN=Aup1 PE=1 SV=1;sp|P70295|AUP1_MOUSE Ancient ubiquitous protein 1 OS=Mus musculus OX=10090 GN=Aup1 PE=1 SV=1;tr|A0A0N4SVA6|A0A0N4SVA6_MOUSE Ancient ubiquitous protein 1 (Fragmen	3	4	4	4	4	4	4	0	0	1	4	4	4	0	0	1	4	4	4	0	0	1	6.4	6.4	6.4	49.35	439	439;410;391	0	23.465	By matching	By MS/MS	By MS/MS			By matching	6.4	6.4	6.4	0	0	2.7
P70372	P70372	2	2	2	ELAV-like protein 1	Elavl1	sp|P70372|ELAV1_MOUSE ELAV-like protein 1 OS=Mus musculus OX=10090 GN=Elavl1 PE=1 SV=2	1	2	2	2	1	2	2	1	1	1	1	2	2	1	1	1	1	2	2	1	1	1	6.1	6.1	6.1	36.169	326	326	0	17.206	By matching	By MS/MS	By MS/MS	By matching	By MS/MS	By MS/MS	2.8	6.1	6.1	3.4	2.8	2.8
P70698	P70698	8	8	8	CTP synthase 1	Ctps1	sp|P70698|PYRG1_MOUSE CTP synthase 1 OS=Mus musculus OX=10090 GN=Ctps1 PE=1 SV=2	1	8	8	8	8	8	8	0	3	2	8	8	8	0	3	2	8	8	8	0	3	2	9.8	9.8	9.8	66.682	591	591	0	68.573	By MS/MS	By MS/MS	By MS/MS		By matching	By matching	9.8	9.8	9.8	0	4.6	3
P80314;A0A1W2P7B7;A0A1W2P828;A0A1W2P6Q3;A0A1W2P871	P80314;A0A1W2P7B7	11;7;5;5;4	11;7;5;5;4	11;7;5;5;4	T-complex protein 1 subunit beta	Cct2	sp|P80314|TCPB_MOUSE T-complex protein 1 subunit beta OS=Mus musculus OX=10090 GN=Cct2 PE=1 SV=4;tr|A0A1W2P7B7|A0A1W2P7B7_MOUSE T-complex protein 1 subunit beta (Fragment) OS=Mus musculus OX=10090 GN=Cct2 PE=1 SV=1	5	11	11	11	10	11	11	6	11	11	10	11	11	6	11	11	10	11	11	6	11	11	19.8	19.8	19.8	57.477	535	535;217;85;181;64	0	94.912	By MS/MS	By MS/MS	By MS/MS	By matching	By MS/MS	By MS/MS	17	19.8	19.8	11	19.8	19.8
P80315;G5E839;G3UYW5;G3UXF3;G3UXG2	P80315;G5E839	9;8;4;3;3	9;8;4;3;3	9;8;4;3;3	T-complex protein 1 subunit delta	Cct4	sp|P80315|TCPD_MOUSE T-complex protein 1 subunit delta OS=Mus musculus OX=10090 GN=Cct4 PE=1 SV=3;tr|G5E839|G5E839_MOUSE T-complex protein 1 subunit delta OS=Mus musculus OX=10090 GN=Cct4 PE=1 SV=1	5	9	9	9	7	6	7	4	7	7	7	6	7	4	7	7	7	6	7	4	7	7	14.7	14.7	14.7	58.066	539	539;509;120;47;59	0	59.059	By MS/MS	By MS/MS	By MS/MS	By MS/MS	By MS/MS	By MS/MS	11.5	10.6	11.3	6.1	11.3	11.5
P80316;E0CZA1	P80316;E0CZA1	7;4	7;4	7;4	T-complex protein 1 subunit epsilon	Cct5	sp|P80316|TCPE_MOUSE T-complex protein 1 subunit epsilon OS=Mus musculus OX=10090 GN=Cct5 PE=1 SV=1;tr|E0CZA1|E0CZA1_MOUSE T-complex protein 1 subunit epsilon (Fragment) OS=Mus musculus OX=10090 GN=Cct5 PE=1 SV=1	2	7	7	7	7	7	7	6	6	6	7	7	7	6	6	6	7	7	7	6	6	6	12.2	12.2	12.2	59.623	541	541;199	0	45.464	By MS/MS	By MS/MS	By MS/MS	By matching	By MS/MS	By MS/MS	12.2	12.2	12.2	10	10	10
P80317;Q61390;B1AT05	P80317;Q61390	4;3;1	4;3;1	4;3;1	T-complex protein 1 subunit zeta;T-complex protein 1 subunit zeta-2	Cct6a;Cct6b	sp|P80317|TCPZ_MOUSE T-complex protein 1 subunit zeta OS=Mus musculus OX=10090 GN=Cct6a PE=1 SV=3;sp|Q61390|TCPW_MOUSE T-complex protein 1 subunit zeta-2 OS=Mus musculus OX=10090 GN=Cct6b PE=1 SV=4	3	4	4	4	4	4	3	4	4	3	4	4	3	4	4	3	4	4	3	4	4	3	6.8	6.8	6.8	58.004	531	531;531;492	0	28.27	By MS/MS	By MS/MS	By MS/MS	By matching	By MS/MS	By MS/MS	6.8	6.8	5.1	6.8	6.8	4.9
Q3U0I3;P80318;E9Q133;F6Q609	Q3U0I3;P80318;E9Q133	10;10;9;4	10;10;9;4	10;10;9;4	T-complex protein 1 subunit gamma	Cct3	tr|Q3U0I3|Q3U0I3_MOUSE T-complex protein 1 subunit gamma OS=Mus musculus OX=10090 GN=Cct3 PE=1 SV=1;sp|P80318|TCPG_MOUSE T-complex protein 1 subunit gamma OS=Mus musculus OX=10090 GN=Cct3 PE=1 SV=1;tr|E9Q133|E9Q133_MOUSE T-complex protein 1 subunit gamma O	4	10	10	10	9	8	9	8	8	10	9	8	9	8	8	10	9	8	9	8	8	10	16.5	16.5	16.5	58.278	521	521;545;507;306	0	67.142	By MS/MS	By MS/MS	By MS/MS	By matching	By MS/MS	By MS/MS	14.6	12.7	14.6	12.9	14.6	16.5
P81122	P81122	5	5	5	Insulin receptor substrate 2	Irs2	sp|P81122|IRS2_MOUSE Insulin receptor substrate 2 OS=Mus musculus OX=10090 GN=Irs2 PE=1 SV=2	1	5	5	5	4	4	5	0	2	4	4	4	5	0	2	4	4	4	5	0	2	4	4.5	4.5	4.5	136.76	1321	1321	0	33.012	By MS/MS	By MS/MS	By MS/MS		By matching	By matching	3.5	3.9	4.5	0	1.9	3.9
P81269;D3Z7P7;F6U840;D3Z326;F6VJ22;D3Z6A5;F6QWT6;F6U9F5;F6Q346;Q62347;F6W4F5;E9PWV9;D3Z7M6;F6QKL8;D3Z2U7;Q01147	P81269;D3Z7P7;F6U840;D3Z326;F6VJ22;D3Z6A5;F6QWT6;F6U9F5;F6Q346;Q62347;F6W4F5;E9PWV9;D3Z7M6;F6QKL8;D3Z2U7;Q01147	2;1;1;1;1;1;1;1;1;1;1;1;1;1;1;1	2;1;1;1;1;1;1;1;1;1;1;1;1;1;1;1	2;1;1;1;1;1;1;1;1;1;1;1;1;1;1;1	Cyclic AMP-dependent transcription factor ATF-1;Cyclic AMP-responsive element-binding protein 1	Atf1;Crem;Creb1	sp|P81269|ATF1_MOUSE Cyclic AMP-dependent transcription factor ATF-1 OS=Mus musculus OX=10090 GN=Atf1 PE=1 SV=1;tr|D3Z7P7|D3Z7P7_MOUSE cAMP-responsive element modulator OS=Mus musculus OX=10090 GN=Crem PE=1 SV=1;tr|F6U840|F6U840_MOUSE Cyclic AMP-dependent	16	2	2	2	2	2	1	0	0	0	2	2	1	0	0	0	2	2	1	0	0	0	6.3	6.3	6.3	29.237	269	269;95;100;102;113;119;125;223;284;287;298;304;329;335;341;341	0	11.031	By MS/MS	By matching	By matching				6.3	6.3	3	0	0	0
P84104;A2A4X6	P84104	3;1	3;1	3;1	Serine/arginine-rich splicing factor 3	Srsf3	sp|P84104|SRSF3_MOUSE Serine/arginine-rich splicing factor 3 OS=Mus musculus OX=10090 GN=Srsf3 PE=1 SV=1	2	3	3	3	1	3	2	0	1	3	1	3	2	0	1	3	1	3	2	0	1	3	15.9	15.9	15.9	19.329	164	164;163	0	32.819	By MS/MS	By MS/MS	By MS/MS		By matching	By MS/MS	7.3	15.9	12.8	0	7.3	15.9
P85094	P85094	1	1	1	Isochorismatase domain-containing protein 2A, mitochondrial	Isoc2a	sp|P85094|ISC2A_MOUSE Isochorismatase domain-containing protein 2A OS=Mus musculus OX=10090 GN=Isoc2a PE=1 SV=1	1	1	1	1	1	1	1	1	1	1	1	1	1	1	1	1	1	1	1	1	1	1	8.7	8.7	8.7	22.417	206	206	0	8.9255	By MS/MS	By matching	By matching	By matching	By matching	By matching	8.7	8.7	8.7	8.7	8.7	8.7
Q3ULG5;P97311	Q3ULG5;P97311	2;2	2;2	2;2	DNA helicase;DNA replication licensing factor MCM6	Mcm6	tr|Q3ULG5|Q3ULG5_MOUSE DNA helicase OS=Mus musculus OX=10090 GN=Mcm6 PE=1 SV=1;sp|P97311|MCM6_MOUSE DNA replication licensing factor MCM6 OS=Mus musculus OX=10090 GN=Mcm6 PE=1 SV=1	2	2	2	2	2	1	2	0	1	2	2	1	2	0	1	2	2	1	2	0	1	2	2.9	2.9	2.9	89.783	794	794;821	0	14.518	By MS/MS	By matching	By MS/MS		By matching	By matching	2.9	1.3	2.9	0	1.3	2.9
P97351	P97351	9	9	9	40S ribosomal protein S3a	Rps3a	sp|P97351|RS3A_MOUSE 40S ribosomal protein S3a OS=Mus musculus OX=10090 GN=Rps3a PE=1 SV=3	1	9	9	9	8	8	9	7	7	8	8	8	9	7	7	8	8	8	9	7	7	8	30.7	30.7	30.7	29.885	264	264	0	73.054	By MS/MS	By MS/MS	By MS/MS	By MS/MS	By MS/MS	By MS/MS	28	28	30.7	25.4	23.5	26.1
P97379	P97379	2	2	2	Ras GTPase-activating protein-binding protein 2	G3bp2	sp|P97379|G3BP2_MOUSE Ras GTPase-activating protein-binding protein 2 OS=Mus musculus OX=10090 GN=G3bp2 PE=1 SV=2	1	2	2	2	2	2	2	2	2	2	2	2	2	2	2	2	2	2	2	2	2	2	4.4	4.4	4.4	54.087	482	482	0	12.703	By MS/MS	By MS/MS	By MS/MS	By matching	By MS/MS	By MS/MS	4.4	4.4	4.4	4.4	4.4	4.4
P97452	P97452	1	1	1	Ribosome biogenesis protein BOP1	Bop1	sp|P97452|BOP1_MOUSE Ribosome biogenesis protein BOP1 OS=Mus musculus OX=10090 GN=Bop1 PE=1 SV=1	1	1	1	1	1	1	1	1	0	1	1	1	1	1	0	1	1	1	1	1	0	1	1.5	1.5	1.5	82.545	732	732	0	7.2759	By matching	By MS/MS	By matching	By matching		By matching	1.5	1.5	1.5	1.5	0	1.5
Q91V55;P97461;D3YYM6;D3Z1S8	Q91V55;P97461;D3YYM6;D3Z1S8	2;2;1;1	2;2;1;1	2;2;1;1	40S ribosomal protein S5;40S ribosomal protein S5, N-terminally processed	Rps5	tr|Q91V55|Q91V55_MOUSE 40S ribosomal protein S5 OS=Mus musculus OX=10090 GN=Rps5 PE=1 SV=1;sp|P97461|RS5_MOUSE 40S ribosomal protein S5 OS=Mus musculus OX=10090 GN=Rps5 PE=1 SV=3;tr|D3YYM6|D3YYM6_MOUSE 40S ribosomal protein S5 (Fragment) OS=Mus musculus OX	4	2	2	2	1	1	1	0	1	0	1	1	1	0	1	0	1	1	1	0	1	0	8.8	8.8	8.8	22.876	204	204;204;182;189	0	11.865	By MS/MS	By MS/MS	By MS/MS		By MS/MS		4.4	4.4	4.4	0	4.4	0
P97503	P97503	1	1	1	Homeobox protein Nkx-3.2	Nkx3-2	sp|P97503|NKX32_MOUSE Homeobox protein Nkx-3.2 OS=Mus musculus OX=10090 GN=Nkx3-2 PE=1 SV=2	1	1	1	1	0	1	0	0	0	0	0	1	0	0	0	0	0	1	0	0	0	0	2.7	2.7	2.7	35.167	333	333	0.005423	5.9914		By MS/MS					0	2.7	0	0	0	0
P97770	P97770	1	1	1	THUMP domain-containing protein 3	Thumpd3	sp|P97770|THUM3_MOUSE THUMP domain-containing protein 3 OS=Mus musculus OX=10090 GN=Thumpd3 PE=1 SV=1	1	1	1	1	1	1	1	0	0	0	1	1	1	0	0	0	1	1	1	0	0	0	2.2	2.2	2.2	56.431	505	505	0	6.5952	By matching	By matching	By MS/MS				2.2	2.2	2.2	0	0	0
P97807	P97807	1	1	1	Fumarate hydratase, mitochondrial	Fh	sp|P97807|FUMH_MOUSE Fumarate hydratase, mitochondrial OS=Mus musculus OX=10090 GN=Fh PE=1 SV=3	1	1	1	1	1	1	1	0	0	0	1	1	1	0	0	0	1	1	1	0	0	0	2.8	2.8	2.8	54.356	507	507	0.0011507	6.138	By matching	By MS/MS	By MS/MS				2.8	2.8	2.8	0	0	0
P97819	P97819	1	1	1	85/88 kDa calcium-independent phospholipase A2	Pla2g6	sp|P97819|PLPL9_MOUSE 85/88 kDa calcium-independent phospholipase A2 OS=Mus musculus OX=10090 GN=Pla2g6 PE=1 SV=3	1	1	1	1	0	1	0	0	0	0	0	1	0	0	0	0	0	1	0	0	0	0	1.7	1.7	1.7	89.559	807	807	0.0044346	6.0301		By MS/MS					0	1.7	0	0	0	0
P97855	P97855	2	2	2	Ras GTPase-activating protein-binding protein 1	G3bp1	sp|P97855|G3BP1_MOUSE Ras GTPase-activating protein-binding protein 1 OS=Mus musculus OX=10090 GN=G3bp1 PE=1 SV=1	1	2	2	2	1	2	2	2	1	1	1	2	2	2	1	1	1	2	2	2	1	1	6	6	6	51.828	465	465	0	12.443	By matching	By MS/MS	By MS/MS	By matching	By matching	By matching	2.4	6	6	6	2.4	2.4
P98203	P98203	4	4	4	Armadillo repeat protein deleted in velo-cardio-facial syndrome homolog	Arvcf	sp|P98203|ARVC_MOUSE Armadillo repeat protein deleted in velo-cardio-facial syndrome homolog OS=Mus musculus OX=10090 GN=Arvcf PE=1 SV=2	1	4	4	4	3	3	3	0	0	0	3	3	3	0	0	0	3	3	3	0	0	0	5.9	5.9	5.9	105.06	962	962	0	24.857	By matching	By MS/MS	By MS/MS				3.7	4.9	3.7	0	0	0
P99024	P99024	11	4	1	Tubulin beta-5 chain	Tubb5	sp|P99024|TBB5_MOUSE Tubulin beta-5 chain OS=Mus musculus OX=10090 GN=Tubb5 PE=1 SV=1	1	11	4	1	9	11	10	7	10	8	4	4	4	4	4	4	1	1	1	1	1	1	21.2	8.1	2.7	49.67	444	444	0	66.51	By MS/MS	By MS/MS	By MS/MS	By MS/MS	By MS/MS	By MS/MS	18.9	21.2	21.2	15.3	21.2	17.6
P99027	P99027	5	5	5	60S acidic ribosomal protein P2	Rplp2	sp|P99027|RLA2_MOUSE 60S acidic ribosomal protein P2 OS=Mus musculus OX=10090 GN=Rplp2 PE=1 SV=3	1	5	5	5	3	5	3	2	3	3	3	5	3	2	3	3	3	5	3	2	3	3	63.5	63.5	63.5	11.651	115	115	0	51.295	By MS/MS	By MS/MS	By MS/MS	By matching	By MS/MS	By MS/MS	49.6	63.5	53	35.7	49.6	49.6
Q01320	Q01320	2	2	2	DNA topoisomerase 2-alpha	Top2a	sp|Q01320|TOP2A_MOUSE DNA topoisomerase 2-alpha OS=Mus musculus OX=10090 GN=Top2a PE=1 SV=2	1	2	2	2	1	2	2	0	0	1	1	2	2	0	0	1	1	2	2	0	0	1	1.4	1.4	1.4	172.79	1528	1528	0	33.457	By matching	By MS/MS	By MS/MS			By matching	1.2	1.4	1.4	0	0	1.2
Q01853	Q01853	6	6	6	Transitional endoplasmic reticulum ATPase	Vcp	sp|Q01853|TERA_MOUSE Transitional endoplasmic reticulum ATPase OS=Mus musculus OX=10090 GN=Vcp PE=1 SV=4	1	6	6	6	5	5	5	4	6	3	5	5	5	4	6	3	5	5	5	4	6	3	6.3	6.3	6.3	89.321	806	806	0	46.268	By MS/MS	By MS/MS	By MS/MS	By matching	By MS/MS	By MS/MS	5.5	5.5	5.5	5.5	6.3	3.8
Q02257	Q02257	2	2	2	Junction plakoglobin	Jup	sp|Q02257|PLAK_MOUSE Junction plakoglobin OS=Mus musculus OX=10090 GN=Jup PE=1 SV=3	1	2	2	2	1	1	0	2	2	2	1	1	0	2	2	2	1	1	0	2	2	2	3	3	3	81.8	745	745	0	11.546	By matching	By MS/MS		By matching	By MS/MS	By matching	1.3	1.6	0	3	3	3
Q03265;D3Z6F5;D6RJ16	Q03265;D3Z6F5	13;12;2	13;12;2	13;12;2	ATP synthase subunit alpha, mitochondrial;ATP synthase subunit alpha	Atp5a1	sp|Q03265|ATPA_MOUSE ATP synthase subunit alpha, mitochondrial OS=Mus musculus OX=10090 GN=Atp5f1a PE=1 SV=1;tr|D3Z6F5|D3Z6F5_MOUSE ATP synthase subunit alpha OS=Mus musculus OX=10090 GN=Atp5a1 PE=1 SV=1	3	13	13	13	12	13	10	6	9	9	12	13	10	6	9	9	12	13	10	6	9	9	21	21	21	59.752	553	553;503;89	0	113.98	By MS/MS	By MS/MS	By MS/MS	By matching	By MS/MS	By MS/MS	20.3	21	16.8	11.9	15	14.8
Q05CL8;A2AMD0	Q05CL8;A2AMD0	3;2	3;2	3;2	La-related protein 7	Larp7;Gm12666	sp|Q05CL8|LARP7_MOUSE La-related protein 7 OS=Mus musculus OX=10090 GN=Larp7 PE=1 SV=2;tr|A2AMD0|A2AMD0_MOUSE Uncharacterized protein (Fragment) OS=Mus musculus OX=10090 GN=Gm12666 PE=1 SV=1	2	3	3	3	2	3	2	2	2	2	2	3	2	2	2	2	2	3	2	2	2	2	6.7	6.7	6.7	64.802	570	570;254	0	28.153	By MS/MS	By MS/MS	By MS/MS	By matching	By matching	By MS/MS	4.2	6.7	4.2	4.2	4.2	4.2
Q06185	Q06185	1	1	1	ATP synthase subunit e, mitochondrial	Atp5i	sp|Q06185|ATP5I_MOUSE ATP synthase subunit e, mitochondrial OS=Mus musculus OX=10090 GN=Atp5me PE=1 SV=2	1	1	1	1	1	1	1	1	0	0	1	1	1	1	0	0	1	1	1	1	0	0	16.9	16.9	16.9	8.2355	71	71	0	9.8907	By MS/MS	By MS/MS	By MS/MS	By matching			16.9	16.9	16.9	16.9	0	0
Q07417	Q07417	1	1	1	Short-chain specific acyl-CoA dehydrogenase, mitochondrial	Acads	sp|Q07417|ACADS_MOUSE Short-chain specific acyl-CoA dehydrogenase, mitochondrial OS=Mus musculus OX=10090 GN=Acads PE=1 SV=2	1	1	1	1	1	1	1	0	0	0	1	1	1	0	0	0	1	1	1	0	0	0	3.2	3.2	3.2	44.889	412	412	0	6.7282	By matching	By MS/MS	By MS/MS				3.2	3.2	3.2	0	0	0
Q07832;A0A0U1RQ54;A0A0U1RNM9	Q07832;A0A0U1RQ54;A0A0U1RNM9	2;1;1	2;1;1	2;1;1	Serine/threonine-protein kinase PLK1	Plk1	sp|Q07832|PLK1_MOUSE Serine/threonine-protein kinase PLK1 OS=Mus musculus OX=10090 GN=Plk1 PE=1 SV=2;tr|A0A0U1RQ54|A0A0U1RQ54_MOUSE Serine/threonine-protein kinase PLK1 (Fragment) OS=Mus musculus OX=10090 GN=Plk1 PE=1 SV=1;tr|A0A0U1RNM9|A0A0U1RNM9_MOUSE Se	3	2	2	2	2	2	2	0	1	0	2	2	2	0	1	0	2	2	2	0	1	0	5	5	5	68.3	603	603;194;196	0	12.92	By matching	By MS/MS	By MS/MS		By matching		5	5	5	0	1.8	0
Q08288	Q08288	2	2	2	Cell growth-regulating nucleolar protein	Lyar	sp|Q08288|LYAR_MOUSE Cell growth-regulating nucleolar protein OS=Mus musculus OX=10090 GN=Lyar PE=1 SV=2	1	2	2	2	2	1	2	1	1	1	2	1	2	1	1	1	2	1	2	1	1	1	6.2	6.2	6.2	43.735	388	388	0	11.908	By MS/MS	By matching	By matching	By matching	By matching	By MS/MS	6.2	3.6	6.2	3.6	3.6	3.6
Q0VBL3	Q0VBL3	1	1	1		Rbm15	sp|Q0VBL3|RBM15_MOUSE RNA-binding protein 15 OS=Mus musculus OX=10090 GN=Rbm15 PE=1 SV=1	1	1	1	1	0	1	0	0	0	0	0	1	0	0	0	0	0	1	0	0	0	0	2	2	2	105.72	962	962	0	6.8941		By MS/MS					0	2	0	0	0	0
Q80XR6;Q20BD0;Q99020	Q80XR6;Q20BD0;Q99020	2;2;2	2;2;2	2;2;2	Heterogeneous nuclear ribonucleoprotein A/B	Hnrnpab	tr|Q80XR6|Q80XR6_MOUSE Heterogeneous nuclear ribonucleoprotein A/B OS=Mus musculus OX=10090 GN=Hnrnpab PE=1 SV=1;tr|Q20BD0|Q20BD0_MOUSE Heterogeneous nuclear ribonucleoprotein A/B OS=Mus musculus OX=10090 GN=Hnrnpab PE=1 SV=1;sp|Q99020|ROAA_MOUSE Heterogen	3	2	2	2	2	2	2	2	1	1	2	2	2	2	1	1	2	2	2	2	1	1	8.7	8.7	8.7	33.816	311	311;332;285	0	23.396	By MS/MS	By MS/MS	By MS/MS	By matching	By MS/MS	By MS/MS	8.7	8.7	8.7	8.7	4.5	4.5
Q3TCN2	Q3TCN2	1	1	1	Putative phospholipase B-like 2;Putative phospholipase B-like 2 28 kDa form;Putative phospholipase B-like 2 40 kDa form;Putative phospholipase B-like 2 15 kDa form	Plbd2	sp|Q3TCN2|PLBL2_MOUSE Putative phospholipase B-like 2 OS=Mus musculus OX=10090 GN=Plbd2 PE=1 SV=2	1	1	1	1	1	1	1	0	1	1	1	1	1	0	1	1	1	1	1	0	1	1	1.5	1.5	1.5	66.289	594	594	0.0011614	6.1597	By MS/MS	By MS/MS	By matching		By MS/MS	By matching	1.5	1.5	1.5	0	1.5	1.5
Q3TDN2;D3Z2H4;D6RE51	Q3TDN2;D3Z2H4	3;2;1	3;2;1	3;2;1	FAS-associated factor 2	Faf2	sp|Q3TDN2|FAF2_MOUSE FAS-associated factor 2 OS=Mus musculus OX=10090 GN=Faf2 PE=1 SV=2;tr|D3Z2H4|D3Z2H4_MOUSE FAS-associated factor 2 (Fragment) OS=Mus musculus OX=10090 GN=Faf2 PE=1 SV=1	3	3	3	3	3	3	3	1	2	1	3	3	3	1	2	1	3	3	3	1	2	1	7.6	7.6	7.6	52.471	445	445;263;49	0	21.104	By MS/MS	By MS/MS	By MS/MS	By matching	By matching	By matching	7.6	7.6	7.6	1.6	4.3	1.6
Z4YKB8;Q3TEA8;Z4YKA3;A2AM69;A2AM70;A2AM65	Z4YKB8;Q3TEA8;Z4YKA3	3;3;2;1;1;1	3;3;2;1;1;1	3;3;2;1;1;1	Heterochromatin protein 1-binding protein 3	Hp1bp3	tr|Z4YKB8|Z4YKB8_MOUSE Heterochromatin protein 1-binding protein 3 OS=Mus musculus OX=10090 GN=Hp1bp3 PE=1 SV=1;sp|Q3TEA8|HP1B3_MOUSE Heterochromatin protein 1-binding protein 3 OS=Mus musculus OX=10090 GN=Hp1bp3 PE=1 SV=1;tr|Z4YKA3|Z4YKA3_MOUSE Heterochro	6	3	3	3	3	3	3	2	1	3	3	3	3	2	1	3	3	3	3	2	1	3	5.6	5.6	5.6	60.85	554	554;554;516;85;150;292	0	18.197	By MS/MS	By MS/MS	By MS/MS	By matching	By matching	By matching	5.6	5.6	5.6	3.2	2.3	5.6
Q3TJ56;Q78PY7	Q3TJ56;Q78PY7	1;1	1;1	1;1	Staphylococcal nuclease domain-containing protein 1	Snd1	tr|Q3TJ56|Q3TJ56_MOUSE Staphylococcal nuclease domain-containing protein 1 OS=Mus musculus OX=10090 GN=Snd1 PE=1 SV=1;sp|Q78PY7|SND1_MOUSE Staphylococcal nuclease domain-containing protein 1 OS=Mus musculus OX=10090 GN=Snd1 PE=1 SV=1	2	1	1	1	1	1	1	0	0	0	1	1	1	0	0	0	1	1	1	0	0	0	1.6	1.6	1.6	67.692	608	608;910	0	7.5532	By matching	By matching	By MS/MS				1.6	1.6	1.6	0	0	0
Q3TML0;Q922R8	Q3TML0;Q922R8	2;2	2;2	2;2	Protein disulfide-isomerase A6	Pdia6	tr|Q3TML0|Q3TML0_MOUSE Protein disulfide-isomerase A6 OS=Mus musculus OX=10090 GN=Pdia6 PE=1 SV=1;sp|Q922R8|PDIA6_MOUSE Protein disulfide-isomerase A6 OS=Mus musculus OX=10090 GN=Pdia6 PE=1 SV=3	2	2	2	2	1	2	2	1	2	2	1	2	2	1	2	2	1	2	2	1	2	2	3.4	3.4	3.4	48.689	445	445;440	0	13.572	By matching	By MS/MS	By matching	By matching	By MS/MS	By MS/MS	3.4	3.4	3.4	2.5	3.4	3.4
Q3TRJ4	Q3TRJ4	1	1	1	Keratin, type I cytoskeletal 26	Krt26	sp|Q3TRJ4|K1C26_MOUSE Keratin, type I cytoskeletal 26 OS=Mus musculus OX=10090 GN=Krt26 PE=2 SV=1	1	1	1	1	1	1	1	0	1	1	1	1	1	0	1	1	1	1	1	0	1	1	1.7	1.7	1.7	51.117	462	462	0	6.6456	By matching	By MS/MS	By matching		By matching	By matching	1.7	1.7	1.7	0	1.7	1.7
Q3TSG4	Q3TSG4	1	1	1	RNA demethylase ALKBH5	Alkbh5	sp|Q3TSG4|ALKB5_MOUSE RNA demethylase ALKBH5 OS=Mus musculus OX=10090 GN=Alkbh5 PE=1 SV=2	1	1	1	1	0	0	1	0	0	0	0	0	1	0	0	0	0	0	1	0	0	0	3	3	3	44.41	395	395	0	6.9247			By MS/MS				0	0	3	0	0	0
Q3TWW8;A0A0A6YXX6;Q9D8S5;O35326	Q3TWW8	6;1;1;1	6;1;1;1	4;1;0;0	Serine/arginine-rich splicing factor 6	Srsf6	sp|Q3TWW8|SRSF6_MOUSE Serine/arginine-rich splicing factor 6 OS=Mus musculus OX=10090 GN=Srsf6 PE=1 SV=1	4	6	6	4	5	6	6	5	4	4	5	6	6	5	4	4	3	4	4	4	3	3	16.8	16.8	14.2	39.025	339	339;135;270;269	0	49.038	By MS/MS	By MS/MS	By MS/MS	By matching	By MS/MS	By MS/MS	16.2	16.8	16.8	14.2	10.6	10.6
Q3TYL7;Q9QYJ3	Q3TYL7;Q9QYJ3	1;1	1;1	1;1	DnaJ homolog subfamily B member 1	Dnajb1	tr|Q3TYL7|Q3TYL7_MOUSE DnaJ homolog subfamily B member 1 OS=Mus musculus OX=10090 GN=Dnajb1 PE=1 SV=1;sp|Q9QYJ3|DNJB1_MOUSE DnaJ homolog subfamily B member 1 OS=Mus musculus OX=10090 GN=Dnajb1 PE=1 SV=3	2	1	1	1	0	1	1	0	0	0	0	1	1	0	0	0	0	1	1	0	0	0	4.2	4.2	4.2	27.123	240	240;340	0	11.494		By MS/MS	By MS/MS				0	4.2	4.2	0	0	0
Q3U0V1;A0A0A6YVV5;A0A0G2JG00;Q3TUE1;A0A0G2JGW9;A0A0G2JFY5;Q3UUU2;Q91WJ8	Q3U0V1	4;1;1;1;1;1;1;1	4;1;1;1;1;1;1;1	3;0;0;0;0;0;0;0	Far upstream element-binding protein 2	Khsrp	sp|Q3U0V1|FUBP2_MOUSE Far upstream element-binding protein 2 OS=Mus musculus OX=10090 GN=Khsrp PE=1 SV=2	8	4	4	3	4	3	3	2	2	4	4	3	3	2	2	4	3	2	3	2	2	3	5.5	5.5	4.4	76.775	748	748;191;523;642;643;654;700;651	0	29.241	By MS/MS	By matching	By MS/MS	By matching	By MS/MS	By MS/MS	5.5	3.7	4.4	2.7	2.7	5.5
Q3U1J4	Q3U1J4	4	4	4	DNA damage-binding protein 1	Ddb1	sp|Q3U1J4|DDB1_MOUSE DNA damage-binding protein 1 OS=Mus musculus OX=10090 GN=Ddb1 PE=1 SV=2	1	4	4	4	3	4	4	3	4	3	3	4	4	3	4	3	3	4	4	3	4	3	3.8	3.8	3.8	126.85	1140	1140	0	25.706	By MS/MS	By MS/MS	By MS/MS	By MS/MS	By MS/MS	By MS/MS	2.2	3.8	3.8	3	3.8	3
Q3U2G2;Q61316	Q3U2G2;Q61316	23;22	23;22	21;20	Heat shock 70 kDa protein 4	Hspa4	tr|Q3U2G2|Q3U2G2_MOUSE Heat shock 70 kDa protein 4 OS=Mus musculus OX=10090 GN=Hspa4 PE=1 SV=1;sp|Q61316|HSP74_MOUSE Heat shock 70 kDa protein 4 OS=Mus musculus OX=10090 GN=Hspa4 PE=1 SV=1	2	23	23	21	21	22	23	11	15	13	21	22	23	11	15	13	19	20	21	10	13	11	29.5	29.5	27.4	94.208	842	842;841	0	213.37	By MS/MS	By MS/MS	By MS/MS	By matching	By MS/MS	By MS/MS	25.4	29.5	29.5	11.6	19.5	15.2
Q3U7K7;Q62191	Q3U7K7;Q62191	2;1	2;1	2;1	E3 ubiquitin-protein ligase TRIM21	Trim21	tr|Q3U7K7|Q3U7K7_MOUSE E3 ubiquitin-protein ligase TRIM21 OS=Mus musculus OX=10090 GN=Trim21 PE=1 SV=1;sp|Q62191|RO52_MOUSE E3 ubiquitin-protein ligase TRIM21 OS=Mus musculus OX=10090 GN=Trim21 PE=1 SV=1	2	2	2	2	2	2	2	1	2	2	2	2	2	1	2	2	2	2	2	1	2	2	3.2	3.2	3.2	53.327	462	462;470	0	11.067	By MS/MS	By matching	By matching	By matching	By MS/MS	By matching	3.2	3.2	3.2	1.5	3.2	3.2
Q3U9G9;A0A0A6YXT6;A0A0A6YW01;A0A0A6YWS3;A0A0A6YXW3;A0A0A6YY12	Q3U9G9	7;3;3;2;2;1	7;3;3;2;2;1	7;3;3;2;2;1	Lamin-B receptor	Lbr	sp|Q3U9G9|LBR_MOUSE Lamin-B receptor OS=Mus musculus OX=10090 GN=Lbr PE=1 SV=2	6	7	7	7	7	7	7	3	4	7	7	7	7	3	4	7	7	7	7	3	4	7	8.3	8.3	8.3	71.439	626	626;122;132;27;72;202	0	57.508	By MS/MS	By MS/MS	By MS/MS	By matching	By MS/MS	By MS/MS	8.3	8.3	8.3	4.5	4.8	8.3
Q3UDD3;Q8BG81;F6VR84	Q3UDD3;Q8BG81;F6VR84	2;2;1	2;2;1	2;2;1	Polymerase delta-interacting protein 3	Poldip3	tr|Q3UDD3|Q3UDD3_MOUSE Polymerase delta-interacting protein 3 OS=Mus musculus OX=10090 GN=Poldip3 PE=1 SV=1;sp|Q8BG81|PDIP3_MOUSE Polymerase delta-interacting protein 3 OS=Mus musculus OX=10090 GN=Poldip3 PE=1 SV=1;tr|F6VR84|F6VR84_MOUSE Polymerase delta-i	3	2	2	2	1	2	2	1	0	1	1	2	2	1	0	1	1	2	2	1	0	1	7.9	7.9	7.9	42.935	391	391;420;202	0	23.125	By matching	By MS/MS	By MS/MS	By matching		By MS/MS	3.6	7.9	7.9	3.6	0	3.6
Q3UEB3	Q3UEB3	1	1	1	Poly(U)-binding-splicing factor PUF60	Puf60	sp|Q3UEB3|PUF60_MOUSE Poly(U)-binding-splicing factor PUF60 OS=Mus musculus OX=10090 GN=Puf60 PE=1 SV=2	1	1	1	1	1	1	1	0	1	1	1	1	1	0	1	1	1	1	1	0	1	1	1.8	1.8	1.8	60.248	564	564	0.0011601	6.1589	By matching	By matching	By matching		By MS/MS	By matching	1.8	1.8	1.8	0	1.8	1.8
Q3UF95;Q9Z1R2	Q3UF95;Q9Z1R2	2;2	2;2	2;2	Large proline-rich protein BAG6	Bag6	tr|Q3UF95|Q3UF95_MOUSE Large proline-rich protein BAG6 OS=Mus musculus OX=10090 GN=Bag6 PE=1 SV=1;sp|Q9Z1R2|BAG6_MOUSE Large proline-rich protein BAG6 OS=Mus musculus OX=10090 GN=Bag6 PE=1 SV=1	2	2	2	2	1	2	2	1	0	1	1	2	2	1	0	1	1	2	2	1	0	1	2.4	2.4	2.4	119.14	1136	1136;1154	0	12.685	By matching	By MS/MS	By MS/MS	By matching		By matching	1.1	2.4	2.4	1.1	0	1.3
Q3UGB5;Q9JII5	Q3UGB5;Q9JII5	1;1	1;1	1;1	DAZ-associated protein 1	Dazap1	tr|Q3UGB5|Q3UGB5_MOUSE DAZ associated protein 1, isoform CRA_b OS=Mus musculus OX=10090 GN=Dazap1 PE=1 SV=1;sp|Q9JII5|DAZP1_MOUSE DAZ-associated protein 1 OS=Mus musculus OX=10090 GN=Dazap1 PE=1 SV=2	2	1	1	1	1	0	0	0	0	1	1	0	0	0	0	1	1	0	0	0	0	1	2.7	2.7	2.7	43.157	406	406;406	0	6.8247	By MS/MS					By matching	2.7	0	0	0	0	2.7
Q5SV64;Q3UH59;Q61879	Q5SV64;Q3UH59;Q61879	4;4;4	1;1;1	1;1;1	Myosin-10	Myh10	tr|Q5SV64|Q5SV64_MOUSE Myosin-10 OS=Mus musculus OX=10090 GN=Myh10 PE=1 SV=1;tr|Q3UH59|Q3UH59_MOUSE Myosin-10 OS=Mus musculus OX=10090 GN=Myh10 PE=1 SV=1;sp|Q61879|MYH10_MOUSE Myosin-10 OS=Mus musculus OX=10090 GN=Myh10 PE=1 SV=2	3	4	1	1	4	2	3	2	3	1	1	0	1	0	0	0	1	0	1	0	0	0	1.6	0.5	0.5	232.47	2007	2007;2013;1976	0.0053362	5.9363	By MS/MS	By matching	By MS/MS	By matching	By matching	By matching	1.6	1	1.5	0.5	1	0.4
Q3UHD6;A0A0G2JG07	Q3UHD6;A0A0G2JG07	2;1	2;1	2;1	Sorting nexin-27	Snx27	sp|Q3UHD6|SNX27_MOUSE Sorting nexin-27 OS=Mus musculus OX=10090 GN=Snx27 PE=1 SV=2;tr|A0A0G2JG07|A0A0G2JG07_MOUSE Sorting nexin-27 OS=Mus musculus OX=10090 GN=Snx27 PE=1 SV=1	2	2	2	2	2	1	2	1	1	2	2	1	2	1	1	2	2	1	2	1	1	2	3.7	3.7	3.7	60.988	539	539;63	0	11.844	By MS/MS	By MS/MS	By MS/MS	By matching	By matching	By matching	3.7	1.9	3.7	1.9	1.9	3.7
Q3UI84;Q99J62;D6RGM1	Q3UI84;Q99J62;D6RGM1	2;2;1	2;2;1	2;2;1	Replication factor C subunit 4	Rfc4	tr|Q3UI84|Q3UI84_MOUSE Replication factor C subunit 4 OS=Mus musculus OX=10090 GN=Rfc4 PE=1 SV=1;sp|Q99J62|RFC4_MOUSE Replication factor C subunit 4 OS=Mus musculus OX=10090 GN=Rfc4 PE=1 SV=1;tr|D6RGM1|D6RGM1_MOUSE Replication factor C subunit 4 OS=Mus mus	3	2	2	2	2	2	2	0	0	0	2	2	2	0	0	0	2	2	2	0	0	0	5.4	5.4	5.4	40.918	370	370;364;98	0	11.187	By MS/MS	By MS/MS	By MS/MS				5.4	5.4	5.4	0	0	0
Q3UJB0	Q3UJB0	3	3	3		Sf3b2	tr|Q3UJB0|Q3UJB0_MOUSE Splicing factor 3b, subunit 2 OS=Mus musculus OX=10090 GN=Sf3b2 PE=1 SV=1	1	3	3	3	1	2	3	2	3	3	1	2	3	2	3	3	1	2	3	2	3	3	3.3	3.3	3.3	98.197	878	878	0	17.021	By MS/MS	By MS/MS	By MS/MS	By matching	By matching	By MS/MS	1.1	1.9	3.3	1.9	3.3	3.3
Q3UL36;A0A140LIS5	Q3UL36;A0A140LIS5	5;4	5;4	5;4	Arginine and glutamate-rich protein 1	Arglu1	sp|Q3UL36|ARGL1_MOUSE Arginine and glutamate-rich protein 1 OS=Mus musculus OX=10090 GN=Arglu1 PE=1 SV=2;tr|A0A140LIS5|A0A140LIS5_MOUSE Arginine and glutamate-rich protein 1 (Fragment) OS=Mus musculus OX=10090 GN=Arglu1 PE=1 SV=1	2	5	5	5	4	4	4	0	3	4	4	4	4	0	3	4	4	4	4	0	3	4	14.4	14.4	14.4	32.887	271	271;215	0	29.553	By MS/MS	By MS/MS	By MS/MS		By MS/MS	By MS/MS	11.4	11.4	11.4	0	8.9	11.8
Q6PD20;Q3ULD5	Q6PD20;Q3ULD5	1;1	1;1	1;1	Methylcrotonoyl-CoA carboxylase beta chain, mitochondrial	Mccc2	tr|Q6PD20|Q6PD20_MOUSE Mccc2 protein (Fragment) OS=Mus musculus OX=10090 GN=Mccc2 PE=1 SV=1;sp|Q3ULD5|MCCB_MOUSE Methylcrotonoyl-CoA carboxylase beta chain, mitochondrial OS=Mus musculus OX=10090 GN=Mccc2 PE=1 SV=1	2	1	1	1	0	1	0	0	0	0	0	1	0	0	0	0	0	1	0	0	0	0	5.1	5.1	5.1	30.177	276	276;563	0.0011534	6.1463		By MS/MS					0	5.1	0	0	0	0
Q3UV17	Q3UV17	7	1	1	Keratin, type II cytoskeletal 2 oral	Krt76	sp|Q3UV17|K22O_MOUSE Keratin, type II cytoskeletal 2 oral OS=Mus musculus OX=10090 GN=Krt76 PE=1 SV=1	1	7	1	1	4	5	4	5	6	3	1	1	1	1	1	1	1	1	1	1	1	1	8.8	1.5	1.5	62.844	594	594	0	7.2399	By MS/MS	By MS/MS	By MS/MS	By matching	By matching	By MS/MS	5.9	5.6	5.9	6.7	8.8	4.4
Q3V080	Q3V080	1	1	1	Zinc finger protein 583	Znf583	sp|Q3V080|ZN583_MOUSE Zinc finger protein 583 OS=Mus musculus OX=10090 GN=Znf583 PE=2 SV=1	1	1	1	1	1	1	1	1	1	1	1	1	1	1	1	1	1	1	1	1	1	1	1.6	1.6	1.6	65.709	568	568	0	6.6531	By MS/MS	By MS/MS	By MS/MS	By matching	By matching	By matching	1.6	1.6	1.6	1.6	1.6	1.6
Q3V3R1	Q3V3R1	10	9	9	Monofunctional C1-tetrahydrofolate synthase, mitochondrial	Mthfd1l	sp|Q3V3R1|C1TM_MOUSE Monofunctional C1-tetrahydrofolate synthase, mitochondrial OS=Mus musculus OX=10090 GN=Mthfd1l PE=1 SV=2	1	10	9	9	10	9	9	0	3	4	9	8	9	0	3	3	9	8	9	0	3	3	8.9	8.2	8.2	105.73	977	977	0	57.033	By MS/MS	By MS/MS	By MS/MS		By matching	By matching	8.9	7.7	8.2	0	2.9	3.8
Q4FZF3	Q4FZF3	1	1	1	Probable ATP-dependent RNA helicase DDX49	Ddx49	sp|Q4FZF3|DDX49_MOUSE Probable ATP-dependent RNA helicase DDX49 OS=Mus musculus OX=10090 GN=Ddx49 PE=2 SV=1	1	1	1	1	1	1	1	0	0	0	1	1	1	0	0	0	1	1	1	0	0	0	2.7	2.7	2.7	54.093	480	480	0.0033482	6.0527	By matching	By matching	By MS/MS				2.7	2.7	2.7	0	0	0
Q4VA98;Q6IQX8	Q4VA98;Q6IQX8	1;1	1;1	1;1		Zfp219	tr|Q4VA98|Q4VA98_MOUSE Zfp219 protein OS=Mus musculus OX=10090 GN=Zfp219 PE=1 SV=1;sp|Q6IQX8|ZN219_MOUSE Zinc finger protein 219 OS=Mus musculus OX=10090 GN=Znf219 PE=1 SV=1	2	1	1	1	0	0	1	0	0	0	0	0	1	0	0	0	0	0	1	0	0	0	1.8	1.8	1.8	73.226	681	681;726	0.0091463	5.84			By MS/MS				0	0	1.8	0	0	0
Q4VBF8;Q8C0T5	Q4VBF8;Q8C0T5	2;2	2;2	2;2	Signal-induced proliferation-associated 1-like protein 1	Sipa1l1	tr|Q4VBF8|Q4VBF8_MOUSE Signal-induced proliferation-associated 1-like protein 1 OS=Mus musculus OX=10090 GN=Sipa1l1 PE=1 SV=1;sp|Q8C0T5|SI1L1_MOUSE Signal-induced proliferation-associated 1-like protein 1 OS=Mus musculus OX=10090 GN=Sipa1l1 PE=1 SV=2	2	2	2	2	2	2	1	0	0	0	2	2	1	0	0	0	2	2	1	0	0	0	1.4	1.4	1.4	189.01	1713	1713;1782	0	11.954	By matching	By MS/MS	By MS/MS				1.4	1.4	0.8	0	0	0
Q542V3;Q8VE97	Q542V3;Q8VE97	4;4	2;2	2;2	Serine/arginine-rich splicing factor 4	Srsf4	tr|Q542V3|Q542V3_MOUSE Serine/arginine-rich-splicing factor 4 OS=Mus musculus OX=10090 GN=Srsf4 PE=1 SV=1;sp|Q8VE97|SRSF4_MOUSE Serine/arginine-rich splicing factor 4 OS=Mus musculus OX=10090 GN=Srsf4 PE=2 SV=1	2	4	2	2	3	3	4	2	3	2	1	1	2	1	2	1	1	1	2	1	2	1	8.8	4.5	4.5	56.248	491	491;489	0	13.298	By MS/MS	By MS/MS	By MS/MS	By matching	By MS/MS	By MS/MS	6.9	6.9	8.8	5.1	6.9	5.1
Q561M1;Q9D358;A0A1W2P7X3	Q561M1;Q9D358;A0A1W2P7X3	3;3;2	3;3;2	3;3;2	Low molecular weight phosphotyrosine protein phosphatase	Acp1	tr|Q561M1|Q561M1_MOUSE Acp1 protein OS=Mus musculus OX=10090 GN=Acp1 PE=1 SV=1;sp|Q9D358|PPAC_MOUSE Low molecular weight phosphotyrosine protein phosphatase OS=Mus musculus OX=10090 GN=Acp1 PE=1 SV=3;tr|A0A1W2P7X3|A0A1W2P7X3_MOUSE Low molecular weight phos	3	3	3	3	2	3	2	0	3	2	2	3	2	0	3	2	2	3	2	0	3	2	17.1	17.1	17.1	17.922	158	158;158;114	0	21.59	By MS/MS	By MS/MS	By MS/MS		By matching	By matching	12.7	17.1	12.7	0	17.1	12.7
Q5F2E7	Q5F2E7	3	3	3	Nuclear fragile X mental retardation-interacting protein 2	Nufip2	sp|Q5F2E7|NUFP2_MOUSE Nuclear fragile X mental retardation-interacting protein 2 OS=Mus musculus OX=10090 GN=Nufip2 PE=1 SV=1	1	3	3	3	3	2	3	0	1	1	3	2	3	0	1	1	3	2	3	0	1	1	5.8	5.8	5.8	75.656	692	692	0	25.467	By MS/MS	By MS/MS	By MS/MS		By matching	By MS/MS	5.8	3.8	5.8	0	1.9	1.9
Q5ND52	Q5ND52	1	1	1	rRNA methyltransferase 3, mitochondrial	Rnmtl1	sp|Q5ND52|MRM3_MOUSE rRNA methyltransferase 3, mitochondrial OS=Mus musculus OX=10090 GN=Mrm3 PE=2 SV=1	1	1	1	1	1	1	1	1	1	1	1	1	1	1	1	1	1	1	1	1	1	1	2.6	2.6	2.6	46.795	418	418	0	8.0082	By MS/MS	By MS/MS	By MS/MS	By matching	By matching	By matching	2.6	2.6	2.6	2.6	2.6	2.6
Q5RL57;Q9R0L7	Q5RL57;Q9R0L7	1;1	1;1	1;1	A-kinase anchor protein 8-like	Akap8l	tr|Q5RL57|Q5RL57_MOUSE A kinase (PRKA) anchor protein 8-like OS=Mus musculus OX=10090 GN=Akap8l PE=1 SV=1;sp|Q9R0L7|AKP8L_MOUSE A-kinase anchor protein 8-like OS=Mus musculus OX=10090 GN=Akap8l PE=1 SV=1	2	1	1	1	1	1	1	0	0	0	1	1	1	0	0	0	1	1	1	0	0	0	2	2	2	71.3	641	641;642	0.0053996	5.978	By MS/MS	By matching	By matching				2	2	2	0	0	0
Q5SNZ0	Q5SNZ0	1	1	1	Girdin	Ccdc88a	sp|Q5SNZ0|GRDN_MOUSE Girdin OS=Mus musculus OX=10090 GN=Ccdc88a PE=1 SV=2	1	1	1	1	0	0	1	0	0	0	0	0	1	0	0	0	0	0	1	0	0	0	0.5	0.5	0.5	215.92	1873	1873	0.0011765	6.2235			By MS/MS				0	0	0.5	0	0	0
Q5SQ20;Q9EQ61	Q5SQ20;Q9EQ61	3;3	3;3	3;3	Pescadillo homolog	Pes1	tr|Q5SQ20|Q5SQ20_MOUSE Pescadillo homolog OS=Mus musculus OX=10090 GN=Pes1 PE=1 SV=1;sp|Q9EQ61|PESC_MOUSE Pescadillo homolog OS=Mus musculus OX=10090 GN=Pes1 PE=1 SV=1	2	3	3	3	2	3	3	1	1	1	2	3	3	1	1	1	2	3	3	1	1	1	6.1	6.1	6.1	68.23	588	588;584	0	17.716	By MS/MS	By MS/MS	By MS/MS	By matching	By matching	By matching	4.3	6.1	6.1	1.5	1.5	1.5
Q9DAY9;Q5SQB5;Q61937;Q5SQB0	Q9DAY9;Q5SQB5;Q61937;Q5SQB0	11;11;11;8	11;11;11;8	11;11;11;8	Nucleophosmin	Npm1	tr|Q9DAY9|Q9DAY9_MOUSE Nucleophosmin OS=Mus musculus OX=10090 GN=Npm1 PE=1 SV=1;tr|Q5SQB5|Q5SQB5_MOUSE Nucleophosmin OS=Mus musculus OX=10090 GN=Npm1 PE=1 SV=1;sp|Q61937|NPM_MOUSE Nucleophosmin OS=Mus musculus OX=10090 GN=Npm1 PE=1 SV=1;tr|Q5SQB0|Q5SQB0_MO	4	11	11	11	9	11	10	9	8	9	9	11	10	9	8	9	9	11	10	9	8	9	34.2	34.2	34.2	28.385	257	257;285;292;264	0	105.61	By MS/MS	By MS/MS	By MS/MS	By MS/MS	By MS/MS	By MS/MS	27.2	34.2	31.9	29.6	28.8	31.9
Q5SUT0;Q5SUS9;Q61545;Q5SUS8	Q5SUT0;Q5SUS9;Q61545	5;5;5;1	5;5;5;1	5;5;5;1	RNA-binding protein EWS	Ewsr1	tr|Q5SUT0|Q5SUT0_MOUSE RNA-binding protein EWS OS=Mus musculus OX=10090 GN=Ewsr1 PE=1 SV=1;tr|Q5SUS9|Q5SUS9_MOUSE RNA-binding protein EWS OS=Mus musculus OX=10090 GN=Ewsr1 PE=1 SV=1;sp|Q61545|EWS_MOUSE RNA-binding protein EWS OS=Mus musculus OX=10090 GN=Ew	4	5	5	5	3	4	3	2	3	3	3	4	3	2	3	3	3	4	3	2	3	3	11	11	11	64.988	618	618;661;655;354	0	81.587	By MS/MS	By MS/MS	By MS/MS	By MS/MS	By MS/MS	By MS/MS	7.6	8.6	7.6	6.1	6.1	7.6
Q5SVX2;Q9D0R4	Q5SVX2;Q9D0R4	1;1	1;1	1;1	Probable ATP-dependent RNA helicase DDX56	Ddx56	tr|Q5SVX2|Q5SVX2_MOUSE Probable ATP-dependent RNA helicase DDX56 (Fragment) OS=Mus musculus OX=10090 GN=Ddx56 PE=1 SV=1;sp|Q9D0R4|DDX56_MOUSE Probable ATP-dependent RNA helicase DDX56 OS=Mus musculus OX=10090 GN=Ddx56 PE=2 SV=1	2	1	1	1	0	0	1	1	0	1	0	0	1	1	0	1	0	0	1	1	0	1	5.9	5.9	5.9	26.408	237	237;546	0	9.8291			By MS/MS	By matching		By matching	0	0	5.9	5.9	0	5.9
Q5SWU9;V9GWS0	Q5SWU9	22;1	22;1	20;1	Acetyl-CoA carboxylase 1;Biotin carboxylase	Acaca	sp|Q5SWU9|ACACA_MOUSE Acetyl-CoA carboxylase 1 OS=Mus musculus OX=10090 GN=Acaca PE=1 SV=1	2	22	22	20	21	19	18	17	18	15	21	19	18	17	18	15	19	17	17	16	17	13	16.5	16.5	15	265.25	2345	2345;312	0	268.89	By MS/MS	By MS/MS	By MS/MS	By MS/MS	By MS/MS	By MS/MS	15.7	14.7	13.4	13.7	13.8	11.8
Q5SX75;Q60716;B0QZH3;B0QZH1;Q5SX76;B0QZH2;F6ULE1	Q5SX75;Q60716;B0QZH3	6;6;3;2;2;2;1	6;6;3;2;2;2;1	6;6;3;2;2;2;1	Prolyl 4-hydroxylase subunit alpha-2	P4ha2	tr|Q5SX75|Q5SX75_MOUSE Procollagen-proline, 2-oxoglutarate 4-dioxygenase (Proline 4-hydroxylase), alpha II polypeptide, isoform CRA_f OS=Mus musculus OX=10090 GN=P4ha2 PE=1 SV=1;sp|Q60716|P4HA2_MOUSE Prolyl 4-hydroxylase subunit alpha-2 OS=Mus musculus OX=	7	6	6	6	5	6	6	0	0	0	5	6	6	0	0	0	5	6	6	0	0	0	13.8	13.8	13.8	61.014	537	537;537;158;108;112;128;25	0	43.21	By MS/MS	By MS/MS	By MS/MS				11.5	13.8	13.8	0	0	0
Q5U4C5;Q8VI75	Q5U4C5;Q8VI75	1;1	1;1	1;1	Importin-4	Ipo4	tr|Q5U4C5|Q5U4C5_MOUSE Importin-4 OS=Mus musculus OX=10090 GN=Ipo4 PE=1 SV=1;sp|Q8VI75|IPO4_MOUSE Importin-4 OS=Mus musculus OX=10090 GN=Ipo4 PE=1 SV=1	2	1	1	1	1	1	1	0	1	1	1	1	1	0	1	1	1	1	1	0	1	1	2.1	2.1	2.1	90.724	818	818;1082	0	7.0764	By matching	By MS/MS	By matching		By matching	By matching	2.1	2.1	2.1	0	2.1	2.1
Q60596	Q60596	1	1	1	DNA repair protein XRCC1	Xrcc1	sp|Q60596|XRCC1_MOUSE DNA repair protein XRCC1 OS=Mus musculus OX=10090 GN=Xrcc1 PE=1 SV=2	1	1	1	1	1	0	0	1	1	1	1	0	0	1	1	1	1	0	0	1	1	1	2.1	2.1	2.1	68.97	631	631	0.0011655	6.167	By MS/MS			By matching	By matching	By matching	2.1	0	0	2.1	2.1	2.1
Z4YJV4;Q60597;B2RXT3;E9Q7L0	Z4YJV4;Q60597;B2RXT3;E9Q7L0	2;2;1;1	2;2;1;1	2;2;1;1	2-oxoglutarate dehydrogenase, mitochondrial	Ogdh;Ogdhl	tr|Z4YJV4|Z4YJV4_MOUSE 2-oxoglutarate dehydrogenase, mitochondrial OS=Mus musculus OX=10090 GN=Ogdh PE=1 SV=1;sp|Q60597|ODO1_MOUSE 2-oxoglutarate dehydrogenase, mitochondrial OS=Mus musculus OX=10090 GN=Ogdh PE=1 SV=3;tr|B2RXT3|B2RXT3_MOUSE Ogdhl protein O	4	2	2	2	2	2	2	1	2	2	2	2	2	1	2	2	2	2	2	1	2	2	2	2	2	116.03	1019	1019;1023;1010;1029	0	11.788	By MS/MS	By matching	By MS/MS	By matching	By MS/MS	By MS/MS	2	2	2	1	2	2
Q921L6;Q60598	Q921L6;Q60598	3;3	3;3	3;3	Src substrate cortactin	Cttn	tr|Q921L6|Q921L6_MOUSE Cortactin, isoform CRA_a OS=Mus musculus OX=10090 GN=Cttn PE=1 SV=1;sp|Q60598|SRC8_MOUSE Src substrate cortactin OS=Mus musculus OX=10090 GN=Cttn PE=1 SV=2	2	3	3	3	3	3	3	1	2	2	3	3	3	1	2	2	3	3	3	1	2	2	7.9	7.9	7.9	57.086	509	509;546	0	18.616	By MS/MS	By MS/MS	By MS/MS	By matching	By matching	By MS/MS	7.9	7.9	7.9	3.9	5.9	5.9
Q60692	Q60692	2	2	2	Proteasome subunit beta type-6	Psmb6	sp|Q60692|PSB6_MOUSE Proteasome subunit beta type-6 OS=Mus musculus OX=10090 GN=Psmb6 PE=1 SV=3	1	2	2	2	2	2	1	1	1	1	2	2	1	1	1	1	2	2	1	1	1	1	8.8	8.8	8.8	25.378	238	238	0	16.055	By MS/MS	By MS/MS	By MS/MS	By MS/MS	By matching	By matching	8.8	8.8	4.6	4.6	4.6	4.6
Q60714	Q60714	1	1	1	Long-chain fatty acid transport protein 1	Slc27a1	sp|Q60714|S27A1_MOUSE Long-chain fatty acid transport protein 1 OS=Mus musculus OX=10090 GN=Slc27a1 PE=1 SV=1	1	1	1	1	1	1	1	0	0	0	1	1	1	0	0	0	1	1	1	0	0	0	1.9	1.9	1.9	71.275	646	646	0	10.4	By matching	By MS/MS	By MS/MS				1.9	1.9	1.9	0	0	0
Q60749;Q9WU01	Q60749	3;1	3;1	3;1	KH domain-containing, RNA-binding, signal transduction-associated protein 1	Khdrbs1	sp|Q60749|KHDR1_MOUSE KH domain-containing, RNA-binding, signal transduction-associated protein 1 OS=Mus musculus OX=10090 GN=Khdrbs1 PE=1 SV=2	2	3	3	3	3	2	3	2	2	3	3	2	3	2	2	3	3	2	3	2	2	3	4.3	4.3	4.3	48.37	443	443;349	0	20.363	By MS/MS	By MS/MS	By MS/MS	By matching	By matching	By MS/MS	4.3	2.5	4.3	2.5	2.5	4.3
Q60864	Q60864	6	6	6	Stress-induced-phosphoprotein 1	Stip1	sp|Q60864|STIP1_MOUSE Stress-induced-phosphoprotein 1 OS=Mus musculus OX=10090 GN=Stip1 PE=1 SV=1	1	6	6	6	6	6	5	4	4	6	6	6	5	4	4	6	6	6	5	4	4	6	10.1	10.1	10.1	62.581	543	543	0	41.467	By MS/MS	By MS/MS	By MS/MS	By matching	By matching	By matching	10.1	10.1	7.9	6.3	7	10.1
Q60865	Q60865	3	3	3	Caprin-1	Caprin1	sp|Q60865|CAPR1_MOUSE Caprin-1 OS=Mus musculus OX=10090 GN=Caprin1 PE=1 SV=2	1	3	3	3	2	2	2	3	3	3	2	2	2	3	3	3	2	2	2	3	3	3	4.5	4.5	4.5	78.168	707	707	0	19.529	By MS/MS	By matching	By matching	By matching	By MS/MS	By MS/MS	3.3	3.3	3.3	4.5	4.5	4.5
Q60972	Q60972	1	1	1	Histone-binding protein RBBP4	Rbbp4	sp|Q60972|RBBP4_MOUSE Histone-binding protein RBBP4 OS=Mus musculus OX=10090 GN=Rbbp4 PE=1 SV=5	1	1	1	1	1	1	1	1	1	1	1	1	1	1	1	1	1	1	1	1	1	1	3.3	3.3	3.3	47.655	425	425	0	16.331	By MS/MS	By MS/MS	By MS/MS	By matching	By matching	By matching	3.3	3.3	3.3	3.3	3.3	3.3
Q61029;Q61033	Q61029;Q61033	5;4	5;4	5;4	Lamina-associated polypeptide 2, isoforms beta/delta/epsilon/gamma;Lamina-associated polypeptide 2, isoforms alpha/zeta	Tmpo	sp|Q61029|LAP2B_MOUSE Lamina-associated polypeptide 2, isoforms beta/delta/epsilon/gamma OS=Mus musculus OX=10090 GN=Tmpo PE=1 SV=4;sp|Q61033|LAP2A_MOUSE Lamina-associated polypeptide 2, isoforms alpha/zeta OS=Mus musculus OX=10090 GN=Tmpo PE=1 SV=4	2	5	5	5	2	5	4	3	3	3	2	5	4	3	3	3	2	5	4	3	3	3	15	15	15	50.372	452	452;693	0	32.94	By MS/MS	By MS/MS	By MS/MS	By matching	By MS/MS	By MS/MS	6.2	15	11.5	8.6	8.8	8.6
Q61171;D3Z4A4	Q61171;D3Z4A4	5;3	5;3	5;3	Peroxiredoxin-2	Prdx2	sp|Q61171|PRDX2_MOUSE Peroxiredoxin-2 OS=Mus musculus OX=10090 GN=Prdx2 PE=1 SV=3;tr|D3Z4A4|D3Z4A4_MOUSE Peroxiredoxin-2 (Fragment) OS=Mus musculus OX=10090 GN=Prdx2 PE=1 SV=8	2	5	5	5	5	4	3	4	5	4	5	4	3	4	5	4	5	4	3	4	5	4	22.7	22.7	22.7	21.778	198	198;146	0	31.835	By MS/MS	By MS/MS	By MS/MS	By matching	By MS/MS	By MS/MS	22.7	18.7	15.2	18.7	22.7	18.7
Q61249	Q61249	1	1	1	Immunoglobulin-binding protein 1	Igbp1	sp|Q61249|IGBP1_MOUSE Immunoglobulin-binding protein 1 OS=Mus musculus OX=10090 GN=Igbp1 PE=1 SV=1	1	1	1	1	1	1	1	0	0	0	1	1	1	0	0	0	1	1	1	0	0	0	4.4	4.4	4.4	38.97	340	340	0	8.9522	By matching	By MS/MS	By MS/MS				4.4	4.4	4.4	0	0	0
Q61335	Q61335	2	2	2	B-cell receptor-associated protein 31	Bcap31	sp|Q61335|BAP31_MOUSE B-cell receptor-associated protein 31 OS=Mus musculus OX=10090 GN=Bcap31 PE=1 SV=4	1	2	2	2	2	2	2	1	0	1	2	2	2	1	0	1	2	2	2	1	0	1	7.8	7.8	7.8	27.956	245	245	0	15.46	By MS/MS	By MS/MS	By MS/MS	By matching		By matching	7.8	7.8	7.8	3.7	0	3.7
Q61584;A0A0G2JEP0;A0A0H2UH27;A0A0G2JGL6;Q6P5B5	Q61584;A0A0G2JEP0;A0A0H2UH27	10;8;5;2;2	10;8;5;2;2	9;7;4;2;1	Fragile X mental retardation syndrome-related protein 1	Fxr1	sp|Q61584|FXR1_MOUSE Fragile X mental retardation syndrome-related protein 1 OS=Mus musculus OX=10090 GN=Fxr1 PE=1 SV=2;tr|A0A0G2JEP0|A0A0G2JEP0_MOUSE Fragile X mental retardation syndrome-related protein 1 OS=Mus musculus OX=10090 GN=Fxr1 PE=1 SV=1;tr|A0A	5	10	10	9	8	10	8	8	9	9	8	10	8	8	9	9	8	9	8	7	8	8	14.6	14.6	13.4	76.221	677	677;568;454;133;674	0	74.382	By MS/MS	By MS/MS	By MS/MS	By MS/MS	By MS/MS	By MS/MS	11.2	14.6	12.3	12.1	14.5	13.4
Q61595	Q61595	10	1	1	Kinectin	Ktn1	sp|Q61595|KTN1_MOUSE Kinectin OS=Mus musculus OX=10090 GN=Ktn1 PE=1 SV=1	1	10	1	1	9	9	10	7	7	6	1	1	1	1	1	1	1	1	1	1	1	1	7.3	0.5	0.5	152.59	1327	1327	1	-2	By matching	By MS/MS	By MS/MS	By matching	By matching	By matching	6.6	6.8	7.3	5.2	5.2	4.7
Q8R3C7;Q8BZY3;Q61655;Q9QY15	Q8R3C7;Q8BZY3;Q61655	3;3;3;1	3;3;3;1	3;3;3;1	ATP-dependent RNA helicase DDX19A	Ddx19b;Ddx19a	tr|Q8R3C7|Q8R3C7_MOUSE DEAD (Asp-Glu-Ala-Asp) box polypeptide 19b OS=Mus musculus OX=10090 GN=Ddx19b PE=1 SV=1;tr|Q8BZY3|Q8BZY3_MOUSE DEAD (Asp-Glu-Ala-Asp) box polypeptide 19b OS=Mus musculus OX=10090 GN=Ddx19b PE=1 SV=1;sp|Q61655|DD19A_MOUSE ATP-dependen	4	3	3	3	3	2	3	0	0	1	3	2	3	0	0	1	3	2	3	0	0	1	7.3	7.3	7.3	53.893	479	479;494;478;484	0	19.616	By MS/MS	By MS/MS	By MS/MS			By matching	7.3	5.2	7.3	0	0	2.1
Q8BTS0;Q61656;S4R1I6;B1ARC0;B1ARB9;S4R1E3;Q3U741;Q501J6;Q3TU25	Q8BTS0;Q61656;S4R1I6	14;14;9;5;5;3;3;3;2	14;14;9;5;5;3;3;3;2	13;13;8;5;5;3;2;2;1	Probable ATP-dependent RNA helicase DDX5	Ddx5	tr|Q8BTS0|Q8BTS0_MOUSE DEAD (Asp-Glu-Ala-Asp) box polypeptide 5 OS=Mus musculus OX=10090 GN=Ddx5 PE=1 SV=1;sp|Q61656|DDX5_MOUSE Probable ATP-dependent RNA helicase DDX5 OS=Mus musculus OX=10090 GN=Ddx5 PE=1 SV=2;tr|S4R1I6|S4R1I6_MOUSE MCG2872, isoform CRA_	9	14	14	13	13	14	12	13	14	13	13	14	12	13	14	13	12	13	11	12	13	13	20.5	20.5	18.7	69.265	615	615;614;406;167;182;71;652;650;418	0	100.79	By MS/MS	By MS/MS	By MS/MS	By MS/MS	By MS/MS	By MS/MS	19.2	20.5	16.4	18.2	20.5	18.7
Q61753;F6ZSB7	Q61753;F6ZSB7	7;5	7;5	7;5	D-3-phosphoglycerate dehydrogenase	Phgdh	sp|Q61753|SERA_MOUSE D-3-phosphoglycerate dehydrogenase OS=Mus musculus OX=10090 GN=Phgdh PE=1 SV=3;tr|F6ZSB7|F6ZSB7_MOUSE D-3-phosphoglycerate dehydrogenase (Fragment) OS=Mus musculus OX=10090 GN=Phgdh PE=1 SV=1	2	7	7	7	7	7	7	6	6	7	7	7	7	6	6	7	7	7	7	6	6	7	12.8	12.8	12.8	56.585	533	533;149	0	55.211	By MS/MS	By MS/MS	By MS/MS	By matching	By MS/MS	By MS/MS	12.8	12.8	12.8	11.4	11.4	12.8
Q61768;E9QAK5;P28738;P33175	Q61768	3;1;1;1	3;1;1;1	3;1;1;1	Kinesin-1 heavy chain	Kif5b	sp|Q61768|KINH_MOUSE Kinesin-1 heavy chain OS=Mus musculus OX=10090 GN=Kif5b PE=1 SV=3	4	3	3	3	2	3	2	0	2	1	2	3	2	0	2	1	2	3	2	0	2	1	3.9	3.9	3.9	109.55	963	963;619;956;1027	0	23.736	By MS/MS	By MS/MS	By MS/MS		By matching	By matching	2.4	3.9	2.4	0	2.4	1.1
Q62093	Q62093	3	3	3	Serine/arginine-rich splicing factor 2	Srsf2	sp|Q62093|SRSF2_MOUSE Serine/arginine-rich splicing factor 2 OS=Mus musculus OX=10090 GN=Srsf2 PE=1 SV=4	1	3	3	3	2	2	2	2	2	1	2	2	2	2	2	1	2	2	2	2	2	1	14.9	14.9	14.9	25.476	221	221	0	28.876	By MS/MS	By MS/MS	By MS/MS	By MS/MS	By MS/MS	By matching	11.3	11.3	11.3	11.3	11.3	7.7
Q62167;P16381;Q62095	Q62167;P16381;Q62095	5;4;3	4;3;2	4;3;2	ATP-dependent RNA helicase DDX3X;Putative ATP-dependent RNA helicase Pl10;ATP-dependent RNA helicase DDX3Y	Ddx3x;D1Pas1;Ddx3y	sp|Q62167|DDX3X_MOUSE ATP-dependent RNA helicase DDX3X OS=Mus musculus OX=10090 GN=Ddx3x PE=1 SV=3;sp|P16381|DDX3L_MOUSE Putative ATP-dependent RNA helicase Pl10 OS=Mus musculus OX=10090 GN=D1Pas1 PE=1 SV=1;sp|Q62095|DDX3Y_MOUSE ATP-dependent RNA helicase	3	5	4	4	5	5	5	4	5	4	4	4	4	3	4	4	4	4	4	3	4	4	8.5	6.8	6.8	73.101	662	662;660;658	0	44.987	By MS/MS	By MS/MS	By MS/MS	By matching	By MS/MS	By MS/MS	8.5	8.5	8.5	6.6	8.5	6.8
Q9D8L3;Q62186	Q9D8L3;Q62186	2;2	2;2	2;2	Translocon-associated protein subunit delta	Ssr4	tr|Q9D8L3|Q9D8L3_MOUSE Signal sequence receptor, delta OS=Mus musculus OX=10090 GN=Ssr4 PE=1 SV=1;sp|Q62186|SSRD_MOUSE Translocon-associated protein subunit delta OS=Mus musculus OX=10090 GN=Ssr4 PE=1 SV=1	2	2	2	2	2	2	2	1	1	2	2	2	2	1	1	2	2	2	2	1	1	2	13.3	13.3	13.3	19.007	173	173;172	0	22.154	By MS/MS	By MS/MS	By MS/MS	By matching	By matching	By matching	13.3	13.3	13.3	5.8	5.8	13.3
Q62241	Q62241	1	1	1	U1 small nuclear ribonucleoprotein C	Snrpc	sp|Q62241|RU1C_MOUSE U1 small nuclear ribonucleoprotein C OS=Mus musculus OX=10090 GN=Snrpc PE=1 SV=1	1	1	1	1	1	1	1	1	1	1	1	1	1	1	1	1	1	1	1	1	1	1	5.7	5.7	5.7	17.364	159	159	0	6.6983	By matching	By MS/MS	By MS/MS	By matching	By MS/MS	By MS/MS	5.7	5.7	5.7	5.7	5.7	5.7
Q62261;A0A0A0MQG2	Q62261;A0A0A0MQG2	9;8	9;8	9;8	Spectrin beta chain, non-erythrocytic 1	Sptbn1	sp|Q62261|SPTB2_MOUSE Spectrin beta chain, non-erythrocytic 1 OS=Mus musculus OX=10090 GN=Sptbn1 PE=1 SV=2;tr|A0A0A0MQG2|A0A0A0MQG2_MOUSE Spectrin beta chain, non-erythrocytic 1 (Fragment) OS=Mus musculus OX=10090 GN=Sptbn1 PE=1 SV=1	2	9	9	9	8	7	7	5	8	8	8	7	7	5	8	8	8	7	7	5	8	8	4.3	4.3	4.3	274.22	2363	2363;2092	0	59.519	By MS/MS	By MS/MS	By MS/MS	By matching	By MS/MS	By MS/MS	3.6	3.1	3.2	2.3	3.6	3.9
Q62318	Q62318	6	6	6	Transcription intermediary factor 1-beta	Trim28	sp|Q62318|TIF1B_MOUSE Transcription intermediary factor 1-beta OS=Mus musculus OX=10090 GN=Trim28 PE=1 SV=3	1	6	6	6	5	6	4	3	3	4	5	6	4	3	3	4	5	6	4	3	3	4	7.6	7.6	7.6	88.846	834	834	0	44.856	By MS/MS	By MS/MS	By MS/MS	By matching	By MS/MS	By MS/MS	5.2	7.6	4.2	3.4	3.4	4.3
Q62376;A0A1B0GSX5;A0A1B0GR50;A0A1B0GRR8;A0A1B0GR69;A0A1B0GRV8;A0A1B0GR44	Q62376;A0A1B0GSX5;A0A1B0GR50	8;4;4;3;2;2;2	8;4;4;3;2;2;2	8;4;4;3;2;2;2	U1 small nuclear ribonucleoprotein 70 kDa	Snrnp70	sp|Q62376|RU17_MOUSE U1 small nuclear ribonucleoprotein 70 kDa OS=Mus musculus OX=10090 GN=Snrnp70 PE=1 SV=2;tr|A0A1B0GSX5|A0A1B0GSX5_MOUSE U1 small nuclear ribonucleoprotein 70 kDa (Fragment) OS=Mus musculus OX=10090 GN=Snrnp70 PE=1 SV=1;tr|A0A1B0GR50|A0A	7	8	8	8	7	6	7	8	8	8	7	6	7	8	8	8	7	6	7	8	8	8	17	17	17	51.991	448	448;84;86;168;109;111;116	0	71.833	By MS/MS	By MS/MS	By MS/MS	By matching	By MS/MS	By MS/MS	17	15.4	17	17	17	17
Q63918	Q63918	2	2	2	Serum deprivation-response protein	Sdpr	sp|Q63918|CAVN2_MOUSE Caveolae-associated protein 2 OS=Mus musculus OX=10090 GN=Cavin2 PE=1 SV=3	1	2	2	2	2	2	2	1	2	1	2	2	2	1	2	1	2	2	2	1	2	1	4.8	4.8	4.8	46.763	418	418	0	14.522	By MS/MS	By MS/MS	By MS/MS	By matching	By matching	By matching	4.8	4.8	4.8	2.2	4.8	2.6
Q63ZV0	Q63ZV0	4	4	4	Insulinoma-associated protein 1	Insm1	sp|Q63ZV0|INSM1_MOUSE Insulinoma-associated protein 1 OS=Mus musculus OX=10090 GN=Insm1 PE=1 SV=1	1	4	4	4	3	4	4	0	0	0	3	4	4	0	0	0	3	4	4	0	0	0	9	9	9	54.049	521	521	0	26.802	By MS/MS	By MS/MS	By MS/MS				6.1	9	9	0	0	0
Q64378	Q64378	1	1	1	Peptidyl-prolyl cis-trans isomerase FKBP5;Peptidyl-prolyl cis-trans isomerase FKBP5, N-terminally processed	Fkbp5	sp|Q64378|FKBP5_MOUSE Peptidyl-prolyl cis-trans isomerase FKBP5 OS=Mus musculus OX=10090 GN=Fkbp5 PE=1 SV=1	1	1	1	1	1	1	1	1	1	1	1	1	1	1	1	1	1	1	1	1	1	1	2	2	2	50.966	456	456	0	6.3983	By MS/MS	By matching	By MS/MS	By matching	By matching	By MS/MS	2	2	2	2	2	2
Q64523;Q6GSS7;Q64522	Q64523;Q6GSS7;Q64522	4;4;3	4;4;3	1;1;1	Histone H2A type 2-C;Histone H2A type 2-A;Histone H2A type 2-B	Hist2h2ac;Hist2h2aa1;Hist2h2ab	sp|Q64523|H2A2C_MOUSE Histone H2A type 2-C OS=Mus musculus OX=10090 GN=Hist2h2ac PE=1 SV=3;sp|Q6GSS7|H2A2A_MOUSE Histone H2A type 2-A OS=Mus musculus OX=10090 GN=Hist2h2aa1 PE=1 SV=3;sp|Q64522|H2A2B_MOUSE Histone H2A type 2-B OS=Mus musculus OX=10090 GN=Hi	3	4	4	1	4	3	4	3	4	4	4	3	4	3	4	4	1	1	1	1	1	1	40.3	40.3	22.5	13.988	129	129;130;130	0	89.836	By MS/MS	By MS/MS	By MS/MS	By MS/MS	By MS/MS	By MS/MS	40.3	34.9	40.3	34.9	40.3	40.3
Q6A0D4;D3Z731	Q6A0D4	3;1	3;1	3;1	Raftlin	Rftn1	sp|Q6A0D4|RFTN1_MOUSE Raftlin OS=Mus musculus OX=10090 GN=Rftn1 PE=1 SV=4	2	3	3	3	3	2	2	0	0	0	3	2	2	0	0	0	3	2	2	0	0	0	7.8	7.8	7.8	61.536	554	554;276	0	18.856	By MS/MS	By matching	By MS/MS				7.8	5.4	5.4	0	0	0
Q6GQT9	Q6GQT9	2	2	2	Nodal modulator 1	Nomo1	sp|Q6GQT9|NOMO1_MOUSE Nodal modulator 1 OS=Mus musculus OX=10090 GN=Nomo1 PE=1 SV=1	1	2	2	2	2	2	2	1	1	2	2	2	2	1	1	2	2	2	2	1	1	2	1.7	1.7	1.7	133.42	1214	1214	0	15.318	By MS/MS	By matching	By MS/MS	By matching	By matching	By matching	1.7	1.7	1.7	0.8	0.9	1.7
Q6NVF4;D6RGT6	Q6NVF4;D6RGT6	2;1	2;1	2;1	DNA helicase B	Helb	sp|Q6NVF4|HELB_MOUSE DNA helicase B OS=Mus musculus OX=10090 GN=Helb PE=1 SV=2;tr|D6RGT6|D6RGT6_MOUSE DNA helicase B OS=Mus musculus OX=10090 GN=Helb PE=1 SV=1	2	2	2	2	1	2	2	0	0	0	1	2	2	0	0	0	1	2	2	0	0	0	1.8	1.8	1.8	121.47	1074	1074;571	0	12.517	By MS/MS	By MS/MS	By matching				0.7	1.8	1.8	0	0	0
Q6NWW5;A2BGK7	Q6NWW5	8;2	8;2	8;2	Kinesin-like protein KIF24	Kif24	sp|Q6NWW5|KIF24_MOUSE Kinesin-like protein KIF24 OS=Mus musculus OX=10090 GN=Kif24 PE=1 SV=2	2	8	8	8	6	7	7	0	0	0	6	7	7	0	0	0	6	7	7	0	0	0	6.1	6.1	6.1	150.21	1356	1356;141	0	138.58	By MS/MS	By MS/MS	By MS/MS				4.4	5.5	5	0	0	0
Q6P1F6	Q6P1F6	1	1	1	Serine/threonine-protein phosphatase 2A 55 kDa regulatory subunit B alpha isoform	Ppp2r2a	sp|Q6P1F6|2ABA_MOUSE Serine/threonine-protein phosphatase 2A 55 kDa regulatory subunit B alpha isoform OS=Mus musculus OX=10090 GN=Ppp2r2a PE=1 SV=1	1	1	1	1	1	1	1	1	0	0	1	1	1	1	0	0	1	1	1	1	0	0	1.8	1.8	1.8	51.691	447	447	0.0072993	5.8986	By matching	By MS/MS	By MS/MS	By matching			1.8	1.8	1.8	1.8	0	0
Q6P4T2	Q6P4T2	1	1	1	U5 small nuclear ribonucleoprotein 200 kDa helicase	Snrnp200	sp|Q6P4T2|U520_MOUSE U5 small nuclear ribonucleoprotein 200 kDa helicase OS=Mus musculus OX=10090 GN=Snrnp200 PE=1 SV=1	1	1	1	1	1	1	1	1	1	1	1	1	1	1	1	1	1	1	1	1	1	1	0.5	0.5	0.5	244.54	2136	2136	0	9.774	By MS/MS	By MS/MS	By MS/MS	By matching	By MS/MS	By MS/MS	0.5	0.5	0.5	0.5	0.5	0.5
Q6P542	Q6P542	2	2	2	ATP-binding cassette sub-family F member 1	Abcf1	sp|Q6P542|ABCF1_MOUSE ATP-binding cassette sub-family F member 1 OS=Mus musculus OX=10090 GN=Abcf1 PE=1 SV=1	1	2	2	2	2	2	2	2	2	2	2	2	2	2	2	2	2	2	2	2	2	2	3.5	3.5	3.5	94.944	837	837	0	15.45	By MS/MS	By MS/MS	By MS/MS	By matching	By matching	By matching	3.5	3.5	3.5	3.5	3.5	3.5
Q6P5B0	Q6P5B0	2	2	2	RRP12-like protein	Rrp12	sp|Q6P5B0|RRP12_MOUSE RRP12-like protein OS=Mus musculus OX=10090 GN=Rrp12 PE=1 SV=1	1	2	2	2	2	2	2	0	0	0	2	2	2	0	0	0	2	2	2	0	0	0	1.5	1.5	1.5	143.13	1295	1295	0	11.887	By matching	By MS/MS	By MS/MS				1.5	1.5	1.5	0	0	0
Q6P5D8	Q6P5D8	1	1	1	Structural maintenance of chromosomes flexible hinge domain-containing protein 1	Smchd1	sp|Q6P5D8|SMHD1_MOUSE Structural maintenance of chromosomes flexible hinge domain-containing protein 1 OS=Mus musculus OX=10090 GN=Smchd1 PE=1 SV=2	1	1	1	1	1	0	0	0	0	0	1	0	0	0	0	0	1	0	0	0	0	0	0.8	0.8	0.8	225.65	2007	2007	0	7.3942	By MS/MS						0.8	0	0	0	0	0
Q6P5E4;G3UY73	Q6P5E4;G3UY73	2;1	2;1	2;1	UDP-glucose:glycoprotein glucosyltransferase 1	Uggt1	sp|Q6P5E4|UGGG1_MOUSE UDP-glucose:glycoprotein glucosyltransferase 1 OS=Mus musculus OX=10090 GN=Uggt1 PE=1 SV=4;tr|G3UY73|G3UY73_MOUSE UDP-glucose:glycoprotein glucosyltransferase 1 (Fragment) OS=Mus musculus OX=10090 GN=Uggt1 PE=1 SV=1	2	2	2	2	1	2	1	0	2	1	1	2	1	0	2	1	1	2	1	0	2	1	1.3	1.3	1.3	176.43	1551	1551;47	0	11.388	By matching	By MS/MS	By MS/MS		By matching	By matching	0.6	1.3	0.6	0	1.3	0.6
Q6P8N8;Q9JHS4;F7BB92	Q6P8N8;Q9JHS4	4;4;1	4;4;1	4;4;1	ATP-dependent Clp protease ATP-binding subunit clpX-like, mitochondrial	Clpx	tr|Q6P8N8|Q6P8N8_MOUSE ATP-dependent Clp protease ATP-binding subunit clpX-like, mitochondrial OS=Mus musculus OX=10090 GN=Clpx PE=1 SV=1;sp|Q9JHS4|CLPX_MOUSE ATP-dependent Clp protease ATP-binding subunit clpX-like, mitochondrial OS=Mus musculus OX=10090	3	4	4	4	4	3	4	0	2	3	4	3	4	0	2	3	4	3	4	0	2	3	7.7	7.7	7.7	67.335	620	620;634;192	0	35.073	By MS/MS	By MS/MS	By MS/MS		By matching	By matching	7.7	6.1	7.7	0	3.7	5.5
Q6P9Q4	Q6P9Q4	2	2	2	FH1/FH2 domain-containing protein 1	Fhod1	sp|Q6P9Q4|FHOD1_MOUSE FH1/FH2 domain-containing protein 1 OS=Mus musculus OX=10090 GN=Fhod1 PE=1 SV=3	1	2	2	2	2	2	2	0	0	0	2	2	2	0	0	0	2	2	2	0	0	0	2.6	2.6	2.6	129.6	1197	1197	0	14.646	By matching	By matching	By MS/MS				2.6	2.6	2.6	0	0	0
Q6PAL7	Q6PAL7	1	1	1	AT-hook DNA-binding motif-containing protein 1	Ahdc1	sp|Q6PAL7|AHDC1_MOUSE AT-hook DNA-binding motif-containing protein 1 OS=Mus musculus OX=10090 GN=Ahdc1 PE=1 SV=1	1	1	1	1	0	1	1	0	0	0	0	1	1	0	0	0	0	1	1	0	0	0	0.9	0.9	0.9	168.08	1594	1594	0	14.075		By MS/MS	By MS/MS				0	0.9	0.9	0	0	0
Q6PB66	Q6PB66	3	3	3	Leucine-rich PPR motif-containing protein, mitochondrial	Lrpprc	sp|Q6PB66|LPPRC_MOUSE Leucine-rich PPR motif-containing protein, mitochondrial OS=Mus musculus OX=10090 GN=Lrpprc PE=1 SV=2	1	3	3	3	3	3	2	1	2	1	3	3	2	1	2	1	3	3	2	1	2	1	1.9	1.9	1.9	156.61	1392	1392	0	17.931	By MS/MS	By MS/MS	By MS/MS	By matching	By matching	By matching	1.9	1.9	1.9	0.8	1.9	0.8
Q6PCN7;E9PVX5;G3UVU1	Q6PCN7;E9PVX5;G3UVU1	2;1;1	2;1;1	2;1;1	Helicase-like transcription factor	Hltf	sp|Q6PCN7|HLTF_MOUSE Helicase-like transcription factor OS=Mus musculus OX=10090 GN=Hltf PE=1 SV=1;tr|E9PVX5|E9PVX5_MOUSE Helicase-like transcription factor OS=Mus musculus OX=10090 GN=Hltf PE=1 SV=1;tr|G3UVU1|G3UVU1_MOUSE Helicase-like transcription facto	3	2	2	2	1	1	1	1	1	1	1	1	1	1	1	1	1	1	1	1	1	1	1.7	1.7	1.7	113.32	1003	1003;566;628	0	12.466	By MS/MS	By MS/MS	By MS/MS	By matching	By matching	By MS/MS	1	1	1	0.7	0.7	0.7
Q6PDY2	Q6PDY2	1	1	1	2-aminoethanethiol dioxygenase	Ado	sp|Q6PDY2|AEDO_MOUSE 2-aminoethanethiol dioxygenase OS=Mus musculus OX=10090 GN=Ado PE=1 SV=2	1	1	1	1	0	1	0	0	0	0	0	1	0	0	0	0	0	1	0	0	0	0	3.5	3.5	3.5	28.372	256	256	0	6.2565		By MS/MS					0	3.5	0	0	0	0
Z4YJT3;Q6ZQ58	Z4YJT3;Q6ZQ58	4;4	4;4	4;4	La-related protein 1	Larp1	tr|Z4YJT3|Z4YJT3_MOUSE La-related protein 1 OS=Mus musculus OX=10090 GN=Larp1 PE=1 SV=1;sp|Q6ZQ58|LARP1_MOUSE La-related protein 1 OS=Mus musculus OX=10090 GN=Larp1 PE=1 SV=3	2	4	4	4	2	3	3	2	3	3	2	3	3	2	3	3	2	3	3	2	3	3	4.9	4.9	4.9	121.15	1072	1072;1072	0	31.864	By matching	By MS/MS	By MS/MS	By matching	By MS/MS	By matching	2.6	3.8	3.7	2.6	3.7	3.7
Q6ZQ73	Q6ZQ73	2	2	2	Cullin-associated NEDD8-dissociated protein 2	Cand2	sp|Q6ZQ73|CAND2_MOUSE Cullin-associated NEDD8-dissociated protein 2 OS=Mus musculus OX=10090 GN=Cand2 PE=1 SV=2	1	2	2	2	2	2	2	0	0	0	2	2	2	0	0	0	2	2	2	0	0	0	1.9	1.9	1.9	135.63	1235	1235	0	11.934	By matching	By MS/MS	By MS/MS				1.9	1.9	1.9	0	0	0
Q6ZQI3	Q6ZQI3	1	1	1	Malectin	Mlec	sp|Q6ZQI3|MLEC_MOUSE Malectin OS=Mus musculus OX=10090 GN=Mlec PE=1 SV=2	1	1	1	1	1	1	1	1	1	1	1	1	1	1	1	1	1	1	1	1	1	1	4.5	4.5	4.5	32.342	291	291	0.0011641	6.167	By matching	By MS/MS	By MS/MS	By matching	By matching	By MS/MS	4.5	4.5	4.5	4.5	4.5	4.5
Q6ZWN5;F7CJS8;D3YWH9;Q9CXW7;D3YUV6;D3Z673	Q6ZWN5;F7CJS8;D3YWH9;Q9CXW7	5;4;4;4;2;2	5;4;4;4;2;2	5;4;4;4;2;2	40S ribosomal protein S9	Rps9	sp|Q6ZWN5|RS9_MOUSE 40S ribosomal protein S9 OS=Mus musculus OX=10090 GN=Rps9 PE=1 SV=3;tr|F7CJS8|F7CJS8_MOUSE 40S ribosomal protein S9 (Fragment) OS=Mus musculus OX=10090 GN=Rps9 PE=1 SV=1;tr|D3YWH9|D3YWH9_MOUSE 40S ribosomal protein S9 OS=Mus musculus OX	6	5	5	5	5	5	4	3	5	4	5	5	4	3	5	4	5	5	4	3	5	4	24.7	24.7	24.7	22.591	194	194;135;136;139;57;79	0	47.215	By MS/MS	By MS/MS	By MS/MS	By matching	By MS/MS	By MS/MS	24.7	24.7	20.6	12.9	24.7	17
Q6ZWV7	Q6ZWV7	1	1	1	60S ribosomal protein L35	Rpl35	sp|Q6ZWV7|RL35_MOUSE 60S ribosomal protein L35 OS=Mus musculus OX=10090 GN=Rpl35 PE=1 SV=1	1	1	1	1	1	1	1	1	1	1	1	1	1	1	1	1	1	1	1	1	1	1	8.1	8.1	8.1	14.552	123	123	0	6.685	By MS/MS	By MS/MS	By matching	By matching	By MS/MS	By matching	8.1	8.1	8.1	8.1	8.1	8.1
Q6ZWX6	Q6ZWX6	3	3	3	Eukaryotic translation initiation factor 2 subunit 1	Eif2s1	sp|Q6ZWX6|IF2A_MOUSE Eukaryotic translation initiation factor 2 subunit 1 OS=Mus musculus OX=10090 GN=Eif2s1 PE=1 SV=3	1	3	3	3	2	3	3	1	3	1	2	3	3	1	3	1	2	3	3	1	3	1	12.4	12.4	12.4	36.108	315	315	0	41.051	By matching	By MS/MS	By MS/MS	By MS/MS	By MS/MS	By MS/MS	7	12.4	12.4	3.8	12.4	3.8
Q6ZWZ7;Q9CPR4;B2RY53	Q6ZWZ7;Q9CPR4	3;3;1	3;3;1	3;3;1	60S ribosomal protein L17	Rpl17	tr|Q6ZWZ7|Q6ZWZ7_MOUSE 60S ribosomal protein L17 OS=Mus musculus OX=10090 GN=Rpl17 PE=1 SV=1;sp|Q9CPR4|RL17_MOUSE 60S ribosomal protein L17 OS=Mus musculus OX=10090 GN=Rpl17 PE=1 SV=3	3	3	3	3	3	3	3	3	3	3	3	3	3	3	3	3	3	3	3	3	3	3	17.9	17.9	17.9	21.397	184	184;184;190	0	22.397	By MS/MS	By MS/MS	By MS/MS	By matching	By MS/MS	By MS/MS	17.9	17.9	17.9	17.9	17.9	17.9
Q76HL1	Q76HL1	1	1	1		Prss43	tr|Q76HL1|Q76HL1_MOUSE Protease, serine 43 OS=Mus musculus OX=10090 GN=Prss43 PE=2 SV=1	1	1	1	1	1	1	1	0	0	0	1	1	1	0	0	0	1	1	1	0	0	0	2.4	2.4	2.4	42.203	382	382	0	6.8264	By MS/MS	By matching	By MS/MS				2.4	2.4	2.4	0	0	0
Q76MZ3	Q76MZ3	2	2	2	Serine/threonine-protein phosphatase 2A 65 kDa regulatory subunit A alpha isoform	Ppp2r1a	sp|Q76MZ3|2AAA_MOUSE Serine/threonine-protein phosphatase 2A 65 kDa regulatory subunit A alpha isoform OS=Mus musculus OX=10090 GN=Ppp2r1a PE=1 SV=3	1	2	2	2	2	2	2	2	2	2	2	2	2	2	2	2	2	2	2	2	2	2	3.4	3.4	3.4	65.322	589	589	0	15.407	By MS/MS	By MS/MS	By MS/MS	By matching	By matching	By matching	3.4	3.4	3.4	3.4	3.4	3.4
Q78IK2	Q78IK2	2	2	2	Up-regulated during skeletal muscle growth protein 5	Usmg5	sp|Q78IK2|USMG5_MOUSE Up-regulated during skeletal muscle growth protein 5 OS=Mus musculus OX=10090 GN=Usmg5 PE=1 SV=1	1	2	2	2	2	2	2	0	2	1	2	2	2	0	2	1	2	2	2	0	2	1	27.6	27.6	27.6	6.3814	58	58	0	16.044	By matching	By MS/MS	By MS/MS		By matching	By matching	27.6	27.6	27.6	0	27.6	25.9
Q7TMM9	Q7TMM9	11	2	1	Tubulin beta-2A chain	Tubb2a	sp|Q7TMM9|TBB2A_MOUSE Tubulin beta-2A chain OS=Mus musculus OX=10090 GN=Tubb2a PE=1 SV=1	1	11	2	1	9	11	10	5	10	8	2	2	2	0	2	2	1	1	1	0	1	1	21.1	5.4	2.7	49.906	445	445	0	23.486	By MS/MS	By MS/MS	By MS/MS	By matching	By matching	By matching	18.9	21.1	21.1	9.9	21.1	17.5
Q7TNC4;E9Q715;Q05CX5;D3YZ82	Q7TNC4;E9Q715;Q05CX5	6;5;5;1	6;5;5;1	4;3;3;0	Putative RNA-binding protein Luc7-like 2	Luc7l2	sp|Q7TNC4|LC7L2_MOUSE Putative RNA-binding protein Luc7-like 2 OS=Mus musculus OX=10090 GN=Luc7l2 PE=1 SV=1;tr|E9Q715|E9Q715_MOUSE Putative RNA-binding protein Luc7-like 2 OS=Mus musculus OX=10090 GN=Luc7l2 PE=1 SV=1;tr|Q05CX5|Q05CX5_MOUSE Luc7l2 protein O	4	6	6	4	6	5	4	5	6	6	6	5	4	5	6	6	4	3	3	3	4	4	16.8	16.8	12.2	46.582	392	392;272;339;69	0	58.115	By MS/MS	By MS/MS	By MS/MS	By matching	By MS/MS	By MS/MS	16.8	13	11	13	16.8	16.8
Q7TPD2	Q7TPD2	1	1	1	Protein FAM185A	Fam185a	sp|Q7TPD2|F185A_MOUSE Protein FAM185A OS=Mus musculus OX=10090 GN=Fam185a PE=2 SV=1	1	1	1	1	1	1	1	0	0	0	1	1	1	0	0	0	1	1	1	0	0	0	3.7	3.7	3.7	39.992	378	378	0.0033975	6.0943	By MS/MS	By MS/MS	By MS/MS				3.7	3.7	3.7	0	0	0
Q7TPV4	Q7TPV4	18	18	18	Myb-binding protein 1A	Mybbp1a	sp|Q7TPV4|MBB1A_MOUSE Myb-binding protein 1A OS=Mus musculus OX=10090 GN=Mybbp1a PE=1 SV=2	1	18	18	18	15	18	17	11	14	14	15	18	17	11	14	14	15	18	17	11	14	14	14.1	14.1	14.1	152.04	1344	1344	0	238.46	By MS/MS	By MS/MS	By MS/MS	By MS/MS	By MS/MS	By MS/MS	12	14.1	13.2	10.6	12.9	12.9
Q7TQE6	Q7TQE6	3	3	3	Macoilin	Tmem57	sp|Q7TQE6|MACOI_MOUSE Macoilin OS=Mus musculus OX=10090 GN=Maco1 PE=1 SV=1	1	3	3	3	3	3	3	0	0	1	3	3	3	0	0	1	3	3	3	0	0	1	4.7	4.7	4.7	76.088	664	664	0	21.311	By MS/MS	By MS/MS	By MS/MS			By matching	4.7	4.7	4.7	0	0	1.7
Q7TSG3	Q7TSG3	1	1	1	F-box only protein 5	Fbxo5	sp|Q7TSG3|FBX5_MOUSE F-box only protein 5 OS=Mus musculus OX=10090 GN=Fbxo5 PE=1 SV=1	1	1	1	1	1	0	1	0	0	0	1	0	1	0	0	0	1	0	1	0	0	0	4.3	4.3	4.3	47.508	421	421	0.0011628	6.1613	By matching		By MS/MS				4.3	0	4.3	0	0	0
Q7TSH4;A0A140LJ44;A0A140LIP6	Q7TSH4;A0A140LJ44	7;5;2	7;5;2	7;5;2	Centriolar coiled-coil protein of 110 kDa	Ccp110	sp|Q7TSH4|CP110_MOUSE Centriolar coiled-coil protein of 110 kDa OS=Mus musculus OX=10090 GN=Ccp110 PE=1 SV=1;tr|A0A140LJ44|A0A140LJ44_MOUSE Centriolar coiled-coil protein of 110 kDa (Fragment) OS=Mus musculus OX=10090 GN=Ccp110 PE=1 SV=1	3	7	7	7	6	7	7	0	1	1	6	7	7	0	1	1	6	7	7	0	1	1	8.7	8.7	8.7	111.14	1004	1004;796;184	0	57.376	By MS/MS	By MS/MS	By MS/MS		By matching	By matching	7.6	8.7	8.7	0	1.2	1.2
Q7TSI3	Q7TSI3	1	1	1	Serine/threonine-protein phosphatase 6 regulatory subunit 1	Ppp6r1	sp|Q7TSI3|PP6R1_MOUSE Serine/threonine-protein phosphatase 6 regulatory subunit 1 OS=Mus musculus OX=10090 GN=Ppp6r1 PE=1 SV=1	1	1	1	1	1	1	1	0	1	1	1	1	1	0	1	1	1	1	1	0	1	1	1.3	1.3	1.3	94.526	856	856	0	6.8037	By MS/MS	By MS/MS	By MS/MS		By matching	By matching	1.3	1.3	1.3	0	1.3	1.3
Q7TT37	Q7TT37	2	2	2	Elongator complex protein 1	Ikbkap	sp|Q7TT37|ELP1_MOUSE Elongator complex protein 1 OS=Mus musculus OX=10090 GN=Elp1 PE=1 SV=2	1	2	2	2	1	2	2	0	0	0	1	2	2	0	0	0	1	2	2	0	0	0	1.7	1.7	1.7	149.58	1333	1333	0	18.346	By MS/MS	By MS/MS	By MS/MS				0.8	1.7	1.7	0	0	0
Q80SZ7	Q80SZ7	1	1	1	Guanine nucleotide-binding protein G(I)/G(S)/G(O) subunit gamma-5	Gng5	sp|Q80SZ7|GBG5_MOUSE Guanine nucleotide-binding protein G(I)/G(S)/G(O) subunit gamma-5 OS=Mus musculus OX=10090 GN=Gng5 PE=1 SV=2	1	1	1	1	0	1	1	1	0	1	0	1	1	1	0	1	0	1	1	1	0	1	16.2	16.2	16.2	7.3184	68	68	0	7.2591		By matching	By MS/MS	By matching		By matching	0	16.2	16.2	16.2	0	16.2
V9GWX3;Q80TE0	V9GWX3;Q80TE0	2;2	2;2	2;2	RNA polymerase II-associated protein 1	Rpap1	tr|V9GWX3|V9GWX3_MOUSE RNA polymerase II-associated protein 1 OS=Mus musculus OX=10090 GN=Rpap1 PE=1 SV=1;sp|Q80TE0|RPAP1_MOUSE RNA polymerase II-associated protein 1 OS=Mus musculus OX=10090 GN=Rpap1 PE=1 SV=2	2	2	2	2	2	2	2	0	0	0	2	2	2	0	0	0	2	2	2	0	0	0	3	3	3	96.382	869	869;1409	0	20.017	By MS/MS	By MS/MS	By MS/MS				3	3	3	0	0	0
Q80TM9	Q80TM9	1	1	1	Nischarin	Nisch	sp|Q80TM9|NISCH_MOUSE Nischarin OS=Mus musculus OX=10090 GN=Nisch PE=1 SV=2	1	1	1	1	1	1	1	0	0	1	1	1	1	0	0	1	1	1	1	0	0	1	0.7	0.7	0.7	175.01	1593	1593	0	7.3056	By matching	By matching	By MS/MS			By matching	0.7	0.7	0.7	0	0	0.7
Q80UM7	Q80UM7	3	3	3	Mannosyl-oligosaccharide glucosidase	Mogs	sp|Q80UM7|MOGS_MOUSE Mannosyl-oligosaccharide glucosidase OS=Mus musculus OX=10090 GN=Mogs PE=1 SV=1	1	3	3	3	3	3	3	0	1	1	3	3	3	0	1	1	3	3	3	0	1	1	3.8	3.8	3.8	91.83	834	834	0	23.772	By MS/MS	By MS/MS	By MS/MS		By matching	By matching	3.8	3.8	3.8	0	1.4	1.4
Q80UU9	Q80UU9	2	2	2	Membrane-associated progesterone receptor component 2	Pgrmc2	sp|Q80UU9|PGRC2_MOUSE Membrane-associated progesterone receptor component 2 OS=Mus musculus OX=10090 GN=Pgrmc2 PE=1 SV=2	1	2	2	2	2	2	2	2	2	2	2	2	2	2	2	2	2	2	2	2	2	2	15.2	15.2	15.2	23.334	217	217	0	53.879	By MS/MS	By MS/MS	By MS/MS	By matching	By MS/MS	By MS/MS	15.2	15.2	15.2	15.2	15.2	15.2
Q80VY9	Q80VY9	1	1	1	Putative ATP-dependent RNA helicase DHX33	Dhx33	sp|Q80VY9|DHX33_MOUSE ATP-dependent RNA helicase DHX33 OS=Mus musculus OX=10090 GN=Dhx33 PE=1 SV=1	1	1	1	1	1	1	1	0	0	0	1	1	1	0	0	0	1	1	1	0	0	0	2.1	2.1	2.1	78.346	698	698	0	6.4959	By matching	By MS/MS	By matching				2.1	2.1	2.1	0	0	0
Q80ZK9;A2AE98	Q80ZK9;A2AE98	2;1	2;1	2;1	WD and tetratricopeptide repeats protein 1	Wdtc1	sp|Q80ZK9|WDTC1_MOUSE WD and tetratricopeptide repeats protein 1 OS=Mus musculus OX=10090 GN=Wdtc1 PE=1 SV=1;tr|A2AE98|A2AE98_MOUSE WD and tetratricopeptide repeats protein 1 OS=Mus musculus OX=10090 GN=Wdtc1 PE=1 SV=1	2	2	2	2	2	2	2	0	1	0	2	2	2	0	1	0	2	2	2	0	1	0	3.5	3.5	3.5	75.732	677	677;615	0	16.071	By MS/MS	By MS/MS	By MS/MS		By matching		3.5	3.5	3.5	0	1.5	0
Q80ZM5	Q80ZM5	3	3	3		H1fx	tr|Q80ZM5|Q80ZM5_MOUSE H1 histone family, member X OS=Mus musculus OX=10090 GN=H1fx PE=1 SV=1	1	3	3	3	3	2	3	0	2	3	3	2	3	0	2	3	3	2	3	0	2	3	18.1	18.1	18.1	20.151	188	188	0	21.72	By matching	By MS/MS	By MS/MS		By matching	By MS/MS	18.1	12.2	18.1	0	12.2	18.1
Q80ZW2	Q80ZW2	4	4	4	Protein THEM6	Them6	sp|Q80ZW2|THEM6_MOUSE Protein THEM6 OS=Mus musculus OX=10090 GN=Them6 PE=1 SV=1	1	4	4	4	3	3	2	2	2	1	3	3	2	2	2	1	3	3	2	2	2	1	14.5	14.5	14.5	23.802	207	207	0	114.78	By MS/MS	By MS/MS	By MS/MS	By matching	By matching	By matching	10.1	14.5	5.3	5.3	5.3	3.9
Q80ZX0	Q80ZX0	1	1	1		Sec24b	tr|Q80ZX0|Q80ZX0_MOUSE Sec24-related gene family, member B (S. cerevisiae) OS=Mus musculus OX=10090 GN=Sec24b PE=1 SV=1	1	1	1	1	1	1	1	1	1	1	1	1	1	1	1	1	1	1	1	1	1	1	1.1	1.1	1.1	135.55	1251	1251	0.0082305	5.8584	By matching	By MS/MS	By matching	By matching	By matching	By matching	1.1	1.1	1.1	1.1	1.1	1.1
Q8BFR5;A0A0U1RPC4;A0A0U1RNQ6	Q8BFR5	9;2;2	9;2;2	9;2;2	Elongation factor Tu, mitochondrial	Tufm	sp|Q8BFR5|EFTU_MOUSE Elongation factor Tu, mitochondrial OS=Mus musculus OX=10090 GN=Tufm PE=1 SV=1	3	9	9	9	9	8	9	6	9	8	9	8	9	6	9	8	9	8	9	6	9	8	17.7	17.7	17.7	49.508	452	452;116;118	0	109.54	By MS/MS	By MS/MS	By MS/MS	By matching	By MS/MS	By MS/MS	17.7	15.5	17.7	12.6	17.7	16.2
Q8BGJ5;Q922I7;Q8CB58;P17225;E9Q0W3;E9PZ39;G3UXZ8;E9QMW9;G3UZ01;G8JL74;G3UXA6;Q8BHD7	Q8BGJ5;Q922I7;Q8CB58;P17225	4;4;3;3;1;1;1;1;1;1;1;1	4;4;3;3;1;1;1;1;1;1;1;1	4;4;3;3;1;1;1;1;1;1;1;1	Polypyrimidine tract-binding protein 1	Ptbp1	tr|Q8BGJ5|Q8BGJ5_MOUSE MCG13402, isoform CRA_a OS=Mus musculus OX=10090 GN=Ptbp1 PE=1 SV=1;tr|Q922I7|Q922I7_MOUSE MCG13402, isoform CRA_c OS=Mus musculus OX=10090 GN=Ptbp1 PE=1 SV=1;tr|Q8CB58|Q8CB58_MOUSE MCG13402, isoform CRA_d OS=Mus musculus OX=10090 GN	12	4	4	4	4	4	4	3	3	1	4	4	4	3	3	1	4	4	4	3	3	1	7	7	7	56.891	529	529;555;489;527;55;113;188;353;457;551;554;523	0	30.084	By MS/MS	By MS/MS	By MS/MS	By matching	By MS/MS	By MS/MS	7	7	7	5.3	5.3	1.9
Q8BGQ7	Q8BGQ7	5	5	5	Alanine--tRNA ligase, cytoplasmic	Aars	sp|Q8BGQ7|SYAC_MOUSE Alanine--tRNA ligase, cytoplasmic OS=Mus musculus OX=10090 GN=Aars PE=1 SV=1	1	5	5	5	4	4	5	3	5	5	4	4	5	3	5	5	4	4	5	3	5	5	5.2	5.2	5.2	106.91	968	968	0	30.002	By MS/MS	By MS/MS	By MS/MS	By matching	By MS/MS	By MS/MS	4.3	4.3	5.2	2.8	5.2	5.2
Q8BGT5;D6RFQ8	Q8BGT5;D6RFQ8	3;2	3;2	3;2	Alanine aminotransferase 2	Gpt2	sp|Q8BGT5|ALAT2_MOUSE Alanine aminotransferase 2 OS=Mus musculus OX=10090 GN=Gpt2 PE=1 SV=1;tr|D6RFQ8|D6RFQ8_MOUSE Alanine aminotransferase 2 OS=Mus musculus OX=10090 GN=Gpt2 PE=1 SV=1	2	3	3	3	3	1	2	1	1	1	3	1	2	1	1	1	3	1	2	1	1	1	4.8	4.8	4.8	57.943	522	522;158	0	18.532	By MS/MS	By matching	By MS/MS	By matching	By matching	By matching	4.8	1.5	3.3	1.5	1.5	1.5
Q8BH59;V9GXX9	Q8BH59	3;1	3;1	3;1	Calcium-binding mitochondrial carrier protein Aralar1	Slc25a12	sp|Q8BH59|CMC1_MOUSE Calcium-binding mitochondrial carrier protein Aralar1 OS=Mus musculus OX=10090 GN=Slc25a12 PE=1 SV=1	2	3	3	3	3	3	3	0	3	2	3	3	3	0	3	2	3	3	3	0	3	2	5.2	5.2	5.2	74.569	677	677;87	0	26.927	By MS/MS	By MS/MS	By MS/MS		By matching	By matching	5.2	5.2	5.2	0	5.2	3.7
Q8BH80;Q9QY76	Q8BH80;Q9QY76	2;2	2;2	2;2	Vesicle-associated membrane protein-associated protein B	Vapb	tr|Q8BH80|Q8BH80_MOUSE Vesicle-associated membrane protein, associated protein B and C OS=Mus musculus OX=10090 GN=Vapb PE=1 SV=1;sp|Q9QY76|VAPB_MOUSE Vesicle-associated membrane protein-associated protein B OS=Mus musculus OX=10090 GN=Vapb PE=1 SV=3	2	2	2	2	2	1	2	1	2	1	2	1	2	1	2	1	2	1	2	1	2	1	6.6	6.6	6.6	26.918	243	243;243	0	11.9	By MS/MS	By MS/MS	By MS/MS	By matching	By matching	By matching	6.6	3.7	6.6	3.7	6.6	3.7
Q8BHE8	Q8BHE8	1	1	1	Uncharacterized protein C2orf47 homolog, mitochondrial		sp|Q8BHE8|MAIP1_MOUSE m-AAA protease-interacting protein 1, mitochondrial OS=Mus musculus OX=10090 GN=Maip1 PE=1 SV=1	1	1	1	1	1	1	1	0	0	1	1	1	1	0	0	1	1	1	1	0	0	1	3.1	3.1	3.1	32.985	291	291	0	6.4252	By matching	By matching	By MS/MS			By matching	3.1	3.1	3.1	0	0	3.1
Q8BI72	Q8BI72	2	2	2	CDKN2A-interacting protein	Cdkn2aip	sp|Q8BI72|CARF_MOUSE CDKN2A-interacting protein OS=Mus musculus OX=10090 GN=Cdkn2aip PE=1 SV=1	1	2	2	2	2	2	2	2	2	2	2	2	2	2	2	2	2	2	2	2	2	2	4.8	4.8	4.8	59.744	563	563	0	12.912	By MS/MS	By MS/MS	By MS/MS	By matching	By matching	By MS/MS	4.8	4.8	4.8	4.8	4.8	4.8
Q8BI84	Q8BI84	1	1	1	Melanoma inhibitory activity protein 3	Mia3	sp|Q8BI84|TGO1_MOUSE Transport and Golgi organization protein 1 homolog OS=Mus musculus OX=10090 GN=Mia3 PE=1 SV=2	1	1	1	1	1	1	1	0	0	1	1	1	1	0	0	1	1	1	1	0	0	1	0.7	0.7	0.7	213.67	1930	1930	0	6.7035	By matching	By MS/MS	By MS/MS			By matching	0.7	0.7	0.7	0	0	0.7
Q8BJ71	Q8BJ71	1	1	1	Nuclear pore complex protein Nup93	Nup93	sp|Q8BJ71|NUP93_MOUSE Nuclear pore complex protein Nup93 OS=Mus musculus OX=10090 GN=Nup93 PE=1 SV=1	1	1	1	1	1	1	1	1	1	1	1	1	1	1	1	1	1	1	1	1	1	1	1.3	1.3	1.3	93.28	819	819	0	10.736	By MS/MS	By MS/MS	By MS/MS	By matching	By matching	By matching	1.3	1.3	1.3	1.3	1.3	1.3
Q8BJW6	Q8BJW6	1	1	1	Eukaryotic translation initiation factor 2A;Eukaryotic translation initiation factor 2A, N-terminally processed	Eif2a	sp|Q8BJW6|EIF2A_MOUSE Eukaryotic translation initiation factor 2A OS=Mus musculus OX=10090 GN=Eif2a PE=1 SV=2	1	1	1	1	1	1	1	1	1	1	1	1	1	1	1	1	1	1	1	1	1	1	2.4	2.4	2.4	64.403	581	581	0	6.8255	By matching	By MS/MS	By MS/MS	By matching	By matching	By matching	2.4	2.4	2.4	2.4	2.4	2.4
Q8BK64	Q8BK64	2	2	2	Activator of 90 kDa heat shock protein ATPase homolog 1	Ahsa1	sp|Q8BK64|AHSA1_MOUSE Activator of 90 kDa heat shock protein ATPase homolog 1 OS=Mus musculus OX=10090 GN=Ahsa1 PE=1 SV=2	1	2	2	2	2	2	2	1	2	1	2	2	2	1	2	1	2	2	2	1	2	1	5	5	5	38.117	338	338	0	11.683	By MS/MS	By MS/MS	By MS/MS	By matching	By matching	By matching	5	5	5	2.7	5	2.7
Q8BK67;A2AWQ2	Q8BK67;A2AWQ2	5;3	5;3	5;3	Protein RCC2	Rcc2	sp|Q8BK67|RCC2_MOUSE Protein RCC2 OS=Mus musculus OX=10090 GN=Rcc2 PE=1 SV=1;tr|A2AWQ2|A2AWQ2_MOUSE Protein RCC2 (Fragment) OS=Mus musculus OX=10090 GN=Rcc2 PE=1 SV=1	2	5	5	5	4	5	5	3	5	4	4	5	5	3	5	4	4	5	5	3	5	4	9.2	9.2	9.2	55.983	520	520;170	0	52.475	By MS/MS	By MS/MS	By MS/MS	By MS/MS	By MS/MS	By MS/MS	8.8	9.2	9.2	4.6	9.2	8.8
Q8BL97	Q8BL97	3	3	3	Serine/arginine-rich splicing factor 7	Srsf7	sp|Q8BL97|SRSF7_MOUSE Serine/arginine-rich splicing factor 7 OS=Mus musculus OX=10090 GN=Srsf7 PE=1 SV=1	1	3	3	3	2	3	2	2	2	2	2	3	2	2	2	2	2	3	2	2	2	2	9.7	9.7	9.7	30.817	267	267	0	39.943	By matching	By MS/MS	By MS/MS	By matching	By MS/MS	By MS/MS	7.9	9.7	7.9	7.9	7.9	7.9
Q8BMK4	Q8BMK4	10	10	10	Cytoskeleton-associated protein 4	Ckap4	sp|Q8BMK4|CKAP4_MOUSE Cytoskeleton-associated protein 4 OS=Mus musculus OX=10090 GN=Ckap4 PE=1 SV=2	1	10	10	10	7	10	9	8	10	9	7	10	9	8	10	9	7	10	9	8	10	9	18.6	18.6	18.6	63.691	575	575	0	72.352	By MS/MS	By MS/MS	By MS/MS	By MS/MS	By MS/MS	By MS/MS	13.9	18.6	15.8	13.7	18.6	15.8
Q8BMQ2	Q8BMQ2	1	1	1	General transcription factor 3C polypeptide 4	Gtf3c4	sp|Q8BMQ2|TF3C4_MOUSE General transcription factor 3C polypeptide 4 OS=Mus musculus OX=10090 GN=Gtf3c4 PE=1 SV=2	1	1	1	1	1	1	1	1	1	1	1	1	1	1	1	1	1	1	1	1	1	1	1.3	1.3	1.3	91.612	817	817	0	9.1282	By MS/MS	By MS/MS	By MS/MS	By matching	By matching	By matching	1.3	1.3	1.3	1.3	1.3	1.3
Q8BMS1	Q8BMS1	9	9	9	Trifunctional enzyme subunit alpha, mitochondrial;Long-chain enoyl-CoA hydratase;Long chain 3-hydroxyacyl-CoA dehydrogenase	Hadha	sp|Q8BMS1|ECHA_MOUSE Trifunctional enzyme subunit alpha, mitochondrial OS=Mus musculus OX=10090 GN=Hadha PE=1 SV=1	1	9	9	9	7	9	8	3	6	4	7	9	8	3	6	4	7	9	8	3	6	4	11.7	11.7	11.7	82.669	763	763	0	76.052	By MS/MS	By MS/MS	By MS/MS	By matching	By matching	By matching	9	11.7	11.1	4.3	8.8	5.4
Q8BP47	Q8BP47	3	3	3	Asparagine--tRNA ligase, cytoplasmic	Nars	sp|Q8BP47|SYNC_MOUSE Asparagine--tRNA ligase, cytoplasmic OS=Mus musculus OX=10090 GN=Nars PE=1 SV=2	1	3	3	3	3	2	3	1	1	2	3	2	3	1	1	2	3	2	3	1	1	2	2.7	2.7	2.7	64.279	559	559	0	17.891	By MS/MS	By MS/MS	By MS/MS	By matching	By matching	By matching	2.7	1.4	2.7	1.3	1.3	2.5
Q8BP67;F6RSK3	Q8BP67;F6RSK3	3;2	3;2	3;2	60S ribosomal protein L24	Rpl24;Gm17430	sp|Q8BP67|RL24_MOUSE 60S ribosomal protein L24 OS=Mus musculus OX=10090 GN=Rpl24 PE=1 SV=2;tr|F6RSK3|F6RSK3_MOUSE Uncharacterized protein OS=Mus musculus OX=10090 GN=Gm17430 PE=4 SV=1	2	3	3	3	3	3	3	1	3	2	3	3	3	1	3	2	3	3	3	1	3	2	17.8	17.8	17.8	17.779	157	157;157	0	22.566	By MS/MS	By MS/MS	By MS/MS	By matching	By MS/MS	By MS/MS	17.8	17.8	17.8	8.3	17.8	9.6
Q8BP71;B7ZC11;A0A2I3BR20;A0A2I3BRA9;A0A2R8W6K5;A0A2I3BRU6;A0A2K6EDK7;A0A2R8VI79;A0A2R8VK79;Q8BIF2;Q9JJ43	Q8BP71;B7ZC11;A0A2I3BR20;A0A2I3BRA9;A0A2R8W6K5;A0A2I3BRU6;A0A2K6EDK7;A0A2R8VI79;A0A2R8VK79;Q8BIF2;Q9JJ43	2;1;1;1;1;1;1;1;1;1;1	2;1;1;1;1;1;1;1;1;1;1	2;1;1;1;1;1;1;1;1;1;1	RNA binding protein fox-1 homolog 2;RNA binding protein fox-1 homolog 3;RNA binding protein fox-1 homolog 1	Rbfox2;Rbfox3;Rbfox1	sp|Q8BP71|RFOX2_MOUSE RNA binding protein fox-1 homolog 2 OS=Mus musculus OX=10090 GN=Rbfox2 PE=1 SV=2;tr|B7ZC11|B7ZC11_MOUSE RNA-binding protein fox-1 homolog 3 (Fragment) OS=Mus musculus OX=10090 GN=Rbfox3 PE=1 SV=1;tr|A0A2I3BR20|A0A2I3BR20_MOUSE RNA-bin	11	2	2	2	0	2	1	2	0	1	0	2	1	2	0	1	0	2	1	2	0	1	6.7	6.7	6.7	47.33	449	449;145;201;275;289;300;349;358;396;374;396	0	15.91		By MS/MS	By matching	By matching		By matching	0	6.7	2.2	6.7	0	2.2
Q8BPM0;Q80U19	Q8BPM0	3;1	3;1	3;1	Disheveled-associated activator of morphogenesis 1	Daam1	sp|Q8BPM0|DAAM1_MOUSE Disheveled-associated activator of morphogenesis 1 OS=Mus musculus OX=10090 GN=Daam1 PE=1 SV=4	2	3	3	3	3	3	3	0	0	0	3	3	3	0	0	0	3	3	3	0	0	0	3.1	3.1	3.1	123.37	1077	1077;1115	0	25.643	By MS/MS	By MS/MS	By MS/MS				3.1	3.1	3.1	0	0	0
Q8BQ46;F6QCI0	Q8BQ46;F6QCI0	6;4	4;2	4;2		Taf15	tr|Q8BQ46|Q8BQ46_MOUSE TAF15 RNA polymerase II, TATA box binding protein (TBP)-associated factor OS=Mus musculus OX=10090 GN=Taf15 PE=1 SV=1;tr|F6QCI0|F6QCI0_MOUSE TATA-box-binding protein-associated factor 15 (Fragment) OS=Mus musculus OX=10090 GN=Taf15 P	2	6	4	4	3	4	4	3	6	6	1	2	3	2	4	4	1	2	3	2	4	4	17.8	13.6	13.6	58.6	557	557;324	0	68.353	By MS/MS	By MS/MS	By MS/MS	By matching	By MS/MS	By MS/MS	8.8	10.2	12.9	10.4	17.8	17.8
Q8BTI8;A0A087WRX8	Q8BTI8	8;1	8;1	8;1	Serine/arginine repetitive matrix protein 2	Srrm2	sp|Q8BTI8|SRRM2_MOUSE Serine/arginine repetitive matrix protein 2 OS=Mus musculus OX=10090 GN=Srrm2 PE=1 SV=3	2	8	8	8	6	7	6	4	6	6	6	7	6	4	6	6	6	7	6	4	6	6	3.1	3.1	3.1	294.84	2703	2703;171	0	53.577	By MS/MS	By MS/MS	By MS/MS	By matching	By MS/MS	By MS/MS	2.4	2.7	2.4	1.8	2.3	2.4
Q8BTV2	Q8BTV2	5	5	5	Cleavage and polyadenylation specificity factor subunit 7	Cpsf7	sp|Q8BTV2|CPSF7_MOUSE Cleavage and polyadenylation specificity factor subunit 7 OS=Mus musculus OX=10090 GN=Cpsf7 PE=1 SV=2	1	5	5	5	5	5	5	0	0	0	5	5	5	0	0	0	5	5	5	0	0	0	11.3	11.3	11.3	52.01	471	471	0	42.796	By MS/MS	By MS/MS	By MS/MS				11.3	11.3	11.3	0	0	0
Q8BTW8	Q8BTW8	1	1	1	CDK5 regulatory subunit-associated protein 1	Cdk5rap1	sp|Q8BTW8|CK5P1_MOUSE CDK5 regulatory subunit-associated protein 1 OS=Mus musculus OX=10090 GN=Cdk5rap1 PE=2 SV=2	1	1	1	1	1	0	1	0	0	0	1	0	1	0	0	0	1	0	1	0	0	0	2.9	2.9	2.9	66.109	588	588	0	7.0764	By MS/MS		By MS/MS				2.9	0	2.9	0	0	0
Q8BU14	Q8BU14	1	1	1	Translocation protein SEC62	Sec62	sp|Q8BU14|SEC62_MOUSE Translocation protein SEC62 OS=Mus musculus OX=10090 GN=Sec62 PE=1 SV=1	1	1	1	1	1	1	1	1	1	1	1	1	1	1	1	1	1	1	1	1	1	1	3	3	3	45.58	398	398	0	7.1485	By MS/MS	By matching	By matching	By matching	By matching	By MS/MS	3	3	3	3	3	3
Q8BUE4	Q8BUE4	1	1	1	Apoptosis-inducing factor 2	Aifm2	sp|Q8BUE4|AIFM2_MOUSE Apoptosis-inducing factor 2 OS=Mus musculus OX=10090 GN=Aifm2 PE=1 SV=1	1	1	1	1	1	1	1	0	0	0	1	1	1	0	0	0	1	1	1	0	0	0	2.4	2.4	2.4	40.634	373	373	0.0033784	6.0715	By MS/MS	By MS/MS	By MS/MS				2.4	2.4	2.4	0	0	0
Q8BUV6	Q8BUV6	1	1	1	U7 snRNA-associated Sm-like protein LSm11	Lsm11	sp|Q8BUV6|LSM11_MOUSE U7 snRNA-associated Sm-like protein LSm11 OS=Mus musculus OX=10090 GN=Lsm11 PE=1 SV=1	1	1	1	1	0	1	1	0	0	0	0	1	1	0	0	0	0	1	1	0	0	0	2.8	2.8	2.8	39.906	361	361	0	6.61		By matching	By MS/MS				0	2.8	2.8	0	0	0
Q8BUY8	Q8BUY8	1	1	1	G-protein coupled receptor-associated sorting protein 2	Gprasp2	sp|Q8BUY8|GASP2_MOUSE G-protein coupled receptor-associated sorting protein 2 OS=Mus musculus OX=10090 GN=Gprasp2 PE=1 SV=2	1	1	1	1	1	1	1	0	0	0	1	1	1	0	0	0	1	1	1	0	0	0	2.1	2.1	2.1	92.801	826	826	0	7.9176	By matching	By MS/MS	By MS/MS				2.1	2.1	2.1	0	0	0
Q8BVY0;A0A2R8VHW2	Q8BVY0;A0A2R8VHW2	6;3	6;3	6;3	Ribosomal L1 domain-containing protein 1	Rsl1d1	sp|Q8BVY0|RL1D1_MOUSE Ribosomal L1 domain-containing protein 1 OS=Mus musculus OX=10090 GN=Rsl1d1 PE=1 SV=1;tr|A0A2R8VHW2|A0A2R8VHW2_MOUSE Ribosomal L1 domain-containing protein 1 (Fragment) OS=Mus musculus OX=10090 GN=Rsl1d1 PE=1 SV=1	2	6	6	6	5	5	6	2	4	4	5	5	6	2	4	4	5	5	6	2	4	4	11.7	11.7	11.7	50.421	452	452;238	0	91.192	By MS/MS	By MS/MS	By MS/MS	By matching	By matching	By matching	11.5	11.5	11.7	6	11.5	11.5
Q8BX02	Q8BX02	1	1	1	KN motif and ankyrin repeat domain-containing protein 2	Kank2	sp|Q8BX02|KANK2_MOUSE KN motif and ankyrin repeat domain-containing protein 2 OS=Mus musculus OX=10090 GN=Kank2 PE=1 SV=1	1	1	1	1	1	1	1	0	0	0	1	1	1	0	0	0	1	1	1	0	0	0	1.4	1.4	1.4	90.244	843	843	0.0054765	6.0062	By matching	By matching	By MS/MS				1.4	1.4	1.4	0	0	0
Q8BYK6	Q8BYK6	2	2	2	YTH domain-containing family protein 3	Ythdf3	sp|Q8BYK6|YTHD3_MOUSE YTH domain-containing family protein 3 OS=Mus musculus OX=10090 GN=Ythdf3 PE=1 SV=2	1	2	2	2	2	2	2	1	2	2	2	2	2	1	2	2	2	2	2	1	2	2	4.4	4.4	4.4	63.961	585	585	0	14.094	By MS/MS	By matching	By MS/MS	By matching	By matching	By matching	4.4	4.4	4.4	1.7	4.4	4.4
Q8C156	Q8C156	1	1	1	Condensin complex subunit 2	Ncaph	sp|Q8C156|CND2_MOUSE Condensin complex subunit 2 OS=Mus musculus OX=10090 GN=Ncaph PE=1 SV=1	1	1	1	1	1	1	1	0	1	1	1	1	1	0	1	1	1	1	1	0	1	1	1.6	1.6	1.6	82.302	731	731	0	7.5789	By MS/MS	By MS/MS	By MS/MS		By matching	By matching	1.6	1.6	1.6	0	1.6	1.6
Q8C2Q3;E9QL13	Q8C2Q3;E9QL13	7;6	7;6	7;6	RNA-binding protein 14	Rbm14	sp|Q8C2Q3|RBM14_MOUSE RNA-binding protein 14 OS=Mus musculus OX=10090 GN=Rbm14 PE=1 SV=1;tr|E9QL13|E9QL13_MOUSE MCG8382, isoform CRA_c OS=Mus musculus OX=10090 GN=Rbm14 PE=1 SV=2	2	7	7	7	7	7	7	5	7	6	7	7	7	5	7	6	7	7	7	5	7	6	12	12	12	69.448	669	669;614	0	44.628	By MS/MS	By MS/MS	By MS/MS	By matching	By MS/MS	By MS/MS	12	12	12	8.5	12	10.8
Q8C605;Q9WUA3	Q8C605;Q9WUA3	3;3	1;1	1;1	ATP-dependent 6-phosphofructokinase;ATP-dependent 6-phosphofructokinase, platelet type	Pfkp	tr|Q8C605|Q8C605_MOUSE ATP-dependent 6-phosphofructokinase OS=Mus musculus OX=10090 GN=Pfkp PE=1 SV=1;sp|Q9WUA3|PFKAP_MOUSE ATP-dependent 6-phosphofructokinase, platelet type OS=Mus musculus OX=10090 GN=Pfkp PE=1 SV=1	2	3	1	1	3	3	3	2	2	2	1	1	1	0	0	0	1	1	1	0	0	0	5.2	1.7	1.7	85.546	784	784;784	0	13.235	By MS/MS	By MS/MS	By MS/MS	By matching	By matching	By matching	5.2	5.2	5.2	3.6	3.6	3.6
Q8C7U1	Q8C7U1	3	3	3	NEDD4-binding protein 3	N4bp3	sp|Q8C7U1|N4BP3_MOUSE NEDD4-binding protein 3 OS=Mus musculus OX=10090 GN=N4bp3 PE=1 SV=1	1	3	3	3	3	3	3	0	0	0	3	3	3	0	0	0	3	3	3	0	0	0	6.3	6.3	6.3	60.042	537	537	0	21.924	By MS/MS	By MS/MS	By MS/MS				6.3	6.3	6.3	0	0	0
Q8CAQ8;E9QAY6;E9Q800;A0A0U1RP81;A0A1B0GX08;E9PVS5;A0A0U1RQ14	Q8CAQ8;E9QAY6;E9Q800;A0A0U1RP81	7;6;6;5;3;2;1	7;6;6;5;3;2;1	7;6;6;5;3;2;1	MICOS complex subunit Mic60	Immt	sp|Q8CAQ8|MIC60_MOUSE MICOS complex subunit Mic60 OS=Mus musculus OX=10090 GN=Immt PE=1 SV=1;tr|E9QAY6|E9QAY6_MOUSE MICOS complex subunit MIC60 OS=Mus musculus OX=10090 GN=Immt PE=1 SV=1;tr|E9Q800|E9Q800_MOUSE MICOS complex subunit MIC60 OS=Mus musculus OX	7	7	7	7	6	6	7	0	1	1	6	6	7	0	1	1	6	6	7	0	1	1	10.8	10.8	10.8	83.899	757	757;470;679;488;264;188;289	0	52.189	By MS/MS	By MS/MS	By MS/MS		By matching	By matching	9.8	9.1	10.8	0	1.7	1.2
Q8CE90	Q8CE90	2	2	2	Dual specificity mitogen-activated protein kinase kinase 7	Map2k7	sp|Q8CE90|MP2K7_MOUSE Dual specificity mitogen-activated protein kinase kinase 7 OS=Mus musculus OX=10090 GN=Map2k7 PE=1 SV=1	1	2	2	2	2	2	2	0	0	0	2	2	2	0	0	0	2	2	2	0	0	0	3.9	3.9	3.9	59.312	535	535	0	12.731	By MS/MS	By MS/MS	By MS/MS				3.9	3.9	3.9	0	0	0
Q8CFI7	Q8CFI7	7	7	7	DNA-directed RNA polymerase II subunit RPB2	Polr2b	sp|Q8CFI7|RPB2_MOUSE DNA-directed RNA polymerase II subunit RPB2 OS=Mus musculus OX=10090 GN=Polr2b PE=1 SV=2	1	7	7	7	6	7	6	0	3	1	6	7	6	0	3	1	6	7	6	0	3	1	6.8	6.8	6.8	133.91	1174	1174	0	56.161	By MS/MS	By MS/MS	By MS/MS		By matching	By matching	6.1	6.8	6.1	0	2.6	1
Q8CG48;B1AWH6	Q8CG48	8;3	8;3	8;3	Structural maintenance of chromosomes protein 2	Smc2	sp|Q8CG48|SMC2_MOUSE Structural maintenance of chromosomes protein 2 OS=Mus musculus OX=10090 GN=Smc2 PE=1 SV=2	2	8	8	8	5	7	8	2	3	2	5	7	8	2	3	2	5	7	8	2	3	2	7.3	7.3	7.3	134.24	1191	1191;471	0	50.644	By MS/MS	By MS/MS	By MS/MS	By matching	By matching	By matching	4.1	6.6	7.3	1.6	3	1.6
Q8CGC6	Q8CGC6	2	2	2	RNA-binding protein 28	Rbm28	sp|Q8CGC6|RBM28_MOUSE RNA-binding protein 28 OS=Mus musculus OX=10090 GN=Rbm28 PE=1 SV=4	1	2	2	2	2	2	2	1	2	1	2	2	2	1	2	1	2	2	2	1	2	1	3.1	3.1	3.1	84.213	750	750	0	11.522	By MS/MS	By MS/MS	By MS/MS	By matching	By matching	By matching	3.1	3.1	3.1	1.5	3.1	1.5
Q8CGC7	Q8CGC7	17	17	17	Bifunctional glutamate/proline--tRNA ligase;Glutamate--tRNA ligase;Proline--tRNA ligase	Eprs	sp|Q8CGC7|SYEP_MOUSE Bifunctional glutamate/proline--tRNA ligase OS=Mus musculus OX=10090 GN=Eprs PE=1 SV=4	1	17	17	17	15	17	17	10	14	15	15	17	17	10	14	15	15	17	17	10	14	15	13	13	13	170.08	1512	1512	0	235.84	By MS/MS	By MS/MS	By MS/MS	By MS/MS	By MS/MS	By MS/MS	10.8	13	13	7.9	12.6	11.4
Q8CGF6	Q8CGF6	1	1	1	WD repeat-containing protein 47	Wdr47	sp|Q8CGF6|WDR47_MOUSE WD repeat-containing protein 47 OS=Mus musculus OX=10090 GN=Wdr47 PE=1 SV=2	1	1	1	1	1	1	1	0	0	0	1	1	1	0	0	0	1	1	1	0	0	0	1.2	1.2	1.2	102.31	920	920	0	6.9333	By MS/MS	By MS/MS	By MS/MS				1.2	1.2	1.2	0	0	0
Q8CGK3	Q8CGK3	2	2	2	Lon protease homolog, mitochondrial	Lonp1	sp|Q8CGK3|LONM_MOUSE Lon protease homolog, mitochondrial OS=Mus musculus OX=10090 GN=Lonp1 PE=1 SV=2	1	2	2	2	2	1	2	0	0	1	2	1	2	0	0	1	2	1	2	0	0	1	2.6	2.6	2.6	105.84	949	949	0	13.862	By matching	By MS/MS	By MS/MS			By matching	2.6	1.1	2.6	0	0	1.6
Q8CHW4	Q8CHW4	1	1	1	Translation initiation factor eIF-2B subunit epsilon	Eif2b5	sp|Q8CHW4|EI2BE_MOUSE Translation initiation factor eIF-2B subunit epsilon OS=Mus musculus OX=10090 GN=Eif2b5 PE=1 SV=1	1	1	1	1	1	1	1	1	1	1	1	1	1	1	1	1	1	1	1	1	1	1	1.8	1.8	1.8	80.085	717	717	0	9.4733	By MS/MS	By MS/MS	By MS/MS	By matching	By MS/MS	By matching	1.8	1.8	1.8	1.8	1.8	1.8
Q8CI11;A0A2I3BR32;A0A2I3BR82;A0A2I3BRV9;A0A2I3BPZ6	Q8CI11;A0A2I3BR32	5;3;2;2;2	5;3;2;2;2	5;3;2;2;2	Guanine nucleotide-binding protein-like 3	Gnl3	sp|Q8CI11|GNL3_MOUSE Guanine nucleotide-binding protein-like 3 OS=Mus musculus OX=10090 GN=Gnl3 PE=1 SV=2;tr|A0A2I3BR32|A0A2I3BR32_MOUSE Guanine nucleotide-binding protein-like 3 (Fragment) OS=Mus musculus OX=10090 GN=Gnl3 PE=1 SV=1	5	5	5	5	3	5	4	2	3	4	3	5	4	2	3	4	3	5	4	2	3	4	12.8	12.8	12.8	60.786	538	538;159;136;146;156	0	52.117	By MS/MS	By MS/MS	By MS/MS	By matching	By MS/MS	By MS/MS	8.6	12.8	11.5	6.5	8.6	11.5
Q8CI61	Q8CI61	2	2	2	BAG family molecular chaperone regulator 4	Bag4	sp|Q8CI61|BAG4_MOUSE BAG family molecular chaperone regulator 4 OS=Mus musculus OX=10090 GN=Bag4 PE=1 SV=2	1	2	2	2	2	2	2	2	2	2	2	2	2	2	2	2	2	2	2	2	2	2	6.1	6.1	6.1	49.094	457	457	0	18.025	By MS/MS	By MS/MS	By MS/MS	By matching	By MS/MS	By MS/MS	6.1	6.1	6.1	6.1	6.1	6.1
Q8CJG0	Q8CJG0	2	2	2	Protein argonaute-2	Ago2	sp|Q8CJG0|AGO2_MOUSE Protein argonaute-2 OS=Mus musculus OX=10090 GN=Ago2 PE=1 SV=3	1	2	2	2	2	1	2	1	1	1	2	1	2	1	1	1	2	1	2	1	1	1	2.6	2.6	2.6	97.303	860	860	0	12.484	By matching	By MS/MS	By MS/MS	By matching	By matching	By matching	2.6	1.3	2.6	1.3	1.3	1.3
Q8JZL2	Q8JZL2	1	1	1	Melanin-concentrating hormone receptor 1	Mchr1	sp|Q8JZL2|MCHR1_MOUSE Melanin-concentrating hormone receptor 1 OS=Mus musculus OX=10090 GN=Mchr1 PE=2 SV=3	1	1	1	1	0	0	0	0	0	1	0	0	0	0	0	1	0	0	0	0	0	1	3.1	3.1	3.1	39.12	353	353	0.0033746	6.0695						By MS/MS	0	0	0	0	0	3.1
Q8JZQ2;Q920A7	Q8JZQ2	5;1	5;1	5;1	AFG3-like protein 2	Afg3l2	sp|Q8JZQ2|AFG32_MOUSE AFG3-like protein 2 OS=Mus musculus OX=10090 GN=Afg3l2 PE=1 SV=1	2	5	5	5	5	5	5	1	3	4	5	5	5	1	3	4	5	5	5	1	3	4	6	6	6	89.518	802	802;789	0	30.984	By MS/MS	By MS/MS	By MS/MS	By matching	By matching	By matching	6	6	6	1.5	3.5	4.6
Q8JZQ9	Q8JZQ9	2	2	2	Eukaryotic translation initiation factor 3 subunit B	Eif3b	sp|Q8JZQ9|EIF3B_MOUSE Eukaryotic translation initiation factor 3 subunit B OS=Mus musculus OX=10090 GN=Eif3b PE=1 SV=1	1	2	2	2	2	2	2	1	0	1	2	2	2	1	0	1	2	2	2	1	0	1	5.4	5.4	5.4	91.369	803	803	0	16.111	By MS/MS	By MS/MS	By matching	By matching		By matching	5.4	5.4	5.4	2.9	0	2.9
Q8JZS6	Q8JZS6	1	1	1	NEDD4-binding protein 2-like 2	N4bp2l2	sp|Q8JZS6|N42L2_MOUSE NEDD4-binding protein 2-like 2 OS=Mus musculus OX=10090 GN=N4bp2l2 PE=2 SV=2	1	1	1	1	1	1	1	0	0	0	1	1	1	0	0	0	1	1	1	0	0	0	1.9	1.9	1.9	66.25	575	575	0	7.2363	By MS/MS	By MS/MS	By MS/MS				1.9	1.9	1.9	0	0	0
Q8JZU2	Q8JZU2	1	1	1	Tricarboxylate transport protein, mitochondrial	Slc25a1	sp|Q8JZU2|TXTP_MOUSE Tricarboxylate transport protein, mitochondrial OS=Mus musculus OX=10090 GN=Slc25a1 PE=1 SV=1	1	1	1	1	1	1	1	1	1	1	1	1	1	1	1	1	1	1	1	1	1	1	4.2	4.2	4.2	33.931	311	311	0	11.851	By MS/MS	By MS/MS	By MS/MS	By matching	By matching	By matching	4.2	4.2	4.2	4.2	4.2	4.2
Q8K009;D3Z6B9	Q8K009;D3Z6B9	5;4	5;4	5;4	Mitochondrial 10-formyltetrahydrofolate dehydrogenase	Aldh1l2	sp|Q8K009|AL1L2_MOUSE Mitochondrial 10-formyltetrahydrofolate dehydrogenase OS=Mus musculus OX=10090 GN=Aldh1l2 PE=1 SV=2;tr|D3Z6B9|D3Z6B9_MOUSE Mitochondrial 10-formyltetrahydrofolate dehydrogenase OS=Mus musculus OX=10090 GN=Aldh1l2 PE=1 SV=1	2	5	5	5	5	5	5	0	4	1	5	5	5	0	4	1	5	5	5	0	4	1	6.1	6.1	6.1	101.59	923	923;810	0	48.404	By MS/MS	By MS/MS	By MS/MS		By matching	By matching	6.1	6.1	6.1	0	6	1.6
Q8K2B3;A0A1Y7VJ55	Q8K2B3	8;1	8;1	8;1	Succinate dehydrogenase [ubiquinone] flavoprotein subunit, mitochondrial	Sdha	sp|Q8K2B3|SDHA_MOUSE Succinate dehydrogenase [ubiquinone] flavoprotein subunit, mitochondrial OS=Mus musculus OX=10090 GN=Sdha PE=1 SV=1	2	8	8	8	5	6	6	2	6	3	5	6	6	2	6	3	5	6	6	2	6	3	11.4	11.4	11.4	72.585	664	664;233	0	77.91	By MS/MS	By MS/MS	By MS/MS	By matching	By MS/MS	By MS/MS	8.3	8.3	9.5	3.3	9.6	5.3
Q8K310;A0A087WSU2;A0A087WQP4;A0A087WNP3;A0A087WPU5;A0A087WPQ5;A0A087WSF8;A0A087WQ54;A0A087WQD6;A0A087WSP7;A0A087WQZ1	Q8K310;A0A087WSU2	3;2;1;1;1;1;1;1;1;1;1	3;2;1;1;1;1;1;1;1;1;1	3;2;1;1;1;1;1;1;1;1;1	Matrin-3	Matr3	sp|Q8K310|MATR3_MOUSE Matrin-3 OS=Mus musculus OX=10090 GN=Matr3 PE=1 SV=1;tr|A0A087WSU2|A0A087WSU2_MOUSE Matrin-3 (Fragment) OS=Mus musculus OX=10090 GN=Matr3 PE=1 SV=6	11	3	3	3	2	2	3	2	2	2	2	2	3	2	2	2	2	2	3	2	2	2	3.8	3.8	3.8	94.629	846	846;385;33;60;61;87;91;102;155;508;558	0	18.523	By MS/MS	By MS/MS	By MS/MS	By matching	By MS/MS	By matching	2.7	2.7	3.8	2.7	2.7	2.7
Q8K363	Q8K363	2	2	2	ATP-dependent RNA helicase DDX18	Ddx18	sp|Q8K363|DDX18_MOUSE ATP-dependent RNA helicase DDX18 OS=Mus musculus OX=10090 GN=Ddx18 PE=1 SV=1	1	2	2	2	2	1	1	1	1	2	2	1	1	1	1	2	2	1	1	1	1	2	4.4	4.4	4.4	74.18	660	660	0	11.902	By MS/MS	By matching	By MS/MS	By matching	By matching	By matching	4.4	2.9	2.9	2.9	2.9	4.4
Q8K3A9	Q8K3A9	1	1	1	7SK snRNA methylphosphate capping enzyme	Mepce	sp|Q8K3A9|MEPCE_MOUSE 7SK snRNA methylphosphate capping enzyme OS=Mus musculus OX=10090 GN=Mepce PE=1 SV=2	1	1	1	1	1	1	1	1	0	1	1	1	1	1	0	1	1	1	1	1	0	1	1.7	1.7	1.7	72.05	666	666	0.0011547	6.1498	By MS/MS	By MS/MS	By MS/MS	By matching		By matching	1.7	1.7	1.7	1.7	0	1.7
Q8K3J1	Q8K3J1	1	1	1	NADH dehydrogenase [ubiquinone] iron-sulfur protein 8, mitochondrial	Ndufs8	sp|Q8K3J1|NDUS8_MOUSE NADH dehydrogenase [ubiquinone] iron-sulfur protein 8, mitochondrial OS=Mus musculus OX=10090 GN=Ndufs8 PE=1 SV=1	1	1	1	1	1	1	1	0	0	1	1	1	1	0	0	1	1	1	1	0	0	1	4.2	4.2	4.2	24.038	212	212	0.0082645	5.8675	By MS/MS	By MS/MS	By MS/MS			By matching	4.2	4.2	4.2	0	0	4.2
Q8K3Z9	Q8K3Z9	5	5	5	Nuclear envelope pore membrane protein POM 121	Pom121	sp|Q8K3Z9|PO121_MOUSE Nuclear envelope pore membrane protein POM 121 OS=Mus musculus OX=10090 GN=Pom121 PE=1 SV=2	1	5	5	5	5	5	5	0	1	1	5	5	5	0	1	1	5	5	5	0	1	1	5.4	5.4	5.4	121.02	1200	1200	0	46.356	By MS/MS	By MS/MS	By MS/MS		By matching	By matching	5.4	5.4	5.4	0	1.2	1.3
Q8K4L0	Q8K4L0	1	1	1	ATP-dependent RNA helicase DDX54	Ddx54	sp|Q8K4L0|DDX54_MOUSE ATP-dependent RNA helicase DDX54 OS=Mus musculus OX=10090 GN=Ddx54 PE=1 SV=1	1	1	1	1	1	1	1	1	1	1	1	1	1	1	1	1	1	1	1	1	1	1	1.3	1.3	1.3	97.747	874	874	0	8.9646	By MS/MS	By MS/MS	By MS/MS	By matching	By matching	By MS/MS	1.3	1.3	1.3	1.3	1.3	1.3
Q8N7N6	Q8N7N6	1	1	1		Traf3ip2	tr|Q8N7N6|Q8N7N6_MOUSE TRAF3-interacting protein 2 OS=Mus musculus OX=10090 GN=Traf3ip2 PE=1 SV=1	1	1	1	1	0	1	1	0	0	0	0	1	1	0	0	0	0	1	1	0	0	0	3.2	3.2	3.2	62.439	555	555	0	6.6923		By MS/MS	By matching				0	3.2	3.2	0	0	0
Q8QZT1	Q8QZT1	1	1	1	Acetyl-CoA acetyltransferase, mitochondrial	Acat1	sp|Q8QZT1|THIL_MOUSE Acetyl-CoA acetyltransferase, mitochondrial OS=Mus musculus OX=10090 GN=Acat1 PE=1 SV=1	1	1	1	1	1	1	1	1	1	1	1	1	1	1	1	1	1	1	1	1	1	1	3.1	3.1	3.1	44.816	424	424	0	6.5638	By MS/MS	By MS/MS	By MS/MS	By matching	By matching	By matching	3.1	3.1	3.1	3.1	3.1	3.1
Q8QZT2	Q8QZT2	1	1	1	Centriole, cilia and spindle-associated protein	Ccsap	sp|Q8QZT2|CCSAP_MOUSE Centriole, cilia and spindle-associated protein OS=Mus musculus OX=10090 GN=Ccsap PE=1 SV=1	1	1	1	1	0	1	0	0	0	0	0	1	0	0	0	0	0	1	0	0	0	0	4.8	4.8	4.8	28.378	252	252	0	6.3826		By MS/MS					0	4.8	0	0	0	0
Q8QZY9	Q8QZY9	1	1	1	Splicing factor 3B subunit 4	Sf3b4	sp|Q8QZY9|SF3B4_MOUSE Splicing factor 3B subunit 4 OS=Mus musculus OX=10090 GN=Sf3b4 PE=1 SV=1	1	1	1	1	1	0	1	1	1	1	1	0	1	1	1	1	1	0	1	1	1	1	3.3	3.3	3.3	44.355	424	424	0	9.8879	By MS/MS		By MS/MS	By matching	By matching	By matching	3.3	0	3.3	3.3	3.3	3.3
Q8R191	Q8R191	1	1	1	Synaptogyrin-3	Syngr3	sp|Q8R191|SNG3_MOUSE Synaptogyrin-3 OS=Mus musculus OX=10090 GN=Syngr3 PE=1 SV=1	1	1	1	1	0	1	1	0	0	0	0	1	1	0	0	0	0	1	1	0	0	0	4.4	4.4	4.4	24.561	229	229	0	6.6902		By matching	By MS/MS				0	4.4	4.4	0	0	0
Q8R1B4	Q8R1B4	1	1	1	Eukaryotic translation initiation factor 3 subunit C	Eif3c	sp|Q8R1B4|EIF3C_MOUSE Eukaryotic translation initiation factor 3 subunit C OS=Mus musculus OX=10090 GN=Eif3c PE=1 SV=1	1	1	1	1	1	1	1	1	1	1	1	1	1	1	1	1	1	1	1	1	1	1	1.1	1.1	1.1	105.53	911	911	0	8.2898	By MS/MS	By MS/MS	By MS/MS	By matching	By matching	By matching	1.1	1.1	1.1	1.1	1.1	1.1
Q8R2T8;H3BJX5	Q8R2T8;H3BJX5	2;1	2;1	2;1	General transcription factor 3C polypeptide 5	Gtf3c5	sp|Q8R2T8|TF3C5_MOUSE General transcription factor 3C polypeptide 5 OS=Mus musculus OX=10090 GN=Gtf3c5 PE=2 SV=2;tr|H3BJX5|H3BJX5_MOUSE General transcription factor 3C polypeptide 5 OS=Mus musculus OX=10090 GN=Gtf3c5 PE=1 SV=1	2	2	2	2	2	1	1	0	1	0	2	1	1	0	1	0	2	1	1	0	1	0	4.8	4.8	4.8	60.501	520	520;55	0	12.286	By MS/MS	By matching	By MS/MS		By matching		4.8	2.5	2.5	0	2.5	0
Q8R323	Q8R323	2	2	2	Replication factor C subunit 3	Rfc3	sp|Q8R323|RFC3_MOUSE Replication factor C subunit 3 OS=Mus musculus OX=10090 GN=Rfc3 PE=1 SV=1	1	2	2	2	2	2	2	0	0	0	2	2	2	0	0	0	2	2	2	0	0	0	7.9	7.9	7.9	40.526	356	356	0	22.263	By MS/MS	By MS/MS	By MS/MS				7.9	7.9	7.9	0	0	0
Q8R4E9	Q8R4E9	2	2	2	DNA replication factor Cdt1	Cdt1	sp|Q8R4E9|CDT1_MOUSE DNA replication factor Cdt1 OS=Mus musculus OX=10090 GN=Cdt1 PE=1 SV=1	1	2	2	2	2	2	2	0	0	0	2	2	2	0	0	0	2	2	2	0	0	0	4.3	4.3	4.3	61.509	557	557	0	12.029	By MS/MS	By MS/MS	By MS/MS				4.3	4.3	4.3	0	0	0
Q8R5H1	Q8R5H1	2	1	1	Ubiquitin carboxyl-terminal hydrolase 15	Usp15	sp|Q8R5H1|UBP15_MOUSE Ubiquitin carboxyl-terminal hydrolase 15 OS=Mus musculus OX=10090 GN=Usp15 PE=1 SV=1	1	2	1	1	2	0	0	0	0	0	1	0	0	0	0	0	1	0	0	0	0	0	2.1	1.2	1.2	112.32	981	981	0	11.706	By MS/MS						2.1	0	0	0	0	0
Q8VCE2;D6RCY0;D3Z3X7	Q8VCE2	3;1;1	3;1;1	3;1;1	GPN-loop GTPase 1	Gpn1	sp|Q8VCE2|GPN1_MOUSE GPN-loop GTPase 1 OS=Mus musculus OX=10090 GN=Gpn1 PE=1 SV=1	3	3	3	3	3	3	3	0	0	0	3	3	3	0	0	0	3	3	3	0	0	0	7.8	7.8	7.8	41.598	372	372;85;91	0	33.327	By MS/MS	By MS/MS	By MS/MS				7.8	7.8	7.8	0	0	0
Q8VCE9;A2A4L0	Q8VCE9;A2A4L0	2;1	2;1	2;1	Pleckstrin homology domain-containing family H member 3	Plekhh3	sp|Q8VCE9|PKHH3_MOUSE Pleckstrin homology domain-containing family H member 3 OS=Mus musculus OX=10090 GN=Plekhh3 PE=2 SV=1;tr|A2A4L0|A2A4L0_MOUSE Pleckstrin homology domain-containing family H member 3 (Fragment) OS=Mus musculus OX=10090 GN=Plekhh3 PE=1 S	2	2	2	2	2	1	2	0	1	0	2	1	2	0	1	0	2	1	2	0	1	0	2.9	2.9	2.9	85.841	796	796;247	0	11.897	By MS/MS	By MS/MS	By matching		By matching		2.9	1.5	2.9	0	1.4	0
Q8VCF0	Q8VCF0	1	1	1	Mitochondrial antiviral-signaling protein	Mavs	sp|Q8VCF0|MAVS_MOUSE Mitochondrial antiviral-signaling protein OS=Mus musculus OX=10090 GN=Mavs PE=1 SV=1	1	1	1	1	1	1	1	1	0	1	1	1	1	1	0	1	1	1	1	1	0	1	3	3	3	53.398	503	503	0	9.989	By MS/MS	By MS/MS	By MS/MS	By matching		By MS/MS	3	3	3	3	0	3
Q8VDD5;A0A2R8VHF9;E9QPE7;O08638;A0A2R8VKI5	Q8VDD5	32;3;3;3;2	32;3;3;3;2	29;1;1;1;2	Myosin-9	Myh9	sp|Q8VDD5|MYH9_MOUSE Myosin-9 OS=Mus musculus OX=10090 GN=Myh9 PE=1 SV=4	5	32	32	29	32	27	30	24	25	22	32	27	30	24	25	22	29	25	28	22	22	21	17.2	17.2	16.2	226.37	1960	1960;1938;1972;1972;211	0	287.01	By MS/MS	By MS/MS	By MS/MS	By MS/MS	By MS/MS	By MS/MS	17.2	15.3	16.1	13.4	13.7	11.6
Q8VDM4;E9Q2S8	Q8VDM4	4;1	4;1	4;1	26S proteasome non-ATPase regulatory subunit 2	Psmd2	sp|Q8VDM4|PSMD2_MOUSE 26S proteasome non-ATPase regulatory subunit 2 OS=Mus musculus OX=10090 GN=Psmd2 PE=1 SV=1	2	4	4	4	4	4	3	1	1	2	4	4	3	1	1	2	4	4	3	1	1	2	6.2	6.2	6.2	100.2	908	908;60	0	52.289	By MS/MS	By MS/MS	By MS/MS	By matching	By MS/MS	By MS/MS	6.2	6.2	5.3	1.3	1.3	3
Q8VDM6	Q8VDM6	4	4	4	Heterogeneous nuclear ribonucleoprotein U-like protein 1	Hnrnpul1	sp|Q8VDM6|HNRL1_MOUSE Heterogeneous nuclear ribonucleoprotein U-like protein 1 OS=Mus musculus OX=10090 GN=Hnrnpul1 PE=1 SV=1	1	4	4	4	3	3	3	2	4	4	3	3	3	2	4	4	3	3	3	2	4	4	5.2	5.2	5.2	96.001	859	859	0	28.523	By MS/MS	By MS/MS	By MS/MS	By matching	By MS/MS	By MS/MS	4	3.5	4.2	2.2	5.2	5.2
Q8VDN2;A0A0G2JGX4;Q8VCE0;Q6PIC6;D3YYN7;Q6PIE5;Q91WH7;E9QNX7;Q64436	Q8VDN2	12;4;4;4;3;3;1;1;1	12;4;4;4;3;3;1;1;1	12;4;4;4;3;3;1;1;1	Sodium/potassium-transporting ATPase subunit alpha-1	Atp1a1	sp|Q8VDN2|AT1A1_MOUSE Sodium/potassium-transporting ATPase subunit alpha-1 OS=Mus musculus OX=10090 GN=Atp1a1 PE=1 SV=1	9	12	12	12	8	12	9	7	11	12	8	12	9	7	11	12	8	12	9	7	11	12	12.9	12.9	12.9	112.98	1023	1023;1026;1053;1013;947;1020;1025;1034;1033	0	80.805	By MS/MS	By MS/MS	By MS/MS	By matching	By MS/MS	By MS/MS	9.7	12.9	10.5	7	12.1	12.9
Z4YLD0;Q8VDP2	Z4YLD0;Q8VDP2	1;1	1;1	1;1	UPF0428 protein CXorf56 homolog	C330007P06Rik	tr|Z4YLD0|Z4YLD0_MOUSE RIKEN cDNA C330007P06 gene OS=Mus musculus OX=10090 GN=C330007P06Rik PE=1 SV=1;sp|Q8VDP2|CX056_MOUSE UPF0428 protein CXorf56 homolog OS=Mus musculus OX=10090 PE=1 SV=1	2	1	1	1	1	1	1	1	1	1	1	1	1	1	1	1	1	1	1	1	1	1	4.8	4.8	4.8	25.834	227	227;222	0.001171	6.1973	By matching	By matching	By matching	By matching	By MS/MS	By matching	4.8	4.8	4.8	4.8	4.8	4.8
Q8VE73	Q8VE73	2	2	2	Cullin-7	Cul7	sp|Q8VE73|CUL7_MOUSE Cullin-7 OS=Mus musculus OX=10090 GN=Cul7 PE=1 SV=2	1	2	2	2	1	2	2	0	0	0	1	2	2	0	0	0	1	2	2	0	0	0	1.1	1.1	1.1	192.29	1689	1689	0	13.636	By MS/MS	By MS/MS	By matching				0.5	1.1	1.1	0	0	0
Q9D1W4;Q8VE95	Q9D1W4;Q8VE95	1;1	1;1	1;1	UPF0598 protein C8orf82 homolog		tr|Q9D1W4|Q9D1W4_MOUSE RIKEN cDNA C030006K11 gene OS=Mus musculus OX=10090 GN=C030006K11Rik PE=1 SV=1;sp|Q8VE95|CH082_MOUSE UPF0598 protein C8orf82 homolog OS=Mus musculus OX=10090 PE=1 SV=1	2	1	1	1	1	1	1	0	0	0	1	1	1	0	0	0	1	1	1	0	0	0	8.4	8.4	8.4	15.717	143	143;218	0.0054825	6.0101	By matching	By matching	By MS/MS				8.4	8.4	8.4	0	0	0
Q8VEK3	Q8VEK3	14	14	14	Heterogeneous nuclear ribonucleoprotein U	Hnrnpu	sp|Q8VEK3|HNRPU_MOUSE Heterogeneous nuclear ribonucleoprotein U OS=Mus musculus OX=10090 GN=Hnrnpu PE=1 SV=1	1	14	14	14	13	11	11	7	13	10	13	11	11	7	13	10	13	11	11	7	13	10	17.8	17.8	17.8	87.917	800	800	0	105.43	By MS/MS	By MS/MS	By MS/MS	By MS/MS	By MS/MS	By MS/MS	17.6	12.6	14	6.1	17.6	12.2
Q8VHE0	Q8VHE0	1	1	1	Translocation protein SEC63 homolog	Sec63	sp|Q8VHE0|SEC63_MOUSE Translocation protein SEC63 homolog OS=Mus musculus OX=10090 GN=Sec63 PE=1 SV=4	1	1	1	1	1	0	1	0	0	1	1	0	1	0	0	1	1	0	1	0	0	1	1.4	1.4	1.4	87.869	760	760	0	7.989	By matching		By MS/MS			By matching	1.4	0	1.4	0	0	1.4
Q8VHM5;A2AW41;F7B5B5;A2AW40;V9GWW3	Q8VHM5;A2AW41;F7B5B5	3;2;2;1;1	3;2;2;1;1	2;1;1;1;1		Hnrnpr	tr|Q8VHM5|Q8VHM5_MOUSE Heterogeneous nuclear ribonucleoprotein R OS=Mus musculus OX=10090 GN=Hnrnpr PE=1 SV=1;tr|A2AW41|A2AW41_MOUSE Heterogeneous nuclear ribonucleoprotein R (Fragment) OS=Mus musculus OX=10090 GN=Hnrnpr PE=1 SV=1;tr|F7B5B5|F7B5B5_MOUSE He	5	3	3	2	2	3	3	2	3	2	2	3	3	2	3	2	1	2	2	1	2	1	5.7	5.7	3.8	70.887	632	632;270;531;73;103	0	24.912	By MS/MS	By MS/MS	By MS/MS	By matching	By MS/MS	By MS/MS	3.5	5.7	5.7	3.5	5.7	3.5
Q8VHX6	Q8VHX6	5	5	5	Filamin-C	Flnc	sp|Q8VHX6|FLNC_MOUSE Filamin-C OS=Mus musculus OX=10090 GN=Flnc PE=1 SV=3	1	5	5	5	5	3	5	4	4	5	5	3	5	4	4	5	5	3	5	4	4	5	2.3	2.3	2.3	291.12	2726	2726	0	30.898	By MS/MS	By MS/MS	By MS/MS	By matching	By MS/MS	By MS/MS	2.3	1.5	2.3	1.7	1.7	2.3
Q8VIJ6	Q8VIJ6	11	11	10	Splicing factor, proline- and glutamine-rich	Sfpq	sp|Q8VIJ6|SFPQ_MOUSE Splicing factor, proline- and glutamine-rich OS=Mus musculus OX=10090 GN=Sfpq PE=1 SV=1	1	11	11	10	9	11	9	6	9	8	9	11	9	6	9	8	8	10	8	6	8	7	15.7	15.7	14.6	75.441	699	699	0	78.403	By MS/MS	By MS/MS	By MS/MS	By matching	By MS/MS	By MS/MS	12.2	15.7	12	7.2	12	10.4
Q91V04	Q91V04	1	1	1	Translocating chain-associated membrane protein 1	Tram1	sp|Q91V04|TRAM1_MOUSE Translocating chain-associated membrane protein 1 OS=Mus musculus OX=10090 GN=Tram1 PE=1 SV=3	1	1	1	1	0	1	1	0	0	0	0	1	1	0	0	0	0	1	1	0	0	0	5.3	5.3	5.3	43.039	374	374	0	7.1213		By MS/MS	By matching				0	5.3	5.3	0	0	0
Q91VA7;V9GXV0	Q91VA7;V9GXV0	2;1	2;1	2;1	Isocitrate dehydrogenase [NAD] subunit, mitochondrial	Idh3b	tr|Q91VA7|Q91VA7_MOUSE Isocitrate dehydrogenase [NAD] subunit, mitochondrial OS=Mus musculus OX=10090 GN=Idh3b PE=1 SV=1;tr|V9GXV0|V9GXV0_MOUSE Isocitrate dehydrogenase 3 (NAD+) beta (Fragment) OS=Mus musculus OX=10090 GN=Idh3b PE=1 SV=1	2	2	2	2	2	2	2	0	0	0	2	2	2	0	0	0	2	2	2	0	0	0	5.5	5.5	5.5	42.194	384	384;80	0	17.837	By matching	By MS/MS	By MS/MS				5.5	5.5	5.5	0	0	0
Q91VD9	Q91VD9	2	2	2	NADH-ubiquinone oxidoreductase 75 kDa subunit, mitochondrial	Ndufs1	sp|Q91VD9|NDUS1_MOUSE NADH-ubiquinone oxidoreductase 75 kDa subunit, mitochondrial OS=Mus musculus OX=10090 GN=Ndufs1 PE=1 SV=2	1	2	2	2	2	1	2	1	0	1	2	1	2	1	0	1	2	1	2	1	0	1	2.8	2.8	2.8	79.776	727	727	0	13.411	By MS/MS	By MS/MS	By MS/MS	By matching		By matching	2.8	1.4	2.8	1.4	0	1.4
Q91VE0	Q91VE0	1	1	1	Long-chain fatty acid transport protein 4	Slc27a4	sp|Q91VE0|S27A4_MOUSE Long-chain fatty acid transport protein 4 OS=Mus musculus OX=10090 GN=Slc27a4 PE=1 SV=1	1	1	1	1	1	1	1	0	0	0	1	1	1	0	0	0	1	1	1	0	0	0	1.2	1.2	1.2	72.318	643	643	0.0073684	5.9085	By MS/MS	By MS/MS	By MS/MS				1.2	1.2	1.2	0	0	0
Q91VT4;D3Z6C4	Q91VT4	3;1	3;1	3;1	Carbonyl reductase family member 4	Cbr4	sp|Q91VT4|CBR4_MOUSE Carbonyl reductase family member 4 OS=Mus musculus OX=10090 GN=Cbr4 PE=1 SV=2	2	3	3	3	3	3	3	0	0	0	3	3	3	0	0	0	3	3	3	0	0	0	13.1	13.1	13.1	25.414	236	236;138	0	23.366	By MS/MS	By MS/MS	By MS/MS				13.1	13.1	13.1	0	0	0
Q91W43	Q91W43	2	2	2	Glycine dehydrogenase (decarboxylating), mitochondrial	Gldc	sp|Q91W43|GCSP_MOUSE Glycine dehydrogenase (decarboxylating), mitochondrial OS=Mus musculus OX=10090 GN=Gldc PE=1 SV=1	1	2	2	2	2	2	2	1	1	1	2	2	2	1	1	1	2	2	2	1	1	1	1.9	1.9	1.9	113.27	1025	1025	0	13.587	By MS/MS	By MS/MS	By matching	By matching	By matching	By matching	1.9	1.9	1.9	1.1	0.8	1.1
Q91WK2	Q91WK2	1	1	1	Eukaryotic translation initiation factor 3 subunit H	Eif3h	sp|Q91WK2|EIF3H_MOUSE Eukaryotic translation initiation factor 3 subunit H OS=Mus musculus OX=10090 GN=Eif3h PE=1 SV=1	1	1	1	1	1	1	1	0	1	1	1	1	1	0	1	1	1	1	1	0	1	1	5.4	5.4	5.4	39.832	352	352	0	16.477	By MS/MS	By matching	By MS/MS		By matching	By matching	5.4	5.4	5.4	0	5.4	5.4
Q91YK2	Q91YK2	2	2	2	Ribosomal RNA processing protein 1 homolog B	Rrp1b	sp|Q91YK2|RRP1B_MOUSE Ribosomal RNA processing protein 1 homolog B OS=Mus musculus OX=10090 GN=Rrp1b PE=1 SV=2	1	2	2	2	2	1	2	1	2	2	2	1	2	1	2	2	2	1	2	1	2	2	3.9	3.9	3.9	80.581	724	724	0	16.017	By MS/MS	By MS/MS	By MS/MS	By matching	By matching	By matching	3.9	2.1	3.9	2.1	3.9	3.9
Q91YN9	Q91YN9	4	4	4	BAG family molecular chaperone regulator 2	Bag2	sp|Q91YN9|BAG2_MOUSE BAG family molecular chaperone regulator 2 OS=Mus musculus OX=10090 GN=Bag2 PE=1 SV=1	1	4	4	4	4	4	4	2	4	3	4	4	4	2	4	3	4	4	4	2	4	3	13.8	13.8	13.8	23.473	210	210	0	27.407	By MS/MS	By MS/MS	By MS/MS	By matching	By MS/MS	By MS/MS	13.8	13.8	13.8	4.8	13.8	13.8
Q91YQ5;A0A0N4SUJ8	Q91YQ5	13;1	13;1	13;1	Dolichyl-diphosphooligosaccharide--protein glycosyltransferase subunit 1	Rpn1	sp|Q91YQ5|RPN1_MOUSE Dolichyl-diphosphooligosaccharide--protein glycosyltransferase subunit 1 OS=Mus musculus OX=10090 GN=Rpn1 PE=1 SV=1	2	13	13	13	10	13	10	8	10	13	10	13	10	8	10	13	10	13	10	8	10	13	18.4	18.4	18.4	68.527	608	608;90	0	100.46	By MS/MS	By MS/MS	By MS/MS	By matching	By MS/MS	By MS/MS	16.4	18.4	16.4	14	17.3	18.4
Q91YR7	Q91YR7	2	2	2	Pre-mRNA-processing factor 6	Prpf6	sp|Q91YR7|PRP6_MOUSE Pre-mRNA-processing factor 6 OS=Mus musculus OX=10090 GN=Prpf6 PE=1 SV=1	1	2	2	2	1	1	1	0	0	1	1	1	1	0	0	1	1	1	1	0	0	1	2.8	2.8	2.8	106.72	941	941	0	12.485	By MS/MS	By MS/MS	By MS/MS			By matching	1	1.8	1.8	0	0	1.8
Q91YT7;E9PW90	Q91YT7;E9PW90	2;1	2;1	2;1	YTH domain-containing family protein 2	Ythdf2	sp|Q91YT7|YTHD2_MOUSE YTH domain-containing family protein 2 OS=Mus musculus OX=10090 GN=Ythdf2 PE=1 SV=1;tr|E9PW90|E9PW90_MOUSE YTH domain-containing family protein 2 OS=Mus musculus OX=10090 GN=Ythdf2 PE=1 SV=1	2	2	2	2	1	2	2	2	2	2	1	2	2	2	2	2	1	2	2	2	2	2	4	4	4	62.279	579	579;51	0	15.813	By MS/MS	By MS/MS	By MS/MS	By matching	By matching	By matching	2.1	4	4	4	4	4
Q91YU8	Q91YU8	3	3	3	Suppressor of SWI4 1 homolog	Ppan	sp|Q91YU8|SSF1_MOUSE Suppressor of SWI4 1 homolog OS=Mus musculus OX=10090 GN=Ppan PE=1 SV=2	1	3	3	3	2	3	2	2	2	2	2	3	2	2	2	2	2	3	2	2	2	2	8.1	8.1	8.1	52.755	470	470	0	35.58	By MS/MS	By MS/MS	By MS/MS	By matching	By MS/MS	By MS/MS	4.5	8.1	4.5	4.5	4.5	4.5
Q91Z49	Q91Z49	1	1	1	UAP56-interacting factor	Fyttd1	sp|Q91Z49|UIF_MOUSE UAP56-interacting factor OS=Mus musculus OX=10090 GN=Fyttd1 PE=1 SV=1	1	1	1	1	0	1	1	1	1	1	0	1	1	1	1	1	0	1	1	1	1	1	4.1	4.1	4.1	35.887	317	317	0	10.633		By MS/MS	By MS/MS	By matching	By matching	By MS/MS	0	4.1	4.1	4.1	4.1	4.1
Q91ZA3;H3BL62;H3BKW6;H3BK61	Q91ZA3	7;2;1;1	7;2;1;1	7;2;1;1	Propionyl-CoA carboxylase alpha chain, mitochondrial	Pcca	sp|Q91ZA3|PCCA_MOUSE Propionyl-CoA carboxylase alpha chain, mitochondrial OS=Mus musculus OX=10090 GN=Pcca PE=1 SV=2	4	7	7	7	7	6	6	6	5	4	7	6	6	6	5	4	7	6	6	6	5	4	14.4	14.4	14.4	79.921	724	724;183;35;166	0	82.714	By MS/MS	By MS/MS	By MS/MS	By MS/MS	By MS/MS	By MS/MS	14.4	12.2	12.2	12.7	10.5	9.1
Q921F2;A0A087WR97;A0A087WRZ5;Q8R0B4;Q8BLD4;Q6VYI5;Q6VYI4;A0A087WRP4;H3BJV1;A0A087WSH7;A0A087WQA5;A0A087WS74;A0A087WSE4	Q921F2;A0A087WR97;A0A087WRZ5;Q8R0B4;Q8BLD4;Q6VYI5;Q6VYI4;A0A087WRP4;H3BJV1;A0A087WSH7;A0A087WQA5	4;3;3;3;3;3;3;2;2;2;2;1;1	4;3;3;3;3;3;3;2;2;2;2;1;1	4;3;3;3;3;3;3;2;2;2;2;1;1	TAR DNA-binding protein 43	Tardbp	sp|Q921F2|TADBP_MOUSE TAR DNA-binding protein 43 OS=Mus musculus OX=10090 GN=Tardbp PE=1 SV=1;tr|A0A087WR97|A0A087WR97_MOUSE TAR DNA-binding protein 43 (Fragment) OS=Mus musculus OX=10090 GN=Tardbp PE=1 SV=1;tr|A0A087WRZ5|A0A087WRZ5_MOUSE TAR DNA-binding p	13	4	4	4	4	4	4	4	4	4	4	4	4	4	4	4	4	4	4	4	4	4	11.4	11.4	11.4	44.547	414	414;243;285;295;298;302;304;138;140;175;200;128;149	0	35.345	By MS/MS	By MS/MS	By MS/MS	By matching	By MS/MS	By MS/MS	11.4	11.4	11.4	11.4	11.4	11.4
Q921K2;P11103	Q921K2;P11103	3;2	3;2	3;2	Poly [ADP-ribose] polymerase 1	Parp1	tr|Q921K2|Q921K2_MOUSE Poly [ADP-ribose] polymerase OS=Mus musculus OX=10090 GN=Parp1 PE=1 SV=1;sp|P11103|PARP1_MOUSE Poly [ADP-ribose] polymerase 1 OS=Mus musculus OX=10090 GN=Parp1 PE=1 SV=3	2	3	3	3	2	3	3	0	2	1	2	3	3	0	2	1	2	3	3	0	2	1	3.6	3.6	3.6	112.72	1014	1014;1013	0	19.329	By matching	By MS/MS	By MS/MS		By matching	By matching	2.3	3.6	3.6	0	2.3	1
Q921M3	Q921M3	1	1	1	Splicing factor 3B subunit 3	Sf3b3	sp|Q921M3|SF3B3_MOUSE Splicing factor 3B subunit 3 OS=Mus musculus OX=10090 GN=Sf3b3 PE=1 SV=1	1	1	1	1	1	1	1	0	1	1	1	1	1	0	1	1	1	1	1	0	1	1	1.2	1.2	1.2	135.55	1217	1217	0	6.6298	By matching	By MS/MS	By MS/MS		By matching	By matching	1.2	1.2	1.2	0	1.2	1.2
Q921P9	Q921P9	1	1	1	Transcription elongation factor A protein-like 1	Tceal1	sp|Q921P9|TCAL1_MOUSE Transcription elongation factor A protein-like 1 OS=Mus musculus OX=10090 GN=Tceal1 PE=2 SV=1	1	1	1	1	1	1	1	0	0	0	1	1	1	0	0	0	1	1	1	0	0	0	7.3	7.3	7.3	19.312	165	165	0	9.6185	By matching	By MS/MS	By MS/MS				7.3	7.3	7.3	0	0	0
Q922B2;Q8BJY7	Q922B2;Q8BJY7	4;2	4;2	4;2	Aspartate--tRNA ligase, cytoplasmic	Dars	sp|Q922B2|SYDC_MOUSE Aspartate--tRNA ligase, cytoplasmic OS=Mus musculus OX=10090 GN=Dars PE=1 SV=2;tr|Q8BJY7|Q8BJY7_MOUSE Aspartate--tRNA ligase, cytoplasmic OS=Mus musculus OX=10090 GN=Dars PE=1 SV=1	2	4	4	4	1	4	4	2	2	1	1	4	4	2	2	1	1	4	4	2	2	1	8.2	8.2	8.2	57.147	501	501;87	0	33.001	By MS/MS	By MS/MS	By MS/MS	By matching	By MS/MS	By matching	2.2	8.2	8.2	5.8	4.2	2.2
Q922D8;A0A1W2P733;A0A1W2P7L5	Q922D8;A0A1W2P733	11;7;1	11;7;1	10;6;1	C-1-tetrahydrofolate synthase, cytoplasmic;Methylenetetrahydrofolate dehydrogenase;Methenyltetrahydrofolate cyclohydrolase;Formyltetrahydrofolate synthetase;C-1-tetrahydrofolate synthase, cytoplasmic, N-terminally processed	Mthfd1	sp|Q922D8|C1TC_MOUSE C-1-tetrahydrofolate synthase, cytoplasmic OS=Mus musculus OX=10090 GN=Mthfd1 PE=1 SV=4;tr|A0A1W2P733|A0A1W2P733_MOUSE C-1-tetrahydrofolate synthase, cytoplasmic OS=Mus musculus OX=10090 GN=Mthfd1 PE=1 SV=1	3	11	11	10	10	9	9	1	3	3	10	9	9	1	3	3	9	8	9	1	3	2	12.1	12.1	11.3	101.2	935	935;755;160	0	73.97	By MS/MS	By MS/MS	By MS/MS	By matching	By matching	By matching	10.6	10.1	9.8	1	3	2.8
Q922F4	Q922F4	11	4	4	Tubulin beta-6 chain	Tubb6	sp|Q922F4|TBB6_MOUSE Tubulin beta-6 chain OS=Mus musculus OX=10090 GN=Tubb6 PE=1 SV=1	1	11	4	4	9	11	10	3	9	9	4	4	4	1	4	4	4	4	4	1	4	4	19.9	8.7	8.7	50.09	447	447	0	28.948	By MS/MS	By MS/MS	By MS/MS	By matching	By MS/MS	By matching	17.7	19.9	19.9	6.7	17.9	19.7
Q922J9;D3Z5W6;D3Z4N9	Q922J9;D3Z5W6;D3Z4N9	5;3;3	5;3;3	5;3;3	Fatty acyl-CoA reductase 1	Far1	sp|Q922J9|FACR1_MOUSE Fatty acyl-CoA reductase 1 OS=Mus musculus OX=10090 GN=Far1 PE=1 SV=1;tr|D3Z5W6|D3Z5W6_MOUSE Fatty acyl-CoA reductase (Fragment) OS=Mus musculus OX=10090 GN=Far1 PE=1 SV=1;tr|D3Z4N9|D3Z4N9_MOUSE Fatty acyl-CoA reductase (Fragment) OS=	3	5	5	5	5	5	5	0	2	3	5	5	5	0	2	3	5	5	5	0	2	3	10.9	10.9	10.9	59.434	515	515;181;206	0	46.468	By MS/MS	By MS/MS	By MS/MS		By matching	By matching	10.9	10.9	10.9	0	4.1	5.8
Q922Y1	Q922Y1	1	1	1	UBX domain-containing protein 1	Ubxn1	sp|Q922Y1|UBXN1_MOUSE UBX domain-containing protein 1 OS=Mus musculus OX=10090 GN=Ubxn1 PE=1 SV=1	1	1	1	1	1	1	0	0	0	0	1	1	0	0	0	0	1	1	0	0	0	0	2.7	2.7	2.7	33.572	297	297	1	-2	By MS/MS	By matching					2.7	2.7	0	0	0	0
Q923D4	Q923D4	1	1	1	Splicing factor 3B subunit 5	Sf3b5	sp|Q923D4|SF3B5_MOUSE Splicing factor 3B subunit 5 OS=Mus musculus OX=10090 GN=Sf3b5 PE=1 SV=1	1	1	1	1	1	1	1	1	1	1	1	1	1	1	1	1	1	1	1	1	1	1	17.4	17.4	17.4	10.119	86	86	0	7.3219	By MS/MS	By MS/MS	By MS/MS	By matching	By matching	By matching	17.4	17.4	17.4	17.4	17.4	17.4
Q925I1;H3BK90;H3BKI6;V9GWS6;V9GWS5	Q925I1	15;7;5;3;2	15;7;5;3;2	15;7;5;3;2	ATPase family AAA domain-containing protein 3	Atad3	sp|Q925I1|ATAD3_MOUSE ATPase family AAA domain-containing protein 3 OS=Mus musculus OX=10090 GN=Atad3 PE=1 SV=1	5	15	15	15	11	14	13	0	1	1	11	14	13	0	1	1	11	14	13	0	1	1	25.7	25.7	25.7	66.741	591	591;218;211;83;127	0	110.07	By MS/MS	By MS/MS	By MS/MS		By matching	By matching	17.9	24	21.5	0	1.9	1.9
Q99J95;E9Q9E4;E9PZX7;E3W997;E9PVC7;A0A1L1SUS7;A0A1Y7VLM0;Q80YP0;P30285;Q64261;P97377;Q3V3A1;Q04899;O35495;Q04735;Q8K0D0;Q14AX6;Q69ZA1	Q99J95;E9Q9E4;E9PZX7;E3W997;E9PVC7;A0A1L1SUS7;A0A1Y7VLM0;Q80YP0;P30285;Q64261;P97377;Q3V3A1;Q04899;O35495;Q04735;Q8K0D0;Q14AX6;Q69ZA1	2;1;1;1;1;1;1;1;1;1;1;1;1;1;1;1;1;1	2;1;1;1;1;1;1;1;1;1;1;1;1;1;1;1;1;1	1;0;0;0;0;0;0;0;0;0;0;0;0;0;0;0;0;0	Cyclin-dependent kinase 9;Cyclin-dependent kinase 3;Cyclin-dependent kinase 4;Cyclin-dependent kinase 6;Cyclin-dependent kinase 2;Cyclin-dependent kinase 15;Cyclin-dependent kinase 18;Cyclin-dependent kinase 14;Cyclin-dependent kinase 16;Cyclin-dependent kinase 17;Cyclin-dependent kinase 12;Cyclin-dependent kinase 13	Cdk9;Cdk4;Cdk15;Cdk14;Cdk3;Cdk6;Cdk2;Cdk18;Cdk16;Cdk17;Cdk12;Cdk13	sp|Q99J95|CDK9_MOUSE Cyclin-dependent kinase 9 OS=Mus musculus OX=10090 GN=Cdk9 PE=1 SV=1;tr|E9Q9E4|E9Q9E4_MOUSE Cyclin-dependent kinase 4 (Fragment) OS=Mus musculus OX=10090 GN=Cdk4 PE=1 SV=1;tr|E9PZX7|E9PZX7_MOUSE Cyclin-dependent kinase 4 (Fragment) OS=	18	2	2	1	2	2	2	0	1	2	2	2	2	0	1	2	1	1	1	0	0	1	5.4	5.4	3.2	42.761	372	372;253;271;435;451;481;837;303;303;326;346;433;451;469;496;523;1484;1511	0	17.863	By MS/MS	By MS/MS	By MS/MS		By matching	By matching	5.4	5.4	5.4	0	2.2	5.4
Q99JA0	Q99JA0	1	1	1	Calcitonin gene-related peptide 1	Calca	sp|Q99JA0|CALCA_MOUSE Calcitonin gene-related peptide 1 OS=Mus musculus OX=10090 GN=Calca PE=2 SV=1	1	1	1	1	1	1	1	1	1	1	1	1	1	1	1	1	1	1	1	1	1	1	5.5	5.5	5.5	14.065	128	128	0	8.509	By MS/MS	By MS/MS	By MS/MS	By matching	By MS/MS	By MS/MS	5.5	5.5	5.5	5.5	5.5	5.5
Q99JB2;A2AG39;F6WI02	Q99JB2	3;1;1	3;1;1	3;1;1	Stomatin-like protein 2, mitochondrial	Stoml2	sp|Q99JB2|STML2_MOUSE Stomatin-like protein 2, mitochondrial OS=Mus musculus OX=10090 GN=Stoml2 PE=1 SV=1	3	3	3	3	3	3	3	2	2	3	3	3	3	2	2	3	3	3	3	2	2	3	10.8	10.8	10.8	38.384	353	353;286;287	0	33.287	By MS/MS	By MS/MS	By MS/MS	By matching	By matching	By matching	10.8	10.8	10.8	7.6	7.1	10.8
Q99JR1	Q99JR1	1	1	1	Sideroflexin-1	Sfxn1	sp|Q99JR1|SFXN1_MOUSE Sideroflexin-1 OS=Mus musculus OX=10090 GN=Sfxn1 PE=1 SV=3	1	1	1	1	1	1	1	0	0	0	1	1	1	0	0	0	1	1	1	0	0	0	4	4	4	35.649	322	322	0	6.2638	By matching	By MS/MS	By MS/MS				4	4	4	0	0	0
Q99JX7;V9GXW3;V9GXF3	Q99JX7;V9GXW3;V9GXF3	2;1;1	2;1;1	2;1;1	Nuclear RNA export factor 1	Nxf1	sp|Q99JX7|NXF1_MOUSE Nuclear RNA export factor 1 OS=Mus musculus OX=10090 GN=Nxf1 PE=1 SV=3;tr|V9GXW3|V9GXW3_MOUSE Nuclear RNA export factor 1 OS=Mus musculus OX=10090 GN=Nxf1 PE=1 SV=1;tr|V9GXF3|V9GXF3_MOUSE Nuclear RNA export factor 1 OS=Mus musculus OX=	3	2	2	2	2	2	2	1	2	1	2	2	2	1	2	1	2	2	2	1	2	1	3.1	3.1	3.1	70.299	618	618;282;418	0	11.43	By MS/MS	By matching	By MS/MS	By matching	By matching	By matching	3.1	3.1	3.1	1.5	3.1	1.6
Q99JY0;D3YXU1	Q99JY0;D3YXU1	4;3	4;3	4;3	Trifunctional enzyme subunit beta, mitochondrial;3-ketoacyl-CoA thiolase	Hadhb	sp|Q99JY0|ECHB_MOUSE Trifunctional enzyme subunit beta, mitochondrial OS=Mus musculus OX=10090 GN=Hadhb PE=1 SV=1;tr|D3YXU1|D3YXU1_MOUSE Trifunctional enzyme subunit beta, mitochondrial (Fragment) OS=Mus musculus OX=10090 GN=Hadhb PE=1 SV=1	2	4	4	4	2	3	3	1	1	1	2	3	3	1	1	1	2	3	3	1	1	1	7.6	7.6	7.6	51.386	475	475;173	0	24.827	By MS/MS	By MS/MS	By MS/MS	By matching	By matching	By matching	3.8	5.7	5.7	1.9	1.9	1.9
Q99K46;A0A0A6YW28;P35123	Q99K46	6;1;1	6;1;1	5;0;0	Ubiquitin carboxyl-terminal hydrolase 11	Usp11	sp|Q99K46|UBP11_MOUSE Ubiquitin carboxyl-terminal hydrolase 11 OS=Mus musculus OX=10090 GN=Usp11 PE=1 SV=4	3	6	6	5	5	5	4	1	0	0	5	5	4	1	0	0	4	5	4	1	0	0	6.5	6.5	5.5	105.38	921	921;915;962	0	55.56	By MS/MS	By MS/MS	By MS/MS	By matching			5	5.5	4	0.9	0	0
Q99K48	Q99K48	6	5	5	Non-POU domain-containing octamer-binding protein	Nono	sp|Q99K48|NONO_MOUSE Non-POU domain-containing octamer-binding protein OS=Mus musculus OX=10090 GN=Nono PE=1 SV=3	1	6	5	5	3	5	5	2	5	3	2	4	4	2	4	2	2	4	4	2	4	2	13.7	12.1	12.1	54.54	473	473	0	35.077	By matching	By MS/MS	By MS/MS	By matching	By matching	By matching	7.6	12.1	11.8	5.9	12.1	7.6
Q99K70;B1AWT4;B1AWT2;B1AWT3;Q7TT45	Q99K70;B1AWT4;B1AWT2;B1AWT3;Q7TT45	3;2;2;2;2	3;2;2;2;2	3;2;2;2;2	Ras-related GTP-binding protein C;Ras-related GTP-binding protein D	Rragc;Rragd	sp|Q99K70|RRAGC_MOUSE Ras-related GTP-binding protein C OS=Mus musculus OX=10090 GN=Rragc PE=1 SV=1;tr|B1AWT4|B1AWT4_MOUSE Ras-related GTP-binding protein D OS=Mus musculus OX=10090 GN=Rragd PE=1 SV=1;tr|B1AWT2|B1AWT2_MOUSE Ras-related GTP binding D, isofo	5	3	3	3	0	0	0	2	3	3	0	0	0	2	3	3	0	0	0	2	3	3	10.1	10.1	10.1	44.12	398	398;279;399;454;449	0	22.257				By matching	By MS/MS	By MS/MS	0	0	0	6.5	10.1	10.1
Q99KV1	Q99KV1	3	3	3	DnaJ homolog subfamily B member 11	Dnajb11	sp|Q99KV1|DJB11_MOUSE DnaJ homolog subfamily B member 11 OS=Mus musculus OX=10090 GN=Dnajb11 PE=1 SV=1	1	3	3	3	2	3	2	0	1	3	2	3	2	0	1	3	2	3	2	0	1	3	10.1	10.1	10.1	40.555	358	358	0	17.68	By matching	By MS/MS	By matching		By matching	By MS/MS	7	10.1	7	0	3.1	10.1
Q99KX1	Q99KX1	2	2	2	Myeloid leukemia factor 2	Mlf2	sp|Q99KX1|MLF2_MOUSE Myeloid leukemia factor 2 OS=Mus musculus OX=10090 GN=Mlf2 PE=1 SV=1	1	2	2	2	2	2	2	1	2	2	2	2	2	1	2	2	2	2	2	1	2	2	8.5	8.5	8.5	28.055	247	247	0	13.581	By MS/MS	By MS/MS	By MS/MS	By matching	By matching	By matching	8.5	8.5	8.5	4.9	8.5	8.5
Q99L45;E0CXJ3	Q99L45	3;1	3;1	3;1	Eukaryotic translation initiation factor 2 subunit 2	Eif2s2	sp|Q99L45|IF2B_MOUSE Eukaryotic translation initiation factor 2 subunit 2 OS=Mus musculus OX=10090 GN=Eif2s2 PE=1 SV=1	2	3	3	3	2	2	3	0	1	1	2	2	3	0	1	1	2	2	3	0	1	1	11.8	11.8	11.8	38.092	331	331;118	0	22.182	By MS/MS	By MS/MS	By MS/MS		By matching	By matching	9.1	9.1	11.8	0	6	6
Q99L48	Q99L48	1	1	1	60S ribosomal export protein NMD3	Nmd3	sp|Q99L48|NMD3_MOUSE 60S ribosomal export protein NMD3 OS=Mus musculus OX=10090 GN=Nmd3 PE=1 SV=1	1	1	1	1	1	1	1	0	0	0	1	1	1	0	0	0	1	1	1	0	0	0	3.4	3.4	3.4	57.611	503	503	0	12.017	By matching	By MS/MS	By MS/MS				3.4	3.4	3.4	0	0	0
Q99LC5	Q99LC5	4	4	4	Electron transfer flavoprotein subunit alpha, mitochondrial	Etfa	sp|Q99LC5|ETFA_MOUSE Electron transfer flavoprotein subunit alpha, mitochondrial OS=Mus musculus OX=10090 GN=Etfa PE=1 SV=2	1	4	4	4	4	4	4	0	1	2	4	4	4	0	1	2	4	4	4	0	1	2	16.2	16.2	16.2	35.009	333	333	0	26.173	By MS/MS	By MS/MS	By MS/MS		By matching	By matching	16.2	16.2	16.2	0	5.4	5.1
Q99LE6	Q99LE6	14	14	14	ATP-binding cassette sub-family F member 2	Abcf2	sp|Q99LE6|ABCF2_MOUSE ATP-binding cassette sub-family F member 2 OS=Mus musculus OX=10090 GN=Abcf2 PE=1 SV=1	1	14	14	14	11	14	11	10	9	9	11	14	11	10	9	9	11	14	11	10	9	9	16.4	16.4	16.4	71.781	628	628	0	100.16	By MS/MS	By MS/MS	By MS/MS	By matching	By MS/MS	By MS/MS	14.6	16.4	14.3	13.2	11.1	11.1
Q99LF4	Q99LF4	6	6	6	tRNA-splicing ligase RtcB homolog	Rtcb	sp|Q99LF4|RTCB_MOUSE tRNA-splicing ligase RtcB homolog OS=Mus musculus OX=10090 GN=Rtcb PE=1 SV=1	1	6	6	6	4	6	4	1	5	2	4	6	4	1	5	2	4	6	4	1	5	2	11.9	11.9	11.9	55.249	505	505	0	37.595	By MS/MS	By MS/MS	By MS/MS	By matching	By matching	By matching	8.3	11.9	8.5	2.4	10.1	4
Q99LX5	Q99LX5	2	2	2	Multiple myeloma tumor-associated protein 2 homolog	Mmtag2	sp|Q99LX5|MMTA2_MOUSE Multiple myeloma tumor-associated protein 2 homolog OS=Mus musculus OX=10090 GN=Mmtag2 PE=2 SV=1	1	2	2	2	2	2	2	1	2	2	2	2	2	1	2	2	2	2	2	1	2	2	10.4	10.4	10.4	29.298	260	260	0	15.546	By matching	By MS/MS	By MS/MS	By matching	By MS/MS	By matching	10.4	10.4	10.4	5.4	10.4	10.4
Q99M08	Q99M08	1	1	1	Uncharacterized protein C4orf3 homolog		sp|Q99M08|CD003_MOUSE Uncharacterized protein C4orf3 homolog OS=Mus musculus OX=10090 PE=1 SV=1	1	1	1	1	1	1	1	0	1	1	1	1	1	0	1	1	1	1	1	0	1	1	21.5	21.5	21.5	7.4043	65	65	0	19.276	By MS/MS	By MS/MS	By MS/MS		By matching	By matching	21.5	21.5	21.5	0	21.5	21.5
Q99M28	Q99M28	1	1	1	RNA-binding protein with serine-rich domain 1	Rnps1	sp|Q99M28|RNPS1_MOUSE RNA-binding protein with serine-rich domain 1 OS=Mus musculus OX=10090 GN=Rnps1 PE=1 SV=1	1	1	1	1	1	1	1	1	1	1	1	1	1	1	1	1	1	1	1	1	1	1	4.9	4.9	4.9	34.208	305	305	0	10.168	By matching	By matching	By MS/MS	By matching	By matching	By MS/MS	4.9	4.9	4.9	4.9	4.9	4.9
Q99M87	Q99M87	2	2	2	DnaJ homolog subfamily A member 3, mitochondrial	Dnaja3	sp|Q99M87|DNJA3_MOUSE DnaJ homolog subfamily A member 3, mitochondrial OS=Mus musculus OX=10090 GN=Dnaja3 PE=1 SV=1	1	2	2	2	2	2	2	0	0	0	2	2	2	0	0	0	2	2	2	0	0	0	5.8	5.8	5.8	52.443	480	480	0	17.775	By MS/MS	By MS/MS	By MS/MS				5.8	5.8	5.8	0	0	0
Q99ME9;A0A217FL53	Q99ME9	3;1	3;1	3;1	Nucleolar GTP-binding protein 1	Gtpbp4	sp|Q99ME9|NOG1_MOUSE Nucleolar GTP-binding protein 1 OS=Mus musculus OX=10090 GN=Gtpbp4 PE=1 SV=3	2	3	3	3	3	3	3	1	3	3	3	3	3	1	3	3	3	3	3	1	3	3	4.9	4.9	4.9	74.112	634	634;164	0	18.58	By MS/MS	By MS/MS	By MS/MS	By matching	By MS/MS	By matching	4.9	4.9	4.9	1.3	4.9	4.9
Q99MN1;Q8R2P8	Q99MN1;Q8R2P8	13;11	13;11	13;11	Lysine--tRNA ligase	Kars	sp|Q99MN1|SYK_MOUSE Lysine--tRNA ligase OS=Mus musculus OX=10090 GN=Kars PE=1 SV=1;tr|Q8R2P8|Q8R2P8_MOUSE Lysine--tRNA ligase OS=Mus musculus OX=10090 GN=Kars PE=1 SV=1	2	13	13	13	11	13	11	7	12	11	11	13	11	7	12	11	11	13	11	7	12	11	19.2	19.2	19.2	67.839	595	595;624	0	204.17	By MS/MS	By MS/MS	By MS/MS	By MS/MS	By MS/MS	By MS/MS	17	19.2	17	10.6	17	15.3
Q99MR8;A0A0G2JF64;A0A0G2JFQ5	Q99MR8	7;2;1	7;2;1	7;2;1	Methylcrotonoyl-CoA carboxylase subunit alpha, mitochondrial	Mccc1	sp|Q99MR8|MCCA_MOUSE Methylcrotonoyl-CoA carboxylase subunit alpha, mitochondrial OS=Mus musculus OX=10090 GN=Mccc1 PE=1 SV=2	3	7	7	7	7	4	4	4	4	4	7	4	4	4	4	4	7	4	4	4	4	4	13.1	13.1	13.1	79.343	717	717;201;255	0	48.89	By MS/MS	By MS/MS	By MS/MS	By matching	By MS/MS	By matching	13.1	8.4	9.1	9.2	9.1	9.2
Q99N87;B2FDG7	Q99N87;B2FDG7	2;1	2;1	2;1	28S ribosomal protein S5, mitochondrial	Mrps5	sp|Q99N87|RT05_MOUSE 28S ribosomal protein S5, mitochondrial OS=Mus musculus OX=10090 GN=Mrps5 PE=1 SV=1;tr|B2FDG7|B2FDG7_MOUSE 28S ribosomal protein S5, mitochondrial (Fragment) OS=Mus musculus OX=10090 GN=Mrps5 PE=1 SV=1	2	2	2	2	2	1	1	0	1	2	2	1	1	0	1	2	2	1	1	0	1	2	4.9	4.9	4.9	48.206	432	432;139	0	11.862	By MS/MS	By MS/MS	By MS/MS		By matching	By matching	4.9	2.5	2.5	0	2.3	4.9
Q99NA9	Q99NA9	2	2	2	Polycomb group RING finger protein 6	Pcgf6	sp|Q99NA9|PCGF6_MOUSE Polycomb group RING finger protein 6 OS=Mus musculus OX=10090 GN=Pcgf6 PE=1 SV=1	1	2	2	2	2	2	2	0	0	0	2	2	2	0	0	0	2	2	2	0	0	0	7.1	7.1	7.1	39.82	353	353	0	16.991	By MS/MS	By MS/MS	By MS/MS				7.1	7.1	7.1	0	0	0
Q99NF7;P36993;Q9EQE2;P49443	Q99NF7;P36993	4;3;1;1	4;3;1;1	4;3;1;1	Protein phosphatase 1B	Ppm1b	tr|Q99NF7|Q99NF7_MOUSE Ppm1b protein OS=Mus musculus OX=10090 GN=Ppm1b PE=1 SV=1;sp|P36993|PPM1B_MOUSE Protein phosphatase 1B OS=Mus musculus OX=10090 GN=Ppm1b PE=1 SV=1	4	4	4	4	3	1	2	2	2	2	3	1	2	2	2	2	3	1	2	2	2	2	9	9	9	52.11	477	477;390;323;382	0	24.028	By MS/MS	By MS/MS	By MS/MS	By matching	By MS/MS	By MS/MS	7.1	1.9	4.4	4.6	4.6	4.6
Q99PA7	Q99PA7	3	3	3		4930550L24Rik	tr|Q99PA7|Q99PA7_MOUSE MCG117379 OS=Mus musculus OX=10090 GN=4930550L24Rik PE=1 SV=1	1	3	3	3	3	2	3	1	1	0	3	2	3	1	1	0	3	2	3	1	1	0	14.7	14.7	14.7	35.043	320	320	0	31.045	By MS/MS	By MS/MS	By MS/MS	By matching	By matching		14.7	11.9	14.7	7.5	7.5	0
Q9CPS7	Q9CPS7	1	1	1	RNA-binding protein PNO1	Pno1	sp|Q9CPS7|PNO1_MOUSE RNA-binding protein PNO1 OS=Mus musculus OX=10090 GN=Pno1 PE=1 SV=1	1	1	1	1	0	0	1	0	0	0	0	0	1	0	0	0	0	0	1	0	0	0	7.3	7.3	7.3	27.453	248	248	0	10.83			By MS/MS				0	0	7.3	0	0	0
Q9CQA3	Q9CQA3	3	3	3	Succinate dehydrogenase [ubiquinone] iron-sulfur subunit, mitochondrial	Sdhb	sp|Q9CQA3|SDHB_MOUSE Succinate dehydrogenase [ubiquinone] iron-sulfur subunit, mitochondrial OS=Mus musculus OX=10090 GN=Sdhb PE=1 SV=1	1	3	3	3	2	3	2	0	2	2	2	3	2	0	2	2	2	3	2	0	2	2	11	11	11	31.814	282	282	0	22.047	By MS/MS	By MS/MS	By MS/MS		By matching	By matching	7.1	11	7.1	0	7.1	7.1
Q9CQM8;O09167	Q9CQM8;O09167	2;1	2;1	2;1	60S ribosomal protein L21	Rpl21	tr|Q9CQM8|Q9CQM8_MOUSE 60S ribosomal protein L21 OS=Mus musculus OX=10090 GN=Rpl21 PE=1 SV=1;sp|O09167|RL21_MOUSE 60S ribosomal protein L21 OS=Mus musculus OX=10090 GN=Rpl21 PE=1 SV=3	2	2	2	2	1	2	2	2	2	2	1	2	2	2	2	2	1	2	2	2	2	2	9.4	9.4	9.4	18.579	160	160;160	0	11.65	By MS/MS	By MS/MS	By MS/MS	By matching	By matching	By matching	5	9.4	9.4	9.4	9.4	9.4
Q9CQN1	Q9CQN1	2	2	2	Heat shock protein 75 kDa, mitochondrial	Trap1	sp|Q9CQN1|TRAP1_MOUSE Heat shock protein 75 kDa, mitochondrial OS=Mus musculus OX=10090 GN=Trap1 PE=1 SV=1	1	2	2	2	2	2	2	1	2	2	2	2	2	1	2	2	2	2	2	1	2	2	2.5	2.5	2.5	80.208	706	706	0	11.437	By MS/MS	By matching	By MS/MS	By matching	By matching	By matching	2.5	2.5	2.5	1.4	2.5	2.5
Q9CQN7	Q9CQN7	1	1	1	39S ribosomal protein L41, mitochondrial	Mrpl41	sp|Q9CQN7|RM41_MOUSE 39S ribosomal protein L41, mitochondrial OS=Mus musculus OX=10090 GN=Mrpl41 PE=1 SV=1	1	1	1	1	1	1	1	0	0	0	1	1	1	0	0	0	1	1	1	0	0	0	8.9	8.9	8.9	15.261	135	135	0	6.78	By matching	By MS/MS	By MS/MS				8.9	8.9	8.9	0	0	0
Q9CQR2	Q9CQR2	3	3	3	40S ribosomal protein S21	Rps21	sp|Q9CQR2|RS21_MOUSE 40S ribosomal protein S21 OS=Mus musculus OX=10090 GN=Rps21 PE=1 SV=1	1	3	3	3	3	3	2	2	3	3	3	3	2	2	3	3	3	3	2	2	3	3	30.1	30.1	30.1	9.1413	83	83	0	37.357	By MS/MS	By MS/MS	By MS/MS	By MS/MS	By MS/MS	By MS/MS	30.1	30.1	28.9	28.9	30.1	30.1
Q9CQS8;E9PW43	Q9CQS8;E9PW43	3;2	3;2	3;2	Protein transport protein Sec61 subunit beta	Sec61b;Gm10320	sp|Q9CQS8|SC61B_MOUSE Protein transport protein Sec61 subunit beta OS=Mus musculus OX=10090 GN=Sec61b PE=1 SV=3;tr|E9PW43|E9PW43_MOUSE Protein transport protein Sec61 subunit beta OS=Mus musculus OX=10090 GN=Gm10320 PE=3 SV=1	2	3	3	3	3	3	3	1	2	1	3	3	3	1	2	1	3	3	3	1	2	1	37.5	37.5	37.5	9.9583	96	96;113	0	32.186	By MS/MS	By MS/MS	By MS/MS	By matching	By MS/MS	By matching	37.5	37.5	37.5	15.6	27.1	15.6
Q9CQU0	Q9CQU0	2	2	2	Thioredoxin domain-containing protein 12	Txndc12	sp|Q9CQU0|TXD12_MOUSE Thioredoxin domain-containing protein 12 OS=Mus musculus OX=10090 GN=Txndc12 PE=1 SV=1	1	2	2	2	2	2	2	0	0	0	2	2	2	0	0	0	2	2	2	0	0	0	14.1	14.1	14.1	19.048	170	170	0	22.739	By MS/MS	By MS/MS	By MS/MS				14.1	14.1	14.1	0	0	0
Q9CQX2	Q9CQX2	2	2	2	Cytochrome b5 type B	Cyb5b	sp|Q9CQX2|CYB5B_MOUSE Cytochrome b5 type B OS=Mus musculus OX=10090 GN=Cyb5b PE=1 SV=1	1	2	2	2	1	0	2	2	1	2	1	0	2	2	1	2	1	0	2	2	1	2	13	13	13	16.318	146	146	0	11.715	By matching		By MS/MS	By matching	By MS/MS	By MS/MS	8.2	0	13	13	4.8	13
Q9CR00;A0A0G2JGN6	Q9CR00	4;1	4;1	4;1	26S proteasome non-ATPase regulatory subunit 9	Psmd9	sp|Q9CR00|PSMD9_MOUSE 26S proteasome non-ATPase regulatory subunit 9 OS=Mus musculus OX=10090 GN=Psmd9 PE=1 SV=1	2	4	4	4	3	3	4	0	1	2	3	3	4	0	1	2	3	3	4	0	1	2	15.3	15.3	15.3	24.72	222	222;175	0	25.137	By MS/MS	By MS/MS	By MS/MS		By matching	By matching	12.2	12.2	15.3	0	4.1	8.1
Q9CR57;A0A1L1SUF6	Q9CR57	5;2	5;2	5;2	60S ribosomal protein L14	Rpl14	sp|Q9CR57|RL14_MOUSE 60S ribosomal protein L14 OS=Mus musculus OX=10090 GN=Rpl14 PE=1 SV=3	2	5	5	5	4	5	4	5	3	3	4	5	4	5	3	3	4	5	4	5	3	3	25.3	25.3	25.3	23.564	217	217;63	0	39.039	By MS/MS	By MS/MS	By MS/MS	By MS/MS	By MS/MS	By MS/MS	20.7	25.3	20.7	25.3	15.2	15.2
Q9CR62;Q5SX48;Q5SX46	Q9CR62;Q5SX48;Q5SX46	2;1;1	2;1;1	2;1;1	Mitochondrial 2-oxoglutarate/malate carrier protein	Slc25a11	sp|Q9CR62|M2OM_MOUSE Mitochondrial 2-oxoglutarate/malate carrier protein OS=Mus musculus OX=10090 GN=Slc25a11 PE=1 SV=3;tr|Q5SX48|Q5SX48_MOUSE Mitochondrial 2-oxoglutarate/malate carrier protein (Fragment) OS=Mus musculus OX=10090 GN=Slc25a11 PE=1 SV=1;tr|	3	2	2	2	2	1	2	1	1	2	2	1	2	1	1	2	2	1	2	1	1	2	6.1	6.1	6.1	34.155	314	314;76;193	0	13.032	By MS/MS	By MS/MS	By MS/MS	By matching	By matching	By matching	6.1	3.2	6.1	3.2	3.2	6.1
Q9CU62	Q9CU62	4	4	4	Structural maintenance of chromosomes protein 1A	Smc1a	sp|Q9CU62|SMC1A_MOUSE Structural maintenance of chromosomes protein 1A OS=Mus musculus OX=10090 GN=Smc1a PE=1 SV=4	1	4	4	4	3	4	4	0	0	1	3	4	4	0	0	1	3	4	4	0	0	1	3.4	3.4	3.4	143.23	1233	1233	0	30.719	By MS/MS	By MS/MS	By MS/MS			By matching	2.5	3.4	3.4	0	0	0.8
Q9CW03	Q9CW03	7	7	7	Structural maintenance of chromosomes protein 3	Smc3	sp|Q9CW03|SMC3_MOUSE Structural maintenance of chromosomes protein 3 OS=Mus musculus OX=10090 GN=Smc3 PE=1 SV=2	1	7	7	7	7	7	7	0	2	3	7	7	7	0	2	3	7	7	7	0	2	3	5.4	5.4	5.4	141.55	1217	1217	0	49.958	By MS/MS	By MS/MS	By MS/MS		By matching	By matching	5.4	5.4	5.4	0	1.8	3
Q9CWF2	Q9CWF2	11	1	1	Tubulin beta-2B chain	Tubb2b	sp|Q9CWF2|TBB2B_MOUSE Tubulin beta-2B chain OS=Mus musculus OX=10090 GN=Tubb2b PE=1 SV=1	1	11	1	1	9	11	10	5	10	8	1	1	1	0	1	1	1	1	1	0	1	1	21.1	2.7	2.7	49.953	445	445	0	13.1	By MS/MS	By MS/MS	By MS/MS	By matching	By MS/MS	By MS/MS	18.9	21.1	21.1	9.9	21.1	17.5
Q9CWG8	Q9CWG8	1	1	1	NADH dehydrogenase [ubiquinone] complex I, assembly factor 7	Ndufaf7	sp|Q9CWG8|NDUF7_MOUSE Protein arginine methyltransferase NDUFAF7, mitochondrial OS=Mus musculus OX=10090 GN=Ndufaf7 PE=1 SV=4	1	1	1	1	1	1	1	0	0	1	1	1	1	0	0	1	1	1	1	0	0	1	2.3	2.3	2.3	48.384	436	436	0.008316	5.8868	By matching	By matching	By MS/MS			By matching	2.3	2.3	2.3	0	0	2.3
Q9CX86	Q9CX86	2	2	2	Heterogeneous nuclear ribonucleoprotein A0	Hnrnpa0	sp|Q9CX86|ROA0_MOUSE Heterogeneous nuclear ribonucleoprotein A0 OS=Mus musculus OX=10090 GN=Hnrnpa0 PE=1 SV=1	1	2	2	2	1	2	1	1	1	1	1	2	1	1	1	1	1	2	1	1	1	1	8.5	8.5	8.5	30.53	305	305	0	13.602	By matching	By MS/MS	By matching	By matching	By matching	By matching	3.6	8.5	3.6	4.9	4.9	4.9
Q9CXL3;A0A0G2JEY4	Q9CXL3;A0A0G2JEY4	5;4	5;4	5;4	Uncharacterized protein C7orf50 homolog		sp|Q9CXL3|CG050_MOUSE Uncharacterized protein C7orf50 homolog OS=Mus musculus OX=10090 PE=1 SV=3;tr|A0A0G2JEY4|A0A0G2JEY4_MOUSE RIKEN cDNA 3110082I17 gene OS=Mus musculus OX=10090 GN=3110082I17Rik PE=1 SV=1	2	5	5	5	3	4	4	2	3	3	3	4	4	2	3	3	3	4	4	2	3	3	20	20	20	22.168	195	195;178	0	37.815	By MS/MS	By MS/MS	By MS/MS	By MS/MS	By matching	By matching	13.3	20	20	11.3	20	20
Q9CXW2	Q9CXW2	2	2	2	28S ribosomal protein S22, mitochondrial	Mrps22	sp|Q9CXW2|RT22_MOUSE 28S ribosomal protein S22, mitochondrial OS=Mus musculus OX=10090 GN=Mrps22 PE=1 SV=1	1	2	2	2	2	2	2	0	1	0	2	2	2	0	1	0	2	2	2	0	1	0	6.4	6.4	6.4	41.192	359	359	0	12.161	By MS/MS	By MS/MS	By matching		By matching		6.4	6.4	6.4	0	3.1	0
[truncated: 114 more rows]
[truncated: 32 more columns]

## Sheet: 2_N2a_HA-IP_Stats
Peptides HA-CCNF_1	Peptides HA-CCNF_2	Peptides HA-CCNF_3	Peptides HA-TBC1D7	Peptides HA-TBC1D7_2	Peptides HA-TBC1D7_3	LFQ intensity HA-CCNF_1	LFQ intensity HA-CCNF_2	LFQ intensity HA-CCNF_3	LFQ intensity HA-TBC1D7	LFQ intensity 2-TBC1D7_2	LFQ intensity 2-TBC1D7_3	Student's T-test Significant HA-CCNF_HA-TBC1D7	Student's T-test significant	-Log Student's T-test p-value HA-CCNF_HA-TBC1D7	Student's T-test Difference HA-CCNF_HA-TBC1D7	Student's T-test Test statistic HA-CCNF_HA-TBC1D7	Student's T-test Significant HA-CCNF_HA-TBC1D7_	Student's T-test significant_	-Log Student's T-test p-value HA-CCNF_HA-TBC1D7_	Student's T-test q-value HA-CCNF_HA-TBC1D7	Student's T-test Difference HA-CCNF_HA-TBC1D7_	Student's T-test Test statistic HA-CCNF_HA-TBC1D7_	Protein names	Gene names
[truncated: 506 more rows]

[truncated: 2 more sheets: 3_SH-SY5Y_HA-IP_Orig., 4_SH-SY5Y_HA-IP_Stats]
